# Supplementary material for: RNA-Seq, co-expression network and eQTL analysis identify key genes for chlorophyll and carbon metabolism in rice
Source: Research Square preprint supplement (doi:10.21203/rs.3.rs-2517802/v1), 2023-02-08
Supplement: Supplementary file 1 [file 162d00233e2b1b3ea088c054.xlsx]

## Sheet: Sheet1
				23 Na [ He ]		24 Mg [ He ]		31 P [ He ]		39 K [ He ]		43 Ca [ He ]		52 Cr [ He ]		55 Mn [ He ]		56 Fe [ He ]		63 Cu [ He ]		66 Zn [ He ]		78 Se [ He ]
Type	Sample Name	Dilution (ml)	Vial Number (gm)	Conc. [ ppb ]	Conc. RSD	Conc. [ ppb ]	Conc. RSD	Conc. [ ppb ]	Conc. RSD	Conc. [ ppb ]	Conc. RSD	Conc. [ ppb ]	Conc. RSD	Conc. [ ppb ]	Conc. RSD	Conc. [ ppb ]	Conc. RSD	Conc. [ ppb ]	Conc. RSD	Conc. [ ppb ]	Conc. RSD	Conc. [ ppb ]	Conc. RSD	Conc. [ ppb ]	Conc. RSD
CalStd	blank			0	N/A	0	N/A	0	N/A	0	N/A	0	N/A	0	N/A	0	N/A	0	N/A	0	N/A	0	N/A	0	N/A
CalStd	10 ppb			<0.000	N/A	8.53427	4.39859	8.66232	9.42833	<0.000	N/A	8.06636	3.85789	12.4978	3.97038	12.1999	3.66876	11.3426	3.98676	12.0774	3.74229	10.9641	4.70508	9.90956	3.12682
CalStd	20 ppb			<0.000	N/A	17.114	9.8435	18.156	3.35263	8.15457	30.2258	16.5175	13.6486	22.5961	8.67476	22.3589	8.86895	22.0381	7.25471	22.3921	10.379	20.6204	8.86845	17.8584	5.44478
CalStd	50 ppb			37.4801	12.892	45.5405	5.42633	26.5556	18.7159	49.7783	7.37705	43.4739	7.8224	45.8385	6.18148	46.3328	6.04485	45.7468	6.92084	46.5415	6.24347	53.0108	6.5996	46.6049	5.77567
CalStd	100 ppb			77.8748	8.51244	92.6972	6.52949	77.9642	10.5291	116.53	6.59807	88.3652	6.9336	92.7732	5.57858	93.5938	5.39076	91.091	5.3715	94.3336	5.75553	107.269	6.18583	92.5668	6.92528
CalStd	200 ppb			218.834	1.98798	205.128	0.757709	217.13	3.06435	193.649	0.767504	207.894	1.5308	204.269	1.74517	203.774	1.55801	205.247	0.260909	203.355	1.17662	195.503	2.18827	204.784	1.40807
Sample	mamta 1	40	0.3525	440.797	8.27848	5236.7	1.96291	16322.6	2.59227	12554.8	3.16332	148.849	0.64849	38.0898	1.27214	95.6383	0.488266	303.986	0.270449	32.2728	0.679825	142.495	0.763817	0.600718	30.1192
Sample	mamta 2	40	0.4371	373.494	1.10092	6610.26	0.580062	21086.9	0.268198	15474.4	0.755327	165.635	0.672403	9.47462	0.635669	121.165	0.6082	186.93	0.312155	38.9459	0.542543	188.789	1.09365	0.27726	27.538
Sample	mamta 3	40	0.3965	202.933	1.90554	5648.83	1.06467	17443.7	1.36005	13731.7	1.78766	113.459	2.79903	8.52532	1.01218	85.8132	1.3524	131.275	1.17434	43.8081	1.16294	198.09	0.53232	2.65991e-17	7.96055e+16
				General Formula for [Conc. in ug/mg] = [Conc. in ppb] / (Sample Weight/Sample Volume *1000000))

## Sheet: Sheet2
			23 Na [ He ]	24 Mg [ He ]	31 P [ He ]	39 K [ He ]	43 Ca [ He ]	52 Cr [ He ]	55 Mn [ He ]	56 Fe [ He ]	63 Cu [ He ]	66 Zn [ He ]	78 Se [ He ]
Sample Name	Dilution (ml)	Vial Number (gm)	Conc. [ ppb ]	Conc. [ ppb ]	Conc. [ ppb ]	Conc. [ ppb ]	Conc. [ ppb ]	Conc. [ ppb ]	Conc. [ ppb ]	Conc. [ ppb ]	Conc. [ ppb ]	Conc. [ ppb ]	Conc. [ ppb ]
N22	40	0.3525	440.797	5236.7	16322.6	12554.8	148.849	38.0898	95.6383	303.986	32.2728	142.495	0.600718
M-507	40	0.4371	373.494	6610.26	21086.9	15474.4	165.635	9.47462	121.165	186.93	38.9459	188.789	0.27726
(ug/mg)	Na	Mg	P	K	Ca	Cr	Mn	Fe	Cu	Zn	Se
N22	0.0500195	0.594235	1.85221	1.42466	0.0168907	0.00432224	0.0108526	0.0344949	0.00366216	0.0161697	6.81665e-05
M-507	0.0341793	0.60492	1.9297	1.4161	0.0151576	0.000867043	0.0110881	0.0171064	0.00356403	0.0172765	2.53727e-05

## Sheet: Figure_15
Table s12. List of minerals in N22 and M-507 rice.
(ug/mg)	Na	Mg	P	K	Ca	Cr	Mn	Fe	Cu	Zn	Se		Mineral (ug/g)	N22	M-507
N22	0.0500195	0.594235	1.85221	1.42466	0.0168907	0.00432224	0.0108526	0.0344949	0.00366216	0.0161697	6.81665e-05		Na	50.0195	34.1793
M-507	0.0341793	0.60492	1.9297	1.4161	0.0151576	0.000867043	0.0110881	0.0171064	0.00356403	0.0172765	2.53727e-05		Mg	594.235	604.92
													P	1852.21	1929.7
(mg/kg)	Na	Mg	P	K	Ca	Cr	Mn	Fe	Cu	Zn	Se		K	1424.66	1416.1
N22	50.0195	594.235	1852.21	1424.66	16.8907	4.32224	10.8526	34.4949	3.66216	16.1697	0.0682		Ca	16.8907	15.1576
M-507	34.1793	604.92	1929.7	1416.1	15.1576	0.867043	11.0881	17.1064	3.56403	17.2765	0.0254		Cr	4.32224	0.867043
													Mn	10.8526	11.0881
ug/g	Na	Mg	P	K	Ca	Cr	Mn	Fe	Cu	Zn	Se		Fe	34.4949	17.1064
N22	50.0195	594.235	1852.21	1424.66	16.8907	4.32224	10.8526	34.4949	3.66216	16.1697	0.0682		Cu	3.66216	3.56403
M-507	34.1793	604.92	1929.7	1416.1	15.1576	0.867043	11.0881	17.1064	3.56403	17.2765	0.0254		Zn	16.1697	17.2765
													Se	0.0682	0.0254
(g/kg)	Na	Mg	P	K	Ca	Cr	Mn	Fe	Cu	Zn	Se
N22	0.0500195	0.594235	1.85221	1.42466	0.0168907	0.00432224	0.0108526	0.0344949	0.00366216	0.0161697	6.81665e-05
M-507	0.0341793	0.60492	1.9297	1.4161	0.0151576	0.000867043	0.0110881	0.0171064	0.00356403	0.0172765	2.53727e-05
Cr	Ca
Cu	K
Fe	Mg
Mn	P
Na
Se
Zn

## Sheet: Up
K	LOC_Os04g32920		K00799	K00799 GST, gst; glutathione S-transferase	LOC_Os01g70770.1,LOC_Os01g72170.1,LOC_Os10g38360.1,LOC_Os10g38489.1
P	LOC_Os03g05620		K03320	K03320 amt, AMT, MEP; ammonium transporter, Amt family	LOC_Os01g61510.1
Fe	LOC_Os02g36940		K03549	K03549 kup; KUP system potassium uptake protein	LOC_Os04g32920.1,LOC_Os04g32920.2,LOC_Os04g32920.3,LOC_Os04g32920.4,LOC_Os04g32920.5
Zn	LOC_Os11g36200		K05658	K05658 ABCB1, CD243; ATP-binding cassette, subfamily B (MD…	LOC_Os01g18670.1
			K08176	K08176 PHO84; MFS transporter, PHS family, inorganic phosp…	LOC_Os03g05620.1
			K08360	K08360 CYB561; transmembrane ascorbate-dependent reductase […	LOC_Os04g45090.1,LOC_Os04g45090.2
			K08711	K08711 PDR, CDR1; ATP-binding cassette, subfamily G (WHITE…	LOC_Os01g42410.1,LOC_Os08g29570.1
			K14207	K14207 SLC38A2, SNAT2; solute carrier family 38 (sodium-coup…	LOC_Os02g09810.1,LOC_Os02g09810.2,LOC_Os02g09810.3
			K14209	K14209 SLC36A, PAT; solute carrier family 36 (proton-coupled…	LOC_Os02g44980.1,LOC_Os03g60260.1,LOC_Os04g47780.1
			K14638	K14638 SLC15A3_4, PHT; solute carrier family 15 (peptide/his…	LOC_Os04g59480.1,LOC_Os05g35650.1,LOC_Os05g35650.2,LOC_Os06g15370.1,LOC_Os06g49250.1,LOC_Os06g49250.2,LOC_Os06g49250.3,LOC_Os06g49250.4,LOC_Os06g49250.5
			K15015	K15015 SLC32A, VGAT; solute carrier family 32 (vesicular inh…	LOC_Os04g38680.1
			K15382	K15382 SLC50A, SWEET; solute carrier family 50 (sugar transp…	LOC_Os01g36070.1,LOC_Os11g31190.1
			K20858	K20858 MCU; calcium uniporter protein, mitochondrial	LOC_Os06g09260.1
			K21867	K21867 AKT, KAT, GORK, SKOR; potassium channel	LOC_Os01g52070.1
			K22139	K22139 MPC2; mitochondrial pyruvate carrier 2	LOC_Os07g36800.1,LOC_Os07g36800.2
			K24139	K24139 PILS, ECM3; auxin efflux carrier family protein	LOC_Os09g31478.1,LOC_Os09g31478.2
			K24193	K24193 STP; MFS transporter, SP family, sugar:H+ symporter	LOC_Os02g36440.1,LOC_Os02g36450.1,LOC_Os02g36450.2,LOC_Os07g37320.1

## Sheet: Down
Fe	Mn		K03327	K03327 TC.MATE, SLC47A, norM, mdtK, dinF; multidrug resistance protein, MATE family	LOC_Os03g08900.1
LOC_Os01g49470	LOC_Os03g12530		K05658	K05658 ABCB1, CD243; ATP-binding cassette, subfamily B (MDR/TAP), member 1 [EC:7.6.2.2]	LOC_Os01g50080.1
LOC_Os01g72370	LOC_Os06g34120		K14709	K14709 SLC39A1_2_3, ZIP1_2_3; solute carrier family 39 (zinc transporter), member 1/2/3	LOC_Os03g46454.1
LOC_Os03g26210			K15015	K15015 SLC32A, VGAT; solute carrier family 32 (vesicular inhibitory amino acid transporter)	LOC_Os04g12499.1
LOC_Os03g46454			K17469	K17469 SULTR2; sulfate transporter 2, low-affinity	LOC_Os03g09930.1,LOC_Os03g09930.2
LOC_Os03g54000			K24976	K24976 TRK, HKT; Trk/Ktr/HKT type cation transporter	LOC_Os02g07830.1
LOC_Os05g47780
LOC_Os07g15460
