# Supplementary material for: RNA-Seq, co-expression network and eQTL analysis identify key genes for chlorophyll and carbon metabolism in rice
Source: Research Square preprint supplement (doi:10.21203/rs.3.rs-2517802/v1), 2023-02-08
Supplement: Supplementary file 1 [file e21890ff9ea5dc727f882ee6.docx]

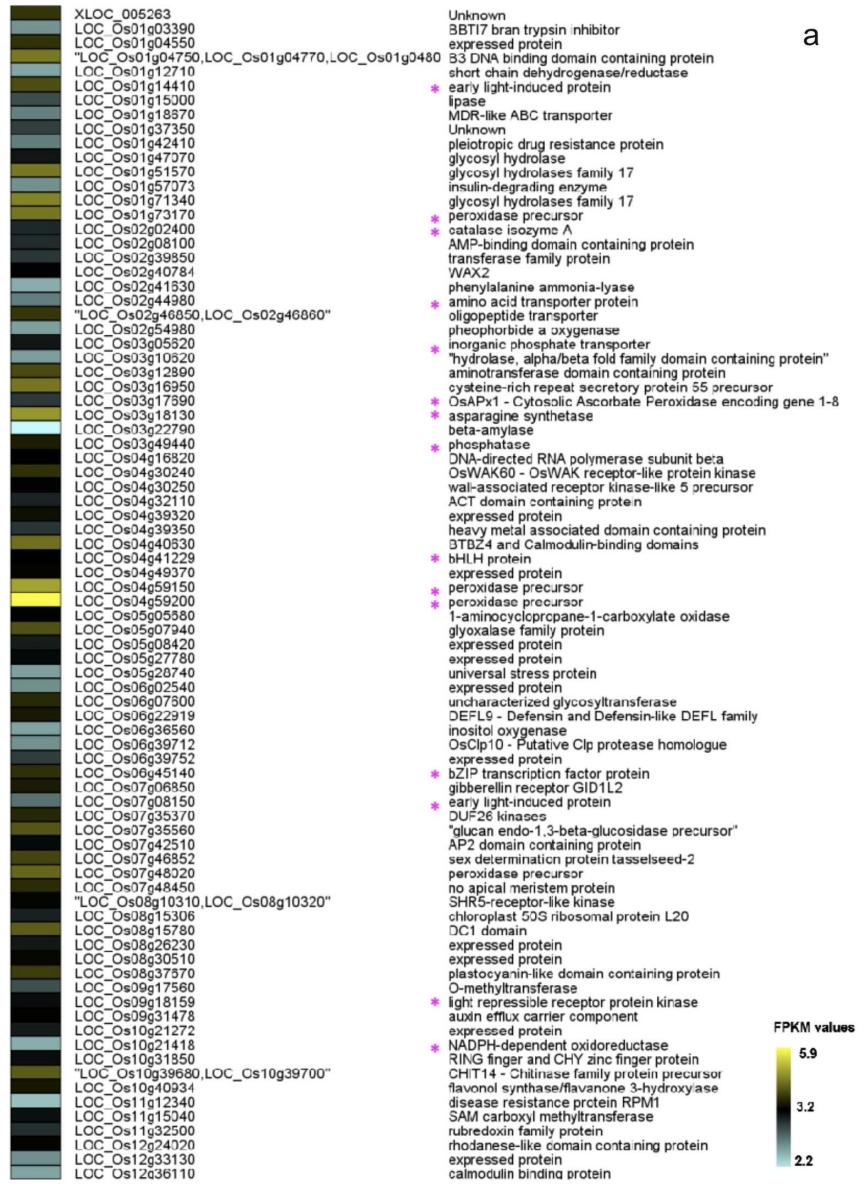


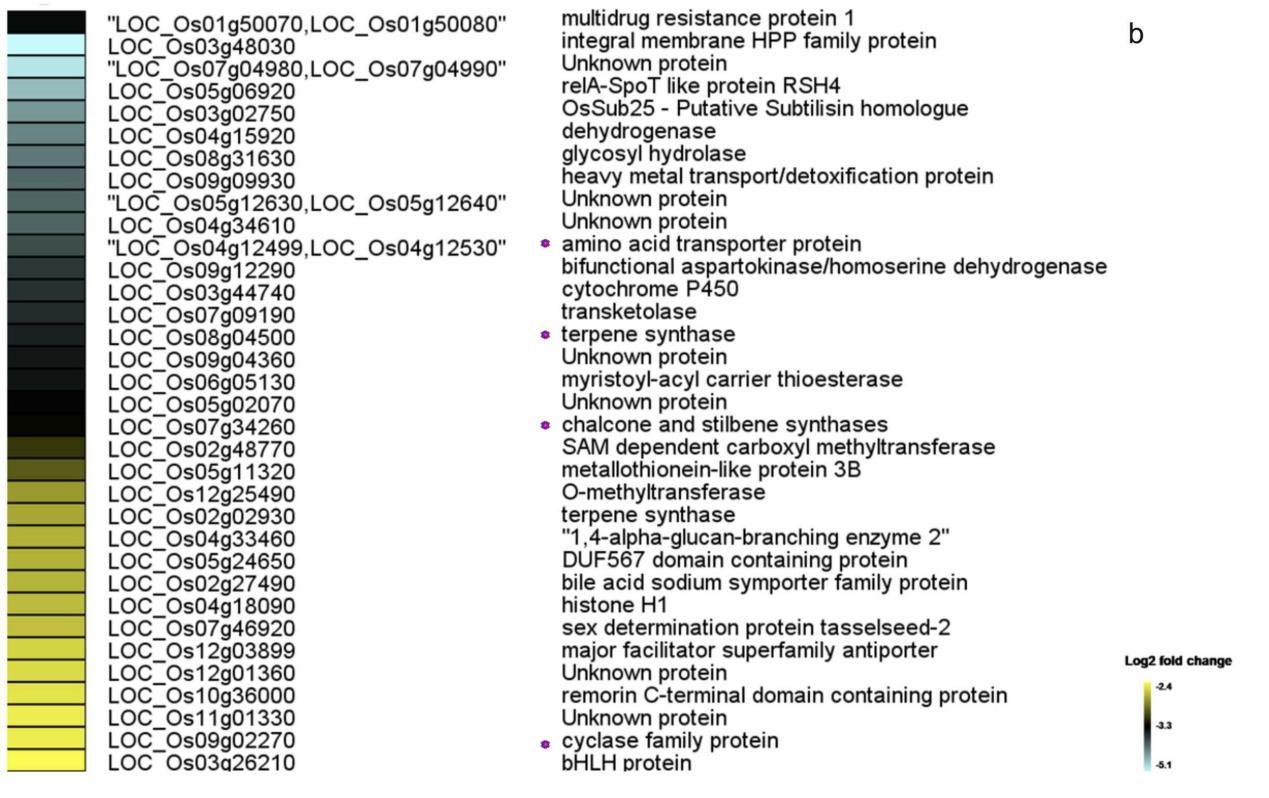


**Figure s1.** Heatmap showing the expression profiles of significantly (**a**) up- and (**b**)down-regulated DEGs in N22 vs. M-507. Color bars show the corresponding scale for log2 fold change in expression.


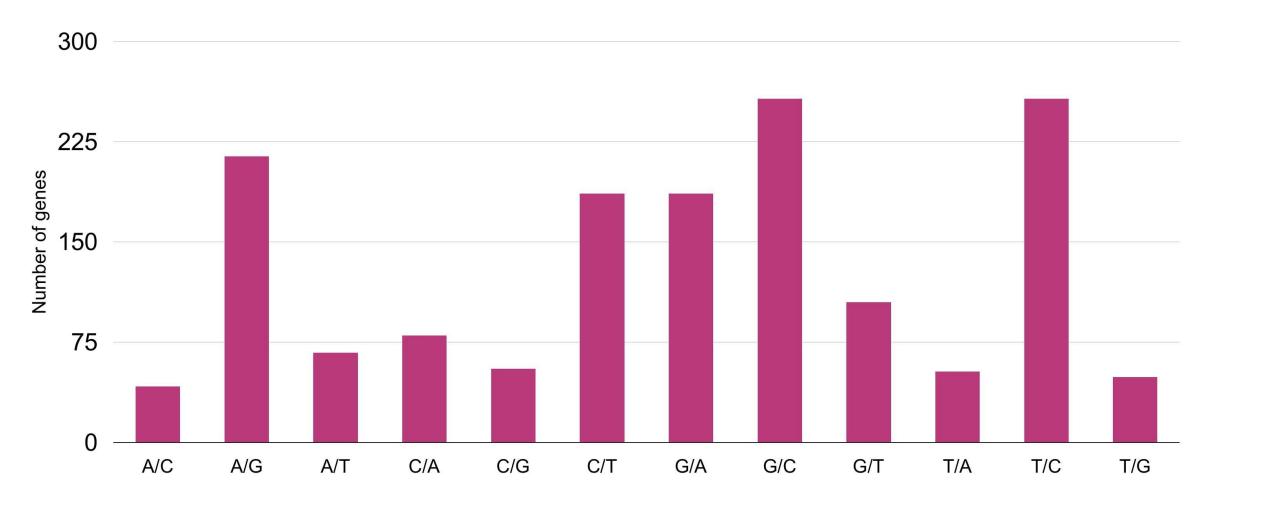


**Figure s2.** Total number of SNPs detected for N22 and M-507.
