# Supplementary material for: RNA-Seq, co-expression network and eQTL analysis identify key genes for chlorophyll and carbon metabolism in rice
Source: Research Square preprint supplement (doi:10.21203/rs.3.rs-2517802/v1), 2023-02-08
Supplement: Supplementary file 2 [file 1786e191c86c9ed0b80ca573.xlsx]

## Sheet: Up_DEG
test_id	gene_id	gene	locus	N22_FPKM_Value	M-507_FPKM_Value	log2(fold_change)	test_stat	p_value	q_value	significant	description(phytozome)	GO_ID	GO_Ontology	GO_Term	GO_TAIR_ID	PFAM_hmm_acc	PFAM_hmm_name	PFAM_hmm_type	INTERPRO_ipr_acc	INTERPRO_ipr_desc	INTERPRO_ipr_go	Entry(uniprot)	Cross-reference(GeneID)	Cross-reference(RefSeq)	Cross-reference(KEGG)	Query_sequence_Id(OryzaCyc)	Pathway-id(OryzaCyc)	Pathway-name(OryzaCyc)	Reaction-id(OryzaCyc)	EC(OryzaCyc)	Protein-id(OryzaCyc)	Protein-name(OryzaCyc)	Gene-id(OryzaCyc)	Gene-name(OryzaCyc)
XLOC_000102	XLOC_000102	LOC_Os01g02810	Chr1:987590-990647	0.935306	3.7917	2.01934	2.1475	0.04545	0.587279	no	resistance-related receptor-like kinase, putative, expressed	GO:0005623; GO:0008152; GO:0009987; GO:0016301; GO:0006464	cellular_component; biological_process; biological_process; molecular_function; biological_process	cell; metabolic process; cellular process; kinase activity; protein modification process	TAIR:AT5G38260; TAIR:AT5G38260; TAIR:AT5G38260; TAIR:AT5G38260; TAIR:AT5G38260	PF07714.10	Pkinase_Tyr	Domain	N/A	N/A	N/A	NA	NA	NA	NA	LOC_Os01g02810	PWY-6952	glycerophosphodiester degradation	GLYCPDIESTER-RXN	EC-3.1.4.46	GN7F-17150-MONOMER	glycerophosphodiester phosphodiesterase	GN7F-17150	LOC_Os08g24630.1
XLOC_000169	XLOC_000169	LOC_Os01g04280	Chr1:1895356-1941953	1.01352	10.6884	3.3986	2.01643	0.01495	0.342658	no	calmodulin binding protein, putative, expressed	GO:0005575; GO:0005515; GO:0008150	cellular_component; molecular_function; biological_process	cellular_component; protein binding; biological_process	TAIR:AT5G57580; TAIR:AT5G57580; TAIR:AT5G57580	PF07887.4	Calmodulin_bind	Family	IPR012416	Calmodulin binding protein-like	N/A	NA	NA	NA	NA	LOC_Os01g04280	NA	NA	NA	NA	NA	NA	NA	NA
XLOC_000179	XLOC_000179	LOC_Os01g04530,LOC_Os01g04540	Chr1:2021310-2032231	8.52709	63.0831	2.88713	2.69683	0.0036	0.166906	no	expressed protein	GO:0008152; GO:0009987; GO:0016301; GO:0000166; GO:0006464; GO:0005886	biological_process; biological_process; molecular_function; molecular_function; biological_process; cellular_component	metabolic process; cellular process; kinase activity; nucleotide binding; protein modification process; plasma membrane	TAIR:AT1G18390; TAIR:AT1G18390; TAIR:AT1G18390; TAIR:AT1G18390; TAIR:AT1G18390; TAIR:AT1G18390	NA	NA	NA	N/A	N/A	N/A	NA	NA	NA	NA	LOC_Os01g04530	NA	NA	NA	NA	NA	NA	NA	NA
XLOC_000180	XLOC_000180	LOC_Os01g04550	Chr1:2036117-2038280	4.77677	68.7669	3.84761	5.39529	5e-05	0.0117035	yes	expressed protein	GO:0005975; GO:0009987; GO:0008152; GO:0006950; GO:0016301; GO:0016787	biological_process; biological_process; biological_process; biological_process; molecular_function; molecular_function	carbohydrate metabolic process; cellular process; metabolic process; response to stress; kinase activity; hydrolase activity	TAIR:AT1G66980; TAIR:AT1G66980; TAIR:AT1G66980; TAIR:AT1G66980; TAIR:AT1G66980; TAIR:AT1G66980	PF07714.10	Pkinase_Tyr	Domain	IPR008271	Serine/threonine-protein kinase, active site	Molecular Function: protein serine/threonine kinase activity (GO:0004674), Biological Process: protein amino acid phosphorylation (GO:0006468)	NA	NA	NA	NA	LOC_Os01g04550	PWY-6952	glycerophosphodiester degradation	GLYCPDIESTER-RXN	EC-3.1.4.46	GN7F-23449-MONOMER	glycerophosphodiester phosphodiesterase	GN7F-23449	LOC_Os01g02460.1
XLOC_000193	XLOC_000193	LOC_Os01g04750,LOC_Os01g04770,LOC_Os01g04800	Chr1:2154325-2205091	2.16477	52.3437	4.59573	5.83757	0.00015	0.0255145	yes	B3 DNA binding domain containing protein, expressed	GO:0009058; GO:0006139; GO:0003677; GO:0003700; GO:0009536	biological_process; biological_process; molecular_function; molecular_function; cellular_component	biosynthetic process; nucleobase, nucleoside, nucleotide and nucleic acid metabolic process; DNA binding; sequence-specific DNA binding transcription factor activity; plastid	TAIR:AT1G68840; TAIR:AT1G68840; TAIR:AT1G68840; TAIR:AT1G68840; TAIR:AT1G68840	PF02362.14	B3	Family	IPR016177	DNA-binding, integrase-type	Molecular Function: DNA binding (GO:0003677)	Q9AWS7	NA	NA	NA	LOC_Os01g04750	NA	NA	NA	NA	NA	NA	NA	NA
XLOC_000291	XLOC_000291	LOC_Os01g06640	Chr1:3128991-3130722	1.55051	6.7426	2.12056	2.25832	0.03945	0.554699	no	basic helix-loop-helix, putative, expressed	GO:0003677; GO:0005634; GO:0009058; GO:0006139; GO:0003700; GO:0003677; GO:0005634; GO:0009058; GO:0006139; GO:0003700; GO:0003677; GO:0005634; GO:0009058; GO:0006139; GO:0003700	molecular_function; cellular_component; biological_process; biological_process; molecular_function; molecular_function; cellular_component; biological_process; biological_process; molecular_function; molecular_function; cellular_component; biological_process; biological_process; molecular_function	DNA binding; nucleus; biosynthetic process; nucleobase, nucleoside, nucleotide and nucleic acid metabolic process; sequence-specific DNA binding transcription factor activity; DNA binding; nucleus; biosynthetic process; nucleobase, nucleoside, nucleotide and nucleic acid metabolic process; sequence-specific DNA binding transcription factor activity; DNA binding; nucleus; biosynthetic process; nuc…	TAIR:AT1G68810; TAIR:AT1G68810; TAIR:AT1G68810; TAIR:AT1G68810; TAIR:AT1G68810; TAIR:AT1G68810; TAIR:AT1G68810; TAIR:AT1G68810; TAIR:AT1G68810; TAIR:AT1G68810; TAIR:AT2G40200; TAIR:AT2G40200; TAIR:AT2G40200; TAIR:AT2G40200; TAIR:AT2G40200	PF00010.19	HLH	Domain	IPR011598	Helix-loop-helix DNA-binding	Cellular Component: nucleus (GO:0005634), Molecular Function: transcription regulator activity (GO:0030528), Biological Process: regulation of transcription (GO:0045449)	NA	NA	NA	NA	LOC_Os01g06640	NA	NA	NA	NA	NA	NA	NA	NA
XLOC_000391	XLOC_000391	LOC_Os01g09010	Chr1:4527985-4532893	4.81952	19.5389	2.01939	2.96842	0.0057	0.207952	no	transferase family protein, putative, expressed	GO:0005575; GO:0008152; GO:0016740; GO:0008150	cellular_component; biological_process; molecular_function; biological_process	cellular_component; metabolic process; transferase activity; biological_process	TAIR:AT3G62160; TAIR:AT3G62160; TAIR:AT3G62160; TAIR:AT3G62160	PF02458.8	Transferase	Family	N/A	N/A	N/A	NA	NA	NA	NA	LOC_Os01g09010	NA	NA	NA	NA	NA	NA	NA	NA
XLOC_000476	XLOC_000476	LOC_Os01g10990	Chr1:5861815-5863794	0.470853	3.15788	2.74561	2.45513	0.04585	0.587707	no	integral membrane protein DUF6 containing protein, expressed	GO:0003674; GO:0016020	molecular_function; cellular_component	molecular_function; membrane	TAIR:AT5G64700; TAIR:AT5G64700	PF00892.13	EamA	Family	N/A	N/A	N/A	NA	NA	NA	NA	LOC_Os01g10990	NA	NA	NA	NA	NA	NA	NA	NA
XLOC_000554	XLOC_000554	LOC_Os01g12710	Chr1:7024296-7030610	9.38923	57.0963	2.60432	3.99329	0.0004	0.0465055	yes	oxidoreductase, short chain dehydrogenase/reductase family domain containing protein, expressed	GO:0019538; GO:0009056; GO:0009987; GO:0003824; GO:0008152; GO:0009536; GO:0019538; GO:0009056; GO:0009987; GO:0003824; GO:0008152; GO:0009536	biological_process; biological_process; biological_process; molecular_function; biological_process; cellular_component; biological_process; biological_process; biological_process; molecular_function; biological_process; cellular_component	protein metabolic process; catabolic process; cellular process; catalytic activity; metabolic process; plastid; protein metabolic process; catabolic process; cellular process; catalytic activity; metabolic process; plastid	TAIR:AT4G13250; TAIR:AT4G13250; TAIR:AT4G13250; TAIR:AT4G13250; TAIR:AT4G13250; TAIR:AT4G13250; TAIR:AT4G13250; TAIR:AT4G13250; TAIR:AT4G13250; TAIR:AT4G13250; TAIR:AT4G13250; TAIR:AT4G13250	PF00106.18	adh_short	Domain	N/A	N/A	N/A	Q5N800	4327178;	NP_001042468.1;	osa:4327178;	LOC_Os01g12710	NA	NA	NA	NA	NA	NA	NA	NA
XLOC_000559	XLOC_000559	LOC_Os01g12760,LOC_Os01g12770	Chr1:7061343-7073955	6.77304	37.7669	2.47925	3.7582	0.0005	0.0524802	no	cytochrome P450, putative, expressed	GO:0005623; GO:0003674; GO:0005488; GO:0003824; GO:0008152; GO:0019825	cellular_component; molecular_function; molecular_function; molecular_function; biological_process; molecular_function	cell; molecular_function; binding; catalytic activity; metabolic process; oxygen binding	TAIR:AT5G24960; TAIR:AT5G24960; TAIR:AT5G24960; TAIR:AT5G24960; TAIR:AT5G24960; TAIR:AT5G24960	PF00067.15	p450	Domain	IPR001128	Cytochrome P450	Molecular Function: monooxygenase activity (GO:0004497), Molecular Function: iron ion binding (GO:0005506), Molecular Function: electron carrier activity (GO:0009055), Molecular Function: heme binding (GO:0020037)	NA	NA	NA	NA	LOC_Os01g12760	PWY-6540	costunolide biosynthesis	RXN-8971	EC-1.14.13.120	GN7F-26087-MONOMER	costunolide synthase	GN7F-26087	LOC_Os06g43440.1
XLOC_000636	XLOC_000636	LOC_Os01g14410	Chr1:8061857-8062908	7.55367	132.226	4.12968	5.74759	5e-05	0.0117035	yes	early light-induced protein, chloroplast precursor, putative, expressed	GO:0009628; GO:0006950; GO:0005488	biological_process; biological_process; molecular_function	response to abiotic stimulus; response to stress; binding	TAIR:AT3G22840; TAIR:AT3G22840; TAIR:AT3G22840	PF00504.14	Chloroa_b-bind	Family	N/A	N/A	N/A	NA	NA	NA	NA	LOC_Os01g14410	NA	NA	NA	NA	NA	NA	NA	NA
XLOC_000660	XLOC_000660	LOC_Os01g15000	Chr1:8404246-8408377	7.86642	61.2748	2.96151	4.43061	5e-05	0.0117035	yes	lipase, putative, expressed	GO:0016787; GO:0006629	molecular_function; biological_process	hydrolase activity; lipid metabolic process	TAIR:AT1G02660; TAIR:AT1G02660	PF01764.18	Lipase_3	Family	N/A	N/A	N/A	NA	NA	NA	NA	LOC_Os01g15000	NA	NA	NA	NA	NA	NA	NA	NA
XLOC_000679	XLOC_000679	LOC_Os01g15530	Chr1:8729004-8735346	0.835104	4.01213	2.26434	3.04468	0.0043	0.183296	no	tetratricopeptide-like helical, putative, expressed	GO:0003674; GO:0005575; GO:0008150	molecular_function; cellular_component; biological_process	molecular_function; cellular_component; biological_process	TAIR:AT5G56310; TAIR:AT5G56310; TAIR:AT5G56310	PF01535.13	PPR	Family	IPR002885	Pentatricopeptide repeat	N/A	NA	NA	NA	NA	LOC_Os01g15530	NA	NA	NA	NA	NA	NA	NA	NA
XLOC_000680	XLOC_000680	LOC_Os01g15540	Chr1:8735983-8744575	0.664853	3.01069	2.17899	2.61892	0.01765	0.377399	no	kinesin motor domain containing protein, putative, expressed	GO:0009987; GO:0008152; GO:0000166; GO:0003774; GO:0005739	biological_process; biological_process; molecular_function; molecular_function; cellular_component	cellular process; metabolic process; nucleotide binding; motor activity; mitochondrion	TAIR:AT1G55550; TAIR:AT1G55550; TAIR:AT1G55550; TAIR:AT1G55550; TAIR:AT1G55550	PF00225.16	Kinesin	Domain	IPR001752	Kinesin, motor domain	Molecular Function: microtubule motor activity (GO:0003777), Molecular Function: ATP binding (GO:0005524), Biological Process: microtubule-based movement (GO:0007018)	NA	NA	NA	NA	LOC_Os01g15540	NA	NA	NA	NA	NA	NA	NA	NA
XLOC_000809	XLOC_000809	LOC_Os01g18584	Chr1:10470539-10479020	1.23948	7.73268	2.64123	3.02933	0.0091	0.265668	no	WRKY9, expressed	GO:0009058; GO:0006139; GO:0003700	biological_process; biological_process; molecular_function	biosynthetic process; nucleobase, nucleoside, nucleotide and nucleic acid metabolic process; sequence-specific DNA binding transcription factor activity	TAIR:AT4G04450; TAIR:AT4G04450; TAIR:AT4G04450	PF03106.8	WRKY	Domain	IPR003657	DNA-binding WRKY	Molecular Function: transcription factor activity (GO:0003700), Molecular Function: sequence-specific DNA binding (GO:0043565), Biological Process: regulation of transcription (GO:0045449)	NA	NA	NA	NA	LOC_Os01g18584	NA	NA	NA	NA	NA	NA	NA	NA
XLOC_000860	XLOC_000860	LOC_Os01g19820	Chr1:11245196-11246883	3.52928	14.2266	2.01115	2.41508	0.02005	0.39949	no	universal stress protein domain containing protein, putative, expressed	GO:0003674; GO:0006950; GO:0005773; GO:0003674; GO:0006950; GO:0005773; GO:0003674; GO:0006950; GO:0005773; GO:0003674; GO:0006950; GO:0005773	molecular_function; biological_process; cellular_component; molecular_function; biological_process; cellular_component; molecular_function; biological_process; cellular_component; molecular_function; biological_process; cellular_component	molecular_function; response to stress; vacuole; molecular_function; response to stress; vacuole; molecular_function; response to stress; vacuole; molecular_function; response to stress; vacuole	TAIR:AT3G62550; TAIR:AT3G62550; TAIR:AT3G62550; TAIR:AT3G62550; TAIR:AT3G62550; TAIR:AT3G62550; TAIR:AT3G62550; TAIR:AT3G62550; TAIR:AT3G62550; TAIR:AT3G62550; TAIR:AT3G62550; TAIR:AT3G62550	PF00582.19	Usp	Domain	N/A	N/A	N/A	NA	NA	NA	NA	LOC_Os01g19820	NA	NA	NA	NA	NA	NA	NA	NA
XLOC_000955	XLOC_000955	LOC_Os01g22249,LOC_Os01g22270	Chr1:12509591-12549245	0.973163	35.1205	5.17349	5.54906	0.008	0.247052	no	peroxidase precursor, putative, expressed	GO:0005783; GO:0005515; GO:0006950; GO:0009628; GO:0003824; GO:0008152	cellular_component; molecular_function; biological_process; biological_process; molecular_function; biological_process	endoplasmic reticulum; protein binding; response to stress; response to abiotic stimulus; catalytic activity; metabolic process	TAIR:AT1G05260; TAIR:AT1G05260; TAIR:AT1G05260; TAIR:AT1G05260; TAIR:AT1G05260; TAIR:AT1G05260	PF00141.16	peroxidase	Family	N/A	N/A	N/A	NA	NA	NA	NA	LOC_Os01g22249	NA	NA	NA	NA	NA	NA	NA	NA
XLOC_000961	XLOC_000961	LOC_Os01g22370	Chr1:12578188-12582301	0.399589	3.90641	3.28925	2.85125	0.0458	0.587493	no	peroxidase precursor, putative, expressed	GO:0005783; GO:0005515; GO:0006950; GO:0009628; GO:0003824; GO:0008152	cellular_component; molecular_function; biological_process; biological_process; molecular_function; biological_process	endoplasmic reticulum; protein binding; response to stress; response to abiotic stimulus; catalytic activity; metabolic process	TAIR:AT1G05260; TAIR:AT1G05260; TAIR:AT1G05260; TAIR:AT1G05260; TAIR:AT1G05260; TAIR:AT1G05260	PF00141.16	peroxidase	Family	IPR000823	Plant peroxidase	Molecular Function: peroxidase activity (GO:0004601), Biological Process: response to oxidative stress (GO:0006979), Molecular Function: heme binding (GO:0020037), Biological Process: oxidation reduction (GO:0055114)	NA	NA	NA	NA	LOC_Os01g22370	NA	NA	NA	NA	NA	NA	NA	NA
XLOC_000985	XLOC_000985	LOC_Os01g22900	Chr1:12870173-12874264	41.4685	187.291	2.1752	3.02131	0.00335	0.159797	no	neutral/alkaline invertase, putative, expressed	GO:0008152; GO:0016787; GO:0003824; GO:0007275; GO:0006950; GO:0005739; GO:0008150; GO:0008152; GO:0016787; GO:0003824; GO:0007275; GO:0006950; GO:0005739; GO:0008150; GO:0008152; GO:0016787; GO:0003824; GO:0007275; GO:0006950; GO:0005739; GO:0008150	biological_process; molecular_function; molecular_function; biological_process; biological_process; cellular_component; biological_process; biological_process; molecular_function; molecular_function; biological_process; biological_process; cellular_component; biological_process; biological_process; molecular_function; molecular_function; biological_process; biological_process; cellular_component;…	metabolic process; hydrolase activity; catalytic activity; multicellular organismal development; response to stress; mitochondrion; biological_process; metabolic process; hydrolase activity; catalytic activity; multicellular organismal development; response to stress; mitochondrion; biological_process; metabolic process; hydrolase activity; catalytic activity; multicellular organismal development…	TAIR:AT1G56560; TAIR:AT1G56560; TAIR:AT1G56560; TAIR:AT1G56560; TAIR:AT1G56560; TAIR:AT1G56560; TAIR:AT1G56560; TAIR:AT1G56560; TAIR:AT1G56560; TAIR:AT1G56560; TAIR:AT1G56560; TAIR:AT1G56560; TAIR:AT1G56560; TAIR:AT1G56560; TAIR:AT1G56560; TAIR:AT1G56560; TAIR:AT1G56560; TAIR:AT1G56560; TAIR:AT1G56560; TAIR:AT1G56560; TAIR:AT1G56560	PF04853.5	Invertase_neut	Family	N/A	N/A	N/A	NA	NA	NA	NA	LOC_Os01g22900	NA	NA	NA	NA	NA	NA	NA	NA
XLOC_001231	XLOC_001231	LOC_Os01g28450	Chr1:15934490-15935319	1.45411	10.4493	2.8452	2.8353	0.0229	0.427909	no	SCP-like extracellular protein, expressed	GO:0003674; GO:0005618; GO:0006950; GO:0005576; GO:0009719; GO:0009607; GO:0009991	molecular_function; cellular_component; biological_process; cellular_component; biological_process; biological_process; biological_process	molecular_function; cell wall; response to stress; extracellular region; response to endogenous stimulus; response to biotic stimulus; response to extracellular stimulus	TAIR:AT2G14610; TAIR:AT2G14610; TAIR:AT2G14610; TAIR:AT2G14610; TAIR:AT2G14610; TAIR:AT2G14610; TAIR:AT2G14610	PF00188.19	CAP	Domain	IPR014044	SCP-like extracellular	N/A	NA	NA	NA	NA	LOC_Os01g28450	NA	NA	NA	NA	NA	NA	NA	NA
XLOC_001250	XLOC_001250	LOC_Os01g28790	Chr1:16130514-16131447	2.31644	26.4388	3.51267	4.05907	0.00345	0.163097	no	PRAS-rich protein, putative, expressed	NA	NA	NA	NA	NA	NA	NA	N/A	N/A	N/A	NA	NA	NA	NA	LOC_Os01g28790	NA	NA	NA	NA	NA	NA	NA	NA
XLOC_001274	XLOC_001274	LOC_Os01g29330	Chr1:16435855-16436845	1.57177	15.2146	3.27499	3.5139	0.0136	0.324804	no	expressed protein	GO:0003674; GO:0005783; GO:0008150	molecular_function; cellular_component; biological_process	molecular_function; endoplasmic reticulum; biological_process	TAIR:AT4G24310; TAIR:AT4G24310; TAIR:AT4G24310	PF05078.5	DUF679	Family	IPR007770	Protein of unknown function DUF679	N/A	NA	NA	NA	NA	LOC_Os01g29330	NA	NA	NA	NA	NA	NA	NA	NA
XLOC_001545	XLOC_001545	LOC_Os01g36070	Chr1:19959666-19961992	1.93003	10.0999	2.38765	2.77478	0.0171	0.37119	no	nodulin MtN3 family protein, putative, expressed	GO:0016020; GO:0006810; GO:0009987; GO:0005215; GO:0003674; GO:0005623; GO:0005886; GO:0008150	cellular_component; biological_process; biological_process; molecular_function; molecular_function; cellular_component; cellular_component; biological_process	membrane; transport; cellular process; transporter activity; molecular_function; cell; plasma membrane; biological_process	TAIR:AT3G14770; TAIR:AT3G14770; TAIR:AT3G14770; TAIR:AT3G14770; TAIR:AT3G14770; TAIR:AT3G14770; TAIR:AT3G14770; TAIR:AT3G14770	PF03083.9	MtN3_slv	Family	IPR018169	MtN3/saliva-related transmembrane protein, conserved region	Cellular Component: membrane (GO:0016020)	Q5JJY5	4326868;	NP_001043270.1;	osa:4326868;	LOC_Os01g36070	NA	NA	NA	NA	NA	NA	NA	NA
XLOC_001608	XLOC_001608	LOC_Os01g37350	Chr1:20849539-20860983	1.17648	9.5888	3.02688	4.27011	0.0004	0.0465055	yes	NA	NA	NA	NA	NA	PF00078.20	RVT_1	Family	N/A	N/A	N/A	NA	NA	NA	NA	LOC_Os01g37350	NA	NA	NA	NA	NA	NA	NA	NA
XLOC_001704	XLOC_001704	LOC_Os01g39330	Chr1:22138042-22142486	0.516114	3.32592	2.68799	2.64818	0.02965	0.486051	no	helix-loop-helix DNA-binding domain containing protein, expressed	GO:0003677; GO:0005634; GO:0008150; GO:0009058; GO:0006139; GO:0003700	molecular_function; cellular_component; biological_process; biological_process; biological_process; molecular_function	DNA binding; nucleus; biological_process; biosynthetic process; nucleobase, nucleoside, nucleotide and nucleic acid metabolic process; sequence-specific DNA binding transcription factor activity	TAIR:AT5G56960; TAIR:AT5G56960; TAIR:AT5G56960; TAIR:AT5G56960; TAIR:AT5G56960; TAIR:AT5G56960	PF00010.19	HLH	Domain	N/A	N/A	N/A	NA	NA	NA	NA	LOC_Os01g39330	NA	NA	NA	NA	NA	NA	NA	NA
XLOC_001804	XLOC_001804	LOC_Os01g41240	Chr1:23343305-23345461	2.29423	34.1763	3.89692	4.7389	0.001	0.0805175	no	hydrolase, alpha/beta fold family domain containing protein, expressed	GO:0005623; GO:0008152; GO:0016787; GO:0008150	cellular_component; biological_process; molecular_function; biological_process	cell; metabolic process; hydrolase activity; biological_process	TAIR:AT3G24420; TAIR:AT3G24420; TAIR:AT3G24420; TAIR:AT3G24420	PF00561.13	Abhydrolase_1	Domain	N/A	N/A	N/A	NA	NA	NA	NA	LOC_Os01g41240	NA	NA	NA	NA	NA	NA	NA	NA
XLOC_001885	XLOC_001885	LOC_Os01g42860	Chr1:24392840-24393423	6.2699	133.619	4.41354	5.34032	0.00065	0.0608584	no	inhibitor I family protein, putative, expressed	GO:0006950; GO:0005575; GO:0008152; GO:0030234	biological_process; cellular_component; biological_process; molecular_function	response to stress; cellular_component; metabolic process; enzyme regulator activity	TAIR:AT5G43580; TAIR:AT5G43580; TAIR:AT5G43580; TAIR:AT5G43580	PF00280.11	potato_inhibit	Domain	IPR000864	Proteinase inhibitor I13, potato inhibitor I	Molecular Function: serine-type endopeptidase inhibitor activity (GO:0004867), Biological Process: response to wounding (GO:0009611)	NA	NA	NA	NA	LOC_Os01g42860	NA	NA	NA	NA	NA	NA	NA	NA
XLOC_001926	XLOC_001926	LOC_Os01g43750	Chr1:25066170-25068299	1.0081	18.9897	4.23551	4.88425	0.0018	0.111238	no	cytochrome P450 72A1, putative, expressed	GO:0005623; GO:0003674; GO:0005488; GO:0003824; GO:0008152; GO:0019825	cellular_component; molecular_function; molecular_function; molecular_function; biological_process; molecular_function	cell; molecular_function; binding; catalytic activity; metabolic process; oxygen binding	TAIR:AT3G14690; TAIR:AT3G14690; TAIR:AT3G14690; TAIR:AT3G14690; TAIR:AT3G14690; TAIR:AT3G14690	PF00067.15	p450	Domain	IPR001128	Cytochrome P450	Molecular Function: monooxygenase activity (GO:0004497), Molecular Function: iron ion binding (GO:0005506), Molecular Function: electron carrier activity (GO:0009055), Molecular Function: heme binding (GO:0020037)	NA	NA	NA	NA	LOC_Os01g43750	NA	NA	NA	NA	NA	NA	NA	NA
XLOC_001927	XLOC_001927	LOC_Os01g43760	Chr1:25070688-25072836	0.736783	7.80867	3.40576	3.36179	0.0067	0.224323	no	cytochrome P450 72A1, putative, expressed	GO:0005623; GO:0003674; GO:0005488; GO:0003824; GO:0008152; GO:0019825	cellular_component; molecular_function; molecular_function; molecular_function; biological_process; molecular_function	cell; molecular_function; binding; catalytic activity; metabolic process; oxygen binding	TAIR:AT3G14690; TAIR:AT3G14690; TAIR:AT3G14690; TAIR:AT3G14690; TAIR:AT3G14690; TAIR:AT3G14690	PF00067.15	p450	Domain	N/A	N/A	N/A	NA	NA	NA	NA	LOC_Os01g43760	NA	NA	NA	NA	NA	NA	NA	NA
XLOC_002072	XLOC_002072	LOC_Os01g47070	Chr1:26885483-26886754	5.6117	51.2452	3.19091	4.48048	0.0002	0.0301425	yes	glycosyl hydrolase, putative, expressed	GO:0006950; GO:0008152; GO:0009628; GO:0003824; GO:0005623; GO:0005488; GO:0016787; GO:0009991; GO:0007154	biological_process; biological_process; biological_process; molecular_function; cellular_component; molecular_function; molecular_function; biological_process; biological_process	response to stress; metabolic process; response to abiotic stimulus; catalytic activity; cell; binding; hydrolase activity; response to extracellular stimulus; cell communication	TAIR:AT5G24090; TAIR:AT5G24090; TAIR:AT5G24090; TAIR:AT5G24090; TAIR:AT5G24090; TAIR:AT5G24090; TAIR:AT5G24090; TAIR:AT5G24090; TAIR:AT5G24090	PF00704.21	Glyco_hydro_18	Domain	N/A	N/A	N/A	NA	NA	NA	NA	LOC_Os01g47070	PWY-6902	chitin degradation II	3.2.1.14-RXN	EC-3.2.1.14	GN7F-24620-MONOMER	chitinase	GN7F-24620	LOC_Os06g25010.1
XLOC_002085	XLOC_002085	LOC_Os01g47330	Chr1:27041790-27044106	7.79421	32.5671	2.06294	2.8462	0.0095	0.271355	no	ribosomal protein L7/L12 C-terminal domain containing protein, expressed	GO:0016020; GO:0009536; GO:0009579; GO:0005840; GO:0006950; GO:0009607; GO:0006412; GO:0005198	cellular_component; cellular_component; cellular_component; cellular_component; biological_process; biological_process; biological_process; molecular_function	membrane; plastid; thylakoid; ribosome; response to stress; response to biotic stimulus; translation; structural molecule activity	TAIR:AT3G27850; TAIR:AT3G27850; TAIR:AT3G27850; TAIR:AT3G27850; TAIR:AT3G27850; TAIR:AT3G27850; TAIR:AT3G27850; TAIR:AT3G27850	PF00542.12	Ribosomal_L12	Domain	N/A	N/A	N/A	O22386	NA	NA	NA	LOC_Os01g47330	NA	NA	NA	NA	NA	NA	NA	NA
XLOC_002146	XLOC_002146	LOC_Os01g48610	Chr1:27868717-27871847	0.61461	3.3786	2.45868	2.76047	0.01695	0.368994	no	expressed protein	GO:0008150; GO:0009536	biological_process; cellular_component	biological_process; plastid	TAIR:AT4G21700; TAIR:AT4G21700	PF11145.1	DUF2921	Family	N/A	N/A	N/A	NA	NA	NA	NA	LOC_Os01g48610	NA	NA	NA	NA	NA	NA	NA	NA
XLOC_002305	XLOC_002305	LOC_Os01g51570	Chr1:29620953-29622393	11.7915	284.689	4.59357	6.42896	5e-05	0.0117035	yes	glycosyl hydrolases family 17, putative, expressed	GO:0005576; GO:0008152; GO:0006950; GO:0009628; GO:0009607; GO:0005773; GO:0016787; GO:0005618; GO:0005515	cellular_component; biological_process; biological_process; biological_process; biological_process; cellular_component; molecular_function; cellular_component; molecular_function	extracellular region; metabolic process; response to stress; response to abiotic stimulus; response to biotic stimulus; vacuole; hydrolase activity; cell wall; protein binding	TAIR:AT3G57260; TAIR:AT3G57260; TAIR:AT3G57260; TAIR:AT3G57260; TAIR:AT3G57260; TAIR:AT3G57260; TAIR:AT3G57260; TAIR:AT3G57260; TAIR:AT3G57260	PF00332.11	Glyco_hydro_17	Domain	IPR017853	Glycoside hydrolase, catalytic core	N/A	NA	NA	NA	NA	LOC_Os01g51570	NA	NA	NA	NA	NA	NA	NA	NA
XLOC_002326	XLOC_002326	LOC_Os01g52070	Chr1:29943909-29948654	0.813847	7.61459	3.22594	3.4624	0.014	0.328863	no	potassium channel AKT1, putative, expressed	GO:0005783; GO:0000166; GO:0005215; GO:0006810; GO:0009987; GO:0009607; GO:0005886	cellular_component; molecular_function; molecular_function; biological_process; biological_process; biological_process; cellular_component	endoplasmic reticulum; nucleotide binding; transporter activity; transport; cellular process; response to biotic stimulus; plasma membrane	TAIR:AT4G32650; TAIR:AT4G32650; TAIR:AT4G32650; TAIR:AT4G32650; TAIR:AT4G32650; TAIR:AT4G32650; TAIR:AT4G32650	PF00027.22	cNMP_binding	Domain	N/A	N/A	N/A	A2ZX97	NA	NA	NA	LOC_Os01g52070	NA	NA	NA	NA	NA	NA	NA	NA
XLOC_002335	XLOC_002335	LOC_Os01g52240	Chr1:30030996-30041522	3.82459	60.0424	3.9726	2.87986	0.04165	0.568003	no	chlorophyll A-B binding protein, putative, expressed	GO:0016020; GO:0009536; GO:0009579; GO:0006091; GO:0015979; GO:0005622; GO:0005488	cellular_component; cellular_component; cellular_component; biological_process; biological_process; cellular_component; molecular_function	membrane; plastid; thylakoid; generation of precursor metabolites and energy; photosynthesis; intracellular; binding	TAIR:AT2G34430; TAIR:AT2G34430; TAIR:AT2G34430; TAIR:AT2G34430; TAIR:AT2G34430; TAIR:AT2G34430; TAIR:AT2G34430	PF00504.14	Chloroa_b-bind	Family	N/A	N/A	N/A	NA	NA	NA	NA	LOC_Os01g52240	NA	NA	NA	NA	NA	NA	NA	NA
XLOC_002366	XLOC_002366	LOC_Os01g52710	Chr1:30311220-30315924	0.4258	5.08855	3.57901	3.66762	0.0111	0.295219	no	glycosyl transferase 8 domain containing protein, putative, expressed	GO:0016740; GO:0009058; GO:0005975	molecular_function; biological_process; biological_process	transferase activity; biosynthetic process; carbohydrate metabolic process	TAIR:AT3G58790; TAIR:AT3G58790; TAIR:AT3G58790	PF01501.13	Glyco_transf_8	Family	IPR002495	Glycosyl transferase, family 8	Molecular Function: transferase activity, transferring glycosyl groups (GO:0016757)	NA	NA	NA	NA	LOC_Os01g52710	NA	NA	NA	NA	NA	NA	NA	NA
XLOC_002457	XLOC_002457	LOC_Os01g54540	Chr1:31367014-31369426	11.4994	51.5654	2.16485	3.22235	0.00195	0.117623	no	ribosomal protein L13, putative, expressed	GO:0005840; GO:0006412; GO:0005198; GO:0009579; GO:0000003; GO:0009791; GO:0009790; GO:0009536; GO:0005840; GO:0006412; GO:0005198; GO:0009579; GO:0000003; GO:0009791; GO:0009790; GO:0009536	cellular_component; biological_process; molecular_function; cellular_component; biological_process; biological_process; biological_process; cellular_component; cellular_component; biological_process; molecular_function; cellular_component; biological_process; biological_process; biological_process; cellular_component	ribosome; translation; structural molecule activity; thylakoid; reproduction; post-embryonic development; embryo development; plastid; ribosome; translation; structural molecule activity; thylakoid; reproduction; post-embryonic development; embryo development; plastid	TAIR:AT1G78630; TAIR:AT1G78630; TAIR:AT1G78630; TAIR:AT1G78630; TAIR:AT1G78630; TAIR:AT1G78630; TAIR:AT1G78630; TAIR:AT1G78630; TAIR:AT1G78630; TAIR:AT1G78630; TAIR:AT1G78630; TAIR:AT1G78630; TAIR:AT1G78630; TAIR:AT1G78630; TAIR:AT1G78630; TAIR:AT1G78630	PF00572.11	Ribosomal_L13	Family	IPR005822	Ribosomal protein L13	Molecular Function: structural constituent of ribosome (GO:0003735), Cellular Component: intracellular (GO:0005622), Cellular Component: ribosome (GO:0005840), Biological Process: translation (GO:0006412)	NA	NA	NA	NA	LOC_Os01g54540	NA	NA	NA	NA	NA	NA	NA	NA
XLOC_002491	XLOC_002491	LOC_Os01g55240	Chr1:31795104-31797643	1.03624	10.9305	3.39893	3.77874	0.0053	0.200694	no	gibberellin 2-beta-dioxygenase, putative, expressed	GO:0003824; GO:0009056; GO:0009987; GO:0006629; GO:0008152; GO:0009628	molecular_function; biological_process; biological_process; biological_process; biological_process; biological_process	catalytic activity; catabolic process; cellular process; lipid metabolic process; metabolic process; response to abiotic stimulus	TAIR:AT1G30040; TAIR:AT1G30040; TAIR:AT1G30040; TAIR:AT1G30040; TAIR:AT1G30040; TAIR:AT1G30040	PF03171.13	2OG-FeII_Oxy	Domain	N/A	N/A	N/A	NA	NA	NA	NA	LOC_Os01g55240	PWY-102	gibberellin inactivation I (2&beta;-hydroxylation)	RXN-113	EC-1.14.11	GN7F-19910-MONOMER	LOC_Os05g48700.1	GN7F-19910	LOC_Os05g48700.1
XLOC_002572	XLOC_002572	LOC_Os01g57073	Chr1:32965304-32977407	4.87028	31.5445	2.69531	4.12041	0.00015	0.0255145	yes	insulin-degrading enzyme, putative, expressed	GO:0005575; GO:0005488; GO:0019538; GO:0016787; GO:0003824	cellular_component; molecular_function; biological_process; molecular_function; molecular_function	cellular_component; binding; protein metabolic process; hydrolase activity; catalytic activity	TAIR:AT2G41790; TAIR:AT2G41790; TAIR:AT2G41790; TAIR:AT2G41790; TAIR:AT2G41790	PF05193.14	Peptidase_M16_C	Domain	N/A	N/A	N/A	NA	NA	NA	NA	LOC_Os01g57073	NA	NA	NA	NA	NA	NA	NA	NA
XLOC_002679	XLOC_002679	LOC_Os01g59000	Chr1:34099443-34101175	1.46895	10.6029	2.8516	3.41766	0.0067	0.224323	no	cytochrome P450, putative, expressed	GO:0005623; GO:0003674; GO:0005488; GO:0003824; GO:0008152; GO:0019825	cellular_component; molecular_function; molecular_function; molecular_function; biological_process; molecular_function	cell; molecular_function; binding; catalytic activity; metabolic process; oxygen binding	TAIR:AT3G56630; TAIR:AT3G56630; TAIR:AT3G56630; TAIR:AT3G56630; TAIR:AT3G56630; TAIR:AT3G56630	PF00067.15	p450	Domain	N/A	N/A	N/A	NA	NA	NA	NA	LOC_Os01g59000	PWY-321	cutin biosynthesis	RXN-1061	EC-1.14.13	GN7F-26402-MONOMER	LOC_Os10g36320.1	GN7F-26402	LOC_Os10g36320.1
XLOC_002777	XLOC_002777	LOC_Os01g60930	Chr1:35243883-35246808	1.54764	10.6833	2.78722	3.32831	0.0077	0.242445	no	expressed protein	NA	NA	NA	NA	NA	NA	NA	N/A	N/A	N/A	NA	NA	NA	NA	LOC_Os01g60930	NA	NA	NA	NA	NA	NA	NA	NA
XLOC_002785	XLOC_002785	LOC_Os01g61080	Chr1:35347977-35350645	0.743916	6.23697	3.06763	3.26983	0.01465	0.338717	no	WRKY24, expressed	GO:0006950; GO:0009628; GO:0009058; GO:0006139; GO:0009607; GO:0009987; GO:0008150; GO:0005515; GO:0003700; GO:0019748; GO:0005634; GO:0009056	biological_process; biological_process; biological_process; biological_process; biological_process; biological_process; biological_process; molecular_function; molecular_function; biological_process; cellular_component; biological_process	response to stress; response to abiotic stimulus; biosynthetic process; nucleobase, nucleoside, nucleotide and nucleic acid metabolic process; response to biotic stimulus; cellular process; biological_process; protein binding; sequence-specific DNA binding transcription factor activity; secondary metabolic process; nucleus; catabolic process	TAIR:AT2G38470; TAIR:AT2G38470; TAIR:AT2G38470; TAIR:AT2G38470; TAIR:AT2G38470; TAIR:AT2G38470; TAIR:AT2G38470; TAIR:AT2G38470; TAIR:AT2G38470; TAIR:AT2G38470; TAIR:AT2G38470; TAIR:AT2G38470	PF03106.8	WRKY	Domain	N/A	N/A	N/A	NA	NA	NA	NA	LOC_Os01g61080	NA	NA	NA	NA	NA	NA	NA	NA
XLOC_002792	XLOC_002792	LOC_Os01g61230	Chr1:35430855-35432885	4.42336	19.4213	2.13443	2.86283	0.00705	0.230926	no	dihydroflavonol-4-reductase, putative, expressed	GO:0008152; GO:0003824; GO:0005488; GO:0005829; GO:0009058; GO:0009987; GO:0019748	biological_process; molecular_function; molecular_function; cellular_component; biological_process; biological_process; biological_process	metabolic process; catalytic activity; binding; cytosol; biosynthetic process; cellular process; secondary metabolic process	TAIR:AT5G58490; TAIR:AT5G58490; TAIR:AT5G58490; TAIR:AT5G58490; TAIR:AT5G58490; TAIR:AT5G58490; TAIR:AT5G58490	PF01370.14	Epimerase	Family	N/A	N/A	N/A	NA	NA	NA	NA	LOC_Os01g61230	NA	NA	NA	NA	NA	NA	NA	NA
XLOC_002930	XLOC_002930	LOC_Os01g64110	Chr1:37238900-37240778	0.480565	3.05727	2.66944	2.51828	0.0405	0.561733	no	glycosyl hydrolase, putative, expressed	GO:0006950; GO:0008152; GO:0009628; GO:0003824; GO:0005623; GO:0005488; GO:0016787; GO:0009991; GO:0007154	biological_process; biological_process; biological_process; molecular_function; cellular_component; molecular_function; molecular_function; biological_process; biological_process	response to stress; metabolic process; response to abiotic stimulus; catalytic activity; cell; binding; hydrolase activity; response to extracellular stimulus; cell communication	TAIR:AT5G24090; TAIR:AT5G24090; TAIR:AT5G24090; TAIR:AT5G24090; TAIR:AT5G24090; TAIR:AT5G24090; TAIR:AT5G24090; TAIR:AT5G24090; TAIR:AT5G24090	PF00704.21	Glyco_hydro_18	Domain	IPR001223	Glycoside hydrolase, family 18, catalytic domain	Molecular Function: hydrolase activity, hydrolyzing O-glycosyl compounds (GO:0004553), Biological Process: carbohydrate metabolic process (GO:0005975)	NA	NA	NA	NA	LOC_Os01g64110	PWY-6902	chitin degradation II	3.2.1.14-RXN	EC-3.2.1.14	GN7F-29613-MONOMER	chitinase	GN7F-29613	LOC_Os11g47590.1
XLOC_002931	XLOC_002931	LOC_Os01g64120	Chr1:37241154-37242103	0.825693	15.4715	4.22787	4.03161	0.0198	0.39715	no	2Fe-2S iron-sulfur cluster binding domain containing protein, expressed	GO:0003674; GO:0006091; GO:0005488; GO:0009536	molecular_function; biological_process; molecular_function; cellular_component	molecular_function; generation of precursor metabolites and energy; binding; plastid	TAIR:AT2G27510; TAIR:AT2G27510; TAIR:AT2G27510; TAIR:AT2G27510	PF00111.20	Fer2	Domain	IPR001041	Ferredoxin	Molecular Function: electron carrier activity (GO:0009055), Molecular Function: iron-sulfur cluster binding (GO:0051536)	NA	NA	NA	NA	LOC_Os01g64120	NA	NA	NA	NA	NA	NA	NA	NA
XLOC_003022	XLOC_003022	LOC_Os01g65904	Chr1:38273296-38274818	0.483455	5.42934	3.48932	3.25201	0.0237	0.435021	no	expressed protein	NA	NA	NA	NA	NA	NA	NA	N/A	N/A	N/A	NA	NA	NA	NA	LOC_Os01g65904	NA	NA	NA	NA	NA	NA	NA	NA
XLOC_003185	XLOC_003185	LOC_Os01g69870	Chr1:40371945-40373618	1.3937	23.1012	4.05098	3.9673	0.0113	0.296501	no	expressed protein	GO:0003674; GO:0008150; GO:0003674; GO:0008150	molecular_function; biological_process; molecular_function; biological_process	molecular_function; biological_process; molecular_function; biological_process	TAIR:AT1G27290; TAIR:AT1G27290; TAIR:AT1G27290; TAIR:AT1G27290	NA	NA	NA	N/A	N/A	N/A	NA	NA	NA	NA	LOC_Os01g69870	NA	NA	NA	NA	NA	NA	NA	NA
XLOC_003255	XLOC_003255	LOC_Os01g71340	Chr1:41346573-41348411	4.47869	118.034	4.71998	6.42079	5e-05	0.0117035	yes	glycosyl hydrolases family 17, putative, expressed	GO:0005576; GO:0016787; GO:0008152; GO:0005618; GO:0009607	cellular_component; molecular_function; biological_process; cellular_component; biological_process	extracellular region; hydrolase activity; metabolic process; cell wall; response to biotic stimulus	TAIR:AT3G57240; TAIR:AT3G57240; TAIR:AT3G57240; TAIR:AT3G57240; TAIR:AT3G57240	PF00332.11	Glyco_hydro_17	Domain	N/A	N/A	N/A	NA	NA	NA	NA	LOC_Os01g71340	NA	NA	NA	NA	NA	NA	NA	NA
XLOC_003256	XLOC_003256	LOC_Os01g71350	Chr1:41349730-41351148	1.62014	30.5186	4.23549	4.96912	0.00155	0.104719	no	glycosyl hydrolases family 17, putative, expressed	GO:0005576; GO:0008152; GO:0006950; GO:0009628; GO:0009607; GO:0005773; GO:0016787; GO:0005618; GO:0005515	cellular_component; biological_process; biological_process; biological_process; biological_process; cellular_component; molecular_function; cellular_component; molecular_function	extracellular region; metabolic process; response to stress; response to abiotic stimulus; response to biotic stimulus; vacuole; hydrolase activity; cell wall; protein binding	TAIR:AT3G57260; TAIR:AT3G57260; TAIR:AT3G57260; TAIR:AT3G57260; TAIR:AT3G57260; TAIR:AT3G57260; TAIR:AT3G57260; TAIR:AT3G57260; TAIR:AT3G57260	PF00332.11	Glyco_hydro_17	Domain	N/A	N/A	N/A	NA	NA	NA	NA	LOC_Os01g71350	NA	NA	NA	NA	NA	NA	NA	NA
XLOC_003292	XLOC_003292	LOC_Os01g72170	Chr1:41853849-41854883	2.9889	29.2786	3.29216	3.9566	0.00385	0.173924	no	glutathione S-transferase, putative, expressed	GO:0016740; GO:0008150; GO:0009056; GO:0009987; GO:0019748; GO:0008152; GO:0005737	molecular_function; biological_process; biological_process; biological_process; biological_process; biological_process; cellular_component	transferase activity; biological_process; catabolic process; cellular process; secondary metabolic process; metabolic process; cytoplasm	TAIR:AT3G09270; TAIR:AT3G09270; TAIR:AT3G09270; TAIR:AT3G09270; TAIR:AT3G09270; TAIR:AT3G09270; TAIR:AT3G09270	PF00043.18	GST_C	Domain	IPR004046	Glutathione S-transferase, C-terminal	N/A	NA	NA	NA	NA	LOC_Os01g72170	NA	NA	NA	NA	NA	NA	NA	NA
XLOC_003346	XLOC_003346	LOC_Os01g73170	Chr1:42429501-42432618	2.26398	53.9927	4.57583	5.81658	0.00045	0.0499057	yes	peroxidase precursor, putative, expressed	GO:0016020; GO:0005488; GO:0005575; GO:0008152; GO:0005773; GO:0006950; GO:0005618; GO:0003824	cellular_component; molecular_function; cellular_component; biological_process; cellular_component; biological_process; cellular_component; molecular_function	membrane; binding; cellular_component; metabolic process; vacuole; response to stress; cell wall; catalytic activity	TAIR:AT1G71695; TAIR:AT1G71695; TAIR:AT1G71695; TAIR:AT1G71695; TAIR:AT1G71695; TAIR:AT1G71695; TAIR:AT1G71695; TAIR:AT1G71695	PF00141.16	peroxidase	Family	IPR000823	Plant peroxidase	Molecular Function: peroxidase activity (GO:0004601), Biological Process: response to oxidative stress (GO:0006979), Molecular Function: heme binding (GO:0020037), Biological Process: oxidation reduction (GO:0055114)	NA	NA	NA	NA	LOC_Os01g73170	NA	NA	NA	NA	NA	NA	NA	NA
XLOC_003348	XLOC_003348	LOC_Os01g73200	Chr1:42441659-42442958	0.86466	25.5423	4.88461	5.1368	0.006	0.212735	no	peroxidase precursor, putative, expressed	GO:0016020; GO:0005488; GO:0005575; GO:0008152; GO:0005773; GO:0006950; GO:0005618; GO:0003824	cellular_component; molecular_function; cellular_component; biological_process; cellular_component; biological_process; cellular_component; molecular_function	membrane; binding; cellular_component; metabolic process; vacuole; response to stress; cell wall; catalytic activity	TAIR:AT1G71695; TAIR:AT1G71695; TAIR:AT1G71695; TAIR:AT1G71695; TAIR:AT1G71695; TAIR:AT1G71695; TAIR:AT1G71695; TAIR:AT1G71695	PF00141.16	peroxidase	Family	N/A	N/A	N/A	NA	NA	NA	NA	LOC_Os01g73200	NA	NA	NA	NA	NA	NA	NA	NA
XLOC_003482	XLOC_003482	LOC_Os01g02370,LOC_Os01g02390,LOC_Os01g02550	Chr1:750869-869340	0.569072	27.6055	5.6002	0.737396	0.04205	0.570517	no	receptor-like kinase ARK1AS, putative, expressed	NA	NA	NA	NA	NA	NA	NA	N/A	N/A	N/A	NA	NA	NA	NA	LOC_Os01g02370	NA	NA	NA	NA	NA	NA	NA	NA
XLOC_003511	XLOC_003511	LOC_Os01g02900	Chr1:1057136-1060053	1.20945	10.3255	3.09379	3.80927	0.0016	0.105405	no	glycosyltransferase, putative, expressed	GO:0016740; GO:0008152; GO:0008150; GO:0016740; GO:0008152; GO:0008150	molecular_function; biological_process; biological_process; molecular_function; biological_process; biological_process	transferase activity; metabolic process; biological_process; transferase activity; metabolic process; biological_process	TAIR:AT3G18170; TAIR:AT3G18170; TAIR:AT3G18170; TAIR:AT3G18170; TAIR:AT3G18170; TAIR:AT3G18170	PF04577.7	DUF563	Family	IPR007657	Glycosyltransferase AER61, uncharacterised	Molecular Function: transferase activity, transferring glycosyl groups (GO:0016757)	NA	NA	NA	NA	LOC_Os01g02900	NA	NA	NA	NA	NA	NA	NA	NA
XLOC_003519	XLOC_003519	LOC_Os01g03020,LOC_Os01g03320,LOC_Os01g03330,LOC_Os01g03340	Chr1:1135996-1348786	10.7474	206.814	4.26627	1.08944	0.03285	0.508713	no	tRNA synthetase class I, putative, expressed	GO:0003824; GO:0008152; GO:0000166; GO:0006412; GO:0006139; GO:0005739; GO:0000003; GO:0009791; GO:0009790; GO:0009536; GO:0003824; GO:0008152; GO:0000166; GO:0006412; GO:0006139; GO:0005739; GO:0000003; GO:0009791; GO:0009790; GO:0009536	molecular_function; biological_process; molecular_function; biological_process; biological_process; cellular_component; biological_process; biological_process; biological_process; cellular_component; molecular_function; biological_process; molecular_function; biological_process; biological_process; cellular_component; biological_process; biological_process; biological_process; cellular_component	catalytic activity; metabolic process; nucleotide binding; translation; nucleobase, nucleoside, nucleotide and nucleic acid metabolic process; mitochondrion; reproduction; post-embryonic development; embryo development; plastid; catalytic activity; metabolic process; nucleotide binding; translation; nucleobase, nucleoside, nucleotide and nucleic acid metabolic process; mitochondrion; reproduction…	TAIR:AT4G04350; TAIR:AT4G04350; TAIR:AT4G04350; TAIR:AT4G04350; TAIR:AT4G04350; TAIR:AT4G04350; TAIR:AT4G04350; TAIR:AT4G04350; TAIR:AT4G04350; TAIR:AT4G04350; TAIR:AT4G04350; TAIR:AT4G04350; TAIR:AT4G04350; TAIR:AT4G04350; TAIR:AT4G04350; TAIR:AT4G04350; TAIR:AT4G04350; TAIR:AT4G04350; TAIR:AT4G04350; TAIR:AT4G04350	PF00133.15	tRNA-synt_1	Family	N/A	N/A	N/A	NA	NA	NA	NA	LOC_Os01g03020	NA	NA	NA	NA	NA	NA	NA	NA
XLOC_003540	XLOC_003540	LOC_Os01g03390	Chr1:1365507-1366503	18.7291	121.105	2.69291	4.16515	5e-05	0.0117035	yes	BBTI7 - Bowman-Birk type bran trypsin inhibitor precursor, expressed	NA	NA	NA	NA	PF00228.13	Bowman-Birk_leg	Domain	N/A	N/A	N/A	NA	NA	NA	NA	LOC_Os01g03390	NA	NA	NA	NA	NA	NA	NA	NA
XLOC_003559	XLOC_003559	LOC_Os01g03870	Chr1:1641233-1644237	0.222541	2.96025	3.73358	3.26974	0.0391	0.551865	no	expressed protein	GO:0005623; GO:0005840; GO:0006412; GO:0005622; GO:0005198	cellular_component; cellular_component; biological_process; cellular_component; molecular_function	cell; ribosome; translation; intracellular; structural molecule activity	TAIR:AT1G73850; TAIR:AT1G73850; TAIR:AT1G73850; TAIR:AT1G73850; TAIR:AT1G73850	PF07891.5	DUF1666	Family	N/A	N/A	N/A	NA	NA	NA	NA	LOC_Os01g03870	NA	NA	NA	NA	NA	NA	NA	NA
XLOC_003616	XLOC_003616	LOC_Os01g05060	Chr1:2374412-2376768	5.77688	25.2088	2.12557	3.00051	0.00835	0.254298	no	mitochondrial glycoprotein, putative, expressed	GO:0003674; GO:0005739; GO:0008150	molecular_function; cellular_component; biological_process	molecular_function; mitochondrion; biological_process	TAIR:AT3G55605; TAIR:AT3G55605; TAIR:AT3G55605	PF02330.9	MAM33	Domain	N/A	N/A	N/A	NA	NA	NA	NA	LOC_Os01g05060	NA	NA	NA	NA	NA	NA	NA	NA
XLOC_003681	XLOC_003681	LOC_Os01g06520	Chr1:3067322-3071243	0.972091	5.17769	2.41314	2.71839	0.01705	0.370257	no	verticillium wilt disease resistance protein, putative, expressed	GO:0016020; GO:0007165; GO:0006950	cellular_component; biological_process; biological_process	membrane; signal transduction; response to stress	TAIR:AT1G45616; TAIR:AT1G45616; TAIR:AT1G45616	PF00560.26	LRR_1	Repeat	IPR001611	Leucine-rich repeat	Molecular Function: protein binding (GO:0005515)	NA	NA	NA	NA	LOC_Os01g06520	NA	NA	NA	NA	NA	NA	NA	NA
XLOC_003767	XLOC_003767	LOC_Os01g07970	Chr1:3855045-3856060	2.29033	44.4562	4.27876	5.10778	0.00115	0.0872812	no	expressed protein	GO:0003674; GO:0008150	molecular_function; biological_process	molecular_function; biological_process	TAIR:AT1G52720; TAIR:AT1G52720	NA	NA	NA	N/A	N/A	N/A	NA	NA	NA	NA	LOC_Os01g07970	NA	NA	NA	NA	NA	NA	NA	NA
XLOC_003818	XLOC_003818	LOC_Os01g09100	Chr1:4571783-4573486	1.01473	17.3765	4.09796	4.20716	0.0095	0.271355	no	WRKY10, expressed	GO:0006950; GO:0009607; GO:0009719; GO:0007165; GO:0005515; GO:0009058; GO:0006139; GO:0003700	biological_process; biological_process; biological_process; biological_process; molecular_function; biological_process; biological_process; molecular_function	response to stress; response to biotic stimulus; response to endogenous stimulus; signal transduction; protein binding; biosynthetic process; nucleobase, nucleoside, nucleotide and nucleic acid metabolic process; sequence-specific DNA binding transcription factor activity	TAIR:AT5G26170; TAIR:AT5G26170; TAIR:AT5G26170; TAIR:AT5G26170; TAIR:AT5G26170; TAIR:AT5G26170; TAIR:AT5G26170; TAIR:AT5G26170	PF03106.8	WRKY	Domain	IPR003657	DNA-binding WRKY	Molecular Function: transcription factor activity (GO:0003700), Molecular Function: sequence-specific DNA binding (GO:0043565), Biological Process: regulation of transcription (GO:0045449)	NA	NA	NA	NA	LOC_Os01g09100	NA	NA	NA	NA	NA	NA	NA	NA
XLOC_003917	XLOC_003917	LOC_Os01g11160	Chr1:5983580-5985875	0.730189	8.0443	3.46163	3.73193	0.0091	0.265668	no	amino acid permease family protein, putative, expressed	GO:0005215; GO:0006810; GO:0009987; GO:0005886	molecular_function; biological_process; biological_process; cellular_component	transporter activity; transport; cellular process; plasma membrane	TAIR:AT2G34960; TAIR:AT2G34960; TAIR:AT2G34960; TAIR:AT2G34960	PF00324.14	AA_permease	Family	N/A	N/A	N/A	NA	NA	NA	NA	LOC_Os01g11160	NA	NA	NA	NA	NA	NA	NA	NA
XLOC_004105	XLOC_004105	LOC_Os01g15190,LOC_Os01g15270	Chr1:8486471-8546894	57.3799	725.681	3.66072	2.9809	0.01505	0.343166	no	retrotransposon protein, putative, unclassified, expressed	NA	NA	NA	NA	PF04195.5	Transposase_28	Family	N/A	N/A	N/A	NA	NA	NA	NA	LOC_Os01g15190	NA	NA	NA	NA	NA	NA	NA	NA
XLOC_004254	XLOC_004254	LOC_Os01g18670	Chr1:10515346-10522188	4.1393	27.9904	2.75747	4.21639	0.0001	0.0199623	yes	MDR-like ABC transporter, putative, expressed	GO:0006810; GO:0016020; GO:0005773; GO:0009987; GO:0016787; GO:0005215; GO:0009056; GO:0006139; GO:0005886	biological_process; cellular_component; cellular_component; biological_process; molecular_function; molecular_function; biological_process; biological_process; cellular_component	transport; membrane; vacuole; cellular process; hydrolase activity; transporter activity; catabolic process; nucleobase, nucleoside, nucleotide and nucleic acid metabolic process; plasma membrane	TAIR:AT3G62150; TAIR:AT3G62150; TAIR:AT3G62150; TAIR:AT3G62150; TAIR:AT3G62150; TAIR:AT3G62150; TAIR:AT3G62150; TAIR:AT3G62150; TAIR:AT3G62150	PF00005.20	ABC_tran	Domain	IPR003439	ABC transporter-like	Molecular Function: ATP binding (GO:0005524), Molecular Function: ATPase activity (GO:0016887)	NA	NA	NA	NA	LOC_Os01g18670	NA	NA	NA	NA	NA	NA	NA	NA
XLOC_005067	XLOC_005067	LOC_Os01g38530	Chr1:21637030-21643111	2.41525	15.664	2.69721	3.44636	0.0025	0.13776	no	ELF3 protein, putative, expressed	GO:0008150; GO:0009719; GO:0016043; GO:0009653; GO:0016049; GO:0005634; GO:0009058; GO:0006139; GO:0006950; GO:0009628; GO:0009908; GO:0009605; GO:0000003; GO:0009791; GO:0007165; GO:0005515; GO:0009987; GO:0003700; GO:0008150; GO:0009719; GO:0016043; GO:0009653; GO:0016049; GO:0005634; GO:0009058; GO:0006139; GO:0006950; GO:0009628; GO:0009908; GO:0009605; GO:0000003; GO:0009791; GO:0007165; GO:…	biological_process; biological_process; biological_process; biological_process; biological_process; cellular_component; biological_process; biological_process; biological_process; biological_process; biological_process; biological_process; biological_process; biological_process; biological_process; molecular_function; biological_process; molecular_function; biological_process; biological_process;…	biological_process; response to endogenous stimulus; cellular component organization; anatomical structure morphogenesis; cell growth; nucleus; biosynthetic process; nucleobase, nucleoside, nucleotide and nucleic acid metabolic process; response to stress; response to abiotic stimulus; flower development; response to external stimulus; reproduction; post-embryonic development; signal transduction…	TAIR:AT2G25930; TAIR:AT2G25930; TAIR:AT2G25930; TAIR:AT2G25930; TAIR:AT2G25930; TAIR:AT2G25930; TAIR:AT2G25930; TAIR:AT2G25930; TAIR:AT2G25930; TAIR:AT2G25930; TAIR:AT2G25930; TAIR:AT2G25930; TAIR:AT2G25930; TAIR:AT2G25930; TAIR:AT2G25930; TAIR:AT2G25930; TAIR:AT2G25930; TAIR:AT2G25930; TAIR:AT2G25930; TAIR:AT2G25930; TAIR:AT2G25930; TAIR:AT2G25930; TAIR:AT2G25930; TAIR:AT2G25930; TAIR:AT2G25930;…	NA	NA	NA	N/A	N/A	N/A	NA	NA	NA	NA	LOC_Os01g38530	NA	NA	NA	NA	NA	NA	NA	NA
XLOC_005071	XLOC_005071	LOC_Os01g38610	Chr1:21687400-21689929	1.6852	6.98988	2.05235	2.65399	0.0173	0.373539	no	helix-loop-helix DNA-binding domain containing protein, expressed	GO:0003677; GO:0005634; GO:0009058; GO:0006139; GO:0003700	molecular_function; cellular_component; biological_process; biological_process; molecular_function	DNA binding; nucleus; biosynthetic process; nucleobase, nucleoside, nucleotide and nucleic acid metabolic process; sequence-specific DNA binding transcription factor activity	TAIR:AT3G21330; TAIR:AT3G21330; TAIR:AT3G21330; TAIR:AT3G21330; TAIR:AT3G21330	PF00010.19	HLH	Domain	N/A	N/A	N/A	NA	NA	NA	NA	LOC_Os01g38610	NA	NA	NA	NA	NA	NA	NA	NA
XLOC_005241	XLOC_005241	LOC_Os01g42410	Chr1:24107079-24115268	1.61649	10.9958	2.76601	4.01201	0.00045	0.0499057	yes	pleiotropic drug resistance protein, putative, expressed	GO:0006810; GO:0009987; GO:0016787; GO:0005215; GO:0009056; GO:0006139; GO:0005886	biological_process; biological_process; molecular_function; molecular_function; biological_process; biological_process; cellular_component	transport; cellular process; hydrolase activity; transporter activity; catabolic process; nucleobase, nucleoside, nucleotide and nucleic acid metabolic process; plasma membrane	TAIR:AT2G36380; TAIR:AT2G36380; TAIR:AT2G36380; TAIR:AT2G36380; TAIR:AT2G36380; TAIR:AT2G36380; TAIR:AT2G36380	PF00005.20	ABC_tran	Domain	IPR013525	ABC-2 type transporter	Cellular Component: membrane (GO:0016020)	Q8GU89	4327730;	NP_001043541.1;	osa:4327730;	LOC_Os01g42410	NA	NA	NA	NA	NA	NA	NA	NA
XLOC_005259	XLOC_005259	LOC_Os01g42790	Chr1:24351301-24353345	0.668647	6.59241	3.30149	3.19677	0.02295	0.427936	no	xylem cysteine proteinase 2 precursor, putative, expressed	GO:0005623; GO:0019538; GO:0016787	cellular_component; biological_process; molecular_function	cell; protein metabolic process; hydrolase activity	TAIR:AT2G27420; TAIR:AT2G27420; TAIR:AT2G27420	PF08246.5	Inhibitor_I29	Domain	IPR000668	Peptidase C1A, papain C-terminal	Biological Process: proteolysis (GO:0006508), Molecular Function: cysteine-type peptidase activity (GO:0008234)	NA	NA	NA	NA	LOC_Os01g42790	NA	NA	NA	NA	NA	NA	NA	NA
XLOC_005485	XLOC_005485	LOC_Os01g48000	Chr1:27474004-27476806	0.251028	3.20828	3.67588	3.4476	0.02225	0.42142	no	S-locus-like receptor protein kinase, putative, expressed	GO:0008152; GO:0009987; GO:0000166; GO:0030246; GO:0016301; GO:0006464; GO:0005515; GO:0005886	biological_process; biological_process; molecular_function; molecular_function; molecular_function; biological_process; molecular_function; cellular_component	metabolic process; cellular process; nucleotide binding; carbohydrate binding; kinase activity; protein modification process; protein binding; plasma membrane	TAIR:AT1G34300; TAIR:AT1G34300; TAIR:AT1G34300; TAIR:AT1G34300; TAIR:AT1G34300; TAIR:AT1G34300; TAIR:AT1G34300; TAIR:AT1G34300	PF08276.4	PAN_2	Family	N/A	N/A	N/A	NA	NA	NA	NA	LOC_Os01g48000	PWY-6952	glycerophosphodiester degradation	GLYCPDIESTER-RXN	EC-3.1.4.46	GN7F-24786-MONOMER	glycerophosphodiester phosphodiesterase	GN7F-24786	LOC_Os04g09770.1
XLOC_005538	XLOC_005538	LOC_Os01g49320	Chr1:28354770-28356109	2.22887	29.0356	3.70344	4.47292	0.00205	0.121303	no	glycosyl hydrolase, putative, expressed	GO:0006950; GO:0008152; GO:0009628; GO:0003824; GO:0005623; GO:0005488; GO:0016787; GO:0009991; GO:0007154	biological_process; biological_process; biological_process; molecular_function; cellular_component; molecular_function; molecular_function; biological_process; biological_process	response to stress; metabolic process; response to abiotic stimulus; catalytic activity; cell; binding; hydrolase activity; response to extracellular stimulus; cell communication	TAIR:AT5G24090; TAIR:AT5G24090; TAIR:AT5G24090; TAIR:AT5G24090; TAIR:AT5G24090; TAIR:AT5G24090; TAIR:AT5G24090; TAIR:AT5G24090; TAIR:AT5G24090	PF00704.21	Glyco_hydro_18	Domain	IPR017853	Glycoside hydrolase, catalytic core	N/A	NA	NA	NA	NA	LOC_Os01g49320	PWY-6902	chitin degradation II	3.2.1.14-RXN	EC-3.2.1.14	GN7F-29613-MONOMER	chitinase	GN7F-29613	LOC_Os11g47590.1
XLOC_005611	XLOC_005611	LOC_Os01g50910	Chr1:29233027-29234256	0.570616	4.86987	3.09329	2.57601	0.04205	0.570517	no	late embryogenesis abundant protein, group 3, putative, expressed	GO:0003674; GO:0005634; GO:0000003; GO:0009791; GO:0009790; GO:0003674; GO:0005634; GO:0000003; GO:0009791; GO:0009790	molecular_function; cellular_component; biological_process; biological_process; biological_process; molecular_function; cellular_component; biological_process; biological_process; biological_process	molecular_function; nucleus; reproduction; post-embryonic development; embryo development; molecular_function; nucleus; reproduction; post-embryonic development; embryo development	TAIR:AT3G15670; TAIR:AT3G15670; TAIR:AT3G15670; TAIR:AT3G15670; TAIR:AT3G15670; TAIR:AT3G15670; TAIR:AT3G15670; TAIR:AT3G15670; TAIR:AT3G15670; TAIR:AT3G15670	PF02987.9	LEA_4	Family	N/A	N/A	N/A	NA	NA	NA	NA	LOC_Os01g50910	NA	NA	NA	NA	NA	NA	NA	NA
XLOC_005616	XLOC_005616	LOC_Os01g51060	Chr1:29326688-29334795	0.329632	1.89074	2.52002	2.36419	0.04965	0.610385	no	hydrolase, putative, expressed	GO:0006950; GO:0005783; GO:0019538; GO:0008152; GO:0016787; GO:0005886	biological_process; cellular_component; biological_process; biological_process; molecular_function; cellular_component	response to stress; endoplasmic reticulum; protein metabolic process; metabolic process; hydrolase activity; plasma membrane	TAIR:AT1G51760; TAIR:AT1G51760; TAIR:AT1G51760; TAIR:AT1G51760; TAIR:AT1G51760; TAIR:AT1G51760	PF07687.7	M20_dimer	Domain	IPR011650	Peptidase M20, dimerisation	Molecular Function: protein binding (GO:0005515), Molecular Function: hydrolase activity (GO:0016787)	Q5N8F2	4327677;	NP_001044020.1;	osa:4327677;	LOC_Os01g51060	PWY-1822	indole-3-acetate activation I	RXN-2982	EC-3.5.1	GN7F-18307-MONOMER	LOC_Os07g14600.1	GN7F-18307	LOC_Os07g14600.1
XLOC_005701	XLOC_005701	LOC_Os01g53090	Chr1:30512275-30521565	0.515468	4.21488	3.03154	2.49267	0.04305	0.573494	no	pathogen-related protein, putative, expressed	GO:0003674; GO:0008150	molecular_function; biological_process	molecular_function; biological_process	TAIR:AT1G78780; TAIR:AT1G78780	NA	NA	NA	N/A	N/A	N/A	NA	NA	NA	NA	LOC_Os01g53090	NA	NA	NA	NA	NA	NA	NA	NA
XLOC_005724	XLOC_005724	LOC_Os01g53730	Chr1:30878994-30886340	16.9507	71.1094	2.0687	2.80987	0.0069	0.227989	no	expressed protein	GO:0006950; GO:0003674; GO:0008150; GO:0005654	biological_process; molecular_function; biological_process; cellular_component	response to stress; molecular_function; biological_process; nucleoplasm	TAIR:AT5G56550; TAIR:AT5G56550; TAIR:AT5G56550; TAIR:AT5G56550	NA	NA	NA	N/A	N/A	N/A	NA	NA	NA	NA	LOC_Os01g53730	NA	NA	NA	NA	NA	NA	NA	NA
XLOC_005803	XLOC_005803	LOC_Os01g55290	Chr1:31825838-31830184	1.0466	4.20648	2.0069	2.16678	0.0407	0.562839	no	PPR repeat domain containing protein, putative, expressed	GO:0003674; GO:0000003; GO:0009791; GO:0009790; GO:0003674; GO:0000003; GO:0009791; GO:0009790; GO:0003674; GO:0000003; GO:0009791; GO:0009790	molecular_function; biological_process; biological_process; biological_process; molecular_function; biological_process; biological_process; biological_process; molecular_function; biological_process; biological_process; biological_process	molecular_function; reproduction; post-embryonic development; embryo development; molecular_function; reproduction; post-embryonic development; embryo development; molecular_function; reproduction; post-embryonic development; embryo development	TAIR:AT4G21190; TAIR:AT4G21190; TAIR:AT4G21190; TAIR:AT4G21190; TAIR:AT4G21190; TAIR:AT4G21190; TAIR:AT4G21190; TAIR:AT4G21190; TAIR:AT4G21190; TAIR:AT4G21190; TAIR:AT4G21190; TAIR:AT4G21190	PF01535.13	PPR	Family	N/A	N/A	N/A	NA	NA	NA	NA	LOC_Os01g55290	NA	NA	NA	NA	NA	NA	NA	NA
XLOC_005869	XLOC_005869	LOC_Os01g56450	Chr1:32534856-32536024	0.974799	9.63467	3.30506	3.31888	0.0144	0.335134	no	DUF567 domain containing protein, putative, expressed	GO:0003674; GO:0005575; GO:0005515; GO:0008150	molecular_function; cellular_component; molecular_function; biological_process	molecular_function; cellular_component; protein binding; biological_process	TAIR:AT1G80120; TAIR:AT1G80120; TAIR:AT1G80120; TAIR:AT1G80120	PF04525.5	DUF567	Family	N/A	N/A	N/A	NA	NA	NA	NA	LOC_Os01g56450	NA	NA	NA	NA	NA	NA	NA	NA
XLOC_005981	XLOC_005981	LOC_Os01g59060	Chr1:34133776-34135646	6.2342	25.7543	2.04653	2.63823	0.01765	0.377399	no	50S ribosomal protein, putative, expressed	GO:0005840; GO:0009987; GO:0006412; GO:0005622; GO:0005198; GO:0009536	cellular_component; biological_process; biological_process; cellular_component; molecular_function; cellular_component	ribosome; cellular process; translation; intracellular; structural molecule activity; plastid	TAIR:AT1G29070; TAIR:AT1G29070; TAIR:AT1G29070; TAIR:AT1G29070; TAIR:AT1G29070; TAIR:AT1G29070	PF00468.10	Ribosomal_L34	Family	N/A	N/A	N/A	NA	NA	NA	NA	LOC_Os01g59060	NA	NA	NA	NA	NA	NA	NA	NA
XLOC_006014	XLOC_006014	LOC_Os01g59840	Chr1:34605403-34611037	2.36946	11.6525	2.298	2.89393	0.01555	0.349594	no	Os1bglu3 - beta-glucosidase homologue, similar to G. max isohydroxyurate hydrolase, expressed	GO:0005488; GO:0016787; GO:0008152; GO:0005975; GO:0003824	molecular_function; molecular_function; biological_process; biological_process; molecular_function	binding; hydrolase activity; metabolic process; carbohydrate metabolic process; catalytic activity	TAIR:AT1G02850; TAIR:AT1G02850; TAIR:AT1G02850; TAIR:AT1G02850; TAIR:AT1G02850	PF00232.11	Glyco_hydro_1	Domain	N/A	N/A	N/A	Q8RZL1	4327593;	NP_001044601.2;	osa:4327593;	LOC_Os01g59840	NA	NA	NA	NA	NA	NA	NA	NA
XLOC_006024	XLOC_006024	LOC_Os01g60020	Chr1:34692829-34694391	0.54584	5.02415	3.20233	2.94689	0.042	0.570517	no	NAC domain transcription factor, putative, expressed	GO:0005634; GO:0009058; GO:0006139; GO:0007275; GO:0003700	cellular_component; biological_process; biological_process; biological_process; molecular_function	nucleus; biosynthetic process; nucleobase, nucleoside, nucleotide and nucleic acid metabolic process; multicellular organismal development; sequence-specific DNA binding transcription factor activity	TAIR:AT1G77450; TAIR:AT1G77450; TAIR:AT1G77450; TAIR:AT1G77450; TAIR:AT1G77450	PF02365.8	NAM	Family	IPR003441	No apical meristem (NAM) protein	Molecular Function: DNA binding (GO:0003677), Biological Process: regulation of transcription (GO:0045449)	Q52QH4	4327485;	NP_001044617.1;	osa:4327485;	LOC_Os01g60020	NA	NA	NA	NA	NA	NA	NA	NA
XLOC_006064	XLOC_006064	LOC_Os01g60860	Chr1:35185510-35188004	2.62577	11.4161	2.12025	2.9725	0.0057	0.207952	no	spotted leaf 11, putative, expressed	GO:0008150; GO:0005622; GO:0006464; GO:0005488; GO:0003824	biological_process; cellular_component; biological_process; molecular_function; molecular_function	biological_process; intracellular; protein modification process; binding; catalytic activity	TAIR:AT5G01830; TAIR:AT5G01830; TAIR:AT5G01830; TAIR:AT5G01830; TAIR:AT5G01830	PF00514.16	Arm	Repeat	IPR003613	U box domain	Cellular Component: ubiquitin ligase complex (GO:0000151), Molecular Function: ubiquitin-protein ligase activity (GO:0004842), Biological Process: protein ubiquitination (GO:0016567)	NA	NA	NA	NA	LOC_Os01g60860	NA	NA	NA	NA	NA	NA	NA	NA
XLOC_006090	XLOC_006090	LOC_Os01g61510	Chr1:35585794-35588568	0.3515	2.74141	2.96332	2.58178	0.03205	0.501314	no	ammonium transporter protein, putative, expressed	GO:0005215; GO:0006810; GO:0009987; GO:0005575; GO:0009607; GO:0005886	molecular_function; biological_process; biological_process; cellular_component; biological_process; cellular_component	transporter activity; transport; cellular process; cellular_component; response to biotic stimulus; plasma membrane	TAIR:AT2G38290; TAIR:AT2G38290; TAIR:AT2G38290; TAIR:AT2G38290; TAIR:AT2G38290; TAIR:AT2G38290	PF00909.14	Ammonium_transp	Family	N/A	N/A	N/A	Q8S233	4327433;	NP_001044701.1;	osa:4327433;	LOC_Os01g61510	NA	NA	NA	NA	NA	NA	NA	NA
XLOC_006115	XLOC_006115	LOC_Os01g61990	Chr1:35884768-35889014	2.54168	16.5581	2.70368	3.69277	0.0015	0.102124	no	ankyrin repeat-containing protein, putative, expressed	GO:0006950; GO:0009628; GO:0005886; GO:0006950; GO:0009628; GO:0005886	biological_process; biological_process; cellular_component; biological_process; biological_process; cellular_component	response to stress; response to abiotic stimulus; plasma membrane; response to stress; response to abiotic stimulus; plasma membrane	TAIR:AT3G12360; TAIR:AT3G12360; TAIR:AT3G12360; TAIR:AT3G12360; TAIR:AT3G12360; TAIR:AT3G12360	NA	NA	NA	N/A	N/A	N/A	NA	NA	NA	NA	LOC_Os01g61990	NA	NA	NA	NA	NA	NA	NA	NA
XLOC_006203	XLOC_006203	LOC_Os01g63690	Chr1:36942595-36944593	1.79814	18.7278	3.38061	4.39161	0.00105	0.0834009	no	hs1, putative, expressed	GO:0005575; GO:0005515; GO:0008150	cellular_component; molecular_function; biological_process	cellular_component; protein binding; biological_process	TAIR:AT3G55840; TAIR:AT3G55840; TAIR:AT3G55840	PF07231.5	Hs1pro-1_N	Family	N/A	N/A	N/A	NA	NA	NA	NA	LOC_Os01g63690	NA	NA	NA	NA	NA	NA	NA	NA
XLOC_006215	XLOC_006215	LOC_Os01g63930	Chr1:37095402-37099183	0.504893	3.96196	2.97216	3.33385	0.00725	0.234285	no	cytochrome P450, putative, expressed	GO:0006950; GO:0005623; GO:0008152; GO:0019825; GO:0003824; GO:0006950; GO:0005623; GO:0008152; GO:0019825; GO:0003824	biological_process; cellular_component; biological_process; molecular_function; molecular_function; biological_process; cellular_component; biological_process; molecular_function; molecular_function	response to stress; cell; metabolic process; oxygen binding; catalytic activity; response to stress; cell; metabolic process; oxygen binding; catalytic activity	TAIR:AT2G27690; TAIR:AT2G27690; TAIR:AT2G27690; TAIR:AT2G27690; TAIR:AT2G27690; TAIR:AT2G27690; TAIR:AT2G27690; TAIR:AT2G27690; TAIR:AT2G27690; TAIR:AT2G27690	PF00067.15	p450	Domain	N/A	N/A	N/A	NA	NA	NA	NA	LOC_Os01g63930	PWY-282	cuticular wax biosynthesis	RXN-1022	-	GN7F-21340-MONOMER		GN7F-21340	LOC_Os01g08810.1
XLOC_006453	XLOC_006453	LOC_Os01g68740	Chr1:39925521-39927267	2.02628	15.6267	2.94711	3.54212	0.00545	0.204038	no	keratin, type I cytoskeletal 9, putative, expressed	NA	NA	NA	NA	NA	NA	NA	N/A	N/A	N/A	NA	NA	NA	NA	LOC_Os01g68740	NA	NA	NA	NA	NA	NA	NA	NA
XLOC_006529	XLOC_006529	LOC_Os01g70770	Chr1:40962400-40964248	1.44985	12.2155	3.07473	3.42823	0.007	0.23	no	glutathione S-transferase, putative, expressed	GO:0016740; GO:0009056; GO:0009987; GO:0019748; GO:0008152; GO:0005737	molecular_function; biological_process; biological_process; biological_process; biological_process; cellular_component	transferase activity; catabolic process; cellular process; secondary metabolic process; metabolic process; cytoplasm	TAIR:AT3G62760; TAIR:AT3G62760; TAIR:AT3G62760; TAIR:AT3G62760; TAIR:AT3G62760; TAIR:AT3G62760	PF02798.13	GST_N	Domain	N/A	N/A	N/A	NA	NA	NA	NA	LOC_Os01g70770	NA	NA	NA	NA	NA	NA	NA	NA
XLOC_006654	XLOC_006654	LOC_Os01g73500	Chr1:42587235-42590338	15.2639	70.0377	2.19801	3.36698	0.0012	0.0895346	no	expressed protein	GO:0003674; GO:0008150; GO:0003674; GO:0008150	molecular_function; biological_process; molecular_function; biological_process	molecular_function; biological_process; molecular_function; biological_process	TAIR:AT5G04830; TAIR:AT5G04830; TAIR:AT5G04830; TAIR:AT5G04830	NA	NA	NA	N/A	N/A	N/A	NA	NA	NA	NA	LOC_Os01g73500	NA	NA	NA	NA	NA	NA	NA	NA
XLOC_006864	XLOC_006864	LOC_Os10g04490	Chr10:2128775-2131672	1.13731	8.43458	2.89069	3.26587	0.01335	0.322178	no	expressed protein	GO:0000166; GO:0006950	molecular_function; biological_process	nucleotide binding; response to stress	TAIR:AT3G14460; TAIR:AT3G14460	NA	NA	NA	N/A	N/A	N/A	Q948E0	NA	NA	NA	LOC_Os10g04490	NA	NA	NA	NA	NA	NA	NA	NA
XLOC_006903	XLOC_006903	LOC_Os10g05250	Chr10:2591412-2596634	0.219136	4.82783	4.46148	4.01607	0.0385	0.548788	no	protein kinase domain containing protein, expressed	GO:0008152; GO:0009987; GO:0000166; GO:0030246; GO:0016301; GO:0006464; GO:0005623; GO:0009875	biological_process; biological_process; molecular_function; molecular_function; molecular_function; biological_process; cellular_component; biological_process	metabolic process; cellular process; nucleotide binding; carbohydrate binding; kinase activity; protein modification process; cell; pollen-pistil interaction	TAIR:AT1G11300; TAIR:AT1G11300; TAIR:AT1G11300; TAIR:AT1G11300; TAIR:AT1G11300; TAIR:AT1G11300; TAIR:AT1G11300; TAIR:AT1G11300	PF00069.18	Pkinase	Domain	IPR011009	Protein kinase-like domain	N/A	Q7XGX6	NA	NA	NA	LOC_Os10g05250	NA	NA	NA	NA	NA	NA	NA	NA
XLOC_007224	XLOC_007224	LOC_Os10g12050,LOC_Os10g12080	Chr10:6651115-6846753	3.73575	23.2942	2.6405	2.5475	0.01665	0.365168	no	expressed protein	GO:0003824; GO:0005623; GO:0005783; GO:0009058; GO:0009987; GO:0019748; GO:0008152; GO:0005739; GO:0005886; GO:0003824; GO:0005623; GO:0005783; GO:0009058; GO:0009987; GO:0019748; GO:0008152; GO:0005739; GO:0005886	molecular_function; cellular_component; cellular_component; biological_process; biological_process; biological_process; biological_process; cellular_component; cellular_component; molecular_function; cellular_component; cellular_component; biological_process; biological_process; biological_process; biological_process; cellular_component; cellular_component	catalytic activity; cell; endoplasmic reticulum; biosynthetic process; cellular process; secondary metabolic process; metabolic process; mitochondrion; plasma membrane; catalytic activity; cell; endoplasmic reticulum; biosynthetic process; cellular process; secondary metabolic process; metabolic process; mitochondrion; plasma membrane	TAIR:AT2G40890; TAIR:AT2G40890; TAIR:AT2G40890; TAIR:AT2G40890; TAIR:AT2G40890; TAIR:AT2G40890; TAIR:AT2G40890; TAIR:AT2G40890; TAIR:AT2G40890; TAIR:AT2G40890; TAIR:AT2G40890; TAIR:AT2G40890; TAIR:AT2G40890; TAIR:AT2G40890; TAIR:AT2G40890; TAIR:AT2G40890; TAIR:AT2G40890; TAIR:AT2G40890	PF00067.15	p450	Domain	IPR001128	Cytochrome P450	Molecular Function: monooxygenase activity (GO:0004497), Molecular Function: iron ion binding (GO:0005506), Molecular Function: electron carrier activity (GO:0009055), Molecular Function: heme binding (GO:0020037)	Q33AD0	NA	NA	NA	LOC_Os10g12050	PWY-361	phenylpropanoid biosynthesis	RXN-2581	EC-1.14.13.36	GN7F-31830-MONOMER	5-<i>O-</i>(4-coumaroyl)-<small>D</small>-quinate 3'-monooxygenase	GN7F-31830	LOC_Os10g12050.1
XLOC_007372	XLOC_007372	LOC_Os10g17489	Chr10:8815241-8827699	2.39822	11.3171	2.23848	2.91456	0.01145	0.297498	no	UDP-glucoronosyl and UDP-glucosyl transferase domain containing protein, expressed	GO:0005575; GO:0016740; GO:0008152	cellular_component; molecular_function; biological_process	cellular_component; transferase activity; metabolic process	TAIR:AT3G02100; TAIR:AT3G02100; TAIR:AT3G02100	PF00201.11	UDPGT	Family	N/A	N/A	N/A	Q109V9	4348311;	NP_001064343.1;	osa:4348311;	LOC_Os10g17489	PWY-6949	DIBOA-glucoside biosynthesis	RXN-7021	EC-2.4.1.202	GN7F-23517-MONOMER	2,4-dihydroxy-7-methoxy-2<i>H-</i>1,4-benzoxazin-3(4<i>H</i>)-one 2 -<small>D</small>-glucosyltransferase	GN7F-23517	LOC_Os10g18530.1
XLOC_007462	XLOC_007462	LOC_Os10g19970	Chr10:10022475-10023451	0.990956	9.27971	3.22719	2.9233	0.0264	0.459697	no	expressed protein	NA	NA	NA	NA	NA	NA	NA	N/A	N/A	N/A	Q339P2	NA	NA	NA	LOC_Os10g19970	NA	NA	NA	NA	NA	NA	NA	NA
XLOC_007523	XLOC_007523	LOC_Os10g21272	Chr10:10862828-10863469	40.9855	370.642	3.17684	4.78795	5e-05	0.0117035	yes	expressed protein	NA	NA	NA	NA	NA	NA	NA	NA	NA	NA	NA	NA	NA	NA	LOC_Os10g21272	NA	NA	NA	NA	NA	NA	NA	NA
XLOC_007541	XLOC_007541	LOC_Os10g21418	Chr10:10918584-10920789	32.1159	192.905	2.58653	3.71858	0.00045	0.0499057	yes	NADPH-dependent oxidoreductase, putative, expressed	GO:0003824; GO:0008152; GO:0015979; GO:0009536	molecular_function; biological_process; biological_process; cellular_component	catalytic activity; metabolic process; photosynthesis; plastid	TAIR:ATCG01010; TAIR:ATCG01010; TAIR:ATCG01010; TAIR:ATCG01010	PF01010.12	Oxidored_q1_C	Family	IPR002128	NADH:ubiquinone/plastoquinone oxidoreductase, chloroplast chain 5, C-terminal	Molecular Function: NADH dehydrogenase (ubiquinone) activity (GO:0008137), Biological Process: ATP synthesis coupled electron transport (GO:0042773), Biological Process: oxidation reduction (GO:0055114)	NA	NA	NA	NA	LOC_Os10g21418	NA	NA	NA	NA	NA	NA	NA	NA
XLOC_007621	XLOC_007621	LOC_Os10g23050	Chr10:12015872-12017745	0.389953	8.27295	4.40703	3.9595	0.0385	0.548788	no	helix-loop-helix DNA-binding protein, putative, expressed	GO:0003677; GO:0005634; GO:0009058; GO:0006139; GO:0003700	molecular_function; cellular_component; biological_process; biological_process; molecular_function	DNA binding; nucleus; biosynthetic process; nucleobase, nucleoside, nucleotide and nucleic acid metabolic process; sequence-specific DNA binding transcription factor activity	TAIR:AT1G72210; TAIR:AT1G72210; TAIR:AT1G72210; TAIR:AT1G72210; TAIR:AT1G72210	PF00010.19	HLH	Domain	IPR001092	Helix-loop-helix DNA-binding domain	Molecular Function: transcription regulator activity (GO:0030528), Biological Process: regulation of transcription (GO:0045449)	Q7XF89	4348490;	NP_001064473.1;	osa:4348490;	LOC_Os10g23050	NA	NA	NA	NA	NA	NA	NA	NA
XLOC_007797	XLOC_007797	LOC_Os10g28080,LOC_Os10g28120	Chr10:14589925-14603702	9.67994	55.3554	2.51565	3.81143	0.0006	0.0580256	no	glycosyl hydrolase, putative, expressed	NA	NA	NA	NA	PF00704.21	Glyco_hydro_18	Domain	IPR000677	2S globulin	N/A	Q9FYR9	4348633;	NP_001064607.1;	osa:4348633;	LOC_Os10g28080	PWY-6902	chitin degradation II	3.2.1.14-RXN	EC-3.2.1.14	GN7F-19617-MONOMER	chitinase	GN7F-19617	LOC_Os10g28050.1
XLOC_007907	XLOC_007907	LOC_Os10g30450	Chr10:15827043-15828826	1.12606	5.62073	2.31948	2.40204	0.04575	0.587279	no	heavy-metal-associated domain-containing protein, putative, expressed	GO:0005488; GO:0006810	molecular_function; biological_process	binding; transport	TAIR:AT5G60800; TAIR:AT5G60800	PF00403.19	HMA	Domain	N/A	N/A	N/A	Q7XE25	NA	NA	NA	LOC_Os10g30450	NA	NA	NA	NA	NA	NA	NA	NA
XLOC_008006	XLOC_008006	LOC_Os10g33040	Chr10:17312260-17317922	1.55699	8.75412	2.4912	3.54051	0.00235	0.133385	no	receptor-like protein kinase precursor, putative, expressed	GO:0005623; GO:0007165; GO:0016301; GO:0000166; GO:0006464	cellular_component; biological_process; molecular_function; molecular_function; biological_process	cell; signal transduction; kinase activity; nucleotide binding; protein modification process	TAIR:AT1G35710; TAIR:AT1G35710; TAIR:AT1G35710; TAIR:AT1G35710; TAIR:AT1G35710	PF00560.26	LRR_1	Repeat	IPR003591	Leucine-rich repeat, typical subtype	N/A	Q337M0	4348855;	NP_001064813.1;	osa:4348855;	LOC_Os10g33040	NA	NA	NA	NA	NA	NA	NA	NA
XLOC_008012	XLOC_008012	LOC_Os10g33210	Chr10:17415601-17420957	1.89832	13.1198	2.78895	3.70246	0.0024	0.134634	no	peptide transporter PTR3-A, putative, expressed	GO:0016020; GO:0005215; GO:0006950; GO:0009607; GO:0009719; GO:0006810; GO:0009628; GO:0008150	cellular_component; molecular_function; biological_process; biological_process; biological_process; biological_process; biological_process; biological_process	membrane; transporter activity; response to stress; response to biotic stimulus; response to endogenous stimulus; transport; response to abiotic stimulus; biological_process	TAIR:AT5G46050; TAIR:AT5G46050; TAIR:AT5G46050; TAIR:AT5G46050; TAIR:AT5G46050; TAIR:AT5G46050; TAIR:AT5G46050; TAIR:AT5G46050	PF00854.14	PTR2	Family	N/A	N/A	N/A	Q337L5	4348866;	NP_001064823.1;	osa:4348866;	LOC_Os10g33210	NA	NA	NA	NA	NA	NA	NA	NA
XLOC_008099	XLOC_008099	LOC_Os10g34940	Chr10:18656497-18660544	1.05504	16.2299	3.94328	4.04485	0.00245	0.135997	no	expressed protein	NA	NA	NA	NA	NA	NA	NA	N/A	N/A	N/A	Q337I2	NA	NA	NA	LOC_Os10g34940	NA	NA	NA	NA	NA	NA	NA	NA
XLOC_008123	XLOC_008123	LOC_Os10g35460	Chr10:18976008-18979110	2.14875	10.9355	2.34745	2.95306	0.00955	0.272489	no	COBRA, putative, expressed	GO:0016043; GO:0009987; GO:0005886; GO:0016020; GO:0005623; GO:0003674; GO:0005618; GO:0016049; GO:0006950; GO:0009628	biological_process; biological_process; cellular_component; cellular_component; cellular_component; molecular_function; cellular_component; biological_process; biological_process; biological_process	cellular component organization; cellular process; plasma membrane; membrane; cell; molecular_function; cell wall; cell growth; response to stress; response to abiotic stimulus	TAIR:AT5G60920; TAIR:AT5G60920; TAIR:AT5G60920; TAIR:AT5G60920; TAIR:AT5G60920; TAIR:AT5G60920; TAIR:AT5G60920; TAIR:AT5G60920; TAIR:AT5G60920; TAIR:AT5G60920	PF04833.8	COBRA	Family	IPR006918	Glycosyl-phosphatidyl inositol-anchored, plant	N/A	Q8W3E8	4349011;	NP_001064961.1;	osa:4349011;	LOC_Os10g35460	NA	NA	NA	NA	NA	NA	NA	NA
XLOC_008171	XLOC_008171	LOC_Os10g36480	Chr10:19525612-19528549	3.28722	13.2792	2.01423	2.33652	0.0343	0.518716	no	expressed protein	GO:0003674; GO:0005575; GO:0008150	molecular_function; cellular_component; biological_process	molecular_function; cellular_component; biological_process	TAIR:AT5G51510; TAIR:AT5G51510; TAIR:AT5G51510	PF07086.5	DUF1352	Family	N/A	N/A	N/A	Q7G282	NA	NA	NA	LOC_Os10g36480	NA	NA	NA	NA	NA	NA	NA	NA
XLOC_008249	XLOC_008249	LOC_Os10g38360	Chr10:20498003-20499097	2.56015	14.1436	2.46585	2.87517	0.01495	0.342658	no	glutathione S-transferase, putative, expressed	GO:0016740; GO:0009056; GO:0009987; GO:0019748; GO:0008152; GO:0005737	molecular_function; biological_process; biological_process; biological_process; biological_process; cellular_component	transferase activity; catabolic process; cellular process; secondary metabolic process; metabolic process; cytoplasm	TAIR:AT1G10360; TAIR:AT1G10360; TAIR:AT1G10360; TAIR:AT1G10360; TAIR:AT1G10360; TAIR:AT1G10360	PF00043.18	GST_C	Domain	IPR004046	Glutathione S-transferase, C-terminal	N/A	Q945W6	4349185;	NP_001065119.1;	osa:4349185;	LOC_Os10g38360	NA	NA	NA	NA	NA	NA	NA	NA
XLOC_008257	XLOC_008257	LOC_Os10g38489	Chr10:20553537-20560790	10.0267	48.0573	2.26091	3.35432	0.00115	0.0872812	no	glutathione S-transferase GSTU6, putative, expressed	GO:0016740; GO:0008152; GO:0009987; GO:0009056; GO:0019748; GO:0009628; GO:0009719; GO:0009791; GO:0005737; GO:0009536	molecular_function; biological_process; biological_process; biological_process; biological_process; biological_process; biological_process; biological_process; cellular_component; cellular_component	transferase activity; metabolic process; cellular process; catabolic process; secondary metabolic process; response to abiotic stimulus; response to endogenous stimulus; post-embryonic development; cytoplasm; plastid	TAIR:AT1G10370; TAIR:AT1G10370; TAIR:AT1G10370; TAIR:AT1G10370; TAIR:AT1G10370; TAIR:AT1G10370; TAIR:AT1G10370; TAIR:AT1G10370; TAIR:AT1G10370; TAIR:AT1G10370	PF00043.18	GST_C	Domain	N/A	N/A	N/A	Q9FUE3;; Q8S703	4349190;;; 4349188;	NP_001065122.1;;; NP_001065124.1;	osa:4349188;;; osa:4349190;	LOC_Os10g38489	NA	NA	NA	NA	NA	NA	NA	NA
XLOC_008290	XLOC_008290	LOC_Os10g39100	Chr10:20842835-20845276	1.09705	7.95848	2.85886	3.00127	0.022	0.420296	no	uncharacterized Cys-rich domain containing protein, putative, expressed	GO:0016020; GO:0005886	cellular_component; cellular_component	membrane; plasma membrane	TAIR:AT1G63830; TAIR:AT1G63830	PF04749.10	PLAC8	Family	IPR006461	Protein of unknown function Cys-rich	N/A	Q8W2X9	NA	NA	NA	LOC_Os10g39100	NA	NA	NA	NA	NA	NA	NA	NA
XLOC_008327	XLOC_008327	LOC_Os10g39680,LOC_Os10g39700	Chr10:21205699-21222247	4.30064	82.3545	4.25922	5.39925	0.0003	0.0400758	yes	CHIT14 - Chitinase family protein precursor, expressed	GO:0006950; GO:0009607; GO:0008152; GO:0005773; GO:0016020; GO:0008150; GO:0005829; GO:0007165; GO:0009719; GO:0016787	biological_process; biological_process; biological_process; cellular_component; cellular_component; biological_process; cellular_component; biological_process; biological_process; molecular_function	response to stress; response to biotic stimulus; metabolic process; vacuole; membrane; biological_process; cytosol; signal transduction; response to endogenous stimulus; hydrolase activity	TAIR:AT3G12500; TAIR:AT3G12500; TAIR:AT3G12500; TAIR:AT3G12500; TAIR:AT3G12500; TAIR:AT3G12500; TAIR:AT3G12500; TAIR:AT3G12500; TAIR:AT3G12500; TAIR:AT3G12500	PF00182.12	Glyco_hydro_19	Domain	N/A	N/A	N/A	Q7XCK6	4349267;	NP_001065196.1;	osa:4349267;	LOC_Os10g39680	NA	NA	NA	NA	NA	NA	NA	NA
XLOC_008374	XLOC_008374	LOC_Os10g40640	Chr10:21798919-21804353	1.04431	10.993	3.39597	3.61411	0.01085	0.292243	no	glycosyl transferase 8 domain containing protein, putative, expressed	GO:0005623; GO:0016740; GO:0009058; GO:0005975	cellular_component; molecular_function; biological_process; biological_process	cell; transferase activity; biosynthetic process; carbohydrate metabolic process	TAIR:AT4G16600; TAIR:AT4G16600; TAIR:AT4G16600; TAIR:AT4G16600	PF01501.13	Glyco_transf_8	Family	IPR002495	Glycosyl transferase, family 8	Molecular Function: transferase activity, transferring glycosyl groups (GO:0016757)	Q9AV15	4349343;	NP_001065345.1;	osa:4349343;	LOC_Os10g40640	NA	NA	NA	NA	NA	NA	NA	NA
XLOC_008402	XLOC_008402	LOC_Os10g41330	Chr10:22213114-22214678	0.640524	11.1412	4.12051	3.77503	0.0099	0.278421	no	AP2 domain containing protein, expressed	GO:0003677; GO:0005634; GO:0008150; GO:0009058; GO:0006139; GO:0003700; GO:0003677; GO:0005634; GO:0008150; GO:0009058; GO:0006139; GO:0003700	molecular_function; cellular_component; biological_process; biological_process; biological_process; molecular_function; molecular_function; cellular_component; biological_process; biological_process; biological_process; molecular_function	DNA binding; nucleus; biological_process; biosynthetic process; nucleobase, nucleoside, nucleotide and nucleic acid metabolic process; sequence-specific DNA binding transcription factor activity; DNA binding; nucleus; biological_process; biosynthetic process; nucleobase, nucleoside, nucleotide and nucleic acid metabolic process; sequence-specific DNA binding transcription factor activity	TAIR:AT5G51190; TAIR:AT5G51190; TAIR:AT5G51190; TAIR:AT5G51190; TAIR:AT5G51190; TAIR:AT5G51190; TAIR:AT5G51190; TAIR:AT5G51190; TAIR:AT5G51190; TAIR:AT5G51190; TAIR:AT5G51190; TAIR:AT5G51190	PF00847.13	AP2	Domain	N/A	N/A	N/A	Q9AQU3	4349395;	NP_001065396.1;	osa:4349395;	LOC_Os10g41330	NA	NA	NA	NA	NA	NA	NA	NA
XLOC_008433	XLOC_008433	LOC_Os10g41980	Chr10:22575211-22576531	2.37997	18.0813	2.92548	3.01916	0.022	0.420296	no	RALFL26 - Rapid ALkalinization Factor RALF family protein precursor, expressed	NA	NA	NA	NA	NA	NA	NA	N/A	N/A	N/A	Q7XBZ4	4349448;	NP_001065448.1;	osa:4349448;	LOC_Os10g41980	NA	NA	NA	NA	NA	NA	NA	NA
XLOC_008533	XLOC_008533	LOC_Os10g02070	Chr10:677085-678882	1.0211	5.64442	2.4667	2.4828	0.03905	0.551748	no	peroxidase precursor, putative, expressed	GO:0006950; GO:0005488; GO:0005634; GO:0003824; GO:0008152; GO:0005737	biological_process; molecular_function; cellular_component; molecular_function; biological_process; cellular_component	response to stress; binding; nucleus; catalytic activity; metabolic process; cytoplasm	TAIR:AT5G19890; TAIR:AT5G19890; TAIR:AT5G19890; TAIR:AT5G19890; TAIR:AT5G19890; TAIR:AT5G19890	PF00141.16	peroxidase	Family	IPR002016	Haem peroxidase, plant/fungal/bacterial	Molecular Function: peroxidase activity (GO:0004601), Biological Process: response to oxidative stress (GO:0006979), Molecular Function: heme binding (GO:0020037), Biological Process: oxidation reduction (GO:0055114)	Q7XHB1	4347963;	NP_001064031.1;	osa:4347963;	LOC_Os10g02070	NA	NA	NA	NA	NA	NA	NA	NA
XLOC_008628	XLOC_008628	LOC_Os10g03840,LOC_Os10g03850	Chr10:1740987-1752161	1.85937	8.38991	2.17384	2.30273	0.02015	0.399676	no	expressed protein	NA	NA	NA	NA	NA	NA	NA	N/A	N/A	N/A	Q33B98	NA	NA	NA	LOC_Os10g03840	NA	NA	NA	NA	NA	NA	NA	NA
XLOC_009323	XLOC_009323	LOC_Os10g21194	Chr10:10808861-10810490	0.785267	6.4384	3.03545	3.12256	0.01985	0.39715	no	maturase K, putative, expressed	GO:0016740; GO:0003723; GO:0008152; GO:0006139; GO:0009536	molecular_function; molecular_function; biological_process; biological_process; cellular_component	transferase activity; RNA binding; metabolic process; nucleobase, nucleoside, nucleotide and nucleic acid metabolic process; plastid	TAIR:ATCG00040; TAIR:ATCG00040; TAIR:ATCG00040; TAIR:ATCG00040; TAIR:ATCG00040	PF01348.14	Intron_maturas2	Family	IPR000442	Intron maturase, type II	Biological Process: RNA splicing (GO:0008380)	NA	NA	NA	NA	LOC_Os10g21194	NA	NA	NA	NA	NA	NA	NA	NA
XLOC_009334	XLOC_009334	LOC_Os10g21314	Chr10:10873462-10873822	10.6073	60.5322	2.51264	2.96724	0.01345	0.323558	no	chloroplast 50S ribosomal protein L20, putative, expressed	GO:0005840; GO:0009536; GO:0006412; GO:0005198	cellular_component; cellular_component; biological_process; molecular_function	ribosome; plastid; translation; structural molecule activity	TAIR:ATCG00660; TAIR:ATCG00660; TAIR:ATCG00660; TAIR:ATCG00660	PF00453.11	Ribosomal_L20	Family	IPR005813	Ribosomal protein L20	Molecular Function: structural constituent of ribosome (GO:0003735), Cellular Component: intracellular (GO:0005622), Cellular Component: ribosome (GO:0005840), Biological Process: translation (GO:0006412), Molecular Function: rRNA binding (GO:0019843)	NA	NA	NA	NA	LOC_Os10g21314	NA	NA	NA	NA	NA	NA	NA	NA
XLOC_009335	XLOC_009335	LOC_Os10g21300	Chr10:10874744-10875395	23.8491	107.702	2.17503	3.3361	0.00165	0.107494	no	ATP-dependent Clp protease proteolytic subunit, putative, expressed	GO:0009536; GO:0016020; GO:0009579; GO:0019538; GO:0016787	cellular_component; cellular_component; cellular_component; biological_process; molecular_function	plastid; membrane; thylakoid; protein metabolic process; hydrolase activity	TAIR:ATCG00670; TAIR:ATCG00670; TAIR:ATCG00670; TAIR:ATCG00670; TAIR:ATCG00670	PF00574.16	CLP_protease	Domain	IPR001907	Peptidase S14, ClpP	Molecular Function: serine-type endopeptidase activity (GO:0004252), Biological Process: proteolysis (GO:0006508)	Q8LM62	4341440;	NP_001057994.1;	osa:4341440;	LOC_Os10g21300	NA	NA	NA	NA	NA	NA	NA	NA
XLOC_009340	XLOC_009340	LOC_Os10g21346	Chr10:10886436-10887209	5.80311	33.3044	2.52081	3.25413	0.00675	0.225	no	chloroplast 30S ribosomal protein S3, putative, expressed	GO:0016020; GO:0005840; GO:0009536; GO:0006412; GO:0005198; GO:0005622	cellular_component; cellular_component; cellular_component; biological_process; molecular_function; cellular_component	membrane; ribosome; plastid; translation; structural molecule activity; intracellular	TAIR:ATCG00800; TAIR:ATCG00800; TAIR:ATCG00800; TAIR:ATCG00800; TAIR:ATCG00800; TAIR:ATCG00800	PF00189.13	Ribosomal_S3_C	Domain	IPR001351	Ribosomal protein S3, C-terminal	Molecular Function: structural constituent of ribosome (GO:0003735), Cellular Component: intracellular (GO:0005622), Cellular Component: ribosome (GO:0005840), Biological Process: translation (GO:0006412)	NA	NA	NA	NA	LOC_Os10g21346	NA	NA	NA	NA	NA	NA	NA	NA
XLOC_009354	XLOC_009354	LOC_Os10g21590	Chr10:11053035-11057745	0.893536	4.52427	2.34009	2.53343	0.02335	0.431592	no	transporter family protein, putative, expressed	GO:0006810; GO:0016020; GO:0009987; GO:0005215; GO:0006810; GO:0016020; GO:0009987; GO:0005215	biological_process; cellular_component; biological_process; molecular_function; biological_process; cellular_component; biological_process; molecular_function	transport; membrane; cellular process; transporter activity; transport; membrane; cellular process; transporter activity	TAIR:AT2G18480; TAIR:AT2G18480; TAIR:AT2G18480; TAIR:AT2G18480; TAIR:AT2G18480; TAIR:AT2G18480; TAIR:AT2G18480; TAIR:AT2G18480	PF00083.17	Sugar_tr	Family	N/A	N/A	N/A	Q8W2W8	4348440;	NP_001064429.1;	osa:4348440;	LOC_Os10g21590	NA	NA	NA	NA	NA	NA	NA	NA
XLOC_009459	XLOC_009459	LOC_Os10g24450	Chr10:12411282-12572989	17.145	70.4151	2.0381	2.10379	0.0478	0.599199	no	NA	NA	NA	NA	NA	PF00665.19	rve	Domain	IPR001584	Integrase, catalytic core	Molecular Function: DNA binding (GO:0003677), Biological Process: DNA integration (GO:0015074)	Q8SB48	NA	NA	NA	LOC_Os10g24450	NA	NA	NA	NA	NA	NA	NA	NA
XLOC_009516	XLOC_009516	LOC_Os10g25290	Chr10:13069728-13070894	3.23875	13.0217	2.0074	2.32309	0.03645	0.532506	no	ZIM domain containing protein, putative, expressed	GO:0006950; GO:0005515; GO:0009719	biological_process; molecular_function; biological_process	response to stress; protein binding; response to endogenous stimulus	TAIR:AT1G74950; TAIR:AT1G74950; TAIR:AT1G74950	PF09425.3	CCT_2	Motif	IPR018467	CCT domain-like	N/A	Q7XEZ1	4348533;	NP_001064513.1;	osa:4348533;	LOC_Os10g25290	NA	NA	NA	NA	NA	NA	NA	NA
XLOC_009525	XLOC_009525	LOC_Os10g25550	Chr10:13219949-13226158	1.36606	7.36103	2.42988	2.68832	0.01815	0.382524	no	tyrosine protein kinase domain containing protein, putative, expressed	GO:0005575; GO:0008152; GO:0009987; GO:0016301; GO:0006950; GO:0009607	cellular_component; biological_process; biological_process; molecular_function; biological_process; biological_process	cellular_component; metabolic process; cellular process; kinase activity; response to stress; response to biotic stimulus	TAIR:AT2G05940; TAIR:AT2G05940; TAIR:AT2G05940; TAIR:AT2G05940; TAIR:AT2G05940; TAIR:AT2G05940	PF07714.10	Pkinase_Tyr	Domain	N/A	N/A	N/A	Q8L4T2	4348546;	NP_001064525.1;	osa:4348546;	LOC_Os10g25550	NA	NA	NA	NA	NA	NA	NA	NA
XLOC_009638	XLOC_009638	LOC_Os10g28350	Chr10:14751949-14754326	4.1593	28.3171	2.76726	3.5343	0.00335	0.159797	no	1,2-dihydroxy-3-keto-5-methylthiopentene dioxygenase protein, putative, expressed	GO:0005488; GO:0003824; GO:0005829; GO:0009058; GO:0009987; GO:0008152	molecular_function; molecular_function; cellular_component; biological_process; biological_process; biological_process	binding; catalytic activity; cytosol; biosynthetic process; cellular process; metabolic process	TAIR:AT4G14710; TAIR:AT4G14710; TAIR:AT4G14710; TAIR:AT4G14710; TAIR:AT4G14710; TAIR:AT4G14710	PF03079.7	ARD	Family	IPR011051	Cupin, RmlC-type	N/A	A1L4T4	4348646;	NP_001064618.1;	osa:4348646;	LOC_Os10g28350	NA	NA	NA	NA	NA	NA	NA	NA
XLOC_009797	XLOC_009797	LOC_Os10g31850	Chr10:16704942-16708495	5.25964	49.1086	3.22294	4.51922	0.0001	0.0199623	yes	RING finger and CHY zinc finger domain-containing protein 1, putative, expressed	GO:0005488; GO:0005488; GO:0005488	molecular_function; molecular_function; molecular_function	binding; binding; binding	TAIR:AT5G22920; TAIR:AT5G22920; TAIR:AT5G22920	PF05495.5	zf-CHY	Domain	IPR008913	Zinc finger, CHY-type	Molecular Function: zinc ion binding (GO:0008270)	Q7XDQ1;; Q337P2;; Q337P1;; Q337P0	4348796;	NP_001064757.1;	osa:4348796;	LOC_Os10g31850	NA	NA	NA	NA	NA	NA	NA	NA
XLOC_009854	XLOC_009854	LOC_Os10g33080,LOC_Os10g33130	Chr10:17331233-17361919	0.211268	1.43419	2.76308	2.55271	0.0327	0.507133	no	leucine-rich repeat receptor protein kinase EXS precursor, putative, expressed	GO:0005623; GO:0007165; GO:0016301; GO:0000166; GO:0006464	cellular_component; biological_process; molecular_function; molecular_function; biological_process	cell; signal transduction; kinase activity; nucleotide binding; protein modification process	TAIR:AT1G35710; TAIR:AT1G35710; TAIR:AT1G35710; TAIR:AT1G35710; TAIR:AT1G35710	PF00560.26	LRR_1	Repeat	N/A	N/A	N/A	Q7XDK0	NA	NA	NA	LOC_Os10g33080	NA	NA	NA	NA	NA	NA	NA	NA
XLOC_009913	XLOC_009913	LOC_Os10g34350	Chr10:18311850-18314336	1.61634	6.59137	2.02785	2.23952	0.0299	0.487322	no	aminotransferase, classes I and II, domain containing protein, expressed	GO:0009058; GO:0009987; GO:0016740; GO:0008152; GO:0009056; GO:0003824; GO:0005488	biological_process; biological_process; molecular_function; biological_process; biological_process; molecular_function; molecular_function	biosynthetic process; cellular process; transferase activity; metabolic process; catabolic process; catalytic activity; binding	TAIR:AT1G77670; TAIR:AT1G77670; TAIR:AT1G77670; TAIR:AT1G77670; TAIR:AT1G77670; TAIR:AT1G77670; TAIR:AT1G77670	PF00155.14	Aminotran_1_2	Domain	IPR004839	Aminotransferase, class I/classII	Biological Process: biosynthetic process (GO:0009058), Molecular Function: transferase activity, transferring nitrogenous groups (GO:0016769), Molecular Function: pyridoxal phosphate binding (GO:0030170)	Q7XDA3	4348936;	NP_001064890.1;	osa:4348936;	LOC_Os10g34350	NA	NA	NA	NA	NA	NA	NA	NA
XLOC_009940	XLOC_009940	LOC_Os10g34910	Chr10:18635338-18636174	2.15925	10.1941	2.23913	2.31	0.0478	0.599199	no	secretory protein, putative, expressed	GO:0005623; GO:0006950	cellular_component; biological_process	cell; response to stress	TAIR:AT2G15220; TAIR:AT2G15220	PF04450.5	BSP	Family	N/A	N/A	N/A	Q7XD55	4348972;	NP_001064924.1;	osa:4348972;	LOC_Os10g34910	NA	NA	NA	NA	NA	NA	NA	NA
XLOC_010055	XLOC_010055	LOC_Os10g37340	Chr10:19997768-20004599	2.06654	36.2463	4.13254	3.62644	0.00375	0.171013	no	cystathionine gamma-synthase, putative, expressed	GO:0008152; GO:0003824; GO:0009987; GO:0005829; GO:0009056	biological_process; molecular_function; biological_process; cellular_component; biological_process	metabolic process; catalytic activity; cellular process; cytosol; catabolic process	TAIR:AT1G64660; TAIR:AT1G64660; TAIR:AT1G64660; TAIR:AT1G64660; TAIR:AT1G64660	PF01053.13	Cys_Met_Meta_PP	Domain	N/A	N/A	N/A	Q7XCS3	4349123;	NP_001065069.1;	osa:4349123;	LOC_Os10g37340	NA	NA	NA	NA	NA	NA	NA	NA
XLOC_010214	XLOC_010214	LOC_Os10g40934	Chr10:21988357-21993690	7.38152	86.1039	3.54409	4.96479	5e-05	0.0117035	yes	flavonol synthase/flavanone 3-hydroxylase, putative, expressed	GO:0005575; GO:0007275; GO:0003824; GO:0009058; GO:0009987; GO:0019748; GO:0008152; GO:0005575; GO:0007275; GO:0003824; GO:0009058; GO:0009987; GO:0019748; GO:0008152; GO:0005575; GO:0007275; GO:0003824; GO:0009058; GO:0009987; GO:0019748; GO:0008152; GO:0005575; GO:0007275; GO:0003824; GO:0009058; GO:0009987; GO:0019748; GO:0008152; GO:0005488; GO:0008152; GO:0003824; GO:0005575; GO:0007275; GO:…	cellular_component; biological_process; molecular_function; biological_process; biological_process; biological_process; biological_process; cellular_component; biological_process; molecular_function; biological_process; biological_process; biological_process; biological_process; cellular_component; biological_process; molecular_function; biological_process; biological_process; biological_process;…	cellular_component; multicellular organismal development; catalytic activity; biosynthetic process; cellular process; secondary metabolic process; metabolic process; cellular_component; multicellular organismal development; catalytic activity; biosynthetic process; cellular process; secondary metabolic process; metabolic process; cellular_component; multicellular organismal development; catalytic…	TAIR:AT1G17020; TAIR:AT1G17020; TAIR:AT1G17020; TAIR:AT1G17020; TAIR:AT1G17020; TAIR:AT1G17020; TAIR:AT1G17020; TAIR:AT1G17020; TAIR:AT1G17020; TAIR:AT1G17020; TAIR:AT1G17020; TAIR:AT1G17020; TAIR:AT1G17020; TAIR:AT1G17020; TAIR:AT1G17020; TAIR:AT1G17020; TAIR:AT1G17020; TAIR:AT1G17020; TAIR:AT1G17020; TAIR:AT1G17020; TAIR:AT1G17020; TAIR:AT1G17020; TAIR:AT1G17020; TAIR:AT1G17020; TAIR:AT1G17020;…	PF03171.13	2OG-FeII_Oxy	Domain	N/A	N/A	N/A	Q336T0;; Q108Z0;; Q336T3;; Q336T2;; Q108Y9;; Q336T1;; Q108Z2;; Q94LP4	4349363;;; 9268649;	NP_001065365.1;;; NP_001176271.1;	osa:4349363;;; osa:9268649;	LOC_Os10g40934	NA	NA	NA	NA	NA	NA	NA	NA
XLOC_010246	XLOC_010246	LOC_Os10g41550	Chr10:22324158-22327665	0.905288	8.83268	3.2864	3.5643	0.0074	0.237681	no	beta-amylase, putative, expressed	GO:0008152; GO:0006950; GO:0009628; GO:0016787; GO:0005975; GO:0009987; GO:0009056; GO:0009058; GO:0009536	biological_process; biological_process; biological_process; molecular_function; biological_process; biological_process; biological_process; biological_process; cellular_component	metabolic process; response to stress; response to abiotic stimulus; hydrolase activity; carbohydrate metabolic process; cellular process; catabolic process; biosynthetic process; plastid	TAIR:AT4G17090; TAIR:AT4G17090; TAIR:AT4G17090; TAIR:AT4G17090; TAIR:AT4G17090; TAIR:AT4G17090; TAIR:AT4G17090; TAIR:AT4G17090; TAIR:AT4G17090	PF01373.10	Glyco_hydro_14	Domain	N/A	N/A	N/A	Q9AY35	NA	NA	NA	LOC_Os10g41550	NA	NA	NA	NA	NA	NA	NA	NA
XLOC_010284	XLOC_010284	LOC_Os10g42340	Chr10:22788936-22794603	0.860785	5.2366	2.60491	2.86034	0.01145	0.297498	no	expressed protein	NA	NA	NA	NA	NA	NA	NA	N/A	N/A	N/A	Q7XBY0	NA	NA	NA	LOC_Os10g42340	NA	NA	NA	NA	NA	NA	NA	NA
XLOC_010323	XLOC_010323	LOC_Os10g43060	Chr10:23192341-23195088	1.38915	9.06217	2.70565	3.07681	0.01345	0.323558	no	expressed protein	GO:0003674; GO:0005575; GO:0008150	molecular_function; cellular_component; biological_process	molecular_function; cellular_component; biological_process	TAIR:AT4G25030; TAIR:AT4G25030; TAIR:AT4G25030	NA	NA	NA	N/A	N/A	N/A	Q7XBR1	4349524;	NP_001065517.1;	osa:4349524;	LOC_Os10g43060	NA	NA	NA	NA	NA	NA	NA	NA
XLOC_010440	XLOC_010440	LOC_Os11g03300	Chr11:1233927-1236052	0.524577	2.90208	2.46786	2.2284	0.04255	0.572601	no	NAC domain transcription factor, putative, expressed	GO:0005575; GO:0009058; GO:0006139; GO:0007275; GO:0003700	cellular_component; biological_process; biological_process; biological_process; molecular_function	cellular_component; biosynthetic process; nucleobase, nucleoside, nucleotide and nucleic acid metabolic process; multicellular organismal development; sequence-specific DNA binding transcription factor activity	TAIR:AT1G61110; TAIR:AT1G61110; TAIR:AT1G61110; TAIR:AT1G61110; TAIR:AT1G61110	PF02365.8	NAM	Family	N/A	N/A	N/A	Q2RB40;; B7EG48	NA	NA	NA	LOC_Os11g03300	NA	NA	NA	NA	NA	NA	NA	NA
XLOC_010445	XLOC_010445	LOC_Os11g03370	Chr11:1269313-1271303	0.537796	7.85016	3.86759	3.81467	0.0137	0.325137	no	no apical meristem protein, putative, expressed	GO:0005634; GO:0009058; GO:0006139; GO:0007275; GO:0003700; GO:0005737	cellular_component; biological_process; biological_process; biological_process; molecular_function; cellular_component	nucleus; biosynthetic process; nucleobase, nucleoside, nucleotide and nucleic acid metabolic process; multicellular organismal development; sequence-specific DNA binding transcription factor activity; cytoplasm	TAIR:AT5G18270; TAIR:AT5G18270; TAIR:AT5G18270; TAIR:AT5G18270; TAIR:AT5G18270; TAIR:AT5G18270	PF02365.8	NAM	Family	N/A	N/A	N/A	Q2RB33	4349650;	NP_001065629.1;	osa:4349650;	LOC_Os11g03370	NA	NA	NA	NA	NA	NA	NA	NA
XLOC_010465	XLOC_010465	LOC_Os11g03820	Chr11:1506828-1512512	0.171045	6.42321	5.23085	5.08269	0.01965	0.396599	no	D-mannose binding lectin family protein, expressed	GO:0008152; GO:0009987; GO:0000166; GO:0030246; GO:0016301; GO:0006464; GO:0005515; GO:0005886	biological_process; biological_process; molecular_function; molecular_function; molecular_function; biological_process; molecular_function; cellular_component	metabolic process; cellular process; nucleotide binding; carbohydrate binding; kinase activity; protein modification process; protein binding; plasma membrane	TAIR:AT1G34300; TAIR:AT1G34300; TAIR:AT1G34300; TAIR:AT1G34300; TAIR:AT1G34300; TAIR:AT1G34300; TAIR:AT1G34300; TAIR:AT1G34300	PF11955.1	PORR	Family	IPR021099	RNA recognition domain, plant	N/A	Q2RAY8	NA	NA	NA	LOC_Os11g03820	NA	NA	NA	NA	NA	NA	NA	NA
XLOC_010496	XLOC_010496	LOC_Os11g04560	Chr11:1931409-1932509	0.521908	9.55804	4.19485	3.73608	0.03855	0.548788	no	calmodulin-like protein 1, putative, expressed	GO:0005488; GO:0008150; GO:0005886	molecular_function; biological_process; cellular_component	binding; biological_process; plasma membrane	TAIR:AT3G10190; TAIR:AT3G10190; TAIR:AT3G10190	PF00036.25	efhand	Domain	N/A	N/A	N/A	Q2RAQ9	NA	NA	NA	LOC_Os11g04560	NA	NA	NA	NA	NA	NA	NA	NA
XLOC_010568	XLOC_010568	LOC_Os11g05800	Chr11:2682642-2687848	1.44943	17.0479	3.55603	3.90064	0.00975	0.275668	no	HVA22, putative, expressed	GO:0003674; GO:0008150	molecular_function; biological_process	molecular_function; biological_process	TAIR:AT2G36020; TAIR:AT2G36020	PF03134.12	TB2_DP1_HVA22	Family	N/A	N/A	N/A	Q53ND6	9269077;	NP_001176361.1;	osa:9269077;	LOC_Os11g05800	NA	NA	NA	NA	NA	NA	NA	NA
XLOC_010634	XLOC_010634	LOC_Os11g07120	Chr11:3541119-3545648	0.261036	1.66026	2.66909	2.49194	0.0452	0.586697	no	receptor kinase-like protein, identical, putative, expressed	GO:0007165; GO:0016301; GO:0000166; GO:0006464; GO:0009536; GO:0007165; GO:0016301; GO:0000166; GO:0006464; GO:0009536	biological_process; molecular_function; molecular_function; biological_process; cellular_component; biological_process; molecular_function; molecular_function; biological_process; cellular_component	signal transduction; kinase activity; nucleotide binding; protein modification process; plastid; signal transduction; kinase activity; nucleotide binding; protein modification process; plastid	TAIR:AT3G47090; TAIR:AT3G47090; TAIR:AT3G47090; TAIR:AT3G47090; TAIR:AT3G47090; TAIR:AT3G47090; TAIR:AT3G47090; TAIR:AT3G47090; TAIR:AT3G47090; TAIR:AT3G47090	PF00560.26	LRR_1	Repeat	N/A	N/A	N/A	Q53P87	NA	NA	NA	LOC_Os11g07120	NA	NA	NA	NA	NA	NA	NA	NA
XLOC_010641	XLOC_010641	LOC_Os11g07200	Chr11:3607018-3620662	1.02801	7.62956	2.89174	3.69268	0.0039	0.175434	no	receptor protein kinase CLAVATA1 precursor, putative, expressed	GO:0007165; GO:0006950; GO:0016301; GO:0004872; GO:0004871; GO:0000166; GO:0006464; GO:0005623; GO:0009605; GO:0009607; GO:0006810; GO:0009987; GO:0005515; GO:0008219; GO:0007165; GO:0006950; GO:0016301; GO:0004872; GO:0004871; GO:0000166; GO:0006464; GO:0005623; GO:0009605; GO:0009607; GO:0006810; GO:0009987; GO:0005515; GO:0008219	biological_process; biological_process; molecular_function; molecular_function; molecular_function; molecular_function; biological_process; cellular_component; biological_process; biological_process; biological_process; biological_process; molecular_function; biological_process; biological_process; biological_process; molecular_function; molecular_function; molecular_function; molecular_function;…	signal transduction; response to stress; kinase activity; receptor activity; signal transducer activity; nucleotide binding; protein modification process; cell; response to external stimulus; response to biotic stimulus; transport; cellular process; protein binding; cell death; signal transduction; response to stress; kinase activity; receptor activity; signal transducer activity; nucleotide bind…	TAIR:AT5G20480; TAIR:AT5G20480; TAIR:AT5G20480; TAIR:AT5G20480; TAIR:AT5G20480; TAIR:AT5G20480; TAIR:AT5G20480; TAIR:AT5G20480; TAIR:AT5G20480; TAIR:AT5G20480; TAIR:AT5G20480; TAIR:AT5G20480; TAIR:AT5G20480; TAIR:AT5G20480; TAIR:AT5G20480; TAIR:AT5G20480; TAIR:AT5G20480; TAIR:AT5G20480; TAIR:AT5G20480; TAIR:AT5G20480; TAIR:AT5G20480; TAIR:AT5G20480; TAIR:AT5G20480; TAIR:AT5G20480; TAIR:AT5G20480;…	PF08263.5	LRRNT_2	Family	IPR003591	Leucine-rich repeat, typical subtype	N/A	Q53PD5	NA	NA	NA	LOC_Os11g07200	NA	NA	NA	NA	NA	NA	NA	NA
XLOC_010846	XLOC_010846	LOC_Os11g11940	Chr11:6621641-6629013	0.84301	4.38931	2.38037	2.82665	0.01615	0.358663	no	MLA10, putative, expressed	GO:0006950; GO:0009607; GO:0008219; GO:0000166; GO:0005886; GO:0005737	biological_process; biological_process; biological_process; molecular_function; cellular_component; cellular_component	response to stress; response to biotic stimulus; cell death; nucleotide binding; plasma membrane; cytoplasm	TAIR:AT3G46530; TAIR:AT3G46530; TAIR:AT3G46530; TAIR:AT3G46530; TAIR:AT3G46530; TAIR:AT3G46530	PF00931.15	NB-ARC	Domain	IPR000767	Disease resistance protein	Biological Process: defense response (GO:0006952)	Q2R8J8	NA	NA	NA	LOC_Os11g11940	NA	NA	NA	NA	NA	NA	NA	NA
XLOC_010867	XLOC_010867	LOC_Os11g12340	Chr11:6888056-6896357	12.4148	70.6016	2.50764	3.79072	5e-05	0.0117035	yes	disease resistance protein RPM1, putative, expressed	GO:0006950; GO:0008219; GO:0005515; GO:0000166; GO:0005886; GO:0006950; GO:0008219; GO:0005515; GO:0000166; GO:0005886	biological_process; biological_process; molecular_function; molecular_function; cellular_component; biological_process; biological_process; molecular_function; molecular_function; cellular_component	response to stress; cell death; protein binding; nucleotide binding; plasma membrane; response to stress; cell death; protein binding; nucleotide binding; plasma membrane	TAIR:AT3G07040; TAIR:AT3G07040; TAIR:AT3G07040; TAIR:AT3G07040; TAIR:AT3G07040; TAIR:AT3G07040; TAIR:AT3G07040; TAIR:AT3G07040; TAIR:AT3G07040; TAIR:AT3G07040	PF00931.15	NB-ARC	Domain	N/A	N/A	N/A	Q9ZQT3	4350133;	NP_001067557.1;	osa:4350133;	LOC_Os11g12340	NA	NA	NA	NA	NA	NA	NA	NA
XLOC_010979	XLOC_010979	LOC_Os11g15040	Chr11:8466740-8469440	12.2692	113.809	3.2135	4.73431	5e-05	0.0117035	yes	S-adenosyl-L-methionine:benzoic acid/salicylic acid carboxyl methyltransferase, putative, expressed	GO:0016740; GO:0008152; GO:0009987; GO:0008150; GO:0016740; GO:0008152; GO:0009987; GO:0008150; GO:0016740; GO:0008152; GO:0009987; GO:0008150; GO:0016740; GO:0008152; GO:0009987; GO:0008150; GO:0016740; GO:0008152; GO:0009987; GO:0008150	molecular_function; biological_process; biological_process; biological_process; molecular_function; biological_process; biological_process; biological_process; molecular_function; biological_process; biological_process; biological_process; molecular_function; biological_process; biological_process; biological_process; molecular_function; biological_process; biological_process; biological_process	transferase activity; metabolic process; cellular process; biological_process; transferase activity; metabolic process; cellular process; biological_process; transferase activity; metabolic process; cellular process; biological_process; transferase activity; metabolic process; cellular process; biological_process; transferase activity; metabolic process; cellular process; biological_process	TAIR:AT5G66430; TAIR:AT5G66430; TAIR:AT5G66430; TAIR:AT5G66430; TAIR:AT5G66430; TAIR:AT5G66430; TAIR:AT5G66430; TAIR:AT5G66430; TAIR:AT5G66430; TAIR:AT5G66430; TAIR:AT5G66430; TAIR:AT5G66430; TAIR:AT5G66430; TAIR:AT5G66430; TAIR:AT5G66430; TAIR:AT5G66430; TAIR:AT5G66430; TAIR:AT5G66430; TAIR:AT5G66430; TAIR:AT5G66430	PF03492.8	Methyltransf_7	Family	N/A	N/A	N/A	Q53L30;; Q2R7T2	NA	NA	NA	LOC_Os11g15040	PWY-4203	volatile benzenoid biosynthesis I (ester formation)	RXN-6723	EC-2.1.1.274	GN7F-32369-MONOMER	LOC_Os06g13510.1	GN7F-32369	LOC_Os06g13510.1
XLOC_011389	XLOC_011389	LOC_Os11g25690	Chr11:14553223-14657291	15.2896	70.9296	2.21383	3.36978	0.00115	0.0872812	no	NA	NA	NA	NA	NA	PF00665.19	rve	Domain	N/A	N/A	N/A	Q53KZ4	NA	NA	NA	LOC_Os11g25690	NA	NA	NA	NA	NA	NA	NA	NA
XLOC_011591	XLOC_011591	LOC_Os11g29710	Chr11:17229937-17231917	0.507418	3.92464	2.95131	2.80484	0.03075	0.49178	no	OsFBO4 - F-box and other domain containing protein, expressed	GO:0005634; GO:0005488; GO:0008150	cellular_component; molecular_function; biological_process	nucleus; binding; biological_process	TAIR:AT1G67340; TAIR:AT1G67340; TAIR:AT1G67340	PF01753.11	zf-MYND	Family	N/A	N/A	N/A	Q2R448	NA	NA	NA	LOC_Os11g29710	NA	NA	NA	NA	NA	NA	NA	NA
XLOC_011601	XLOC_011601	LOC_Os11g29870	Chr11:17352084-17355820	2.08956	13.5616	2.69825	3.21502	0.0089	0.262875	no	WRKY72, expressed	GO:0006950; GO:0006139; GO:0009058; GO:0009991; GO:0005634; GO:0009791; GO:0003700	biological_process; biological_process; biological_process; biological_process; cellular_component; biological_process; molecular_function	response to stress; nucleobase, nucleoside, nucleotide and nucleic acid metabolic process; biosynthetic process; response to extracellular stimulus; nucleus; post-embryonic development; sequence-specific DNA binding transcription factor activity	TAIR:AT5G13080; TAIR:AT5G13080; TAIR:AT5G13080; TAIR:AT5G13080; TAIR:AT5G13080; TAIR:AT5G13080; TAIR:AT5G13080	PF03106.8	WRKY	Domain	IPR003657	DNA-binding WRKY	Molecular Function: transcription factor activity (GO:0003700), Molecular Function: sequence-specific DNA binding (GO:0043565), Biological Process: regulation of transcription (GO:0045449)	Q2R432	4350545;	NP_001067928.1;	osa:4350545;	LOC_Os11g29870	NA	NA	NA	NA	NA	NA	NA	NA
XLOC_011774	XLOC_011774	LOC_Os11g33970	Chr11:19858604-19870900	1.13863	9.80259	3.10587	3.49865	0.0052	0.198042	no	plant protein of unknown function domain containing protein, expressed	GO:0005623; GO:0003674; GO:0008150	cellular_component; molecular_function; biological_process	cell; molecular_function; biological_process	TAIR:AT3G50120; TAIR:AT3G50120; TAIR:AT3G50120	PF03140.8	DUF247	Family	N/A	N/A	N/A	Q2R315	4350669;	NP_001068040.1;	osa:4350669;	LOC_Os11g33970	NA	NA	NA	NA	NA	NA	NA	NA
XLOC_011817	XLOC_011817	LOC_Os11g34920	Chr11:20461109-20464673	0.266789	1.89591	2.82912	2.68936	0.0338	0.51528	no	stripe rust resistance protein Yr10, putative, expressed	GO:0005575; GO:0000166; GO:0006950	cellular_component; molecular_function; biological_process	cellular_component; nucleotide binding; response to stress	TAIR:AT1G58410; TAIR:AT1G58410; TAIR:AT1G58410	PF00931.15	NB-ARC	Domain	IPR000767	Disease resistance protein	Biological Process: defense response (GO:0006952)	Q2R2R4	4350705;	NP_001068075.1;	osa:4350705;	LOC_Os11g34920	NA	NA	NA	NA	NA	NA	NA	NA
XLOC_011880	XLOC_011880	LOC_Os11g36200	Chr11:21297805-21301732	0.885682	8.12299	3.19715	4.09365	0.0022	0.12789	no	receptor-like protein kinase 2 precursor, putative, expressed	GO:0005623; GO:0007165; GO:0016301; GO:0000166; GO:0006464; GO:0005623; GO:0007165; GO:0016301; GO:0000166; GO:0006464	cellular_component; biological_process; molecular_function; molecular_function; biological_process; cellular_component; biological_process; molecular_function; molecular_function; biological_process	cell; signal transduction; kinase activity; nucleotide binding; protein modification process; cell; signal transduction; kinase activity; nucleotide binding; protein modification process	TAIR:AT3G47110; TAIR:AT3G47110; TAIR:AT3G47110; TAIR:AT3G47110; TAIR:AT3G47110; TAIR:AT3G47110; TAIR:AT3G47110; TAIR:AT3G47110; TAIR:AT3G47110; TAIR:AT3G47110	PF00560.26	LRR_1	Repeat	N/A	N/A	N/A	Q2R2D3	4350751;	NP_001068120.1;	osa:4350751;	LOC_Os11g36200	NA	NA	NA	NA	NA	NA	NA	NA
XLOC_011974	XLOC_011974	LOC_Os11g37950	Chr11:22502006-22503109	1.4797	14.26	3.2686	3.41752	0.0157	0.351473	no	WIP3 - Wound-induced protein precursor, expressed	GO:0006950; GO:0009607; GO:0009719; GO:0005623; GO:0030246; GO:0005515; GO:0009628	biological_process; biological_process; biological_process; cellular_component; molecular_function; molecular_function; biological_process	response to stress; response to biotic stimulus; response to endogenous stimulus; cell; carbohydrate binding; protein binding; response to abiotic stimulus	TAIR:AT3G04720; TAIR:AT3G04720; TAIR:AT3G04720; TAIR:AT3G04720; TAIR:AT3G04720; TAIR:AT3G04720; TAIR:AT3G04720	PF00967.10	Barwin	Domain	IPR009009	Barwin-related endoglucanase	N/A	Q2R1V2	4350821;	NP_001068188.1;	osa:4350821;	LOC_Os11g37950	NA	NA	NA	NA	NA	NA	NA	NA
XLOC_012339	XLOC_012339	LOC_Os11g44960,LOC_Os11g44990,LOC_Os11g45050,LOC_Os11g45130,LOC_Os11g45190	Chr11:27221854-27355055	6.60925	60.0863	3.18448	4.09817	0.001	0.0805175	no	NBS-LRR disease resistance protein, putative, expressed	GO:0005515; GO:0006950	molecular_function; biological_process	protein binding; response to stress	TAIR:AT3G14470; TAIR:AT3G14470	PF00931.15	NB-ARC	Domain	N/A	N/A	N/A	Q2QZS9	NA	NA	NA	LOC_Os11g44960	NA	NA	NA	NA	NA	NA	NA	NA
XLOC_012458	XLOC_012458	LOC_Os11g47560	Chr11:28739615-28740710	0.699519	5.45919	2.96425	2.70825	0.03735	0.539988	no	glycosyl hydrolase, putative, expressed	GO:0006950; GO:0008152; GO:0009628; GO:0003824; GO:0005623; GO:0005488; GO:0016787; GO:0009991; GO:0007154	biological_process; biological_process; biological_process; molecular_function; cellular_component; molecular_function; molecular_function; biological_process; biological_process	response to stress; metabolic process; response to abiotic stimulus; catalytic activity; cell; binding; hydrolase activity; response to extracellular stimulus; cell communication	TAIR:AT5G24090; TAIR:AT5G24090; TAIR:AT5G24090; TAIR:AT5G24090; TAIR:AT5G24090; TAIR:AT5G24090; TAIR:AT5G24090; TAIR:AT5G24090; TAIR:AT5G24090	PF00704.21	Glyco_hydro_18	Domain	N/A	N/A	N/A	Q53NL2	4351191;	NP_001068524.1;	osa:4351191;	LOC_Os11g47560	PWY-6902	chitin degradation II	3.2.1.14-RXN	EC-3.2.1.14	GN7F-28496-MONOMER	chitinase	GN7F-28496	LOC_Os07g23850.1
XLOC_012466	XLOC_012466	LOC_Os11g47680	Chr11:28783157-28783992	1.44157	8.55737	2.56953	2.53213	0.03615	0.531499	no	thaumatin family domain containing protein, expressed	GO:0003674; GO:0005618; GO:0005575; GO:0009607	molecular_function; cellular_component; cellular_component; biological_process	molecular_function; cell wall; cellular_component; response to biotic stimulus	TAIR:AT2G28790; TAIR:AT2G28790; TAIR:AT2G28790; TAIR:AT2G28790	PF00314.10	Thaumatin	Domain	N/A	N/A	N/A	Q2QZ50	4351204;	NP_001068536.2;	osa:4351204;	LOC_Os11g47680	NA	NA	NA	NA	NA	NA	NA	NA
XLOC_012824	XLOC_012824	LOC_Os11g07440	Chr11:3739629-3743658	0.309727	5.57836	4.17077	3.52387	0.0124	0.309854	no	plant neutral invertase domain containing protein, expressed	GO:0008152; GO:0005829; GO:0016787; GO:0007275; GO:0008152; GO:0005829; GO:0016787; GO:0007275; GO:0008152; GO:0005829; GO:0016787; GO:0007275; GO:0008152; GO:0005829; GO:0016787; GO:0007275	biological_process; cellular_component; molecular_function; biological_process; biological_process; cellular_component; molecular_function; biological_process; biological_process; cellular_component; molecular_function; biological_process; biological_process; cellular_component; molecular_function; biological_process	metabolic process; cytosol; hydrolase activity; multicellular organismal development; metabolic process; cytosol; hydrolase activity; multicellular organismal development; metabolic process; cytosol; hydrolase activity; multicellular organismal development; metabolic process; cytosol; hydrolase activity; multicellular organismal development	TAIR:AT4G09510; TAIR:AT4G09510; TAIR:AT4G09510; TAIR:AT4G09510; TAIR:AT4G09510; TAIR:AT4G09510; TAIR:AT4G09510; TAIR:AT4G09510; TAIR:AT4G09510; TAIR:AT4G09510; TAIR:AT4G09510; TAIR:AT4G09510; TAIR:AT4G09510; TAIR:AT4G09510; TAIR:AT4G09510; TAIR:AT4G09510	PF04853.5	Invertase_neut	Family	IPR006937	Plant neutral invertase	N/A	H2KW18;; Q53PH5	4349916;	NP_001065878.1;	osa:4349916;	LOC_Os11g07440	NA	NA	NA	NA	NA	NA	NA	NA
XLOC_012849	XLOC_012849	LOC_Os11g07960	Chr11:4128528-4130571	1.35499	8.37722	2.62819	2.97121	0.01195	0.302901	no	transferase family protein, putative, expressed	GO:0016740; GO:0008152; GO:0009058; GO:0009987; GO:0019748; GO:0005829; GO:0008150	molecular_function; biological_process; biological_process; biological_process; biological_process; cellular_component; biological_process	transferase activity; metabolic process; biosynthetic process; cellular process; secondary metabolic process; cytosol; biological_process	TAIR:AT5G48930; TAIR:AT5G48930; TAIR:AT5G48930; TAIR:AT5G48930; TAIR:AT5G48930; TAIR:AT5G48930; TAIR:AT5G48930	PF02458.8	Transferase	Family	IPR003480	Transferase	Molecular Function: transferase activity, transferring acyl groups other than amino-acyl groups (GO:0016747)	Q53MM5;; H2KWF8	4349948;	NP_001065905.1;	osa:4349948;	LOC_Os11g07960	NA	NA	NA	NA	NA	NA	NA	NA
XLOC_012959	XLOC_012959	LOC_Os11g10120	Chr11:5466425-5469365	0.818832	5.74817	2.81146	2.8598	0.01855	0.385686	no	expressed protein	GO:0005515; GO:0006950	molecular_function; biological_process	protein binding; response to stress	TAIR:AT3G14470; TAIR:AT3G14470	PF00931.15	NB-ARC	Domain	IPR002182	NB-ARC	Molecular Function: ATP binding (GO:0005524), Biological Process: apoptosis (GO:0006915)	Q2R934	NA	NA	NA	LOC_Os11g10120	NA	NA	NA	NA	NA	NA	NA	NA
XLOC_013066	XLOC_013066	LOC_Os11g11960	Chr11:6638261-6642424	26.397	107.269	2.0228	2.93299	0.0049	0.193583	no	disease resistance protein RPM1, putative, expressed	GO:0006950; GO:0008219; GO:0005515; GO:0000166; GO:0005886	biological_process; biological_process; molecular_function; molecular_function; cellular_component	response to stress; cell death; protein binding; nucleotide binding; plasma membrane	TAIR:AT3G07040; TAIR:AT3G07040; TAIR:AT3G07040; TAIR:AT3G07040; TAIR:AT3G07040	PF00931.15	NB-ARC	Domain	N/A	N/A	N/A	Q2R8J6	NA	NA	NA	LOC_Os11g11960	NA	NA	NA	NA	NA	NA	NA	NA
XLOC_013291	XLOC_013291	LOC_Os11g17380,LOC_Os11g17390	Chr11:9688099-9702246	10.7376	44.7364	2.05877	3.10636	0.00265	0.141888	no	protein kinase domain containing protein, expressed	GO:0016301; GO:0000166; GO:0006464	molecular_function; molecular_function; biological_process	kinase activity; nucleotide binding; protein modification process	TAIR:AT4G23240; TAIR:AT4G23240; TAIR:AT4G23240	PF00069.18	Pkinase	Domain	N/A	N/A	N/A	Q53QA3	9271600;	NP_001176480.1;	osa:9271600;	LOC_Os11g17380	NA	NA	NA	NA	NA	NA	NA	NA
XLOC_013867	XLOC_013867	LOC_Os11g31190	Chr11:18171677-18174478	0.483805	4.6032	3.25014	2.99013	0.0282	0.473731	no	nodulin MtN3 family protein, putative, expressed	GO:0005623; GO:0016020; GO:0006810; GO:0009987; GO:0005886; GO:0005215; GO:0008150	cellular_component; cellular_component; biological_process; biological_process; cellular_component; molecular_function; biological_process	cell; membrane; transport; cellular process; plasma membrane; transporter activity; biological_process	TAIR:AT5G23660; TAIR:AT5G23660; TAIR:AT5G23660; TAIR:AT5G23660; TAIR:AT5G23660; TAIR:AT5G23660; TAIR:AT5G23660	PF03083.9	MtN3_slv	Family	N/A	N/A	N/A	Q2R3P9	4350572;	NP_001067955.1;	osa:4350572;	LOC_Os11g31190	NA	NA	NA	NA	NA	NA	NA	NA
XLOC_013907	XLOC_013907	LOC_Os11g31900	Chr11:18750970-18753286	15.3093	78.7306	2.36252	3.6055	0.00055	0.0555248	no	acyl carrier protein, putative, expressed	GO:0006810; GO:0009628; GO:0009536; GO:0009058; GO:0009987; GO:0006629; GO:0005215; GO:0006810; GO:0009628; GO:0009536; GO:0009058; GO:0009987; GO:0006629; GO:0005215; GO:0006810; GO:0009628; GO:0009536; GO:0009058; GO:0009987; GO:0006629; GO:0005215	biological_process; biological_process; cellular_component; biological_process; biological_process; biological_process; molecular_function; biological_process; biological_process; cellular_component; biological_process; biological_process; biological_process; molecular_function; biological_process; biological_process; cellular_component; biological_process; biological_process; biological_process;…	transport; response to abiotic stimulus; plastid; biosynthetic process; cellular process; lipid metabolic process; transporter activity; transport; response to abiotic stimulus; plastid; biosynthetic process; cellular process; lipid metabolic process; transporter activity; transport; response to abiotic stimulus; plastid; biosynthetic process; cellular process; lipid metabolic process; transporte…	TAIR:AT4G25050; TAIR:AT4G25050; TAIR:AT4G25050; TAIR:AT4G25050; TAIR:AT4G25050; TAIR:AT4G25050; TAIR:AT4G25050; TAIR:AT4G25050; TAIR:AT4G25050; TAIR:AT4G25050; TAIR:AT4G25050; TAIR:AT4G25050; TAIR:AT4G25050; TAIR:AT4G25050; TAIR:AT4G25050; TAIR:AT4G25050; TAIR:AT4G25050; TAIR:AT4G25050; TAIR:AT4G25050; TAIR:AT4G25050; TAIR:AT4G25050	PF00550.18	PP-binding	Domain	IPR009081	Acyl carrier protein-like	Molecular Function: acyl carrier activity (GO:0000036)	Q2R3H7;; Q2R3H6	4350605;	NP_001067983.1;	osa:4350605;	LOC_Os11g31900	NA	NA	NA	NA	NA	NA	NA	NA
XLOC_013940	XLOC_013940	LOC_Os11g32500	Chr11:19180540-19182360	7.28545	62.0566	3.09049	4.35667	0.0003	0.0400758	yes	rubredoxin family protein, putative, expressed	GO:0003674; GO:0005488	molecular_function; molecular_function	molecular_function; binding	TAIR:AT5G51010; TAIR:AT5G51010	PF00301.13	Rubredoxin	Domain	N/A	N/A	N/A	Q2R3B6	4350631;	NP_001068004.1;	osa:4350631;	LOC_Os11g32500	NA	NA	NA	NA	NA	NA	NA	NA
XLOC_014218	XLOC_014218	LOC_Os11g38870	Chr11:23128488-23137598	1.65433	9.9975	2.59532	3.07431	0.01065	0.289212	no	helix-loop-helix DNA-binding domain containing protein, expressed	GO:0009991; GO:0007154; GO:0006950; GO:0008150; GO:0003677; GO:0005634; GO:0009058; GO:0006139; GO:0003700; GO:0009536; GO:0009991; GO:0007154; GO:0006950; GO:0008150; GO:0003677; GO:0005634; GO:0009058; GO:0006139; GO:0003700; GO:0009536	biological_process; biological_process; biological_process; biological_process; molecular_function; cellular_component; biological_process; biological_process; molecular_function; cellular_component; biological_process; biological_process; biological_process; biological_process; molecular_function; cellular_component; biological_process; biological_process; molecular_function; cellular_component	response to extracellular stimulus; cell communication; response to stress; biological_process; DNA binding; nucleus; biosynthetic process; nucleobase, nucleoside, nucleotide and nucleic acid metabolic process; sequence-specific DNA binding transcription factor activity; plastid; response to extracellular stimulus; cell communication; response to stress; biological_process; DNA binding; nucleus; …	TAIR:AT3G47640; TAIR:AT3G47640; TAIR:AT3G47640; TAIR:AT3G47640; TAIR:AT3G47640; TAIR:AT3G47640; TAIR:AT3G47640; TAIR:AT3G47640; TAIR:AT3G47640; TAIR:AT3G47640; TAIR:AT3G47640; TAIR:AT3G47640; TAIR:AT3G47640; TAIR:AT3G47640; TAIR:AT3G47640; TAIR:AT3G47640; TAIR:AT3G47640; TAIR:AT3G47640; TAIR:AT3G47640; TAIR:AT3G47640	NA	NA	NA	N/A	N/A	N/A	Q2R1K8	4350864;	NP_001068228.1;	osa:4350864;	LOC_Os11g38870	NA	NA	NA	NA	NA	NA	NA	NA
XLOC_014412	XLOC_014412	LOC_Os11g42970	Chr11:25895796-25897234	4.99097	26.2731	2.3962	3.19437	0.00355	0.165604	no	membrane associated DUF588 domain containing protein, putative, expressed	NA	NA	NA	NA	PF04535.5	DUF588	Domain	N/A	N/A	N/A	Q2R0D1	4351034;	NP_001068378.1;	osa:4351034;	LOC_Os11g42970	NA	NA	NA	NA	NA	NA	NA	NA
XLOC_014535	XLOC_014535	LOC_Os11g45740	Chr11:27670320-27673334	4.49998	21.0548	2.22616	3.04544	0.00585	0.209665	no	MYB family transcription factor, putative, expressed	GO:0003677; GO:0009058; GO:0006139; GO:0006950; GO:0009628; GO:0003700; GO:0009719	molecular_function; biological_process; biological_process; biological_process; biological_process; molecular_function; biological_process	DNA binding; biosynthetic process; nucleobase, nucleoside, nucleotide and nucleic acid metabolic process; response to stress; response to abiotic stimulus; sequence-specific DNA binding transcription factor activity; response to endogenous stimulus	TAIR:AT5G49620; TAIR:AT5G49620; TAIR:AT5G49620; TAIR:AT5G49620; TAIR:AT5G49620; TAIR:AT5G49620; TAIR:AT5G49620	PF00249.24	Myb_DNA-binding	Domain	IPR009057	Homeodomain-like	N/A	Q2QZJ8	4351131;	NP_001068466.2;	osa:4351131;	LOC_Os11g45740	NA	NA	NA	NA	NA	NA	NA	NA
XLOC_014601	XLOC_014601	LOC_Os11g47600	Chr11:28758714-28760007	0.724299	10.7584	3.89273	3.84248	0.0137	0.325137	no	glycosyl hydrolase, putative, expressed	GO:0006950; GO:0008152; GO:0009628; GO:0003824; GO:0005623; GO:0005488; GO:0016787; GO:0009991; GO:0007154	biological_process; biological_process; biological_process; molecular_function; cellular_component; molecular_function; molecular_function; biological_process; biological_process	response to stress; metabolic process; response to abiotic stimulus; catalytic activity; cell; binding; hydrolase activity; response to extracellular stimulus; cell communication	TAIR:AT5G24090; TAIR:AT5G24090; TAIR:AT5G24090; TAIR:AT5G24090; TAIR:AT5G24090; TAIR:AT5G24090; TAIR:AT5G24090; TAIR:AT5G24090; TAIR:AT5G24090	PF00704.21	Glyco_hydro_18	Domain	N/A	N/A	N/A	Q53NL9	4351197;	NP_001068530.1;	osa:4351197;	LOC_Os11g47600	PWY-6902	chitin degradation II	3.2.1.14-RXN	EC-3.2.1.14	GN7F-19151-MONOMER	chitinase	GN7F-19151	LOC_Os01g47070.1
XLOC_014732	XLOC_014732	LOC_Os12g03040	Chr12:1139025-1141362	0.805988	9.18814	3.51094	3.64627	0.00905	0.264939	no	no apical meristem protein, putative, expressed	GO:0005575; GO:0009058; GO:0006139; GO:0007275; GO:0003700	cellular_component; biological_process; biological_process; biological_process; molecular_function	cellular_component; biosynthetic process; nucleobase, nucleoside, nucleotide and nucleic acid metabolic process; multicellular organismal development; sequence-specific DNA binding transcription factor activity	TAIR:AT1G52880; TAIR:AT1G52880; TAIR:AT1G52880; TAIR:AT1G52880; TAIR:AT1G52880	PF02365.8	NAM	Family	IPR003441	No apical meristem (NAM) protein	Molecular Function: DNA binding (GO:0003677), Biological Process: regulation of transcription (GO:0045449)	Q2QYD5	NA	NA	NA	LOC_Os12g03040	NA	NA	NA	NA	NA	NA	NA	NA
XLOC_014791	XLOC_014791	LOC_Os12g04360	Chr12:1851323-1852230	2.1991	26.6194	3.59749	3.76501	0.0137	0.325137	no	calmodulin-like protein 1, putative, expressed	GO:0005488; GO:0008150; GO:0005886	molecular_function; biological_process; cellular_component	binding; biological_process; plasma membrane	TAIR:AT3G10190; TAIR:AT3G10190; TAIR:AT3G10190	PF00036.25	efhand	Domain	IPR018249	EF-HAND 2	N/A	Q2QXZ7	NA	NA	NA	LOC_Os12g04360	NA	NA	NA	NA	NA	NA	NA	NA
XLOC_014796	XLOC_014796	LOC_Os12g04440	Chr12:1888933-1894920	2.92112	13.0205	2.15619	3.06758	0.0061	0.21484	no	2-isopropylmalate synthase B, putative, expressed	GO:0009058; GO:0009987; GO:0008152; GO:0016740; GO:0009536; GO:0009058; GO:0009987; GO:0008152; GO:0016740; GO:0009536	biological_process; biological_process; biological_process; molecular_function; cellular_component; biological_process; biological_process; biological_process; molecular_function; cellular_component	biosynthetic process; cellular process; metabolic process; transferase activity; plastid; biosynthetic process; cellular process; metabolic process; transferase activity; plastid	TAIR:AT1G74040; TAIR:AT1G74040; TAIR:AT1G74040; TAIR:AT1G74040; TAIR:AT1G74040; TAIR:AT1G74040; TAIR:AT1G74040; TAIR:AT1G74040; TAIR:AT1G74040; TAIR:AT1G74040	PF08502.3	LeuA_dimer	Domain	N/A	N/A	N/A	Q2QXY9;; H2KWZ8	4351460;	NP_001066116.1;	osa:4351460;	LOC_Os12g04440	NA	NA	NA	NA	NA	NA	NA	NA
XLOC_014927	XLOC_014927	LOC_Os12g07310	Chr12:3602557-3605041	1.37692	33.1676	4.59026	4.94073	0.0057	0.207952	no	citrate-binding protein precursor, putative, expressed	NA	NA	NA	NA	PF08787.4	Alginate_lyase2	Domain	N/A	N/A	N/A	Q2QX37	4351628;	NP_001066274.1;	osa:4351628;	LOC_Os12g07310	NA	NA	NA	NA	NA	NA	NA	NA
XLOC_015001	XLOC_015001	LOC_Os12g08790	Chr12:4522508-4523704	3.16321	16.7831	2.40755	3.06936	0.00695	0.229069	no	TPR domain protein, putative, expressed	NA	NA	NA	NA	NA	NA	NA	N/A	N/A	N/A	Q2QWN1	4351696;	NP_001066336.1;	osa:4351696;	LOC_Os12g08790	NA	NA	NA	NA	NA	NA	NA	NA
XLOC_015390	XLOC_015390	LOC_Os12g16450	Chr12:9412965-9427799	2.95057	19.4842	2.72324	2.46111	0.04605	0.588559	no	NA	NA	NA	NA	NA	PF00075.17	RnaseH	Domain	N/A	N/A	N/A	Q2QUF2	NA	NA	NA	LOC_Os12g16450	NA	NA	NA	NA	NA	NA	NA	NA
XLOC_015720	XLOC_015720	LOC_Os12g24020	Chr12:13657098-13658801	6.51847	65.932	3.33837	4.79068	0.0001	0.0199623	yes	rhodanese-like domain containing protein, putative, expressed	GO:0008152; GO:0016740; GO:0005737; GO:0008150; GO:0008152; GO:0016740; GO:0005737; GO:0008150; GO:0008152; GO:0016740; GO:0005737; GO:0008150	biological_process; molecular_function; cellular_component; biological_process; biological_process; molecular_function; cellular_component; biological_process; biological_process; molecular_function; cellular_component; biological_process	metabolic process; transferase activity; cytoplasm; biological_process; metabolic process; transferase activity; cytoplasm; biological_process; metabolic process; transferase activity; cytoplasm; biological_process	TAIR:AT5G66170; TAIR:AT5G66170; TAIR:AT5G66170; TAIR:AT5G66170; TAIR:AT5G66170; TAIR:AT5G66170; TAIR:AT5G66170; TAIR:AT5G66170; TAIR:AT5G66170; TAIR:AT5G66170; TAIR:AT5G66170; TAIR:AT5G66170	PF00581.13	Rhodanese	Domain	IPR001763	Rhodanese-like	N/A	Q2QSI2;; H2KWR0	NA	NA	NA	LOC_Os12g24020	NA	NA	NA	NA	NA	NA	NA	NA
XLOC_015738	XLOC_015738	LOC_Os12g24320	Chr12:13879142-13881525	0.762762	6.36297	3.0604	3.26589	0.0169	0.368512	no	ATPase 3, putative, expressed	GO:0000003; GO:0000166; GO:0009056; GO:0006139; GO:0005739; GO:0009791; GO:0016787	biological_process; molecular_function; biological_process; biological_process; cellular_component; biological_process; molecular_function	reproduction; nucleotide binding; catabolic process; nucleobase, nucleoside, nucleotide and nucleic acid metabolic process; mitochondrion; post-embryonic development; hydrolase activity	TAIR:AT5G40010; TAIR:AT5G40010; TAIR:AT5G40010; TAIR:AT5G40010; TAIR:AT5G40010; TAIR:AT5G40010; TAIR:AT5G40010	PF00004.22	AAA	Family	N/A	N/A	N/A	Q2QSF2	NA	NA	NA	LOC_Os12g24320	NA	NA	NA	NA	NA	NA	NA	NA
XLOC_015755	XLOC_015755	LOC_Os12g24650	Chr12:14109154-14114508	1.64758	7.09371	2.10619	2.5829	0.0145	0.336721	no	leucine aminopeptidase, chloroplast precursor, putative, expressed	GO:0008150; GO:0019538; GO:0008152; GO:0016787; GO:0005829; GO:0005488; GO:0005773	biological_process; biological_process; biological_process; molecular_function; cellular_component; molecular_function; cellular_component	biological_process; protein metabolic process; metabolic process; hydrolase activity; cytosol; binding; vacuole	TAIR:AT2G24200; TAIR:AT2G24200; TAIR:AT2G24200; TAIR:AT2G24200; TAIR:AT2G24200; TAIR:AT2G24200; TAIR:AT2G24200	PF00883.14	Peptidase_M17	Domain	N/A	N/A	N/A	Q2QSB9	4352123;	NP_001066684.1;	osa:4352123;	LOC_Os12g24650	NA	NA	NA	NA	NA	NA	NA	NA
XLOC_015978	XLOC_015978	LOC_Os12g29330	Chr12:17391341-17392732	3.003	14.9929	2.31981	2.96881	0.0072	0.233525	no	no apical meristem protein, putative, expressed	GO:0005575; GO:0009058; GO:0006139; GO:0007275; GO:0003700	cellular_component; biological_process; biological_process; biological_process; molecular_function	cellular_component; biosynthetic process; nucleobase, nucleoside, nucleotide and nucleic acid metabolic process; multicellular organismal development; sequence-specific DNA binding transcription factor activity	TAIR:AT3G04070; TAIR:AT3G04070; TAIR:AT3G04070; TAIR:AT3G04070; TAIR:AT3G04070	PF02365.8	NAM	Family	IPR003441	No apical meristem (NAM) protein	Molecular Function: DNA binding (GO:0003677), Biological Process: regulation of transcription (GO:0045449)	Q2QQZ6	4352203;	NP_001066757.1;	osa:4352203;	LOC_Os12g29330	NA	NA	NA	NA	NA	NA	NA	NA
XLOC_016021	XLOC_016021	LOC_Os12g30170,LOC_Os12g30180	Chr12:18111025-18120830	0.346381	6.97372	4.3315	4.15174	0.00625	0.216661	no	expressed protein	NA	NA	NA	NA	NA	NA	NA	N/A	N/A	N/A	Q2QQR0	4352235;	NP_001066787.1;	osa:4352235;	LOC_Os12g30170	NA	NA	NA	NA	NA	NA	NA	NA
XLOC_016117	XLOC_016117	LOC_Os12g32390	Chr12:19543819-19544475	1.41468	10.1805	2.84726	2.5881	0.0389	0.550511	no	expressed protein	NA	NA	NA	NA	NA	NA	NA	N/A	N/A	N/A	Q2QQ33	4352309;	NP_001066852.1;	osa:4352309;	LOC_Os12g32390	NA	NA	NA	NA	NA	NA	NA	NA
XLOC_016149	XLOC_016149	LOC_Os12g33130	Chr12:20045552-20049666	23.6752	154.071	2.70214	4.04738	0.0001	0.0199623	yes	expressed protein	NA	NA	NA	NA	NA	NA	NA	NA	NA	NA	Q2QPV8	4352346;	NP_001066888.1;	osa:4352346;	LOC_Os12g33130	NA	NA	NA	NA	NA	NA	NA	NA
XLOC_016271	XLOC_016271	LOC_Os12g35340	Chr12:21480111-21481075	1.01334	5.94915	2.55357	2.39885	0.04855	0.604874	no	OsGrx_C11 - glutaredoxin subgroup III, expressed	GO:0005623; GO:0003824; GO:0003674; GO:0008152; GO:0019725	cellular_component; molecular_function; molecular_function; biological_process; biological_process	cell; catalytic activity; molecular_function; metabolic process; cellular homeostasis	TAIR:AT2G47870; TAIR:AT2G47870; TAIR:AT2G47870; TAIR:AT2G47870; TAIR:AT2G47870	PF00462.17	Glutaredoxin	Domain	IPR011905	Glutaredoxin-like, plant II	N/A	Q2QP86	4352426;	NP_001066943.1;	osa:4352426;	LOC_Os12g35340	THIOREDOX-PWY	thioredoxin pathway	THIOREDOXIN-REDUCT-NADPH-RXN	EC-1.8.1.9	GN7F-31479-MONOMER	thioredoxin-disulfide reductase	GN7F-31479	LOC_Os02g30850.1
XLOC_016347	XLOC_016347	LOC_Os12g36830	Chr12:22580777-22581972	3.30456	32.2039	3.28471	3.9701	0.0024	0.134634	no	pathogenesis-related Bet v I family protein, putative, expressed	NA	NA	NA	NA	PF00407.12	Bet_v_1	Domain	IPR000916	Bet v I allergen	Biological Process: defense response (GO:0006952), Biological Process: response to biotic stimulus (GO:0009607)	Q75T45	4352487;	NP_001066994.1;	osa:4352487;	LOC_Os12g36830	NA	NA	NA	NA	NA	NA	NA	NA
XLOC_016357	XLOC_016357	LOC_Os12g36940	Chr12:22648102-22656270	1.98147	9.3473	2.23798	2.96113	0.0049	0.193583	no	calmodulin binding protein, putative, expressed	GO:0005575; GO:0005515; GO:0008150	cellular_component; molecular_function; biological_process	cellular_component; protein binding; biological_process	TAIR:AT5G57580; TAIR:AT5G57580; TAIR:AT5G57580	PF07887.4	Calmodulin_bind	Family	N/A	N/A	N/A	Q2QNS0	4352498;	NP_001067004.1;	osa:4352498;	LOC_Os12g36940	NA	NA	NA	NA	NA	NA	NA	NA
XLOC_016418	XLOC_016418	LOC_Os12g38150	Chr12:23427678-23428881	1.09984	22.4587	4.35192	4.67531	0.0061	0.21484	no	osmotin, putative, expressed	GO:0003674; GO:0005618; GO:0005575; GO:0009607	molecular_function; cellular_component; cellular_component; biological_process	molecular_function; cell wall; cellular_component; response to biotic stimulus	TAIR:AT2G28790; TAIR:AT2G28790; TAIR:AT2G28790; TAIR:AT2G28790	PF00314.10	Thaumatin	Domain	IPR001938	Thaumatin, pathogenesis-related	N/A	Q2QND8	4352571;	NP_001067073.1;	osa:4352571;	LOC_Os12g38150	NA	NA	NA	NA	NA	NA	NA	NA
XLOC_016419	XLOC_016419	LOC_Os12g38170	Chr12:23435457-23436594	0.83758	5.7517	2.77969	2.63658	0.03865	0.549177	no	osmotin, putative, expressed	GO:0003674; GO:0005618; GO:0005575; GO:0009607	molecular_function; cellular_component; cellular_component; biological_process	molecular_function; cell wall; cellular_component; response to biotic stimulus	TAIR:AT2G28790; TAIR:AT2G28790; TAIR:AT2G28790; TAIR:AT2G28790	PF00314.10	Thaumatin	Domain	IPR001938	Thaumatin, pathogenesis-related	N/A	Q2QND6	4352572;	NP_001067074.1;	osa:4352572;	LOC_Os12g38170	NA	NA	NA	NA	NA	NA	NA	NA
XLOC_016528	XLOC_016528	LOC_Os12g40180	Chr12:24871708-24872333	1.72099	38.119	4.4692	4.47272	0.0114	0.29722	no	expressed protein	NA	NA	NA	NA	NA	NA	NA	N/A	N/A	N/A	Q2QMS6	4352683;	NP_001067174.1;	osa:4352683;	LOC_Os12g40180	NA	NA	NA	NA	NA	NA	NA	NA
XLOC_016609	XLOC_016609	LOC_Os12g41680	Chr12:25800781-25806616	4.63444	31.9698	2.78624	3.9693	0.00055	0.0555248	no	No apical meristem protein, putative, expressed	GO:0000003; GO:0009653; GO:0009791; GO:0009790; GO:0009058; GO:0006139; GO:0007275; GO:0009719; GO:0007165; GO:0003700	biological_process; biological_process; biological_process; biological_process; biological_process; biological_process; biological_process; biological_process; biological_process; molecular_function	reproduction; anatomical structure morphogenesis; post-embryonic development; embryo development; biosynthetic process; nucleobase, nucleoside, nucleotide and nucleic acid metabolic process; multicellular organismal development; response to endogenous stimulus; signal transduction; sequence-specific DNA binding transcription factor activity	TAIR:AT1G56010; TAIR:AT1G56010; TAIR:AT1G56010; TAIR:AT1G56010; TAIR:AT1G56010; TAIR:AT1G56010; TAIR:AT1G56010; TAIR:AT1G56010; TAIR:AT1G56010; TAIR:AT1G56010	PF02365.8	NAM	Family	IPR003441	No apical meristem (NAM) protein	Molecular Function: DNA binding (GO:0003677), Biological Process: regulation of transcription (GO:0045449)	Q2QMB5	4352763;	NP_001067248.1;	osa:4352763;	LOC_Os12g41680	NA	NA	NA	NA	NA	NA	NA	NA
XLOC_016755	XLOC_016755	LOC_Os12g01490	Chr12:296464-299117	1.20961	5.44821	2.17124	2.5057	0.0306	0.49178	no	MYB family transcription factor, putative, expressed	GO:0003677; GO:0009058; GO:0006139; GO:0003700	molecular_function; biological_process; biological_process; molecular_function	DNA binding; biosynthetic process; nucleobase, nucleoside, nucleotide and nucleic acid metabolic process; sequence-specific DNA binding transcription factor activity	TAIR:AT2G40260; TAIR:AT2G40260; TAIR:AT2G40260; TAIR:AT2G40260	PF00249.24	Myb_DNA-binding	Domain	N/A	N/A	N/A	Q2QYV2	4351260;	NP_001065933.1;	osa:4351260;	LOC_Os12g01490	NA	NA	NA	NA	NA	NA	NA	NA
XLOC_016931	XLOC_016931	LOC_Os12g04990	Chr12:2161547-2170254	7.78141	39.8935	2.35805	3.63048	0.00065	0.0608584	no	acyl-CoA synthetase protein, putative, expressed	GO:0016020; GO:0008152; GO:0009987; GO:0006629; GO:0003824; GO:0005777; GO:0008150; GO:0016020; GO:0008152; GO:0009987; GO:0006629; GO:0003824; GO:0005777; GO:0008150; GO:0016020; GO:0008152; GO:0009987; GO:0006629; GO:0003824; GO:0005777; GO:0008150; GO:0016020; GO:0008152; GO:0009987; GO:0006629; GO:0003824; GO:0005777; GO:0008150; GO:0016020; GO:0008152; GO:0009987; GO:0006629; GO:0003824; GO:…	cellular_component; biological_process; biological_process; biological_process; molecular_function; cellular_component; biological_process; cellular_component; biological_process; biological_process; biological_process; molecular_function; cellular_component; biological_process; cellular_component; biological_process; biological_process; biological_process; molecular_function; cellular_component;…	membrane; metabolic process; cellular process; lipid metabolic process; catalytic activity; peroxisome; biological_process; membrane; metabolic process; cellular process; lipid metabolic process; catalytic activity; peroxisome; biological_process; membrane; metabolic process; cellular process; lipid metabolic process; catalytic activity; peroxisome; biological_process; membrane; metabolic process…	TAIR:AT3G05970; TAIR:AT3G05970; TAIR:AT3G05970; TAIR:AT3G05970; TAIR:AT3G05970; TAIR:AT3G05970; TAIR:AT3G05970; TAIR:AT3G05970; TAIR:AT3G05970; TAIR:AT3G05970; TAIR:AT3G05970; TAIR:AT3G05970; TAIR:AT3G05970; TAIR:AT3G05970; TAIR:AT3G05970; TAIR:AT3G05970; TAIR:AT3G05970; TAIR:AT3G05970; TAIR:AT3G05970; TAIR:AT3G05970; TAIR:AT3G05970; TAIR:AT3G05970; TAIR:AT3G05970; TAIR:AT3G05970; TAIR:AT3G05970;…	PF00501.21	AMP-binding	Family	N/A	N/A	N/A	Q2QXT1;; Q2QXT2;; Q2QXT0	4351483;	NP_001066139.1;	osa:4351483;	LOC_Os12g04990	NA	NA	NA	NA	NA	NA	NA	NA
XLOC_017209	XLOC_017209	LOC_Os12g10590	Chr12:5644896-5645645	143.937	906.133	2.65429	3.62837	0.001	0.0805175	no	OsClp13 - Putative Clp protease homologue, expressed	GO:0009536; GO:0016020; GO:0009579; GO:0019538; GO:0016787	cellular_component; cellular_component; cellular_component; biological_process; molecular_function	plastid; membrane; thylakoid; protein metabolic process; hydrolase activity	TAIR:ATCG00670; TAIR:ATCG00670; TAIR:ATCG00670; TAIR:ATCG00670; TAIR:ATCG00670	PF00574.16	CLP_protease	Domain	N/A	N/A	N/A	Q2QW48	NA	NA	NA	LOC_Os12g10590	NA	NA	NA	NA	NA	NA	NA	NA
XLOC_017499	XLOC_017499	LOC_Os12g17160	Chr12:9821542-9823933	0.831535	5.64709	2.76366	2.91306	0.02275	0.426764	no	flavonol sulfotransferase, putative, expressed	GO:0005575; GO:0008152; GO:0016740; GO:0009719	cellular_component; biological_process; molecular_function; biological_process	cellular_component; metabolic process; transferase activity; response to endogenous stimulus	TAIR:AT1G13420; TAIR:AT1G13420; TAIR:AT1G13420; TAIR:AT1G13420	PF00685.20	Sulfotransfer_1	Domain	N/A	N/A	N/A	Q2QU81;; B7EK25	NA	NA	NA	LOC_Os12g17160	NA	NA	NA	NA	NA	NA	NA	NA
XLOC_017601	XLOC_017601	LOC_Os12g19030	Chr12:11045667-11057114	5.21873	21.9904	2.0751	3.16689	0.004	0.177666	no	copine, putative, expressed	GO:0008152; GO:0009987; GO:0009058; GO:0006464; GO:0005886; GO:0003824	biological_process; biological_process; biological_process; biological_process; cellular_component; molecular_function	metabolic process; cellular process; biosynthetic process; protein modification process; plasma membrane; catalytic activity	TAIR:AT5G14420; TAIR:AT5G14420; TAIR:AT5G14420; TAIR:AT5G14420; TAIR:AT5G14420; TAIR:AT5G14420	PF07002.9	Copine	Family	N/A	N/A	N/A	Q2QTN7	4352002;	NP_001066593.1;	osa:4352002;	LOC_Os12g19030	NA	NA	NA	NA	NA	NA	NA	NA
XLOC_017922	XLOC_017922	LOC_Os12g26470	Chr12:15418375-15555676	0.766145	17.2152	4.48992	4.13947	0.0201	0.399676	no	aspartic proteinase nepenthesin-1 precursor, putative, expressed	GO:0005623; GO:0019538; GO:0016787	cellular_component; biological_process; molecular_function	cell; protein metabolic process; hydrolase activity	TAIR:AT2G03200; TAIR:AT2G03200; TAIR:AT2G03200	NA	NA	NA	IPR009007	Peptidase aspartic, catalytic	Molecular Function: aspartic-type endopeptidase activity (GO:0004190), Biological Process: proteolysis (GO:0006508)	Q2QRT5	NA	NA	NA	LOC_Os12g26470	NA	NA	NA	NA	NA	NA	NA	NA
XLOC_018030	XLOC_018030	LOC_Os12g28550	Chr12:16872596-16874580	0.271768	2.2599	3.05581	2.61226	0.04995	0.611515	no	ATPase, AAA family domain containing protein, expressed	GO:0008152; GO:0000166; GO:0016787; GO:0009056; GO:0006139	biological_process; molecular_function; molecular_function; biological_process; biological_process	metabolic process; nucleotide binding; hydrolase activity; catabolic process; nucleobase, nucleoside, nucleotide and nucleic acid metabolic process	TAIR:AT3G28510; TAIR:AT3G28510; TAIR:AT3G28510; TAIR:AT3G28510; TAIR:AT3G28510	PF00004.22	AAA	Family	IPR003959	ATPase, AAA-type, core	Molecular Function: ATP binding (GO:0005524)	Q2QR74	NA	NA	NA	LOC_Os12g28550	NA	NA	NA	NA	NA	NA	NA	NA
XLOC_018211	XLOC_018211	LOC_Os12g32280	Chr12:19487427-19492831	1.29625	12.9561	3.32121	3.02709	0.03055	0.491663	no	SWIB/MDM2 domain containing protein, expressed	GO:0003674; GO:0008150; GO:0009536	molecular_function; biological_process; cellular_component	molecular_function; biological_process; plastid	TAIR:AT4G34290; TAIR:AT4G34290; TAIR:AT4G34290	PF02201.11	SWIB	Domain	IPR019835	SWIB domain	N/A	Q2QQ44	NA	NA	NA	LOC_Os12g32280	NA	NA	NA	NA	NA	NA	NA	NA
XLOC_018402	XLOC_018402	LOC_Os12g36110	Chr12:22126679-22136979	4.0839	25.0945	2.61936	3.91167	0.00025	0.0350796	yes	calmodulin binding protein, putative, expressed	GO:0005575; GO:0005515; GO:0008150	cellular_component; molecular_function; biological_process	cellular_component; protein binding; biological_process	TAIR:AT5G57580; TAIR:AT5G57580; TAIR:AT5G57580	PF07887.4	Calmodulin_bind	Family	N/A	N/A	N/A	Q2QP06	NA	NA	NA	LOC_Os12g36110	NA	NA	NA	NA	NA	NA	NA	NA
XLOC_018517	XLOC_018517	LOC_Os12g38770	Chr12:23819082-23823030	0.685004	4.1332	2.59307	2.55288	0.02225	0.42142	no	nucleotide pyrophosphatase/phosphodiesterase, putative, expressed	GO:0005623; GO:0005488; GO:0008152; GO:0005515; GO:0016787; GO:0009987; GO:0008150	cellular_component; molecular_function; biological_process; molecular_function; molecular_function; biological_process; biological_process	cell; binding; metabolic process; protein binding; hydrolase activity; cellular process; biological_process	TAIR:AT1G13750; TAIR:AT1G13750; TAIR:AT1G13750; TAIR:AT1G13750; TAIR:AT1G13750; TAIR:AT1G13750; TAIR:AT1G13750	PF00149.21	Metallophos	Domain	IPR008963	Purple acid phosphatase-like, N-terminal	Molecular Function: acid phosphatase activity (GO:0003993), Molecular Function: metal ion binding (GO:0046872)	Q2QN72	NA	NA	NA	LOC_Os12g38770	NA	NA	NA	NA	NA	NA	NA	NA
XLOC_018737	XLOC_018737	LOC_Os12g43410	Chr12:26930639-26947691	1.20826	14.9491	3.62906	2.76069	0.03635	0.532364	no	thaumatin, putative, expressed	GO:0005576; GO:0006950; GO:0009607; GO:0009628; GO:0005773; GO:0003674; GO:0008150; GO:0005618; GO:0005515; GO:0009058; GO:0009987; GO:0019748	cellular_component; biological_process; biological_process; biological_process; cellular_component; molecular_function; biological_process; cellular_component; molecular_function; biological_process; biological_process; biological_process	extracellular region; response to stress; response to biotic stimulus; response to abiotic stimulus; vacuole; molecular_function; biological_process; cell wall; protein binding; biosynthetic process; cellular process; secondary metabolic process	TAIR:AT1G75040; TAIR:AT1G75040; TAIR:AT1G75040; TAIR:AT1G75040; TAIR:AT1G75040; TAIR:AT1G75040; TAIR:AT1G75040; TAIR:AT1G75040; TAIR:AT1G75040; TAIR:AT1G75040; TAIR:AT1G75040; TAIR:AT1G75040	PF00314.10	Thaumatin	Domain	IPR001938	Thaumatin, pathogenesis-related	N/A	Q2QLT1	NA	NA	NA	LOC_Os12g43410	NA	NA	NA	NA	NA	NA	NA	NA
XLOC_018738	XLOC_018738	LOC_Os12g43410	Chr12:26930639-26947691	2.3967	14.0677	2.55326	2.21901	0.03615	0.531499	no	thaumatin, putative, expressed	GO:0005576; GO:0006950; GO:0009607; GO:0009628; GO:0005773; GO:0003674; GO:0008150; GO:0005618; GO:0005515; GO:0009058; GO:0009987; GO:0019748	cellular_component; biological_process; biological_process; biological_process; cellular_component; molecular_function; biological_process; cellular_component; molecular_function; biological_process; biological_process; biological_process	extracellular region; response to stress; response to biotic stimulus; response to abiotic stimulus; vacuole; molecular_function; biological_process; cell wall; protein binding; biosynthetic process; cellular process; secondary metabolic process	TAIR:AT1G75040; TAIR:AT1G75040; TAIR:AT1G75040; TAIR:AT1G75040; TAIR:AT1G75040; TAIR:AT1G75040; TAIR:AT1G75040; TAIR:AT1G75040; TAIR:AT1G75040; TAIR:AT1G75040; TAIR:AT1G75040; TAIR:AT1G75040	PF00314.10	Thaumatin	Domain	IPR001938	Thaumatin, pathogenesis-related	N/A	Q2QLT1	NA	NA	NA	LOC_Os12g43410	NA	NA	NA	NA	NA	NA	NA	NA
XLOC_018771	XLOC_018771	LOC_Os12g44030,LOC_Os12g44050	Chr12:27309870-27317290	0.283091	4.89542	4.1121	2.81093	0.04515	0.586697	no	purple acid phosphatase precursor, putative, expressed	GO:0005618; GO:0005575; GO:0005829; GO:0016787; GO:0008152; GO:0009987; GO:0008150	cellular_component; cellular_component; cellular_component; molecular_function; biological_process; biological_process; biological_process	cell wall; cellular_component; cytosol; hydrolase activity; metabolic process; cellular process; biological_process	TAIR:AT2G16430; TAIR:AT2G16430; TAIR:AT2G16430; TAIR:AT2G16430; TAIR:AT2G16430; TAIR:AT2G16430; TAIR:AT2G16430	PF00149.21	Metallophos	Domain	N/A	N/A	N/A	Q2QLL8	NA	NA	NA	LOC_Os12g44030	PWY-6348	phosphate acquisition	ACID-PHOSPHATASE-RXN	EC-3.1.3.2	GN7F-21419-MONOMER	acid phosphatase	GN7F-21419	LOC_Os12g44030.1
XLOC_018810	XLOC_018810	LOC_Os02g01510	Chr2:295301-299174	1.01783	12.5582	3.62506	3.92392	0.0077	0.242445	no	lactate/malate dehydrogenase, putative, expressed	GO:0003824; GO:0008152; GO:0005488; GO:0009719; GO:0005829; GO:0006950; GO:0009628; GO:0005886	molecular_function; biological_process; molecular_function; biological_process; cellular_component; biological_process; biological_process; cellular_component	catalytic activity; metabolic process; binding; response to endogenous stimulus; cytosol; response to stress; response to abiotic stimulus; plasma membrane	TAIR:AT4G17260; TAIR:AT4G17260; TAIR:AT4G17260; TAIR:AT4G17260; TAIR:AT4G17260; TAIR:AT4G17260; TAIR:AT4G17260; TAIR:AT4G17260	PF02866.11	Ldh_1_C	Domain	N/A	N/A	N/A	NA	NA	NA	NA	LOC_Os02g01510	NA	NA	NA	NA	NA	NA	NA	NA
XLOC_019020	XLOC_019020	LOC_Os02g05470	Chr2:2638416-2642111	4.43774	19.6215	2.14454	2.9967	0.0053	0.200694	no	CCT motif family protein, expressed	GO:0003674; GO:0008150; GO:0009536; GO:0003674; GO:0008150; GO:0009536	molecular_function; biological_process; cellular_component; molecular_function; biological_process; cellular_component	molecular_function; biological_process; plastid; molecular_function; biological_process; plastid	TAIR:AT4G25990; TAIR:AT4G25990; TAIR:AT4G25990; TAIR:AT4G25990; TAIR:AT4G25990; TAIR:AT4G25990	PF06203.7	CCT	Motif	N/A	N/A	N/A	NA	NA	NA	NA	LOC_Os02g05470	NA	NA	NA	NA	NA	NA	NA	NA
XLOC_019167	XLOC_019167	LOC_Os02g08100	Chr2:4280498-4285931	7.09167	60.9889	3.10435	4.66917	5e-05	0.0117035	yes	AMP-binding domain containing protein, expressed	GO:0006950; GO:0005575; GO:0003824; GO:0009607; GO:0008152; GO:0009628; GO:0009987; GO:0019748	biological_process; cellular_component; molecular_function; biological_process; biological_process; biological_process; biological_process; biological_process	response to stress; cellular_component; catalytic activity; response to biotic stimulus; metabolic process; response to abiotic stimulus; cellular process; secondary metabolic process	TAIR:AT1G51680; TAIR:AT1G51680; TAIR:AT1G51680; TAIR:AT1G51680; TAIR:AT1G51680; TAIR:AT1G51680; TAIR:AT1G51680; TAIR:AT1G51680	PF00501.21	AMP-binding	Family	N/A	N/A	N/A	Q6ETN3	4328485;	NP_001046069.1;	osa:4328485;	LOC_Os02g08100	NA	NA	NA	NA	NA	NA	NA	NA
XLOC_019335	XLOC_019335	LOC_Os02g12654	Chr2:6608060-6614735	1.70116	7.04676	2.05044	2.13885	0.01375	0.325593	no	expressed protein	NA	NA	NA	NA	NA	NA	NA	N/A	N/A	N/A	NA	NA	NA	NA	LOC_Os02g12654	NA	NA	NA	NA	NA	NA	NA	NA
XLOC_019511	XLOC_019511	LOC_Os02g16060,LOC_Os02g16080,LOC_Os02g16270	Chr2:9136670-9262614	0.629757	6.59894	3.38937	2.85658	0.02685	0.463717	no	RGA-1, putative, expressed	GO:0005515; GO:0006950	molecular_function; biological_process	protein binding; response to stress	TAIR:AT3G14470; TAIR:AT3G14470	PF00931.15	NB-ARC	Domain	N/A	N/A	N/A	NA	NA	NA	NA	LOC_Os02g16060	NA	NA	NA	NA	NA	NA	NA	NA
XLOC_019618	XLOC_019618	LOC_Os02g18070	Chr2:10489373-10498120	3.43699	19.271	2.48721	3.49785	0.00065	0.0608584	no	NB-ARC domain containing protein, expressed	GO:0005515; GO:0006950	molecular_function; biological_process	protein binding; response to stress	TAIR:AT3G14470; TAIR:AT3G14470	PF00931.15	NB-ARC	Domain	N/A	N/A	N/A	NA	NA	NA	NA	LOC_Os02g18070	NA	NA	NA	NA	NA	NA	NA	NA
XLOC_019620	XLOC_019620	LOC_Os02g18080	Chr2:10501641-10508541	1.17624	8.75455	2.89586	3.91467	0.0007	0.0632991	no	NB-ARC domain containing protein, expressed	GO:0005515; GO:0006950	molecular_function; biological_process	protein binding; response to stress	TAIR:AT3G14470; TAIR:AT3G14470	PF00931.15	NB-ARC	Domain	IPR002182	NB-ARC	Molecular Function: ATP binding (GO:0005524), Biological Process: apoptosis (GO:0006915)	NA	NA	NA	NA	LOC_Os02g18080	NA	NA	NA	NA	NA	NA	NA	NA
XLOC_020264	XLOC_020264	LOC_Os02g32370	Chr2:19121902-19125842	0.608902	3.22833	2.40651	2.35212	0.0426	0.572636	no	inositol hexaphosphate kinase, putative, expressed	GO:0009058; GO:0008152; GO:0009987; GO:0005634; GO:0016301; GO:0006139	biological_process; biological_process; biological_process; cellular_component; molecular_function; biological_process	biosynthetic process; metabolic process; cellular process; nucleus; kinase activity; nucleobase, nucleoside, nucleotide and nucleic acid metabolic process	TAIR:AT5G61760; TAIR:AT5G61760; TAIR:AT5G61760; TAIR:AT5G61760; TAIR:AT5G61760; TAIR:AT5G61760	PF03770.9	IPK	Family	IPR005522	Inositol polyphosphate kinase	Molecular Function: inositol trisphosphate 3-kinase activity (GO:0008440)	Q6H545	4329509;	NP_001046986.1;	osa:4329509;	LOC_Os02g32370	PWY-6554	1D-<i>myo</i>-inositol hexakisphosphate biosynthesis V (from Ins(1,3,4)P3)	RXN-7184	EC-2.7.1.151	GN7F-22472-MONOMER	inositol-polyphosphate multikinase	GN7F-22472	LOC_Os02g32370.1
XLOC_020274	XLOC_020274	LOC_Os02g32520	Chr2:19251344-19256303	20.4284	135.221	2.72667	3.89377	0.0007	0.0632991	no	ERD1 protein, chloroplast precursor, putative, expressed	GO:0008152; GO:0000166; GO:0016043; GO:0005515; GO:0009056; GO:0006139; GO:0009536; GO:0016787; GO:0008152; GO:0000166; GO:0016043; GO:0005515; GO:0009056; GO:0006139; GO:0009536; GO:0016787	biological_process; molecular_function; biological_process; molecular_function; biological_process; biological_process; cellular_component; molecular_function; biological_process; molecular_function; biological_process; molecular_function; biological_process; biological_process; cellular_component; molecular_function	metabolic process; nucleotide binding; cellular component organization; protein binding; catabolic process; nucleobase, nucleoside, nucleotide and nucleic acid metabolic process; plastid; hydrolase activity; metabolic process; nucleotide binding; cellular component organization; protein binding; catabolic process; nucleobase, nucleoside, nucleotide and nucleic acid metabolic process; plastid; hyd…	TAIR:AT5G51070; TAIR:AT5G51070; TAIR:AT5G51070; TAIR:AT5G51070; TAIR:AT5G51070; TAIR:AT5G51070; TAIR:AT5G51070; TAIR:AT5G51070; TAIR:AT5G51070; TAIR:AT5G51070; TAIR:AT5G51070; TAIR:AT5G51070; TAIR:AT5G51070; TAIR:AT5G51070; TAIR:AT5G51070; TAIR:AT5G51070	PF10431.2	ClpB_D2-small	Domain	IPR018368	Chaperonin ClpA/B, conserved site	Molecular Function: ATP binding (GO:0005524)	Q6H795	4329520;	NP_001046997.1;	osa:4329520;	LOC_Os02g32520	NA	NA	NA	NA	NA	NA	NA	NA
XLOC_020296	XLOC_020296	LOC_Os02g33060	Chr2:19644998-19646089	1.54299	10.3965	2.7523	2.60445	0.03395	0.516227	no	expressed protein	NA	NA	NA	NA	NA	NA	NA	N/A	N/A	N/A	NA	NA	NA	NA	LOC_Os02g33060	NA	NA	NA	NA	NA	NA	NA	NA
XLOC_020356	XLOC_020356	LOC_Os02g34380	Chr2:20569235-20575557	0.210458	1.57384	2.90269	2.52027	0.02195	0.420296	no	NA	NA	NA	NA	NA	NA	NA	NA	N/A	N/A	N/A	NA	NA	NA	NA	LOC_Os02g34380	NA	NA	NA	NA	NA	NA	NA	NA
XLOC_020403	XLOC_020403	LOC_Os02g35320	Chr2:21243198-21246761	0.385455	5.29124	3.77897	3.21231	0.0352	0.525418	no	expressed protein	GO:0005783; GO:0003824; GO:0008152; GO:0009607	cellular_component; molecular_function; biological_process; biological_process	endoplasmic reticulum; catalytic activity; metabolic process; response to biotic stimulus	TAIR:AT4G15760; TAIR:AT4G15760; TAIR:AT4G15760; TAIR:AT4G15760	PF01494.12	FAD_binding_3	Family	IPR002938	Monooxygenase, FAD-binding	Molecular Function: monooxygenase activity (GO:0004497), Biological Process: oxidation reduction (GO:0055114)	NA	NA	NA	NA	LOC_Os02g35320	NA	NA	NA	NA	NA	NA	NA	NA
XLOC_020435	XLOC_020435	LOC_Os02g36140	Chr2:21765002-21815709	12.4316	63.4616	2.35187	3.19244	0.0017	0.10848	no	terpene synthase, putative, expressed	GO:0003824; GO:0009536; GO:0009719; GO:0007165; GO:0009058; GO:0009987; GO:0006629; GO:0003824; GO:0009536; GO:0009719; GO:0007165; GO:0009058; GO:0009987; GO:0006629; GO:0003824; GO:0009536; GO:0009719; GO:0007165; GO:0009058; GO:0009987; GO:0006629; GO:0003824; GO:0009536; GO:0009719; GO:0007165; GO:0009058; GO:0009987; GO:0006629	molecular_function; cellular_component; biological_process; biological_process; biological_process; biological_process; biological_process; molecular_function; cellular_component; biological_process; biological_process; biological_process; biological_process; biological_process; molecular_function; cellular_component; biological_process; biological_process; biological_process; biological_process;…	catalytic activity; plastid; response to endogenous stimulus; signal transduction; biosynthetic process; cellular process; lipid metabolic process; catalytic activity; plastid; response to endogenous stimulus; signal transduction; biosynthetic process; cellular process; lipid metabolic process; catalytic activity; plastid; response to endogenous stimulus; signal transduction; biosynthetic process…	TAIR:AT1G79460; TAIR:AT1G79460; TAIR:AT1G79460; TAIR:AT1G79460; TAIR:AT1G79460; TAIR:AT1G79460; TAIR:AT1G79460; TAIR:AT1G79460; TAIR:AT1G79460; TAIR:AT1G79460; TAIR:AT1G79460; TAIR:AT1G79460; TAIR:AT1G79460; TAIR:AT1G79460; TAIR:AT1G79460; TAIR:AT1G79460; TAIR:AT1G79460; TAIR:AT1G79460; TAIR:AT1G79460; TAIR:AT1G79460; TAIR:AT1G79460; TAIR:AT1G79460; TAIR:AT1G79460; TAIR:AT1G79460; TAIR:AT1G79460;…	PF01397.14	Terpene_synth	Domain	IPR008930	Terpenoid cylases/protein prenyltransferase alpha-alpha toroid	N/A	Q0E088	4329724;	NP_001047186.1;	osa:4329724;	LOC_Os02g36140	NA	NA	NA	NA	NA	NA	NA	NA
XLOC_020446	XLOC_020446	LOC_Os02g36440,LOC_Os02g36450	Chr2:22007472-22017647	0.967812	4.66686	2.26965	2.42549	0.0165	0.363687	no	transporter family protein, putative, expressed	GO:0016020; GO:0006810; GO:0009987; GO:0005215; GO:0009607	cellular_component; biological_process; biological_process; molecular_function; biological_process	membrane; transport; cellular process; transporter activity; response to biotic stimulus	TAIR:AT4G21480; TAIR:AT4G21480; TAIR:AT4G21480; TAIR:AT4G21480; TAIR:AT4G21480	PF00083.17	Sugar_tr	Family	N/A	N/A	N/A	NA	NA	NA	NA	LOC_Os02g36440	NA	NA	NA	NA	NA	NA	NA	NA
XLOC_020457	XLOC_020457	LOC_Os02g36619	Chr2:22110006-22117660	0.931918	4.40428	2.24063	2.61082	0.02115	0.411034	no	exo70 exocyst complex subunit, putative, expressed	GO:0005737; GO:0005829; GO:0006810; GO:0009987; GO:0005886	cellular_component; cellular_component; biological_process; biological_process; cellular_component	cytoplasm; cytosol; transport; cellular process; plasma membrane	TAIR:AT5G50380; TAIR:AT5G50380; TAIR:AT5G50380; TAIR:AT5G50380; TAIR:AT5G50380	PF03081.8	Exo70	Family	N/A	N/A	N/A	NA	NA	NA	NA	LOC_Os02g36619	NA	NA	NA	NA	NA	NA	NA	NA
XLOC_020508	XLOC_020508	LOC_Os02g37834	Chr2:22835755-22840276	2.26633	10.5827	2.22328	2.51249	0.01765	0.377399	no	expressed protein	NA	NA	NA	NA	NA	NA	NA	N/A	N/A	N/A	NA	NA	NA	NA	LOC_Os02g37834	NA	NA	NA	NA	NA	NA	NA	NA
XLOC_020518	XLOC_020518	LOC_Os02g38040	Chr2:22978829-22981618	0.396534	4.80381	3.59866	3.2929	0.01965	0.396599	no	leucine-rich repeat family protein, putative, expressed	GO:0007275	biological_process	multicellular organismal development	TAIR:AT3G11330	PF00560.26	LRR_1	Repeat	IPR003591	Leucine-rich repeat, typical subtype	N/A	Q6ZH85	4329845;	NP_001047301.1;	osa:4329845;	LOC_Os02g38040	NA	NA	NA	NA	NA	NA	NA	NA
XLOC_020563	XLOC_020563	LOC_Os02g38840	Chr2:23480214-23486812	3.72349	19.6716	2.40139	3.47629	0.0015	0.102124	no	glucose-6-phosphate 1-dehydrogenase, cytoplasmic isoform, putative, expressed	GO:0005975; GO:0009987; GO:0005829; GO:0008152; GO:0006139; GO:0009056; GO:0003824; GO:0005975; GO:0009987; GO:0005829; GO:0008152; GO:0006139; GO:0009056; GO:0003824	biological_process; biological_process; cellular_component; biological_process; biological_process; biological_process; molecular_function; biological_process; biological_process; cellular_component; biological_process; biological_process; biological_process; molecular_function	carbohydrate metabolic process; cellular process; cytosol; metabolic process; nucleobase, nucleoside, nucleotide and nucleic acid metabolic process; catabolic process; catalytic activity; carbohydrate metabolic process; cellular process; cytosol; metabolic process; nucleobase, nucleoside, nucleotide and nucleic acid metabolic process; catabolic process; catalytic activity	TAIR:AT5G40760; TAIR:AT5G40760; TAIR:AT5G40760; TAIR:AT5G40760; TAIR:AT5G40760; TAIR:AT5G40760; TAIR:AT5G40760; TAIR:AT5G40760; TAIR:AT5G40760; TAIR:AT5G40760; TAIR:AT5G40760; TAIR:AT5G40760; TAIR:AT5G40760; TAIR:AT5G40760	PF00479.15	G6PD_N	Domain	IPR001282	Glucose-6-phosphate dehydrogenase	Molecular Function: glucose-6-phosphate dehydrogenase activity (GO:0004345), Biological Process: glucose metabolic process (GO:0006006), Biological Process: oxidation reduction (GO:0055114)	NA	NA	NA	NA	LOC_Os02g38840	NA	NA	NA	NA	NA	NA	NA	NA
XLOC_020613	XLOC_020613	LOC_Os02g39850	Chr2:24080703-24084963	3.7173	31.0093	3.06037	4.34175	0.0001	0.0199623	yes	transferase family protein, putative, expressed	GO:0016740; GO:0008152; GO:0009058; GO:0009987; GO:0019748; GO:0005829; GO:0008150	molecular_function; biological_process; biological_process; biological_process; biological_process; cellular_component; biological_process	transferase activity; metabolic process; biosynthetic process; cellular process; secondary metabolic process; cytosol; biological_process	TAIR:AT5G48930; TAIR:AT5G48930; TAIR:AT5G48930; TAIR:AT5G48930; TAIR:AT5G48930; TAIR:AT5G48930; TAIR:AT5G48930	PF02458.8	Transferase	Family	N/A	N/A	N/A	NA	NA	NA	NA	LOC_Os02g39850	NA	NA	NA	NA	NA	NA	NA	NA
XLOC_020647	XLOC_020647	LOC_Os02g40500	Chr2:24566318-24568216	10.3884	67.7006	2.7042	3.70417	0.0009	0.0758121	no	OsGrx_C2.1 - glutaredoxin subgroup I, expressed	GO:0003824; GO:0003674; GO:0008152; GO:0019725; GO:0005773; GO:0005829; GO:0005886	molecular_function; molecular_function; biological_process; biological_process; cellular_component; cellular_component; cellular_component	catalytic activity; molecular_function; metabolic process; cellular homeostasis; vacuole; cytosol; plasma membrane	TAIR:AT5G40370; TAIR:AT5G40370; TAIR:AT5G40370; TAIR:AT5G40370; TAIR:AT5G40370; TAIR:AT5G40370; TAIR:AT5G40370	PF00462.17	Glutaredoxin	Domain	IPR014025	Glutaredoxin subgroup	N/A	Q6K953	4329999;	NP_001047447.2;	osa:4329999;	LOC_Os02g40500	NA	NA	NA	NA	NA	NA	NA	NA
XLOC_020758	XLOC_020758	LOC_Os02g43330	Chr2:26143308-26144731	1.39653	19.6091	3.8116	4.36701	0.00275	0.144464	no	homeobox associated leucine zipper, putative, expressed	GO:0005634; GO:0009719; GO:0007165; GO:0006950; GO:0009628; GO:0009058; GO:0006139; GO:0003700	cellular_component; biological_process; biological_process; biological_process; biological_process; biological_process; biological_process; molecular_function	nucleus; response to endogenous stimulus; signal transduction; response to stress; response to abiotic stimulus; biosynthetic process; nucleobase, nucleoside, nucleotide and nucleic acid metabolic process; sequence-specific DNA binding transcription factor activity	TAIR:AT2G46680; TAIR:AT2G46680; TAIR:AT2G46680; TAIR:AT2G46680; TAIR:AT2G46680; TAIR:AT2G46680; TAIR:AT2G46680; TAIR:AT2G46680	PF02183.11	HALZ	Family	N/A	N/A	N/A	Q6H6S3	4330155;	NP_001047582.1;	osa:4330155;	LOC_Os02g43330	NA	NA	NA	NA	NA	NA	NA	NA
XLOC_020807	XLOC_020807	LOC_Os02g44300	Chr2:26799638-26802319	0.371181	2.74454	2.88637	2.23837	0.0345	0.520254	no	MSP domain containing protein, expressed	GO:0005198; GO:0008150; GO:0005198; GO:0008150	molecular_function; biological_process; molecular_function; biological_process	structural molecule activity; biological_process; structural molecule activity; biological_process	TAIR:AT4G00170; TAIR:AT4G00170; TAIR:AT4G00170; TAIR:AT4G00170	PF00635.19	Motile_Sperm	Domain	IPR008962	PapD-like	N/A	NA	NA	NA	NA	LOC_Os02g44300	NA	NA	NA	NA	NA	NA	NA	NA
XLOC_020834	XLOC_020834	LOC_Os02g44880	Chr2:27182921-27186705	0.328816	4.17079	3.66497	3.2082	0.03985	0.557247	no	expressed protein	GO:0003674; GO:0009536	molecular_function; cellular_component	molecular_function; plastid	TAIR:AT1G76240; TAIR:AT1G76240	PF03087.7	DUF241	Family	IPR004320	Protein of unknown function DUF241, plant	N/A	NA	NA	NA	NA	LOC_Os02g44880	NA	NA	NA	NA	NA	NA	NA	NA
XLOC_020838	XLOC_020838	LOC_Os02g44980	Chr2:27244827-27246981	16.6718	113.38	2.76568	4.20905	5e-05	0.0117035	yes	transmembrane amino acid transporter protein, putative, expressed	GO:0016020; GO:0006810; GO:0009987; GO:0005215	cellular_component; biological_process; biological_process; molecular_function	membrane; transport; cellular process; transporter activity	TAIR:AT2G42005; TAIR:AT2G42005; TAIR:AT2G42005; TAIR:AT2G42005	PF01490.11	Aa_trans	Family	N/A	N/A	N/A	NA	NA	NA	NA	LOC_Os02g44980	NA	NA	NA	NA	NA	NA	NA	NA
XLOC_020839	XLOC_020839	LOC_Os02g44990	Chr2:27248696-27251470	0.63424	9.05502	3.83562	4.40204	0.00275	0.144464	no	OsFBDUF13 - F-box and DUF domain containing protein, expressed	GO:0003674; GO:0005575; GO:0008150	molecular_function; cellular_component; biological_process	molecular_function; cellular_component; biological_process	TAIR:AT2G17030; TAIR:AT2G17030; TAIR:AT2G17030	PF03478.11	DUF295	Family	IPR005174	Protein of unknown function DUF295	N/A	NA	NA	NA	NA	LOC_Os02g44990	NA	NA	NA	NA	NA	NA	NA	NA
XLOC_021195	XLOC_021195	LOC_Os02g51890	Chr2:31781307-31789031	0.299311	3.31847	3.4708	3.0567	0.0099	0.278421	no	RNA recognition motif containing protein, putative, expressed	GO:0005575; GO:0003723; GO:0000166; GO:0008150; GO:0003676; GO:0005575; GO:0003723; GO:0000166; GO:0008150; GO:0003676	cellular_component; molecular_function; molecular_function; biological_process; molecular_function; cellular_component; molecular_function; molecular_function; biological_process; molecular_function	cellular_component; RNA binding; nucleotide binding; biological_process; nucleic acid binding; cellular_component; RNA binding; nucleotide binding; biological_process; nucleic acid binding	TAIR:AT1G78260; TAIR:AT1G78260; TAIR:AT1G78260; TAIR:AT1G78260; TAIR:AT1G78260; TAIR:AT1G78260; TAIR:AT1G78260; TAIR:AT1G78260; TAIR:AT1G78260; TAIR:AT1G78260	PF00076.15	RRM_1	Domain	N/A	N/A	N/A	NA	NA	NA	NA	LOC_Os02g51890	NA	NA	NA	NA	NA	NA	NA	NA
XLOC_021210	XLOC_021210	LOC_Os02g52210	Chr2:31967765-31970697	3.97098	16.1149	2.02082	2.90112	0.0057	0.207952	no	zinc finger, C3HC4 type domain containing protein, expressed	GO:0009991; GO:0007154; GO:0016020; GO:0008150; GO:0006464; GO:0005488; GO:0009719; GO:0003824; GO:0009991; GO:0007154; GO:0016020; GO:0008150; GO:0006464; GO:0005488; GO:0009719; GO:0003824	biological_process; biological_process; cellular_component; biological_process; biological_process; molecular_function; biological_process; molecular_function; biological_process; biological_process; cellular_component; biological_process; biological_process; molecular_function; biological_process; molecular_function	response to extracellular stimulus; cell communication; membrane; biological_process; protein modification process; binding; response to endogenous stimulus; catalytic activity; response to extracellular stimulus; cell communication; membrane; biological_process; protein modification process; binding; response to endogenous stimulus; catalytic activity	TAIR:AT5G27420; TAIR:AT5G27420; TAIR:AT5G27420; TAIR:AT5G27420; TAIR:AT5G27420; TAIR:AT5G27420; TAIR:AT5G27420; TAIR:AT5G27420; TAIR:AT5G27420; TAIR:AT5G27420; TAIR:AT5G27420; TAIR:AT5G27420; TAIR:AT5G27420; TAIR:AT5G27420; TAIR:AT5G27420; TAIR:AT5G27420	PF00097.18	zf-C3HC4	Domain	IPR001841	Zinc finger, RING-type	Molecular Function: protein binding (GO:0005515), Molecular Function: zinc ion binding (GO:0008270)	NA	NA	NA	NA	LOC_Os02g52210	NA	NA	NA	NA	NA	NA	NA	NA
XLOC_021337	XLOC_021337	LOC_Os02g54980	Chr2:33688349-33690488	9.61018	59.513	2.63057	4.09666	0.00015	0.0255145	yes	pheophorbide a oxygenase, chloroplast precursor, putative, expressed	GO:0005488; GO:0003824; GO:0009536; GO:0006810; GO:0009987; GO:0008152	molecular_function; molecular_function; cellular_component; biological_process; biological_process; biological_process	binding; catalytic activity; plastid; transport; cellular process; metabolic process	TAIR:AT2G24820; TAIR:AT2G24820; TAIR:AT2G24820; TAIR:AT2G24820; TAIR:AT2G24820; TAIR:AT2G24820	PF08417.5	PaO	Family	IPR017941	Rieske [2Fe-2S] iron-sulphur domain	Molecular Function: oxidoreductase activity (GO:0016491), Molecular Function: 2 iron, 2 sulfur cluster binding (GO:0051537), Biological Process: oxidation reduction (GO:0055114)	NA	NA	NA	NA	LOC_Os02g54980	PWY-5098	chlorophyll <i>a</i> degradation I	RXN-7740	EC-1.14.12.20	GN7F-21978-MONOMER		GN7F-21978	LOC_Os02g54980.1
XLOC_021399	XLOC_021399	LOC_Os02g56300	Chr2:34463029-34467277	1.85804	8.083	2.12111	2.67136	0.0148	0.340548	no	aminotransferase, classes I and II, domain containing protein, expressed	GO:0005783; GO:0008152; GO:0005515; GO:0016740; GO:0009058; GO:0009987; GO:0006629; GO:0016049	cellular_component; biological_process; molecular_function; molecular_function; biological_process; biological_process; biological_process; biological_process	endoplasmic reticulum; metabolic process; protein binding; transferase activity; biosynthetic process; cellular process; lipid metabolic process; cell growth	TAIR:AT4G36480; TAIR:AT4G36480; TAIR:AT4G36480; TAIR:AT4G36480; TAIR:AT4G36480; TAIR:AT4G36480; TAIR:AT4G36480; TAIR:AT4G36480	PF00155.14	Aminotran_1_2	Domain	IPR015421	Pyridoxal phosphate-dependent transferase, major region, subdomain 1	Molecular Function: catalytic activity (GO:0003824), Molecular Function: pyridoxal phosphate binding (GO:0030170)	Q6K8E7	4331075;	NP_001048451.2;	osa:4331075;	LOC_Os02g56300	NA	NA	NA	NA	NA	NA	NA	NA
XLOC_021600	XLOC_021600	LOC_Os02g02400	Chr2:824849-827644	18.315	159.367	3.12125	4.57064	5e-05	0.0117035	yes	catalase isozyme A, putative, expressed	GO:0009991; GO:0007154; GO:0006950; GO:0009628; GO:0005777; GO:0008152; GO:0005488; GO:0009719; GO:0008150; GO:0005618; GO:0003824; GO:0005739; GO:0009536; GO:0005840; GO:0005829; GO:0009991; GO:0007154; GO:0006950; GO:0009628; GO:0005777; GO:0008152; GO:0005488; GO:0009719; GO:0008150; GO:0005618; GO:0003824; GO:0005739; GO:0009536; GO:0005840; GO:0005829; GO:0009628; GO:0005777; GO:0008152; GO:…	biological_process; biological_process; biological_process; biological_process; cellular_component; biological_process; molecular_function; biological_process; biological_process; cellular_component; molecular_function; cellular_component; cellular_component; cellular_component; cellular_component; biological_process; biological_process; biological_process; biological_process; cellular_component;…	response to extracellular stimulus; cell communication; response to stress; response to abiotic stimulus; peroxisome; metabolic process; binding; response to endogenous stimulus; biological_process; cell wall; catalytic activity; mitochondrion; plastid; ribosome; cytosol; response to extracellular stimulus; cell communication; response to stress; response to abiotic stimulus; peroxisome; metaboli…	TAIR:AT1G20630; TAIR:AT1G20630; TAIR:AT1G20630; TAIR:AT1G20630; TAIR:AT1G20630; TAIR:AT1G20630; TAIR:AT1G20630; TAIR:AT1G20630; TAIR:AT1G20630; TAIR:AT1G20630; TAIR:AT1G20630; TAIR:AT1G20630; TAIR:AT1G20630; TAIR:AT1G20630; TAIR:AT1G20630; TAIR:AT1G20630; TAIR:AT1G20630; TAIR:AT1G20630; TAIR:AT1G20630; TAIR:AT1G20630; TAIR:AT1G20630; TAIR:AT1G20630; TAIR:AT1G20630; TAIR:AT1G20630; TAIR:AT1G20630;…	PF06628.5	Catalase-rel	Family	IPR018028	Catalase related subgroup	N/A	Q0E4K1	4328073;	NP_001045673.1;	osa:4328073;	LOC_Os02g02400	NA	NA	NA	NA	NA	NA	NA	NA
XLOC_021684	XLOC_021684	LOC_Os02g04230	Chr2:1850857-1858653	2.98474	12.1368	2.02372	2.71805	0.0145	0.336721	no	CGMC_MAPKCMGC_2.7 - CGMC includes CDA, MAPK, GSK3, and CLKC kinases, expressed	GO:0005634; GO:0009719; GO:0007165; GO:0005829; GO:0006464; GO:0005739; GO:0016301; GO:0004871; GO:0005634; GO:0009719; GO:0007165; GO:0005829; GO:0006464; GO:0005739; GO:0016301; GO:0004871; GO:0005634; GO:0009719; GO:0007165; GO:0005829; GO:0006464; GO:0005739; GO:0016301; GO:0004871	cellular_component; biological_process; biological_process; cellular_component; biological_process; cellular_component; molecular_function; molecular_function; cellular_component; biological_process; biological_process; cellular_component; biological_process; cellular_component; molecular_function; molecular_function; cellular_component; biological_process; biological_process; cellular_component;…	nucleus; response to endogenous stimulus; signal transduction; cytosol; protein modification process; mitochondrion; kinase activity; signal transducer activity; nucleus; response to endogenous stimulus; signal transduction; cytosol; protein modification process; mitochondrion; kinase activity; signal transducer activity; nucleus; response to endogenous stimulus; signal transduction; cytosol; pro…	TAIR:AT3G18040; TAIR:AT3G18040; TAIR:AT3G18040; TAIR:AT3G18040; TAIR:AT3G18040; TAIR:AT3G18040; TAIR:AT3G18040; TAIR:AT3G18040; TAIR:AT3G18040; TAIR:AT3G18040; TAIR:AT3G18040; TAIR:AT3G18040; TAIR:AT3G18040; TAIR:AT3G18040; TAIR:AT3G18040; TAIR:AT3G18040; TAIR:AT3G18040; TAIR:AT3G18040; TAIR:AT3G18040; TAIR:AT3G18040; TAIR:AT3G18040; TAIR:AT3G18040; TAIR:AT3G18040; TAIR:AT3G18040	PF00069.18	Pkinase	Domain	IPR017442	Serine/threonine-protein kinase-like domain	Molecular Function: protein kinase activity (GO:0004672), Molecular Function: ATP binding (GO:0005524), Biological Process: protein amino acid phosphorylation (GO:0006468)	Q0E459	4328223;	NP_001045815.1;	osa:4328223;	LOC_Os02g04230	NA	NA	NA	NA	NA	NA	NA	NA
XLOC_021905	XLOC_021905	LOC_Os02g09490	Chr2:4870141-4874082	1.53474	7.34173	2.25813	2.54196	0.0236	0.434089	no	dehydrogenase, putative, expressed	GO:0003824; GO:0009058; GO:0009987; GO:0019748; GO:0005829; GO:0008152	molecular_function; biological_process; biological_process; biological_process; cellular_component; biological_process	catalytic activity; biosynthetic process; cellular process; secondary metabolic process; cytosol; metabolic process	TAIR:AT4G34230; TAIR:AT4G34230; TAIR:AT4G34230; TAIR:AT4G34230; TAIR:AT4G34230; TAIR:AT4G34230	PF00107.19	ADH_zinc_N	Family	N/A	N/A	N/A	Q6ZHS4	4328552;	NP_001046132.1;	osa:4328552;	LOC_Os02g09490	NA	NA	NA	NA	NA	NA	NA	NA
XLOC_021924	XLOC_021924	LOC_Os02g09810	Chr2:5058702-5061965	8.63277	34.5506	2.00082	3.11971	0.00285	0.146801	no	amino acid transporter, putative, expressed	GO:0016020; GO:0005773; GO:0006810; GO:0009987; GO:0005215; GO:0016020; GO:0005773; GO:0006810; GO:0009987; GO:0005215; GO:0016020; GO:0005773; GO:0006810; GO:0009987; GO:0005215	cellular_component; cellular_component; biological_process; biological_process; molecular_function; cellular_component; cellular_component; biological_process; biological_process; molecular_function; cellular_component; cellular_component; biological_process; biological_process; molecular_function	membrane; vacuole; transport; cellular process; transporter activity; membrane; vacuole; transport; cellular process; transporter activity; membrane; vacuole; transport; cellular process; transporter activity	TAIR:AT3G30390; TAIR:AT3G30390; TAIR:AT3G30390; TAIR:AT3G30390; TAIR:AT3G30390; TAIR:AT3G30390; TAIR:AT3G30390; TAIR:AT3G30390; TAIR:AT3G30390; TAIR:AT3G30390; TAIR:AT3G30390; TAIR:AT3G30390; TAIR:AT3G30390; TAIR:AT3G30390; TAIR:AT3G30390	PF01490.11	Aa_trans	Family	N/A	N/A	N/A	NA	NA	NA	NA	LOC_Os02g09810	NA	NA	NA	NA	NA	NA	NA	NA
XLOC_021976	XLOC_021976	LOC_Os02g10660	Chr2:5610653-5614476	2.69585	12.4636	2.20891	3.09801	0.0049	0.193583	no	glycosyl hydrolases family 17, putative, expressed	GO:0005488; GO:0016787; GO:0008152; GO:0005975; GO:0003824; GO:0016020	molecular_function; molecular_function; biological_process; biological_process; molecular_function; cellular_component	binding; hydrolase activity; metabolic process; carbohydrate metabolic process; catalytic activity; membrane	TAIR:AT2G26600; TAIR:AT2G26600; TAIR:AT2G26600; TAIR:AT2G26600; TAIR:AT2G26600; TAIR:AT2G26600	PF00332.11	Glyco_hydro_17	Domain	N/A	N/A	N/A	NA	NA	NA	NA	LOC_Os02g10660	NA	NA	NA	NA	NA	NA	NA	NA
XLOC_022017	XLOC_022017	LOC_Os02g11859	Chr2:6145981-6146678	1.4987	9.55934	2.6732	2.52183	0.04045	0.561629	no	expressed protein	NA	NA	NA	NA	PF06376.5	DUF1070	Family	N/A	N/A	N/A	NA	NA	NA	NA	LOC_Os02g11859	NA	NA	NA	NA	NA	NA	NA	NA
XLOC_022024	XLOC_022024	LOC_Os02g11980,LOC_Os02g12010,LOC_Os02g12030,LOC_Os02g12040	Chr2:6208683-6256373	1.31949	11.1675	3.08126	4.17976	0.00065	0.0608584	no	receptor-like protein kinase precursor, putative, expressed	GO:0007165; GO:0016301; GO:0000166; GO:0006464; GO:0005886	biological_process; molecular_function; molecular_function; biological_process; cellular_component	signal transduction; kinase activity; nucleotide binding; protein modification process; plasma membrane	TAIR:AT3G47570; TAIR:AT3G47570; TAIR:AT3G47570; TAIR:AT3G47570; TAIR:AT3G47570	PF00560.26	LRR_1	Repeat	N/A	N/A	N/A	NA	NA	NA	NA	LOC_Os02g11980	NA	NA	NA	NA	NA	NA	NA	NA
XLOC_022277	XLOC_022277	LOC_Os02g17360	Chr2:9981496-9985907	0.7105	3.57866	2.33251	2.61196	0.02375	0.435033	no	PPR repeat domain containing protein, putative, expressed	GO:0008152; GO:0005739; GO:0004518; GO:0006139; GO:0009536; GO:0008152; GO:0005739; GO:0004518; GO:0006139; GO:0009536	biological_process; cellular_component; molecular_function; biological_process; cellular_component; biological_process; cellular_component; molecular_function; biological_process; cellular_component	metabolic process; mitochondrion; nuclease activity; nucleobase, nucleoside, nucleotide and nucleic acid metabolic process; plastid; metabolic process; mitochondrion; nuclease activity; nucleobase, nucleoside, nucleotide and nucleic acid metabolic process; plastid	TAIR:AT2G32230; TAIR:AT2G32230; TAIR:AT2G32230; TAIR:AT2G32230; TAIR:AT2G32230; TAIR:AT2G32230; TAIR:AT2G32230; TAIR:AT2G32230; TAIR:AT2G32230; TAIR:AT2G32230	PF01535.13	PPR	Family	IPR021869	Ribonuclease Zc3h12a-like	N/A	NA	NA	NA	NA	LOC_Os02g17360	NA	NA	NA	NA	NA	NA	NA	NA
XLOC_023060	XLOC_023060	LOC_Os02g34790	Chr2:20857043-20861343	0.429923	2.2138	2.36438	2.30928	0.0437	0.578222	no	receptor-like protein kinase 5 precursor, putative, expressed	GO:0016020; GO:0008152; GO:0009987; GO:0005575; GO:0016301; GO:0006464; GO:0005886	cellular_component; biological_process; biological_process; cellular_component; molecular_function; biological_process; cellular_component	membrane; metabolic process; cellular process; cellular_component; kinase activity; protein modification process; plasma membrane	TAIR:AT4G08850; TAIR:AT4G08850; TAIR:AT4G08850; TAIR:AT4G08850; TAIR:AT4G08850; TAIR:AT4G08850; TAIR:AT4G08850	PF00069.18	Pkinase	Domain	N/A	N/A	N/A	NA	NA	NA	NA	LOC_Os02g34790	NA	NA	NA	NA	NA	NA	NA	NA
XLOC_023169	XLOC_023169	LOC_Os02g36940	Chr2:22311832-22313162	14.1138	81.2917	2.526	3.81164	0.0007	0.0632991	no	uncharacterized Cys-rich domain containing protein, putative, expressed	GO:0006950; GO:0003674; GO:0005886	biological_process; molecular_function; cellular_component	response to stress; molecular_function; plasma membrane	TAIR:AT1G14870; TAIR:AT1G14870; TAIR:AT1G14870	PF04749.10	PLAC8	Family	IPR006461	Protein of unknown function Cys-rich	N/A	NA	NA	NA	NA	LOC_Os02g36940	NA	NA	NA	NA	NA	NA	NA	NA
XLOC_023389	XLOC_023389	LOC_Os02g40784	Chr2:24718046-24724120	2.06682	20.53	3.31225	4.48834	0.0002	0.0301425	yes	WAX2, putative, expressed	GO:0006950; GO:0009607; GO:0005783; GO:0007275; GO:0009628; GO:0009056; GO:0009987; GO:0009058; GO:0006629; GO:0005623; GO:0003824; GO:0006950; GO:0009607; GO:0005783; GO:0007275; GO:0009628; GO:0009056; GO:0009987; GO:0009058; GO:0006629; GO:0005623; GO:0003824	biological_process; biological_process; cellular_component; biological_process; biological_process; biological_process; biological_process; biological_process; biological_process; cellular_component; molecular_function; biological_process; biological_process; cellular_component; biological_process; biological_process; biological_process; biological_process; biological_process; biological_process;…	response to stress; response to biotic stimulus; endoplasmic reticulum; multicellular organismal development; response to abiotic stimulus; catabolic process; cellular process; biosynthetic process; lipid metabolic process; cell; catalytic activity; response to stress; response to biotic stimulus; endoplasmic reticulum; multicellular organismal development; response to abiotic stimulus; catabolic…	TAIR:AT1G02205; TAIR:AT1G02205; TAIR:AT1G02205; TAIR:AT1G02205; TAIR:AT1G02205; TAIR:AT1G02205; TAIR:AT1G02205; TAIR:AT1G02205; TAIR:AT1G02205; TAIR:AT1G02205; TAIR:AT1G02205; TAIR:AT1G02205; TAIR:AT1G02205; TAIR:AT1G02205; TAIR:AT1G02205; TAIR:AT1G02205; TAIR:AT1G02205; TAIR:AT1G02205; TAIR:AT1G02205; TAIR:AT1G02205; TAIR:AT1G02205; TAIR:AT1G02205	PF12076.1	Wax2_C	Domain	N/A	N/A	N/A	NA	NA	NA	NA	LOC_Os02g40784	NA	NA	NA	NA	NA	NA	NA	NA
XLOC_023392	XLOC_023392	LOC_Os02g40840	Chr2:24749295-24754919	1.30891	6.03048	2.20391	2.86244	0.0111	0.295219	no	alcohol oxidase, putative, expressed	GO:0003824; GO:0003674; GO:0005623; GO:0005783; GO:0005488; GO:0008152	molecular_function; molecular_function; cellular_component; cellular_component; molecular_function; biological_process	catalytic activity; molecular_function; cell; endoplasmic reticulum; binding; metabolic process	TAIR:AT4G28570; TAIR:AT4G28570; TAIR:AT4G28570; TAIR:AT4G28570; TAIR:AT4G28570; TAIR:AT4G28570	PF05199.6	GMC_oxred_C	Domain	IPR007867	Glucose-methanol-choline oxidoreductase, C-terminal	Molecular Function: oxidoreductase activity, acting on CH-OH group of donors (GO:0016614)	NA	NA	NA	NA	LOC_Os02g40840	NA	NA	NA	NA	NA	NA	NA	NA
XLOC_023408	XLOC_023408	LOC_Os02g41630	Chr2:24973385-24977336	9.58856	57.3831	2.58124	4.01237	0.0002	0.0301425	yes	phenylalanine ammonia-lyase, putative, expressed	GO:0009056; GO:0009987; GO:0019748; GO:0006950; GO:0003824; GO:0007275; GO:0008152; GO:0009628; GO:0005737; GO:0009058	biological_process; biological_process; biological_process; biological_process; molecular_function; biological_process; biological_process; biological_process; cellular_component; biological_process	catabolic process; cellular process; secondary metabolic process; response to stress; catalytic activity; multicellular organismal development; metabolic process; response to abiotic stimulus; cytoplasm; biosynthetic process	TAIR:AT2G37040; TAIR:AT2G37040; TAIR:AT2G37040; TAIR:AT2G37040; TAIR:AT2G37040; TAIR:AT2G37040; TAIR:AT2G37040; TAIR:AT2G37040; TAIR:AT2G37040; TAIR:AT2G37040	PF00221.12	PAL	Family	N/A	N/A	N/A	P14717	4330034;	NP_001047481.1;	osa:4330034;	LOC_Os02g41630	PWY-6457	<i>trans</i>-cinnamoyl-CoA biosynthesis	PHENYLALANINE-AMMONIA-LYASE-RXN	EC-4.3.1.25	GN7F-20592-MONOMER		GN7F-20592	LOC_Os12g33610.1
XLOC_023420	XLOC_023420	LOC_Os02g41840	Chr2:25153198-25154265	0.720638	9.22399	3.67804	3.44963	0.02225	0.42142	no	DUF584 domain containing protein, putative, expressed	GO:0003674; GO:0005575; GO:0005515; GO:0008150	molecular_function; cellular_component; molecular_function; biological_process	molecular_function; cellular_component; protein binding; biological_process	TAIR:AT5G03230; TAIR:AT5G03230; TAIR:AT5G03230; TAIR:AT5G03230	PF04520.6	DUF584	Family	N/A	N/A	N/A	NA	NA	NA	NA	LOC_Os02g41840	NA	NA	NA	NA	NA	NA	NA	NA
XLOC_023448	XLOC_023448	LOC_Os02g42440	Chr2:25527600-25529056	1.64332	9.51058	2.53292	2.85055	0.0137	0.325137	no	GEM, putative, expressed	GO:0003674; GO:0005575; GO:0008150	molecular_function; cellular_component; biological_process	molecular_function; cellular_component; biological_process	TAIR:AT5G23370; TAIR:AT5G23370; TAIR:AT5G23370	PF02893.13	GRAM	Family	IPR004182	GRAM	N/A	NA	NA	NA	NA	LOC_Os02g42440	NA	NA	NA	NA	NA	NA	NA	NA
XLOC_023691	XLOC_023691	LOC_Os02g46850,LOC_Os02g46860	Chr2:28581545-28587981	2.43909	36.1694	3.89036	5.17588	0.0001	0.0199623	yes	oligopeptide transporter, putative, expressed	GO:0016020; GO:0006810; GO:0009628; GO:0005215	cellular_component; biological_process; biological_process; molecular_function	membrane; transport; response to abiotic stimulus; transporter activity	TAIR:AT5G64410; TAIR:AT5G64410; TAIR:AT5G64410; TAIR:AT5G64410	PF03169.8	OPT	Family	N/A	N/A	N/A	NA	NA	NA	NA	LOC_Os02g46850	NA	NA	NA	NA	NA	NA	NA	NA
XLOC_023742	XLOC_023742	LOC_Os02g47840	Chr2:29257795-29265497	7.12587	38.5883	2.43703	2.44226	0.0219	0.419902	no	universal stress protein domain containing protein, putative, expressed	GO:0003674; GO:0005575; GO:0006950	molecular_function; cellular_component; biological_process	molecular_function; cellular_component; response to stress	TAIR:AT5G14680; TAIR:AT5G14680; TAIR:AT5G14680	PF00582.19	Usp	Domain	IPR006016	UspA	Biological Process: response to stress (GO:0006950)	NA	NA	NA	NA	LOC_Os02g47840	NA	NA	NA	NA	NA	NA	NA	NA
XLOC_023846	XLOC_023846	LOC_Os02g49720	Chr2:30392546-30396775	0.257657	2.03681	2.98279	2.48875	0.0187	0.385922	no	aldehyde dehydrogenase, putative, expressed	GO:0003824; GO:0008152; GO:0005739; GO:0003824; GO:0008152; GO:0005739; GO:0003824; GO:0008152; GO:0005739; GO:0003824; GO:0008152; GO:0005739; GO:0003824; GO:0008152; GO:0005739	molecular_function; biological_process; cellular_component; molecular_function; biological_process; cellular_component; molecular_function; biological_process; cellular_component; molecular_function; biological_process; cellular_component; molecular_function; biological_process; cellular_component	catalytic activity; metabolic process; mitochondrion; catalytic activity; metabolic process; mitochondrion; catalytic activity; metabolic process; mitochondrion; catalytic activity; metabolic process; mitochondrion; catalytic activity; metabolic process; mitochondrion	TAIR:AT1G23800; TAIR:AT1G23800; TAIR:AT1G23800; TAIR:AT1G23800; TAIR:AT1G23800; TAIR:AT1G23800; TAIR:AT1G23800; TAIR:AT1G23800; TAIR:AT1G23800; TAIR:AT1G23800; TAIR:AT1G23800; TAIR:AT1G23800; TAIR:AT1G23800; TAIR:AT1G23800; TAIR:AT1G23800	PF00171.15	Aldedh	Family	IPR015590	Aldehyde dehydrogenase	Biological Process: metabolic process (GO:0008152), Molecular Function: oxidoreductase activity (GO:0016491), Biological Process: oxidation reduction (GO:0055114)	NA	NA	NA	NA	LOC_Os02g49720	NA	NA	NA	NA	NA	NA	NA	NA
XLOC_024051	XLOC_024051	LOC_Os02g53750	Chr2:32915307-32918514	0.809352	3.99829	2.30454	2.44484	0.03155	0.496282	no	tyrosine protein kinase domain containing protein, putative, expressed	GO:0005575; GO:0008152; GO:0009987; GO:0016301; GO:0006950; GO:0009607; GO:0005575; GO:0008152; GO:0009987; GO:0016301; GO:0006950; GO:0009607	cellular_component; biological_process; biological_process; molecular_function; biological_process; biological_process; cellular_component; biological_process; biological_process; molecular_function; biological_process; biological_process	cellular_component; metabolic process; cellular process; kinase activity; response to stress; response to biotic stimulus; cellular_component; metabolic process; cellular process; kinase activity; response to stress; response to biotic stimulus	TAIR:AT2G05940; TAIR:AT2G05940; TAIR:AT2G05940; TAIR:AT2G05940; TAIR:AT2G05940; TAIR:AT2G05940; TAIR:AT2G05940; TAIR:AT2G05940; TAIR:AT2G05940; TAIR:AT2G05940; TAIR:AT2G05940; TAIR:AT2G05940	PF07714.10	Pkinase_Tyr	Domain	IPR011009	Protein kinase-like domain	N/A	NA	NA	NA	NA	LOC_Os02g53750	NA	NA	NA	NA	NA	NA	NA	NA
XLOC_024073	XLOC_024073	LOC_Os02g54254	Chr2:33253086-33266582	12.7617	62.0323	2.28119	3.30937	0.0007	0.0632991	no	saccharopine dehydrogenase, putative, expressed	GO:0003824; GO:0009628; GO:0005829; GO:0009987; GO:0009056; GO:0008152; GO:0005737; GO:0003824; GO:0009628; GO:0005829; GO:0009987; GO:0009056; GO:0008152; GO:0005737; GO:0003824; GO:0009628; GO:0005829; GO:0009987; GO:0009056; GO:0008152; GO:0005737; GO:0003824; GO:0009628; GO:0005829; GO:0009987; GO:0009056; GO:0008152; GO:0005737	molecular_function; biological_process; cellular_component; biological_process; biological_process; biological_process; cellular_component; molecular_function; biological_process; cellular_component; biological_process; biological_process; biological_process; cellular_component; molecular_function; biological_process; cellular_component; biological_process; biological_process; biological_process;…	catalytic activity; response to abiotic stimulus; cytosol; cellular process; catabolic process; metabolic process; cytoplasm; catalytic activity; response to abiotic stimulus; cytosol; cellular process; catabolic process; metabolic process; cytoplasm; catalytic activity; response to abiotic stimulus; cytosol; cellular process; catabolic process; metabolic process; cytoplasm; catalytic activity; r…	TAIR:AT4G33150; TAIR:AT4G33150; TAIR:AT4G33150; TAIR:AT4G33150; TAIR:AT4G33150; TAIR:AT4G33150; TAIR:AT4G33150; TAIR:AT4G33150; TAIR:AT4G33150; TAIR:AT4G33150; TAIR:AT4G33150; TAIR:AT4G33150; TAIR:AT4G33150; TAIR:AT4G33150; TAIR:AT4G33150; TAIR:AT4G33150; TAIR:AT4G33150; TAIR:AT4G33150; TAIR:AT4G33150; TAIR:AT4G33150; TAIR:AT4G33150; TAIR:AT4G33150; TAIR:AT4G33150; TAIR:AT4G33150; TAIR:AT4G33150;…	PF05222.8	AlaDh_PNT_N	Domain	N/A	N/A	N/A	NA	NA	NA	NA	LOC_Os02g54254	NA	NA	NA	NA	NA	NA	NA	NA
XLOC_024081	XLOC_024081	LOC_Os02g54360	Chr2:33321191-33322539	1.71881	7.57809	2.14042	2.21005	0.04955	0.610006	no	enzyme of the cupin superfamily protein, putative, expressed	GO:0003674; GO:0008150	molecular_function; biological_process	molecular_function; biological_process	TAIR:AT2G32650; TAIR:AT2G32650	PF05899.5	Cupin_3	Family	IPR008579	Protein of unknown function DUF861, cupin-3	N/A	NA	NA	NA	NA	LOC_Os02g54360	NA	NA	NA	NA	NA	NA	NA	NA
XLOC_024135	XLOC_024135	LOC_Os02g55610	Chr2:34058138-34059033	1.54825	8.2903	2.42078	2.43382	0.04325	0.575434	no	serine-rich protein, putative, expressed	GO:0003674; GO:0008150	molecular_function; biological_process	molecular_function; biological_process	TAIR:AT5G25280; TAIR:AT5G25280	NA	NA	NA	N/A	N/A	N/A	NA	NA	NA	NA	LOC_Os02g55610	NA	NA	NA	NA	NA	NA	NA	NA
XLOC_024224	XLOC_024224	LOC_Os02g57560	Chr2:35263165-35265393	1.03239	4.37901	2.08461	2.23457	0.0318	0.498583	no	tyrosine protein kinase domain containing protein, putative, expressed	GO:0008152; GO:0009987; GO:0007275; GO:0016301; GO:0000166; GO:0006464	biological_process; biological_process; biological_process; molecular_function; molecular_function; biological_process	metabolic process; cellular process; multicellular organismal development; kinase activity; nucleotide binding; protein modification process	TAIR:AT4G00330; TAIR:AT4G00330; TAIR:AT4G00330; TAIR:AT4G00330; TAIR:AT4G00330; TAIR:AT4G00330	PF00069.18	Pkinase	Domain	IPR002290	Serine/threonine-protein kinase domain	Molecular Function: protein serine/threonine kinase activity (GO:0004674), Molecular Function: ATP binding (GO:0005524), Biological Process: protein amino acid phosphorylation (GO:0006468)	NA	NA	NA	NA	LOC_Os02g57560	NA	NA	NA	NA	NA	NA	NA	NA
XLOC_024226	XLOC_024226	LOC_Os02g57670	Chr2:35320312-35322987	7.23061	33.0323	2.19169	3.07236	0.0059	0.210743	no	ribosomal L9, putative, expressed	GO:0005840; GO:0009536; GO:0009987; GO:0006412; GO:0005198	cellular_component; cellular_component; biological_process; biological_process; molecular_function	ribosome; plastid; cellular process; translation; structural molecule activity	TAIR:AT3G44890; TAIR:AT3G44890; TAIR:AT3G44890; TAIR:AT3G44890; TAIR:AT3G44890	PF03948.7	Ribosomal_L9_C	Domain	IPR020069	Ribosomal protein L9, C-terminal	N/A	NA	NA	NA	NA	LOC_Os02g57670	NA	NA	NA	NA	NA	NA	NA	NA
XLOC_024256	XLOC_024256	LOC_Os02g58120	Chr2:35567713-35570424	0.494532	4.75086	3.26405	2.5992	0.03395	0.516227	no	oxidoreductase/ transition metal ion binding protein, putative, expressed	GO:0003674; GO:0008150	molecular_function; biological_process	molecular_function; biological_process	TAIR:AT5G08400; TAIR:AT5G08400	PF12049.1	DUF3531	Family	N/A	N/A	N/A	NA	NA	NA	NA	LOC_Os02g58120	NA	NA	NA	NA	NA	NA	NA	NA
XLOC_024381	XLOC_024381	LOC_Os03g02550	Chr3:942693-945066	2.30257	14.0364	2.60786	3.37006	0.0055	0.205328	no	OsFBX76 - F-box domain containing protein, expressed	GO:0006950; GO:0030246; GO:0005515; GO:0009058; GO:0006464	biological_process; molecular_function; molecular_function; biological_process; biological_process	response to stress; carbohydrate binding; protein binding; biosynthetic process; protein modification process	TAIR:AT3G61060; TAIR:AT3G61060; TAIR:AT3G61060; TAIR:AT3G61060; TAIR:AT3G61060	NA	NA	NA	IPR001810	F-box domain, cyclin-like	N/A	Q10SN2	4331405;	NP_001048762.1;	osa:4331405;	LOC_Os03g02550	NA	NA	NA	NA	NA	NA	NA	NA
XLOC_024460	XLOC_024460	LOC_Os03g04020	Chr3:1831093-1833778	12.9885	54.4416	2.06747	3.18551	0.00205	0.121303	no	expansin precursor, putative, expressed	GO:0016043; GO:0009653; GO:0016049; GO:0005618; GO:0005575; GO:0009987; GO:0008150; GO:0005623; GO:0016043; GO:0009653; GO:0016049; GO:0009987; GO:0005576	biological_process; biological_process; biological_process; cellular_component; cellular_component; biological_process; biological_process; cellular_component; biological_process; biological_process; biological_process; biological_process; cellular_component	cellular component organization; anatomical structure morphogenesis; cell growth; cell wall; cellular_component; cellular process; biological_process; cell; cellular component organization; anatomical structure morphogenesis; cell growth; cellular process; extracellular region	TAIR:AT3G45970; TAIR:AT3G45970; TAIR:AT3G45970; TAIR:AT3G45970; TAIR:AT3G45970; TAIR:AT3G45970; TAIR:AT4G38400; TAIR:AT4G38400; TAIR:AT4G38400; TAIR:AT4G38400; TAIR:AT4G38400; TAIR:AT4G38400; TAIR:AT4G38400	PF03330.11	DPBB_1	Domain	N/A	N/A	N/A	Q10S70	4331516;	NP_001048868.1;	osa:4331516;	LOC_Os03g04020	NA	NA	NA	NA	NA	NA	NA	NA
XLOC_024463	XLOC_024463	LOC_Os03g04060	Chr3:1860426-1861786	25.694	117.167	2.18907	3.47403	0.0006	0.0580256	no	CHIT16 - Chitinase family protein precursor, expressed	GO:0006950; GO:0009607; GO:0008152; GO:0005773; GO:0016020; GO:0008150; GO:0005829; GO:0007165; GO:0009719; GO:0016787	biological_process; biological_process; biological_process; cellular_component; cellular_component; biological_process; cellular_component; biological_process; biological_process; molecular_function	response to stress; response to biotic stimulus; metabolic process; vacuole; membrane; biological_process; cytosol; signal transduction; response to endogenous stimulus; hydrolase activity	TAIR:AT3G12500; TAIR:AT3G12500; TAIR:AT3G12500; TAIR:AT3G12500; TAIR:AT3G12500; TAIR:AT3G12500; TAIR:AT3G12500; TAIR:AT3G12500; TAIR:AT3G12500; TAIR:AT3G12500	PF00182.12	Glyco_hydro_19	Domain	IPR000726	Glycoside hydrolase, family 19, catalytic	Molecular Function: chitinase activity (GO:0004568), Biological Process: chitin catabolic process (GO:0006032), Biological Process: cell wall macromolecule catabolic process (GO:0016998)	Q10S66	4331519;	NP_001048871.1;	osa:4331519;	LOC_Os03g04060	PWY-6902	chitin degradation II	3.2.1.14-RXN	EC-3.2.1.14	GN7F-25606-MONOMER	chitinase	GN7F-25606	LOC_Os05g33130.1
XLOC_024477	XLOC_024477	LOC_Os03g04470	Chr3:2073417-2075029	1.23947	7.63979	2.62381	2.75191	0.03035	0.490084	no	expressed protein	GO:0003674; GO:0009536	molecular_function; cellular_component	molecular_function; plastid	TAIR:AT2G36885; TAIR:AT2G36885	NA	NA	NA	N/A	N/A	N/A	Q10S26	4331552;	NP_001048903.1;	osa:4331552;	LOC_Os03g04470	NA	NA	NA	NA	NA	NA	NA	NA
XLOC_024559	XLOC_024559	LOC_Os03g05900	Chr3:2958311-2960616	2.16155	21.8691	3.33875	4.32257	0.0016	0.105405	no	expressed protein	GO:0006950; GO:0009607; GO:0003824; GO:0008152; GO:0006950; GO:0009607; GO:0003824; GO:0008152	biological_process; biological_process; molecular_function; biological_process; biological_process; biological_process; molecular_function; biological_process	response to stress; response to biotic stimulus; catalytic activity; metabolic process; response to stress; response to biotic stimulus; catalytic activity; metabolic process	TAIR:AT4G38540; TAIR:AT4G38540; TAIR:AT4G38540; TAIR:AT4G38540; TAIR:AT4G38540; TAIR:AT4G38540; TAIR:AT4G38540; TAIR:AT4G38540	PF01494.12	FAD_binding_3	Family	N/A	N/A	N/A	Q10RL9	4331658;	NP_001049000.1;	osa:4331658;	LOC_Os03g05900	NA	NA	NA	NA	NA	NA	NA	NA
XLOC_024575	XLOC_024575	LOC_Os03g06200	Chr3:3110723-3112543	1.39203	6.1398	2.14101	2.49633	0.02875	0.478413	no	aminotransferase, putative, expressed	GO:0008152; GO:0016740; GO:0009058; GO:0009987; GO:0009536	biological_process; molecular_function; biological_process; biological_process; cellular_component	metabolic process; transferase activity; biosynthetic process; cellular process; plastid	TAIR:AT4G35630; TAIR:AT4G35630; TAIR:AT4G35630; TAIR:AT4G35630; TAIR:AT4G35630	PF00266.12	Aminotran_5	Domain	N/A	N/A	N/A	Q8LMR0	NA	NA	NA	LOC_Os03g06200	SERSYN-PWY	serine biosynthesis	PSERTRANSAM-RXN	EC-2.6.1.52	GN7F-24333-MONOMER		GN7F-24333	LOC_Os03g06200.1
XLOC_024639	XLOC_024639	LOC_Os03g07570	Chr3:3854303-3858411	5.72774	23.4522	2.03369	2.8526	0.00675	0.225	no	aminotransferase, putative, expressed	GO:0016020; GO:0005773; GO:0008150; GO:0008152; GO:0016740; GO:0009987; GO:0009056; GO:0005488; GO:0005739; GO:0016020; GO:0005773; GO:0008150; GO:0008152; GO:0016740; GO:0009987; GO:0009056; GO:0005488; GO:0005739; GO:0016020; GO:0005773; GO:0008150; GO:0008152; GO:0016740; GO:0009987; GO:0009056; GO:0005488; GO:0005739	cellular_component; cellular_component; biological_process; biological_process; molecular_function; biological_process; biological_process; molecular_function; cellular_component; cellular_component; cellular_component; biological_process; biological_process; molecular_function; biological_process; biological_process; molecular_function; cellular_component; cellular_component; cellular_component;…	membrane; vacuole; biological_process; metabolic process; transferase activity; cellular process; catabolic process; binding; mitochondrion; membrane; vacuole; biological_process; metabolic process; transferase activity; cellular process; catabolic process; binding; mitochondrion; membrane; vacuole; biological_process; metabolic process; transferase activity; cellular process; catabolic process; …	TAIR:AT4G39660; TAIR:AT4G39660; TAIR:AT4G39660; TAIR:AT4G39660; TAIR:AT4G39660; TAIR:AT4G39660; TAIR:AT4G39660; TAIR:AT4G39660; TAIR:AT4G39660; TAIR:AT4G39660; TAIR:AT4G39660; TAIR:AT4G39660; TAIR:AT4G39660; TAIR:AT4G39660; TAIR:AT4G39660; TAIR:AT4G39660; TAIR:AT4G39660; TAIR:AT4G39660; TAIR:AT4G39660; TAIR:AT4G39660; TAIR:AT4G39660; TAIR:AT4G39660; TAIR:AT4G39660; TAIR:AT4G39660; TAIR:AT4G39660;…	PF00202.14	Aminotran_3	Domain	IPR015422	Pyridoxal phosphate-dependent transferase, major region, subdomain 2	Molecular Function: catalytic activity (GO:0003824), Molecular Function: pyridoxal phosphate binding (GO:0030170)	Q10R45	4331779;	NP_001049115.1;	osa:4331779;	LOC_Os03g07570	NA	NA	NA	NA	NA	NA	NA	NA
XLOC_024690	XLOC_024690	LOC_Os03g08624	Chr3:4441955-4443834	3.59683	41.2904	3.52101	4.67564	0.00085	0.0729951	no	dihydroflavonol-4-reductase, putative, expressed	GO:0005783; GO:0008152; GO:0005773; GO:0016020; GO:0009987; GO:0006629; GO:0009719; GO:0007165; GO:0005886; GO:0003824	cellular_component; biological_process; cellular_component; cellular_component; biological_process; biological_process; biological_process; biological_process; cellular_component; molecular_function	endoplasmic reticulum; metabolic process; vacuole; membrane; cellular process; lipid metabolic process; response to endogenous stimulus; signal transduction; plasma membrane; catalytic activity	TAIR:AT4G33360; TAIR:AT4G33360; TAIR:AT4G33360; TAIR:AT4G33360; TAIR:AT4G33360; TAIR:AT4G33360; TAIR:AT4G33360; TAIR:AT4G33360; TAIR:AT4G33360; TAIR:AT4G33360	PF01370.14	Epimerase	Family	IPR016040	NAD(P)-binding domain	Molecular Function: catalytic activity (GO:0003824), Molecular Function: binding (GO:0005488), Biological Process: metabolic process (GO:0008152)	NA	NA	NA	NA	LOC_Os03g08624	NA	NA	NA	NA	NA	NA	NA	NA
XLOC_024731	XLOC_024731	LOC_Os03g09900	Chr3:4923845-4926167	2.33623	29.0137	3.63448	4.79756	0.0006	0.0580256	no	membrane protein, putative, expressed	GO:0016020; GO:0007275	cellular_component; biological_process	membrane; multicellular organismal development	TAIR:AT4G12980; TAIR:AT4G12980	PF04526.6	DUF568	Family	IPR006593	Cytochrome b561/ferric reductase transmembrane	N/A	Q8H7W7	4331929;	NP_001049254.1;	osa:4331929;	LOC_Os03g09900	NA	NA	NA	NA	NA	NA	NA	NA
XLOC_024770	XLOC_024770	LOC_Os03g10620	Chr3:5422147-5426577	28.0882	175.037	2.63963	3.93618	5e-05	0.0117035	yes	hydrolase, alpha/beta fold family domain containing protein, expressed	GO:0008152; GO:0003824; GO:0008152; GO:0003824; GO:0008152; GO:0003824	biological_process; molecular_function; biological_process; molecular_function; biological_process; molecular_function	metabolic process; catalytic activity; metabolic process; catalytic activity; metabolic process; catalytic activity	TAIR:AT3G03990; TAIR:AT3G03990; TAIR:AT3G03990; TAIR:AT3G03990; TAIR:AT3G03990; TAIR:AT3G03990	PF00561.13	Abhydrolase_1	Domain	N/A	N/A	N/A	Q10QA5	4331983;	NP_001049306.1;	osa:4331983;	LOC_Os03g10620	NA	NA	NA	NA	NA	NA	NA	NA
XLOC_024783	XLOC_024783	LOC_Os03g10950	Chr3:5625732-5627797	0.40742	5.20966	3.6766	3.44828	0.02225	0.42142	no	protein phosphatase 2C, putative, expressed	GO:0005623; GO:0006464; GO:0008152; GO:0009987; GO:0003824; GO:0005739; GO:0016787	cellular_component; biological_process; biological_process; biological_process; molecular_function; cellular_component; molecular_function	cell; protein modification process; metabolic process; cellular process; catalytic activity; mitochondrion; hydrolase activity	TAIR:AT4G33920; TAIR:AT4G33920; TAIR:AT4G33920; TAIR:AT4G33920; TAIR:AT4G33920; TAIR:AT4G33920; TAIR:AT4G33920	PF00481.14	PP2C	Family	IPR001932	Protein phosphatase 2C-related	Molecular Function: catalytic activity (GO:0003824)	Q8H063	4332004;	NP_001049326.1;	osa:4332004;	LOC_Os03g10950	NA	NA	NA	NA	NA	NA	NA	NA
XLOC_024870	XLOC_024870	LOC_Os03g12470	Chr3:6589593-6594042	2.37007	13.8297	2.54476	3.4809	0.0022	0.12789	no	OsWAK25 - OsWAK receptor-like protein kinase, expressed	GO:0005575; GO:0008152; GO:0009987; GO:0016301; GO:0006464	cellular_component; biological_process; biological_process; molecular_function; biological_process	cellular_component; metabolic process; cellular process; kinase activity; protein modification process	TAIR:AT2G23450; TAIR:AT2G23450; TAIR:AT2G23450; TAIR:AT2G23450; TAIR:AT2G23450	PF00069.18	Pkinase	Domain	IPR008271	Serine/threonine-protein kinase, active site	Molecular Function: protein serine/threonine kinase activity (GO:0004674), Biological Process: protein amino acid phosphorylation (GO:0006468)	Q8H7R6	4332120;	NP_001049435.1;	osa:4332120;	LOC_Os03g12470	NA	NA	NA	NA	NA	NA	NA	NA
XLOC_024872	XLOC_024872	LOC_Os03g12500	Chr3:6608576-6610598	0.355043	4.92665	3.79454	3.55782	0.02125	0.411617	no	cytochrome P450, putative, expressed	GO:0016020; GO:0009536; GO:0009579; GO:0009607; GO:0003824; GO:0019825; GO:0005739; GO:0009987; GO:0006629; GO:0006950; GO:0009719; GO:0009058	cellular_component; cellular_component; cellular_component; biological_process; molecular_function; molecular_function; cellular_component; biological_process; biological_process; biological_process; biological_process; biological_process	membrane; plastid; thylakoid; response to biotic stimulus; catalytic activity; oxygen binding; mitochondrion; cellular process; lipid metabolic process; response to stress; response to endogenous stimulus; biosynthetic process	TAIR:AT5G42650; TAIR:AT5G42650; TAIR:AT5G42650; TAIR:AT5G42650; TAIR:AT5G42650; TAIR:AT5G42650; TAIR:AT5G42650; TAIR:AT5G42650; TAIR:AT5G42650; TAIR:AT5G42650; TAIR:AT5G42650; TAIR:AT5G42650	PF00067.15	p450	Domain	N/A	N/A	N/A	Q7XYS3;; Q10PQ1	4332121;	NP_001049436.1;	osa:4332121;	LOC_Os03g12500	PWY-5408	9-lipoxygenase and 9-hydroperoxide lyase pathway	RXN-8502	-	GN7F-29782-MONOMER	LOC_Os02g12690.1	GN7F-29782	LOC_Os02g12690.1
XLOC_024896	XLOC_024896	LOC_Os03g12890	Chr3:6947874-6957390	5.24147	89.329	4.09109	5.49127	5e-05	0.0117035	yes	aminotransferase domain containing protein, putative, expressed	GO:0016740; GO:0008152; GO:0009987; GO:0003824; GO:0005739; GO:0009536; GO:0016740; GO:0008152; GO:0009987; GO:0003824; GO:0005739; GO:0009536; GO:0016740; GO:0008152; GO:0009987; GO:0003824; GO:0005739; GO:0009536; GO:0016740; GO:0008152; GO:0009987; GO:0003824; GO:0005739; GO:0009536; GO:0016740; GO:0008152; GO:0009987; GO:0003824; GO:0005739; GO:0009536	molecular_function; biological_process; biological_process; molecular_function; cellular_component; cellular_component; molecular_function; biological_process; biological_process; molecular_function; cellular_component; cellular_component; molecular_function; biological_process; biological_process; molecular_function; cellular_component; cellular_component; molecular_function; biological_process;…	transferase activity; metabolic process; cellular process; catalytic activity; mitochondrion; plastid; transferase activity; metabolic process; cellular process; catalytic activity; mitochondrion; plastid; transferase activity; metabolic process; cellular process; catalytic activity; mitochondrion; plastid; transferase activity; metabolic process; cellular process; catalytic activity; mitochondri…	TAIR:AT5G65780; TAIR:AT5G65780; TAIR:AT5G65780; TAIR:AT5G65780; TAIR:AT5G65780; TAIR:AT5G65780; TAIR:AT5G65780; TAIR:AT5G65780; TAIR:AT5G65780; TAIR:AT5G65780; TAIR:AT5G65780; TAIR:AT5G65780; TAIR:AT5G65780; TAIR:AT5G65780; TAIR:AT5G65780; TAIR:AT5G65780; TAIR:AT5G65780; TAIR:AT5G65780; TAIR:AT5G65780; TAIR:AT5G65780; TAIR:AT5G65780; TAIR:AT5G65780; TAIR:AT5G65780; TAIR:AT5G65780; TAIR:AT5G65780;…	PF01063.12	Aminotran_4	Domain	IPR005786	Branched-chain amino acid aminotransferase II	Molecular Function: branched-chain-amino-acid transaminase activity (GO:0004084), Biological Process: branched chain family amino acid metabolic process (GO:0009081)	Q8GRH8;; Q10PK8;; Q10PL0;; Q10PK7	4332151;	NP_001049461.1;	osa:4332151;	LOC_Os03g12890	NA	NA	NA	NA	NA	NA	NA	NA
XLOC_025054	XLOC_025054	LOC_Os03g16350	Chr3:9022589-9023976	2.81282	12.3702	2.13678	2.72198	0.0119	0.302358	no	DNA binding protein, putative, expressed	GO:0008150; GO:0009536	biological_process; cellular_component	biological_process; plastid	TAIR:AT3G55560; TAIR:AT3G55560	PF03479.8	DUF296	Domain	N/A	N/A	N/A	Q84K39	4332382;	NP_001049682.1;	osa:4332382;	LOC_Os03g16350	NA	NA	NA	NA	NA	NA	NA	NA
XLOC_025120	XLOC_025120	LOC_Os03g17690	Chr3:9843326-9846747	12.6204	104.395	3.04823	4.56814	5e-05	0.0117035	yes	OsAPx1 - Cytosolic Ascorbate Peroxidase encoding gene 1-8, expressed	GO:0003824; GO:0005575; GO:0008152; GO:0006950; GO:0009628; GO:0008150; GO:0005618; GO:0005515; GO:0005829; GO:0009056; GO:0009987; GO:0005886; GO:0000003; GO:0009791; GO:0009790; GO:0009536; GO:0003824; GO:0005575; GO:0008152; GO:0006950; GO:0009628; GO:0008150; GO:0005618; GO:0005515; GO:0005829; GO:0009056; GO:0009987; GO:0005886; GO:0000003; GO:0009791; GO:0009790; GO:0009536	molecular_function; cellular_component; biological_process; biological_process; biological_process; biological_process; cellular_component; molecular_function; cellular_component; biological_process; biological_process; cellular_component; biological_process; biological_process; biological_process; cellular_component; molecular_function; cellular_component; biological_process; biological_process;…	catalytic activity; cellular_component; metabolic process; response to stress; response to abiotic stimulus; biological_process; cell wall; protein binding; cytosol; catabolic process; cellular process; plasma membrane; reproduction; post-embryonic development; embryo development; plastid; catalytic activity; cellular_component; metabolic process; response to stress; response to abiotic stimulus;…	TAIR:AT1G07890; TAIR:AT1G07890; TAIR:AT1G07890; TAIR:AT1G07890; TAIR:AT1G07890; TAIR:AT1G07890; TAIR:AT1G07890; TAIR:AT1G07890; TAIR:AT1G07890; TAIR:AT1G07890; TAIR:AT1G07890; TAIR:AT1G07890; TAIR:AT1G07890; TAIR:AT1G07890; TAIR:AT1G07890; TAIR:AT1G07890; TAIR:AT1G07890; TAIR:AT1G07890; TAIR:AT1G07890; TAIR:AT1G07890; TAIR:AT1G07890; TAIR:AT1G07890; TAIR:AT1G07890; TAIR:AT1G07890; TAIR:AT1G07890;…	PF00141.16	peroxidase	Family	N/A	N/A	N/A	Q10N21	4332474;	NP_001049769.1;	osa:4332474;	LOC_Os03g17690	NA	NA	NA	NA	NA	NA	NA	NA
XLOC_025188	XLOC_025188	LOC_Os03g19010	Chr3:10647658-10650673	0.755407	3.60486	2.25462	2.3048	0.02635	0.459431	no	peroxisomal biogenesis factor 11, putative, expressed	GO:0016043; GO:0009987; GO:0003674; GO:0016020; GO:0005777; GO:0005515	biological_process; biological_process; molecular_function; cellular_component; cellular_component; molecular_function	cellular component organization; cellular process; molecular_function; membrane; peroxisome; protein binding	TAIR:AT1G47750; TAIR:AT1G47750; TAIR:AT1G47750; TAIR:AT1G47750; TAIR:AT1G47750; TAIR:AT1G47750	PF05648.7	PEX11	Family	N/A	N/A	N/A	Q10MN2	4332579;	NP_001049868.1;	osa:4332579;	LOC_Os03g19010	NA	NA	NA	NA	NA	NA	NA	NA
XLOC_025244	XLOC_025244	LOC_Os03g19990	Chr3:11266820-11270098	1.0645	13.3187	3.64521	4.42817	0.00135	0.09522	no	WD40-like Beta Propeller Repeat family protein, expressed	GO:0003674; GO:0016020; GO:0005773; GO:0005618; GO:0008150	molecular_function; cellular_component; cellular_component; cellular_component; biological_process	molecular_function; membrane; vacuole; cell wall; biological_process	TAIR:AT1G21680; TAIR:AT1G21680; TAIR:AT1G21680; TAIR:AT1G21680; TAIR:AT1G21680	PF07676.5	PD40	Repeat	IPR011659	WD40-like Beta Propeller	N/A	Q10MC3	4332648;	NP_001049934.1;	osa:4332648;	LOC_Os03g19990	NA	NA	NA	NA	NA	NA	NA	NA
XLOC_025308	XLOC_025308	LOC_Os03g21230	Chr3:12117810-12123134	0.997126	8.70249	3.12558	4.03281	0.001	0.0805175	no	leucine-rich repeat family protein, putative, expressed	GO:0005623; GO:0007165; GO:0016301; GO:0000166; GO:0006464	cellular_component; biological_process; molecular_function; molecular_function; biological_process	cell; signal transduction; kinase activity; nucleotide binding; protein modification process	TAIR:AT1G79620; TAIR:AT1G79620; TAIR:AT1G79620; TAIR:AT1G79620; TAIR:AT1G79620	PF07714.10	Pkinase_Tyr	Domain	N/A	N/A	N/A	Q10LZ2	NA	NA	NA	LOC_Os03g21230	NA	NA	NA	NA	NA	NA	NA	NA
XLOC_025379	XLOC_025379	LOC_Os03g22790	Chr3:13161768-13164014	9.58615	46.254	2.27056	3.50966	0.00045	0.0499057	yes	beta-amylase, putative, expressed	GO:0005488; GO:0008152; GO:0009058; GO:0005975; GO:0009987; GO:0009056; GO:0003824; GO:0016787	molecular_function; biological_process; biological_process; biological_process; biological_process; biological_process; molecular_function; molecular_function	binding; metabolic process; biosynthetic process; carbohydrate metabolic process; cellular process; catabolic process; catalytic activity; hydrolase activity	TAIR:AT5G18670; TAIR:AT5G18670; TAIR:AT5G18670; TAIR:AT5G18670; TAIR:AT5G18670; TAIR:AT5G18670; TAIR:AT5G18670; TAIR:AT5G18670	PF01373.10	Glyco_hydro_14	Domain	IPR001554	Glycoside hydrolase, family 14	Biological Process: polysaccharide catabolic process (GO:0000272), Molecular Function: beta-amylase activity (GO:0016161)	Q10LG9	4332844;	NP_001050116.2;	osa:4332844;	LOC_Os03g22790	NA	NA	NA	NA	NA	NA	NA	NA
XLOC_025449	XLOC_025449	LOC_Os03g24730	Chr3:14094379-14097988	0.995674	7.4153	2.89676	3.57447	0.00225	0.129516	no	expressed protein	GO:0005575; GO:0008150; GO:0005488	cellular_component; biological_process; molecular_function	cellular_component; biological_process; binding	TAIR:AT3G06210; TAIR:AT3G06210; TAIR:AT3G06210	NA	NA	NA	N/A	N/A	N/A	Q10L20	4332894;	NP_001050159.1;	osa:4332894;	LOC_Os03g24730	NA	NA	NA	NA	NA	NA	NA	NA
XLOC_025472	XLOC_025472	LOC_Os03g25150	Chr3:14381297-14387811	0.360015	5.33252	3.88869	3.63779	0.02075	0.407754	no	transposon protein, putative, unclassified, expressed	NA	NA	NA	NA	PF00067.15	p450	Domain	IPR001128	Cytochrome P450	Molecular Function: monooxygenase activity (GO:0004497), Molecular Function: iron ion binding (GO:0005506), Molecular Function: electron carrier activity (GO:0009055), Molecular Function: heme binding (GO:0020037)	Q10KX5	NA	NA	NA	LOC_Os03g25150	PWY-861	dhurrin biosynthesis	RXN-12240	-	GN7F-29995-MONOMER		GN7F-29995	LOC_Os07g19130.1
XLOC_025651	XLOC_025651	LOC_Os03g29190	Chr3:16590186-16595991	36.9831	345.111	3.22212	4.17956	0.0009	0.0758121	no	PDI, putative, expressed	GO:0009856; GO:0009605; GO:0007275; GO:0008152; GO:0016043; GO:0009653; GO:0030154; GO:0016049; GO:0003674; GO:0008150; GO:0005829; GO:0003824; GO:0009856; GO:0009605; GO:0007275; GO:0008152; GO:0016043; GO:0009653; GO:0030154; GO:0016049; GO:0003674; GO:0008150; GO:0005829; GO:0003824	biological_process; biological_process; biological_process; biological_process; biological_process; biological_process; biological_process; biological_process; molecular_function; biological_process; cellular_component; molecular_function; biological_process; biological_process; biological_process; biological_process; biological_process; biological_process; biological_process; biological_process;…	pollination; response to external stimulus; multicellular organismal development; metabolic process; cellular component organization; anatomical structure morphogenesis; cell differentiation; cell growth; molecular_function; biological_process; cytosol; catalytic activity; pollination; response to external stimulus; multicellular organismal development; metabolic process; cellular component organ…	TAIR:AT1G60420; TAIR:AT1G60420; TAIR:AT1G60420; TAIR:AT1G60420; TAIR:AT1G60420; TAIR:AT1G60420; TAIR:AT1G60420; TAIR:AT1G60420; TAIR:AT1G60420; TAIR:AT1G60420; TAIR:AT1G60420; TAIR:AT1G60420; TAIR:AT1G60420; TAIR:AT1G60420; TAIR:AT1G60420; TAIR:AT1G60420; TAIR:AT1G60420; TAIR:AT1G60420; TAIR:AT1G60420; TAIR:AT1G60420; TAIR:AT1G60420; TAIR:AT1G60420; TAIR:AT1G60420; TAIR:AT1G60420	PF00578.14	AhpC-TSA	Domain	IPR012336	Thioredoxin-like fold	N/A	Q7Y0E8	4333075;	NP_001050329.1;	osa:4333075;	LOC_Os03g29190	NA	NA	NA	NA	NA	NA	NA	NA
XLOC_025737	XLOC_025737	LOC_Os03g31150	Chr3:17738065-17741592	1.75905	9.94136	2.49865	3.34291	0.00345	0.163097	no	expressed protein	GO:0003674; GO:0008150; GO:0003674; GO:0008150; GO:0003674; GO:0008150	molecular_function; biological_process; molecular_function; biological_process; molecular_function; biological_process	molecular_function; biological_process; molecular_function; biological_process; molecular_function; biological_process	TAIR:AT2G31890; TAIR:AT2G31890; TAIR:AT2G31890; TAIR:AT2G31890; TAIR:AT2G31890; TAIR:AT2G31890	PF08373.3	RAP	Domain	IPR013584	RAP domain	N/A	Q84MH1	NA	NA	NA	LOC_Os03g31150	NA	NA	NA	NA	NA	NA	NA	NA
XLOC_026175	XLOC_026175	LOC_Os03g42600	Chr3:23715171-23715759	3.72598	32.1837	3.11064	3.50403	0.0066	0.222524	no	expressed protein	NA	NA	NA	NA	NA	NA	NA	N/A	N/A	N/A	Q75LF9	4333487;	NP_001050690.1;	osa:4333487;	LOC_Os03g42600	NA	NA	NA	NA	NA	NA	NA	NA
XLOC_026299	XLOC_026299	LOC_Os03g45390,LOC_Os03g45400	Chr3:25624174-25631164	4.02323	16.3108	2.0194	2.7832	0.0096	0.273326	no	glucan endo-1,3-beta-glucosidase precursor, putative, expressed	GO:0008152; GO:0005575; GO:0003824; GO:0016020; GO:0016787; GO:0005488; GO:0005975; GO:0005886	biological_process; cellular_component; molecular_function; cellular_component; molecular_function; molecular_function; biological_process; cellular_component	metabolic process; cellular_component; catalytic activity; membrane; hydrolase activity; binding; carbohydrate metabolic process; plasma membrane	TAIR:AT1G64760; TAIR:AT1G64760; TAIR:AT1G64760; TAIR:AT1G64760; TAIR:AT1G64760; TAIR:AT1G64760; TAIR:AT1G64760; TAIR:AT1G64760	PF00332.11	Glyco_hydro_17	Domain	IPR017853	Glycoside hydrolase, catalytic core	N/A	Q7Y090	4333617;	NP_001050810.1;	osa:4333617;	LOC_Os03g45390	NA	NA	NA	NA	NA	NA	NA	NA
XLOC_026331	XLOC_026331	LOC_Os03g46200	Chr3:26119967-26121852	1.61228	12.2197	2.92203	2.94037	0.0173	0.373539	no	acetyltransferase, GNAT family, putative, expressed	GO:0005575; GO:0008152; GO:0016740; GO:0009719	cellular_component; biological_process; molecular_function; biological_process	cellular_component; metabolic process; transferase activity; response to endogenous stimulus	TAIR:AT2G32020; TAIR:AT2G32020; TAIR:AT2G32020; TAIR:AT2G32020	PF00583.17	Acetyltransf_1	Family	IPR000182	GCN5-related N-acetyltransferase	Molecular Function: N-acetyltransferase activity (GO:0008080), Biological Process: metabolic process (GO:0008152)	Q75GC2	4333655;	NP_001050839.1;	osa:4333655;	LOC_Os03g46200	GLUTORN-PWY	ornithine biosynthesis	N-ACETYLTRANSFER-RXN	EC-2.3.1.1	GN7F-32821-MONOMER	amino-acid <i>N-</i>acetyltransferase	GN7F-32821	LOC_Os03g58030.1
XLOC_026481	XLOC_026481	LOC_Os03g49350	Chr3:28089981-28106119	0.779194	6.39	3.03576	3.58125	0.01035	0.284867	no	lipozygenase protein, putative, expressed	GO:0003824; GO:0009791; GO:0005488; GO:0008152; GO:0007275; GO:0009536	molecular_function; biological_process; molecular_function; biological_process; biological_process; cellular_component	catalytic activity; post-embryonic development; binding; metabolic process; multicellular organismal development; plastid	TAIR:AT3G22400; TAIR:AT3G22400; TAIR:AT3G22400; TAIR:AT3G22400; TAIR:AT3G22400; TAIR:AT3G22400	PF00305.12	Lipoxygenase	Domain	IPR001246	Lipoxygenase, plant	Molecular Function: iron ion binding (GO:0005506), Molecular Function: lipoxygenase activity (GO:0016165), Biological Process: oxidation reduction (GO:0055114)	Q7G794	4333821;	NP_001050993.1;	osa:4333821;	LOC_Os03g49350	NA	NA	NA	NA	NA	NA	NA	NA
XLOC_026485	XLOC_026485	LOC_Os03g49440	Chr3:28143096-28146332	10.9855	133.278	3.60077	4.7363	5e-05	0.0117035	yes	phosphatase, putative, expressed	GO:0008152; GO:0016787; GO:0003824; GO:0008152; GO:0016787; GO:0003824	biological_process; molecular_function; molecular_function; biological_process; molecular_function; molecular_function	metabolic process; hydrolase activity; catalytic activity; metabolic process; hydrolase activity; catalytic activity	TAIR:AT2G32150; TAIR:AT2G32150; TAIR:AT2G32150; TAIR:AT2G32150; TAIR:AT2G32150; TAIR:AT2G32150	NA	NA	NA	N/A	N/A	N/A	Q53RB5	4333827;	NP_001050999.1;	osa:4333827;	LOC_Os03g49440	NA	NA	NA	NA	NA	NA	NA	NA
XLOC_026727	XLOC_026727	LOC_Os03g55010	Chr3:31281993-31284676	1.60833	20.8557	3.69681	4.50809	0.0014	0.0973193	no	UDP-glucoronosyl and UDP-glucosyl transferase domain containing protein, expressed	GO:0005575; GO:0016740; GO:0008152	cellular_component; molecular_function; biological_process	cellular_component; transferase activity; metabolic process	TAIR:AT3G02100; TAIR:AT3G02100; TAIR:AT3G02100	PF00201.11	UDPGT	Family	N/A	N/A	N/A	Q9AUU9	NA	NA	NA	LOC_Os03g55010	PWY-6949	DIBOA-glucoside biosynthesis	RXN-7021	EC-2.4.1.202	GN7F-23517-MONOMER	2,4-dihydroxy-7-methoxy-2<i>H-</i>1,4-benzoxazin-3(4<i>H</i>)-one 2 -<small>D</small>-glucosyltransferase	GN7F-23517	LOC_Os10g18530.1
XLOC_026731	XLOC_026731	LOC_Os03g55070	Chr3:31315804-31318395	6.81632	33.988	2.31796	3.55612	0.00075	0.0664573	no	UDP-glucose 6-dehydrogenase, putative, expressed	GO:0003824; GO:0005634; GO:0008152; GO:0000166; GO:0005488; GO:0005618; GO:0005829; GO:0003824; GO:0005634; GO:0008152; GO:0000166; GO:0005488; GO:0005618; GO:0005829	molecular_function; cellular_component; biological_process; molecular_function; molecular_function; cellular_component; cellular_component; molecular_function; cellular_component; biological_process; molecular_function; molecular_function; cellular_component; cellular_component	catalytic activity; nucleus; metabolic process; nucleotide binding; binding; cell wall; cytosol; catalytic activity; nucleus; metabolic process; nucleotide binding; binding; cell wall; cytosol	TAIR:AT5G15490; TAIR:AT5G15490; TAIR:AT5G15490; TAIR:AT5G15490; TAIR:AT5G15490; TAIR:AT5G15490; TAIR:AT5G15490; TAIR:AT5G15490; TAIR:AT5G15490; TAIR:AT5G15490; TAIR:AT5G15490; TAIR:AT5G15490; TAIR:AT5G15490; TAIR:AT5G15490	PF00984.12	UDPG_MGDP_dh	Domain	N/A	N/A	N/A	Q9AUV6;; Q10CK6	4334169;	NP_001051328.1;	osa:4334169;	LOC_Os03g55070	COLANSYN-PWY	colanic acid building blocks biosynthesis	PWY-7346	-	GN7F-27596-MONOMER		GN7F-27596	LOC_Os03g31210.1
XLOC_026739	XLOC_026739	LOC_Os03g55164	Chr3:31391389-31399050	2.00022	12.7521	2.67251	3.31668	0.00575	0.208482	no	WRKY4, expressed	GO:0003674; GO:0008150; GO:0009536; GO:0003677; GO:0009058; GO:0006139; GO:0003700	molecular_function; biological_process; cellular_component; molecular_function; biological_process; biological_process; molecular_function	molecular_function; biological_process; plastid; DNA binding; biosynthetic process; nucleobase, nucleoside, nucleotide and nucleic acid metabolic process; sequence-specific DNA binding transcription factor activity	TAIR:AT3G29185; TAIR:AT3G29185; TAIR:AT3G29185; TAIR:AT1G13960; TAIR:AT1G13960; TAIR:AT1G13960; TAIR:AT1G13960	PF03106.8	WRKY	Domain	IPR003657	DNA-binding WRKY	Molecular Function: transcription factor activity (GO:0003700), Molecular Function: sequence-specific DNA binding (GO:0043565), Biological Process: regulation of transcription (GO:0045449)	Q7XAA5	4334178;	NP_001051337.1;	osa:4334178;	LOC_Os03g55164	NA	NA	NA	NA	NA	NA	NA	NA
XLOC_026769	XLOC_026769	LOC_Os03g55720	Chr3:31725101-31732265	35.1905	143.485	2.02764	2.72456	0.00835	0.254298	no	cytochrome b6f complex subunit, putative, expressed	GO:0003824; GO:0016020; GO:0009536; GO:0009579; GO:0008152; GO:0003824; GO:0016020; GO:0009536; GO:0009579; GO:0008152	molecular_function; cellular_component; cellular_component; cellular_component; biological_process; molecular_function; cellular_component; cellular_component; cellular_component; biological_process	catalytic activity; membrane; plastid; thylakoid; metabolic process; catalytic activity; membrane; plastid; thylakoid; metabolic process	TAIR:AT2G26500; TAIR:AT2G26500; TAIR:AT2G26500; TAIR:AT2G26500; TAIR:AT2G26500; TAIR:AT2G26500; TAIR:AT2G26500; TAIR:AT2G26500; TAIR:AT2G26500; TAIR:AT2G26500	PF08041.4	PetM	Family	N/A	N/A	N/A	Q7Y0C9	4334225;	NP_001051378.1;	osa:4334225;	LOC_Os03g55720	NA	NA	NA	NA	NA	NA	NA	NA
XLOC_026781	XLOC_026781	LOC_Os03g55980,LOC_Os03g55990	Chr3:31867210-31872565	1.96582	8.2058	2.06152	2.19349	0.031	0.49178	no	expressed protein	GO:0003674; GO:0008150; GO:0005886	molecular_function; biological_process; cellular_component	molecular_function; biological_process; plasma membrane	TAIR:AT1G10140; TAIR:AT1G10140; TAIR:AT1G10140	NA	NA	NA	IPR016972	Uncharacterised conserved protein UCP031279	N/A	Q75KB0	4334252;	NP_001051398.1;	osa:4334252;	LOC_Os03g55980	NA	NA	NA	NA	NA	NA	NA	NA
XLOC_026844	XLOC_026844	LOC_Os03g57310	Chr3:32694533-32696110	0.697435	3.69842	2.40678	2.35239	0.0426	0.572636	no	syntaxin, putative, expressed	GO:0005515; GO:0009607; GO:0008219; GO:0016043; GO:0009987; GO:0006950; GO:0007165; GO:0005886; GO:0006810; GO:0005575; GO:0009719; GO:0016020	molecular_function; biological_process; biological_process; biological_process; biological_process; biological_process; biological_process; cellular_component; biological_process; cellular_component; biological_process; cellular_component	protein binding; response to biotic stimulus; cell death; cellular component organization; cellular process; response to stress; signal transduction; plasma membrane; transport; cellular_component; response to endogenous stimulus; membrane	TAIR:AT3G11820; TAIR:AT3G11820; TAIR:AT3G11820; TAIR:AT3G11820; TAIR:AT3G11820; TAIR:AT3G11820; TAIR:AT3G11820; TAIR:AT3G11820; TAIR:AT3G11820; TAIR:AT3G11820; TAIR:AT3G11820; TAIR:AT3G11820	PF00804.18	Syntaxin	Domain	IPR000727	Target SNARE coiled-coil domain	N/A	Q6F3B4	4334356;	NP_001051494.1;	osa:4334356;	LOC_Os03g57310	NA	NA	NA	NA	NA	NA	NA	NA
XLOC_026911	XLOC_026911	LOC_Os03g58790	Chr3:33482033-33484155	2.44422	16.8193	2.78267	3.81451	0.00075	0.0664573	no	ATPase, putative, expressed	GO:0005783; GO:0008152; GO:0000166; GO:0009719; GO:0009056; GO:0006139; GO:0016787	cellular_component; biological_process; molecular_function; biological_process; biological_process; biological_process; molecular_function	endoplasmic reticulum; metabolic process; nucleotide binding; response to endogenous stimulus; catabolic process; nucleobase, nucleoside, nucleotide and nucleic acid metabolic process; hydrolase activity	TAIR:AT3G28580; TAIR:AT3G28580; TAIR:AT3G28580; TAIR:AT3G28580; TAIR:AT3G28580; TAIR:AT3G28580; TAIR:AT3G28580	PF00004.22	AAA	Family	IPR003959	ATPase, AAA-type, core	Molecular Function: ATP binding (GO:0005524)	Q84SZ7	4334467;	NP_001051601.1;	osa:4334467;	LOC_Os03g58790	NA	NA	NA	NA	NA	NA	NA	NA
XLOC_026917	XLOC_026917	LOC_Os03g58980	Chr3:33586464-33587364	2.63669	13.5888	2.36562	2.70093	0.01765	0.377399	no	Cupin domain containing protein, expressed	GO:0005623; GO:0005576; GO:0003674; GO:0005488	cellular_component; cellular_component; molecular_function; molecular_function	cell; extracellular region; molecular_function; binding	TAIR:AT1G18970; TAIR:AT1G18970; TAIR:AT1G18970; TAIR:AT1G18970	PF00190.15	Cupin_1	Domain	IPR019780	Germin, manganese binding site	Molecular Function: manganese ion binding (GO:0030145), Cellular Component: apoplast (GO:0048046)	Q10BU2	4334487;	NP_001051620.1;	osa:4334487;	LOC_Os03g58980	NA	NA	NA	NA	NA	NA	NA	NA
XLOC_026980	XLOC_026980	LOC_Os03g60080	Chr3:34165909-34173336	14.025	89.0251	2.66621	1.85752	0.0456	0.587279	no	NAC domain-containing protein 67, putative, expressed	GO:0009058; GO:0006139; GO:0007275; GO:0003700; GO:0006950; GO:0009536	biological_process; biological_process; biological_process; molecular_function; biological_process; cellular_component	biosynthetic process; nucleobase, nucleoside, nucleotide and nucleic acid metabolic process; multicellular organismal development; sequence-specific DNA binding transcription factor activity; response to stress; plastid	TAIR:AT5G63790; TAIR:AT5G63790; TAIR:AT5G63790; TAIR:AT5G63790; TAIR:AT5G63790; TAIR:AT5G63790	PF02365.8	NAM	Family	IPR003441	No apical meristem (NAM) protein	Molecular Function: DNA binding (GO:0003677), Biological Process: regulation of transcription (GO:0045449)	Q75HE5	4334553;	NP_001051682.1;	osa:4334553;	LOC_Os03g60080	NA	NA	NA	NA	NA	NA	NA	NA
XLOC_026981	XLOC_026981	LOC_Os03g60100	Chr3:34174772-34176702	12.0143	51.8986	2.11094	3.10763	0.00515	0.19642	no	50S ribosomal protein L17, putative, expressed	GO:0005840; GO:0006412; GO:0005198; GO:0009536	cellular_component; biological_process; molecular_function; cellular_component	ribosome; translation; structural molecule activity; plastid	TAIR:AT3G54210; TAIR:AT3G54210; TAIR:AT3G54210; TAIR:AT3G54210	PF01196.12	Ribosomal_L17	Family	N/A	N/A	N/A	Q75GR6	4334555;	NP_001051684.1;	osa:4334555;	LOC_Os03g60100	NA	NA	NA	NA	NA	NA	NA	NA
XLOC_026988	XLOC_026988	LOC_Os03g60260	Chr3:34271315-34273067	2.35261	12.0355	2.35496	2.99696	0.0081	0.248977	no	ANT1, putative, expressed	GO:0016020; GO:0005215; GO:0006810; GO:0009607; GO:0009987	cellular_component; molecular_function; biological_process; biological_process; biological_process	membrane; transporter activity; transport; response to biotic stimulus; cellular process	TAIR:AT3G11900; TAIR:AT3G11900; TAIR:AT3G11900; TAIR:AT3G11900; TAIR:AT3G11900	PF01490.11	Aa_trans	Family	IPR013057	Amino acid transporter, transmembrane	N/A	Q84TX7	4334572;	NP_001051700.1;	osa:4334572;	LOC_Os03g60260	NA	NA	NA	NA	NA	NA	NA	NA
XLOC_027032	XLOC_027032	LOC_Os03g61260	Chr3:34785472-34787514	5.46628	38.1358	2.80251	3.81749	0.00075	0.0664573	no	ribosomal L18p/L5e family protein, putative, expressed	GO:0005840; GO:0009987; GO:0006412; GO:0009536; GO:0005198; GO:0005840; GO:0009987; GO:0006412; GO:0009536; GO:0005198; GO:0005840; GO:0009987; GO:0006412; GO:0009536; GO:0005198	cellular_component; biological_process; biological_process; cellular_component; molecular_function; cellular_component; biological_process; biological_process; cellular_component; molecular_function; cellular_component; biological_process; biological_process; cellular_component; molecular_function	ribosome; cellular process; translation; plastid; structural molecule activity; ribosome; cellular process; translation; plastid; structural molecule activity; ribosome; cellular process; translation; plastid; structural molecule activity	TAIR:AT1G48350; TAIR:AT1G48350; TAIR:AT1G48350; TAIR:AT1G48350; TAIR:AT1G48350; TAIR:AT1G48350; TAIR:AT1G48350; TAIR:AT1G48350; TAIR:AT1G48350; TAIR:AT1G48350; TAIR:AT1G48350; TAIR:AT1G48350; TAIR:AT1G48350; TAIR:AT1G48350; TAIR:AT1G48350	PF00861.15	Ribosomal_L18p	Family	N/A	N/A	N/A	Q10B70;; Q8SAY0;; Q10B71	4334651;	NP_001051775.1;	osa:4334651;	LOC_Os03g61260	NA	NA	NA	NA	NA	NA	NA	NA
XLOC_027104	XLOC_027104	LOC_Os03g62690	Chr3:35474091-35479977	0.222371	1.72396	2.95469	2.62174	0.01605	0.357342	no	pentatricopeptide, putative, expressed	GO:0003674; GO:0005575; GO:0008150; GO:0003674; GO:0005575; GO:0008150	molecular_function; cellular_component; biological_process; molecular_function; cellular_component; biological_process	molecular_function; cellular_component; biological_process; molecular_function; cellular_component; biological_process	TAIR:AT2G27610; TAIR:AT2G27610; TAIR:AT2G27610; TAIR:AT2G27610; TAIR:AT2G27610; TAIR:AT2G27610	PF01535.13	PPR	Family	IPR002885	Pentatricopeptide repeat	N/A	Q10AR1	NA	NA	NA	LOC_Os03g62690	NA	NA	NA	NA	NA	NA	NA	NA
XLOC_027129	XLOC_027129	LOC_Os03g63310	Chr3:35777908-35781336	0.908851	12.4134	3.77171	4.29293	0.0031	0.155294	no	cytochrome P450 71E1, putative, expressed	GO:0003674; GO:0005488; GO:0003824; GO:0008152; GO:0019825	molecular_function; molecular_function; molecular_function; biological_process; molecular_function	molecular_function; binding; catalytic activity; metabolic process; oxygen binding	TAIR:AT3G26330; TAIR:AT3G26330; TAIR:AT3G26330; TAIR:AT3G26330; TAIR:AT3G26330	PF00067.15	p450	Domain	N/A	N/A	N/A	Q84JR8	4334792;	NP_001051904.1;	osa:4334792;	LOC_Os03g63310	PWY-5060	luteolin biosynthesis	RXN-7651	EC-1.14.13.21	GN7F-20371-MONOMER		GN7F-20371	LOC_Os09g08920.1
XLOC_027148	XLOC_027148	LOC_Os03g63700	Chr3:35973549-35974651	3.12494	15.7162	2.33036	2.89454	0.0085	0.256503	no	AIG2-like family domain containing protein, expressed	GO:0003674; GO:0009628	molecular_function; biological_process	molecular_function; response to abiotic stimulus	TAIR:AT3G02910; TAIR:AT3G02910	PF06094.5	AIG2	Family	IPR013024	Butirosin biosynthesis, BtrG-like	N/A	Q84T74	4334822;	NP_001051934.1;	osa:4334822;	LOC_Os03g63700	PWY-4041	&gamma;-glutamyl cycle	GAMMA-GLUTAMYLCYCLOTRANSFERASE-RXN	EC-2.3.2.4	GN7F-31386-MONOMER	&gamma;-glutamylcyclotransferase	GN7F-31386	LOC_Os03g63700.1
XLOC_027160	XLOC_027160	LOC_Os03g63900	Chr3:36103512-36105068	2.00536	11.628	2.53566	3.02458	0.0118	0.301667	no	1-aminocyclopropane-1-carboxylate oxidase 2, putative, expressed	GO:0005575; GO:0007275; GO:0003824; GO:0009058; GO:0009987; GO:0019748; GO:0008152	cellular_component; biological_process; molecular_function; biological_process; biological_process; biological_process; biological_process	cellular_component; multicellular organismal development; catalytic activity; biosynthetic process; cellular process; secondary metabolic process; metabolic process	TAIR:AT1G17020; TAIR:AT1G17020; TAIR:AT1G17020; TAIR:AT1G17020; TAIR:AT1G17020; TAIR:AT1G17020; TAIR:AT1G17020	PF03171.13	2OG-FeII_Oxy	Domain	IPR005123	Oxoglutarate/iron-dependent oxygenase	Molecular Function: oxidoreductase activity (GO:0016491)	Q75IP9	4334835;	NP_001051945.1;	osa:4334835;	LOC_Os03g63900	NA	NA	NA	NA	NA	NA	NA	NA
XLOC_027270	XLOC_027270	LOC_Os03g03034	Chr3:1235372-1245060	1.6108	33.6079	4.38295	4.62491	0.0006	0.0580256	no	flavonol synthase/flavanone 3-hydroxylase, putative, expressed	GO:0005575; GO:0009607; GO:0009058; GO:0009987; GO:0019748; GO:0003824; GO:0008152; GO:0005575; GO:0009607; GO:0009058; GO:0009987; GO:0019748; GO:0003824; GO:0008152; GO:0005575; GO:0009607; GO:0009058; GO:0009987; GO:0019748; GO:0003824; GO:0008152; GO:0005575; GO:0009607; GO:0009058; GO:0009987; GO:0019748; GO:0003824; GO:0008152; GO:0005575; GO:0009607; GO:0009058; GO:0009987; GO:0019748; GO:…	cellular_component; biological_process; biological_process; biological_process; biological_process; molecular_function; biological_process; cellular_component; biological_process; biological_process; biological_process; biological_process; molecular_function; biological_process; cellular_component; biological_process; biological_process; biological_process; biological_process; molecular_function;…	cellular_component; response to biotic stimulus; biosynthetic process; cellular process; secondary metabolic process; catalytic activity; metabolic process; cellular_component; response to biotic stimulus; biosynthetic process; cellular process; secondary metabolic process; catalytic activity; metabolic process; cellular_component; response to biotic stimulus; biosynthetic process; cellular proce…	TAIR:AT5G24530; TAIR:AT5G24530; TAIR:AT5G24530; TAIR:AT5G24530; TAIR:AT5G24530; TAIR:AT5G24530; TAIR:AT5G24530; TAIR:AT5G24530; TAIR:AT5G24530; TAIR:AT5G24530; TAIR:AT5G24530; TAIR:AT5G24530; TAIR:AT5G24530; TAIR:AT5G24530; TAIR:AT5G24530; TAIR:AT5G24530; TAIR:AT5G24530; TAIR:AT5G24530; TAIR:AT5G24530; TAIR:AT5G24530; TAIR:AT5G24530; TAIR:AT5G24530; TAIR:AT5G24530; TAIR:AT5G24530; TAIR:AT5G24530;…	PF03171.13	2OG-FeII_Oxy	Domain	N/A	N/A	N/A	Q10SI1;; Q10SI0;; Q10SI2	4331443;	NP_001048799.1;	osa:4331443;	LOC_Os03g03034	NA	NA	NA	NA	NA	NA	NA	NA
XLOC_027283	XLOC_027283	LOC_Os03g03360	Chr3:1430638-1435347	5.8119	23.285	2.00232	2.99535	0.00335	0.159797	no	ribosomal protein L5, putative, expressed	GO:0016020; GO:0005840; GO:0005829; GO:0006412; GO:0005198; GO:0009536	cellular_component; cellular_component; cellular_component; biological_process; molecular_function; cellular_component	membrane; ribosome; cytosol; translation; structural molecule activity; plastid	TAIR:AT4G01310; TAIR:AT4G01310; TAIR:AT4G01310; TAIR:AT4G01310; TAIR:AT4G01310; TAIR:AT4G01310	PF00281.12	Ribosomal_L5	Domain	IPR002132	Ribosomal protein L5	Molecular Function: structural constituent of ribosome (GO:0003735), Cellular Component: intracellular (GO:0005622), Cellular Component: ribosome (GO:0005840), Biological Process: translation (GO:0006412)	Q9ZST0;; Q10SE8	4331459;	NP_001048814.1;	osa:4331459;	LOC_Os03g03360	NA	NA	NA	NA	NA	NA	NA	NA
XLOC_027388	XLOC_027388	LOC_Os03g05620	Chr3:2807554-2809678	10.1038	91.9403	3.1858	4.81673	5e-05	0.0117035	yes	inorganic phosphate transporter, putative, expressed	GO:0006810; GO:0016020; GO:0009987; GO:0005215; GO:0005886	biological_process; cellular_component; biological_process; molecular_function; cellular_component	transport; membrane; cellular process; transporter activity; plasma membrane	TAIR:AT3G54700; TAIR:AT3G54700; TAIR:AT3G54700; TAIR:AT3G54700; TAIR:AT3G54700	PF00083.17	Sugar_tr	Family	N/A	N/A	N/A	Q8H6H4	4331635;	NP_001048977.2;	osa:4331635;	LOC_Os03g05620	NA	NA	NA	NA	NA	NA	NA	NA
XLOC_027528	XLOC_027528	LOC_Os03g08470	Chr3:4348669-4350541	0.663288	21.1036	4.99171	5.10825	0.0034	0.161599	no	AP2 domain containing protein, expressed	GO:0003677; GO:0005634; GO:0009058; GO:0006139; GO:0003700; GO:0003677; GO:0005634; GO:0009058; GO:0006139; GO:0003700; GO:0003677; GO:0005634; GO:0009058; GO:0006139; GO:0003700	molecular_function; cellular_component; biological_process; biological_process; molecular_function; molecular_function; cellular_component; biological_process; biological_process; molecular_function; molecular_function; cellular_component; biological_process; biological_process; molecular_function	DNA binding; nucleus; biosynthetic process; nucleobase, nucleoside, nucleotide and nucleic acid metabolic process; sequence-specific DNA binding transcription factor activity; DNA binding; nucleus; biosynthetic process; nucleobase, nucleoside, nucleotide and nucleic acid metabolic process; sequence-specific DNA binding transcription factor activity; DNA binding; nucleus; biosynthetic process; nuc…	TAIR:AT1G53910; TAIR:AT1G53910; TAIR:AT1G53910; TAIR:AT1G53910; TAIR:AT1G53910; TAIR:AT1G53910; TAIR:AT1G53910; TAIR:AT1G53910; TAIR:AT1G53910; TAIR:AT1G53910; TAIR:AT1G53910; TAIR:AT1G53910; TAIR:AT1G53910; TAIR:AT1G53910; TAIR:AT1G53910	PF00847.13	AP2	Domain	IPR001471	Pathogenesis-related transcriptional factor/ERF, DNA-binding	Molecular Function: transcription factor activity (GO:0003700), Biological Process: regulation of transcription, DNA-dependent (GO:0006355)	Q10QU5	4331845;	NP_001049177.1;	osa:4331845;	LOC_Os03g08470	NA	NA	NA	NA	NA	NA	NA	NA
XLOC_027530	XLOC_027530	LOC_Os03g08490	Chr3:4367116-4368399	2.77641	17.7837	2.67927	3.38096	0.0047	0.191107	no	AP2 domain containing protein, expressed	GO:0003677; GO:0005634; GO:0009719; GO:0007165; GO:0009058; GO:0006139; GO:0006950; GO:0008219; GO:0005737; GO:0005515; GO:0009607; GO:0005886; GO:0003700	molecular_function; cellular_component; biological_process; biological_process; biological_process; biological_process; biological_process; biological_process; cellular_component; molecular_function; biological_process; cellular_component; molecular_function	DNA binding; nucleus; response to endogenous stimulus; signal transduction; biosynthetic process; nucleobase, nucleoside, nucleotide and nucleic acid metabolic process; response to stress; cell death; cytoplasm; protein binding; response to biotic stimulus; plasma membrane; sequence-specific DNA binding transcription factor activity	TAIR:AT3G16770; TAIR:AT3G16770; TAIR:AT3G16770; TAIR:AT3G16770; TAIR:AT3G16770; TAIR:AT3G16770; TAIR:AT3G16770; TAIR:AT3G16770; TAIR:AT3G16770; TAIR:AT3G16770; TAIR:AT3G16770; TAIR:AT3G16770; TAIR:AT3G16770	PF00847.13	AP2	Domain	N/A	N/A	N/A	Q94HF5	NA	NA	NA	LOC_Os03g08490	NA	NA	NA	NA	NA	NA	NA	NA
XLOC_027531	XLOC_027531	LOC_Os03g08500	Chr3:4372114-4373460	14.2086	60.1537	2.08189	3.24444	0.00095	0.0784009	no	AP2 domain containing protein, expressed	GO:0008152; GO:0003677; GO:0005634; GO:0009058; GO:0006139; GO:0003700; GO:0006950; GO:0008152; GO:0003677; GO:0005634; GO:0009058; GO:0006139; GO:0003700; GO:0006950	biological_process; molecular_function; cellular_component; biological_process; biological_process; molecular_function; biological_process; biological_process; molecular_function; cellular_component; biological_process; biological_process; molecular_function; biological_process	metabolic process; DNA binding; nucleus; biosynthetic process; nucleobase, nucleoside, nucleotide and nucleic acid metabolic process; sequence-specific DNA binding transcription factor activity; response to stress; metabolic process; DNA binding; nucleus; biosynthetic process; nucleobase, nucleoside, nucleotide and nucleic acid metabolic process; sequence-specific DNA binding transcription factor…	TAIR:AT3G14230; TAIR:AT3G14230; TAIR:AT3G14230; TAIR:AT3G14230; TAIR:AT3G14230; TAIR:AT3G14230; TAIR:AT3G14230; TAIR:AT3G14230; TAIR:AT3G14230; TAIR:AT3G14230; TAIR:AT3G14230; TAIR:AT3G14230; TAIR:AT3G14230; TAIR:AT3G14230	PF00847.13	AP2	Domain	N/A	N/A	N/A	Q10QU2	NA	NA	NA	LOC_Os03g08500	NA	NA	NA	NA	NA	NA	NA	NA
XLOC_027550	XLOC_027550	LOC_Os03g08999	Chr3:4667195-4680027	9.52741	44.0969	2.21052	3.36561	0.0014	0.0973193	no	dehydrogenase, putative, expressed	GO:0005488; GO:0008152; GO:0003824	molecular_function; biological_process; molecular_function	binding; metabolic process; catalytic activity	TAIR:AT5G42250; TAIR:AT5G42250; TAIR:AT5G42250	PF00107.19	ADH_zinc_N	Family	IPR013149	Alcohol dehydrogenase, C-terminal	Molecular Function: zinc ion binding (GO:0008270), Molecular Function: oxidoreductase activity (GO:0016491), Biological Process: oxidation reduction (GO:0055114)	Q10QP0	4331893;	NP_001049222.1;	osa:4331893;	LOC_Os03g08999	NA	NA	NA	NA	NA	NA	NA	NA
XLOC_027551	XLOC_027551	LOC_Os03g09020	Chr3:4682031-4685283	0.535108	6.46098	3.59385	3.45953	0.0188	0.385922	no	dehydrogenase, putative, expressed	GO:0005575; GO:0005488; GO:0008152; GO:0003824	cellular_component; molecular_function; biological_process; molecular_function	cellular_component; binding; metabolic process; catalytic activity	TAIR:AT4G22110; TAIR:AT4G22110; TAIR:AT4G22110; TAIR:AT4G22110	PF08240.5	ADH_N	Domain	N/A	N/A	N/A	Q10QN7;; Q10QN8;; Q10QN9	4331894;	NP_001049223.1;	osa:4331894;	LOC_Os03g09020	NA	NA	NA	NA	NA	NA	NA	NA
XLOC_027552	XLOC_027552	LOC_Os03g09060	Chr3:4697208-4700186	2.31872	13.555	2.54743	3.16502	0.0059	0.210743	no	prenyltransferase, putative, expressed	GO:0006091; GO:0015979; GO:0016740; GO:0009058; GO:0009987; GO:0008152; GO:0009536	biological_process; biological_process; molecular_function; biological_process; biological_process; biological_process; cellular_component	generation of precursor metabolites and energy; photosynthesis; transferase activity; biosynthetic process; cellular process; metabolic process; plastid	TAIR:AT1G60600; TAIR:AT1G60600; TAIR:AT1G60600; TAIR:AT1G60600; TAIR:AT1G60600; TAIR:AT1G60600; TAIR:AT1G60600	PF01040.11	UbiA	Family	IPR000537	UbiA prenyltransferase	Molecular Function: prenyltransferase activity (GO:0004659), Cellular Component: integral to membrane (GO:0016021)	Q10QN3	4331897;	NP_001049226.1;	osa:4331897;	LOC_Os03g09060	NA	NA	NA	NA	NA	NA	NA	NA
XLOC_027881	XLOC_027881	LOC_Os03g16390	Chr3:9039562-9041499	1.76621	11.0155	2.64081	3.34576	0.00495	0.193583	no	avr9/Cf-9 rapidly elicited protein, putative, expressed	GO:0003674; GO:0008150	molecular_function; biological_process	molecular_function; biological_process	TAIR:AT3G23160; TAIR:AT3G23160	PF05003.5	DUF668	Family	N/A	N/A	N/A	Q84JV9	NA	NA	NA	LOC_Os03g16390	NA	NA	NA	NA	NA	NA	NA	NA
XLOC_027906	XLOC_027906	LOC_Os03g16950	Chr3:9421688-9422925	4.16286	98.9601	4.5712	6.03232	0.0001	0.0199623	yes	cysteine-rich repeat secretory protein 55 precursor, putative, expressed	GO:0005623; GO:0003674; GO:0009628	cellular_component; molecular_function; biological_process	cell; molecular_function; response to abiotic stimulus	TAIR:AT5G48540; TAIR:AT5G48540; TAIR:AT5G48540	PF01657.10	DUF26	Family	N/A	N/A	N/A	Q10N98	4332422;	NP_001049721.1;	osa:4332422;	LOC_Os03g16950	NA	NA	NA	NA	NA	NA	NA	NA
XLOC_027907	XLOC_027907	LOC_Os03g16960	Chr3:9425489-9426843	0.593328	8.05425	3.76285	3.53528	0.02125	0.411617	no	cysteine-rich repeat secretory protein 55 precursor, putative, expressed	GO:0005623; GO:0003674; GO:0009628	cellular_component; molecular_function; biological_process	cell; molecular_function; response to abiotic stimulus	TAIR:AT5G48540; TAIR:AT5G48540; TAIR:AT5G48540	PF01657.10	DUF26	Family	N/A	N/A	N/A	Q10N97	4332423;	NP_001049722.1;	osa:4332423;	LOC_Os03g16960	NA	NA	NA	NA	NA	NA	NA	NA
XLOC_027938	XLOC_027938	LOC_Os03g17700	Chr3:9847699-9850473	4.68754	21.8256	2.21911	3.11168	0.0057	0.207952	no	CGMC_MAPKCGMC_2_ERK.2 - CGMC includes CDA, MAPK, GSK3, and CLKC kinases, expressed	GO:0008152; GO:0009987; GO:0009719; GO:0007165; GO:0006950; GO:0009628; GO:0006464; GO:0007275; GO:0009908; GO:0008150; GO:0005515; GO:0016301; GO:0004871; GO:0009058; GO:0019748; GO:0009791; GO:0009607	biological_process; biological_process; biological_process; biological_process; biological_process; biological_process; biological_process; biological_process; biological_process; biological_process; molecular_function; molecular_function; molecular_function; biological_process; biological_process; biological_process; biological_process	metabolic process; cellular process; response to endogenous stimulus; signal transduction; response to stress; response to abiotic stimulus; protein modification process; multicellular organismal development; flower development; biological_process; protein binding; kinase activity; signal transducer activity; biosynthetic process; secondary metabolic process; post-embryonic development; response …	TAIR:AT3G45640; TAIR:AT3G45640; TAIR:AT3G45640; TAIR:AT3G45640; TAIR:AT3G45640; TAIR:AT3G45640; TAIR:AT3G45640; TAIR:AT3G45640; TAIR:AT3G45640; TAIR:AT3G45640; TAIR:AT3G45640; TAIR:AT3G45640; TAIR:AT3G45640; TAIR:AT3G45640; TAIR:AT3G45640; TAIR:AT3G45640; TAIR:AT3G45640	PF00069.18	Pkinase	Domain	IPR008351	JNK MAP kinase	Molecular Function: MAP kinase activity (GO:0004707), Molecular Function: ATP binding (GO:0005524), Biological Process: protein amino acid phosphorylation (GO:0006468)	Q10N20	4332475;	NP_001049770.1;	osa:4332475;	LOC_Os03g17700	NA	NA	NA	NA	NA	NA	NA	NA
XLOC_027944	XLOC_027944	LOC_Os03g17790	Chr3:9899757-9900400	4.8439	63.4489	3.71136	4.32963	0.00265	0.141888	no	OsRCI2-5 - Putative low temperature and salt responsive protein, expressed	GO:0005623; GO:0006950; GO:0009628; GO:0016020	cellular_component; biological_process; biological_process; cellular_component	cell; response to stress; response to abiotic stimulus; membrane	TAIR:AT2G38905; TAIR:AT2G38905; TAIR:AT2G38905; TAIR:AT2G38905	PF01679.10	UPF0057	Family	IPR000612	Uncharacterised protein family UPF0057	Cellular Component: integral to membrane (GO:0016021)	Q8H001	4332481;	NP_001049776.1;	osa:4332481;	LOC_Os03g17790	NA	NA	NA	NA	NA	NA	NA	NA
XLOC_027957	XLOC_027957	LOC_Os03g18130	Chr3:10116218-10124384	11.4538	347.161	4.9217	6.26061	5e-05	0.0117035	yes	asparagine synthetase, putative, expressed	GO:0003824; GO:0005575; GO:0009058; GO:0009987; GO:0005829; GO:0006950; GO:0009628; GO:0003824; GO:0005575; GO:0009058; GO:0009987; GO:0005829; GO:0006950; GO:0009628; GO:0003824; GO:0005575; GO:0009058; GO:0009987; GO:0005829; GO:0006950; GO:0009628; GO:0003824; GO:0005575; GO:0009058; GO:0009987; GO:0005829; GO:0006950; GO:0009628	molecular_function; cellular_component; biological_process; biological_process; cellular_component; biological_process; biological_process; molecular_function; cellular_component; biological_process; biological_process; cellular_component; biological_process; biological_process; molecular_function; cellular_component; biological_process; biological_process; cellular_component; biological_process;…	catalytic activity; cellular_component; biosynthetic process; cellular process; cytosol; response to stress; response to abiotic stimulus; catalytic activity; cellular_component; biosynthetic process; cellular process; cytosol; response to stress; response to abiotic stimulus; catalytic activity; cellular_component; biosynthetic process; cellular process; cytosol; response to stress; response to …	TAIR:AT5G65010; TAIR:AT5G65010; TAIR:AT5G65010; TAIR:AT5G65010; TAIR:AT5G65010; TAIR:AT5G65010; TAIR:AT5G65010; TAIR:AT5G65010; TAIR:AT5G65010; TAIR:AT5G65010; TAIR:AT5G65010; TAIR:AT5G65010; TAIR:AT5G65010; TAIR:AT5G65010; TAIR:AT5G65010; TAIR:AT5G65010; TAIR:AT5G65010; TAIR:AT5G65010; TAIR:AT5G65010; TAIR:AT5G65010; TAIR:AT5G65010; TAIR:AT5G65010; TAIR:AT5G65010; TAIR:AT5G65010; TAIR:AT5G65010;…	PF00733.14	Asn_synthase	Domain	IPR014729	Rossmann-like alpha/beta/alpha sandwich fold	N/A	Q10MX3	4332506;	NP_001049799.2;	osa:4332506;	LOC_Os03g18130	NA	NA	NA	NA	NA	NA	NA	NA
XLOC_027980	XLOC_027980	LOC_Os03g18600	Chr3:10418633-10419919	3.49786	26.1963	2.90482	3.86962	0.00145	0.0994877	no	cyclase/dehydrase family protein, putative, expressed	GO:0003674; GO:0009719; GO:0007165; GO:0005515; GO:0004872	molecular_function; biological_process; biological_process; molecular_function; molecular_function	molecular_function; response to endogenous stimulus; signal transduction; protein binding; receptor activity	TAIR:AT2G38310; TAIR:AT2G38310; TAIR:AT2G38310; TAIR:AT2G38310; TAIR:AT2G38310	PF10604.2	Polyketide_cyc2	Family	N/A	N/A	N/A	Q10MS2	4332548;	NP_001049838.1;	osa:4332548;	LOC_Os03g18600	NA	NA	NA	NA	NA	NA	NA	NA
XLOC_028028	XLOC_028028	LOC_Os03g19700	Chr3:11081553-11083185	0.671733	4.1905	2.64116	2.59921	0.03105	0.49178	no	plant protein of unknown function domain containing protein, expressed	GO:0003674; GO:0005575; GO:0008150	molecular_function; cellular_component; biological_process	molecular_function; cellular_component; biological_process	TAIR:AT3G50170; TAIR:AT3G50170; TAIR:AT3G50170	PF03140.8	DUF247	Family	N/A	N/A	N/A	Q10MF5	4332630;	NP_001049917.1;	osa:4332630;	LOC_Os03g19700	NA	NA	NA	NA	NA	NA	NA	NA
XLOC_028044	XLOC_028044	LOC_Os03g20090	Chr3:11326078-11328322	0.825915	4.5078	2.44836	2.54669	0.03855	0.548788	no	MYB family transcription factor, putative, expressed	GO:0003677; GO:0009058; GO:0006139; GO:0006950; GO:0009628; GO:0003700; GO:0009719	molecular_function; biological_process; biological_process; biological_process; biological_process; molecular_function; biological_process	DNA binding; biosynthetic process; nucleobase, nucleoside, nucleotide and nucleic acid metabolic process; response to stress; response to abiotic stimulus; sequence-specific DNA binding transcription factor activity; response to endogenous stimulus	TAIR:AT5G49620; TAIR:AT5G49620; TAIR:AT5G49620; TAIR:AT5G49620; TAIR:AT5G49620; TAIR:AT5G49620; TAIR:AT5G49620	PF00249.24	Myb_DNA-binding	Domain	N/A	N/A	N/A	Q10MB4	4332651;	NP_001049937.1;	osa:4332651;	LOC_Os03g20090	NA	NA	NA	NA	NA	NA	NA	NA
XLOC_028054	XLOC_028054	LOC_Os03g20420	Chr3:11549505-11558340	4.04251	20.4591	2.33942	3.50488	0.00105	0.0834009	no	alpha-N-arabinofuranosidase A, putative, expressed	GO:0016787; GO:0005975; GO:0005576; GO:0008152; GO:0005773; GO:0005618; GO:0016787; GO:0005975; GO:0005576; GO:0008152; GO:0005773; GO:0005618; GO:0016787; GO:0005975; GO:0005576; GO:0008152; GO:0005773; GO:0005618	molecular_function; biological_process; cellular_component; biological_process; cellular_component; cellular_component; molecular_function; biological_process; cellular_component; biological_process; cellular_component; cellular_component; molecular_function; biological_process; cellular_component; biological_process; cellular_component; cellular_component	hydrolase activity; carbohydrate metabolic process; extracellular region; metabolic process; vacuole; cell wall; hydrolase activity; carbohydrate metabolic process; extracellular region; metabolic process; vacuole; cell wall; hydrolase activity; carbohydrate metabolic process; extracellular region; metabolic process; vacuole; cell wall	TAIR:AT3G10740; TAIR:AT3G10740; TAIR:AT3G10740; TAIR:AT3G10740; TAIR:AT3G10740; TAIR:AT3G10740; TAIR:AT3G10740; TAIR:AT3G10740; TAIR:AT3G10740; TAIR:AT3G10740; TAIR:AT3G10740; TAIR:AT3G10740; TAIR:AT3G10740; TAIR:AT3G10740; TAIR:AT3G10740; TAIR:AT3G10740; TAIR:AT3G10740; TAIR:AT3G10740	PF06964.5	Alpha-L-AF_C	Family	IPR008979	Galactose-binding domain-like	N/A	Q10M78;; Q10M79	NA	NA	NA	LOC_Os03g20420	NA	NA	NA	NA	NA	NA	NA	NA
XLOC_028072	XLOC_028072	LOC_Os03g20840	Chr3:11798064-11802045	0.826421	4.52745	2.45375	3.09401	0.0073	0.235326	no	disease resistance RPP13-like protein 1, putative, expressed	GO:0005515; GO:0006950	molecular_function; biological_process	protein binding; response to stress	TAIR:AT3G14470; TAIR:AT3G14470	PF00931.15	NB-ARC	Domain	N/A	N/A	N/A	Q10M36	4332698;	NP_001049979.1;	osa:4332698;	LOC_Os03g20840	NA	NA	NA	NA	NA	NA	NA	NA
XLOC_028437	XLOC_028437	LOC_Os03g29410	Chr3:16749299-16754225	0.384231	2.9956	2.9628	2.70693	0.03735	0.539988	no	tyrosine protein kinase domain containing protein, putative, expressed	GO:0005575; GO:0008152; GO:0009987; GO:0016301; GO:0006950; GO:0009607	cellular_component; biological_process; biological_process; molecular_function; biological_process; biological_process	cellular_component; metabolic process; cellular process; kinase activity; response to stress; response to biotic stimulus	TAIR:AT2G05940; TAIR:AT2G05940; TAIR:AT2G05940; TAIR:AT2G05940; TAIR:AT2G05940; TAIR:AT2G05940	PF07714.10	Pkinase_Tyr	Domain	IPR020635	Tyrosine-protein kinase, catalytic domain	N/A	Q10JU0	4333082;	NP_001050336.1;	osa:4333082;	LOC_Os03g29410	NA	NA	NA	NA	NA	NA	NA	NA
XLOC_028443	XLOC_028443	LOC_Os03g29540	Chr3:16836621-16840754	2.53309	14.5639	2.52342	3.3364	0.0028	0.145931	no	ATP-dependent protease, putative, expressed	GO:0019538; GO:0009056; GO:0006139; GO:0016787; GO:0009536; GO:0019538; GO:0009056; GO:0006139; GO:0016787; GO:0009536; GO:0019538; GO:0009056; GO:0006139; GO:0016787; GO:0009536	biological_process; biological_process; biological_process; molecular_function; cellular_component; biological_process; biological_process; biological_process; molecular_function; cellular_component; biological_process; biological_process; biological_process; molecular_function; cellular_component	protein metabolic process; catabolic process; nucleobase, nucleoside, nucleotide and nucleic acid metabolic process; hydrolase activity; plastid; protein metabolic process; catabolic process; nucleobase, nucleoside, nucleotide and nucleic acid metabolic process; hydrolase activity; plastid; protein metabolic process; catabolic process; nucleobase, nucleoside, nucleotide and nucleic acid metabolic…	TAIR:AT1G75460; TAIR:AT1G75460; TAIR:AT1G75460; TAIR:AT1G75460; TAIR:AT1G75460; TAIR:AT1G75460; TAIR:AT1G75460; TAIR:AT1G75460; TAIR:AT1G75460; TAIR:AT1G75460; TAIR:AT1G75460; TAIR:AT1G75460; TAIR:AT1G75460; TAIR:AT1G75460; TAIR:AT1G75460	PF02190.9	LON	Family	N/A	N/A	N/A	Q75K52	NA	NA	NA	LOC_Os03g29540	NA	NA	NA	NA	NA	NA	NA	NA
XLOC_028536	XLOC_028536	LOC_Os03g31750	Chr3:18153142-18160127	0.931456	4.19073	2.16964	2.31314	0.02655	0.460944	no	pyruvate, phosphate dikinase, chloroplast precursor, putative, expressed	GO:0008152; GO:0009987; GO:0005634; GO:0016301; GO:0005829; GO:0016740; GO:0009536; GO:0008152; GO:0009987; GO:0005634; GO:0016301; GO:0005829; GO:0016740; GO:0009536; GO:0008152; GO:0009987; GO:0005634; GO:0016301; GO:0005829; GO:0016740; GO:0009536	biological_process; biological_process; cellular_component; molecular_function; cellular_component; molecular_function; cellular_component; biological_process; biological_process; cellular_component; molecular_function; cellular_component; molecular_function; cellular_component; biological_process; biological_process; cellular_component; molecular_function; cellular_component; molecular_function;…	metabolic process; cellular process; nucleus; kinase activity; cytosol; transferase activity; plastid; metabolic process; cellular process; nucleus; kinase activity; cytosol; transferase activity; plastid; metabolic process; cellular process; nucleus; kinase activity; cytosol; transferase activity; plastid	TAIR:AT4G15530; TAIR:AT4G15530; TAIR:AT4G15530; TAIR:AT4G15530; TAIR:AT4G15530; TAIR:AT4G15530; TAIR:AT4G15530; TAIR:AT4G15530; TAIR:AT4G15530; TAIR:AT4G15530; TAIR:AT4G15530; TAIR:AT4G15530; TAIR:AT4G15530; TAIR:AT4G15530; TAIR:AT4G15530; TAIR:AT4G15530; TAIR:AT4G15530; TAIR:AT4G15530; TAIR:AT4G15530; TAIR:AT4G15530; TAIR:AT4G15530	PF00391.16	PEP-utilizers	Family	IPR013816	ATP-grasp fold, subdomain 2	Molecular Function: catalytic activity (GO:0003824), Molecular Function: ATP binding (GO:0005524)	Q75KR1	4333181;	NP_001050430.1;	osa:4333181;	LOC_Os03g31750	NA	NA	NA	NA	NA	NA	NA	NA
XLOC_028888	XLOC_028888	LOC_Os03g40194,LOC_Os03g40210	Chr3:22347659-22354876	0.771695	3.29897	2.09591	1.61906	0.0349	0.523451	no	disease resistance RPP13-like protein 1, putative, expressed	GO:0005515; GO:0006950	molecular_function; biological_process	protein binding; response to stress	TAIR:AT3G14470; TAIR:AT3G14470	PF00560.26	LRR_1	Repeat	IPR000767	Disease resistance protein	Biological Process: defense response (GO:0006952)	Q10H75	NA	NA	NA	LOC_Os03g40194	NA	NA	NA	NA	NA	NA	NA	NA
XLOC_029165	XLOC_029165	LOC_Os03g46070	Chr3:26034425-26035357	1.47596	24.7601	4.06829	4.33957	0.0072	0.233525	no	thaumatin, putative, expressed	GO:0005623; GO:0006950; GO:0009607; GO:0009628	cellular_component; biological_process; biological_process; biological_process	cell; response to stress; response to biotic stimulus; response to abiotic stimulus	TAIR:AT4G11650; TAIR:AT4G11650; TAIR:AT4G11650; TAIR:AT4G11650	PF00314.10	Thaumatin	Domain	IPR001938	Thaumatin, pathogenesis-related	N/A	Q75GX4	NA	NA	NA	LOC_Os03g46070	NA	NA	NA	NA	NA	NA	NA	NA
XLOC_029591	XLOC_029591	LOC_Os03g55970	Chr3:31860448-31863401	5.05739	24.8843	2.29877	3.47911	0.0009	0.0758121	no	uncharacterized protein ycf44, putative, expressed	GO:0003674; GO:0016043; GO:0009987; GO:0009536	molecular_function; biological_process; biological_process; cellular_component	molecular_function; cellular component organization; cellular process; plastid	TAIR:AT1G49380; TAIR:AT1G49380; TAIR:AT1G49380; TAIR:AT1G49380	PF05140.7	ResB	Family	N/A	N/A	N/A	Q75KA9	4334251;	NP_001051397.1;	osa:4334251;	LOC_Os03g55970	NA	NA	NA	NA	NA	NA	NA	NA
XLOC_029604	XLOC_029604	LOC_Os03g56250	Chr3:32043842-32048414	3.37999	13.736	2.02287	2.98702	0.0056	0.206727	no	LRR receptor-like protein kinase, putative, expressed	GO:0000166; GO:0005575; GO:0006464; GO:0005618; GO:0007165; GO:0016301; GO:0005886	molecular_function; cellular_component; biological_process; cellular_component; biological_process; molecular_function; cellular_component	nucleotide binding; cellular_component; protein modification process; cell wall; signal transduction; kinase activity; plasma membrane	TAIR:AT2G16250; TAIR:AT2G16250; TAIR:AT2G16250; TAIR:AT2G16250; TAIR:AT2G16250; TAIR:AT2G16250; TAIR:AT2G16250	PF00560.26	LRR_1	Repeat	N/A	N/A	N/A	Q7XZX3	4334271;	NP_001051416.2;	osa:4334271;	LOC_Os03g56250	NA	NA	NA	NA	NA	NA	NA	NA
XLOC_029689	XLOC_029689	LOC_Os03g57680	Chr3:32869481-32877206	1.7	7.0992	2.06212	2.87818	0.0094	0.271355	no	aldehyde oxidase, putative, expressed	GO:0003824; GO:0008152; GO:0009058; GO:0009987	molecular_function; biological_process; biological_process; biological_process	catalytic activity; metabolic process; biosynthetic process; cellular process	TAIR:AT5G20960; TAIR:AT5G20960; TAIR:AT5G20960; TAIR:AT5G20960	PF01315.15	Ald_Xan_dh_C	Domain	IPR000674	Aldehyde oxidase/xanthine dehydrogenase, a/b hammerhead	Molecular Function: oxidoreductase activity (GO:0016491), Biological Process: oxidation reduction (GO:0055114)	Q852M2;; Q10C91	NA	NA	NA	LOC_Os03g57680	PWY-3181	tryptophan degradation VI (via tryptamine)	INDOLE-3-ACETALDEHYDE-OXIDASE-RXN	EC-1.2.3.7	GN7F-20308-MONOMER	indole-3-acetaldehyde oxidase	GN7F-20308	LOC_Os03g57720.1
XLOC_029829	XLOC_029829	LOC_Os03g60840	Chr3:34566987-34568087	33.9862	173.332	2.35052	3.68125	0.00115	0.0872812	no	BBTI13 - Bowman-Birk type bran trypsin inhibitor precursor, expressed	NA	NA	NA	NA	PF00228.13	Bowman-Birk_leg	Domain	IPR000877	Proteinase inhibitor I12, Bowman-Birk	Molecular Function: serine-type endopeptidase inhibitor activity (GO:0004867), Cellular Component: extracellular region (GO:0005576)	Q84LH6	4334617;	NP_001051742.1;	osa:4334617;	LOC_Os03g60840	NA	NA	NA	NA	NA	NA	NA	NA
XLOC_029846	XLOC_029846	LOC_Os03g61150	Chr3:34733452-34734781	1.06149	13.8875	3.70962	3.73809	0.0065	0.220558	no	expressed protein	GO:0003674; GO:0005575; GO:0005515; GO:0009058; GO:0006464; GO:0006091; GO:0003674; GO:0005575; GO:0005515; GO:0009058; GO:0006464; GO:0006091	molecular_function; cellular_component; molecular_function; biological_process; biological_process; biological_process; molecular_function; cellular_component; molecular_function; biological_process; biological_process; biological_process	molecular_function; cellular_component; protein binding; biosynthetic process; protein modification process; generation of precursor metabolites and energy; molecular_function; cellular_component; protein binding; biosynthetic process; protein modification process; generation of precursor metabolites and energy	TAIR:AT1G19530; TAIR:AT1G19530; TAIR:AT1G19530; TAIR:AT1G19530; TAIR:AT1G19530; TAIR:AT1G19530; TAIR:AT1G19530; TAIR:AT1G19530; TAIR:AT1G19530; TAIR:AT1G19530; TAIR:AT1G19530; TAIR:AT1G19530	NA	NA	NA	N/A	N/A	N/A	Q10B91;; Q94GF4;; Q10B89	4334643;	NP_001051767.1;	osa:4334643;	LOC_Os03g61150	NA	NA	NA	NA	NA	NA	NA	NA
XLOC_029881	XLOC_029881	LOC_Os03g61910	Chr3:35095280-35098784	0.461426	7.05271	3.93401	3.68478	0.0135	0.323878	no	NA	NA	NA	NA	NA	PF03732.10	Retrotrans_gag	Family	IPR005162	Retrotransposon gag protein	N/A	Q10B03	4334696;	NP_001051816.1;	osa:4334696;	LOC_Os03g61910	NA	NA	NA	NA	NA	NA	NA	NA
XLOC_030661	XLOC_030661	LOC_Os04g16820	Chr4:9186717-9190190	4.86207	48.1793	3.30877	5.01623	5e-05	0.0117035	yes	DNA-directed RNA polymerase subunit beta, putative, expressed	GO:0016740; GO:0005515; GO:0006139; GO:0009058; GO:0005622; GO:0009536	molecular_function; molecular_function; biological_process; biological_process; cellular_component; cellular_component	transferase activity; protein binding; nucleobase, nucleoside, nucleotide and nucleic acid metabolic process; biosynthetic process; intracellular; plastid	TAIR:ATCG00190; TAIR:ATCG00190; TAIR:ATCG00190; TAIR:ATCG00190; TAIR:ATCG00190; TAIR:ATCG00190	PF04565.9	RNA_pol_Rpb2_3	Domain	N/A	N/A	N/A	NA	NA	NA	NA	LOC_Os04g16820	NA	NA	NA	NA	NA	NA	NA	NA
XLOC_030662	XLOC_030662	LOC_Os04g16830	Chr4:9190921-9195969	10.081	53.951	2.42001	3.77127	0.00065	0.0608584	no	DNA-directed RNA polymerase subunit beta, putative, expressed	GO:0016740; GO:0006139; GO:0009058; GO:0005622; GO:0009536	molecular_function; biological_process; biological_process; cellular_component; cellular_component	transferase activity; nucleobase, nucleoside, nucleotide and nucleic acid metabolic process; biosynthetic process; intracellular; plastid	TAIR:ATCG00170; TAIR:ATCG00170; TAIR:ATCG00170; TAIR:ATCG00170; TAIR:ATCG00170	PF00623.13	RNA_pol_Rpb1_2	Domain	N/A	N/A	N/A	NA	NA	NA	NA	LOC_Os04g16830	NA	NA	NA	NA	NA	NA	NA	NA
XLOC_030745	XLOC_030745	LOC_Os04g18690	Chr4:10291036-10423930	2.43663	20.8524	3.09725	3.0721	0.0228	0.426945	no	NA	NA	NA	NA	NA	PF10536.2	PMD	Domain	N/A	N/A	N/A	NA	NA	NA	NA	LOC_Os04g18690	NA	NA	NA	NA	NA	NA	NA	NA
XLOC_030904	XLOC_030904	LOC_Os04g21790,LOC_Os04g21820	Chr4:12343296-12408944	0.835976	8.79703	3.39548	2.81556	0.03095	0.49178	no	OsWAK34 - OsWAK receptor-like protein kinase, expressed	GO:0016043; GO:0009653; GO:0016049; GO:0016301; GO:0000166; GO:0005488; GO:0006464; GO:0009791; GO:0005886	biological_process; biological_process; biological_process; molecular_function; molecular_function; molecular_function; biological_process; biological_process; cellular_component	cellular component organization; anatomical structure morphogenesis; cell growth; kinase activity; nucleotide binding; binding; protein modification process; post-embryonic development; plasma membrane	TAIR:AT1G21210; TAIR:AT1G21210; TAIR:AT1G21210; TAIR:AT1G21210; TAIR:AT1G21210; TAIR:AT1G21210; TAIR:AT1G21210; TAIR:AT1G21210; TAIR:AT1G21210	PF07714.10	Pkinase_Tyr	Domain	N/A	N/A	N/A	NA	NA	NA	NA	LOC_Os04g21790	NA	NA	NA	NA	NA	NA	NA	NA
XLOC_031018	XLOC_031018	LOC_Os04g24220,LOC_Os04g24290	Chr4:13863221-13915062	2.74918	14.5867	2.40758	3.46988	0.00185	0.113532	no	OsWAK32 - OsWAK receptor-like protein kinase, expressed	GO:0006950; GO:0009607; GO:0008152; GO:0009987; GO:0016301; GO:0007165; GO:0005773; GO:0008150; GO:0005618; GO:0005515; GO:0005886; GO:0005623; GO:0008152; GO:0009987; GO:0016301; GO:0006464; GO:0016020; GO:0005623; GO:0008152; GO:0009987; GO:0009607; GO:0005618; GO:0016301; GO:0016020	biological_process; biological_process; biological_process; biological_process; molecular_function; biological_process; cellular_component; biological_process; cellular_component; molecular_function; cellular_component; cellular_component; biological_process; biological_process; molecular_function; biological_process; cellular_component; cellular_component; biological_process; biological_process;…	response to stress; response to biotic stimulus; metabolic process; cellular process; kinase activity; signal transduction; vacuole; biological_process; cell wall; protein binding; plasma membrane; cell; metabolic process; cellular process; kinase activity; protein modification process; membrane; cell; metabolic process; cellular process; response to biotic stimulus; cell wall; kinase activity; m…	TAIR:AT1G21250; TAIR:AT1G21250; TAIR:AT1G21250; TAIR:AT1G21250; TAIR:AT1G21250; TAIR:AT1G21250; TAIR:AT1G21250; TAIR:AT1G21250; TAIR:AT1G21250; TAIR:AT1G21250; TAIR:AT1G21250; TAIR:AT1G16260; TAIR:AT1G16260; TAIR:AT1G16260; TAIR:AT1G16260; TAIR:AT1G16260; TAIR:AT1G16260; TAIR:AT1G79670; TAIR:AT1G79670; TAIR:AT1G79670; TAIR:AT1G79670; TAIR:AT1G79670; TAIR:AT1G79670; TAIR:AT1G79670	PF00069.18	Pkinase	Domain	N/A	N/A	N/A	NA	NA	NA	NA	LOC_Os04g24220	NA	NA	NA	NA	NA	NA	NA	NA
XLOC_031273	XLOC_031273	LOC_Os04g29550	Chr4:17560645-17561444	3.80067	50.0391	3.71873	4.51974	0.00125	0.0923534	no	RIPER2 - Ripening-related family protein precursor, expressed	NA	NA	NA	NA	NA	NA	NA	IPR009009	Barwin-related endoglucanase	N/A	Q7XVA8	4335579;	NP_001052553.1;	osa:4335579;	LOC_Os04g29550	NA	NA	NA	NA	NA	NA	NA	NA
XLOC_031402	XLOC_031402	LOC_Os04g32110	Chr4:19269217-19271345	2.73697	24.1251	3.13988	4.33235	0.0003	0.0400758	yes	ACT domain containing protein, expressed	GO:0005488; GO:0005829; GO:0009719; GO:0008152; GO:0009987	molecular_function; cellular_component; biological_process; biological_process; biological_process	binding; cytosol; response to endogenous stimulus; metabolic process; cellular process	TAIR:AT1G69040; TAIR:AT1G69040; TAIR:AT1G69040; TAIR:AT1G69040; TAIR:AT1G69040	PF01842.18	ACT	Domain	N/A	N/A	N/A	NA	NA	NA	NA	LOC_Os04g32110	NA	NA	NA	NA	NA	NA	NA	NA
XLOC_031434	XLOC_031434	LOC_Os04g32740	Chr4:19735870-19741030	0.339015	5.59414	4.0445	3.54147	0.0102	0.282799	no	hydrolase, NUDIX family, domain containing protein, expressed	GO:0008152; GO:0016787; GO:0008150	biological_process; molecular_function; biological_process	metabolic process; hydrolase activity; biological_process	TAIR:AT1G12880; TAIR:AT1G12880; TAIR:AT1G12880	PF00293.21	NUDIX	Domain	N/A	N/A	N/A	NA	NA	NA	NA	LOC_Os04g32740	NA	NA	NA	NA	NA	NA	NA	NA
XLOC_031440	XLOC_031440	LOC_Os04g32920	Chr4:19886673-19892492	0.855472	6.41994	2.90777	3.37219	0.00475	0.192548	no	potassium transporter, putative, expressed	GO:0016020; GO:0006810; GO:0009987; GO:0005215; GO:0016020; GO:0006810; GO:0009987; GO:0005215; GO:0016020; GO:0006810; GO:0009987; GO:0005215; GO:0016020; GO:0006810; GO:0009987; GO:0005215; GO:0016020; GO:0006810; GO:0009987; GO:0005215	cellular_component; biological_process; biological_process; molecular_function; cellular_component; biological_process; biological_process; molecular_function; cellular_component; biological_process; biological_process; molecular_function; cellular_component; biological_process; biological_process; molecular_function; cellular_component; biological_process; biological_process; molecular_function	membrane; transport; cellular process; transporter activity; membrane; transport; cellular process; transporter activity; membrane; transport; cellular process; transporter activity; membrane; transport; cellular process; transporter activity; membrane; transport; cellular process; transporter activity	TAIR:AT4G13420; TAIR:AT4G13420; TAIR:AT4G13420; TAIR:AT4G13420; TAIR:AT4G13420; TAIR:AT4G13420; TAIR:AT4G13420; TAIR:AT4G13420; TAIR:AT4G13420; TAIR:AT4G13420; TAIR:AT4G13420; TAIR:AT4G13420; TAIR:AT4G13420; TAIR:AT4G13420; TAIR:AT4G13420; TAIR:AT4G13420; TAIR:AT4G13420; TAIR:AT4G13420; TAIR:AT4G13420; TAIR:AT4G13420	PF02705.9	K_trans	Family	N/A	N/A	N/A	Q6VVA6	4335729;	NP_001052689.1;	osa:4335729;	LOC_Os04g32920	NA	NA	NA	NA	NA	NA	NA	NA
XLOC_031471	XLOC_031471	LOC_Os04g33610	Chr4:20358376-20359628	5.70755	26.9985	2.24194	3.14722	0.0045	0.188053	no	expressed protein	GO:0003674; GO:0005575; GO:0009628	molecular_function; cellular_component; biological_process	molecular_function; cellular_component; response to abiotic stimulus	TAIR:AT3G52740; TAIR:AT3G52740; TAIR:AT3G52740	NA	NA	NA	N/A	N/A	N/A	NA	NA	NA	NA	LOC_Os04g33610	NA	NA	NA	NA	NA	NA	NA	NA
XLOC_031522	XLOC_031522	LOC_Os04g34360	Chr4:20810671-20815234	2.90517	15.5065	2.41617	2.66609	0.00965	0.274012	no	serine/threonine-protein kinase receptor precursor, putative, expressed	GO:0005623; GO:0016301; GO:0000166; GO:0030246; GO:0009875; GO:0006464	cellular_component; molecular_function; molecular_function; molecular_function; biological_process; biological_process	cell; kinase activity; nucleotide binding; carbohydrate binding; pollen-pistil interaction; protein modification process	TAIR:AT2G19130; TAIR:AT2G19130; TAIR:AT2G19130; TAIR:AT2G19130; TAIR:AT2G19130; TAIR:AT2G19130	PF08276.4	PAN_2	Family	IPR000719	Protein kinase, catalytic domain	Molecular Function: protein kinase activity (GO:0004672), Molecular Function: ATP binding (GO:0005524), Biological Process: protein amino acid phosphorylation (GO:0006468)	NA	NA	NA	NA	LOC_Os04g34360	PWY-6952	glycerophosphodiester degradation	GLYCPDIESTER-RXN	EC-3.1.4.46	GN7F-17150-MONOMER	glycerophosphodiester phosphodiesterase	GN7F-17150	LOC_Os08g24630.1
XLOC_031564	XLOC_031564	LOC_Os04g35130	Chr4:21349783-21353260	0.576776	5.75268	3.31815	3.19883	0.02405	0.43795	no	expressed protein	GO:0003674; GO:0008150; GO:0005886	molecular_function; biological_process; cellular_component	molecular_function; biological_process; plasma membrane	TAIR:AT5G42860; TAIR:AT5G42860; TAIR:AT5G42860	NA	NA	NA	N/A	N/A	N/A	NA	NA	NA	NA	LOC_Os04g35130	NA	NA	NA	NA	NA	NA	NA	NA
XLOC_031581	XLOC_031581	LOC_Os04g35540	Chr4:21637781-21642647	0.433442	4.42571	3.352	3.19404	0.0178	0.379227	no	amino acid permease family protein, putative, expressed	GO:0016020; GO:0006810; GO:0005215; GO:0009987	cellular_component; biological_process; molecular_function; biological_process	membrane; transport; transporter activity; cellular process	TAIR:AT2G01170; TAIR:AT2G01170; TAIR:AT2G01170; TAIR:AT2G01170	PF00324.14	AA_permease	Family	N/A	N/A	N/A	NA	NA	NA	NA	LOC_Os04g35540	NA	NA	NA	NA	NA	NA	NA	NA
XLOC_031688	XLOC_031688	LOC_Os04g38530	Chr4:22893764-22898657	1.16986	9.32734	2.99513	3.18483	0.01675	0.365995	no	aldose 1-epimerase, putative, expressed	GO:0003824; GO:0005975; GO:0009987	molecular_function; biological_process; biological_process	catalytic activity; carbohydrate metabolic process; cellular process	TAIR:AT5G15140; TAIR:AT5G15140; TAIR:AT5G15140	PF01263.13	Aldose_epim	Family	N/A	N/A	N/A	NA	NA	NA	NA	LOC_Os04g38530	NA	NA	NA	NA	NA	NA	NA	NA
XLOC_031696	XLOC_031696	LOC_Os04g38680	Chr4:22977813-22980352	1.95831	11.1151	2.50484	3.19868	0.00585	0.209665	no	transmembrane amino acid transporter protein, putative, expressed	GO:0016020; GO:0005773; GO:0006810; GO:0009987; GO:0005215	cellular_component; cellular_component; biological_process; biological_process; molecular_function	membrane; vacuole; transport; cellular process; transporter activity	TAIR:AT3G28960; TAIR:AT3G28960; TAIR:AT3G28960; TAIR:AT3G28960; TAIR:AT3G28960	PF01490.11	Aa_trans	Family	N/A	N/A	N/A	NA	NA	NA	NA	LOC_Os04g38680	NA	NA	NA	NA	NA	NA	NA	NA
XLOC_031776	XLOC_031776	LOC_Os04g40630	Chr4:24115849-24118216	1.34175	30.5089	4.50704	5.3232	0.0001	0.0199623	yes	BTBZ4 - Bric-a-Brac, Tramtrack, Broad Complex BTB domain with TAZ zinc finger and Calmodulin-binding domains, expressed	GO:0009719; GO:0005634; GO:0007275; GO:0009058; GO:0006139; GO:0006950; GO:0005737; GO:0008150; GO:0005515; GO:0009719; GO:0005634; GO:0007275; GO:0009058; GO:0006139; GO:0006950; GO:0005737; GO:0008150; GO:0005515; GO:0009719; GO:0005634; GO:0007275; GO:0009058; GO:0006139; GO:0006950; GO:0005737; GO:0008150; GO:0005515; GO:0009719; GO:0005634; GO:0007275; GO:0009058; GO:0006139; GO:0006950; GO:…	biological_process; cellular_component; biological_process; biological_process; biological_process; biological_process; cellular_component; biological_process; molecular_function; biological_process; cellular_component; biological_process; biological_process; biological_process; biological_process; cellular_component; biological_process; molecular_function; biological_process; cellular_component;…	response to endogenous stimulus; nucleus; multicellular organismal development; biosynthetic process; nucleobase, nucleoside, nucleotide and nucleic acid metabolic process; response to stress; cytoplasm; biological_process; protein binding; response to endogenous stimulus; nucleus; multicellular organismal development; biosynthetic process; nucleobase, nucleoside, nucleotide and nucleic acid meta…	TAIR:AT5G63160; TAIR:AT5G63160; TAIR:AT5G63160; TAIR:AT5G63160; TAIR:AT5G63160; TAIR:AT5G63160; TAIR:AT5G63160; TAIR:AT5G63160; TAIR:AT5G63160; TAIR:AT5G63160; TAIR:AT5G63160; TAIR:AT5G63160; TAIR:AT5G63160; TAIR:AT5G63160; TAIR:AT5G63160; TAIR:AT5G63160; TAIR:AT5G63160; TAIR:AT5G63160; TAIR:AT5G63160; TAIR:AT5G63160; TAIR:AT5G63160; TAIR:AT5G63160; TAIR:AT5G63160; TAIR:AT5G63160; TAIR:AT5G63160;…	PF02135.9	zf-TAZ	Family	N/A	N/A	N/A	NA	NA	NA	NA	LOC_Os04g40630	NA	NA	NA	NA	NA	NA	NA	NA
XLOC_031810	XLOC_031810	LOC_Os04g41229	Chr4:24461145-24469009	4.14874	40.8301	3.29889	4.53831	5e-05	0.0117035	yes	helix-loop-helix DNA-binding domain containing protein, expressed	GO:0003677; GO:0009058; GO:0006139; GO:0005829; GO:0003700; GO:0003677; GO:0005634; GO:0009058; GO:0006139; GO:0003700	molecular_function; biological_process; biological_process; cellular_component; molecular_function; molecular_function; cellular_component; biological_process; biological_process; molecular_function	DNA binding; biosynthetic process; nucleobase, nucleoside, nucleotide and nucleic acid metabolic process; cytosol; sequence-specific DNA binding transcription factor activity; DNA binding; nucleus; biosynthetic process; nucleobase, nucleoside, nucleotide and nucleic acid metabolic process; sequence-specific DNA binding transcription factor activity	TAIR:AT1G05805; TAIR:AT1G05805; TAIR:AT1G05805; TAIR:AT1G05805; TAIR:AT1G05805; TAIR:AT2G42280; TAIR:AT2G42280; TAIR:AT2G42280; TAIR:AT2G42280; TAIR:AT2G42280	PF00010.19	HLH	Domain	N/A	N/A	N/A	NA	NA	NA	NA	LOC_Os04g41229	NA	NA	NA	NA	NA	NA	NA	NA
XLOC_031860	XLOC_031860	LOC_Os04g42250	Chr4:24993830-24999600	28.8871	127.095	2.13741	3.15907	0.0013	0.0947245	no	transferase family protein, putative, expressed	GO:0016740; GO:0008152; GO:0009058; GO:0009987; GO:0019748; GO:0005829; GO:0008150; GO:0016740; GO:0008152; GO:0009058; GO:0009987; GO:0019748; GO:0005829; GO:0008150; GO:0016740; GO:0008152; GO:0009058; GO:0009987; GO:0019748; GO:0005829; GO:0008150	molecular_function; biological_process; biological_process; biological_process; biological_process; cellular_component; biological_process; molecular_function; biological_process; biological_process; biological_process; biological_process; cellular_component; biological_process; molecular_function; biological_process; biological_process; biological_process; biological_process; cellular_component;…	transferase activity; metabolic process; biosynthetic process; cellular process; secondary metabolic process; cytosol; biological_process; transferase activity; metabolic process; biosynthetic process; cellular process; secondary metabolic process; cytosol; biological_process; transferase activity; metabolic process; biosynthetic process; cellular process; secondary metabolic process; cytosol; bi…	TAIR:AT5G48930; TAIR:AT5G48930; TAIR:AT5G48930; TAIR:AT5G48930; TAIR:AT5G48930; TAIR:AT5G48930; TAIR:AT5G48930; TAIR:AT5G48930; TAIR:AT5G48930; TAIR:AT5G48930; TAIR:AT5G48930; TAIR:AT5G48930; TAIR:AT5G48930; TAIR:AT5G48930; TAIR:AT5G48930; TAIR:AT5G48930; TAIR:AT5G48930; TAIR:AT5G48930; TAIR:AT5G48930; TAIR:AT5G48930; TAIR:AT5G48930	PF02458.8	Transferase	Family	IPR003480	Transferase	Molecular Function: transferase activity, transferring acyl groups other than amino-acyl groups (GO:0016747)	NA	NA	NA	NA	LOC_Os04g42250	NA	NA	NA	NA	NA	NA	NA	NA
XLOC_031906	XLOC_031906	LOC_Os04g43550	Chr4:25753655-25756605	2.50873	16.6872	2.73371	3.32243	0.00625	0.216661	no	MazG nucleotide pyrophosphohydrolase domain containing protein, expressed	GO:0003674; GO:0005575; GO:0008150	molecular_function; cellular_component; biological_process	molecular_function; cellular_component; biological_process	TAIR:AT3G25400; TAIR:AT3G25400; TAIR:AT3G25400	PF03819.10	MazG	Domain	IPR004518	NTP pyrophosphohydrolase MazG, putative catalytic core	N/A	NA	NA	NA	NA	LOC_Os04g43550	NA	NA	NA	NA	NA	NA	NA	NA
XLOC_032127	XLOC_032127	LOC_Os04g48270	Chr4:28751050-28754411	4.43214	17.8266	2.00796	2.88884	0.0082	0.25103	no	OsFBX148 - F-box domain containing protein, expressed	GO:0006950; GO:0030246; GO:0005515; GO:0009058; GO:0006464; GO:0006950; GO:0030246; GO:0005515; GO:0009058; GO:0006464; GO:0006950; GO:0030246; GO:0005515; GO:0009058; GO:0006464; GO:0005575; GO:0030246; GO:0005515; GO:0008150	biological_process; molecular_function; molecular_function; biological_process; biological_process; biological_process; molecular_function; molecular_function; biological_process; biological_process; biological_process; molecular_function; molecular_function; biological_process; biological_process; cellular_component; molecular_function; molecular_function; biological_process	response to stress; carbohydrate binding; protein binding; biosynthetic process; protein modification process; response to stress; carbohydrate binding; protein binding; biosynthetic process; protein modification process; response to stress; carbohydrate binding; protein binding; biosynthetic process; protein modification process; cellular_component; carbohydrate binding; protein binding; biologi…	TAIR:AT3G61060; TAIR:AT3G61060; TAIR:AT3G61060; TAIR:AT3G61060; TAIR:AT3G61060; TAIR:AT3G61060; TAIR:AT3G61060; TAIR:AT3G61060; TAIR:AT3G61060; TAIR:AT3G61060; TAIR:AT3G61060; TAIR:AT3G61060; TAIR:AT3G61060; TAIR:AT3G61060; TAIR:AT3G61060; TAIR:AT5G52120; TAIR:AT5G52120; TAIR:AT5G52120; TAIR:AT5G52120	NA	NA	NA	IPR001810	F-box domain, cyclin-like	N/A	NA	NA	NA	NA	LOC_Os04g48270	NA	NA	NA	NA	NA	NA	NA	NA
XLOC_032178	XLOC_032178	LOC_Os04g49194	Chr4:29331562-29338265	1.49861	11.5622	2.94771	3.37241	0.00745	0.238707	no	naringenin,2-oxoglutarate 3-dioxygenase, putative, expressed	GO:0005575; GO:0009607; GO:0009058; GO:0009987; GO:0019748; GO:0003824; GO:0008152	cellular_component; biological_process; biological_process; biological_process; biological_process; molecular_function; biological_process	cellular_component; response to biotic stimulus; biosynthetic process; cellular process; secondary metabolic process; catalytic activity; metabolic process	TAIR:AT5G24530; TAIR:AT5G24530; TAIR:AT5G24530; TAIR:AT5G24530; TAIR:AT5G24530; TAIR:AT5G24530; TAIR:AT5G24530	PF03171.13	2OG-FeII_Oxy	Domain	N/A	N/A	N/A	NA	NA	NA	NA	LOC_Os04g49194	NA	NA	NA	NA	NA	NA	NA	NA
XLOC_032199	XLOC_032199	LOC_Os04g49748	Chr4:29660958-29662569	0.493449	9.31324	4.23831	4.04292	0.0198	0.39715	no	purine permease, putative, expressed	GO:0016020; GO:0006810; GO:0009987; GO:0005215	cellular_component; biological_process; biological_process; molecular_function	membrane; transport; cellular process; transporter activity	TAIR:AT1G44750; TAIR:AT1G44750; TAIR:AT1G44750; TAIR:AT1G44750	PF03151.9	TPT	Family	N/A	N/A	N/A	NA	NA	NA	NA	LOC_Os04g49748	NA	NA	NA	NA	NA	NA	NA	NA
XLOC_032241	XLOC_032241	LOC_Os04g51030	Chr4:30209130-30214010	1.31868	7.6161	2.52996	2.822	0.01725	0.373221	no	wall-associated kinase 1, putative, expressed	GO:0005623; GO:0016301; GO:0006464; GO:0016020	cellular_component; molecular_function; biological_process; cellular_component	cell; kinase activity; protein modification process; membrane	TAIR:AT1G19390; TAIR:AT1G19390; TAIR:AT1G19390; TAIR:AT1G19390	PF07645.8	EGF_CA	Domain	N/A	N/A	N/A	NA	NA	NA	NA	LOC_Os04g51030	NA	NA	NA	NA	NA	NA	NA	NA
XLOC_032349	XLOC_032349	LOC_Os04g53120	Chr4:31637928-31644941	0.817786	8.04574	3.29843	4.48634	0.0006	0.0580256	no	NB-ARC domain containing protein, expressed	GO:0005515; GO:0006950	molecular_function; biological_process	protein binding; response to stress	TAIR:AT3G14470; TAIR:AT3G14470	PF02892.8	zf-BED	Domain	N/A	N/A	N/A	NA	NA	NA	NA	LOC_Os04g53120	NA	NA	NA	NA	NA	NA	NA	NA
XLOC_032387	XLOC_032387	LOC_Os04g53850	Chr4:32085527-32088507	1.59761	21.336	3.7393	4.46902	0.0016	0.105405	no	leucoanthocyanidin reductase, putative, expressed	GO:0009058; GO:0009987; GO:0019748; GO:0003824; GO:0008152	biological_process; biological_process; biological_process; molecular_function; biological_process	biosynthetic process; cellular process; secondary metabolic process; catalytic activity; metabolic process	TAIR:AT1G61720; TAIR:AT1G61720; TAIR:AT1G61720; TAIR:AT1G61720; TAIR:AT1G61720	PF01370.14	Epimerase	Family	IPR001509	NAD-dependent epimerase/dehydratase	Molecular Function: catalytic activity (GO:0003824), Biological Process: cellular metabolic process (GO:0044237), Molecular Function: coenzyme binding (GO:0050662)	NA	NA	NA	NA	LOC_Os04g53850	NA	NA	NA	NA	NA	NA	NA	NA
XLOC_032644	XLOC_032644	LOC_Os04g59480	Chr4:35360010-35363520	0.973202	6.71792	2.7872	2.66177	0.0349	0.523451	no	POT family protein, expressed	GO:0016020; GO:0006810; GO:0005215	cellular_component; biological_process; molecular_function	membrane; transport; transporter activity	TAIR:AT1G22540; TAIR:AT1G22540; TAIR:AT1G22540	PF00854.14	PTR2	Family	IPR000109	Oligopeptide transporter	Molecular Function: transporter activity (GO:0005215), Biological Process: oligopeptide transport (GO:0006857), Cellular Component: membrane (GO:0016020)	NA	NA	NA	NA	LOC_Os04g59480	NA	NA	NA	NA	NA	NA	NA	NA
XLOC_033247	XLOC_033247	LOC_Os04g12960	Chr4:7153700-7156100	0.544811	5.30179	3.28265	3.17541	0.023	0.428114	no	UDP-glucoronosyl/UDP-glucosyl transferase, putative, expressed	GO:0016740; GO:0005575; GO:0008152; GO:0009653; GO:0007275; GO:0006950; GO:0009628; GO:0009987; GO:0009719; GO:0009991; GO:0007154	molecular_function; cellular_component; biological_process; biological_process; biological_process; biological_process; biological_process; biological_process; biological_process; biological_process; biological_process	transferase activity; cellular_component; metabolic process; anatomical structure morphogenesis; multicellular organismal development; response to stress; response to abiotic stimulus; cellular process; response to endogenous stimulus; response to extracellular stimulus; cell communication	TAIR:AT1G05680; TAIR:AT1G05680; TAIR:AT1G05680; TAIR:AT1G05680; TAIR:AT1G05680; TAIR:AT1G05680; TAIR:AT1G05680; TAIR:AT1G05680; TAIR:AT1G05680; TAIR:AT1G05680; TAIR:AT1G05680	PF00201.11	UDPGT	Family	IPR002213	UDP-glucuronosyl/UDP-glucosyltransferase	Biological Process: metabolic process (GO:0008152), Molecular Function: transferase activity, transferring hexosyl groups (GO:0016758)	NA	NA	NA	NA	LOC_Os04g12960	NA	NA	NA	NA	NA	NA	NA	NA
XLOC_033672	XLOC_033672	LOC_Os04g22120	Chr4:12534143-12539671	0.622312	8.70059	3.8054	4.23866	0.0028	0.145931	no	protein kinase, putative, expressed	GO:0005623; GO:0008152; GO:0009987; GO:0016301; GO:0006464	cellular_component; biological_process; biological_process; molecular_function; biological_process	cell; metabolic process; cellular process; kinase activity; protein modification process	TAIR:AT5G10530; TAIR:AT5G10530; TAIR:AT5G10530; TAIR:AT5G10530; TAIR:AT5G10530	PF00069.18	Pkinase	Domain	N/A	N/A	N/A	NA	NA	NA	NA	LOC_Os04g22120	NA	NA	NA	NA	NA	NA	NA	NA
XLOC_033956	XLOC_033956	LOC_Os04g27910	Chr4:16482063-16487853	0.624108	2.64714	2.08457	2.01509	0.03235	0.503772	no	NA	NA	NA	NA	NA	NA	NA	NA	N/A	N/A	N/A	NA	NA	NA	NA	LOC_Os04g27910	NA	NA	NA	NA	NA	NA	NA	NA
XLOC_034019	XLOC_034019	LOC_Os04g29770,LOC_Os04g29790,LOC_Os04g29810	Chr4:17739173-17766782	3.09117	13.3439	2.10996	1.98335	0.0438	0.578966	no	wall-associated receptor kinase-like 3 precursor, putative, expressed	GO:0016301; GO:0005515; GO:0006464; GO:0005886	molecular_function; molecular_function; biological_process; cellular_component	kinase activity; protein binding; protein modification process; plasma membrane	TAIR:AT1G21240; TAIR:AT1G21240; TAIR:AT1G21240; TAIR:AT1G21240	PF07714.10	Pkinase_Tyr	Domain	N/A	N/A	N/A	NA	NA	NA	NA	LOC_Os04g29770	NA	NA	NA	NA	NA	NA	NA	NA
XLOC_034037	XLOC_034037	LOC_Os04g30030	Chr4:17913256-17917475	0.563496	5.77161	3.3565	3.06627	0.01125	0.296377	no	cysteine-rich receptor-like protein kinase 12 precursor, putative, expressed	GO:0005575; GO:0008152; GO:0009987; GO:0016301; GO:0000166; GO:0006464	cellular_component; biological_process; biological_process; molecular_function; molecular_function; biological_process	cellular_component; metabolic process; cellular process; kinase activity; nucleotide binding; protein modification process	TAIR:AT1G70740; TAIR:AT1G70740; TAIR:AT1G70740; TAIR:AT1G70740; TAIR:AT1G70740; TAIR:AT1G70740	PF00069.18	Pkinase	Domain	IPR020635	Tyrosine-protein kinase, catalytic domain	N/A	NA	NA	NA	NA	LOC_Os04g30030	NA	NA	NA	NA	NA	NA	NA	NA
XLOC_034038	XLOC_034038	LOC_Os04g30060,LOC_Os04g30090,LOC_Os04g30110	Chr4:17944490-17962882	2.40397	33.6666	3.80783	3.99036	0.00055	0.0555248	no	wall-associated receptor kinase-like 10 precursor, putative, expressed	GO:0005623; GO:0005618; GO:0016301; GO:0006464; GO:0016020	cellular_component; cellular_component; molecular_function; biological_process; cellular_component	cell; cell wall; kinase activity; protein modification process; membrane	TAIR:AT1G16120; TAIR:AT1G16120; TAIR:AT1G16120; TAIR:AT1G16120; TAIR:AT1G16120	PF00069.18	Pkinase	Domain	N/A	N/A	N/A	NA	NA	NA	NA	LOC_Os04g30060	NA	NA	NA	NA	NA	NA	NA	NA
XLOC_034044	XLOC_034044	LOC_Os04g30160	Chr4:18001018-18005396	0.3995	2.40775	2.59142	2.54756	0.0309	0.49178	no	OsWAK46 - OsWAK receptor-like protein kinase, expressed	GO:0016301; GO:0005515; GO:0006464; GO:0005886	molecular_function; molecular_function; biological_process; cellular_component	kinase activity; protein binding; protein modification process; plasma membrane	TAIR:AT1G21240; TAIR:AT1G21240; TAIR:AT1G21240; TAIR:AT1G21240	PF07645.8	EGF_CA	Domain	N/A	N/A	N/A	NA	NA	NA	NA	LOC_Os04g30160	NA	NA	NA	NA	NA	NA	NA	NA
XLOC_034047	XLOC_034047	LOC_Os04g30240	Chr4:18042128-18049438	4.91344	68.9054	3.80981	5.5185	5e-05	0.0117035	yes	OsWAK60 - OsWAK receptor-like protein kinase, expressed	GO:0016043; GO:0009653; GO:0016049; GO:0016301; GO:0000166; GO:0005488; GO:0006464; GO:0009791; GO:0005886	biological_process; biological_process; biological_process; molecular_function; molecular_function; molecular_function; biological_process; biological_process; cellular_component	cellular component organization; anatomical structure morphogenesis; cell growth; kinase activity; nucleotide binding; binding; protein modification process; post-embryonic development; plasma membrane	TAIR:AT1G21210; TAIR:AT1G21210; TAIR:AT1G21210; TAIR:AT1G21210; TAIR:AT1G21210; TAIR:AT1G21210; TAIR:AT1G21210; TAIR:AT1G21210; TAIR:AT1G21210	PF00069.18	Pkinase	Domain	IPR000719	Protein kinase, catalytic domain	Molecular Function: protein kinase activity (GO:0004672), Molecular Function: ATP binding (GO:0005524), Biological Process: protein amino acid phosphorylation (GO:0006468)	NA	NA	NA	NA	LOC_Os04g30240	NA	NA	NA	NA	NA	NA	NA	NA
XLOC_034048	XLOC_034048	LOC_Os04g30250	Chr4:18053115-18057666	4.04071	40.4355	3.32294	4.51978	0.00025	0.0350796	yes	wall-associated receptor kinase-like 5 precursor, putative, expressed	GO:0016043; GO:0009653; GO:0016049; GO:0000166; GO:0019725; GO:0006464; GO:0008150; GO:0016301; GO:0005488; GO:0005975; GO:0005886; GO:0016043; GO:0009653; GO:0016049; GO:0000166; GO:0019725; GO:0006464; GO:0008150; GO:0016301; GO:0005488; GO:0005975; GO:0005886; GO:0008152; GO:0009987; GO:0016301; GO:0006464; GO:0005886	biological_process; biological_process; biological_process; molecular_function; biological_process; biological_process; biological_process; molecular_function; molecular_function; biological_process; cellular_component; biological_process; biological_process; biological_process; molecular_function; biological_process; biological_process; biological_process; molecular_function; molecular_function;…	cellular component organization; anatomical structure morphogenesis; cell growth; nucleotide binding; cellular homeostasis; protein modification process; biological_process; kinase activity; binding; carbohydrate metabolic process; plasma membrane; cellular component organization; anatomical structure morphogenesis; cell growth; nucleotide binding; cellular homeostasis; protein modification proce…	TAIR:AT1G21270; TAIR:AT1G21270; TAIR:AT1G21270; TAIR:AT1G21270; TAIR:AT1G21270; TAIR:AT1G21270; TAIR:AT1G21270; TAIR:AT1G21270; TAIR:AT1G21270; TAIR:AT1G21270; TAIR:AT1G21270; TAIR:AT1G21270; TAIR:AT1G21270; TAIR:AT1G21270; TAIR:AT1G21270; TAIR:AT1G21270; TAIR:AT1G21270; TAIR:AT1G21270; TAIR:AT1G21270; TAIR:AT1G21270; TAIR:AT1G21270; TAIR:AT1G21270; TAIR:AT4G31100; TAIR:AT4G31100; TAIR:AT4G31100;…	NA	NA	NA	N/A	N/A	N/A	NA	NA	NA	NA	LOC_Os04g30250	NA	NA	NA	NA	NA	NA	NA	NA
XLOC_034054	XLOC_034054	LOC_Os04g30330,LOC_Os04g30340	Chr4:18098898-18106758	0.565112	5.76955	3.35185	3.18682	0.00755	0.240599	no	OsWAK59 - OsWAK receptor-like cytoplasmic kinase OsWAK-RLCK, expressed	GO:0009607; GO:0016301; GO:0006464; GO:0008150; GO:0006139; GO:0009058; GO:0005623; GO:0006950; GO:0016020; GO:0003824	biological_process; molecular_function; biological_process; biological_process; biological_process; biological_process; cellular_component; biological_process; cellular_component; molecular_function	response to biotic stimulus; kinase activity; protein modification process; biological_process; nucleobase, nucleoside, nucleotide and nucleic acid metabolic process; biosynthetic process; cell; response to stress; membrane; catalytic activity	TAIR:AT1G79680; TAIR:AT1G79680; TAIR:AT1G79680; TAIR:AT1G79680; TAIR:AT1G79680; TAIR:AT1G79680; TAIR:AT1G79680; TAIR:AT1G79680; TAIR:AT1G79680; TAIR:AT1G79680	PF07714.10	Pkinase_Tyr	Domain	N/A	N/A	N/A	NA	NA	NA	NA	LOC_Os04g30330	NA	NA	NA	NA	NA	NA	NA	NA
XLOC_034185	XLOC_034185	LOC_Os04g33240	Chr4:20109573-20110741	0.7277	4.43011	2.60593	2.34025	0.0493	0.60877	no	sex determination protein tasselseed-2, putative, expressed	GO:0005575; GO:0008152; GO:0003824; GO:0005488	cellular_component; biological_process; molecular_function; molecular_function	cellular_component; metabolic process; catalytic activity; binding	TAIR:AT3G51680; TAIR:AT3G51680; TAIR:AT3G51680; TAIR:AT3G51680	PF00106.18	adh_short	Domain	IPR002347	Glucose/ribitol dehydrogenase	Biological Process: metabolic process (GO:0008152), Molecular Function: oxidoreductase activity (GO:0016491), Biological Process: oxidation reduction (GO:0055114)	NA	NA	NA	NA	LOC_Os04g33240	PWY-5466	matairesinol biosynthesis	RXN-8680	EC-1.1.1	GN7F-19835-MONOMER		GN7F-19835	LOC_Os07g46860.1
XLOC_034330	XLOC_034330	LOC_Os04g36800	Chr4:22216908-22221345	0.744494	4.24977	2.51305	2.47674	0.02775	0.47126	no	3-oxoacyl-synthase, putative, expressed	GO:0016020; GO:0008152; GO:0003824; GO:0009790; GO:0016740; GO:0009536; GO:0016043; GO:0009987; GO:0016020; GO:0008152; GO:0003824; GO:0009790; GO:0016740; GO:0009536; GO:0016043; GO:0009987	cellular_component; biological_process; molecular_function; biological_process; molecular_function; cellular_component; biological_process; biological_process; cellular_component; biological_process; molecular_function; biological_process; molecular_function; cellular_component; biological_process; biological_process	membrane; metabolic process; catalytic activity; embryo development; transferase activity; plastid; cellular component organization; cellular process; membrane; metabolic process; catalytic activity; embryo development; transferase activity; plastid; cellular component organization; cellular process	TAIR:AT5G46290; TAIR:AT5G46290; TAIR:AT5G46290; TAIR:AT5G46290; TAIR:AT5G46290; TAIR:AT5G46290; TAIR:AT5G46290; TAIR:AT5G46290; TAIR:AT5G46290; TAIR:AT5G46290; TAIR:AT5G46290; TAIR:AT5G46290; TAIR:AT5G46290; TAIR:AT5G46290; TAIR:AT5G46290; TAIR:AT5G46290	PF02801.15	Ketoacyl-synt_C	Domain	IPR020841	Polyketide synthase, beta-ketoacyl synthase region	N/A	NA	NA	NA	NA	LOC_Os04g36800	NA	NA	NA	NA	NA	NA	NA	NA
XLOC_034348	XLOC_034348	LOC_Os04g37740	Chr4:22441953-22443707	0.724467	6.06835	3.06631	3.15111	0.01965	0.396599	no	zinc finger, C3HC4 type domain containing protein, expressed	GO:0009607; GO:0006464; GO:0008219; GO:0003824; GO:0008150; GO:0005488; GO:0005886	biological_process; biological_process; biological_process; molecular_function; biological_process; molecular_function; cellular_component	response to biotic stimulus; protein modification process; cell death; catalytic activity; biological_process; binding; plasma membrane	TAIR:AT5G10380; TAIR:AT5G10380; TAIR:AT5G10380; TAIR:AT5G10380; TAIR:AT5G10380; TAIR:AT5G10380; TAIR:AT5G10380	PF00097.18	zf-C3HC4	Domain	N/A	N/A	N/A	NA	NA	NA	NA	LOC_Os04g37740	NA	NA	NA	NA	NA	NA	NA	NA
XLOC_034350	XLOC_034350	LOC_Os04g37790	Chr4:22466366-22469010	0.69796	3.30185	2.24206	2.40336	0.0253	0.451085	no	expressed protein	GO:0003674; GO:0008150; GO:0003674; GO:0008150	molecular_function; biological_process; molecular_function; biological_process	molecular_function; biological_process; molecular_function; biological_process	TAIR:AT4G40020; TAIR:AT4G40020; TAIR:AT4G40020; TAIR:AT4G40020	NA	NA	NA	N/A	N/A	N/A	NA	NA	NA	NA	LOC_Os04g37790	NA	NA	NA	NA	NA	NA	NA	NA
XLOC_034435	XLOC_034435	LOC_Os04g39300	Chr4:23387953-23389585	2.08624	15.1331	2.85873	3.48756	0.0023	0.131535	no	heavy metal transport/detoxification protein, putative, expressed	GO:0005488; GO:0005739	molecular_function; cellular_component	binding; mitochondrion	TAIR:AT4G05030; TAIR:AT4G05030	PF00403.19	HMA	Domain	N/A	N/A	N/A	NA	NA	NA	NA	LOC_Os04g39300	NA	NA	NA	NA	NA	NA	NA	NA
XLOC_034436	XLOC_034436	LOC_Os04g39320	Chr4:23408375-23410250	4.61169	50.7619	3.46038	4.80307	0.00025	0.0350796	yes	expressed protein	GO:0005488; GO:0006810; GO:0005488; GO:0005739	molecular_function; biological_process; molecular_function; cellular_component	binding; transport; binding; mitochondrion	TAIR:AT1G55790; TAIR:AT1G55790; TAIR:AT4G05030; TAIR:AT4G05030	NA	NA	NA	N/A	N/A	N/A	NA	NA	NA	NA	LOC_Os04g39320	NA	NA	NA	NA	NA	NA	NA	NA
XLOC_034437	XLOC_034437	LOC_Os04g39350	Chr4:23422506-23423339	13.2506	111.026	3.06676	4.45251	5e-05	0.0117035	yes	heavy metal associated domain containing protein, expressed	GO:0005488; GO:0005739	molecular_function; cellular_component	binding; mitochondrion	TAIR:AT4G05030; TAIR:AT4G05030	NA	NA	NA	N/A	N/A	N/A	NA	NA	NA	NA	LOC_Os04g39350	NA	NA	NA	NA	NA	NA	NA	NA
XLOC_034467	XLOC_034467	LOC_Os04g39880	Chr4:23747524-23752767	10.9954	59.9873	2.44776	3.69423	0.00055	0.0555248	no	Os4bglu12 - beta-glucosidase, exo-beta-glucanase, expressed	GO:0005488; GO:0016787; GO:0008152; GO:0005975; GO:0003824; GO:0005623; GO:0005488; GO:0016787; GO:0008152; GO:0005975; GO:0003824; GO:0005623; GO:0005488; GO:0016787; GO:0008152; GO:0005975; GO:0003824	molecular_function; molecular_function; biological_process; biological_process; molecular_function; cellular_component; molecular_function; molecular_function; biological_process; biological_process; molecular_function; cellular_component; molecular_function; molecular_function; biological_process; biological_process; molecular_function	binding; hydrolase activity; metabolic process; carbohydrate metabolic process; catalytic activity; cell; binding; hydrolase activity; metabolic process; carbohydrate metabolic process; catalytic activity; cell; binding; hydrolase activity; metabolic process; carbohydrate metabolic process; catalytic activity	TAIR:AT5G42260; TAIR:AT5G42260; TAIR:AT5G42260; TAIR:AT5G42260; TAIR:AT5G42260; TAIR:AT2G44480; TAIR:AT2G44480; TAIR:AT2G44480; TAIR:AT2G44480; TAIR:AT2G44480; TAIR:AT2G44480; TAIR:AT2G44480; TAIR:AT2G44480; TAIR:AT2G44480; TAIR:AT2G44480; TAIR:AT2G44480; TAIR:AT2G44480	PF00232.11	Glyco_hydro_1	Domain	IPR001360	Glycoside hydrolase, family 1	Molecular Function: hydrolase activity, hydrolyzing O-glycosyl compounds (GO:0004553), Biological Process: carbohydrate metabolic process (GO:0005975)	Q7XKV4	4336145;	NP_001053070.1;	osa:4336145;	LOC_Os04g39880	NA	NA	NA	NA	NA	NA	NA	NA
XLOC_034497	XLOC_034497	LOC_Os04g40470	Chr4:24049069-24051142	0.314578	4.31698	3.77854	3.30605	0.0391	0.551865	no	cytochrome P450, putative, expressed	GO:0005623; GO:0003674; GO:0005488; GO:0003824; GO:0008152; GO:0019825	cellular_component; molecular_function; molecular_function; molecular_function; biological_process; molecular_function	cell; molecular_function; binding; catalytic activity; metabolic process; oxygen binding	TAIR:AT3G26310; TAIR:AT3G26310; TAIR:AT3G26310; TAIR:AT3G26310; TAIR:AT3G26310; TAIR:AT3G26310	PF00067.15	p450	Domain	IPR001128	Cytochrome P450	Molecular Function: monooxygenase activity (GO:0004497), Molecular Function: iron ion binding (GO:0005506), Molecular Function: electron carrier activity (GO:0009055), Molecular Function: heme binding (GO:0020037)	NA	NA	NA	NA	LOC_Os04g40470	PWY-861	dhurrin biosynthesis	RXN-12240	-	GN7F-29995-MONOMER		GN7F-29995	LOC_Os07g19130.1
XLOC_034522	XLOC_034522	LOC_Os04g40990	Chr4:24325763-24328254	0.262229	19.708	6.23181	5.51253	0.03195	0.500638	no	malate synthase, glyoxysomal, putative, expressed	GO:0005975; GO:0009987; GO:0008152; GO:0016740; GO:0005975; GO:0009987; GO:0008152; GO:0016740	biological_process; biological_process; biological_process; molecular_function; biological_process; biological_process; biological_process; molecular_function	carbohydrate metabolic process; cellular process; metabolic process; transferase activity; carbohydrate metabolic process; cellular process; metabolic process; transferase activity	TAIR:AT5G03860; TAIR:AT5G03860; TAIR:AT5G03860; TAIR:AT5G03860; TAIR:AT5G03860; TAIR:AT5G03860; TAIR:AT5G03860; TAIR:AT5G03860	PF01274.15	Malate_synthase	Family	N/A	N/A	N/A	Q7XUG1	9268154;	NP_001173993.1;	osa:9268154;	LOC_Os04g40990	NA	NA	NA	NA	NA	NA	NA	NA
XLOC_034629	XLOC_034629	LOC_Os04g43200	Chr4:25563392-25565204	1.03086	5.57808	2.43592	2.27878	0.0299	0.487322	no	caleosin related protein, putative, expressed	GO:0005623; GO:0009607; GO:0009987; GO:0006950; GO:0009628; GO:0008152; GO:0009719; GO:0005773; GO:0006629; GO:0008150; GO:0005488; GO:0016020; GO:0009536; GO:0003824; GO:0016043; GO:0009987; GO:0008152; GO:0003824; GO:0005488; GO:0006950; GO:0016020; GO:0009058; GO:0006629; GO:0000003; GO:0009791; GO:0009790	cellular_component; biological_process; biological_process; biological_process; biological_process; biological_process; biological_process; cellular_component; biological_process; biological_process; molecular_function; cellular_component; cellular_component; molecular_function; biological_process; biological_process; biological_process; molecular_function; molecular_function; biological_process;…	cell; response to biotic stimulus; cellular process; response to stress; response to abiotic stimulus; metabolic process; response to endogenous stimulus; vacuole; lipid metabolic process; biological_process; binding; membrane; plastid; catalytic activity; cellular component organization; cellular process; metabolic process; catalytic activity; binding; response to stress; membrane; biosynthetic …	TAIR:AT2G33380; TAIR:AT2G33380; TAIR:AT2G33380; TAIR:AT2G33380; TAIR:AT2G33380; TAIR:AT2G33380; TAIR:AT2G33380; TAIR:AT2G33380; TAIR:AT2G33380; TAIR:AT2G33380; TAIR:AT2G33380; TAIR:AT2G33380; TAIR:AT2G33380; TAIR:AT2G33380; TAIR:AT4G26740; TAIR:AT4G26740; TAIR:AT4G26740; TAIR:AT4G26740; TAIR:AT4G26740; TAIR:AT4G26740; TAIR:AT4G26740; TAIR:AT4G26740; TAIR:AT4G26740; TAIR:AT4G26740; TAIR:AT4G26740;…	PF05042.6	Caleosin	Family	IPR007736	Caleosin related	N/A	Q7FAX1	4336376;	NP_001053291.1;	osa:4336376;	LOC_Os04g43200	NA	NA	NA	NA	NA	NA	NA	NA
XLOC_034642	XLOC_034642	LOC_Os04g43410	Chr4:25681556-25693918	1.697	14.5203	3.09701	3.72408	0.00375	0.171013	no	Os4bglu18 - monolignol beta-glucoside homologue, expressed	GO:0005623; GO:0005488; GO:0016787; GO:0008152; GO:0005975; GO:0003824	cellular_component; molecular_function; molecular_function; biological_process; biological_process; molecular_function	cell; binding; hydrolase activity; metabolic process; carbohydrate metabolic process; catalytic activity	TAIR:AT4G21760; TAIR:AT4G21760; TAIR:AT4G21760; TAIR:AT4G21760; TAIR:AT4G21760; TAIR:AT4G21760	PF00232.11	Glyco_hydro_1	Domain	N/A	N/A	N/A	Q7XSK0	4336391;	NP_001053305.1;	osa:4336391;	LOC_Os04g43410	NA	NA	NA	NA	NA	NA	NA	NA
XLOC_034644	XLOC_034644	LOC_Os04g43440	Chr4:25708298-25712547	0.305188	5.23374	4.10007	2.85381	0.0128	0.314063	no	NB-ARC/LRR disease resistance protein, putative, expressed	GO:0009605; GO:0009607; GO:0006950; GO:0008219; GO:0005515; GO:0005886	biological_process; biological_process; biological_process; biological_process; molecular_function; cellular_component	response to external stimulus; response to biotic stimulus; response to stress; cell death; protein binding; plasma membrane	TAIR:AT4G26090; TAIR:AT4G26090; TAIR:AT4G26090; TAIR:AT4G26090; TAIR:AT4G26090; TAIR:AT4G26090	PF00931.15	NB-ARC	Domain	N/A	N/A	N/A	NA	NA	NA	NA	LOC_Os04g43440	NA	NA	NA	NA	NA	NA	NA	NA
XLOC_034684	XLOC_034684	LOC_Os04g44354	Chr4:26260449-26267430	0.578285	3.21934	2.47691	2.31438	0.0294	0.4833	no	UDP-glucoronosyl and UDP-glucosyl transferase domain containing protein, expressed	GO:0016740; GO:0008152; GO:0016740; GO:0008152; GO:0016740; GO:0008152; GO:0016740; GO:0008152	molecular_function; biological_process; molecular_function; biological_process; molecular_function; biological_process; molecular_function; biological_process	transferase activity; metabolic process; transferase activity; metabolic process; transferase activity; metabolic process; transferase activity; metabolic process	TAIR:AT3G22250; TAIR:AT3G22250; TAIR:AT3G22250; TAIR:AT3G22250; TAIR:AT3G22250; TAIR:AT3G22250; TAIR:AT3G22250; TAIR:AT3G22250	PF00201.11	UDPGT	Family	N/A	N/A	N/A	NA	NA	NA	NA	LOC_Os04g44354	NA	NA	NA	NA	NA	NA	NA	NA
XLOC_034691	XLOC_034691	LOC_Os04g44500	Chr4:26342442-26343781	2.23369	10.5125	2.23461	2.5196	0.02415	0.439015	no	GEM, putative, expressed	GO:0003674; GO:0005575; GO:0008150	molecular_function; cellular_component; biological_process	molecular_function; cellular_component; biological_process	TAIR:AT5G08350; TAIR:AT5G08350; TAIR:AT5G08350	PF02893.13	GRAM	Family	IPR004182	GRAM	N/A	NA	NA	NA	NA	LOC_Os04g44500	NA	NA	NA	NA	NA	NA	NA	NA
XLOC_034718	XLOC_034718	LOC_Os04g45090	Chr4:26674343-26676730	2.65372	12.8386	2.2744	2.74299	0.0104	0.285501	no	cytochrome b561, putative, expressed	GO:0016020; GO:0008152; GO:0003824; GO:0005773; GO:0009536; GO:0016020; GO:0008152; GO:0003824; GO:0005773; GO:0009536	cellular_component; biological_process; molecular_function; cellular_component; cellular_component; cellular_component; biological_process; molecular_function; cellular_component; cellular_component	membrane; metabolic process; catalytic activity; vacuole; plastid; membrane; metabolic process; catalytic activity; vacuole; plastid	TAIR:AT4G25570; TAIR:AT4G25570; TAIR:AT4G25570; TAIR:AT4G25570; TAIR:AT4G25570; TAIR:AT4G25570; TAIR:AT4G25570; TAIR:AT4G25570; TAIR:AT4G25570; TAIR:AT4G25570	PF03188.9	Cytochrom_B561	Family	N/A	N/A	N/A	Q7XMK3	4336503;	NP_001053410.1;	osa:4336503;	LOC_Os04g45090	NA	NA	NA	NA	NA	NA	NA	NA
XLOC_034831	XLOC_034831	LOC_Os04g47190	Chr4:28026450-28030559	2.67955	13.7541	2.3598	3.19836	0.00635	0.218268	no	aminotransferase domain containing protein, putative, expressed	GO:0016740; GO:0008152; GO:0009987; GO:0003824; GO:0005739; GO:0009536; GO:0016740; GO:0008152; GO:0009987; GO:0003824; GO:0005739; GO:0009536	molecular_function; biological_process; biological_process; molecular_function; cellular_component; cellular_component; molecular_function; biological_process; biological_process; molecular_function; cellular_component; cellular_component	transferase activity; metabolic process; cellular process; catalytic activity; mitochondrion; plastid; transferase activity; metabolic process; cellular process; catalytic activity; mitochondrion; plastid	TAIR:AT5G65780; TAIR:AT5G65780; TAIR:AT5G65780; TAIR:AT5G65780; TAIR:AT5G65780; TAIR:AT5G65780; TAIR:AT5G65780; TAIR:AT5G65780; TAIR:AT5G65780; TAIR:AT5G65780; TAIR:AT5G65780; TAIR:AT5G65780	PF01063.12	Aminotran_4	Domain	IPR005786	Branched-chain amino acid aminotransferase II	Molecular Function: branched-chain-amino-acid transaminase activity (GO:0004084), Biological Process: branched chain family amino acid metabolic process (GO:0009081)	NA	NA	NA	NA	LOC_Os04g47190	NA	NA	NA	NA	NA	NA	NA	NA
XLOC_034859	XLOC_034859	LOC_Os04g47780	Chr4:28341593-28343271	1.62912	14.1599	3.11964	3.73115	0.00335	0.159797	no	transmembrane amino acid transporter protein, putative, expressed	GO:0016020; GO:0006810; GO:0009987; GO:0005215	cellular_component; biological_process; biological_process; molecular_function	membrane; transport; cellular process; transporter activity	TAIR:AT4G38250; TAIR:AT4G38250; TAIR:AT4G38250; TAIR:AT4G38250	PF01490.11	Aa_trans	Family	N/A	N/A	N/A	NA	NA	NA	NA	LOC_Os04g47780	NA	NA	NA	NA	NA	NA	NA	NA
XLOC_034927	XLOC_034927	LOC_Os04g49160	Chr4:29317202-29318456	1.49929	15.8144	3.39889	3.85999	0.0045	0.188053	no	zinc finger, C3HC4 type domain containing protein, expressed	GO:0005623; GO:0008150; GO:0009719; GO:0005488	cellular_component; biological_process; biological_process; molecular_function	cell; biological_process; response to endogenous stimulus; binding	TAIR:AT3G61460; TAIR:AT3G61460; TAIR:AT3G61460; TAIR:AT3G61460	PF00097.18	zf-C3HC4	Domain	IPR018957	Zinc finger, C3HC4 RING-type	N/A	NA	NA	NA	NA	LOC_Os04g49160	NA	NA	NA	NA	NA	NA	NA	NA
XLOC_034940	XLOC_034940	LOC_Os04g49370	Chr4:29465484-29467049	4.89289	50.2534	3.36046	4.77229	0.0001	0.0199623	yes	expressed protein	GO:0006950; GO:0003674; GO:0008150; GO:0005654	biological_process; molecular_function; biological_process; cellular_component	response to stress; molecular_function; biological_process; nucleoplasm	TAIR:AT5G56550; TAIR:AT5G56550; TAIR:AT5G56550; TAIR:AT5G56550	NA	NA	NA	N/A	N/A	N/A	NA	NA	NA	NA	LOC_Os04g49370	NA	NA	NA	NA	NA	NA	NA	NA
XLOC_035080	XLOC_035080	LOC_Os04g52100	Chr4:30945117-30948691	2.0621	8.68472	2.07436	2.48924	0.0178	0.379227	no	peptidase, M24 family protein, putative, expressed	GO:0006464; GO:0019538; GO:0008152; GO:0016787; GO:0005739; GO:0009536	biological_process; biological_process; biological_process; molecular_function; cellular_component; cellular_component	protein modification process; protein metabolic process; metabolic process; hydrolase activity; mitochondrion; plastid	TAIR:AT1G13270; TAIR:AT1G13270; TAIR:AT1G13270; TAIR:AT1G13270; TAIR:AT1G13270; TAIR:AT1G13270	PF00557.17	Peptidase_M24	Domain	IPR001714	Peptidase M24, methionine aminopeptidase	Molecular Function: aminopeptidase activity (GO:0004177), Biological Process: proteolysis (GO:0006508), Molecular Function: metalloexopeptidase activity (GO:0008235)	NA	NA	NA	NA	LOC_Os04g52100	NA	NA	NA	NA	NA	NA	NA	NA
XLOC_035101	XLOC_035101	LOC_Os04g52640	Chr4:31317588-31328040	3.31571	17.2978	2.3832	3.43385	0.00125	0.0923534	no	SHR5-receptor-like kinase, putative, expressed	GO:0016301; GO:0000166; GO:0006464; GO:0005886; GO:0016301; GO:0000166; GO:0006464; GO:0005886; GO:0016301; GO:0000166; GO:0006464; GO:0005886	molecular_function; molecular_function; biological_process; cellular_component; molecular_function; molecular_function; biological_process; cellular_component; molecular_function; molecular_function; biological_process; cellular_component	kinase activity; nucleotide binding; protein modification process; plasma membrane; kinase activity; nucleotide binding; protein modification process; plasma membrane; kinase activity; nucleotide binding; protein modification process; plasma membrane	TAIR:AT1G56140; TAIR:AT1G56140; TAIR:AT1G56140; TAIR:AT1G56140; TAIR:AT1G56140; TAIR:AT1G56140; TAIR:AT1G56140; TAIR:AT1G56140; TAIR:AT1G56140; TAIR:AT1G56140; TAIR:AT1G56140; TAIR:AT1G56140	PF00560.26	LRR_1	Repeat	IPR021720	Malectin/receptor-like protein kinase	N/A	NA	NA	NA	NA	LOC_Os04g52640	NA	NA	NA	NA	NA	NA	NA	NA
XLOC_035102	XLOC_035102	LOC_Os04g52670	Chr4:31349655-31350722	0.540478	5.17443	3.25909	2.82192	0.0457	0.587279	no	OsSAUR21 - Auxin-responsive SAUR gene family member, expressed	GO:0003674; GO:0009719	molecular_function; biological_process	molecular_function; response to endogenous stimulus	TAIR:AT1G16510; TAIR:AT1G16510	PF02519.7	Auxin_inducible	Family	N/A	N/A	N/A	NA	NA	NA	NA	LOC_Os04g52670	NA	NA	NA	NA	NA	NA	NA	NA
XLOC_035112	XLOC_035112	LOC_Os04g52810	Chr4:31439594-31443447	1.04301	7.14151	2.77547	3.08398	0.0089	0.262875	no	no apical meristem protein, putative, expressed	GO:0000003; GO:0009653; GO:0009791; GO:0009790; GO:0009058; GO:0006139; GO:0007275; GO:0009719; GO:0007165; GO:0003700	biological_process; biological_process; biological_process; biological_process; biological_process; biological_process; biological_process; biological_process; biological_process; molecular_function	reproduction; anatomical structure morphogenesis; post-embryonic development; embryo development; biosynthetic process; nucleobase, nucleoside, nucleotide and nucleic acid metabolic process; multicellular organismal development; response to endogenous stimulus; signal transduction; sequence-specific DNA binding transcription factor activity	TAIR:AT1G56010; TAIR:AT1G56010; TAIR:AT1G56010; TAIR:AT1G56010; TAIR:AT1G56010; TAIR:AT1G56010; TAIR:AT1G56010; TAIR:AT1G56010; TAIR:AT1G56010; TAIR:AT1G56010	PF02365.8	NAM	Family	N/A	N/A	N/A	NA	NA	NA	NA	LOC_Os04g52810	NA	NA	NA	NA	NA	NA	NA	NA
XLOC_035175	XLOC_035175	LOC_Os04g54080	Chr4:32228920-32233640	0.31724	2.82283	3.15349	2.86635	0.013	0.316912	no	serine/threonine-protein kinase receptor precursor, putative, expressed	GO:0016301; GO:0000166; GO:0030246; GO:0009875; GO:0006464; GO:0005886	molecular_function; molecular_function; molecular_function; biological_process; biological_process; cellular_component	kinase activity; nucleotide binding; carbohydrate binding; pollen-pistil interaction; protein modification process; plasma membrane	TAIR:AT4G21390; TAIR:AT4G21390; TAIR:AT4G21390; TAIR:AT4G21390; TAIR:AT4G21390; TAIR:AT4G21390	PF00069.18	Pkinase	Domain	IPR001480	Curculin-like (mannose-binding) lectin	Molecular Function: sugar binding (GO:0005529)	NA	NA	NA	NA	LOC_Os04g54080	NA	NA	NA	NA	NA	NA	NA	NA
XLOC_035191	XLOC_035191	LOC_Os04g54310	Chr4:32331271-32337959	6.28965	25.3821	2.01276	2.11347	0.0484	0.603716	no	expressed protein	GO:0006950; GO:0003674	biological_process; molecular_function	response to stress; molecular_function	TAIR:AT4G10270; TAIR:AT4G10270	PF12609.1	DUF3774	Family	N/A	N/A	N/A	NA	NA	NA	NA	LOC_Os04g54310	NA	NA	NA	NA	NA	NA	NA	NA
XLOC_035290	XLOC_035290	LOC_Os04g56100	Chr4:33415313-33416123	0.996882	7.16428	2.84533	2.58635	0.0389	0.550511	no	one cut domain family member 3, putative, expressed	NA	NA	NA	NA	NA	NA	NA	N/A	N/A	N/A	NA	NA	NA	NA	LOC_Os04g56100	NA	NA	NA	NA	NA	NA	NA	NA
XLOC_035331	XLOC_035331	LOC_Os04g56910	Chr4:33928677-33930683	0.268565	10.552	5.2961	4.84499	0.0385	0.548788	no	transferase family protein, putative, expressed	GO:0016740; GO:0008152; GO:0009058; GO:0009987; GO:0019748; GO:0005829; GO:0008150	molecular_function; biological_process; biological_process; biological_process; biological_process; cellular_component; biological_process	transferase activity; metabolic process; biosynthetic process; cellular process; secondary metabolic process; cytosol; biological_process	TAIR:AT5G48930; TAIR:AT5G48930; TAIR:AT5G48930; TAIR:AT5G48930; TAIR:AT5G48930; TAIR:AT5G48930; TAIR:AT5G48930	PF02458.8	Transferase	Family	N/A	N/A	N/A	NA	NA	NA	NA	LOC_Os04g56910	NA	NA	NA	NA	NA	NA	NA	NA
XLOC_035413	XLOC_035413	LOC_Os04g58280	Chr4:34605193-34869593	4.53914	135.377	4.89842	1.01279	0.0103	0.284379	no	stem-specific protein TSJT1, putative, expressed	GO:0003674; GO:0005634; GO:0005575; GO:0005829; GO:0008150; GO:0005886; GO:0003674; GO:0005634; GO:0005575; GO:0005829; GO:0008150; GO:0005886	molecular_function; cellular_component; cellular_component; cellular_component; biological_process; cellular_component; molecular_function; cellular_component; cellular_component; cellular_component; biological_process; cellular_component	molecular_function; nucleus; cellular_component; cytosol; biological_process; plasma membrane; molecular_function; nucleus; cellular_component; cytosol; biological_process; plasma membrane	TAIR:AT4G27450; TAIR:AT4G27450; TAIR:AT4G27450; TAIR:AT4G27450; TAIR:AT4G27450; TAIR:AT4G27450; TAIR:AT4G27450; TAIR:AT4G27450; TAIR:AT4G27450; TAIR:AT4G27450; TAIR:AT4G27450; TAIR:AT4G27450	PF12481.1	DUF3700	Family	N/A	N/A	N/A	NA	NA	NA	NA	LOC_Os04g58280	NA	NA	NA	NA	NA	NA	NA	NA
XLOC_035442	XLOC_035442	LOC_Os04g58734	Chr4:34930156-34932231	1.49964	16.8451	3.48963	3.7408	0.00935	0.271355	no	expressed protein	NA	NA	NA	NA	NA	NA	NA	NA	NA	NA	NA	NA	NA	NA	LOC_Os04g58734	NA	NA	NA	NA	NA	NA	NA	NA
XLOC_035448	XLOC_035448	LOC_Os04g58890	Chr4:35031186-35032646	2.40424	10.343	2.105	2.60691	0.01755	0.376631	no	expressed protein	NA	NA	NA	NA	NA	NA	NA	N/A	N/A	N/A	NA	NA	NA	NA	LOC_Os04g58890	NA	NA	NA	NA	NA	NA	NA	NA
XLOC_035461	XLOC_035461	LOC_Os04g59150	Chr4:35187372-35189338	3.7252	123.689	5.05326	6.76852	5e-05	0.0117035	yes	peroxidase precursor, putative, expressed	GO:0016020; GO:0005488; GO:0005575; GO:0008152; GO:0005773; GO:0006950; GO:0005618; GO:0003824; GO:0016020; GO:0005488; GO:0005575; GO:0008152; GO:0005773; GO:0006950; GO:0005618; GO:0003824	cellular_component; molecular_function; cellular_component; biological_process; cellular_component; biological_process; cellular_component; molecular_function; cellular_component; molecular_function; cellular_component; biological_process; cellular_component; biological_process; cellular_component; molecular_function	membrane; binding; cellular_component; metabolic process; vacuole; response to stress; cell wall; catalytic activity; membrane; binding; cellular_component; metabolic process; vacuole; response to stress; cell wall; catalytic activity	TAIR:AT1G71695; TAIR:AT1G71695; TAIR:AT1G71695; TAIR:AT1G71695; TAIR:AT1G71695; TAIR:AT1G71695; TAIR:AT1G71695; TAIR:AT1G71695; TAIR:AT1G71695; TAIR:AT1G71695; TAIR:AT1G71695; TAIR:AT1G71695; TAIR:AT1G71695; TAIR:AT1G71695; TAIR:AT1G71695; TAIR:AT1G71695	PF00141.16	peroxidase	Family	IPR002016	Haem peroxidase, plant/fungal/bacterial	Molecular Function: peroxidase activity (GO:0004601), Biological Process: response to oxidative stress (GO:0006979), Molecular Function: heme binding (GO:0020037), Biological Process: oxidation reduction (GO:0055114)	NA	NA	NA	NA	LOC_Os04g59150	NA	NA	NA	NA	NA	NA	NA	NA
XLOC_035464	XLOC_035464	LOC_Os04g59190	Chr4:35207043-35208653	0.762119	50.0096	6.03605	6.35428	0.00595	0.211814	no	peroxidase precursor, putative, expressed	GO:0016020; GO:0005488; GO:0005575; GO:0008152; GO:0005773; GO:0006950; GO:0005618; GO:0003824	cellular_component; molecular_function; cellular_component; biological_process; cellular_component; biological_process; cellular_component; molecular_function	membrane; binding; cellular_component; metabolic process; vacuole; response to stress; cell wall; catalytic activity	TAIR:AT1G71695; TAIR:AT1G71695; TAIR:AT1G71695; TAIR:AT1G71695; TAIR:AT1G71695; TAIR:AT1G71695; TAIR:AT1G71695; TAIR:AT1G71695	PF00141.16	peroxidase	Family	N/A	N/A	N/A	NA	NA	NA	NA	LOC_Os04g59190	NA	NA	NA	NA	NA	NA	NA	NA
XLOC_035465	XLOC_035465	LOC_Os04g59200	Chr4:35215123-35216756	3.30153	208.201	5.97869	7.27472	5e-05	0.0117035	yes	peroxidase precursor, putative, expressed	GO:0016020; GO:0005488; GO:0005575; GO:0008152; GO:0005773; GO:0006950; GO:0005618; GO:0003824	cellular_component; molecular_function; cellular_component; biological_process; cellular_component; biological_process; cellular_component; molecular_function	membrane; binding; cellular_component; metabolic process; vacuole; response to stress; cell wall; catalytic activity	TAIR:AT1G71695; TAIR:AT1G71695; TAIR:AT1G71695; TAIR:AT1G71695; TAIR:AT1G71695; TAIR:AT1G71695; TAIR:AT1G71695; TAIR:AT1G71695	PF00141.16	peroxidase	Family	IPR000823	Plant peroxidase	Molecular Function: peroxidase activity (GO:0004601), Biological Process: response to oxidative stress (GO:0006979), Molecular Function: heme binding (GO:0020037), Biological Process: oxidation reduction (GO:0055114)	NA	NA	NA	NA	LOC_Os04g59200	NA	NA	NA	NA	NA	NA	NA	NA
XLOC_035671	XLOC_035671	LOC_Os05g04584	Chr5:2143788-2150279	1.58205	25.7703	4.02584	4.90643	0.0012	0.0895346	no	transferase family protein, putative, expressed	GO:0005575; GO:0008152; GO:0016740; GO:0008150	cellular_component; biological_process; molecular_function; biological_process	cellular_component; metabolic process; transferase activity; biological_process	TAIR:AT3G62160; TAIR:AT3G62160; TAIR:AT3G62160; TAIR:AT3G62160	PF02458.8	Transferase	Family	N/A	N/A	N/A	NA	NA	NA	NA	LOC_Os05g04584	NA	NA	NA	NA	NA	NA	NA	NA
XLOC_035716	XLOC_035716	LOC_Os05g05680	Chr5:2825322-2826992	9.18323	88.53	3.26909	4.90047	5e-05	0.0117035	yes	1-aminocyclopropane-1-carboxylate oxidase, putative, expressed	GO:0009058; GO:0009987; GO:0005575; GO:0003824; GO:0008152	biological_process; biological_process; cellular_component; molecular_function; biological_process	biosynthetic process; cellular process; cellular_component; catalytic activity; metabolic process	TAIR:AT1G77330; TAIR:AT1G77330; TAIR:AT1G77330; TAIR:AT1G77330; TAIR:AT1G77330	PF03171.13	2OG-FeII_Oxy	Domain	N/A	N/A	N/A	NA	NA	NA	NA	LOC_Os05g05680	ETHYL-PWY	ethylene biosynthesis I (plants)	ETHYL-RXN	EC-1.14.17.4	GN7F-22508-MONOMER		GN7F-22508	LOC_Os01g39860.1
XLOC_035827	XLOC_035827	LOC_Os05g07940	Chr5:4301396-4308839	7.66437	137.827	4.16855	5.73142	5e-05	0.0117035	yes	glyoxalase family protein, putative, expressed	GO:0003824; GO:0005975; GO:0003824; GO:0005975; GO:0003824; GO:0005975; GO:0003824; GO:0005975; GO:0003824; GO:0005975	molecular_function; biological_process; molecular_function; biological_process; molecular_function; biological_process; molecular_function; biological_process; molecular_function; biological_process	catalytic activity; carbohydrate metabolic process; catalytic activity; carbohydrate metabolic process; catalytic activity; carbohydrate metabolic process; catalytic activity; carbohydrate metabolic process; catalytic activity; carbohydrate metabolic process	TAIR:AT1G80160; TAIR:AT1G80160; TAIR:AT1G80160; TAIR:AT1G80160; TAIR:AT1G80160; TAIR:AT1G80160; TAIR:AT1G80160; TAIR:AT1G80160; TAIR:AT1G15380; TAIR:AT1G15380	PF00903.18	Glyoxalase	Domain	N/A	N/A	N/A	NA	NA	NA	NA	LOC_Os05g07940	NA	NA	NA	NA	NA	NA	NA	NA
XLOC_035858	XLOC_035858	LOC_Os05g08620	Chr5:4722805-4723462	2.90621	16.967	2.54552	2.65755	0.03145	0.495298	no	expressed protein	GO:0003674; GO:0005575; GO:0007275	molecular_function; cellular_component; biological_process	molecular_function; cellular_component; multicellular organismal development	TAIR:AT4G13395; TAIR:AT4G13395; TAIR:AT4G13395	PF08137.5	DVL	Family	N/A	N/A	N/A	NA	NA	NA	NA	LOC_Os05g08620	NA	NA	NA	NA	NA	NA	NA	NA
XLOC_035905	XLOC_035905	LOC_Os05g09580	Chr5:5414936-5415206	6.36569	37.8967	2.57368	2.41775	0.04855	0.604874	no	expressed protein	NA	NA	NA	NA	NA	NA	NA	N/A	N/A	N/A	NA	NA	NA	NA	LOC_Os05g09580	NA	NA	NA	NA	NA	NA	NA	NA
XLOC_036567	XLOC_036567	LOC_Os05g25390	Chr5:14749755-14754270	0.382273	3.52783	3.20611	3.09373	0.02335	0.431592	no	tyrosine protein kinase domain containing protein, putative, expressed	GO:0008152; GO:0009987; GO:0016301; GO:0006464	biological_process; biological_process; molecular_function; biological_process	metabolic process; cellular process; kinase activity; protein modification process	TAIR:AT5G02070; TAIR:AT5G02070; TAIR:AT5G02070; TAIR:AT5G02070	PF00069.18	Pkinase	Domain	IPR000719	Protein kinase, catalytic domain	Molecular Function: protein kinase activity (GO:0004672), Molecular Function: ATP binding (GO:0005524), Biological Process: protein amino acid phosphorylation (GO:0006468)	NA	NA	NA	NA	LOC_Os05g25390	NA	NA	NA	NA	NA	NA	NA	NA
XLOC_036588	XLOC_036588	LOC_Os05g25770	Chr5:14991578-14993800	13.7189	55.8604	2.02566	3.16536	0.00355	0.165604	no	WRKY45, expressed	GO:0008150; GO:0005730; GO:0009058; GO:0006139; GO:0003700	biological_process; cellular_component; biological_process; biological_process; molecular_function	biological_process; nucleolus; biosynthetic process; nucleobase, nucleoside, nucleotide and nucleic acid metabolic process; sequence-specific DNA binding transcription factor activity	TAIR:AT2G46400; TAIR:AT2G46400; TAIR:AT2G46400; TAIR:AT2G46400; TAIR:AT2G46400	PF03106.8	WRKY	Domain	N/A	N/A	N/A	NA	NA	NA	NA	LOC_Os05g25770	NA	NA	NA	NA	NA	NA	NA	NA
XLOC_036602	XLOC_036602	LOC_Os05g26040	Chr5:15046729-15316792	18.4568	129.418	2.80981	2.76945	0.01095	0.293591	no	pumilio-family RNA binding repeat containing protein, expressed	GO:0003677; GO:0005575; GO:0008150; GO:0005515	molecular_function; cellular_component; biological_process; molecular_function	DNA binding; cellular_component; biological_process; protein binding	TAIR:AT3G22220; TAIR:AT3G22220; TAIR:AT3G22220; TAIR:AT3G22220	PF04937.8	DUF659	Family	IPR001313	Pumilio RNA-binding repeat	Molecular Function: RNA binding (GO:0003723)	NA	NA	NA	NA	LOC_Os05g26040	NA	NA	NA	NA	NA	NA	NA	NA
XLOC_036682	XLOC_036682	LOC_Os05g27660,LOC_Os05g27670	Chr5:16107758-16124785	2.96314	15.6001	2.39636	2.72991	0.0144	0.335134	no	expressed protein	GO:0008150; GO:0009536	biological_process; cellular_component	biological_process; plastid	TAIR:AT5G05360; TAIR:AT5G05360	NA	NA	NA	N/A	N/A	N/A	NA	NA	NA	NA	LOC_Os05g27660	NA	NA	NA	NA	NA	NA	NA	NA
XLOC_036729	XLOC_036729	LOC_Os05g28740	Chr5:16859682-16860977	35.3886	219.416	2.63232	4.08261	0.00015	0.0255145	yes	universal stress protein domain containing protein, putative, expressed	GO:0003674; GO:0006950; GO:0005773	molecular_function; biological_process; cellular_component	molecular_function; response to stress; vacuole	TAIR:AT3G62550; TAIR:AT3G62550; TAIR:AT3G62550	PF00582.19	Usp	Domain	N/A	N/A	N/A	NA	NA	NA	NA	LOC_Os05g28740	NA	NA	NA	NA	NA	NA	NA	NA
XLOC_036826	XLOC_036826	LOC_Os05g31160	Chr5:18126332-18129842	0.603831	6.40747	3.40754	3.0101	0.009	0.264353	no	peptide chain release factor 2, putative, expressed	GO:0016043; GO:0006412; GO:0003677; GO:0006139; GO:0003723; GO:0008135; GO:0009536; GO:0016043; GO:0006412; GO:0003677; GO:0006139; GO:0003723; GO:0008135; GO:0009536	biological_process; biological_process; molecular_function; biological_process; molecular_function; molecular_function; cellular_component; biological_process; biological_process; molecular_function; biological_process; molecular_function; molecular_function; cellular_component	cellular component organization; translation; DNA binding; nucleobase, nucleoside, nucleotide and nucleic acid metabolic process; RNA binding; translation factor activity, nucleic acid binding; plastid; cellular component organization; translation; DNA binding; nucleobase, nucleoside, nucleotide and nucleic acid metabolic process; RNA binding; translation factor activity, nucleic acid binding; pl…	TAIR:AT3G57190; TAIR:AT3G57190; TAIR:AT3G57190; TAIR:AT3G57190; TAIR:AT3G57190; TAIR:AT3G57190; TAIR:AT3G57190; TAIR:AT3G57190; TAIR:AT3G57190; TAIR:AT3G57190; TAIR:AT3G57190; TAIR:AT3G57190; TAIR:AT3G57190; TAIR:AT3G57190	PF00472.13	RF-1	Family	IPR000352	Class I peptide chain release factor	Molecular Function: translation release factor activity (GO:0003747), Biological Process: translational termination (GO:0006415)	NA	NA	NA	NA	LOC_Os05g31160	NA	NA	NA	NA	NA	NA	NA	NA
XLOC_037072	XLOC_037072	LOC_Os05g36040	Chr5:21337041-21340730	0.292437	1.869	2.67607	2.39475	0.0491	0.607435	no	retrotransposon protein, putative, unclassified, expressed	NA	NA	NA	NA	PF03732.10	Retrotrans_gag	Family	IPR005162	Retrotransposon gag protein	N/A	NA	NA	NA	NA	LOC_Os05g36040	LIPASYN-PWY	phospholipases	PHOSPHOLIPASE-C-RXN	EC-3.1.4.3	GN7F-32653-MONOMER	phospholipase C	GN7F-32653	ChrSy.fgenesh.mRNA.4
XLOC_037207	XLOC_037207	LOC_Os05g39260	Chr5:23020499-23021809	0.428267	9.53273	4.47631	4.03071	0.0385	0.548788	no	zinc finger, C3HC4 type domain containing protein, expressed	GO:0005488	molecular_function	binding	TAIR:AT3G11110	PF00097.18	zf-C3HC4	Domain	IPR001841	Zinc finger, RING-type	Molecular Function: protein binding (GO:0005515), Molecular Function: zinc ion binding (GO:0008270)	NA	NA	NA	NA	LOC_Os05g39260	NA	NA	NA	NA	NA	NA	NA	NA
XLOC_037430	XLOC_037430	LOC_Os05g44100	Chr5:25641594-25646417	10.6245	42.8133	2.01066	3.15119	0.00245	0.135997	no	trehalose synthase, putative, expressed	GO:0016787; GO:0016740; GO:0009058; GO:0005975; GO:0009987; GO:0008152; GO:0005829	molecular_function; molecular_function; biological_process; biological_process; biological_process; biological_process; cellular_component	hydrolase activity; transferase activity; biosynthetic process; carbohydrate metabolic process; cellular process; metabolic process; cytosol	TAIR:AT1G06410; TAIR:AT1G06410; TAIR:AT1G06410; TAIR:AT1G06410; TAIR:AT1G06410; TAIR:AT1G06410; TAIR:AT1G06410	PF00982.14	Glyco_transf_20	Family	IPR003337	Trehalose-phosphatase	Molecular Function: catalytic activity (GO:0003824), Biological Process: trehalose biosynthetic process (GO:0005992)	NA	NA	NA	NA	LOC_Os05g44100	TRESYN-PWY	trehalose biosynthesis I	TREHALOSE6PSYN-RXN	EC-2.4.1.15	GN7F-23644-MONOMER		GN7F-23644	LOC_Os09g20990.1
XLOC_037549	XLOC_037549	LOC_Os05g46020	Chr5:26682471-26684208	1.47812	9.72679	2.7182	3.08397	0.0106	0.288298	no	WRKY7, expressed	GO:0006950; GO:0009607; GO:0009719; GO:0007165; GO:0005515; GO:0009058; GO:0006139; GO:0003700	biological_process; biological_process; biological_process; biological_process; molecular_function; biological_process; biological_process; molecular_function	response to stress; response to biotic stimulus; response to endogenous stimulus; signal transduction; protein binding; biosynthetic process; nucleobase, nucleoside, nucleotide and nucleic acid metabolic process; sequence-specific DNA binding transcription factor activity	TAIR:AT5G26170; TAIR:AT5G26170; TAIR:AT5G26170; TAIR:AT5G26170; TAIR:AT5G26170; TAIR:AT5G26170; TAIR:AT5G26170; TAIR:AT5G26170	PF03106.8	WRKY	Domain	N/A	N/A	N/A	NA	NA	NA	NA	LOC_Os05g46020	NA	NA	NA	NA	NA	NA	NA	NA
XLOC_037655	XLOC_037655	LOC_Os05g48340	Chr5:27712349-27717899	2.24173	10.6187	2.24393	2.98758	0.007	0.23	no	proteasome-related, putative, expressed	GO:0016020; GO:0005773; GO:0005575; GO:0008150; GO:0005488; GO:0016020; GO:0005773; GO:0005575; GO:0008150; GO:0005488; GO:0016020; GO:0005773; GO:0005575; GO:0008150; GO:0005488	cellular_component; cellular_component; cellular_component; biological_process; molecular_function; cellular_component; cellular_component; cellular_component; biological_process; molecular_function; cellular_component; cellular_component; cellular_component; biological_process; molecular_function	membrane; vacuole; cellular_component; biological_process; binding; membrane; vacuole; cellular_component; biological_process; binding; membrane; vacuole; cellular_component; biological_process; binding	TAIR:AT3G15180; TAIR:AT3G15180; TAIR:AT3G15180; TAIR:AT3G15180; TAIR:AT3G15180; TAIR:AT3G15180; TAIR:AT3G15180; TAIR:AT3G15180; TAIR:AT3G15180; TAIR:AT3G15180; TAIR:AT3G15180; TAIR:AT3G15180; TAIR:AT3G15180; TAIR:AT3G15180; TAIR:AT3G15180	PF10508.2	Proteasom_PSMB	Family	N/A	N/A	N/A	NA	NA	NA	NA	LOC_Os05g48340	NA	NA	NA	NA	NA	NA	NA	NA
XLOC_038194	XLOC_038194	LOC_Os05g08420	Chr5:4593196-4594041	8.26565	74.1453	3.16515	4.30297	5e-05	0.0117035	yes	expressed protein	GO:0003674; GO:0008150	molecular_function; biological_process	molecular_function; biological_process	TAIR:AT3G15630; TAIR:AT3G15630	NA	NA	NA	N/A	N/A	N/A	NA	NA	NA	NA	LOC_Os05g08420	NA	NA	NA	NA	NA	NA	NA	NA
XLOC_038210	XLOC_038210	LOC_Os05g08750	Chr5:4799110-4800891	1.52689	8.69863	2.51019	2.97188	0.0128	0.314063	no	UDP-glucoronosyl and UDP-glucosyl transferase domain containing protein, expressed	GO:0016740; GO:0008152; GO:0009987; GO:0016043; GO:0007049; GO:0008150; GO:0005737; GO:0005515	molecular_function; biological_process; biological_process; biological_process; biological_process; biological_process; cellular_component; molecular_function	transferase activity; metabolic process; cellular process; cellular component organization; cell cycle; biological_process; cytoplasm; protein binding	TAIR:AT1G05560; TAIR:AT1G05560; TAIR:AT1G05560; TAIR:AT1G05560; TAIR:AT1G05560; TAIR:AT1G05560; TAIR:AT1G05560; TAIR:AT1G05560	PF00201.11	UDPGT	Family	IPR002213	UDP-glucuronosyl/UDP-glucosyltransferase	Biological Process: metabolic process (GO:0008152), Molecular Function: transferase activity, transferring hexosyl groups (GO:0016758)	NA	NA	NA	NA	LOC_Os05g08750	NA	NA	NA	NA	NA	NA	NA	NA
XLOC_038226	XLOC_038226	LOC_Os05g09020	Chr5:4998001-4999629	4.55922	34.318	2.91211	3.65354	0.0027	0.14326	no	WRKY67, expressed	GO:0006950; GO:0009607; GO:0009719; GO:0007165; GO:0005515; GO:0009058; GO:0006139; GO:0003700; GO:0006950; GO:0009607; GO:0009719; GO:0007165; GO:0005515; GO:0009058; GO:0006139; GO:0003700	biological_process; biological_process; biological_process; biological_process; molecular_function; biological_process; biological_process; molecular_function; biological_process; biological_process; biological_process; biological_process; molecular_function; biological_process; biological_process; molecular_function	response to stress; response to biotic stimulus; response to endogenous stimulus; signal transduction; protein binding; biosynthetic process; nucleobase, nucleoside, nucleotide and nucleic acid metabolic process; sequence-specific DNA binding transcription factor activity; response to stress; response to biotic stimulus; response to endogenous stimulus; signal transduction; protein binding; biosy…	TAIR:AT5G26170; TAIR:AT5G26170; TAIR:AT5G26170; TAIR:AT5G26170; TAIR:AT5G26170; TAIR:AT5G26170; TAIR:AT5G26170; TAIR:AT5G26170; TAIR:AT5G26170; TAIR:AT5G26170; TAIR:AT5G26170; TAIR:AT5G26170; TAIR:AT5G26170; TAIR:AT5G26170; TAIR:AT5G26170; TAIR:AT5G26170	PF03106.8	WRKY	Domain	N/A	N/A	N/A	NA	NA	NA	NA	LOC_Os05g09020	NA	NA	NA	NA	NA	NA	NA	NA
XLOC_038250	XLOC_038250	LOC_Os05g09500	Chr5:5337194-5341210	1.82615	10.9834	2.58845	3.25347	0.0054	0.202596	no	hexokinase, putative, expressed	GO:0019725; GO:0007165; GO:0016020; GO:0000166; GO:0005515; GO:0005488; GO:0005739; GO:0005634; GO:0005975; GO:0009987; GO:0016301; GO:0005773; GO:0009056; GO:0008219; GO:0009536	biological_process; biological_process; cellular_component; molecular_function; molecular_function; molecular_function; cellular_component; cellular_component; biological_process; biological_process; molecular_function; cellular_component; biological_process; biological_process; cellular_component	cellular homeostasis; signal transduction; membrane; nucleotide binding; protein binding; binding; mitochondrion; nucleus; carbohydrate metabolic process; cellular process; kinase activity; vacuole; catabolic process; cell death; plastid	TAIR:AT4G29130; TAIR:AT4G29130; TAIR:AT4G29130; TAIR:AT4G29130; TAIR:AT4G29130; TAIR:AT4G29130; TAIR:AT4G29130; TAIR:AT4G29130; TAIR:AT4G29130; TAIR:AT4G29130; TAIR:AT4G29130; TAIR:AT4G29130; TAIR:AT4G29130; TAIR:AT4G29130; TAIR:AT4G29130	PF00349.14	Hexokinase_1	Domain	IPR001312	Hexokinase	Molecular Function: ATP binding (GO:0005524), Biological Process: carbohydrate metabolic process (GO:0005975), Molecular Function: phosphotransferase activity, alcohol group as acceptor (GO:0016773)	Q1WM16	4338010;	NP_001054835.1;	osa:4338010;	LOC_Os05g09500	NA	NA	NA	NA	NA	NA	NA	NA
XLOC_038521	XLOC_038521	LOC_Os05g15770	Chr5:8901167-8903795	11.662	65.9221	2.49895	3.83736	0.0011	0.0860799	no	glycosyl hydrolase, putative, expressed	GO:0006950; GO:0008152; GO:0009628; GO:0003824; GO:0005623; GO:0005488; GO:0016787; GO:0009991; GO:0007154	biological_process; biological_process; biological_process; molecular_function; cellular_component; molecular_function; molecular_function; biological_process; biological_process	response to stress; metabolic process; response to abiotic stimulus; catalytic activity; cell; binding; hydrolase activity; response to extracellular stimulus; cell communication	TAIR:AT5G24090; TAIR:AT5G24090; TAIR:AT5G24090; TAIR:AT5G24090; TAIR:AT5G24090; TAIR:AT5G24090; TAIR:AT5G24090; TAIR:AT5G24090; TAIR:AT5G24090	PF00704.21	Glyco_hydro_18	Domain	IPR013781	Glycoside hydrolase, subgroup, catalytic core	Molecular Function: catalytic activity (GO:0003824), Biological Process: carbohydrate metabolic process (GO:0005975), Molecular Function: cation binding (GO:0043169)	NA	NA	NA	NA	LOC_Os05g15770	PWY-6902	chitin degradation II	3.2.1.14-RXN	EC-3.2.1.14	GN7F-19151-MONOMER	chitinase	GN7F-19151	LOC_Os01g47070.1
XLOC_038618	XLOC_038618	LOC_Os05g17604	Chr5:10112348-10126224	0.791872	15.3103	4.27309	3.38204	0.00265	0.141888	no	SHR5-receptor-like kinase, putative, expressed	GO:0016020; GO:0016301; GO:0000166; GO:0006464; GO:0005886; GO:0016301; GO:0000166; GO:0006464; GO:0005886; GO:0016301; GO:0000166; GO:0006464; GO:0005886; GO:0016301; GO:0000166; GO:0005575; GO:0006464; GO:0005886; GO:0016301; GO:0000166; GO:0005575; GO:0006464; GO:0005886; GO:0016301; GO:0000166; GO:0005575; GO:0006464; GO:0005886	cellular_component; molecular_function; molecular_function; biological_process; cellular_component; molecular_function; molecular_function; biological_process; cellular_component; molecular_function; molecular_function; biological_process; cellular_component; molecular_function; molecular_function; cellular_component; biological_process; cellular_component; molecular_function; molecular_function;…	membrane; kinase activity; nucleotide binding; protein modification process; plasma membrane; kinase activity; nucleotide binding; protein modification process; plasma membrane; kinase activity; nucleotide binding; protein modification process; plasma membrane; kinase activity; nucleotide binding; cellular_component; protein modification process; plasma membrane; kinase activity; nucleotide bindi…	TAIR:AT1G56130; TAIR:AT1G56130; TAIR:AT1G56130; TAIR:AT1G56130; TAIR:AT1G56130; TAIR:AT1G56140; TAIR:AT1G56140; TAIR:AT1G56140; TAIR:AT1G56140; TAIR:AT1G56140; TAIR:AT1G56140; TAIR:AT1G56140; TAIR:AT1G56140; TAIR:AT1G56145; TAIR:AT1G56145; TAIR:AT1G56145; TAIR:AT1G56145; TAIR:AT1G56145; TAIR:AT1G56145; TAIR:AT1G56145; TAIR:AT1G56145; TAIR:AT1G56145; TAIR:AT1G56145; TAIR:AT1G56145; TAIR:AT1G56145;…	PF00560.26	LRR_1	Repeat	N/A	N/A	N/A	NA	NA	NA	NA	LOC_Os05g17604	NA	NA	NA	NA	NA	NA	NA	NA
XLOC_038718	XLOC_038718	LOC_Os05g19910	Chr5:11609439-11615022	1.48528	11.4755	2.94975	3.49963	0.00575	0.208482	no	transferase family protein, putative, expressed	GO:0005575; GO:0008152; GO:0016740; GO:0008150	cellular_component; biological_process; molecular_function; biological_process	cellular_component; metabolic process; transferase activity; biological_process	TAIR:AT3G62160; TAIR:AT3G62160; TAIR:AT3G62160; TAIR:AT3G62160	PF02458.8	Transferase	Family	N/A	N/A	N/A	NA	NA	NA	NA	LOC_Os05g19910	NA	NA	NA	NA	NA	NA	NA	NA
XLOC_039068	XLOC_039068	LOC_Os05g27780	Chr5:16178541-16179709	12.9973	122.715	3.23903	4.85973	5e-05	0.0117035	yes	expressed protein	GO:0009628; GO:0006950; GO:0005515; GO:0009607; GO:0005737	biological_process; biological_process; molecular_function; biological_process; cellular_component	response to abiotic stimulus; response to stress; protein binding; response to biotic stimulus; cytoplasm	TAIR:AT2G41430; TAIR:AT2G41430; TAIR:AT2G41430; TAIR:AT2G41430; TAIR:AT2G41430	NA	NA	NA	N/A	N/A	N/A	NA	NA	NA	NA	LOC_Os05g27780	NA	NA	NA	NA	NA	NA	NA	NA
XLOC_039151	XLOC_039151	LOC_Os05g30010	Chr5:17361508-17368926	0.284338	2.83672	3.31854	3.45503	0.02705	0.465348	no	WD domain, G-beta repeat domain containing protein, expressed	GO:0005575; GO:0000166; GO:0005488	cellular_component; molecular_function; molecular_function	cellular_component; nucleotide binding; binding	TAIR:AT3G06880; TAIR:AT3G06880; TAIR:AT3G06880	PF00400.25	WD40	Repeat	N/A	N/A	N/A	NA	NA	NA	NA	LOC_Os05g30010	NA	NA	NA	NA	NA	NA	NA	NA
XLOC_039390	XLOC_039390	LOC_Os05g34854	Chr5:20685345-20692274	0.225162	4.30282	4.25625	3.53526	0.00495	0.193583	no	gibberellin 20 oxidase 2, putative, expressed	GO:0016043; GO:0009653; GO:0016049; GO:0003824; GO:0009719; GO:0008152; GO:0005737; GO:0009058; GO:0009987; GO:0006629; GO:0000003; GO:0009628; GO:0009791; GO:0009908; GO:0007165; GO:0007275; GO:0016043; GO:0009653; GO:0016049; GO:0003824; GO:0009719; GO:0008152; GO:0005737; GO:0009058; GO:0009987; GO:0006629; GO:0000003; GO:0009628; GO:0009791; GO:0009908; GO:0007165; GO:0007275	biological_process; biological_process; biological_process; molecular_function; biological_process; biological_process; cellular_component; biological_process; biological_process; biological_process; biological_process; biological_process; biological_process; biological_process; biological_process; biological_process; biological_process; biological_process; biological_process; molecular_function;…	cellular component organization; anatomical structure morphogenesis; cell growth; catalytic activity; response to endogenous stimulus; metabolic process; cytoplasm; biosynthetic process; cellular process; lipid metabolic process; reproduction; response to abiotic stimulus; post-embryonic development; flower development; signal transduction; multicellular organismal development; cellular component…	TAIR:AT4G25420; TAIR:AT4G25420; TAIR:AT4G25420; TAIR:AT4G25420; TAIR:AT4G25420; TAIR:AT4G25420; TAIR:AT4G25420; TAIR:AT4G25420; TAIR:AT4G25420; TAIR:AT4G25420; TAIR:AT4G25420; TAIR:AT4G25420; TAIR:AT4G25420; TAIR:AT4G25420; TAIR:AT4G25420; TAIR:AT4G25420; TAIR:AT4G25420; TAIR:AT4G25420; TAIR:AT4G25420; TAIR:AT4G25420; TAIR:AT4G25420; TAIR:AT4G25420; TAIR:AT4G25420; TAIR:AT4G25420; TAIR:AT4G25420;…	PF03171.13	2OG-FeII_Oxy	Domain	N/A	N/A	N/A	NA	NA	NA	NA	LOC_Os05g34854	NA	NA	NA	NA	NA	NA	NA	NA
XLOC_039408	XLOC_039408	LOC_Os05g35290	Chr5:20953409-20955923	2.18144	11.7586	2.43036	3.3473	0.0025	0.13776	no	phenylalanine ammonia-lyase, putative, expressed	GO:0009056; GO:0009987; GO:0019748; GO:0006950; GO:0003824; GO:0007275; GO:0008152; GO:0009628; GO:0005737; GO:0009058	biological_process; biological_process; biological_process; biological_process; molecular_function; biological_process; biological_process; biological_process; cellular_component; biological_process	catabolic process; cellular process; secondary metabolic process; response to stress; catalytic activity; multicellular organismal development; metabolic process; response to abiotic stimulus; cytoplasm; biosynthetic process	TAIR:AT2G37040; TAIR:AT2G37040; TAIR:AT2G37040; TAIR:AT2G37040; TAIR:AT2G37040; TAIR:AT2G37040; TAIR:AT2G37040; TAIR:AT2G37040; TAIR:AT2G37040; TAIR:AT2G37040	PF00221.12	PAL	Family	IPR005922	Phenylalanine ammonia-lyase	Cellular Component: cytoplasm (GO:0005737), Biological Process: L-phenylalanine catabolic process (GO:0006559), Molecular Function: ammonia-lyase activity (GO:0016841)	NA	NA	NA	NA	LOC_Os05g35290	PWY-6457	<i>trans</i>-cinnamoyl-CoA biosynthesis	PHENYLALANINE-AMMONIA-LYASE-RXN	EC-4.3.1.25	GN7F-20592-MONOMER		GN7F-20592	LOC_Os12g33610.1
XLOC_039433	XLOC_039433	LOC_Os05g35650	Chr5:21171858-21191740	2.37634	10.3739	2.12615	2.83838	0.00655	0.221686	no	peptide transporter PTR2, putative, expressed	GO:0016020; GO:0006810; GO:0005215; GO:0016020; GO:0006810; GO:0005215	cellular_component; biological_process; molecular_function; cellular_component; biological_process; molecular_function	membrane; transport; transporter activity; membrane; transport; transporter activity	TAIR:AT1G22540; TAIR:AT1G22540; TAIR:AT1G22540; TAIR:AT1G22540; TAIR:AT1G22540; TAIR:AT1G22540	PF00854.14	PTR2	Family	N/A	N/A	N/A	NA	NA	NA	NA	LOC_Os05g35650	NA	NA	NA	NA	NA	NA	NA	NA
XLOC_039501	XLOC_039501	LOC_Os05g37520	Chr5:21963762-21966012	0.672578	11.4739	4.09251	4.18531	0.0037	0.169757	no	expressed protein	GO:0005488; GO:0005488	molecular_function; molecular_function	binding; binding	TAIR:AT2G29670; TAIR:AT2G29670	NA	NA	NA	N/A	N/A	N/A	NA	NA	NA	NA	LOC_Os05g37520	NA	NA	NA	NA	NA	NA	NA	NA
XLOC_039611	XLOC_039611	LOC_Os05g39720	Chr5:23310473-23313449	0.318311	3.62286	3.50862	3.17655	0.02325	0.430948	no	WRKY70, expressed	GO:0006950; GO:0009628; GO:0009058; GO:0006139; GO:0009607; GO:0009987; GO:0008150; GO:0005515; GO:0003700; GO:0019748; GO:0005634; GO:0009056	biological_process; biological_process; biological_process; biological_process; biological_process; biological_process; biological_process; molecular_function; molecular_function; biological_process; cellular_component; biological_process	response to stress; response to abiotic stimulus; biosynthetic process; nucleobase, nucleoside, nucleotide and nucleic acid metabolic process; response to biotic stimulus; cellular process; biological_process; protein binding; sequence-specific DNA binding transcription factor activity; secondary metabolic process; nucleus; catabolic process	TAIR:AT2G38470; TAIR:AT2G38470; TAIR:AT2G38470; TAIR:AT2G38470; TAIR:AT2G38470; TAIR:AT2G38470; TAIR:AT2G38470; TAIR:AT2G38470; TAIR:AT2G38470; TAIR:AT2G38470; TAIR:AT2G38470; TAIR:AT2G38470	PF03106.8	WRKY	Domain	IPR003657	DNA-binding WRKY	Molecular Function: transcription factor activity (GO:0003700), Molecular Function: sequence-specific DNA binding (GO:0043565), Biological Process: regulation of transcription (GO:0045449)	NA	NA	NA	NA	LOC_Os05g39720	NA	NA	NA	NA	NA	NA	NA	NA
XLOC_039772	XLOC_039772	LOC_Os05g43390	Chr5:25229648-25233242	0.606504	4.62246	2.93007	2.83249	0.01475	0.340286	no	signal recognition particle 54 kDa protein, putative, expressed	GO:0003723; GO:0008152; GO:0005737; GO:0006810; GO:0009987; GO:0005829; GO:0000166; GO:0016787; GO:0016043	molecular_function; biological_process; cellular_component; biological_process; biological_process; cellular_component; molecular_function; molecular_function; biological_process	RNA binding; metabolic process; cytoplasm; transport; cellular process; cytosol; nucleotide binding; hydrolase activity; cellular component organization	TAIR:AT1G48900; TAIR:AT1G48900; TAIR:AT1G48900; TAIR:AT1G48900; TAIR:AT1G48900; TAIR:AT1G48900; TAIR:AT1G48900; TAIR:AT1G48900; TAIR:AT1G48900	PF02978.12	SRP_SPB	Domain	N/A	N/A	N/A	NA	NA	NA	NA	LOC_Os05g43390	NA	NA	NA	NA	NA	NA	NA	NA
XLOC_039835	XLOC_039835	LOC_Os05g45020	Chr5:26171091-26172349	0.896357	7.64576	3.09251	3.1147	0.01685	0.367725	no	zinc finger/CCCH transcription factor, putative, expressed	GO:0009058; GO:0006139; GO:0003700; GO:0003676	biological_process; biological_process; molecular_function; molecular_function	biosynthetic process; nucleobase, nucleoside, nucleotide and nucleic acid metabolic process; sequence-specific DNA binding transcription factor activity; nucleic acid binding	TAIR:AT5G44260; TAIR:AT5G44260; TAIR:AT5G44260; TAIR:AT5G44260	PF00642.17	zf-CCCH	Family	IPR000571	Zinc finger, CCCH-type	Molecular Function: nucleic acid binding (GO:0003676), Molecular Function: zinc ion binding (GO:0008270)	Q65X92	4339379;	NP_001056099.1;	osa:4339379;	LOC_Os05g45020	NA	NA	NA	NA	NA	NA	NA	NA
XLOC_039907	XLOC_039907	LOC_Os05g46460	Chr5:26911205-26917459	37.0816	167.626	2.17647	2.86264	0.006	0.212735	no	hydrolase, alpha/beta fold family domain containing protein, expressed	GO:0008152; GO:0016787; GO:0003824; GO:0008152; GO:0016787; GO:0003824; GO:0008152; GO:0016787; GO:0003824; GO:0008152; GO:0016787; GO:0003824; GO:0008152; GO:0016787; GO:0003824	biological_process; molecular_function; molecular_function; biological_process; molecular_function; molecular_function; biological_process; molecular_function; molecular_function; biological_process; molecular_function; molecular_function; biological_process; molecular_function; molecular_function	metabolic process; hydrolase activity; catalytic activity; metabolic process; hydrolase activity; catalytic activity; metabolic process; hydrolase activity; catalytic activity; metabolic process; hydrolase activity; catalytic activity; metabolic process; hydrolase activity; catalytic activity	TAIR:AT5G53050; TAIR:AT5G53050; TAIR:AT5G53050; TAIR:AT5G53050; TAIR:AT5G53050; TAIR:AT5G53050; TAIR:AT5G53050; TAIR:AT5G53050; TAIR:AT5G53050; TAIR:AT5G53050; TAIR:AT5G53050; TAIR:AT5G53050; TAIR:AT5G53050; TAIR:AT5G53050; TAIR:AT5G53050	PF00561.13	Abhydrolase_1	Domain	IPR000073	Alpha/beta hydrolase fold-1	N/A	NA	NA	NA	NA	LOC_Os05g46460	NA	NA	NA	NA	NA	NA	NA	NA
XLOC_039934	XLOC_039934	LOC_Os05g47660	Chr5:27310839-27314618	0.600255	3.57568	2.57457	2.20237	0.04025	0.560617	no	lipid phosphatase protein, putative, expressed	GO:0009719; GO:0007165; GO:0005886; GO:0016787; GO:0008152; GO:0009987	biological_process; biological_process; cellular_component; molecular_function; biological_process; biological_process	response to endogenous stimulus; signal transduction; plasma membrane; hydrolase activity; metabolic process; cellular process	TAIR:AT1G15080; TAIR:AT1G15080; TAIR:AT1G15080; TAIR:AT1G15080; TAIR:AT1G15080; TAIR:AT1G15080	PF01569.14	PAP2	Family	N/A	N/A	N/A	NA	NA	NA	NA	LOC_Os05g47660	NA	NA	NA	NA	NA	NA	NA	NA
XLOC_039937	XLOC_039937	LOC_Os05g47750	Chr5:27345714-27357619	0.49941	3.32192	2.73372	2.5934	0.02525	0.450954	no	Ser/Thr protein kinase, putative, expressed	GO:0005623; GO:0008152; GO:0009987; GO:0016301; GO:0006464	cellular_component; biological_process; biological_process; molecular_function; biological_process	cell; metabolic process; cellular process; kinase activity; protein modification process	TAIR:AT5G38260; TAIR:AT5G38260; TAIR:AT5G38260; TAIR:AT5G38260; TAIR:AT5G38260	PF07714.10	Pkinase_Tyr	Domain	IPR017441	Protein kinase, ATP binding site	Molecular Function: protein kinase activity (GO:0004672), Molecular Function: ATP binding (GO:0005524), Biological Process: protein amino acid phosphorylation (GO:0006468)	NA	NA	NA	NA	LOC_Os05g47750	NA	NA	NA	NA	NA	NA	NA	NA
XLOC_040004	XLOC_040004	LOC_Os05g49060	Chr5:28128413-28131204	3.66468	26.4764	2.85295	3.80482	0.00195	0.117623	no	uncharacterized protein ycf23, putative, expressed	NA	NA	NA	NA	PF04481.5	DUF561	Family	N/A	N/A	N/A	NA	NA	NA	NA	LOC_Os05g49060	NA	NA	NA	NA	NA	NA	NA	NA
XLOC_040049	XLOC_040049	LOC_Os05g50090	Chr5:28705407-28708645	4.05427	17.113	2.07758	2.82535	0.0085	0.256503	no	oxidoreductase, 2OG-FeII oxygenase domain containing protein, putative, expressed	GO:0008152; GO:0003824	biological_process; molecular_function	metabolic process; catalytic activity	TAIR:AT1G52820; TAIR:AT1G52820	PF03171.13	2OG-FeII_Oxy	Domain	N/A	N/A	N/A	NA	NA	NA	NA	LOC_Os05g50090	NA	NA	NA	NA	NA	NA	NA	NA
XLOC_040057	XLOC_040057	LOC_Os05g50190	Chr5:28760151-28763886	3.51848	25.7682	2.87257	3.95332	0.0006	0.0580256	no	protein kinase domain containing protein, expressed	GO:0005575; GO:0008152; GO:0009987; GO:0016301; GO:0006464	cellular_component; biological_process; biological_process; molecular_function; biological_process	cellular_component; metabolic process; cellular process; kinase activity; protein modification process	TAIR:AT3G01490; TAIR:AT3G01490; TAIR:AT3G01490; TAIR:AT3G01490; TAIR:AT3G01490	PF07714.10	Pkinase_Tyr	Domain	IPR001245	Serine-threonine/tyrosine-protein kinase	Molecular Function: protein kinase activity (GO:0004672), Molecular Function: ATP binding (GO:0005524), Biological Process: protein amino acid phosphorylation (GO:0006468)	NA	NA	NA	NA	LOC_Os05g50190	NA	NA	NA	NA	NA	NA	NA	NA
XLOC_040067	XLOC_040067	LOC_Os05g50380	Chr5:28871793-28877277	0.714638	5.41494	2.92166	2.91685	0.01295	0.316131	no	glucose-1-phosphate adenylyltransferase large subunit, chloroplast precursor, putative, expressed	GO:0009058; GO:0005975; GO:0009987; GO:0005575; GO:0008152; GO:0016740; GO:0009058; GO:0005975; GO:0009987; GO:0005575; GO:0008152; GO:0016740	biological_process; biological_process; biological_process; cellular_component; biological_process; molecular_function; biological_process; biological_process; biological_process; cellular_component; biological_process; molecular_function	biosynthetic process; carbohydrate metabolic process; cellular process; cellular_component; metabolic process; transferase activity; biosynthetic process; carbohydrate metabolic process; cellular process; cellular_component; metabolic process; transferase activity	TAIR:AT1G27680; TAIR:AT1G27680; TAIR:AT1G27680; TAIR:AT1G27680; TAIR:AT1G27680; TAIR:AT1G27680; TAIR:AT1G27680; TAIR:AT1G27680; TAIR:AT1G27680; TAIR:AT1G27680; TAIR:AT1G27680; TAIR:AT1G27680	PF00483.16	NTP_transferase	Family	N/A	N/A	N/A	NA	NA	NA	NA	LOC_Os05g50380	NA	NA	NA	NA	NA	NA	NA	NA
XLOC_040210	XLOC_040210	LOC_Os06g02019	Chr6:580664-586452	0.557749	3.36264	2.5919	2.48629	0.0332	0.510102	no	cytochrome P450, putative, expressed	GO:0005783; GO:0003824; GO:0008152; GO:0019825; GO:0009058; GO:0009987; GO:0006629	cellular_component; molecular_function; biological_process; molecular_function; biological_process; biological_process; biological_process	endoplasmic reticulum; catalytic activity; metabolic process; oxygen binding; biosynthetic process; cellular process; lipid metabolic process	TAIR:AT2G32440; TAIR:AT2G32440; TAIR:AT2G32440; TAIR:AT2G32440; TAIR:AT2G32440; TAIR:AT2G32440; TAIR:AT2G32440	PF00067.15	p450	Domain	IPR002397	Cytochrome P450, B-class	Molecular Function: monooxygenase activity (GO:0004497), Molecular Function: iron ion binding (GO:0005506), Molecular Function: heme binding (GO:0020037), Biological Process: oxidation reduction (GO:0055114)	NA	NA	NA	NA	LOC_Os06g02019	NA	NA	NA	NA	NA	NA	NA	NA
XLOC_040305	XLOC_040305	LOC_Os06g03830	Chr6:1539027-1542212	0.734208	26.0652	5.14979	5.32153	0.00345	0.163097	no	retinol dehydrogenase, putative, expressed	GO:0008152; GO:0003824; GO:0005488; GO:0008152; GO:0003824; GO:0005488	biological_process; molecular_function; molecular_function; biological_process; molecular_function; molecular_function	metabolic process; catalytic activity; binding; metabolic process; catalytic activity; binding	TAIR:AT4G24050; TAIR:AT4G24050; TAIR:AT4G24050; TAIR:AT1G64590; TAIR:AT1G64590; TAIR:AT1G64590	PF00106.18	adh_short	Domain	IPR002198	Short-chain dehydrogenase/reductase SDR	Biological Process: metabolic process (GO:0008152), Molecular Function: oxidoreductase activity (GO:0016491)	NA	NA	NA	NA	LOC_Os06g03830	NA	NA	NA	NA	NA	NA	NA	NA
XLOC_040465	XLOC_040465	LOC_Os06g07030	Chr6:3337082-3338612	8.49519	38.1937	2.16862	2.97316	0.0041	0.179799	no	AP2 domain containing protein, expressed	GO:0003677; GO:0009058; GO:0006139; GO:0003700	molecular_function; biological_process; biological_process; molecular_function	DNA binding; biosynthetic process; nucleobase, nucleoside, nucleotide and nucleic acid metabolic process; sequence-specific DNA binding transcription factor activity	TAIR:AT4G36900; TAIR:AT4G36900; TAIR:AT4G36900; TAIR:AT4G36900	PF00847.13	AP2	Domain	IPR001471	Pathogenesis-related transcriptional factor/ERF, DNA-binding	Molecular Function: transcription factor activity (GO:0003700), Biological Process: regulation of transcription, DNA-dependent (GO:0006355)	NA	NA	NA	NA	LOC_Os06g07030	NA	NA	NA	NA	NA	NA	NA	NA
XLOC_040570	XLOC_040570	LOC_Os06g09260	Chr6:4650879-4652218	0.661495	7.01316	3.40626	2.31839	0.02575	0.454307	no	expressed protein	GO:0003674; GO:0008150	molecular_function; biological_process	molecular_function; biological_process	TAIR:AT5G66650; TAIR:AT5G66650	NA	NA	NA	N/A	N/A	N/A	NA	NA	NA	NA	LOC_Os06g09260	NA	NA	NA	NA	NA	NA	NA	NA
XLOC_040588	XLOC_040588	LOC_Os06g09679	Chr6:4933904-4938500	4.39108	24.9289	2.50517	3.37942	0.00195	0.117623	no	chaperonin, putative, expressed	GO:0005576; GO:0016020; GO:0009536; GO:0009579; GO:0006950; GO:0009628; GO:0008150; GO:0005488; GO:0005739; GO:0005515; GO:0005576; GO:0016020; GO:0009536; GO:0009579; GO:0006950; GO:0009628; GO:0008150; GO:0005488; GO:0005739; GO:0005515; GO:0005576; GO:0016020; GO:0009536; GO:0009579; GO:0006950; GO:0009628; GO:0008150; GO:0005488; GO:0005739; GO:0005515	cellular_component; cellular_component; cellular_component; cellular_component; biological_process; biological_process; biological_process; molecular_function; cellular_component; molecular_function; cellular_component; cellular_component; cellular_component; cellular_component; biological_process; biological_process; biological_process; molecular_function; cellular_component; molecular_function;…	extracellular region; membrane; plastid; thylakoid; response to stress; response to abiotic stimulus; biological_process; binding; mitochondrion; protein binding; extracellular region; membrane; plastid; thylakoid; response to stress; response to abiotic stimulus; biological_process; binding; mitochondrion; protein binding; extracellular region; membrane; plastid; thylakoid; response to stress; r…	TAIR:AT5G20720; TAIR:AT5G20720; TAIR:AT5G20720; TAIR:AT5G20720; TAIR:AT5G20720; TAIR:AT5G20720; TAIR:AT5G20720; TAIR:AT5G20720; TAIR:AT5G20720; TAIR:AT5G20720; TAIR:AT5G20720; TAIR:AT5G20720; TAIR:AT5G20720; TAIR:AT5G20720; TAIR:AT5G20720; TAIR:AT5G20720; TAIR:AT5G20720; TAIR:AT5G20720; TAIR:AT5G20720; TAIR:AT5G20720; TAIR:AT5G20720; TAIR:AT5G20720; TAIR:AT5G20720; TAIR:AT5G20720; TAIR:AT5G20720;…	PF00166.14	Cpn10	Domain	IPR001476	Chaperonin Cpn10, subgroup	Molecular Function: ATP binding (GO:0005524), Cellular Component: cytoplasm (GO:0005737), Biological Process: protein folding (GO:0006457)	NA	NA	NA	NA	LOC_Os06g09679	NA	NA	NA	NA	NA	NA	NA	NA
XLOC_040857	XLOC_040857	LOC_Os06g15280,LOC_Os06g15330	Chr6:8625611-8707264	8.17138	34.9128	2.09511	2.96268	0.0031	0.155294	no	NA	NA	NA	NA	NA	PF10536.2	PMD	Domain	N/A	N/A	N/A	NA	NA	NA	NA	LOC_Os06g15280	NA	NA	NA	NA	NA	NA	NA	NA
XLOC_040861	XLOC_040861	LOC_Os06g15370	Chr6:8739430-8744693	11.412	51.5018	2.17406	3.25319	0.00225	0.129516	no	peptide transporter PTR2, putative, expressed	GO:0016020; GO:0006810; GO:0005215	cellular_component; biological_process; molecular_function	membrane; transport; transporter activity	TAIR:AT1G68570; TAIR:AT1G68570; TAIR:AT1G68570	PF00854.14	PTR2	Family	IPR000109	Oligopeptide transporter	Molecular Function: transporter activity (GO:0005215), Biological Process: oligopeptide transport (GO:0006857), Cellular Component: membrane (GO:0016020)	NA	NA	NA	NA	LOC_Os06g15370	NA	NA	NA	NA	NA	NA	NA	NA
XLOC_041032	XLOC_041032	LOC_Os06g19370	Chr6:11022310-11029576	3.24399	15.1948	2.22773	3.44856	0.001	0.0805175	no	cadmium tolerance factor, putative, expressed	GO:0005575; GO:0008150; GO:0005575; GO:0008150	cellular_component; biological_process; cellular_component; biological_process	cellular_component; biological_process; cellular_component; biological_process	TAIR:AT4G11000; TAIR:AT4G11000; TAIR:AT4G11000; TAIR:AT4G11000	NA	NA	NA	N/A	N/A	N/A	NA	NA	NA	NA	LOC_Os06g19370	NA	NA	NA	NA	NA	NA	NA	NA
XLOC_041067	XLOC_041067	LOC_Os06g20150	Chr6:11559569-11560929	2.6771	39.0794	3.86766	4.93983	0.0007	0.0632991	no	peroxidase precursor, putative, expressed	GO:0005783; GO:0005515; GO:0006950; GO:0009628; GO:0003824; GO:0008152	cellular_component; molecular_function; biological_process; biological_process; molecular_function; biological_process	endoplasmic reticulum; protein binding; response to stress; response to abiotic stimulus; catalytic activity; metabolic process	TAIR:AT1G05260; TAIR:AT1G05260; TAIR:AT1G05260; TAIR:AT1G05260; TAIR:AT1G05260; TAIR:AT1G05260	PF00141.16	peroxidase	Family	N/A	N/A	N/A	NA	NA	NA	NA	LOC_Os06g20150	NA	NA	NA	NA	NA	NA	NA	NA
XLOC_041071	XLOC_041071	LOC_Os06g20200	Chr6:11586342-11588079	0.418387	2.74028	2.71142	2.42217	0.0469	0.594318	no	gibberellin receptor GID1L2, putative, expressed	GO:0008152; GO:0016787; GO:0009856; GO:0016043; GO:0009653; GO:0030154; GO:0016049; GO:0007275	biological_process; molecular_function; biological_process; biological_process; biological_process; biological_process; biological_process; biological_process	metabolic process; hydrolase activity; pollination; cellular component organization; anatomical structure morphogenesis; cell differentiation; cell growth; multicellular organismal development	TAIR:AT5G23530; TAIR:AT5G23530; TAIR:AT5G23530; TAIR:AT5G23530; TAIR:AT5G23530; TAIR:AT5G23530; TAIR:AT5G23530; TAIR:AT5G23530	PF07859.6	Abhydrolase_3	Domain	IPR013094	Alpha/beta hydrolase fold-3	Biological Process: metabolic process (GO:0008152), Molecular Function: hydrolase activity (GO:0016787)	NA	NA	NA	NA	LOC_Os06g20200	NA	NA	NA	NA	NA	NA	NA	NA
XLOC_041202	XLOC_041202	LOC_Os06g22919	Chr6:13375502-13390470	1.37015	16.3193	3.57417	4.64204	0.0003	0.0400758	yes	DEFL9 - Defensin and Defensin-like DEFL family, expressed	GO:0005576; GO:0016740; GO:0008152; GO:0005975; GO:0009987; GO:0016787; GO:0005623; GO:0005618; GO:0005576; GO:0016740; GO:0008152; GO:0005975; GO:0009987; GO:0016787; GO:0005623; GO:0005618; GO:0005576; GO:0016740; GO:0008152; GO:0005975; GO:0009987; GO:0016787; GO:0005623; GO:0005618; GO:0005576; GO:0016740; GO:0008152; GO:0005975; GO:0009987; GO:0016787; GO:0005623; GO:0005618	cellular_component; molecular_function; biological_process; biological_process; biological_process; molecular_function; cellular_component; cellular_component; cellular_component; molecular_function; biological_process; biological_process; biological_process; molecular_function; cellular_component; cellular_component; cellular_component; molecular_function; biological_process; biological_process;…	extracellular region; transferase activity; metabolic process; carbohydrate metabolic process; cellular process; hydrolase activity; cell; cell wall; extracellular region; transferase activity; metabolic process; carbohydrate metabolic process; cellular process; hydrolase activity; cell; cell wall; extracellular region; transferase activity; metabolic process; carbohydrate metabolic process; cell…	TAIR:AT4G28850; TAIR:AT4G28850; TAIR:AT4G28850; TAIR:AT4G28850; TAIR:AT4G28850; TAIR:AT4G28850; TAIR:AT4G28850; TAIR:AT4G28850; TAIR:AT4G28850; TAIR:AT4G28850; TAIR:AT4G28850; TAIR:AT4G28850; TAIR:AT4G28850; TAIR:AT4G28850; TAIR:AT4G28850; TAIR:AT4G28850; TAIR:AT4G28850; TAIR:AT4G28850; TAIR:AT4G28850; TAIR:AT4G28850; TAIR:AT4G28850; TAIR:AT4G28850; TAIR:AT4G28850; TAIR:AT4G28850; TAIR:AT4G28850;…	PF00722.14	Glyco_hydro_16	Domain	IPR000757	Glycoside hydrolase, family 16	Molecular Function: hydrolase activity, hydrolyzing O-glycosyl compounds (GO:0004553), Biological Process: carbohydrate metabolic process (GO:0005975)	NA	NA	NA	NA	LOC_Os06g22919	NA	NA	NA	NA	NA	NA	NA	NA
XLOC_041802	XLOC_041802	LOC_Os06g36560	Chr6:21478350-21482797	10.5943	65.0729	2.61876	4.07277	0.0004	0.0465055	yes	inositol oxygenase, putative, expressed	GO:0008152; GO:0009653; GO:0009987; GO:0005737; GO:0003824; GO:0008152; GO:0009653; GO:0009987; GO:0005737; GO:0003824	biological_process; biological_process; biological_process; cellular_component; molecular_function; biological_process; biological_process; biological_process; cellular_component; molecular_function	metabolic process; anatomical structure morphogenesis; cellular process; cytoplasm; catalytic activity; metabolic process; anatomical structure morphogenesis; cellular process; cytoplasm; catalytic activity	TAIR:AT1G14520; TAIR:AT1G14520; TAIR:AT1G14520; TAIR:AT1G14520; TAIR:AT1G14520; TAIR:AT1G14520; TAIR:AT1G14520; TAIR:AT1G14520; TAIR:AT1G14520; TAIR:AT1G14520	PF05153.8	DUF706	Family	IPR007828	Protein of unknown function DUF706	Molecular Function: iron ion binding (GO:0005506), Cellular Component: cytoplasm (GO:0005737), Biological Process: inositol catabolic process (GO:0019310), Molecular Function: inositol oxygenase activity (GO:0050113), Biological Process: oxidation reduction (GO:0055114)	Q5Z8T3	4341305;	NP_001057871.1;	osa:4341305;	LOC_Os06g36560	NA	NA	NA	NA	NA	NA	NA	NA
XLOC_041960	XLOC_041960	LOC_Os06g39712	Chr6:23574362-23575246	40.176	260.948	2.69936	4.15721	0.0001	0.0199623	yes	OsClp10 - Putative Clp protease homologue, expressed	GO:0009536; GO:0016020; GO:0009579; GO:0019538; GO:0016787	cellular_component; cellular_component; cellular_component; biological_process; molecular_function	plastid; membrane; thylakoid; protein metabolic process; hydrolase activity	TAIR:ATCG00670; TAIR:ATCG00670; TAIR:ATCG00670; TAIR:ATCG00670; TAIR:ATCG00670	PF00574.16	CLP_protease	Domain	IPR001907	Peptidase S14, ClpP	Molecular Function: serine-type endopeptidase activity (GO:0004252), Biological Process: proteolysis (GO:0006508)	NA	NA	NA	NA	LOC_Os06g39712	NA	NA	NA	NA	NA	NA	NA	NA
XLOC_041964	XLOC_041964	LOC_Os06g39750	Chr6:23608737-23611100	1.51389	7.27254	2.2642	2.79229	0.01135	0.296501	no	3-ketoacyl-CoA synthase, putative, expressed	GO:0016020; GO:0008152; GO:0006950; GO:0009628; GO:0016740; GO:0003824; GO:0016020; GO:0008152; GO:0006950; GO:0009628; GO:0016740; GO:0003824; GO:0016020; GO:0008152; GO:0006950; GO:0009628; GO:0016740; GO:0003824	cellular_component; biological_process; biological_process; biological_process; molecular_function; molecular_function; cellular_component; biological_process; biological_process; biological_process; molecular_function; molecular_function; cellular_component; biological_process; biological_process; biological_process; molecular_function; molecular_function	membrane; metabolic process; response to stress; response to abiotic stimulus; transferase activity; catalytic activity; membrane; metabolic process; response to stress; response to abiotic stimulus; transferase activity; catalytic activity; membrane; metabolic process; response to stress; response to abiotic stimulus; transferase activity; catalytic activity	TAIR:AT2G26640; TAIR:AT2G26640; TAIR:AT2G26640; TAIR:AT2G26640; TAIR:AT2G26640; TAIR:AT2G26640; TAIR:AT2G26640; TAIR:AT2G26640; TAIR:AT2G26640; TAIR:AT2G26640; TAIR:AT2G26640; TAIR:AT2G26640; TAIR:AT2G26640; TAIR:AT2G26640; TAIR:AT2G26640; TAIR:AT2G26640; TAIR:AT2G26640; TAIR:AT2G26640	PF08392.5	FAE1_CUT1_RppA	Family	IPR016038	Thiolase-like, subgroup	Molecular Function: catalytic activity (GO:0003824), Biological Process: metabolic process (GO:0008152)	NA	NA	NA	NA	LOC_Os06g39750	PWY-5080	very long chain fatty acid biosynthesis I	RXN-7697	EC-2.3.1.199	GN7F-18731-MONOMER		GN7F-18731	LOC_Os07g15190.1
XLOC_042295	XLOC_042295	LOC_Os06g46149	Chr6:27960803-27971323	9.26504	40.7903	2.13836	2.66072	0.00575	0.208482	no	serine/arginine repetitive matrix protein 1, putative, expressed	NA	NA	NA	NA	NA	NA	NA	N/A	N/A	N/A	NA	NA	NA	NA	LOC_Os06g46149	NA	NA	NA	NA	NA	NA	NA	NA
XLOC_042301	XLOC_042301	LOC_Os06g46340	Chr6:28100800-28106083	0.50899	2.92622	2.52333	2.63558	0.0325	0.505364	no	glycosyl hydrolase, family 31, putative, expressed	GO:0005576; GO:0016787; GO:0005618; GO:0008152; GO:0005975; GO:0005773	cellular_component; molecular_function; cellular_component; biological_process; biological_process; cellular_component	extracellular region; hydrolase activity; cell wall; metabolic process; carbohydrate metabolic process; vacuole	TAIR:AT5G11720; TAIR:AT5G11720; TAIR:AT5G11720; TAIR:AT5G11720; TAIR:AT5G11720; TAIR:AT5G11720	PF01055.19	Glyco_hydro_31	Family	N/A	N/A	N/A	NA	NA	NA	NA	LOC_Os06g46340	NA	NA	NA	NA	NA	NA	NA	NA
XLOC_042330	XLOC_042330	LOC_Os06g46950	Chr6:28483806-28484624	0.985127	8.15686	3.04963	2.79518	0.03355	0.513095	no	EF hand family protein, putative, expressed	GO:0005515; GO:0009653; GO:0016043; GO:0030154; GO:0007275; GO:0005488	molecular_function; biological_process; biological_process; biological_process; biological_process; molecular_function	protein binding; anatomical structure morphogenesis; cellular component organization; cell differentiation; multicellular organismal development; binding	TAIR:AT2G46600; TAIR:AT2G46600; TAIR:AT2G46600; TAIR:AT2G46600; TAIR:AT2G46600; TAIR:AT2G46600	NA	NA	NA	N/A	N/A	N/A	NA	NA	NA	NA	LOC_Os06g46950	NA	NA	NA	NA	NA	NA	NA	NA
XLOC_042408	XLOC_042408	LOC_Os06g48500	Chr6:29341863-29343967	4.50842	18.7678	2.05756	2.91038	0.00555	0.205743	no	expressed protein	NA	NA	NA	NA	NA	NA	NA	N/A	N/A	N/A	NA	NA	NA	NA	LOC_Os06g48500	NA	NA	NA	NA	NA	NA	NA	NA
XLOC_042446	XLOC_042446	LOC_Os06g49250	Chr6:29838141-29841422	1.61686	17.8462	3.46436	4.43918	0.0007	0.0632991	no	peptide transporter PTR2, putative, expressed	GO:0005215; GO:0006810; GO:0005773; GO:0016020; GO:0005215; GO:0006810; GO:0005773; GO:0016020; GO:0016020; GO:0006810; GO:0005215; GO:0016020; GO:0006810; GO:0005215; GO:0016020; GO:0006810; GO:0005215	molecular_function; biological_process; cellular_component; cellular_component; molecular_function; biological_process; cellular_component; cellular_component; cellular_component; biological_process; molecular_function; cellular_component; biological_process; molecular_function; cellular_component; biological_process; molecular_function	transporter activity; transport; vacuole; membrane; transporter activity; transport; vacuole; membrane; membrane; transport; transporter activity; membrane; transport; transporter activity; membrane; transport; transporter activity	TAIR:AT2G02040; TAIR:AT2G02040; TAIR:AT2G02040; TAIR:AT2G02040; TAIR:AT2G02040; TAIR:AT2G02040; TAIR:AT2G02040; TAIR:AT2G02040; TAIR:AT1G62200; TAIR:AT1G62200; TAIR:AT1G62200; TAIR:AT1G62200; TAIR:AT1G62200; TAIR:AT1G62200; TAIR:AT1G62200; TAIR:AT1G62200; TAIR:AT1G62200	PF00854.14	PTR2	Family	N/A	N/A	N/A	NA	NA	NA	NA	LOC_Os06g49250	NA	NA	NA	NA	NA	NA	NA	NA
XLOC_042531	XLOC_042531	LOC_Os06g51060	Chr6:30890710-30892066	0.961501	10.7145	3.47813	3.65069	0.012	0.303007	no	CHIT8 - Chitinase family protein precursor, expressed	GO:0006950; GO:0009607; GO:0008152; GO:0005773; GO:0016020; GO:0008150; GO:0005829; GO:0007165; GO:0009719; GO:0016787	biological_process; biological_process; biological_process; cellular_component; cellular_component; biological_process; cellular_component; biological_process; biological_process; molecular_function	response to stress; response to biotic stimulus; metabolic process; vacuole; membrane; biological_process; cytosol; signal transduction; response to endogenous stimulus; hydrolase activity	TAIR:AT3G12500; TAIR:AT3G12500; TAIR:AT3G12500; TAIR:AT3G12500; TAIR:AT3G12500; TAIR:AT3G12500; TAIR:AT3G12500; TAIR:AT3G12500; TAIR:AT3G12500; TAIR:AT3G12500	PF00182.12	Glyco_hydro_19	Domain	N/A	N/A	N/A	Q42993	NA	NA	NA	LOC_Os06g51060	PWY-6902	chitin degradation II	3.2.1.14-RXN	EC-3.2.1.14	GN7F-27405-MONOMER	chitinase	GN7F-27405	LOC_Os04g41620.1
XLOC_042563	XLOC_042563	LOC_Os06g01030	Chr6:11523-18441	0.340893	2.5069	2.87852	3.20017	0.00585	0.209665	no	NA	NA	NA	NA	NA	PF00385.17	Chromo	Family	IPR012337	Polynucleotidyl transferase, ribonuclease H fold	Molecular Function: nucleic acid binding (GO:0003676)	NA	NA	NA	NA	LOC_Os06g01030	NA	NA	NA	NA	NA	NA	NA	NA
XLOC_042601	XLOC_042601	LOC_Os06g01760	Chr6:438683-441553	0.432986	14.7449	5.08975	5.0316	0.0092	0.268291	no	ligA, putative, expressed	NA	NA	NA	NA	NA	NA	NA	N/A	N/A	N/A	NA	NA	NA	NA	LOC_Os06g01760	NA	NA	NA	NA	NA	NA	NA	NA
XLOC_042639	XLOC_042639	LOC_Os06g02540	Chr6:876841-880535	15.5117	101.097	2.70431	4.12521	0.0002	0.0301425	yes	expressed protein	GO:0003674; GO:0008150; GO:0003674; GO:0008150	molecular_function; biological_process; molecular_function; biological_process	molecular_function; biological_process; molecular_function; biological_process	TAIR:AT5G45410; TAIR:AT5G45410; TAIR:AT5G45410; TAIR:AT5G45410	NA	NA	NA	N/A	N/A	N/A	NA	NA	NA	NA	LOC_Os06g02540	NA	NA	NA	NA	NA	NA	NA	NA
XLOC_042709	XLOC_042709	LOC_Os06g04150	Chr6:1733934-1735135	1.25932	8.05717	2.67762	2.81441	0.02815	0.473731	no	magnesium-protoporphyrin O-methyltransferase, putative, expressed	GO:0016020; GO:0009536; GO:0009579; GO:0008152; GO:0009987; GO:0016740; GO:0009058	cellular_component; cellular_component; cellular_component; biological_process; biological_process; molecular_function; biological_process	membrane; plastid; thylakoid; metabolic process; cellular process; transferase activity; biosynthetic process	TAIR:AT4G25080; TAIR:AT4G25080; TAIR:AT4G25080; TAIR:AT4G25080; TAIR:AT4G25080; TAIR:AT4G25080; TAIR:AT4G25080	PF07109.4	Mg-por_mtran_C	Family	IPR010940	Magnesium-protoporphyrin IX methyltransferase, C-terminal	Biological Process: photosynthesis (GO:0015979), Biological Process: chlorophyll biosynthetic process (GO:0015995), Molecular Function: magnesium protoporphyrin IX methyltransferase activity (GO:0046406)	NA	NA	NA	NA	LOC_Os06g04150	CHLOROPHYLL-SYN	chlorophyllide <i>a</i> biosynthesis I (aerobic, light-dependent)	RXN-MG-PROTOPORPHYRIN-METHYLESTER-SYN	EC-2.1.1.11	GN7F-23887-MONOMER		GN7F-23887	LOC_Os06g04150.1
XLOC_042860	XLOC_042860	LOC_Os06g07200	Chr6:3445018-3448344	1.22514	8.15487	2.73472	2.88047	0.0242	0.439321	no	syntaxin, putative, expressed	GO:0006810; GO:0009987; GO:0005515; GO:0005575; GO:0016043; GO:0005886; GO:0009719	biological_process; biological_process; molecular_function; cellular_component; biological_process; cellular_component; biological_process	transport; cellular process; protein binding; cellular_component; cellular component organization; plasma membrane; response to endogenous stimulus	TAIR:AT5G08080; TAIR:AT5G08080; TAIR:AT5G08080; TAIR:AT5G08080; TAIR:AT5G08080; TAIR:AT5G08080; TAIR:AT5G08080	PF05739.12	SNARE	Family	N/A	N/A	N/A	NA	NA	NA	NA	LOC_Os06g07200	NA	NA	NA	NA	NA	NA	NA	NA
XLOC_042881	XLOC_042881	LOC_Os06g07600	Chr6:3675571-3679002	1.96053	26.0371	3.73125	5.12741	0.00035	0.0437707	yes	uncharacterized glycosyltransferase, putative, expressed	GO:0008152; GO:0005575; GO:0006950; GO:0009628; GO:0008150; GO:0016787; GO:0009536	biological_process; cellular_component; biological_process; biological_process; biological_process; molecular_function; cellular_component	metabolic process; cellular_component; response to stress; response to abiotic stimulus; biological_process; hydrolase activity; plastid	TAIR:AT5G20250; TAIR:AT5G20250; TAIR:AT5G20250; TAIR:AT5G20250; TAIR:AT5G20250; TAIR:AT5G20250; TAIR:AT5G20250	PF05691.5	Raffinose_syn	Family	N/A	N/A	N/A	NA	NA	NA	NA	LOC_Os06g07600	NA	NA	NA	NA	NA	NA	NA	NA
XLOC_043000	XLOC_043000	LOC_Os06g09980	Chr6:5090589-5095599	0.720431	3.84844	2.41734	3.03731	0.00685	0.226762	no	expressed protein	NA	NA	NA	NA	NA	NA	NA	N/A	N/A	N/A	NA	NA	NA	NA	LOC_Os06g09980	NA	NA	NA	NA	NA	NA	NA	NA
XLOC_043176	XLOC_043176	LOC_Os06g13560	Chr6:7480066-7482254	2.28484	9.61874	2.07375	2.52875	0.01375	0.325593	no	SAM dependent carboxyl methyltransferase, putative, expressed	GO:0006950; GO:0005575; GO:0016740; GO:0009607; GO:0008152; GO:0009987; GO:0006950; GO:0005575; GO:0016740; GO:0009607; GO:0008152; GO:0009987; GO:0006950; GO:0005575; GO:0016740; GO:0009607; GO:0008152; GO:0009987; GO:0006950; GO:0005575; GO:0016740; GO:0009607; GO:0008152; GO:0009987; GO:0016740; GO:0008152; GO:0009987; GO:0008150	biological_process; cellular_component; molecular_function; biological_process; biological_process; biological_process; biological_process; cellular_component; molecular_function; biological_process; biological_process; biological_process; biological_process; cellular_component; molecular_function; biological_process; biological_process; biological_process; biological_process; cellular_component;…	response to stress; cellular_component; transferase activity; response to biotic stimulus; metabolic process; cellular process; response to stress; cellular_component; transferase activity; response to biotic stimulus; metabolic process; cellular process; response to stress; cellular_component; transferase activity; response to biotic stimulus; metabolic process; cellular process; response to str…	TAIR:AT3G11480; TAIR:AT3G11480; TAIR:AT3G11480; TAIR:AT3G11480; TAIR:AT3G11480; TAIR:AT3G11480; TAIR:AT3G11480; TAIR:AT3G11480; TAIR:AT3G11480; TAIR:AT3G11480; TAIR:AT3G11480; TAIR:AT3G11480; TAIR:AT3G11480; TAIR:AT3G11480; TAIR:AT3G11480; TAIR:AT3G11480; TAIR:AT3G11480; TAIR:AT3G11480; TAIR:AT3G11480; TAIR:AT3G11480; TAIR:AT3G11480; TAIR:AT3G11480; TAIR:AT3G11480; TAIR:AT3G11480; TAIR:AT5G66430;…	PF03492.8	Methyltransf_7	Family	IPR005299	SAM dependent carboxyl methyltransferase	Molecular Function: methyltransferase activity (GO:0008168)	NA	NA	NA	NA	LOC_Os06g13560	PWY-4203	volatile benzenoid biosynthesis I (ester formation)	RXN-6723	EC-2.1.1.274	GN7F-32369-MONOMER	LOC_Os06g13510.1	GN7F-32369	LOC_Os06g13510.1
XLOC_043425	XLOC_043425	LOC_Os06g19070	Chr6:10843919-10846020	0.961131	24.5181	4.67297	5.39735	0.00135	0.09522	no	cytochrome P450, putative, expressed	GO:0003674; GO:0005488; GO:0003824; GO:0008152; GO:0019825	molecular_function; molecular_function; molecular_function; biological_process; molecular_function	molecular_function; binding; catalytic activity; metabolic process; oxygen binding	TAIR:AT2G45570; TAIR:AT2G45570; TAIR:AT2G45570; TAIR:AT2G45570; TAIR:AT2G45570	PF00067.15	p450	Domain	IPR002401	Cytochrome P450, E-class, group I	Molecular Function: monooxygenase activity (GO:0004497), Molecular Function: iron ion binding (GO:0005506), Molecular Function: heme binding (GO:0020037), Biological Process: oxidation reduction (GO:0055114)	NA	NA	NA	NA	LOC_Os06g19070	PWY-5060	luteolin biosynthesis	RXN-7651	EC-1.14.13.21	GN7F-20371-MONOMER		GN7F-20371	LOC_Os09g08920.1
XLOC_043452	XLOC_043452	LOC_Os06g19590	Chr6:11170410-11174891	0.664393	5.47248	3.04209	2.88927	0.027	0.46479	no	estradiol 17-beta-dehydrogenase 12, putative, expressed	GO:0016020; GO:0005783; GO:0007275; GO:0003824; GO:0008152; GO:0009790; GO:0009058; GO:0009987; GO:0006629	cellular_component; cellular_component; biological_process; molecular_function; biological_process; biological_process; biological_process; biological_process; biological_process	membrane; endoplasmic reticulum; multicellular organismal development; catalytic activity; metabolic process; embryo development; biosynthetic process; cellular process; lipid metabolic process	TAIR:AT1G67730; TAIR:AT1G67730; TAIR:AT1G67730; TAIR:AT1G67730; TAIR:AT1G67730; TAIR:AT1G67730; TAIR:AT1G67730; TAIR:AT1G67730; TAIR:AT1G67730	PF00106.18	adh_short	Domain	N/A	N/A	N/A	NA	NA	NA	NA	LOC_Os06g19590	PWY-5080	very long chain fatty acid biosynthesis I	RXN-7698	EC-1.1.1.330	GN7F-17097-MONOMER	LOC_Os06g19540.1	GN7F-17097	LOC_Os06g19540.1
XLOC_043523	XLOC_043523	LOC_Os06g20900	Chr6:12076312-12079453	0.77467	10.541	3.76628	3.7038	0.0151	0.343566	no	expressed protein	NA	NA	NA	NA	NA	NA	NA	N/A	N/A	N/A	NA	NA	NA	NA	LOC_Os06g20900	NA	NA	NA	NA	NA	NA	NA	NA
XLOC_043528	XLOC_043528	LOC_Os06g20960	Chr6:12115574-12118523	0.533007	6.87761	3.68968	3.23005	0.0398	0.557247	no	SAM dependent carboxyl methyltransferase, putative, expressed	GO:0005575; GO:0016740; GO:0008152; GO:0009987; GO:0008150	cellular_component; molecular_function; biological_process; biological_process; biological_process	cellular_component; transferase activity; metabolic process; cellular process; biological_process	TAIR:AT4G36470; TAIR:AT4G36470; TAIR:AT4G36470; TAIR:AT4G36470; TAIR:AT4G36470	PF03492.8	Methyltransf_7	Family	N/A	N/A	N/A	NA	NA	NA	NA	LOC_Os06g20960	PWY-5305	bixin biosynthesis	RXN-8238	EC-2.1.1	GN7F-31957-MONOMER	LOC_Os10g09360.1	GN7F-31957	LOC_Os10g09360.1
XLOC_043709	XLOC_043709	LOC_Os06g24990,LOC_Os06g25010	Chr6:14641575-14648360	5.14402	31.1289	2.59729	2.91613	0.0098	0.276786	no	xylanase inhibitor protein 1 precursor, putative, expressed	GO:0006950; GO:0008152; GO:0009628; GO:0003824; GO:0005623; GO:0005488; GO:0016787; GO:0009991; GO:0007154	biological_process; biological_process; biological_process; molecular_function; cellular_component; molecular_function; molecular_function; biological_process; biological_process	response to stress; metabolic process; response to abiotic stimulus; catalytic activity; cell; binding; hydrolase activity; response to extracellular stimulus; cell communication	TAIR:AT5G24090; TAIR:AT5G24090; TAIR:AT5G24090; TAIR:AT5G24090; TAIR:AT5G24090; TAIR:AT5G24090; TAIR:AT5G24090; TAIR:AT5G24090; TAIR:AT5G24090	NA	NA	NA	IPR013781	Glycoside hydrolase, subgroup, catalytic core	Molecular Function: catalytic activity (GO:0003824), Biological Process: carbohydrate metabolic process (GO:0005975), Molecular Function: cation binding (GO:0043169)	NA	NA	NA	NA	LOC_Os06g24990	PWY-6902	chitin degradation II	3.2.1.14-RXN	EC-3.2.1.14	GN7F-31846-MONOMER	chitinase	GN7F-31846	LOC_Os06g24990.1
XLOC_044196	XLOC_044196	LOC_Os06g35520	Chr6:20705348-20706997	2.83539	24.3667	3.10329	4.08693	0.00165	0.107494	no	peroxidase precursor, putative, expressed	GO:0006950; GO:0005576; GO:0005515; GO:0005618; GO:0003824; GO:0005829; GO:0008152	biological_process; cellular_component; molecular_function; cellular_component; molecular_function; cellular_component; biological_process	response to stress; extracellular region; protein binding; cell wall; catalytic activity; cytosol; metabolic process	TAIR:AT5G05340; TAIR:AT5G05340; TAIR:AT5G05340; TAIR:AT5G05340; TAIR:AT5G05340; TAIR:AT5G05340; TAIR:AT5G05340	PF00141.16	peroxidase	Family	IPR000823	Plant peroxidase	Molecular Function: peroxidase activity (GO:0004601), Biological Process: response to oxidative stress (GO:0006979), Molecular Function: heme binding (GO:0020037), Biological Process: oxidation reduction (GO:0055114)	NA	NA	NA	NA	LOC_Os06g35520	NA	NA	NA	NA	NA	NA	NA	NA
XLOC_044366	XLOC_044366	LOC_Os06g38830	Chr6:23042620-23052388	2.51129	13.6523	2.44265	3.23945	0.00395	0.176931	no	receptor-like protein kinase precursor, putative, expressed	GO:0007165; GO:0016301; GO:0000166; GO:0006464; GO:0005886	biological_process; molecular_function; molecular_function; biological_process; cellular_component	signal transduction; kinase activity; nucleotide binding; protein modification process; plasma membrane	TAIR:AT4G36180; TAIR:AT4G36180; TAIR:AT4G36180; TAIR:AT4G36180; TAIR:AT4G36180	PF08263.5	LRRNT_2	Family	N/A	N/A	N/A	NA	NA	NA	NA	LOC_Os06g38830	NA	NA	NA	NA	NA	NA	NA	NA
XLOC_044409	XLOC_044409	LOC_Os06g39752	Chr6:23586380-23586782	170.61	1394.2	3.03066	4.41984	0.0004	0.0465055	yes	expressed protein	NA	NA	NA	NA	NA	NA	NA	NA	NA	NA	NA	NA	NA	NA	LOC_Os06g39752	NA	NA	NA	NA	NA	NA	NA	NA
XLOC_044467	XLOC_044467	LOC_Os06g41020	Chr6:24494322-24500971	0.384428	2.51331	2.7088	2.62298	0.0195	0.395988	no	DUF1680 domain containing protein, putative, expressed	GO:0005623; GO:0008152; GO:0003824	cellular_component; biological_process; molecular_function	cell; metabolic process; catalytic activity	TAIR:AT5G12960; TAIR:AT5G12960; TAIR:AT5G12960	PF07944.5	DUF1680	Family	N/A	N/A	N/A	NA	NA	NA	NA	LOC_Os06g41020	NA	NA	NA	NA	NA	NA	NA	NA
XLOC_044620	XLOC_044620	LOC_Os06g44170	Chr6:26650126-26652370	7.17788	30.8773	2.10492	3.09699	0.00325	0.159797	no	NAD dependent epimerase/dehydratase family protein, putative, expressed	GO:0005575; GO:0008152; GO:0003824; GO:0009987; GO:0005575; GO:0008152; GO:0003824; GO:0009987	cellular_component; biological_process; molecular_function; biological_process; cellular_component; biological_process; molecular_function; biological_process	cellular_component; metabolic process; catalytic activity; cellular process; cellular_component; metabolic process; catalytic activity; cellular process	TAIR:AT4G27250; TAIR:AT4G27250; TAIR:AT4G27250; TAIR:AT4G27250; TAIR:AT4G27250; TAIR:AT4G27250; TAIR:AT4G27250; TAIR:AT4G27250	PF01370.14	Epimerase	Family	IPR016040	NAD(P)-binding domain	Molecular Function: catalytic activity (GO:0003824), Molecular Function: binding (GO:0005488), Biological Process: metabolic process (GO:0008152)	NA	NA	NA	NA	LOC_Os06g44170	NA	NA	NA	NA	NA	NA	NA	NA
XLOC_044662	XLOC_044662	LOC_Os06g45130	Chr6:27294147-27297941	0.217671	1.56045	2.84174	2.58308	0.0408	0.563089	no	expressed protein	NA	NA	NA	NA	NA	NA	NA	N/A	N/A	N/A	NA	NA	NA	NA	LOC_Os06g45130	NA	NA	NA	NA	NA	NA	NA	NA
XLOC_044663	XLOC_044663	LOC_Os06g45140	Chr6:27299913-27302140	6.25457	87.1381	3.80032	5.39801	5e-05	0.0117035	yes	bZIP transcription factor domain containing protein, expressed	GO:0003677; GO:0005634; GO:0005515; GO:0009058; GO:0006139; GO:0003700; GO:0003677; GO:0005634; GO:0005515; GO:0009058; GO:0006139; GO:0003700; GO:0003677; GO:0005634; GO:0005515; GO:0009058; GO:0006139; GO:0003700	molecular_function; cellular_component; molecular_function; biological_process; biological_process; molecular_function; molecular_function; cellular_component; molecular_function; biological_process; biological_process; molecular_function; molecular_function; cellular_component; molecular_function; biological_process; biological_process; molecular_function	DNA binding; nucleus; protein binding; biosynthetic process; nucleobase, nucleoside, nucleotide and nucleic acid metabolic process; sequence-specific DNA binding transcription factor activity; DNA binding; nucleus; protein binding; biosynthetic process; nucleobase, nucleoside, nucleotide and nucleic acid metabolic process; sequence-specific DNA binding transcription factor activity; DNA binding; …	TAIR:AT5G24800; TAIR:AT5G24800; TAIR:AT5G24800; TAIR:AT5G24800; TAIR:AT5G24800; TAIR:AT5G24800; TAIR:AT5G24800; TAIR:AT5G24800; TAIR:AT5G24800; TAIR:AT5G24800; TAIR:AT5G24800; TAIR:AT5G24800; TAIR:AT5G24800; TAIR:AT5G24800; TAIR:AT5G24800; TAIR:AT5G24800; TAIR:AT5G24800; TAIR:AT5G24800	PF00170.14	bZIP_1	Family	IPR011616	bZIP transcription factor, bZIP-1	Molecular Function: transcription factor activity (GO:0003700), Biological Process: regulation of transcription, DNA-dependent (GO:0006355), Molecular Function: sequence-specific DNA binding (GO:0043565), Molecular Function: protein dimerization activity (GO:0046983)	NA	NA	NA	NA	LOC_Os06g45140	NA	NA	NA	NA	NA	NA	NA	NA
XLOC_044836	XLOC_044836	LOC_Os06g48250	Chr6:29184361-29186298	0.464791	5.73967	3.62631	3.5507	0.0166	0.364525	no	ATPase, putative, expressed	GO:0005783; GO:0008152; GO:0000166; GO:0009719; GO:0009056; GO:0006139; GO:0016787	cellular_component; biological_process; molecular_function; biological_process; biological_process; biological_process; molecular_function	endoplasmic reticulum; metabolic process; nucleotide binding; response to endogenous stimulus; catabolic process; nucleobase, nucleoside, nucleotide and nucleic acid metabolic process; hydrolase activity	TAIR:AT3G28580; TAIR:AT3G28580; TAIR:AT3G28580; TAIR:AT3G28580; TAIR:AT3G28580; TAIR:AT3G28580; TAIR:AT3G28580	PF00004.22	AAA	Family	N/A	N/A	N/A	NA	NA	NA	NA	LOC_Os06g48250	NA	NA	NA	NA	NA	NA	NA	NA
XLOC_044838	XLOC_044838	LOC_Os06g48300	Chr6:29208085-29210947	2.22146	18.1952	3.03398	3.60941	0.00575	0.208482	no	protein phosphatase 2C, putative, expressed	GO:0008150; GO:0006464; GO:0006950; GO:0009607; GO:0008152; GO:0009987; GO:0016787; GO:0005886	biological_process; biological_process; biological_process; biological_process; biological_process; biological_process; molecular_function; cellular_component	biological_process; protein modification process; response to stress; response to biotic stimulus; metabolic process; cellular process; hydrolase activity; plasma membrane	TAIR:AT4G31750; TAIR:AT4G31750; TAIR:AT4G31750; TAIR:AT4G31750; TAIR:AT4G31750; TAIR:AT4G31750; TAIR:AT4G31750; TAIR:AT4G31750	PF00481.14	PP2C	Family	N/A	N/A	N/A	Q5Z6F5	4341949;	NP_001058464.1;	osa:4341949;	LOC_Os06g48300	NA	NA	NA	NA	NA	NA	NA	NA
XLOC_044898	XLOC_044898	LOC_Os06g49390,LOC_Os06g49420	Chr6:29926769-29948040	1.09867	6.0256	2.45535	3.321	0.00325	0.159797	no	NBS-LRR disease resistance protein, putative, expressed	GO:0000166; GO:0006950	molecular_function; biological_process	nucleotide binding; response to stress	TAIR:AT3G14460; TAIR:AT3G14460	PF00931.15	NB-ARC	Domain	N/A	N/A	N/A	NA	NA	NA	NA	LOC_Os06g49390	NA	NA	NA	NA	NA	NA	NA	NA
XLOC_044929	XLOC_044929	LOC_Os06g50040	Chr6:30314748-30315668	10.0624	49.0801	2.28617	3.34165	0.0031	0.155294	no	OsSAUR29 - Auxin-responsive SAUR gene family member, expressed	GO:0003674; GO:0005575; GO:0009719	molecular_function; cellular_component; biological_process	molecular_function; cellular_component; response to endogenous stimulus	TAIR:AT2G46690; TAIR:AT2G46690; TAIR:AT2G46690	PF02519.7	Auxin_inducible	Family	N/A	N/A	N/A	NA	NA	NA	NA	LOC_Os06g50040	NA	NA	NA	NA	NA	NA	NA	NA
XLOC_045135	XLOC_045135	LOC_Os07g03710,LOC_Os07g03720,LOC_Os07g03730,LOC_Os07g03740	Chr7:1512024-1621838	5.7861	146.073	4.65795	3.98663	0.00465	0.189657	no	SCP-like extracellular protein, expressed	GO:0005623; GO:0003674; GO:0005576; GO:0008150	cellular_component; molecular_function; cellular_component; biological_process	cell; molecular_function; extracellular region; biological_process	TAIR:AT5G57625; TAIR:AT5G57625; TAIR:AT5G57625; TAIR:AT5G57625	PF00188.19	CAP	Domain	N/A	N/A	N/A	NA	NA	NA	NA	LOC_Os07g03710	NA	NA	NA	NA	NA	NA	NA	NA
XLOC_045147	XLOC_045147	LOC_Os07g04040	Chr7:1712200-1714497	0.309787	2.51122	3.01904	2.76449	0.0338	0.51528	no	expressed protein	GO:0005623; GO:0008152; GO:0009987; GO:0007275; GO:0016301; GO:0006464	cellular_component; biological_process; biological_process; biological_process; molecular_function; biological_process	cell; metabolic process; cellular process; multicellular organismal development; kinase activity; protein modification process	TAIR:AT3G53810; TAIR:AT3G53810; TAIR:AT3G53810; TAIR:AT3G53810; TAIR:AT3G53810; TAIR:AT3G53810	PF00069.18	Pkinase	Domain	IPR011009	Protein kinase-like domain	N/A	NA	NA	NA	NA	LOC_Os07g04040	NA	NA	NA	NA	NA	NA	NA	NA
XLOC_045349	XLOC_045349	LOC_Os07g08150	Chr7:4143339-4144573	14.4944	102.512	2.82223	4.33653	5e-05	0.0117035	yes	early light-induced protein, chloroplast precursor, putative, expressed	GO:0009628; GO:0006950; GO:0005488	biological_process; biological_process; molecular_function	response to abiotic stimulus; response to stress; binding	TAIR:AT3G22840; TAIR:AT3G22840; TAIR:AT3G22840	PF00504.14	Chloroa_b-bind	Family	N/A	N/A	N/A	NA	NA	NA	NA	LOC_Os07g08150	NA	NA	NA	NA	NA	NA	NA	NA
XLOC_045398	XLOC_045398	LOC_Os07g09010	Chr7:4697185-4699622	0.945456	9.65894	3.35278	3.98581	0.0029	0.148797	no	nodulin, putative, expressed	GO:0006950; GO:0009607; GO:0003674; GO:0005575	biological_process; biological_process; molecular_function; cellular_component	response to stress; response to biotic stimulus; molecular_function; cellular_component	TAIR:AT2G39210; TAIR:AT2G39210; TAIR:AT2G39210; TAIR:AT2G39210	PF07690.9	MFS_1	Family	IPR010658	Nodulin-like	N/A	NA	NA	NA	NA	LOC_Os07g09010	NA	NA	NA	NA	NA	NA	NA	NA
XLOC_045422	XLOC_045422	LOC_Os07g09420	Chr7:4969372-4971156	1.11768	11.0277	3.30256	3.81898	0.00495	0.193583	no	ATPase, putative, expressed	GO:0005783; GO:0008152; GO:0000166; GO:0009719; GO:0009056; GO:0006139; GO:0016787	cellular_component; biological_process; molecular_function; biological_process; biological_process; biological_process; molecular_function	endoplasmic reticulum; metabolic process; nucleotide binding; response to endogenous stimulus; catabolic process; nucleobase, nucleoside, nucleotide and nucleic acid metabolic process; hydrolase activity	TAIR:AT3G28580; TAIR:AT3G28580; TAIR:AT3G28580; TAIR:AT3G28580; TAIR:AT3G28580; TAIR:AT3G28580; TAIR:AT3G28580	PF00004.22	AAA	Family	IPR003959	ATPase, AAA-type, core	Molecular Function: ATP binding (GO:0005524)	NA	NA	NA	NA	LOC_Os07g09420	NA	NA	NA	NA	NA	NA	NA	NA
XLOC_045643	XLOC_045643	LOC_Os07g14150	Chr7:8075626-8078201	34.6015	193.371	2.48246	3.5752	0.00075	0.0664573	no	cytidine deaminase, putative, expressed	GO:0008152; GO:0003824; GO:0006139; GO:0016787; GO:0005829; GO:0005488; GO:0006091; GO:0008152; GO:0003824; GO:0006139; GO:0016787; GO:0005829; GO:0005488; GO:0006091; GO:0008152; GO:0003824; GO:0006139; GO:0016787; GO:0005829; GO:0005488; GO:0006091; GO:0008152; GO:0003824; GO:0006139; GO:0016787; GO:0005829; GO:0005488; GO:0006091; GO:0008152; GO:0003824; GO:0006139; GO:0016787; GO:0005829; GO:…	biological_process; molecular_function; biological_process; molecular_function; cellular_component; molecular_function; biological_process; biological_process; molecular_function; biological_process; molecular_function; cellular_component; molecular_function; biological_process; biological_process; molecular_function; biological_process; molecular_function; cellular_component; molecular_function;…	metabolic process; catalytic activity; nucleobase, nucleoside, nucleotide and nucleic acid metabolic process; hydrolase activity; cytosol; binding; generation of precursor metabolites and energy; metabolic process; catalytic activity; nucleobase, nucleoside, nucleotide and nucleic acid metabolic process; hydrolase activity; cytosol; binding; generation of precursor metabolites and energy; metabol…	TAIR:AT5G28050; TAIR:AT5G28050; TAIR:AT5G28050; TAIR:AT5G28050; TAIR:AT5G28050; TAIR:AT5G28050; TAIR:AT5G28050; TAIR:AT5G28050; TAIR:AT5G28050; TAIR:AT5G28050; TAIR:AT5G28050; TAIR:AT5G28050; TAIR:AT5G28050; TAIR:AT5G28050; TAIR:AT5G28050; TAIR:AT5G28050; TAIR:AT5G28050; TAIR:AT5G28050; TAIR:AT5G28050; TAIR:AT5G28050; TAIR:AT5G28050; TAIR:AT5G28050; TAIR:AT5G28050; TAIR:AT5G28050; TAIR:AT5G28050;…	PF00383.15	dCMP_cyt_deam_1	Family	N/A	N/A	N/A	NA	NA	NA	NA	LOC_Os07g14150	NA	NA	NA	NA	NA	NA	NA	NA
XLOC_046037	XLOC_046037	LOC_Os07g23980	Chr7:13573467-13577153	0.442306	4.53007	3.35642	3.2592	0.00975	0.275668	no	NA	NA	NA	NA	NA	NA	NA	NA	N/A	N/A	N/A	NA	NA	NA	NA	LOC_Os07g23980	LIPASYN-PWY	phospholipases	PHOSPHOLIPASE-C-RXN	EC-3.1.4.3	GN7F-32653-MONOMER	phospholipase C	GN7F-32653	ChrSy.fgenesh.mRNA.4
XLOC_046479	XLOC_046479	LOC_Os07g32590	Chr7:19427899-19432234	1.26108	8.08192	2.68003	3.03517	0.01115	0.295796	no	peptidase, M24 family protein, putative, expressed	GO:0006464; GO:0019538; GO:0008152; GO:0016787; GO:0005739; GO:0009536	biological_process; biological_process; biological_process; molecular_function; cellular_component; cellular_component	protein modification process; protein metabolic process; metabolic process; hydrolase activity; mitochondrion; plastid	TAIR:AT1G13270; TAIR:AT1G13270; TAIR:AT1G13270; TAIR:AT1G13270; TAIR:AT1G13270; TAIR:AT1G13270	PF00557.17	Peptidase_M24	Domain	IPR001714	Peptidase M24, methionine aminopeptidase	Molecular Function: aminopeptidase activity (GO:0004177), Biological Process: proteolysis (GO:0006508), Molecular Function: metalloexopeptidase activity (GO:0008235)	NA	NA	NA	NA	LOC_Os07g32590	NA	NA	NA	NA	NA	NA	NA	NA
XLOC_046540	XLOC_046540	LOC_Os07g33580,LOC_Os07g33610	Chr7:20063284-20081621	0.496067	5.37552	3.4378	3.16366	0.02375	0.435033	no	cytochrome P450, putative, expressed	GO:0005623; GO:0003674; GO:0005488; GO:0003824; GO:0008152; GO:0019825	cellular_component; molecular_function; molecular_function; molecular_function; biological_process; molecular_function	cell; molecular_function; binding; catalytic activity; metabolic process; oxygen binding	TAIR:AT5G36110; TAIR:AT5G36110; TAIR:AT5G36110; TAIR:AT5G36110; TAIR:AT5G36110; TAIR:AT5G36110	PF00067.15	p450	Domain	IPR002401	Cytochrome P450, E-class, group I	Molecular Function: monooxygenase activity (GO:0004497), Molecular Function: iron ion binding (GO:0005506), Molecular Function: heme binding (GO:0020037), Biological Process: oxidation reduction (GO:0055114)	NA	NA	NA	NA	LOC_Os07g33580	NA	NA	NA	NA	NA	NA	NA	NA
XLOC_046609	XLOC_046609	LOC_Os07g34850	Chr7:20884616-20886189	1.74845	12.4352	2.83028	3.38593	0.0068	0.225388	no	aspartic proteinase nepenthesin, putative, expressed	GO:0005623; GO:0019538; GO:0016787	cellular_component; biological_process; molecular_function	cell; protein metabolic process; hydrolase activity	TAIR:AT2G03200; TAIR:AT2G03200; TAIR:AT2G03200	PF00026.16	Asp	Family	N/A	N/A	N/A	NA	NA	NA	NA	LOC_Os07g34850	NA	NA	NA	NA	NA	NA	NA	NA
XLOC_046636	XLOC_046636	LOC_Os07g35330	Chr7:21140940-21144309	0.556296	6.3186	3.50568	3.59651	0.011	0.294037	no	TKL_IRAK_DUF26-lc.13 - DUF26 kinases have homology to DUF26 containing loci, expressed	GO:0008152; GO:0009987; GO:0016301; GO:0005515; GO:0000166; GO:0006464; GO:0005886	biological_process; biological_process; molecular_function; molecular_function; molecular_function; biological_process; cellular_component	metabolic process; cellular process; kinase activity; protein binding; nucleotide binding; protein modification process; plasma membrane	TAIR:AT4G23180; TAIR:AT4G23180; TAIR:AT4G23180; TAIR:AT4G23180; TAIR:AT4G23180; TAIR:AT4G23180; TAIR:AT4G23180	PF01657.10	DUF26	Family	N/A	N/A	N/A	NA	NA	NA	NA	LOC_Os07g35330	NA	NA	NA	NA	NA	NA	NA	NA
XLOC_046637	XLOC_046637	LOC_Os07g35340	Chr7:21146478-21149745	0.981698	13.4246	3.77346	4.4655	0.0009	0.0758121	no	TKL_IRAK_DUF26-lc.14 - DUF26 kinases have homology to DUF26 containing loci, expressed	GO:0008152; GO:0009987; GO:0016301; GO:0005515; GO:0000166; GO:0006464; GO:0005886; GO:0008150; GO:0005623; GO:0008152; GO:0009987; GO:0008219; GO:0016301; GO:0006950; GO:0009607; GO:0008152; GO:0009987; GO:0016301; GO:0005886; GO:0009719; GO:0005773	biological_process; biological_process; molecular_function; molecular_function; molecular_function; biological_process; cellular_component; biological_process; cellular_component; biological_process; biological_process; biological_process; molecular_function; biological_process; biological_process; biological_process; biological_process; molecular_function; cellular_component; biological_process;…	metabolic process; cellular process; kinase activity; protein binding; nucleotide binding; protein modification process; plasma membrane; biological_process; cell; metabolic process; cellular process; cell death; kinase activity; response to stress; response to biotic stimulus; metabolic process; cellular process; kinase activity; plasma membrane; response to endogenous stimulus; vacuole	TAIR:AT4G23180; TAIR:AT4G23180; TAIR:AT4G23180; TAIR:AT4G23180; TAIR:AT4G23180; TAIR:AT4G23180; TAIR:AT4G23180; TAIR:AT4G23130; TAIR:AT4G23130; TAIR:AT4G23130; TAIR:AT4G23130; TAIR:AT4G23130; TAIR:AT4G23130; TAIR:AT4G23130; TAIR:AT4G23130; TAIR:AT4G21410; TAIR:AT4G21410; TAIR:AT4G21410; TAIR:AT4G21410; TAIR:AT4G21410; TAIR:AT4G21410	PF01657.10	DUF26	Family	N/A	N/A	N/A	NA	NA	NA	NA	LOC_Os07g35340	NA	NA	NA	NA	NA	NA	NA	NA
XLOC_046639	XLOC_046639	LOC_Os07g35390	Chr7:21167166-21170686	1.54393	15.1801	3.29751	3.77696	0.0043	0.183296	no	TKL_IRAK_DUF26-lc.17 - DUF26 kinases have homology to DUF26 containing loci, expressed	GO:0005623; GO:0008152; GO:0009987; GO:0016301; GO:0006464	cellular_component; biological_process; biological_process; molecular_function; biological_process	cell; metabolic process; cellular process; kinase activity; protein modification process	TAIR:AT4G05200; TAIR:AT4G05200; TAIR:AT4G05200; TAIR:AT4G05200; TAIR:AT4G05200	PF01657.10	DUF26	Family	N/A	N/A	N/A	NA	NA	NA	NA	LOC_Os07g35390	NA	NA	NA	NA	NA	NA	NA	NA
XLOC_046645	XLOC_046645	LOC_Os07g35540	Chr7:21265832-21269391	2.04371	9.72275	2.25018	3.01858	0.00485	0.193583	no	TKL_IRAK_DUF26-lc.19 - DUF26 kinases have homology to DUF26 containing loci, expressed	GO:0008152; GO:0009987; GO:0016301; GO:0005515; GO:0000166; GO:0006464; GO:0005886	biological_process; biological_process; molecular_function; molecular_function; molecular_function; biological_process; cellular_component	metabolic process; cellular process; kinase activity; protein binding; nucleotide binding; protein modification process; plasma membrane	TAIR:AT4G23180; TAIR:AT4G23180; TAIR:AT4G23180; TAIR:AT4G23180; TAIR:AT4G23180; TAIR:AT4G23180; TAIR:AT4G23180	PF01657.10	DUF26	Family	N/A	N/A	N/A	NA	NA	NA	NA	LOC_Os07g35540	NA	NA	NA	NA	NA	NA	NA	NA
XLOC_046695	XLOC_046695	LOC_Os07g36800	Chr7:22045993-22048316	35.7433	143.637	2.00668	3.1568	0.0023	0.131535	no	UPF0041 domain containing protein, putative, expressed	GO:0005739; GO:0008150; GO:0005739; GO:0008150	cellular_component; biological_process; cellular_component; biological_process	mitochondrion; biological_process; mitochondrion; biological_process	TAIR:AT4G22310; TAIR:AT4G22310; TAIR:AT4G22310; TAIR:AT4G22310	PF03650.6	UPF0041	Family	IPR005336	Uncharacterised protein family UPF0041	N/A	NA	NA	NA	NA	LOC_Os07g36800	NA	NA	NA	NA	NA	NA	NA	NA
XLOC_046769	XLOC_046769	LOC_Os07g38430	Chr7:23091889-23094460	0.804954	4.68814	2.54204	2.50206	0.0367	0.533947	no	WD domain, G-beta repeat domain containing protein, expressed	GO:0005622; GO:0000166; GO:0005886; GO:0008150	cellular_component; molecular_function; cellular_component; biological_process	intracellular; nucleotide binding; plasma membrane; biological_process	TAIR:AT4G02730; TAIR:AT4G02730; TAIR:AT4G02730; TAIR:AT4G02730	PF00400.25	WD40	Repeat	N/A	N/A	N/A	NA	NA	NA	NA	LOC_Os07g38430	NA	NA	NA	NA	NA	NA	NA	NA
XLOC_046853	XLOC_046853	LOC_Os07g39980	Chr7:23985273-23989956	2.39476	15.6131	2.70481	3.44809	0.0038	0.172549	no	GA22009-PA, putative, expressed	NA	NA	NA	NA	PF10343.2	DUF2419	Family	N/A	N/A	N/A	NA	NA	NA	NA	LOC_Os07g39980	NA	NA	NA	NA	NA	NA	NA	NA
XLOC_046855	XLOC_046855	LOC_Os07g40000	Chr7:23996514-23997565	2.23748	10.2903	2.20134	2.42212	0.02625	0.458443	no	DUF260 domain containing protein, putative, expressed	GO:0005575; GO:0008150	cellular_component; biological_process	cellular_component; biological_process	TAIR:AT4G37540; TAIR:AT4G37540	PF03195.7	DUF260	Family	IPR004883	Lateral organ boundaries, LOB	N/A	NA	NA	NA	NA	LOC_Os07g40000	NA	NA	NA	NA	NA	NA	NA	NA
XLOC_046908	XLOC_046908	LOC_Os07g41230	Chr7:24699494-24703794	0.683643	5.11789	2.90423	2.82434	0.03255	0.505548	no	esterase, putative, expressed	GO:0008152; GO:0016787; GO:0009058; GO:0006464; GO:0009536	biological_process; molecular_function; biological_process; biological_process; cellular_component	metabolic process; hydrolase activity; biosynthetic process; protein modification process; plastid	TAIR:AT3G29770; TAIR:AT3G29770; TAIR:AT3G29770; TAIR:AT3G29770; TAIR:AT3G29770	PF00561.13	Abhydrolase_1	Domain	N/A	N/A	N/A	NA	NA	NA	NA	LOC_Os07g41230	NA	NA	NA	NA	NA	NA	NA	NA
XLOC_047051	XLOC_047051	LOC_Os07g43800	Chr7:26208528-26209471	2.07965	20.3935	3.2937	3.73343	0.00545	0.204038	no	EF hand family protein, putative, expressed	GO:0005575; GO:0005515; GO:0005488; GO:0008150	cellular_component; molecular_function; molecular_function; biological_process	cellular_component; protein binding; binding; biological_process	TAIR:AT5G39670; TAIR:AT5G39670; TAIR:AT5G39670; TAIR:AT5G39670	PF00036.25	efhand	Domain	N/A	N/A	N/A	NA	NA	NA	NA	LOC_Os07g43800	NA	NA	NA	NA	NA	NA	NA	NA
XLOC_047052	XLOC_047052	LOC_Os07g43810	Chr7:26211744-26214023	9.12678	46.7115	2.3556	3.46585	0.002	0.119413	no	RNA recognition motif containing protein, putative, expressed	GO:0003723; GO:0016020; GO:0009536; GO:0009579; GO:0006950; GO:0009628; GO:0009719	molecular_function; cellular_component; cellular_component; cellular_component; biological_process; biological_process; biological_process	RNA binding; membrane; plastid; thylakoid; response to stress; response to abiotic stimulus; response to endogenous stimulus	TAIR:AT2G37220; TAIR:AT2G37220; TAIR:AT2G37220; TAIR:AT2G37220; TAIR:AT2G37220; TAIR:AT2G37220; TAIR:AT2G37220	PF00076.15	RRM_1	Domain	IPR012677	Nucleotide-binding, alpha-beta plait	Molecular Function: nucleotide binding (GO:0000166)	NA	NA	NA	NA	LOC_Os07g43810	NA	NA	NA	NA	NA	NA	NA	NA
XLOC_047170	XLOC_047170	LOC_Os07g46030	Chr7:27468804-27472349	0.278995	1.80879	2.69671	2.54986	0.041	0.564524	no	expressed protein	GO:0005575; GO:0008150; GO:0005488	cellular_component; biological_process; molecular_function	cellular_component; biological_process; binding	TAIR:AT5G18980; TAIR:AT5G18980; TAIR:AT5G18980	NA	NA	NA	N/A	N/A	N/A	NA	NA	NA	NA	LOC_Os07g46030	NA	NA	NA	NA	NA	NA	NA	NA
XLOC_047171	XLOC_047171	LOC_Os07g46060	Chr7:27483215-27491148	0.653865	8.7635	3.74444	4.32436	0.0024	0.134634	no	expressed protein	GO:0005575; GO:0008150; GO:0005488	cellular_component; biological_process; molecular_function	cellular_component; biological_process; binding	TAIR:AT5G18980; TAIR:AT5G18980; TAIR:AT5G18980	NA	NA	NA	IPR016024	Armadillo-type fold	Molecular Function: binding (GO:0005488)	NA	NA	NA	NA	LOC_Os07g46060	NA	NA	NA	NA	NA	NA	NA	NA
XLOC_047220	XLOC_047220	LOC_Os07g46852	Chr7:28004808-28006379	9.73083	159.679	4.03647	5.35581	5e-05	0.0117035	yes	sex determination protein tasselseed-2, putative, expressed	GO:0005575; GO:0008152; GO:0003824; GO:0005488; GO:0005575; GO:0008152; GO:0003824; GO:0005488; GO:0008152; GO:0005488; GO:0003824; GO:0005575; GO:0008152; GO:0003824; GO:0005488	cellular_component; biological_process; molecular_function; molecular_function; cellular_component; biological_process; molecular_function; molecular_function; biological_process; molecular_function; molecular_function; cellular_component; biological_process; molecular_function; molecular_function	cellular_component; metabolic process; catalytic activity; binding; cellular_component; metabolic process; catalytic activity; binding; metabolic process; binding; catalytic activity; cellular_component; metabolic process; catalytic activity; binding	TAIR:AT4G03140; TAIR:AT4G03140; TAIR:AT4G03140; TAIR:AT4G03140; TAIR:AT4G03140; TAIR:AT4G03140; TAIR:AT4G03140; TAIR:AT4G03140; TAIR:AT3G26760; TAIR:AT3G26760; TAIR:AT3G26760; TAIR:AT4G03140; TAIR:AT4G03140; TAIR:AT4G03140; TAIR:AT4G03140	PF00106.18	adh_short	Domain	IPR016040	NAD(P)-binding domain	Molecular Function: catalytic activity (GO:0003824), Molecular Function: binding (GO:0005488), Biological Process: metabolic process (GO:0008152)	NA	NA	NA	NA	LOC_Os07g46852	PWY-7489	oryzalexin A, B, and C biosynthesis	RXN-15464	EC-1.1.1	GN7F-22148-MONOMER	oryzalexin A/C synthase	GN7F-22148	LOC_Os04g33240.1
XLOC_047264	XLOC_047264	LOC_Os07g47670	Chr7:28484044-28485201	5.71558	37.9066	2.72948	3.47082	0.0033	0.159797	no	hypoxia-responsive family protein, putative, expressed	GO:0003674; GO:0006950; GO:0003674; GO:0006950	molecular_function; biological_process; molecular_function; biological_process	molecular_function; response to stress; molecular_function; response to stress	TAIR:AT5G27760; TAIR:AT5G27760; TAIR:AT5G27760; TAIR:AT5G27760	PF04588.6	HIG_1_N	Family	IPR007667	Hypoxia induced protein, conserved region	N/A	NA	NA	NA	NA	LOC_Os07g47670	NA	NA	NA	NA	NA	NA	NA	NA
XLOC_047282	XLOC_047282	LOC_Os07g47990	Chr7:28660187-28661910	0.710282	5.29442	2.89801	2.76954	0.0163	0.360933	no	peroxidase precursor, putative, expressed	GO:0006950; GO:0005576; GO:0005515; GO:0005618; GO:0003824; GO:0005829; GO:0008152; GO:0006950; GO:0005576; GO:0005515; GO:0005618; GO:0003824; GO:0005829; GO:0008152	biological_process; cellular_component; molecular_function; cellular_component; molecular_function; cellular_component; biological_process; biological_process; cellular_component; molecular_function; cellular_component; molecular_function; cellular_component; biological_process	response to stress; extracellular region; protein binding; cell wall; catalytic activity; cytosol; metabolic process; response to stress; extracellular region; protein binding; cell wall; catalytic activity; cytosol; metabolic process	TAIR:AT5G05340; TAIR:AT5G05340; TAIR:AT5G05340; TAIR:AT5G05340; TAIR:AT5G05340; TAIR:AT5G05340; TAIR:AT5G05340; TAIR:AT5G05340; TAIR:AT5G05340; TAIR:AT5G05340; TAIR:AT5G05340; TAIR:AT5G05340; TAIR:AT5G05340; TAIR:AT5G05340	PF00141.16	peroxidase	Family	IPR002016	Haem peroxidase, plant/fungal/bacterial	Molecular Function: peroxidase activity (GO:0004601), Biological Process: response to oxidative stress (GO:0006979), Molecular Function: heme binding (GO:0020037), Biological Process: oxidation reduction (GO:0055114)	NA	NA	NA	NA	LOC_Os07g47990	NA	NA	NA	NA	NA	NA	NA	NA
XLOC_047284	XLOC_047284	LOC_Os07g48020	Chr7:28673753-28675433	8.05601	169.747	4.39717	6.10593	5e-05	0.0117035	yes	peroxidase precursor, putative, expressed	GO:0006950; GO:0005576; GO:0005515; GO:0005618; GO:0003824; GO:0005829; GO:0008152	biological_process; cellular_component; molecular_function; cellular_component; molecular_function; cellular_component; biological_process	response to stress; extracellular region; protein binding; cell wall; catalytic activity; cytosol; metabolic process	TAIR:AT5G05340; TAIR:AT5G05340; TAIR:AT5G05340; TAIR:AT5G05340; TAIR:AT5G05340; TAIR:AT5G05340; TAIR:AT5G05340	PF00141.16	peroxidase	Family	IPR019794	Peroxidase, active site	N/A	NA	NA	NA	NA	LOC_Os07g48020	NA	NA	NA	NA	NA	NA	NA	NA
XLOC_047305	XLOC_047305	LOC_Os07g48450	Chr7:28985796-28988032	2.82747	38.3959	3.76337	4.99177	5e-05	0.0117035	yes	no apical meristem protein, putative, expressed	GO:0005575; GO:0009058; GO:0006139; GO:0007275; GO:0003700	cellular_component; biological_process; biological_process; biological_process; molecular_function	cellular_component; biosynthetic process; nucleobase, nucleoside, nucleotide and nucleic acid metabolic process; multicellular organismal development; sequence-specific DNA binding transcription factor activity	TAIR:AT3G04070; TAIR:AT3G04070; TAIR:AT3G04070; TAIR:AT3G04070; TAIR:AT3G04070	PF02365.8	NAM	Family	IPR003441	No apical meristem (NAM) protein	Molecular Function: DNA binding (GO:0003677), Biological Process: regulation of transcription (GO:0045449)	NA	NA	NA	NA	LOC_Os07g48450	NA	NA	NA	NA	NA	NA	NA	NA
XLOC_047628	XLOC_047628	LOC_Os07g06800	Chr7:3316485-3318170	6.97761	35.9327	2.36449	3.22164	0.003	0.152157	no	3-oxo-5-alpha-steroid 4-dehydrogenase, putative, expressed	GO:0003824; GO:0009536; GO:0008152; GO:0006629	molecular_function; cellular_component; biological_process; biological_process	catalytic activity; plastid; metabolic process; lipid metabolic process	TAIR:AT5G16010; TAIR:AT5G16010; TAIR:AT5G16010; TAIR:AT5G16010	PF02544.9	Steroid_dh	Family	N/A	N/A	N/A	NA	NA	NA	NA	LOC_Os07g06800	NA	NA	NA	NA	NA	NA	NA	NA
[truncated: 85 more rows]

## Sheet: Down_DEG
test_id	gene_id	gene	locus	N22_FPKM_Value	M-507_FPKM_Value	log2(fold_change)	test_stat	p_value	q_value	significant	description(phytozome)	GO_ID	GO_Ontology	GO_Term	GO_TAIR_ID	PFAM_hmm_acc	PFAM_hmm_name	PFAM_hmm_type	INTERPRO_ipr_acc	INTERPRO_ipr_desc	INTERPRO_ipr_go	Entry(uniprot)	Cross-reference(GeneID)	Cross-reference(RefSeq)	Cross-reference(KEGG)	Query_sequence_Id(OryzaCyc)	Pathway-id(OryzaCyc)	Pathway-name(OryzaCyc)	Reaction-id(OryzaCyc)	EC(OryzaCyc)	Protein-id(OryzaCyc)	Protein-name(OryzaCyc)	Gene-id(OryzaCyc)	Gene-name(OryzaCyc)
[truncated: 234 more rows]
