# Supplementary material for: RNA-Seq, co-expression network and eQTL analysis identify key genes for chlorophyll and carbon metabolism in rice
Source: Research Square preprint supplement (doi:10.21203/rs.3.rs-2517802/v1), 2023-02-08
Supplement: Supplementary file 3 [file 17bfbdfef9edf6f364d352d8.xlsx]

## Sheet: Up
GO Found=805		Query	KO	Definition	Score	Second best			KO	Definition			Not found	Found		Not found		Accession	Description		expressed protein	45
LOC_Os01g02390.1		LOC_Os07g12640.1 (255)	K00006	GPD1; glycerol-3-phosphate dehydrogenase (NAD+) [EC:1.1.1.8]	155				K00430	E1.11.1.7; peroxidase [EC:1.11.1.7]	14		LOC_Os01g02390.1	LOC_Os07g12640.1		LOC_Os01g02390		LOC_Os01g02390.1	protein|protein kinase domain containing protein, expressed		cytochrome P450, putative, expressed	9
LOC_Os01g02390.2		LOC_Os03g55070.1 (481)	K00012	UGDH, ugd; UDPglucose 6-dehydrogenase [EC:1.1.1.22]	530				K09286	EREBP; EREBP-like factor (APETALA2/ethylene-responsive element binding protein (AP2/EREBP) transcription factors)	14		LOC_Os01g02390.2	LOC_Os03g55070.1		LOC_Os01g02550		LOC_Os01g02390.2	protein|protein kinase domain containing protein, expressed		no apical meristem protein, putative, expressed	7
LOC_Os01g02550.1		LOC_Os03g55070.2 (481)	K00012	UGDH, ugd; UDPglucose 6-dehydrogenase [EC:1.1.1.22]	530				K01183	E3.2.1.14; chitinase [EC:3.2.1.14]	9		LOC_Os01g02550.1	LOC_Os03g55070.2		LOC_Os01g02810		LOC_Os01g02550.1	protein|protein kinase domain containing protein, expressed		receptor-like protein kinase precursor, putative, expressed	7
LOC_Os01g02810.1		LOC_Os02g01510.1 (393)	K00016	LDH, ldh; L-lactate dehydrogenase [EC:1.1.1.27]	245				K14638	SLC15A3_4, PHT; solute carrier family 15 (peptide/histidine transporter), member 3/4	9		LOC_Os01g02810.1	LOC_Os02g01510.1		LOC_Os01g02900		LOC_Os01g02810.1	protein|resistance-related receptor-like kinase, putative, expressed		protein kinase domain containing protein, expressed	6
LOC_Os01g02900.1		LOC_Os02g38840.1 (518)	K00036	G6PD, zwf; glucose-6-phosphate 1-dehydrogenase [EC:1.1.1.49 1.1.1.363]	485				K00826	E2.6.1.42, ilvE; branched-chain amino acid aminotransferase [EC:2.6.1.42]	7		LOC_Os01g02900.1	LOC_Os02g38840.1		LOC_Os01g03870		LOC_Os01g02900.1	protein|glycosyltransferase, putative, expressed		tyrosine protein kinase domain containing protein, putative, expressed	6
LOC_Os01g02900.2		LOC_Os02g38840.2 (518)	K00036	G6PD, zwf; glucose-6-phosphate 1-dehydrogenase [EC:1.1.1.49 1.1.1.363]	485				K21483	SAMT; salicylate 1-O-methyltransferase [EC:2.1.1.274]	7		LOC_Os01g02900.2	LOC_Os02g38840.2		LOC_Os01g04280		LOC_Os01g02900.2	protein|glycosyltransferase, putative, expressed		NB-ARC domain containing protein, expressed	5
LOC_Os01g03020.1		LOC_Os02g09490.1 (364)	K00083	CAD; cinnamyl-alcohol dehydrogenase [EC:1.1.1.195]	315				K24028	DMR6, DLO; salicylic acid 3-hydroxylase [EC:1.14.11.-]	6		LOC_Os01g03870.1	LOC_Os02g09490.1		LOC_Os01g04530		LOC_Os01g03870.1	protein|expressed protein		SHR5-receptor-like kinase, putative, expressed	5
LOC_Os01g03020.2		LOC_Os08g02230.1 (590)	K00103	GULO; L-gulonolactone oxidase [EC:1.1.3.8]	416				K13065	E2.3.1.133, HCT; shikimate O-hydroxycinnamoyltransferase [EC:2.3.1.133]	6		LOC_Os01g04280.1	LOC_Os08g02230.1		LOC_Os01g04540		LOC_Os01g04280.1	protein|calmodulin binding protein, putative, expressed		glycosyl hydrolases family 17, putative, expressed	4
LOC_Os01g03870.1		LOC_Os03g08999.1 (307)	K00121	frmA, ADH5, adhC; S-(hydroxymethyl)glutathione dehydrogenase / alcohol dehydrogenase [EC:1.1.1.284 1.1.1.1]	184				K01897	ACSL, fadD; long-chain acyl-CoA synthetase [EC:6.2.1.3]	5		LOC_Os01g04530.1	LOC_Os03g08999.1		LOC_Os01g04550		LOC_Os01g04530.1	protein|expressed protein		helix-loop-helix DNA-binding domain containing protein, expressed	4
LOC_Os01g04280.1		LOC_Os03g09020.1 (361)	K00121	frmA, ADH5, adhC; S-(hydroxymethyl)glutathione dehydrogenase / alcohol dehydrogenase [EC:1.1.1.284 1.1.1.1]	217				K00128	ALDH; aldehyde dehydrogenase (NAD+) [EC:1.2.1.3]	5		LOC_Os01g04540.1	LOC_Os03g09020.1		LOC_Os01g06520		LOC_Os01g04540.1	protein|serine/threonine-protein kinase At1g18390 precursor, putative, expressed		UDP-glucoronosyl and UDP-glucosyl transferase domain containing protein, expressed	4
LOC_Os01g04530.1		LOC_Os02g49720.1 (584)	K00128	ALDH; aldehyde dehydrogenase (NAD+) [EC:1.2.1.3]	541				K03549	kup; KUP system potassium uptake protein	5		LOC_Os01g04550.1	LOC_Os02g49720.1		LOC_Os01g06640		LOC_Os01g04550.1	protein|expressed protein		ATPase, putative, expressed	3
LOC_Os01g04540.1		LOC_Os02g49720.2 (562)	K00128	ALDH; aldehyde dehydrogenase (NAD+) [EC:1.2.1.3]	566				K13457	RPM1, RPS3; disease resistance protein RPM1	5		LOC_Os01g06520.1	LOC_Os02g49720.2		LOC_Os01g07970		LOC_Os01g06520.1	protein|verticillium wilt disease resistance protein, putative, expressed		calmodulin binding protein, putative, expressed	3
LOC_Os01g04550.1		LOC_Os02g49720.3 (554)	K00128	ALDH; aldehyde dehydrogenase (NAD+) [EC:1.2.1.3]	578				K00235	SDHB, SDH2; succinate dehydrogenase (ubiquinone) iron-sulfur subunit [EC:1.3.5.1]	5		LOC_Os01g06640.1	LOC_Os02g49720.3		LOC_Os01g09010		LOC_Os01g06640.1	protein|basic helix-loop-helix, putative, expressed		glucan endo-1,3-beta-glucosidase precursor, putative, expressed	3
LOC_Os01g04750.1		LOC_Os02g49720.6 (422)	K00128	ALDH; aldehyde dehydrogenase (NAD+) [EC:1.2.1.3]	420				K14157	AASS; alpha-aminoadipic semialdehyde synthase [EC:1.5.1.8 1.5.1.9]	4		LOC_Os01g06640.2	LOC_Os02g49720.6		LOC_Os01g09100		LOC_Os01g06640.2	protein|basic helix-loop-helix, putative, expressed		hydrolase, alpha/beta fold family domain containing protein, expressed	3
LOC_Os01g04800.1		LOC_Os02g49720.7 (414)	K00128	ALDH; aldehyde dehydrogenase (NAD+) [EC:1.2.1.3]	308				K01953	asnB, ASNS; asparagine synthase (glutamine-hydrolysing) [EC:6.3.5.4]	4		LOC_Os01g06640.3	LOC_Os02g49720.7		LOC_Os01g10990		LOC_Os01g07970.1	protein|expressed protein		NBS-LRR disease resistance protein, putative, expressed	3
LOC_Os01g05060.1		LOC_Os08g02640.1 (351)	K00235	SDHB, SDH2; succinate dehydrogenase (ubiquinone) iron-sulfur subunit [EC:1.3.5.1]	89				K20547	CHIB; basic endochitinase B [EC:3.2.1.14]	4		LOC_Os01g07970.1	LOC_Os08g02640.1		LOC_Os01g11160		LOC_Os01g09010.1	protein|transferase family protein, putative, expressed		sex determination protein tasselseed-2, putative, expressed	3
LOC_Os01g06520.1		LOC_Os08g02640.2 (282)	K00235	SDHB, SDH2; succinate dehydrogenase (ubiquinone) iron-sulfur subunit [EC:1.3.5.1]	251				K01358	clpP, CLPP; ATP-dependent Clp protease, protease subunit [EC:3.4.21.92]	4		LOC_Os01g09010.1	LOC_Os08g02640.2		LOC_Os01g12760		LOC_Os01g09100.1	protein|WRKY10, expressed		transferase family protein, putative, expressed	3
LOC_Os01g06640.1		LOC_Os08g02640.3 (282)	K00235	SDHB, SDH2; succinate dehydrogenase (ubiquinone) iron-sulfur subunit [EC:1.3.5.1]	251				K08235	E2.4.1.207; xyloglucan:xyloglucosyl transferase [EC:2.4.1.207]	4		LOC_Os01g09100.1	LOC_Os08g02640.3		LOC_Os01g12770		LOC_Os01g10990.1	protein|integral membrane protein DUF6 containing protein, expressed		universal stress protein domain containing protein, putative, expressed	3
LOC_Os01g06640.2		LOC_Os08g02640.4 (282)	K00235	SDHB, SDH2; succinate dehydrogenase (ubiquinone) iron-sulfur subunit [EC:1.3.5.1]	251				K04121	E4.2.3.19; ent-kaurene synthase [EC:4.2.3.19]	4		LOC_Os01g10990.1	LOC_Os08g02640.4		LOC_Os01g14410		LOC_Os01g11160.1	protein|amino acid permease family protein, putative, expressed		amino acid permease family protein, putative, expressed	2
LOC_Os01g06640.3		LOC_Os08g02640.5 (282)	K00235	SDHB, SDH2; succinate dehydrogenase (ubiquinone) iron-sulfur subunit [EC:1.3.5.1]	251				K00799	GST, gst; glutathione S-transferase [EC:2.5.1.18]	4		LOC_Os01g11160.1	LOC_Os08g02640.5		LOC_Os01g15000		LOC_Os01g12760.1	protein|cytochrome P450, putative, expressed		cupin domain containing protein, expressed	2
LOC_Os01g07970.1		LOC_Os09g32290.1 (147)	K00306	PIPOX; sarcosine oxidase / L-pipecolate oxidase [EC:1.5.3.1 1.5.3.7]	28				K24193	STP; MFS transporter, SP family, sugar:H+ symporter	4		LOC_Os01g12760.1	LOC_Os09g32290.1		LOC_Os01g15530		LOC_Os01g12770.1	protein|cytochrome P450, putative, expressed		cysteine-rich repeat secretory protein 55 precursor, putative, expressed	2
LOC_Os01g09010.1		LOC_Os09g32290.2 (417)	K00306	PIPOX; sarcosine oxidase / L-pipecolate oxidase [EC:1.5.3.1 1.5.3.7]	283				K01209	abfA; alpha-L-arabinofuranosidase [EC:3.2.1.55]	3		LOC_Os01g12770.1	LOC_Os09g32290.2		LOC_Os01g15540		LOC_Os01g14410.1	protein|early light-induced protein, chloroplast precursor, putative, expressed		cytochrome P450 72A1, putative, expressed	2
LOC_Os01g09100.1		LOC_Os01g22249.1 (348)	K00430	E1.11.1.7; peroxidase [EC:1.11.1.7]	279				K00827	AGXT2; alanine-glyoxylate transaminase / (R)-3-amino-2-methylpropionate-pyruvate transaminase [EC:2.6.1.44 2.6.1.40]	3		LOC_Os01g14410.1	LOC_Os01g22249.1		LOC_Os01g18584		LOC_Os01g15000.1	protein|lipase, putative, expressed		DC1 domain, putative, expressed	2
LOC_Os01g10990.1		LOC_Os01g22370.1 (352)	K00430	E1.11.1.7; peroxidase [EC:1.11.1.7]	288				K01637	E4.1.3.1, aceA; isocitrate lyase [EC:4.1.3.1]	3		LOC_Os01g15000.1	LOC_Os01g22370.1		LOC_Os01g19820		LOC_Os01g15530.1	protein|tetratricopeptide-like helical, putative, expressed		disease resistance RPP13-like protein 1, putative, expressed	2
LOC_Os01g11160.1		LOC_Os01g73170.1 (378)	K00430	E1.11.1.7; peroxidase [EC:1.11.1.7]	308				K04078	groES, HSPE1; chaperonin GroES	3		LOC_Os01g15530.1	LOC_Os01g73170.1		LOC_Os01g22900		LOC_Os01g15540.1	protein|kinesin motor domain containing protein, putative, expressed		D-mannose binding lectin family protein, expressed	2
LOC_Os01g12710.1		LOC_Os01g73200.1 (357)	K00430	E1.11.1.7; peroxidase [EC:1.11.1.7]	298				K03781	katE, CAT, catB, srpA; catalase [EC:1.11.1.6]	3		LOC_Os01g15540.1	LOC_Os01g73200.1		LOC_Os01g29330		LOC_Os01g18584.1	protein|WRKY9, expressed		early light-induced protein, chloroplast precursor, putative, expressed	2
LOC_Os01g12710.2		LOC_Os10g02070.1 (327)	K00430	E1.11.1.7; peroxidase [EC:1.11.1.7]	345				K15397	KCS; 3-ketoacyl-CoA synthase [EC:2.3.1.199]	3		LOC_Os01g18584.1	LOC_Os10g02070.1		LOC_Os01g38610		LOC_Os01g19820.1	protein|universal stress protein domain containing protein, putative, expressed		EF hand family protein, putative, expressed	2
LOC_Os01g12760.1		LOC_Os07g47990.1 (319)	K00430	E1.11.1.7; peroxidase [EC:1.11.1.7]	337				K01265	map; methionyl aminopeptidase [EC:3.4.11.18]	3		LOC_Os01g19820.1	LOC_Os07g47990.1		LOC_Os01g39330		LOC_Os01g19820.2	protein|universal stress protein domain containing protein, putative, expressed		GEM, putative, expressed	2
LOC_Os01g12770.1		LOC_Os07g47990.2 (253)	K00430	E1.11.1.7; peroxidase [EC:1.11.1.7]	220				K09422	MYBP; transcription factor MYB, plant	3		LOC_Os01g19820.2	LOC_Os07g47990.2		LOC_Os01g41240		LOC_Os01g19820.3	protein|universal stress protein domain containing protein, putative, expressed		gibberellin receptor GID1L2, putative, expressed	2
LOC_Os01g14410.1		LOC_Os07g48020.1 (318)	K00430	E1.11.1.7; peroxidase [EC:1.11.1.7]	319				K01006	ppdK; pyruvate, orthophosphate dikinase [EC:2.7.9.1]	3		LOC_Os01g19820.3	LOC_Os07g48020.1		LOC_Os01g42410		LOC_Os01g19820.4	protein|universal stress protein domain containing protein, putative, expressed		leucine-rich repeat family protein, putative, expressed	2
LOC_Os01g15000.1		LOC_Os04g59150.1 (347)	K00430	E1.11.1.7; peroxidase [EC:1.11.1.7]	244				K13449	PR1; pathogenesis-related protein 1	3		LOC_Os01g19820.4	LOC_Os04g59150.1		LOC_Os01g42790		LOC_Os01g22900.1	protein|neutral/alkaline invertase, putative, expressed		leucine-rich repeat receptor protein kinase EXS precursor, putative, expressed	2
LOC_Os01g15530.1		LOC_Os04g59150.2 (292)	K00430	E1.11.1.7; peroxidase [EC:1.11.1.7]	170				K06692	PSMD5; 26S proteasome non-ATPase regulatory subunit 5	3		LOC_Os01g22900.1	LOC_Os04g59150.2		LOC_Os01g42860		LOC_Os01g22900.2	protein|neutral/alkaline invertase, putative, expressed		NAC domain transcription factor, putative, expressed	2
LOC_Os01g15540.1		LOC_Os04g59190.1 (341)	K00430	E1.11.1.7; peroxidase [EC:1.11.1.7]	181				K10144	RCHY1, PIRH2; RING finger and CHY zinc finger domain-containing protein 1 [EC:2.3.2.27]	3		LOC_Os01g22900.2	LOC_Os04g59190.1		LOC_Os01g43750		LOC_Os01g22900.3	protein|neutral/alkaline invertase, putative, expressed		osmotin, putative, expressed	2
LOC_Os01g18584.1		LOC_Os04g59200.1 (353)	K00430	E1.11.1.7; peroxidase [EC:1.11.1.7]	190				K02881	RP-L18, MRPL18, rplR; large subunit ribosomal protein L18	3		LOC_Os01g22900.3	LOC_Os04g59200.1		LOC_Os01g43760		LOC_Os01g29330.1	protein|expressed protein		plant protein of unknown function domain containing protein, expressed	2
LOC_Os01g18670.1		LOC_Os06g20150.1 (332)	K00430	E1.11.1.7; peroxidase [EC:1.11.1.7]	323				K14209	SLC36A, PAT; solute carrier family 36 (proton-coupled amino acid transporter)	3		LOC_Os01g29330.1	LOC_Os06g20150.1		LOC_Os01g48000		LOC_Os01g38610.1	protein|helix-loop-helix DNA-binding domain containing protein, expressed		senescence-induced receptor-like serine/threonine-protein kinase precursor, putative, expressed	2
LOC_Os01g19820.1		LOC_Os06g35520.1 (364)	K00430	E1.11.1.7; peroxidase [EC:1.11.1.7]	276				K14207	SLC38A2, SNAT2; solute carrier family 38 (sodium-coupled neutral amino acid transporter), member 2	3		LOC_Os01g38610.1	LOC_Os06g35520.1		LOC_Os01g48610		LOC_Os01g39330.1	protein|helix-loop-helix DNA-binding domain containing protein, expressed		serine/threonine-protein kinase receptor precursor, putative, expressed	2
LOC_Os01g19820.2		LOC_Os03g17690.1 (251)	K00434	E1.11.1.11; L-ascorbate peroxidase [EC:1.11.1.11]	338				K01638	aceB, glcB; malate synthase [EC:2.3.3.9]	2		LOC_Os01g39330.1	LOC_Os03g17690.1		LOC_Os01g50910		LOC_Os01g41240.1	protein|hydrolase, alpha/beta fold family domain containing protein, expressed		thaumatin, putative, expressed	2
LOC_Os01g19820.3		LOC_Os03g17690.2 (192)	K00434	E1.11.1.11; L-ascorbate peroxidase [EC:1.11.1.11]	201				K22390	ACP7; acid phosphatase type 7	2		LOC_Os01g41240.1	LOC_Os03g17690.2		LOC_Os01g51570		LOC_Os01g42410.1	protein|pleiotropic drug resistance protein, putative, expressed		uncharacterized Cys-rich domain containing protein, putative, expressed	2
LOC_Os01g19820.4		LOC_Os08g39840.1 (925)	K00454	LOX2S; lipoxygenase [EC:1.13.11.12]	865				K10664	ATL6S; E3 ubiquitin-protein ligase ATL6/9/15/31/42/55 [EC:2.3.2.27]	2		LOC_Os01g42410.1	LOC_Os08g39840.1		LOC_Os01g53090		LOC_Os01g42790.1	protein|xylem cysteine proteinase 2 precursor, putative, expressed		wall-associated receptor kinase 3 precursor, putative, expressed	2
LOC_Os01g22249.1		LOC_Os06g36560.1 (309)	K00469	MIOX; inositol oxygenase [EC:1.13.99.1]	307				K13448	CML; calcium-binding protein CML	2		LOC_Os01g42790.1	LOC_Os06g36560.1		LOC_Os01g53730		LOC_Os01g42860.1	protein|inhibitor I family protein, putative, expressed		zinc finger, C3HC4 type domain containing protein, expressed	2
LOC_Os01g22370.1		LOC_Os06g36560.2 (274)	K00469	MIOX; inositol oxygenase [EC:1.13.99.1]	243				K08360	CYB561; cytochrome b-561 [EC:7.2.1.3]	2		LOC_Os01g42860.1	LOC_Os06g36560.2		LOC_Os01g55290		LOC_Os01g43750.1	protein|cytochrome P450 72A1, putative, expressed		1-aminocyclopropane-1-carboxylate oxidase 2, putative, expressed	1
LOC_Os01g22900.1		LOC_Os08g33440.1 (476)	K00627	DLAT, aceF, pdhC; pyruvate dehydrogenase E2 component (dihydrolipoamide acetyltransferase) [EC:2.3.1.12]	344				K20624	CYP94C1; 12-hydroxyjasmonoyl-L-amino acid 12-hydroxylase / fatty acid hydroxylase [EC:1.14.14.49]	2		LOC_Os01g43750.1	LOC_Os08g33440.1		LOC_Os01g56450		LOC_Os01g43760.1	protein|cytochrome P450 72A1, putative, expressed		3-oxo-5-alpha-steroid 4-dehydrogenase, putative, expressed	1
LOC_Os01g22900.2		LOC_Os02g56300.1 (482)	K00654	SPT; serine palmitoyltransferase [EC:2.3.1.50]	458				K00434	E1.11.1.11; L-ascorbate peroxidase [EC:1.11.1.11]	2		LOC_Os01g43760.1	LOC_Os02g56300.1		LOC_Os01g59000		LOC_Os01g48000.1	protein|S-locus-like receptor protein kinase, putative, expressed		ABC transporter, ATP-binding protein, putative, expressed	1
LOC_Os01g22900.3		LOC_Os01g70770.1 (222)	K00799	GST, gst; glutathione S-transferase [EC:2.5.1.18]	149				K06617	E2.4.1.82; raffinose synthase [EC:2.4.1.82]	2		LOC_Os01g48000.1	LOC_Os01g70770.1		LOC_Os01g59840		LOC_Os01g48610.1	protein|expressed protein		acetyltransferase, GNAT family, putative, expressed	1
LOC_Os01g28450.1		LOC_Os01g72170.1 (239)	K00799	GST, gst; glutathione S-transferase [EC:2.5.1.18]	126				K12125	ELF3; protein EARLY FLOWERING 3	2		LOC_Os01g48610.1	LOC_Os01g72170.1		LOC_Os01g60020		LOC_Os01g50910.1	protein|late embryogenesis abundant protein, group 3, putative, expressed		ACT domain containing protein, expressed	1
LOC_Os01g29330.1		LOC_Os10g38360.1 (234)	K00799	GST, gst; glutathione S-transferase [EC:2.5.1.18]	122				K09458	fabF, OXSM, CEM1; 3-oxoacyl-[acyl-carrier-protein] synthase II [EC:2.3.1.179]	2		LOC_Os01g50910.1	LOC_Os10g38360.1		LOC_Os01g60860		LOC_Os01g50910.2	protein|late embryogenesis abundant protein, group 3, putative, expressed		acyl carrier protein, putative, expressed	1
LOC_Os01g36070.1		LOC_Os10g38489.1 (234)	K00799	GST, gst; glutathione S-transferase [EC:2.5.1.18]	134				K00121	frmA, ADH5, adhC; S-(hydroxymethyl)glutathione dehydrogenase / alcohol dehydrogenase [EC:1.1.1.284 1.1.1.1]	2		LOC_Os01g50910.2	LOC_Os10g38489.1		LOC_Os01g61230		LOC_Os01g51570.1	protein|glycosyl hydrolases family 17, putative, expressed		aminotransferase, classes I and II, domain containing protein, expressed	1
LOC_Os01g38530.1		LOC_Os03g12890.1 (417)	K00826	E2.6.1.42, ilvE; branched-chain amino acid aminotransferase [EC:2.6.1.42]	396				K00036	G6PD, zwf; glucose-6-phosphate 1-dehydrogenase [EC:1.1.1.49 1.1.1.363]	2		LOC_Os01g51570.1	LOC_Os03g12890.1		LOC_Os01g61990		LOC_Os01g53090.1	protein|pathogen-related protein, putative, expressed		AN1-like zinc finger domain containing protein, expressed	1
LOC_Os01g38530.2		LOC_Os03g12890.2 (416)	K00826	E2.6.1.42, ilvE; branched-chain amino acid aminotransferase [EC:2.6.1.42]	400				K05282	GA20ox; gibberellin-44 dioxygenase [EC:1.14.11.12]	2		LOC_Os01g53090.1	LOC_Os03g12890.2		LOC_Os01g63690		LOC_Os01g53730.1	protein|expressed protein		ankyrin repeat-containing protein, putative, expressed	1
LOC_Os01g38610.1		LOC_Os03g12890.3 (322)	K00826	E2.6.1.42, ilvE; branched-chain amino acid aminotransferase [EC:2.6.1.42]	248				K00975	glgC; glucose-1-phosphate adenylyltransferase [EC:2.7.7.27]	2		LOC_Os01g53730.1	LOC_Os03g12890.3		LOC_Os01g69870		LOC_Os01g55290.1	protein|PPR repeat domain containing protein, putative, expressed		antitermination NusB domain-containing protein, putative, expressed	1
LOC_Os01g39330.1		LOC_Os03g12890.4 (298)	K00826	E2.6.1.42, ilvE; branched-chain amino acid aminotransferase [EC:2.6.1.42]	198				K03676	grxC, GLRX, GLRX2; glutaredoxin 3	2		LOC_Os01g55290.1	LOC_Os03g12890.4		LOC_Os01g71340		LOC_Os01g55290.2	protein|PPR repeat domain containing protein, putative, expressed		aspartic proteinase nepenthesin, putative, expressed	1
LOC_Os01g41240.1		LOC_Os03g12890.5 (298)	K00826	E2.6.1.42, ilvE; branched-chain amino acid aminotransferase [EC:2.6.1.42]	198				K07025	putative hydrolase of the HAD superfamily	2		LOC_Os01g55290.2	LOC_Os03g12890.5		LOC_Os01g71350		LOC_Os01g55290.3	protein|PPR repeat domain containing protein, putative, expressed		aspartic proteinase nepenthesin-1 precursor, putative, expressed	1
LOC_Os01g42410.1		LOC_Os04g47190.1 (411)	K00826	E2.6.1.42, ilvE; branched-chain amino acid aminotransferase [EC:2.6.1.42]	371				K15404	K15404, CER1; aldehyde decarbonylase [EC:4.1.99.5]	2		LOC_Os01g55290.3	LOC_Os04g47190.1		LOC_Os01g73500		LOC_Os01g56450.1	protein|DUF567 domain containing protein, putative, expressed		ATPase 3, putative, expressed	1
LOC_Os01g42790.1		LOC_Os04g47190.2 (411)	K00826	E2.6.1.42, ilvE; branched-chain amino acid aminotransferase [EC:2.6.1.42]	371				K01869	LARS, leuS; leucyl-tRNA synthetase [EC:6.1.1.4]	2		LOC_Os01g56450.1	LOC_Os04g47190.2		LOC_Os02g04230		LOC_Os01g59000.1	protein|cytochrome P450, putative, expressed		ATPase, AAA family domain containing protein, expressed	1
LOC_Os01g42860.1		LOC_Os03g07570.1 (487)	K00827	AGXT2; alanine-glyoxylate transaminase / (R)-3-amino-2-methylpropionate-pyruvate transaminase [EC:2.6.1.44 2.6.1.40]	487				K01649	leuA, IMS; 2-isopropylmalate synthase [EC:2.3.3.13]	2		LOC_Os01g59000.1	LOC_Os03g07570.1		LOC_Os02g05470		LOC_Os01g59840.1	protein|Os1bglu3 - beta-glucosidase homologue, similar to G. max isohydroxyurate hydrolase, expressed		ATP-dependent protease, putative, expressed	1
LOC_Os01g43750.1		LOC_Os03g07570.3 (307)	K00827	AGXT2; alanine-glyoxylate transaminase / (R)-3-amino-2-methylpropionate-pyruvate transaminase [EC:2.6.1.44 2.6.1.40]	250				K00469	MIOX; inositol oxygenase [EC:1.13.99.1]	2		LOC_Os01g59840.1	LOC_Os03g07570.3		LOC_Os02g10660		LOC_Os01g60020.1	protein|NAC domain transcription factor, putative, expressed		avr9/Cf-9 rapidly elicited protein, putative, expressed	1
LOC_Os01g43760.1		LOC_Os03g07570.4 (487)	K00827	AGXT2; alanine-glyoxylate transaminase / (R)-3-amino-2-methylpropionate-pyruvate transaminase [EC:2.6.1.44 2.6.1.40]	487				K22139	MPC2; mitochondrial pyruvate carrier 2	2		LOC_Os01g60020.1	LOC_Os03g07570.4		LOC_Os02g11980		LOC_Os01g60860.1	protein|spotted leaf 11, putative, expressed		basic helix-loop-helix, putative, expressed	1
LOC_Os01g47070.1		LOC_Os03g06200.1 (427)	K00831	serC, PSAT1; phosphoserine aminotransferase [EC:2.6.1.52]	501				K13606	NOL, NYC1; chlorophyll(ide) b reductase [EC:1.1.1.294]	2		LOC_Os01g60860.1	LOC_Os03g06200.1		LOC_Os02g12010		LOC_Os01g61230.1	protein|dihydroflavonol-4-reductase, putative, expressed		beta-amylase, putative, expressed	1
LOC_Os01g47330.1		LOC_Os05g09500.1 (464)	K00844	HK; hexokinase [EC:2.7.1.1]	361				K17609	NXN; nucleoredoxin [EC:1.8.1.8]	2		LOC_Os01g61230.1	LOC_Os05g09500.1		LOC_Os02g12030		LOC_Os01g61990.1	protein|ankyrin repeat-containing protein, putative, expressed		bHelix-loop-helix transcription factor, putative, expressed	1
LOC_Os01g48000.1		LOC_Os02g32370.1 (296)	K00915	IPMK, IPK2; inositol-polyphosphate multikinase [EC:2.7.1.140 2.7.1.151]	253				K10775	PAL; phenylalanine ammonia-lyase [EC:4.3.1.24]	2		LOC_Os01g61990.1	LOC_Os02g32370.1		LOC_Os02g12040		LOC_Os01g61990.2	protein|ankyrin repeat-containing protein, putative, expressed		BTBZ4 - Bric-a-Brac, Tramtrack, Broad Complex BTB domain with TAZ zinc finger and Calmodulin-binding domains, expressed	1
LOC_Os01g48610.1		LOC_Os05g50380.1 (520)	K00975	glgC; glucose-1-phosphate adenylyltransferase [EC:2.7.7.27]	401				K24139	PILS, ECM3; auxin efflux carrier family protein	2		LOC_Os01g61990.2	LOC_Os05g50380.1		LOC_Os02g16060		LOC_Os01g63690.1	protein|hs1, putative, expressed		bZIP transcription factor domain containing protein, expressed	1
LOC_Os01g49320.1		LOC_Os05g50380.2 (520)	K00975	glgC; glucose-1-phosphate adenylyltransferase [EC:2.7.7.27]	401				K00306	PIPOX; sarcosine oxidase / L-pipecolate oxidase [EC:1.5.3.1 1.5.3.7]	2		LOC_Os01g63690.1	LOC_Os05g50380.2		LOC_Os02g16270		LOC_Os01g69870.1	protein|expressed protein		C2 domain containing protein, putative, expressed	1
LOC_Os01g50910.1		LOC_Os03g31750.1 (888)	K01006	ppdK; pyruvate, orthophosphate dikinase [EC:2.7.9.1]	817				K18213	PRORP; proteinaceous RNase P [EC:3.1.26.5]	2		LOC_Os01g69870.1	LOC_Os03g31750.1		LOC_Os02g18070		LOC_Os01g69870.2	protein|expressed protein		cadmium tolerance factor, putative, expressed	1
LOC_Os01g50910.2		LOC_Os03g31750.2 (729)	K01006	ppdK; pyruvate, orthophosphate dikinase [EC:2.7.9.1]	574				K17991	PXG; peroxygenase [EC:1.11.2.3]	2		LOC_Os01g69870.2	LOC_Os03g31750.2		LOC_Os02g18080		LOC_Os01g71340.1	protein|glycosyl hydrolases family 17, putative, expressed		CCT motif family protein, expressed	1
LOC_Os01g51060.1		LOC_Os03g31750.3 (893)	K01006	ppdK; pyruvate, orthophosphate dikinase [EC:2.7.9.1]	814				K09287	RAV; RAV-like factor (ETHYLENE RESPONSE DNA BINDING FACTORS)	2		LOC_Os01g71340.1	LOC_Os03g31750.3		LOC_Os02g32520		LOC_Os01g71350.1	protein|glycosyl hydrolases family 17, putative, expressed		CCT/B-box zinc finger protein, putative, expressed	1
LOC_Os01g51570.1		LOC_Os10g41550.1 (545)	K01177	E3.2.1.2; beta-amylase [EC:3.2.1.2]	616				K02871	RP-L13, MRPL13, rplM; large subunit ribosomal protein L13	2		LOC_Os01g71350.1	LOC_Os10g41550.1		LOC_Os02g34790		LOC_Os01g73500.1	protein|expressed protein		CGMC_MAPKCMGC_2.7 - CGMC includes CDA, MAPK, GSK3, and CLKC kinases, expressed	1
LOC_Os01g52070.1		LOC_Os01g47070.1 (302)	K01183	E3.2.1.14; chitinase [EC:3.2.1.14]	247				K02887	RP-L20, MRPL20, rplT; large subunit ribosomal protein L20	2		LOC_Os01g73500.1	LOC_Os01g47070.1		LOC_Os02g35320		LOC_Os01g73500.2	protein|expressed protein		COBRA, putative, expressed	1
LOC_Os01g52240.1		LOC_Os01g49320.1 (303)	K01183	E3.2.1.14; chitinase [EC:3.2.1.14]	261				K13691	SGT1; pathogen-inducible salicylic acid glucosyltransferase [EC:2.4.1.-]	2		LOC_Os01g73500.2	LOC_Os01g49320.1		LOC_Os02g36619		LOC_Os02g04230.1	protein|CGMC_MAPKCMGC_2.7 - CGMC includes CDA, MAPK, GSK3, and CLKC kinases, expressed		cysteine-rich receptor-like protein kinase 12 precursor, putative, expressed	1
LOC_Os01g52710.1		LOC_Os01g64110.1 (306)	K01183	E3.2.1.14; chitinase [EC:3.2.1.14]	319				K15382	SLC50A, SWEET; solute carrier family 50 (sugar transporter)	2		LOC_Os02g04230.1	LOC_Os01g64110.1		LOC_Os02g36940		LOC_Os02g04230.2	protein|CGMC_MAPKCMGC_2.7 - CGMC includes CDA, MAPK, GSK3, and CLKC kinases, expressed		cysteine-rich receptor-like protein kinase 25 precursor, putative, expressed	1
LOC_Os01g53090.1		LOC_Os11g47560.1 (285)	K01183	E3.2.1.14; chitinase [EC:3.2.1.14]	173				K08486	STX1B_2_3; syntaxin 1B/2/3	2		LOC_Os02g04230.2	LOC_Os11g47560.1		LOC_Os02g38040		LOC_Os02g04230.3	protein|CGMC_MAPKCMGC_2.7 - CGMC includes CDA, MAPK, GSK3, and CLKC kinases, expressed		cytidine deaminase, putative, expressed	1
LOC_Os01g53730.1		LOC_Os11g47600.1 (302)	K01183	E3.2.1.14; chitinase [EC:3.2.1.14]	173				K00012	UGDH, ugd; UDPglucose 6-dehydrogenase [EC:1.1.1.22]	2		LOC_Os02g04230.3	LOC_Os11g47600.1		LOC_Os02g41840		LOC_Os02g05470.1	protein|CCT motif family protein, expressed		cytochrome b6f complex subunit, putative, expressed	1
LOC_Os01g54540.1		LOC_Os08g40680.1 (298)	K01183	E3.2.1.14; chitinase [EC:3.2.1.14]	154				K13424	WRKY33; WRKY transcription factor 33	2		LOC_Os02g05470.1	LOC_Os08g40680.1		LOC_Os02g42440		LOC_Os02g05470.2	protein|CCT motif family protein, expressed		cytochrome P450 71E1, putative, expressed	1
LOC_Os01g54540.2		LOC_Os08g40690.1 (316)	K01183	E3.2.1.14; chitinase [EC:3.2.1.14]	165				K01904	4CL; 4-coumarate--CoA ligase [EC:6.2.1.12]	1		LOC_Os02g05470.2	LOC_Os08g40690.1		LOC_Os02g44300		LOC_Os02g10660.1	protein|glycosyl hydrolases family 17, putative, expressed		dihydroflavonol-4-reductase, putative, expressed	1
LOC_Os01g55240.1		LOC_Os05g15770.1 (298)	K01183	E3.2.1.14; chitinase [EC:3.2.1.14]	173				K09842	AAO3; abscisic-aldehyde oxidase [EC:1.2.3.14]	1		LOC_Os02g10660.1	LOC_Os05g15770.1		LOC_Os02g44880		LOC_Os02g11980.1	protein|receptor-like protein kinase precursor, putative, expressed		DNA binding protein, putative, expressed	1
LOC_Os01g55290.1		LOC_Os06g25010.1 (249)	K01183	E3.2.1.14; chitinase [EC:3.2.1.14]	126				K23094	ABC4, menA; 2-carboxy-1,4-naphthoquinone phytyltransferase [EC:2.5.1.130]	1		LOC_Os02g11980.1	LOC_Os06g25010.1		LOC_Os02g44990		LOC_Os02g12010.1	protein|receptor-like protein kinase precursor, putative, expressed		DNA-directed RNA polymerase subunit beta, putative, expressed	1
LOC_Os01g55290.2		LOC_Os06g46340.1 (887)	K01187	malZ; alpha-glucosidase [EC:3.2.1.20]	661				K05658	ABCB1, CD243; ATP-binding cassette, subfamily B (MDR/TAP), member 1 [EC:7.6.2.2]	1		LOC_Os02g12010.1	LOC_Os06g46340.1		LOC_Os02g46850		LOC_Os02g12030.1	protein|receptor-like protein kinase precursor, putative, expressed		DUF260 domain containing protein, putative, expressed	1
LOC_Os01g55290.3		LOC_Os03g20420.1 (676)	K01209	abfA; alpha-L-arabinofuranosidase [EC:3.2.1.55]	678				K01681	ACO, acnA; aconitate hydratase [EC:4.2.1.3]	1		LOC_Os02g12030.1	LOC_Os03g20420.1		LOC_Os02g46860		LOC_Os02g12040.1	protein|receptor-like protein kinase precursor, putative, expressed		DUF567 domain containing protein, putative, expressed	1
LOC_Os01g56450.1		LOC_Os03g20420.2 (518)	K01209	abfA; alpha-L-arabinofuranosidase [EC:3.2.1.55]	380				K21867	AKT, KAT, GORK, SKOR; potassium channel	1		LOC_Os02g12040.1	LOC_Os03g20420.2		LOC_Os02g47840		LOC_Os02g16060.1	protein|RGA-1, putative, expressed		DUF584 domain containing protein, putative, expressed	1
LOC_Os01g57073.1		LOC_Os03g20420.3 (518)	K01209	abfA; alpha-L-arabinofuranosidase [EC:3.2.1.55]	380				K01623	ALDO; fructose-bisphosphate aldolase, class I [EC:4.1.2.13]	1		LOC_Os02g16060.1	LOC_Os03g20420.3		LOC_Os02g51890		LOC_Os02g16270.1	protein|xa1, putative, expressed		enzyme of the cupin superfamily protein, putative, expressed	1
LOC_Os01g59000.1		LOC_Os12g24650.1 (543)	K01255	CARP, pepA; leucyl aminopeptidase [EC:3.4.11.1]	393				K03320	amt, AMT, MEP; ammonium transporter, Amt family	1		LOC_Os02g16270.1	LOC_Os12g24650.1		LOC_Os02g53750		LOC_Os02g16270.2	protein|xa1, putative, expressed		ERD1 protein, chloroplast precursor, putative, expressed	1
LOC_Os01g59060.1		LOC_Os07g32590.1 (358)	K01265	map; methionyl aminopeptidase [EC:3.4.11.18]	380				K08695	ANR; anthocyanidin reductase [EC:1.3.1.77]	1		LOC_Os02g16270.2	LOC_Os07g32590.1		LOC_Os02g54360		LOC_Os02g18070.1	protein|NB-ARC domain containing protein, expressed		esterase, putative, expressed	1
LOC_Os01g59840.1		LOC_Os08g42910.1 (454)	K01265	map; methionyl aminopeptidase [EC:3.4.11.18]	369				K01723	AOS; hydroperoxide dehydratase [EC:4.2.1.92]	1		LOC_Os02g18070.1	LOC_Os08g42910.1		LOC_Os02g54980		LOC_Os02g18080.1	protein|NB-ARC domain containing protein, expressed		exo70 exocyst complex subunit, putative, expressed	1
LOC_Os01g60020.1		LOC_Os04g52100.1 (341)	K01265	map; methionyl aminopeptidase [EC:3.4.11.18]	260				K03098	APOD; apolipoprotein D and lipocalin family protein	1		LOC_Os02g18080.1	LOC_Os04g52100.1		LOC_Os02g55610		LOC_Os02g32520.1	protein|ERD1 protein, chloroplast precursor, putative, expressed		expansin precursor, putative, expressed	1
LOC_Os01g60860.1		LOC_Os12g10590.1 (217)	K01358	clpP, CLPP; ATP-dependent Clp protease, protease subunit [EC:3.4.21.92]	216				K20855	B3GALT1S; beta-1,3-galactosyltransferase 1/2/3/4/5/7/8 [EC:2.4.1.-]	1		LOC_Os02g32520.1	LOC_Os12g10590.1		LOC_Os02g57560		LOC_Os02g32520.2	protein|ERD1 protein, chloroplast precursor, putative, expressed		flavonol sulfotransferase, putative, expressed	1
LOC_Os01g61080.1		LOC_Os10g21300.1 (217)	K01358	clpP, CLPP; ATP-dependent Clp protease, protease subunit [EC:3.4.21.92]	217				K03428	bchM, chlM; magnesium-protoporphyrin O-methyltransferase [EC:2.1.1.11]	1		LOC_Os02g32520.2	LOC_Os10g21300.1		LOC_Os02g58120		LOC_Os02g34790.1	protein|receptor-like protein kinase 5 precursor, putative, expressed		flavonol synthase/flavanone 3-hydroxylase, putative, expressed	1
LOC_Os01g61230.1		LOC_Os08g15270.1 (217)	K01358	clpP, CLPP; ATP-dependent Clp protease, protease subunit [EC:3.4.21.92]	219				K05350	bglB; beta-glucosidase [EC:3.2.1.21]	1		LOC_Os02g34790.1	LOC_Os08g15270.1		LOC_Os03g02550		LOC_Os02g35320.1	protein|expressed protein		glycosyl transferase 8 domain containing protein, putative, expressed	1
LOC_Os01g61510.1		LOC_Os06g39712.1 (217)	K01358	clpP, CLPP; ATP-dependent Clp protease, protease subunit [EC:3.4.21.92]	218				K15414	C1QBP; complement component 1 Q subcomponent-binding protein, mitochondrial	1		LOC_Os02g35320.1	LOC_Os06g39712.1		LOC_Os03g04020		LOC_Os02g36619.1	protein|exo70 exocyst complex subunit, putative, expressed		glycosyltransferase, putative, expressed	1
LOC_Os01g61990.1		LOC_Os01g57073.1 (974)	K01408	IDE, ide; insulysin [EC:3.4.24.56]	768				K00083	CAD; cinnamyl-alcohol dehydrogenase [EC:1.1.1.195]	1		LOC_Os02g36619.1	LOC_Os01g57073.1		LOC_Os03g04470		LOC_Os02g36940.1	protein|uncharacterized Cys-rich domain containing protein, putative, expressed		glyoxalase family protein, putative, expressed	1
LOC_Os01g61990.2		LOC_Os08g02700.1 (363)	K01623	ALDO; fructose-bisphosphate aldolase, class I [EC:4.1.2.13]	502				K01255	CARP, pepA; leucyl aminopeptidase [EC:3.4.11.1]	1		LOC_Os02g36940.1	LOC_Os08g02700.1		LOC_Os03g05900		LOC_Os02g38040.1	protein|leucine-rich repeat family protein, putative, expressed		heavy metal associated domain containing protein, expressed	1
LOC_Os01g63690.1		LOC_Os07g34520.1 (573)	K01637	E4.1.3.1, aceA; isocitrate lyase [EC:4.1.3.1]	727				K20617	CYP71A; cytochrome P450 family 71 subfamily A	1		LOC_Os02g38040.1	LOC_Os07g34520.1		LOC_Os03g09900		LOC_Os02g41840.1	protein|DUF584 domain containing protein, putative, expressed		heavy metal transport/detoxification protein, putative, expressed	1
LOC_Os01g63930.1		LOC_Os07g34520.2 (562)	K01637	E4.1.3.1, aceA; isocitrate lyase [EC:4.1.3.1]	702				K09754	CYP98A, C3'H; 5-O-(4-coumaroyl)-D-quinate 3'-monooxygenase [EC:1.14.14.96]	1		LOC_Os02g41840.1	LOC_Os07g34520.2		LOC_Os03g10620		LOC_Os02g42440.1	protein|GEM, putative, expressed		heavy-metal-associated domain-containing protein, putative, expressed	1
LOC_Os01g63930.2		LOC_Os07g34520.3 (550)	K01637	E4.1.3.1, aceA; isocitrate lyase [EC:4.1.3.1]	672				K16904	DCTPP1; dCTP diphosphatase [EC:3.6.1.12]	1		LOC_Os02g42440.1	LOC_Os07g34520.3		LOC_Os03g10950		LOC_Os02g44300.1	protein|MSP domain containing protein, expressed		helix-loop-helix DNA-binding protein, putative, expressed	1
LOC_Os01g64110.1		LOC_Os04g40990.1 (568)	K01638	aceB, glcB; malate synthase [EC:2.3.3.9]	485				K00627	DLAT, aceF, pdhC; pyruvate dehydrogenase E2 component (dihydrolipoamide acetyltransferase) [EC:2.3.1.12]	1		LOC_Os02g44300.1	LOC_Os04g40990.1		LOC_Os03g12470		LOC_Os02g44300.3	protein|MSP domain containing protein, expressed		homeobox domain containing protein, expressed	1
LOC_Os01g64120.1		LOC_Os04g40990.2 (429)	K01638	aceB, glcB; malate synthase [EC:2.3.3.9]	292				K18693	DPP1, DPPL, PLPP4_5; diacylglycerol diphosphate phosphatase / phosphatidate phosphatase [EC:3.1.3.81 3.1.3.4]	1		LOC_Os02g44300.3	LOC_Os04g40990.2		LOC_Os03g16350		LOC_Os02g44300.4	protein|MSP domain containing protein, expressed		hs1, putative, expressed	1
LOC_Os01g69870.1		LOC_Os12g04440.1 (636)	K01649	leuA, IMS; 2-isopropylmalate synthase [EC:2.3.3.13]	619				K05933	E1.14.17.4; aminocyclopropanecarboxylate oxidase [EC:1.14.17.4]	1		LOC_Os02g44880.1	LOC_Os12g04440.1		LOC_Os03g16390		LOC_Os02g44880.1	protein|expressed protein		hypoxia-responsive family protein, putative, expressed	1
LOC_Os01g69870.2		LOC_Os12g04440.2 (590)	K01649	leuA, IMS; 2-isopropylmalate synthase [EC:2.3.3.13]	569				K01177	E3.2.1.2; beta-amylase [EC:3.2.1.2]	1		LOC_Os02g44990.1	LOC_Os12g04440.2		LOC_Os03g16950		LOC_Os02g44990.1	protein|OsFBDUF13 - F-box and DUF domain containing protein, expressed		inhibitor I family protein, putative, expressed	1
LOC_Os01g70770.1		LOC_Os08g09200.1 (992)	K01681	ACO, acnA; aconitate hydratase [EC:4.2.1.3]	1008				K07766	E3.6.1.52; diphosphoinositol-polyphosphate diphosphatase [EC:3.6.1.52]	1		LOC_Os02g46850.1	LOC_Os08g09200.1		LOC_Os03g16960		LOC_Os02g46850.1	protein|oligopeptide transporter, putative, expressed		integral membrane protein DUF6 containing protein, expressed	1
LOC_Os01g71340.1		LOC_Os03g12500.1 (479)	K01723	AOS; hydroperoxide dehydratase [EC:4.2.1.92]	338				K01761	E4.4.1.11; methionine-gamma-lyase [EC:4.4.1.11]	1		LOC_Os02g46860.1	LOC_Os03g12500.1		LOC_Os03g17790		LOC_Os02g46860.1	protein|oligopeptide transporter 4, putative, expressed		kinesin motor domain containing protein, putative, expressed	1
LOC_Os01g71350.1		LOC_Os10g37340.1 (465)	K01761	E4.4.1.11; methionine-gamma-lyase [EC:4.4.1.11]	361				K04120	E5.5.1.13; ent-copalyl diphosphate synthase [EC:5.5.1.13]	1		LOC_Os02g47840.1	LOC_Os10g37340.1		LOC_Os03g19010		LOC_Os02g47840.1	protein|universal stress protein domain containing protein, putative, expressed		late embryogenesis abundant protein, group 3, putative, expressed	1
LOC_Os01g72170.1		LOC_Os04g38530.1 (381)	K01785	galM, GALM; aldose 1-epimerase [EC:5.1.3.3]	368				K11420	EHMT; [histone H3]-lysine9 N-trimethyltransferase EHMT [EC:2.1.1.355]	1		LOC_Os02g51890.1	LOC_Os04g38530.1		LOC_Os03g19700		LOC_Os02g51890.1	protein|RNA recognition motif containing protein, putative, expressed		light repressible receptor protein kinase, putative, expressed	1
LOC_Os01g73170.1		LOC_Os08g41990.1 (479)	K01845	hemL; glutamate-1-semialdehyde 2,1-aminomutase [EC:5.4.3.8]	554				K07195	EXOC7, EXO70; exocyst complex component 7	1		LOC_Os02g51890.2	LOC_Os08g41990.1		LOC_Os03g19990		LOC_Os02g51890.2	protein|RNA recognition motif containing protein, putative, expressed		lipase, putative, expressed	1
LOC_Os01g73200.1		LOC_Os01g03020.1 (947)	K01869	LARS, leuS; leucyl-tRNA synthetase [EC:6.1.1.4]	819				K17756	FAO3; long-chain-alcohol oxidase [EC:1.1.3.20]	1		LOC_Os02g53750.1	LOC_Os01g03020.1		LOC_Os03g20840		LOC_Os02g53750.1	protein|tyrosine protein kinase domain containing protein, putative, expressed		LRR receptor-like protein kinase, putative, expressed	1
LOC_Os01g73500.1		LOC_Os01g03020.2 (834)	K01869	LARS, leuS; leucyl-tRNA synthetase [EC:6.1.1.4]	551				K15891	FLDH; NAD+-dependent farnesol dehydrogenase [EC:1.1.1.354]	1		LOC_Os02g53750.2	LOC_Os01g03020.2		LOC_Os03g21230		LOC_Os02g53750.2	protein|tyrosine protein kinase domain containing protein, putative, expressed		membrane protein, putative, expressed	1
LOC_Os01g73500.2		LOC_Os12g04990.1 (708)	K01897	ACSL, fadD; long-chain acyl-CoA synthetase [EC:6.2.1.3]	669				K04125	GA2ox; gibberellin 2beta-dioxygenase [EC:1.14.11.13]	1		LOC_Os02g54360.1	LOC_Os12g04990.1		LOC_Os03g22790		LOC_Os02g54360.1	protein|enzyme of the cupin superfamily protein, putative, expressed		MSP domain containing protein, expressed	1
LOC_Os02g01510.1		LOC_Os12g04990.2 (704)	K01897	ACSL, fadD; long-chain acyl-CoA synthetase [EC:6.2.1.3]	628				K01785	galM, GALM; aldose 1-epimerase [EC:5.1.3.3]	1		LOC_Os02g54980.1	LOC_Os12g04990.2		LOC_Os03g24730		LOC_Os02g54980.1	protein|pheophorbide a oxygenase, chloroplast precursor, putative, expressed		MYB family transcription factor, putative, expressed	1
LOC_Os02g02400.1		LOC_Os12g04990.3 (684)	K01897	ACSL, fadD; long-chain acyl-CoA synthetase [EC:6.2.1.3]	598				K20867	GAUT12S; galacturonosyltransferase 12/13/14/15 [EC:2.4.1.-]	1		LOC_Os02g55610.1	LOC_Os12g04990.3		LOC_Os03g29410		LOC_Os02g55610.1	protein|serine-rich protein, putative, expressed		NAC domain-containing protein 67, putative, expressed	1
LOC_Os02g02400.2		LOC_Os12g04990.4 (527)	K01897	ACSL, fadD; long-chain acyl-CoA synthetase [EC:6.2.1.3]	372				K19761	GGACT; gamma-glutamylaminecyclotransferase [EC:2.3.2.-]	1		LOC_Os02g57560.1	LOC_Os12g04990.4		LOC_Os03g29540		LOC_Os02g57560.1	protein|tyrosine protein kinase domain containing protein, putative, expressed		NAD dependent epimerase/dehydratase family protein, putative, expressed	1
LOC_Os02g02400.3		LOC_Os12g04990.5 (373)	K01897	ACSL, fadD; long-chain acyl-CoA synthetase [EC:6.2.1.3]	170				K00006	GPD1; glycerol-3-phosphate dehydrogenase (NAD+) [EC:1.1.1.8]	1		LOC_Os02g58120.1	LOC_Os12g04990.5		LOC_Os03g31150		LOC_Os02g58120.1	protein|oxidoreductase/ transition metal ion binding protein, putative, expressed		neutral/alkaline invertase, putative, expressed	1
LOC_Os02g04230.1		LOC_Os02g08100.1 (555)	K01904	4CL; 4-coumarate--CoA ligase [EC:6.2.1.12]	595				K00103	GULO; L-gulonolactone oxidase [EC:1.1.3.8]	1		LOC_Os03g02550.1	LOC_Os02g08100.1		LOC_Os03g40194		LOC_Os03g02550.1	protein|OsFBX76 - F-box domain containing protein, expressed		nodulin, putative, expressed	1
LOC_Os02g04230.2		LOC_Os03g18130.1 (605)	K01953	asnB, ASNS; asparagine synthase (glutamine-hydrolysing) [EC:6.3.5.4]	507				K09338	HD-ZIP; homeobox-leucine zipper protein	1		LOC_Os03g04020.1	LOC_Os03g18130.1		LOC_Os03g45390		LOC_Os03g04020.1	protein|expansin precursor, putative, expressed		oligopeptide transporter 4, putative, expressed	1
LOC_Os02g04230.3		LOC_Os03g18130.2 (489)	K01953	asnB, ASNS; asparagine synthase (glutamine-hydrolysing) [EC:6.3.5.4]	343				K01845	hemL; glutamate-1-semialdehyde 2,1-aminomutase [EC:5.4.3.8]	1		LOC_Os03g04020.2	LOC_Os03g18130.2		LOC_Os03g45400		LOC_Os03g04020.2	protein|expansin precursor, putative, expressed		oligopeptide transporter, putative, expressed	1
LOC_Os02g05470.1		LOC_Os03g18130.3 (489)	K01953	asnB, ASNS; asparagine synthase (glutamine-hydrolysing) [EC:6.3.5.4]	343				K00844	HK; hexokinase [EC:2.7.1.1]	1		LOC_Os03g04470.1	LOC_Os03g18130.3		LOC_Os03g46070		LOC_Os03g04470.1	protein|expressed protein		Os1bglu3 - beta-glucosidase homologue, similar to G. max isohydroxyurate hydrolase, expressed	1
LOC_Os02g05470.2		LOC_Os03g18130.4 (588)	K01953	asnB, ASNS; asparagine synthase (glutamine-hydrolysing) [EC:6.3.5.4]	484				K10251	HSD17B12, KAR, IFA38; 17beta-estradiol 17-dehydrogenase / very-long-chain 3-oxoacyl-CoA reductase [EC:1.1.1.62 1.1.1.330]	1		LOC_Os03g05900.1	LOC_Os03g18130.4		LOC_Os03g46200		LOC_Os03g05900.1	protein|expressed protein		Os4bglu12 - beta-glucosidase, exo-beta-glucanase, expressed	1
LOC_Os02g08100.1		LOC_Os01g64120.1 (166)	K02639	petF; ferredoxin	101				K09419	HSFF; heat shock transcription factor, other eukaryote	1		LOC_Os03g05900.2	LOC_Os01g64120.1		LOC_Os03g55010		LOC_Os03g05900.2	protein|expressed protein		OsFBDUF13 - F-box and DUF domain containing protein, expressed	1
LOC_Os02g09490.1		LOC_Os01g54540.1 (234)	K02871	RP-L13, MRPL13, rplM; large subunit ribosomal protein L13	222				K21604	IAR3, ILL6; jasmonoyl-L-amino acid hydrolase [EC:3.5.1.127]	1		LOC_Os03g09900.1	LOC_Os01g54540.1		LOC_Os03g55164		LOC_Os03g09900.1	protein|membrane protein, putative, expressed		OsFBO4 - F-box and other domain containing protein, expressed	1
LOC_Os02g09810.1		LOC_Os01g54540.2 (229)	K02871	RP-L13, MRPL13, rplM; large subunit ribosomal protein L13	212				K01408	IDE, ide; insulysin [EC:3.4.24.56]	1		LOC_Os03g10620.1	LOC_Os01g54540.2		LOC_Os03g55720		LOC_Os03g10620.1	protein|hydrolase, alpha/beta fold family domain containing protein, expressed		OsFBX148 - F-box domain containing protein, expressed	1
LOC_Os02g09810.2		LOC_Os09g19954.1 (121)	K02878	RP-L16, MRPL16, rplP; large subunit ribosomal protein L16	129				K00915	IPMK, IPK2; inositol-polyphosphate multikinase [EC:2.7.1.140 2.7.1.151]	1		LOC_Os03g10620.2	LOC_Os09g19954.1		LOC_Os03g55980		LOC_Os03g10620.2	protein|hydrolase, alpha/beta fold family domain containing protein, expressed		OsFBX352 - F-box domain containing protein, expressed	1
LOC_Os02g09810.3		LOC_Os03g60100.1 (211)	K02879	RP-L17, MRPL17, rplQ; large subunit ribosomal protein L17	202				K13464	JAZ; jasmonate ZIM domain-containing protein	1		LOC_Os03g10620.3	LOC_Os03g60100.1		LOC_Os03g55990		LOC_Os03g10620.3	protein|hydrolase, alpha/beta fold family domain containing protein, expressed		OsFBX76 - F-box domain containing protein, expressed	1
LOC_Os02g10660.1		LOC_Os03g61260.1 (171)	K02881	RP-L18, MRPL18, rplR; large subunit ribosomal protein L18	130				K09955	uncharacterized protein	1		LOC_Os03g10950.1	LOC_Os03g61260.1		LOC_Os03g56250		LOC_Os03g10950.1	protein|protein phosphatase 2C, putative, expressed		OsRCI2-5 - Putative low temperature and salt responsive protein, expressed	1
LOC_Os02g11980.1		LOC_Os03g61260.3 (107)	K02881	RP-L18, MRPL18, rplR; large subunit ribosomal protein L18	11				K04123	KAO; ent-kaurenoic acid monooxygenase [EC:1.14.14.107]	1		LOC_Os03g12470.1	LOC_Os03g61260.3		LOC_Os03g58790		LOC_Os03g12470.1	protein|OsWAK25 - OsWAK receptor-like protein kinase, expressed		OsSAUR21 - Auxin-responsive SAUR gene family member, expressed	1
LOC_Os02g12010.1		LOC_Os03g61260.4 (102)	K02881	RP-L18, MRPL18, rplR; large subunit ribosomal protein L18	56				K24345	KIC; calcium-binding protein KIC and related proteins	1		LOC_Os03g16350.1	LOC_Os03g61260.4		LOC_Os03g58980		LOC_Os03g16350.1	protein|DNA binding protein, putative, expressed		OsSAUR39 - Auxin-responsive SAUR gene family member, expressed	1
LOC_Os02g12030.1		LOC_Os10g21314.1 (120)	K02887	RP-L20, MRPL20, rplT; large subunit ribosomal protein L20	110				K00016	LDH, ldh; L-lactate dehydrogenase [EC:1.1.1.27]	1		LOC_Os03g16390.1	LOC_Os10g21314.1		LOC_Os03g60080		LOC_Os03g16390.1	protein|avr9/Cf-9 rapidly elicited protein, putative, expressed		OsWAK25 - OsWAK receptor-like protein kinase, expressed	1
LOC_Os02g12040.1		LOC_Os08g15306.1 (120)	K02887	RP-L20, MRPL20, rplT; large subunit ribosomal protein L20	111				K08912	LHCB1; light-harvesting complex II chlorophyll a/b binding protein 1	1		LOC_Os03g16950.1	LOC_Os08g15306.1		LOC_Os03g61150		LOC_Os03g16950.1	protein|cysteine-rich repeat secretory protein 55 precursor, putative, expressed		OsWAK32 - OsWAK receptor-like protein kinase, expressed	1
LOC_Os02g16060.1		LOC_Os09g19952.1 (109)	K02890	RP-L22, MRPL22, rplV; large subunit ribosomal protein L22	25				K22522	LOG; cytokinin riboside 5'-monophosphate phosphoribohydrolase [EC:3.2.2.-]	1		LOC_Os03g16960.1	LOC_Os09g19952.1		LOC_Os03g62690		LOC_Os03g16960.1	protein|cysteine-rich repeat secretory protein 55 precursor, putative, expressed		OsWAK33 - OsWAK receptor-like protein OsWAK-RLP, expressed	1
LOC_Os02g16270.1		LOC_Os01g59060.1 (168)	K02914	RP-L34, MRPL34, rpmH; large subunit ribosomal protein L34	54				K15718	LOX1_5; linoleate 9S-lipoxygenase [EC:1.13.11.58]	1		LOC_Os03g17790.1	LOC_Os01g59060.1		LOC_Os03g63310		LOC_Os03g17790.1	protein|OsRCI2-5 - Putative low temperature and salt responsive protein, expressed		OsWAK34 - OsWAK receptor-like protein kinase, expressed	1
LOC_Os02g16270.2		LOC_Os03g03360.1 (280)	K02931	RP-L5, MRPL5, rplE; large subunit ribosomal protein L5	173				K00454	LOX2S; lipoxygenase [EC:1.13.11.12]	1		LOC_Os03g19010.1	LOC_Os03g03360.1		LOC_Os03g63900		LOC_Os03g19010.1	protein|peroxisomal biogenesis factor 11, putative, expressed		OsWAK40 - OsWAK receptor-like protein OsWAK-RLP, expressed	1
LOC_Os02g17360.1		LOC_Os01g47330.1 (186)	K02935	RP-L7, MRPL12, rplL; large subunit ribosomal protein L7/L12	119				K01187	malZ; alpha-glucosidase [EC:3.2.1.20]	1		LOC_Os03g19700.1	LOC_Os01g47330.1		LOC_Os04g16830		LOC_Os03g19700.1	protein|plant protein of unknown function domain containing protein, expressed		OsWAK46 - OsWAK receptor-like protein kinase, expressed	1
LOC_Os02g17360.2		LOC_Os02g57670.1 (188)	K02939	RP-L9, MRPL9, rplI; large subunit ribosomal protein L9	126				K20000	matK; maturase K	1		LOC_Os03g19990.1	LOC_Os02g57670.1		LOC_Os04g21790		LOC_Os03g19990.1	protein|WD40-like Beta Propeller Repeat family protein, expressed		OsWAK59 - OsWAK receptor-like cytoplasmic kinase OsWAK-RLCK, expressed	1
LOC_Os02g18070.1		LOC_Os10g21346.1 (240)	K02982	RP-S3, rpsC; small subunit ribosomal protein S3	223				K20536	MPK3; mitogen-activated protein kinase 3 [EC:2.7.11.24]	1		LOC_Os03g20840.1	LOC_Os10g21346.1		LOC_Os04g21820		LOC_Os03g20840.1	protein|disease resistance RPP13-like protein 1, putative, expressed		OsWAK60 - OsWAK receptor-like protein kinase, expressed	1
LOC_Os02g18080.1		LOC_Os04g16820.1 (1068)	K03043	rpoB; DNA-directed RNA polymerase subunit beta [EC:2.7.7.6]	1004				K15032	MTERFD; mTERF domain-containing protein, mitochondrial	1		LOC_Os03g21230.1	LOC_Os04g16820.1		LOC_Os04g22120		LOC_Os03g21230.1	protein|leucine-rich repeat family protein, putative, expressed		OsWAK82 - OsWAK receptor-like cytoplasmic kinase OsWAK-RLCK, expressed	1
LOC_Os02g32370.1		LOC_Os08g34150.1 (180)	K03098	APOD; apolipoprotein D and lipocalin family protein	149				K08967	mtnD, mtnZ, ADI1; 1,2-dihydroxy-3-keto-5-methylthiopentene dioxygenase [EC:1.13.11.53 1.13.11.54]	1		LOC_Os03g22790.1	LOC_Os08g34150.1		LOC_Os04g24220		LOC_Os03g22790.1	protein|beta-amylase, putative, expressed		OsWAK83 - OsWAK pseudogene, expressed	1
LOC_Os02g32520.1		LOC_Os05g43390.1 (484)	K03106	SRP54, ffh; signal recognition particle subunit SRP54 [EC:3.6.5.4]	450				K11294	NCL, NSR1; nucleolin	1		LOC_Os03g24730.1	LOC_Os05g43390.1		LOC_Os04g24290		LOC_Os03g24730.1	protein|expressed protein		oxidoreductase, 2OG-FeII oxygenase domain containing protein, putative, expressed	1
LOC_Os02g32520.2		LOC_Os08g39600.1 (281)	K03216	trmL, cspR; tRNA (cytidine/uridine-2'-O-)-methyltransferase [EC:2.1.1.207]	211				K05577	ndhF; NAD(P)H-quinone oxidoreductase subunit 5 [EC:7.1.1.2]	1		LOC_Os03g29410.1	LOC_Os08g39600.1		LOC_Os04g29770		LOC_Os03g29410.1	protein|tyrosine protein kinase domain containing protein, putative, expressed		oxidoreductase/ transition metal ion binding protein, putative, expressed	1
LOC_Os02g34790.1		LOC_Os01g61510.1 (498)	K03320	amt, AMT, MEP; ammonium transporter, Amt family	550				K13126	PABPC; polyadenylate-binding protein	1		LOC_Os03g29540.1	LOC_Os01g61510.1		LOC_Os04g29790		LOC_Os03g29540.1	protein|ATP-dependent protease, putative, expressed		pathogen-related protein, putative, expressed	1
LOC_Os02g35320.1		LOC_Os06g04150.1 (327)	K03428	bchM, chlM; magnesium-protoporphyrin O-methyltransferase [EC:2.1.1.11]	201				K02639	petF; ferredoxin	1		LOC_Os03g29540.2	LOC_Os06g04150.1		LOC_Os04g29810		LOC_Os03g29540.2	protein|ATP-dependent protease, putative, expressed		pentatricopeptide, putative, expressed	1
LOC_Os02g36140.2		LOC_Os04g32920.1 (802)	K03549	kup; KUP system potassium uptake protein	780				K08176	PHO84; MFS transporter, PHS family, inorganic phosphate transporter	1		LOC_Os03g29540.3	LOC_Os04g32920.1		LOC_Os04g30030		LOC_Os03g29540.3	protein|ATP-dependent protease, putative, expressed		peptide chain release factor 2, putative, expressed	1
LOC_Os02g36140.3		LOC_Os04g32920.2 (802)	K03549	kup; KUP system potassium uptake protein	780				K17506	PPM1L, PP2CE; protein phosphatase 1L [EC:3.1.3.16]	1		LOC_Os03g31150.1	LOC_Os04g32920.2		LOC_Os04g30060		LOC_Os03g31150.1	protein|expressed protein		peptide transporter PTR3-A, putative, expressed	1
LOC_Os02g36140.4		LOC_Os04g32920.3 (793)	K03549	kup; KUP system potassium uptake protein	785				K14496	PYL; abscisic acid receptor PYR/PYL family	1		LOC_Os03g31150.2	LOC_Os04g32920.3		LOC_Os04g30110		LOC_Os03g31150.2	protein|expressed protein		peroxisomal biogenesis factor 11, putative, expressed	1
LOC_Os02g36140.5		LOC_Os04g32920.4 (793)	K03549	kup; KUP system potassium uptake protein	785				K17338	REEP1_2_3_4; receptor expression-enhancing protein 1/2/3/4	1		LOC_Os03g31150.3	LOC_Os04g32920.4		LOC_Os04g30160		LOC_Os03g31150.3	protein|expressed protein		pheophorbide a oxygenase, chloroplast precursor, putative, expressed	1
LOC_Os02g36440.1		LOC_Os04g32920.5 (793)	K03549	kup; KUP system potassium uptake protein	785				K07399	resB, ccs1; cytochrome c biogenesis protein	1		LOC_Os03g40194.1	LOC_Os04g32920.5		LOC_Os04g30240		LOC_Os03g40194.1	protein|disease resistance RPP13-like protein 1, putative, expressed		plant neutral invertase domain containing protein, expressed	1
LOC_Os02g36450.1		LOC_Os02g40500.1 (134)	K03676	grxC, GLRX, GLRX2; glutaredoxin 3	64				K16280	RGLG; E3 ubiquitin-protein ligase RGLG [EC:2.3.2.27]	1		LOC_Os03g45390.1	LOC_Os02g40500.1		LOC_Os04g30250		LOC_Os03g45390.1	protein|glucan endo-1,3-beta-glucosidase precursor, putative, expressed		plastocyanin-like domain containing protein, putative, expressed	1
LOC_Os02g36450.2		LOC_Os12g35340.1 (105)	K03676	grxC, GLRX, GLRX2; glutaredoxin 3	63				K16281	RHA1; RING-H2 zinc finger protein RHA1	1		LOC_Os03g45400.1	LOC_Os12g35340.1		LOC_Os04g30330		LOC_Os03g45400.1	protein|antitermination NusB domain-containing protein, putative, expressed		pleiotropic drug resistance protein 3, putative, expressed	1
LOC_Os02g36619.1		LOC_Os02g02400.1 (493)	K03781	katE, CAT, catB, srpA; catalase [EC:1.11.1.6]	700				K16040	ROMT; trans-resveratrol di-O-methyltransferase [EC:2.1.1.240]	1		LOC_Os03g46070.1	LOC_Os02g02400.1		LOC_Os04g30340		LOC_Os03g46070.1	protein|thaumatin, putative, expressed		pleiotropic drug resistance protein, putative, expressed	1
LOC_Os02g36940.1		LOC_Os02g02400.2 (489)	K03781	katE, CAT, catB, srpA; catalase [EC:1.11.1.6]	633				K02878	RP-L16, MRPL16, rplP; large subunit ribosomal protein L16	1		LOC_Os03g46200.1	LOC_Os02g02400.2		LOC_Os04g32110		LOC_Os03g46200.1	protein|acetyltransferase, GNAT family, putative, expressed		pollen signalling protein with adenylyl cyclase activity, putative, expressed	1
LOC_Os02g38040.1		LOC_Os02g02400.3 (285)	K03781	katE, CAT, catB, srpA; catalase [EC:1.11.1.6]	162				K02879	RP-L17, MRPL17, rplQ; large subunit ribosomal protein L17	1		LOC_Os03g55010.1	LOC_Os02g02400.3		LOC_Os04g33240		LOC_Os03g55010.1	protein|UDP-glucoronosyl and UDP-glucosyl transferase domain containing protein, expressed		PPR repeat domain containing protein, putative, expressed	1
LOC_Os02g38840.1		LOC_Os06g09679.1 (253)	K04078	groES, HSPE1; chaperonin GroES	253				K02890	RP-L22, MRPL22, rplV; large subunit ribosomal protein L22	1		LOC_Os03g55164.1	LOC_Os06g09679.1		LOC_Os04g33610		LOC_Os03g55164.1	protein|WRKY4, expressed		protein kinase, putative, expressed	1
LOC_Os02g38840.2		LOC_Os06g09679.2 (253)	K04078	groES, HSPE1; chaperonin GroES	253				K02914	RP-L34, MRPL34, rpmH; large subunit ribosomal protein L34	1		LOC_Os03g55164.2	LOC_Os06g09679.2		LOC_Os04g34360		LOC_Os03g55164.2	protein|WRKY4, expressed		protein phosphatase 2C, putative, expressed	1
LOC_Os02g39850.1		LOC_Os06g09679.3 (193)	K04078	groES, HSPE1; chaperonin GroES	85				K02931	RP-L5, MRPL5, rplE; large subunit ribosomal protein L5	1		LOC_Os03g55720.1	LOC_Os06g09679.3		LOC_Os04g35130		LOC_Os03g55720.1	protein|cytochrome b6f complex subunit, putative, expressed		pumilio-family RNA binding repeat containing protein, expressed	1
LOC_Os02g40500.1		LOC_Os09g15050.1 (305)	K04120	E5.5.1.13; ent-copalyl diphosphate synthase [EC:5.5.1.13]	15				K02935	RP-L7, MRPL12, rplL; large subunit ribosomal protein L7/L12	1		LOC_Os03g55720.2	LOC_Os09g15050.1		LOC_Os04g35540		LOC_Os03g55720.2	protein|cytochrome b6f complex subunit, putative, expressed		purine permease, putative, expressed	1
LOC_Os02g40784.1		LOC_Os02g36140.2 (830)	K04121	E4.2.3.19; ent-kaurene synthase [EC:4.2.3.19]	97	K14036	15		K02939	RP-L9, MRPL9, rplI; large subunit ribosomal protein L9	1		LOC_Os03g55980.1	LOC_Os02g36140.2		LOC_Os04g37740		LOC_Os03g55980.1	protein|expressed protein		purple acid phosphatase precursor, putative, expressed	1
LOC_Os02g40784.3		LOC_Os02g36140.3 (598)	K04121	E4.2.3.19; ent-kaurene synthase [EC:4.2.3.19]	53	K14036	8		K03043	rpoB; DNA-directed RNA polymerase subunit beta [EC:2.7.7.6]	1		LOC_Os03g55990.1	LOC_Os02g36140.3		LOC_Os04g37790		LOC_Os03g55990.1	protein|homeobox domain containing protein, expressed		receptor kinase-like protein, identical, putative, expressed	1
LOC_Os02g40840.1		LOC_Os02g36140.4 (494)	K04121	E4.2.3.19; ent-kaurene synthase [EC:4.2.3.19]	30				K13459	RPS2; disease resistance protein RPS2	1		LOC_Os03g55990.2	LOC_Os02g36140.4		LOC_Os04g39300		LOC_Os03g55990.2	protein|homeobox domain containing protein, expressed		receptor protein kinase CLAVATA1 precursor, putative, expressed	1
LOC_Os02g41630.2		LOC_Os02g36140.5 (477)	K04121	E4.2.3.19; ent-kaurene synthase [EC:4.2.3.19]	25				K02982	RP-S3, rpsC; small subunit ribosomal protein S3	1		LOC_Os03g55990.3	LOC_Os02g36140.5		LOC_Os04g39320		LOC_Os03g55990.3	protein|homeobox domain containing protein, expressed		receptor-like protein kinase 2 precursor, putative, expressed	1
LOC_Os02g41840.1		LOC_Os06g02019.1 (507)	K04123	KAO; ent-kaurenoic acid monooxygenase [EC:1.14.14.107]	384				K14488	SAUR; SAUR family protein (auxin response genes)	1		LOC_Os03g56250.1	LOC_Os06g02019.1		LOC_Os04g39350		LOC_Os03g56250.1	protein|LRR receptor-like protein kinase, putative, expressed		receptor-like protein kinase 5 precursor, putative, expressed	1
LOC_Os02g42440.1		LOC_Os01g55240.1 (328)	K04125	GA2ox; gibberellin 2beta-dioxygenase [EC:1.14.11.13]	348				K00831	serC, PSAT1; phosphoserine aminotransferase [EC:2.6.1.52]	1		LOC_Os03g58790.1	LOC_Os01g55240.1		LOC_Os04g39880		LOC_Os03g58790.1	protein|ATPase, putative, expressed		resistance-related receptor-like kinase, putative, expressed	1
LOC_Os02g43330.1		LOC_Os05g34854.1 (446)	K05282	GA20ox; gibberellin-44 dioxygenase [EC:1.14.11.12]	237				K22013	SGR, SGRL; magnesium dechelatase [EC:4.99.1.10]	1		LOC_Os03g58980.1	LOC_Os05g34854.1		LOC_Os04g40630		LOC_Os03g58980.1	protein|Cupin domain containing protein, expressed		retinol dehydrogenase, putative, expressed	1
LOC_Os02g44300.1		LOC_Os05g34854.2 (404)	K05282	GA20ox; gibberellin-44 dioxygenase [EC:1.14.11.12]	147				K15015	SLC32A, VGAT; solute carrier family 32 (vesicular inhibitory amino acid transporter)	1		LOC_Os03g60080.1	LOC_Os05g34854.2		LOC_Os04g41229		LOC_Os03g60080.1	protein|NAC domain-containing protein 67, putative, expressed		RGA-1, putative, expressed	1
LOC_Os02g44300.3		LOC_Os04g43410.1 (506)	K05350	bglB; beta-glucosidase [EC:3.2.1.21]	394				K00654	SPT; serine palmitoyltransferase [EC:2.3.1.50]	1		LOC_Os03g61150.2	LOC_Os04g43410.1		LOC_Os04g44354		LOC_Os03g61150.1	protein|expressed protein		rhodanese-like domain containing protein, putative, expressed	1
LOC_Os02g44880.1		LOC_Os10g21418.1 (735)	K05577	ndhF; NAD(P)H-quinone oxidoreductase subunit 5 [EC:7.1.1.2]	772				K03106	SRP54, ffh; signal recognition particle subunit SRP54 [EC:3.6.5.4]	1		LOC_Os03g61150.3	LOC_Os10g21418.1		LOC_Os04g44500		LOC_Os03g62690.1	protein|pentatricopeptide, putative, expressed		RNA recognition motif containing protein, putative, expressed	1
LOC_Os02g44980.1		LOC_Os01g18670.1 (1286)	K05658	ABCB1, CD243; ATP-binding cassette, subfamily B (MDR/TAP), member 1 [EC:7.6.2.2]	1122				K16055	TPS; trehalose 6-phosphate synthase/phosphatase [EC:2.4.1.15 3.1.3.12]	1		LOC_Os03g62690.1	LOC_Os01g18670.1		LOC_Os04g48270		LOC_Os03g62690.2	protein|pentatricopeptide, putative, expressed		rubredoxin family protein, putative, expressed	1
LOC_Os02g44990.1		LOC_Os05g05680.1 (309)	K05933	E1.14.17.4; aminocyclopropanecarboxylate oxidase [EC:1.14.17.4]	264				K03216	trmL, cspR; tRNA (cytidine/uridine-2'-O-)-methyltransferase [EC:2.1.1.207]	1		LOC_Os03g62690.2	LOC_Os05g05680.1		LOC_Os04g49370		LOC_Os03g63310.1	protein|cytochrome P450 71E1, putative, expressed		SAM dependent carboxyl methyltransferase, putative, expressed	1
LOC_Os02g46850.1		LOC_Os08g38710.1 (754)	K06617	E2.4.1.82; raffinose synthase [EC:2.4.1.82]	878				K14963	WDR5, SWD3, CPS30; COMPASS component SWD3	1		LOC_Os03g63310.1	LOC_Os08g38710.1		LOC_Os04g49748		LOC_Os03g63900.1	protein|1-aminocyclopropane-1-carboxylate oxidase 2, putative, expressed		SCP-like extracellular protein, expressed	1
LOC_Os02g46860.1		LOC_Os06g07600.1 (842)	K06617	E2.4.1.82; raffinose synthase [EC:2.4.1.82]	879								LOC_Os03g63900.1	LOC_Os06g07600.1		LOC_Os04g51030		LOC_Os04g16830.1	protein|DNA-directed RNA polymerase subunit beta, putative, expressed		secretory protein, putative, expressed	1
LOC_Os02g47840.1		LOC_Os05g48340.1 (527)	K06692	PSMD5; 26S proteasome non-ATPase regulatory subunit 5	359								LOC_Os04g16830.1	LOC_Os05g48340.1		LOC_Os04g52640		LOC_Os04g21790.1	protein|OsWAK34 - OsWAK receptor-like protein kinase, expressed		Ser/Thr protein kinase, putative, expressed	1
LOC_Os02g49720.1		LOC_Os05g48340.2 (501)	K06692	PSMD5; 26S proteasome non-ATPase regulatory subunit 5	323								LOC_Os04g21790.1	LOC_Os05g48340.2		LOC_Os04g52670		LOC_Os04g21820.1	protein|OsWAK33 - OsWAK receptor-like protein OsWAK-RLP, expressed		serine/threonine-protein kinase At1g18390 precursor, putative, expressed	1
LOC_Os02g49720.2		LOC_Os05g48340.3 (483)	K06692	PSMD5; 26S proteasome non-ATPase regulatory subunit 5	230								LOC_Os04g21820.1	LOC_Os05g48340.3		LOC_Os04g52810		LOC_Os04g22120.1	protein|protein kinase, putative, expressed		serine-rich protein, putative, expressed	1
LOC_Os02g49720.3		LOC_Os03g49440.1 (277)	K07025	K07025; putative hydrolase of the HAD superfamily	184								LOC_Os04g22120.1	LOC_Os03g49440.1		LOC_Os04g53120		LOC_Os04g24220.1	protein|OsWAK32 - OsWAK receptor-like protein kinase, expressed		S-locus-like receptor protein kinase, putative, expressed	1
LOC_Os02g49720.6		LOC_Os03g49440.2 (155)	K07025	K07025; putative hydrolase of the HAD superfamily	33	K18551	2						LOC_Os04g24220.1	LOC_Os03g49440.2		LOC_Os04g54080		LOC_Os04g24220.2	protein|OsWAK32 - OsWAK receptor-like protein kinase, expressed		spotted leaf 11, putative, expressed	1
LOC_Os02g49720.7		LOC_Os09g17810.1 (599)	K07195	EXOC7, EXO70; exocyst complex component 7	36								LOC_Os04g24220.2	LOC_Os09g17810.1		LOC_Os04g54310		LOC_Os04g24220.3	protein|OsWAK32 - OsWAK receptor-like protein kinase, expressed		stem-specific protein TSJT1, putative, expressed	1
LOC_Os02g51890.1		LOC_Os03g55970.1 (565)	K07399	resB, ccs1; cytochrome c biogenesis protein	605								LOC_Os04g24220.3	LOC_Os03g55970.1		LOC_Os04g58280		LOC_Os04g24290.1	protein|wall-associated receptor kinase 3 precursor, putative, expressed		SWIB/MDM2 domain containing protein, expressed	1
LOC_Os02g51890.2		LOC_Os04g32740.1 (223)	K07766	E3.6.1.52; diphosphoinositol-polyphosphate diphosphatase [EC:3.6.1.52]	85								LOC_Os04g24290.1	LOC_Os04g32740.1		LOC_Os05g04584		LOC_Os04g29770.1	protein|wall-associated receptor kinase-like 3 precursor, putative, expressed		terpene synthase, putative, expressed	1
LOC_Os02g52210.1		LOC_Os03g05620.1 (528)	K08176	PHO84; MFS transporter, PHS family, inorganic phosphate transporter	477								LOC_Os04g29770.1	LOC_Os03g05620.1		LOC_Os05g07940		LOC_Os04g29790.1	protein|OsWAK40 - OsWAK receptor-like protein OsWAK-RLP, expressed		tetraspanin family protein, putative, expressed	1
LOC_Os02g52210.2		LOC_Os06g22919.1 (312)	K08235	E2.4.1.207; xyloglucan:xyloglucosyl transferase [EC:2.4.1.207]	178								LOC_Os04g29790.1	LOC_Os06g22919.1		LOC_Os05g08420		LOC_Os04g29810.1	protein|expressed protein		tetratricopeptide-like helical, putative, expressed	1
LOC_Os02g53750.1		LOC_Os06g22919.2 (312)	K08235	E2.4.1.207; xyloglucan:xyloglucosyl transferase [EC:2.4.1.207]	178								LOC_Os04g29810.1	LOC_Os06g22919.2		LOC_Os05g08620		LOC_Os04g30030.1	protein|cysteine-rich receptor-like protein kinase 12 precursor, putative, expressed		thaumatin family domain containing protein, expressed	1
LOC_Os02g53750.2		LOC_Os06g22919.3 (312)	K08235	E2.4.1.207; xyloglucan:xyloglucosyl transferase [EC:2.4.1.207]	178								LOC_Os04g30030.1	LOC_Os06g22919.3		LOC_Os05g08750		LOC_Os04g30060.1	protein|wall-associated receptor kinase-like 10 precursor, putative, expressed		thioredoxin, putative, expressed	1
LOC_Os02g54254.1		LOC_Os06g22919.4 (312)	K08235	E2.4.1.207; xyloglucan:xyloglucosyl transferase [EC:2.4.1.207]	178								LOC_Os04g30060.1	LOC_Os06g22919.4		LOC_Os05g09020		LOC_Os04g30110.1	protein|wall-associated receptor kinase 3 precursor, putative, expressed		TKL_IRAK_DUF26-lc.12 - DUF26 kinases have homology to DUF26 containing loci, expressed	1
LOC_Os02g54254.2		LOC_Os04g45090.1 (192)	K08360	CYB561; cytochrome b-561 [EC:7.2.1.3]	124								LOC_Os04g30110.1	LOC_Os04g45090.1		LOC_Os05g17604		LOC_Os04g30160.1	protein|OsWAK46 - OsWAK receptor-like protein kinase, expressed		TKL_IRAK_DUF26-lc.13 - DUF26 kinases have homology to DUF26 containing loci, expressed	1
LOC_Os02g54254.3		LOC_Os04g45090.2 (237)	K08360	CYB561; cytochrome b-561 [EC:7.2.1.3]	208								LOC_Os04g30160.1	LOC_Os04g45090.2		LOC_Os05g19910		LOC_Os04g30240.1	protein|OsWAK60 - OsWAK receptor-like protein kinase, expressed		TKL_IRAK_DUF26-lc.14 - DUF26 kinases have homology to DUF26 containing loci, expressed	1
LOC_Os02g54254.4		LOC_Os06g07200.1 (306)	K08486	STX1B_2_3; syntaxin 1B/2/3	238								LOC_Os04g30240.1	LOC_Os06g07200.1		LOC_Os05g25390		LOC_Os04g30250.1	protein|wall-associated receptor kinase-like 5 precursor, putative, expressed		TKL_IRAK_DUF26-lc.15 - DUF26 kinases have homology to DUF26 containing loci, expressed	1
LOC_Os02g54360.1		LOC_Os03g57310.1 (331)	K08486	STX1B_2_3; syntaxin 1B/2/3	208								LOC_Os04g30250.1	LOC_Os03g57310.1		LOC_Os05g25770		LOC_Os04g30250.2	protein|wall-associated receptor kinase-like 5 precursor, putative, expressed		TKL_IRAK_DUF26-lc.17 - DUF26 kinases have homology to DUF26 containing loci, expressed	1
LOC_Os02g54980.1		LOC_Os04g53850.1 (345)	K08695	ANR; anthocyanidin reductase [EC:1.3.1.77]	211	K21102	17						LOC_Os04g30250.2	LOC_Os04g53850.1		LOC_Os05g26040		LOC_Os04g30250.3	protein|wall-associated receptor kinase-like 5 precursor, putative, expressed		TKL_IRAK_DUF26-lc.18 - DUF26 kinases have homology to DUF26 containing loci, expressed	1
LOC_Os02g55610.1		LOC_Os01g52240.1 (266)	K08912	LHCB1; light-harvesting complex II chlorophyll a/b binding protein 1	343								LOC_Os04g30250.3	LOC_Os01g52240.1		LOC_Os05g27660		LOC_Os04g30330.1	protein|OsWAK59 - OsWAK receptor-like cytoplasmic kinase OsWAK-RLCK, expressed		TKL_IRAK_DUF26-lc.19 - DUF26 kinases have homology to DUF26 containing loci, expressed	1
LOC_Os02g56300.1		LOC_Os10g28350.1 (200)	K08967	mtnD, mtnZ, ADI1; 1,2-dihydroxy-3-keto-5-methylthiopentene dioxygenase [EC:1.13.11.53 1.13.11.54]	167								LOC_Os04g30330.1	LOC_Os10g28350.1		LOC_Os05g27780		LOC_Os04g30340.1	protein|wall-associated receptor kinase, putative, expressed		TKL_IRAK_DUF26-ld.3 - DUF26 kinases have homology to DUF26 containing loci, expressed	1
LOC_Os02g57560.1		LOC_Os03g08470.1 (335)	K09286	EREBP; EREBP-like factor	181								LOC_Os04g30340.1	LOC_Os03g08470.1		LOC_Os05g28740		LOC_Os04g32110.1	protein|ACT domain containing protein, expressed		TKL_IRAK_DUF26-ld.6 - DUF26 kinases have homology to DUF26 containing loci, expressed	1
LOC_Os02g57670.1		LOC_Os03g08470.2 (335)	K09286	EREBP; EREBP-like factor	181								LOC_Os04g32110.1	LOC_Os03g08470.2		LOC_Os05g30010		LOC_Os04g33240.1	protein|sex determination protein tasselseed-2, putative, expressed		transporter family protein, putative, expressed	1
LOC_Os02g58120.1		LOC_Os03g08470.3 (335)	K09286	EREBP; EREBP-like factor	181								LOC_Os04g33240.1	LOC_Os03g08470.3		LOC_Os05g31160		LOC_Os04g33610.1	protein|expressed protein		verticillium wilt disease resistance protein, putative, expressed	1
LOC_Os03g02550.1		LOC_Os03g08490.1 (322)	K09286	EREBP; EREBP-like factor	28								LOC_Os04g33610.1	LOC_Os03g08490.1		LOC_Os05g37520		LOC_Os04g34360.1	protein|serine/threonine-protein kinase receptor precursor, putative, expressed		wall-associated kinase 1, putative, expressed	1
LOC_Os03g03034.1		LOC_Os03g08500.1 (330)	K09286	EREBP; EREBP-like factor	140								LOC_Os04g34360.1	LOC_Os03g08500.1		LOC_Os05g39260		LOC_Os04g35130.1	protein|expressed protein		wall-associated kinase-like 2, putative, expressed	1
LOC_Os03g03034.2		LOC_Os03g08500.2 (333)	K09286	EREBP; EREBP-like factor	52								LOC_Os04g35130.1	LOC_Os03g08500.2		LOC_Os05g45020		LOC_Os04g35540.1	protein|amino acid permease family protein, putative, expressed		wall-associated receptor kinase, putative, expressed	1
LOC_Os03g03034.3		LOC_Os10g41330.1 (274)	K09286	EREBP; EREBP-like factor	74								LOC_Os04g35540.1	LOC_Os10g41330.1		LOC_Os05g46020		LOC_Os04g37740.1	protein|zinc finger, C3HC4 type domain containing protein, expressed		wall-associated receptor kinase-like 10 precursor, putative, expressed	1
LOC_Os03g03034.4		LOC_Os10g41330.2 (247)	K09286	EREBP; EREBP-like factor	115								LOC_Os04g37740.1	LOC_Os10g41330.2		LOC_Os05g46460		LOC_Os04g37790.1	protein|expressed protein		wall-associated receptor kinase-like 3 precursor, putative, expressed	1
LOC_Os03g03034.5		LOC_Os07g42510.1 (343)	K09286	EREBP; EREBP-like factor	155								LOC_Os04g37790.1	LOC_Os07g42510.1		LOC_Os05g47750		LOC_Os04g37790.2	protein|expressed protein		wall-associated receptor kinase-like 5 precursor, putative, expressed	1
LOC_Os03g03360.1		LOC_Os09g11460.1 (233)	K09286	EREBP; EREBP-like factor	17								LOC_Os04g37790.2	LOC_Os09g11460.1		LOC_Os05g50090		LOC_Os04g39300.1	protein|heavy metal transport/detoxification protein, putative, expressed		WD domain, G-beta repeat domain containing protein, expressed	1
LOC_Os03g04020.1		LOC_Os09g11460.2 (233)	K09286	EREBP; EREBP-like factor	17								LOC_Os04g39300.1	LOC_Os09g11460.2		LOC_Os05g50190		LOC_Os04g39320.1	protein|expressed protein		WD40-like Beta Propeller Repeat family protein, expressed	1
LOC_Os03g04020.2		LOC_Os09g11480.1 (251)	K09286	EREBP; EREBP-like factor	27								LOC_Os04g39320.2	LOC_Os09g11480.1		LOC_Os06g02540		LOC_Os04g39350.1	protein|heavy metal associated domain containing protein, expressed		WIP3 - Wound-induced protein precursor, expressed	1
LOC_Os03g04060.1		LOC_Os09g11480.2 (256)	K09286	EREBP; EREBP-like factor	27								LOC_Os04g39320.4	LOC_Os09g11480.2		LOC_Os06g03830		LOC_Os04g39880.1	protein|Os4bglu12 - beta-glucosidase, exo-beta-glucanase, expressed		WRKY10, expressed	1
LOC_Os03g04470.1		LOC_Os06g07030.1 (185)	K09286	EREBP; EREBP-like factor	112								LOC_Os04g39350.1	LOC_Os06g07030.1		LOC_Os06g09260		LOC_Os04g39880.2	protein|Os4bglu12 - beta-glucosidase, exo-beta-glucanase, expressed		WRKY4, expressed	1
LOC_Os03g05620.1		LOC_Os01g04750.1 (318)	K09287	RAV; RAV-like factor	143								LOC_Os04g39880.1	LOC_Os01g04750.1		LOC_Os06g13560		LOC_Os04g39880.3	protein|Os4bglu12 - beta-glucosidase, exo-beta-glucanase, expressed		WRKY45, expressed	1
LOC_Os03g05900.1		LOC_Os01g04800.1 (366)	K09287	RAV; RAV-like factor	174								LOC_Os04g39880.2	LOC_Os01g04800.1		LOC_Os06g15330		LOC_Os04g40630.1	protein|BTBZ4 - Bric-a-Brac, Tramtrack, Broad Complex BTB domain with TAZ zinc finger and Calmodulin-binding domains, expressed		WRKY67, expressed	1
LOC_Os03g05900.2		LOC_Os02g43330.1 (262)	K09338	HD-ZIP; homeobox-leucine zipper protein	26								LOC_Os04g39880.3	LOC_Os02g43330.1		LOC_Os06g19070		LOC_Os04g40630.2	protein|BTBZ4 - Bric-a-Brac, Tramtrack, Broad Complex BTB domain with TAZ zinc finger and Calmodulin-binding domains, expressed		WRKY7, expressed	1
LOC_Os03g06200.1		LOC_Os09g28354.1 (303)	K09419	HSFF; heat shock transcription factor, other eukaryote	161								LOC_Os04g40630.1	LOC_Os09g28354.1		LOC_Os06g19370		LOC_Os04g40630.3	protein|BTBZ4 - Bric-a-Brac, Tramtrack, Broad Complex BTB domain with TAZ zinc finger and Calmodulin-binding domains, expressed		WRKY72, expressed	1
LOC_Os03g07570.1		LOC_Os03g20090.1 (330)	K09422	MYBP; transcription factor MYB, plant	115								LOC_Os04g40630.2	LOC_Os03g20090.1		LOC_Os06g20200		LOC_Os04g40630.4	protein|BTBZ4 - Bric-a-Brac, Tramtrack, Broad Complex BTB domain with TAZ zinc finger and Calmodulin-binding domains, expressed		WRKY9, expressed	1
LOC_Os03g07570.3		LOC_Os11g45740.1 (286)	K09422	MYBP; transcription factor MYB, plant	126								LOC_Os04g40630.3	LOC_Os11g45740.1		LOC_Os06g24990		LOC_Os04g41229.1	protein|helix-loop-helix DNA-binding domain containing protein, expressed		xa1, putative, expressed	1
LOC_Os03g07570.4		LOC_Os08g43550.1 (244)	K09422	MYBP; transcription factor MYB, plant	170								LOC_Os04g40630.4	LOC_Os08g43550.1		LOC_Os06g38830		LOC_Os04g41229.2	protein|helix-loop-helix DNA-binding domain containing protein, expressed		xylanase inhibitor protein 1 precursor, putative, expressed	1
LOC_Os03g08470.1		LOC_Os04g36800.1 (463)	K09458	fabF, OXSM, CEM1; 3-oxoacyl-[acyl-carrier-protein] synthase II [EC:2.3.1.179]	445								LOC_Os04g41229.1	LOC_Os04g36800.1		LOC_Os06g44170		LOC_Os04g44354.1	protein|UDP-glucoronosyl and UDP-glucosyl transferase domain containing protein, expressed		xylem cysteine proteinase 2 precursor, putative, expressed	1
LOC_Os03g08470.2		LOC_Os04g36800.2 (457)	K09458	fabF, OXSM, CEM1; 3-oxoacyl-[acyl-carrier-protein] synthase II [EC:2.3.1.179]	405								LOC_Os04g41229.2	LOC_Os04g36800.2		LOC_Os06g45140		LOC_Os04g44354.2	protein|UDP-glucoronosyl and UDP-glucosyl transferase domain containing protein, expressed		zinc finger/CCCH transcription factor, putative, expressed	1
LOC_Os03g08470.3		LOC_Os10g12080.1 (241)	K09754	CYP98A, C3'H; 5-O-(4-coumaroyl)-D-quinate 3'-monooxygenase [EC:1.14.14.96]	84								LOC_Os04g44354.1	LOC_Os10g12080.1		LOC_Os06g48250		LOC_Os04g44354.3	protein|UDP-glucoronosyl and UDP-glucosyl transferase domain containing protein, expressed
LOC_Os03g08490.1		LOC_Os03g57680.1 (1357)	K09842	AAO3; abscisic-aldehyde oxidase [EC:1.2.3.14]	734								LOC_Os04g44354.2	LOC_Os03g57680.1		LOC_Os06g49390		LOC_Os04g44354.4	protein|UDP-glucoronosyl and UDP-glucosyl transferase domain containing protein, expressed
LOC_Os03g08500.1		LOC_Os06g41020.1 (917)	K09955	K09955; uncharacterized protein	684								LOC_Os04g44354.3	LOC_Os06g41020.1		LOC_Os07g03740		LOC_Os04g44500.1	protein|GEM, putative, expressed
LOC_Os03g08500.2		LOC_Os10g31850.1 (267)	K10144	RCHY1, PIRH2; RING finger and CHY zinc finger domain-containing protein 1 [EC:2.3.2.27]	224								LOC_Os04g44354.4	LOC_Os10g31850.1		LOC_Os07g04040		LOC_Os04g48270.1	protein|OsFBX148 - F-box domain containing protein, expressed
LOC_Os03g08624.1		LOC_Os10g31850.2 (242)	K10144	RCHY1, PIRH2; RING finger and CHY zinc finger domain-containing protein 1 [EC:2.3.2.27]	156								LOC_Os04g44500.1	LOC_Os10g31850.2		LOC_Os07g06800		LOC_Os04g48270.2	protein|OsFBX148 - F-box domain containing protein, expressed
LOC_Os03g08999.1		LOC_Os10g31850.5 (133)	K10144	RCHY1, PIRH2; RING finger and CHY zinc finger domain-containing protein 1 [EC:2.3.2.27]	40								LOC_Os04g48270.1	LOC_Os10g31850.5		LOC_Os07g06850		LOC_Os04g48270.3	protein|OsFBX148 - F-box domain containing protein, expressed
LOC_Os03g09020.1		LOC_Os06g19590.1 (366)	K10251	HSD17B12, KAR, IFA38; 17beta-estradiol 17-dehydrogenase / very-long-chain 3-oxoacyl-CoA reductase [EC:1.1.1.62 1.1.1.330]	110								LOC_Os04g48270.2	LOC_Os06g19590.1		LOC_Os07g08150		LOC_Os04g48270.4	protein|OsFBX148 - F-box domain containing protein, expressed
LOC_Os03g09060.1		LOC_Os02g52210.1 (439)	K10664	ATL6S; E3 ubiquitin-protein ligase ATL6/9/15/31/42/55 [EC:2.3.2.27]	124								LOC_Os04g48270.3	LOC_Os02g52210.1		LOC_Os07g09010		LOC_Os04g49370.1	protein|expressed protein
LOC_Os03g09900.1		LOC_Os02g52210.2 (438)	K10664	ATL6S; E3 ubiquitin-protein ligase ATL6/9/15/31/42/55 [EC:2.3.2.27]	123								LOC_Os04g48270.4	LOC_Os02g52210.2		LOC_Os07g09420		LOC_Os04g49748.1	protein|purine permease, putative, expressed
LOC_Os03g10620.1		LOC_Os02g41630.2 (702)	K10775	PAL; phenylalanine ammonia-lyase [EC:4.3.1.24]	720	K13064	145						LOC_Os04g49370.1	LOC_Os02g41630.2		LOC_Os07g14150		LOC_Os04g51030.1	protein|wall-associated kinase 1, putative, expressed
LOC_Os03g10620.2		LOC_Os05g35290.1 (717)	K10775	PAL; phenylalanine ammonia-lyase [EC:4.3.1.24]	840								LOC_Os04g49748.1	LOC_Os05g35290.1		LOC_Os07g33580		LOC_Os04g52640.1	protein|SHR5-receptor-like kinase, putative, expressed
LOC_Os03g10620.3		LOC_Os07g43810.1 (265)	K11294	NCL, NSR1; nucleolin	146								LOC_Os04g51030.1	LOC_Os07g43810.1		LOC_Os07g33610		LOC_Os04g52640.2	protein|SHR5-receptor-like kinase, putative, expressed
LOC_Os03g10950.1		LOC_Os09g19830.1 (1202)	K11420	EHMT; [histone H3]-lysine9 N-trimethyltransferase EHMT [EC:2.1.1.355]	322								LOC_Os04g52640.1	LOC_Os09g19830.1		LOC_Os07g34850		LOC_Os04g52640.3	protein|SHR5-receptor-like kinase, putative, expressed
LOC_Os03g12470.1		LOC_Os01g38530.1 (743)	K12125	ELF3; protein EARLY FLOWERING 3	374								LOC_Os04g52640.2	LOC_Os01g38530.1		LOC_Os07g35310		LOC_Os04g52670.1	protein|OsSAUR21 - Auxin-responsive SAUR gene family member, expressed
LOC_Os03g12500.1		LOC_Os01g38530.2 (397)	K12125	ELF3; protein EARLY FLOWERING 3	61								LOC_Os04g52640.3	LOC_Os01g38530.2		LOC_Os07g35330		LOC_Os04g52810.1	protein|no apical meristem protein, putative, expressed
LOC_Os03g12890.1		LOC_Os02g39850.1 (443)	K13065	E2.3.1.133, HCT; shikimate O-hydroxycinnamoyltransferase [EC:2.3.1.133]	486								LOC_Os04g52670.1	LOC_Os02g39850.1		LOC_Os07g35340		LOC_Os04g53120.1	protein|NB-ARC domain containing protein, expressed
LOC_Os03g12890.2		LOC_Os11g07960.1 (448)	K13065	E2.3.1.133, HCT; shikimate O-hydroxycinnamoyltransferase [EC:2.3.1.133]	171								LOC_Os04g52810.1	LOC_Os11g07960.1		LOC_Os07g35370		LOC_Os04g54080.1	protein|serine/threonine-protein kinase receptor precursor, putative, expressed
LOC_Os03g12890.3		LOC_Os04g56910.1 (450)	K13065	E2.3.1.133, HCT; shikimate O-hydroxycinnamoyltransferase [EC:2.3.1.133]	215								LOC_Os04g53120.1	LOC_Os04g56910.1		LOC_Os07g35390		LOC_Os04g54310.1	protein|expressed protein
LOC_Os03g12890.4		LOC_Os04g42250.2 (443)	K13065	E2.3.1.133, HCT; shikimate O-hydroxycinnamoyltransferase [EC:2.3.1.133]	512								LOC_Os04g54080.1	LOC_Os04g42250.2		LOC_Os07g35480		LOC_Os04g58280.1	protein|stem-specific protein TSJT1, putative, expressed
LOC_Os03g12890.5		LOC_Os04g42250.3 (443)	K13065	E2.3.1.133, HCT; shikimate O-hydroxycinnamoyltransferase [EC:2.3.1.133]	512								LOC_Os04g54310.1	LOC_Os04g42250.3		LOC_Os07g35540		LOC_Os04g58280.2	protein|stem-specific protein TSJT1, putative, expressed
LOC_Os03g16350.1		LOC_Os04g42250.4 (443)	K13065	E2.3.1.133, HCT; shikimate O-hydroxycinnamoyltransferase [EC:2.3.1.133]	512								LOC_Os04g58280.1	LOC_Os04g42250.4		LOC_Os07g35560		LOC_Os05g04584.1	protein|transferase family protein, putative, expressed
LOC_Os03g16390.1		LOC_Os09g10760.1 (246)	K13126	PABPC; polyadenylate-binding protein	144								LOC_Os04g58280.2	LOC_Os09g10760.1		LOC_Os07g35750		LOC_Os05g07940.1	protein|glyoxalase family protein, putative, expressed
LOC_Os03g16950.1		LOC_Os01g61080.1 (556)	K13424	WRKY33; WRKY transcription factor 33	300								LOC_Os05g04584.1	LOC_Os01g61080.1		LOC_Os07g35810		LOC_Os05g07940.2	protein|glyoxalase family protein, putative, expressed
LOC_Os03g16960.1		LOC_Os05g39720.1 (573)	K13424	WRKY33; WRKY transcription factor 33	235								LOC_Os05g07940.1	LOC_Os05g39720.1		LOC_Os07g40000		LOC_Os05g07940.3	protein|glyoxalase family protein, putative, expressed
LOC_Os03g17690.1		LOC_Os12g04360.1 (196)	K13448	CML; calcium-binding protein CML	52								LOC_Os05g07940.2	LOC_Os12g04360.1		LOC_Os07g41230		LOC_Os05g07940.4	protein|glyoxalase family protein, putative, expressed
LOC_Os03g17690.2		LOC_Os11g04560.1 (196)	K13448	CML; calcium-binding protein CML	52								LOC_Os05g07940.3	LOC_Os11g04560.1		LOC_Os07g43800		LOC_Os05g07940.5	protein|glyoxalase family protein, putative, expressed
LOC_Os03g17700.1		LOC_Os01g28450.1 (165)	K13449	PR1; pathogenesis-related protein 1	162								LOC_Os05g07940.4	LOC_Os01g28450.1		LOC_Os07g46030		LOC_Os05g08420.1	protein|expressed protein
LOC_Os03g17790.1		LOC_Os07g03710.1 (169)	K13449	PR1; pathogenesis-related protein 1	156								LOC_Os05g07940.5	LOC_Os07g03710.1		LOC_Os07g46060		LOC_Os05g08420.2	protein|expressed protein
LOC_Os03g18130.1		LOC_Os07g03730.1 (166)	K13449	PR1; pathogenesis-related protein 1	165								LOC_Os05g08420.1	LOC_Os07g03730.1		LOC_Os07g46852		LOC_Os05g08620.1	protein|expressed protein
LOC_Os03g18130.2		LOC_Os11g11940.1 (977)	K13457	RPM1, RPS3; disease resistance protein RPM1	74								LOC_Os05g08620.1	LOC_Os11g11940.1		LOC_Os07g47670		LOC_Os05g08750.1	protein|UDP-glucoronosyl and UDP-glucosyl transferase domain containing protein, expressed
LOC_Os03g18130.3		LOC_Os11g11960.1 (824)	K13457	RPM1, RPS3; disease resistance protein RPM1	299								LOC_Os05g08750.1	LOC_Os11g11960.1		LOC_Os07g48450		LOC_Os05g09020.1	protein|WRKY67, expressed
LOC_Os03g18130.4		LOC_Os11g12340.1 (902)	K13457	RPM1, RPS3; disease resistance protein RPM1	221								LOC_Os05g09020.1	LOC_Os11g12340.1		LOC_Os07g48510		LOC_Os05g09020.2	protein|WRKY67, expressed
LOC_Os03g18600.1		LOC_Os11g12340.2 (902)	K13457	RPM1, RPS3; disease resistance protein RPM1	221								LOC_Os05g09020.2	LOC_Os11g12340.2		LOC_Os07g48550		LOC_Os05g17604.1	protein|SHR5-receptor-like kinase, putative, expressed
LOC_Os03g19010.1		LOC_Os11g34920.1 (915)	K13457	RPM1, RPS3; disease resistance protein RPM1	137								LOC_Os05g17604.1	LOC_Os11g34920.1		LOC_Os08g05320		LOC_Os05g17604.3	protein|SHR5-receptor-like kinase, putative, expressed
LOC_Os03g19700.1		LOC_Os04g43440.1 (909)	K13459	RPS2; disease resistance protein RPS2	178								LOC_Os05g17604.2	LOC_Os04g43440.1		LOC_Os08g07100		LOC_Os05g19910.1	protein|transferase family protein, putative, expressed
LOC_Os03g19990.1		LOC_Os10g25290.1 (172)	K13464	JAZ; jasmonate ZIM domain-containing protein	28								LOC_Os05g17604.3	LOC_Os10g25290.1		LOC_Os08g10290		LOC_Os05g25390.1	protein|tyrosine protein kinase domain containing protein, putative, expressed
LOC_Os03g20090.1		LOC_Os01g12710.1 (505)	K13606	NOL, NYC1; chlorophyll(ide) b reductase [EC:1.1.1.294]	421								LOC_Os05g17604.4	LOC_Os01g12710.1		LOC_Os08g10310		LOC_Os05g25770.1	protein|WRKY45, expressed
LOC_Os03g20420.1		LOC_Os01g12710.2 (414)	K13606	NOL, NYC1; chlorophyll(ide) b reductase [EC:1.1.1.294]	310								LOC_Os05g17604.5	LOC_Os01g12710.2		LOC_Os08g10320		LOC_Os05g26040.1	protein|pumilio-family RNA binding repeat containing protein, expressed
LOC_Os03g20420.2		LOC_Os09g34214.1 (483)	K13691	SGT1; pathogen-inducible salicylic acid glucosyltransferase [EC:2.4.1.-]	284								LOC_Os05g17604.6	LOC_Os09g34214.1		LOC_Os08g13440		LOC_Os05g27660.1	protein|expressed protein
LOC_Os03g20420.3		LOC_Os04g12960.1 (463)	K13691	SGT1; pathogen-inducible salicylic acid glucosyltransferase [EC:2.4.1.-]	187								LOC_Os05g19910.1	LOC_Os04g12960.1		LOC_Os08g15710		LOC_Os05g27780.1	protein|expressed protein
LOC_Os03g20840.1		LOC_Os02g54254.1 (1062)	K14157	AASS; alpha-aminoadipic semialdehyde synthase [EC:1.5.1.8 1.5.1.9]	901								LOC_Os05g25390.1	LOC_Os02g54254.1		LOC_Os08g15780		LOC_Os05g28740.1	protein|universal stress protein domain containing protein, putative, expressed
LOC_Os03g21230.1		LOC_Os02g54254.2 (1040)	K14157	AASS; alpha-aminoadipic semialdehyde synthase [EC:1.5.1.8 1.5.1.9]	864								LOC_Os05g25770.1	LOC_Os02g54254.2		LOC_Os08g16050		LOC_Os05g30010.1	protein|WD domain, G-beta repeat domain containing protein, expressed
LOC_Os03g22790.1		LOC_Os02g54254.3 (534)	K14157	AASS; alpha-aminoadipic semialdehyde synthase [EC:1.5.1.8 1.5.1.9]	234								LOC_Os05g26040.1	LOC_Os02g54254.3		LOC_Os08g24310		LOC_Os05g31160.1	protein|peptide chain release factor 2, putative, expressed
LOC_Os03g24730.1		LOC_Os02g54254.4 (228)	K14157	AASS; alpha-aminoadipic semialdehyde synthase [EC:1.5.1.8 1.5.1.9]	33								LOC_Os05g27660.1	LOC_Os02g54254.4		LOC_Os08g29020		LOC_Os05g31160.2	protein|peptide chain release factor 2, putative, expressed
LOC_Os11g44960.1		LOC_Os02g09810.1 (460)	K14207	SLC38A2, SNAT2; solute carrier family 38 (sodium-coupled neutral amino acid transporter), member 2	474								LOC_Os05g27780.1	LOC_Os02g09810.1		LOC_Os08g29570		LOC_Os05g37520.1	protein|expressed protein
LOC_Os11g44990.1		LOC_Os02g09810.2 (460)	K14207	SLC38A2, SNAT2; solute carrier family 38 (sodium-coupled neutral amino acid transporter), member 2	474								LOC_Os05g28740.1	LOC_Os02g09810.2		LOC_Os08g30770		LOC_Os05g37520.2	protein|expressed protein
LOC_Os11g45050.1		LOC_Os02g09810.3 (460)	K14207	SLC38A2, SNAT2; solute carrier family 38 (sodium-coupled neutral amino acid transporter), member 2	474								LOC_Os05g30010.1	LOC_Os02g09810.3		LOC_Os08g33350		LOC_Os05g39260.1	protein|zinc finger, C3HC4 type domain containing protein, expressed
LOC_Os11g45130.1		LOC_Os02g44980.1 (423)	K14209	SLC36A, PAT; solute carrier family 36 (proton-coupled amino acid transporter)	382								LOC_Os05g31160.1	LOC_Os02g44980.1		LOC_Os08g37670		LOC_Os05g45020.1	protein|zinc finger/CCCH transcription factor, putative, expressed
LOC_Os11g45190.1		LOC_Os03g60260.1 (419)	K14209	SLC36A, PAT; solute carrier family 36 (proton-coupled amino acid transporter)	299								LOC_Os05g31160.2	LOC_Os03g60260.1		LOC_Os08g39660		LOC_Os05g46020.1	protein|WRKY7, expressed
LOC_Os11g45740.1		LOC_Os04g47780.1 (426)	K14209	SLC36A, PAT; solute carrier family 36 (proton-coupled amino acid transporter)	378								LOC_Os05g37520.1	LOC_Os04g47780.1		LOC_Os08g39694		LOC_Os05g46460.1	protein|hydrolase, alpha/beta fold family domain containing protein, expressed
LOC_Os11g47560.1		LOC_Os06g50040.1 (142)	K14488	SAUR; SAUR family protein	24								LOC_Os05g37520.2	LOC_Os06g50040.1		LOC_Os08g39730		LOC_Os05g46460.3	protein|hydrolase, alpha/beta fold family domain containing protein, expressed
LOC_Os11g47600.1		LOC_Os03g18600.1 (230)	K14496	PYL; abscisic acid receptor PYR/PYL family	115								LOC_Os05g39260.1	LOC_Os03g18600.1		LOC_Os09g04160		LOC_Os05g46460.4	protein|hydrolase, alpha/beta fold family domain containing protein, expressed
LOC_Os11g47680.1		LOC_Os04g59480.1 (511)	K14638	SLC15A3_4, PHT; solute carrier family 15 (peptide/histidine transporter), member 3/4	277								LOC_Os05g45020.1	LOC_Os04g59480.1		LOC_Os09g16950		LOC_Os05g46460.5	protein|hydrolase, alpha/beta fold family domain containing protein, expressed
LOC_Os12g01490.1		LOC_Os05g35650.1 (582)	K14638	SLC15A3_4, PHT; solute carrier family 15 (peptide/histidine transporter), member 3/4	310								LOC_Os05g46020.1	LOC_Os05g35650.1		LOC_Os09g18020		LOC_Os05g46460.6	protein|hydrolase, alpha/beta fold family domain containing protein, expressed
LOC_Os12g03040.1		LOC_Os05g35650.2 (582)	K14638	SLC15A3_4, PHT; solute carrier family 15 (peptide/histidine transporter), member 3/4	310								LOC_Os05g46460.1	LOC_Os05g35650.2		LOC_Os09g18159		LOC_Os05g47750.1	protein|Ser/Thr protein kinase, putative, expressed
LOC_Os12g04360.1		LOC_Os06g15370.1 (598)	K14638	SLC15A3_4, PHT; solute carrier family 15 (peptide/histidine transporter), member 3/4	358								LOC_Os05g46460.3	LOC_Os06g15370.1		LOC_Os09g18260		LOC_Os05g50090.1	protein|oxidoreductase, 2OG-FeII oxygenase domain containing protein, putative, expressed
LOC_Os12g04440.1		LOC_Os06g49250.1 (548)	K14638	SLC15A3_4, PHT; solute carrier family 15 (peptide/histidine transporter), member 3/4	403								LOC_Os05g46460.4	LOC_Os06g49250.1		LOC_Os09g18360		LOC_Os05g50190.1	protein|protein kinase domain containing protein, expressed
LOC_Os12g04440.2		LOC_Os06g49250.2 (503)	K14638	SLC15A3_4, PHT; solute carrier family 15 (peptide/histidine transporter), member 3/4	351								LOC_Os05g46460.5	LOC_Os06g49250.2		LOC_Os09g24580		LOC_Os06g02540.1	protein|expressed protein
LOC_Os12g04990.1		LOC_Os06g49250.3 (422)	K14638	SLC15A3_4, PHT; solute carrier family 15 (peptide/histidine transporter), member 3/4	232								LOC_Os05g46460.6	LOC_Os06g49250.3		LOC_Os09g27010		LOC_Os06g02540.2	protein|expressed protein
LOC_Os12g04990.2		LOC_Os06g49250.4 (491)	K14638	SLC15A3_4, PHT; solute carrier family 15 (peptide/histidine transporter), member 3/4	242								LOC_Os05g47750.1	LOC_Os06g49250.4		LOC_Os09g28180		LOC_Os06g03830.1	protein|retinol dehydrogenase, putative, expressed
LOC_Os12g04990.3		LOC_Os06g49250.5 (422)	K14638	SLC15A3_4, PHT; solute carrier family 15 (peptide/histidine transporter), member 3/4	232								LOC_Os05g50090.1	LOC_Os06g49250.5		LOC_Os09g28210		LOC_Os06g03830.2	protein|retinol dehydrogenase, putative, expressed
LOC_Os12g04990.4		LOC_Os07g38430.1 (339)	K14963	WDR5, SWD3, CPS30; COMPASS component SWD3	215	K10268	8						LOC_Os05g50190.1	LOC_Os07g38430.1		LOC_Os09g29540		LOC_Os06g09260.1	protein|expressed protein
LOC_Os12g04990.5		LOC_Os04g38680.1 (456)	K15015	SLC32A, VGAT; solute carrier family 32 (vesicular inhibitory amino acid transporter)	320								LOC_Os06g02540.1	LOC_Os04g38680.1		LOC_Os09g29560		LOC_Os06g13560.1	protein|SAM dependent carboxyl methyltransferase, putative, expressed
LOC_Os12g10590.1		LOC_Os08g40430.1 (334)	K15032	MTERFD; mTERF domain-containing protein, mitochondrial	229								LOC_Os06g02540.2	LOC_Os08g40430.1		LOC_Os09g31200		LOC_Os06g13560.2	protein|SAM dependent carboxyl methyltransferase, putative, expressed
LOC_Os12g17160.1		LOC_Os01g36070.1 (244)	K15382	SLC50A, SWEET; solute carrier family 50 (sugar transporter)	185								LOC_Os06g03830.1	LOC_Os01g36070.1		LOC_Os09g32330		LOC_Os06g13560.3	protein|SAM dependent carboxyl methyltransferase, putative, expressed
LOC_Os12g19030.1		LOC_Os11g31190.1 (304)	K15382	SLC50A, SWEET; solute carrier family 50 (sugar transporter)	189								LOC_Os06g03830.2	LOC_Os11g31190.1		LOC_Os09g35580		LOC_Os06g13560.4	protein|SAM dependent carboxyl methyltransferase, putative, expressed
LOC_Os12g24020.1		LOC_Os06g39750.1 (520)	K15397	KCS; 3-ketoacyl-CoA synthase [EC:2.3.1.199]	484								LOC_Os06g09260.1	LOC_Os06g39750.1		LOC_Os09g37330		LOC_Os06g13560.5	protein|SAM dependent carboxyl methyltransferase, putative, expressed
LOC_Os12g24020.2		LOC_Os06g39750.2 (520)	K15397	KCS; 3-ketoacyl-CoA synthase [EC:2.3.1.199]	484								LOC_Os06g13560.1	LOC_Os06g39750.2		LOC_Os09g39770		LOC_Os06g15330.1	protein|CCT/B-box zinc finger protein, putative, expressed
LOC_Os12g24020.3		LOC_Os06g39750.3 (520)	K15397	KCS; 3-ketoacyl-CoA synthase [EC:2.3.1.199]	484								LOC_Os06g13560.2	LOC_Os06g39750.3		LOC_Os10g03850		LOC_Os06g19070.1	protein|cytochrome P450, putative, expressed
LOC_Os12g24320.1		LOC_Os02g40784.1 (620)	K15404	K15404, CER1; aldehyde decarbonylase [EC:4.1.99.5]	503								LOC_Os06g13560.3	LOC_Os02g40784.1		LOC_Os10g04490		LOC_Os06g19370.1	protein|cadmium tolerance factor, putative, expressed
LOC_Os12g24650.1		LOC_Os02g40784.3 (585)	K15404	K15404, CER1; aldehyde decarbonylase [EC:4.1.99.5]	445								LOC_Os06g13560.4	LOC_Os02g40784.3		LOC_Os10g05250		LOC_Os06g19370.2	protein|cadmium tolerance factor, putative, expressed
LOC_Os12g26470.1		LOC_Os01g05060.1 (276)	K15414	C1QBP; complement component 1 Q subcomponent-binding protein, mitochondrial	105								LOC_Os06g15330.1	LOC_Os01g05060.1		LOC_Os10g12050		LOC_Os06g20200.1	protein|gibberellin receptor GID1L2, putative, expressed
LOC_Os12g28550.1		LOC_Os03g49350.1 (698)	K15718	LOX1_5; linoleate 9S-lipoxygenase [EC:1.13.11.58]	487								LOC_Os06g19070.1	LOC_Os03g49350.1		LOC_Os10g17489		LOC_Os06g24990.1	protein|xylanase inhibitor protein 1 precursor, putative, expressed
LOC_Os12g29330.1		LOC_Os03g08624.1 (342)	K15891	FLDH; NAD+-dependent farnesol dehydrogenase [EC:1.1.1.354]	278								LOC_Os06g19370.1	LOC_Os03g08624.1		LOC_Os10g21590		LOC_Os06g38830.1	protein|receptor-like protein kinase precursor, putative, expressed
LOC_Os12g30180.1		LOC_Os09g17560.1 (365)	K16040	ROMT; trans-resveratrol di-O-methyltransferase [EC:2.1.1.240]	44								LOC_Os06g19370.2	LOC_Os09g17560.1		LOC_Os10g23050		LOC_Os06g44170.1	protein|NAD dependent epimerase/dehydratase family protein, putative, expressed
LOC_Os12g32280.1		LOC_Os05g44100.1 (900)	K16055	TPS; trehalose 6-phosphate synthase/phosphatase [EC:2.4.1.15 3.1.3.12]	736								LOC_Os06g20200.1	LOC_Os05g44100.1		LOC_Os10g25550		LOC_Os06g44170.2	protein|NAD dependent epimerase/dehydratase family protein, putative, expressed
LOC_Os12g35340.1		LOC_Os12g19030.1 (547)	K16280	RGLG; E3 ubiquitin-protein ligase RGLG [EC:2.3.2.27]	270								LOC_Os06g24990.1	LOC_Os12g19030.1		LOC_Os10g30450		LOC_Os06g45140.1	protein|bZIP transcription factor domain containing protein, expressed
LOC_Os12g36110.1		LOC_Os04g49160.1 (163)	K16281	RHA1; RING-H2 zinc finger protein RHA1	26								LOC_Os06g38830.1	LOC_Os04g49160.1		LOC_Os10g33040		LOC_Os06g45140.2	protein|bZIP transcription factor domain containing protein, expressed
LOC_Os12g36940.1		LOC_Os04g43550.1 (138)	K16904	DCTPP1; dCTP diphosphatase [EC:3.6.1.12]	76								LOC_Os06g44170.1	LOC_Os04g43550.1		LOC_Os10g33080		LOC_Os06g45140.3	protein|bZIP transcription factor domain containing protein, expressed
LOC_Os12g38150.1		LOC_Os11g05800.1 (218)	K17338	REEP1_2_3_4; receptor expression-enhancing protein 1/2/3/4	32								LOC_Os06g44170.2	LOC_Os11g05800.1		LOC_Os10g33130		LOC_Os06g48250.1	protein|ATPase, putative, expressed
LOC_Os12g38170.1		LOC_Os06g48300.1 (328)	K17506	PPM1L, PP2CE; protein phosphatase 1L [EC:3.1.3.16]	279								LOC_Os06g45140.1	LOC_Os06g48300.1		LOC_Os10g33210		LOC_Os06g49390.1	protein|NBS-LRR disease resistance protein, putative, expressed
LOC_Os12g38770.1		LOC_Os03g29190.1 (589)	K17609	NXN; nucleoredoxin [EC:1.8.1.8]	368								LOC_Os06g45140.2	LOC_Os03g29190.1		LOC_Os10g34350		LOC_Os07g03740.1	protein|SCP-like extracellular protein, expressed
LOC_Os12g41680.1		LOC_Os03g29190.2 (570)	K17609	NXN; nucleoredoxin [EC:1.8.1.8]	378								LOC_Os06g45140.3	LOC_Os03g29190.2		LOC_Os10g34910		LOC_Os07g04040.1	protein|expressed protein
LOC_Os12g43410.1		LOC_Os02g40840.1 (771)	K17756	FAO3; long-chain-alcohol oxidase [EC:1.1.3.20]	536								LOC_Os06g48250.1	LOC_Os02g40840.1		LOC_Os10g35460		LOC_Os07g06800.1	protein|3-oxo-5-alpha-steroid 4-dehydrogenase, putative, expressed
LOC_Os12g44030.1		LOC_Os04g43200.1 (245)	K17991	PXG; peroxygenase [EC:1.11.2.3]	239								LOC_Os06g49390.1	LOC_Os04g43200.1		LOC_Os10g36480		LOC_Os07g06850.1	protein|gibberellin receptor GID1L2, putative, expressed
LOC_Os12g44050.1		LOC_Os04g43200.2 (180)	K17991	PXG; peroxygenase [EC:1.11.2.3]	153								LOC_Os07g03740.1	LOC_Os04g43200.2		LOC_Os10g39100		LOC_Os07g08150.1	protein|early light-induced protein, chloroplast precursor, putative, expressed
LOC_Os09g18260.1		LOC_Os02g17360.1 (748)	K18213	PRORP; proteinaceous RNase P [EC:3.1.26.5]	351								LOC_Os07g04040.1	LOC_Os02g17360.1		LOC_Os10g40640		LOC_Os07g09010.1	protein|nodulin, putative, expressed
LOC_Os09g18360.1		LOC_Os02g17360.2 (720)	K18213	PRORP; proteinaceous RNase P [EC:3.1.26.5]	358								LOC_Os07g06800.1	LOC_Os02g17360.2		LOC_Os10g40934		LOC_Os07g09420.1	protein|ATPase, putative, expressed
LOC_Os09g19830.1		LOC_Os05g47660.1 (380)	K18693	DPP1, DPPL, PLPP4_5; diacylglycerol diphosphate phosphatase / phosphatidate phosphatase [EC:3.1.3.81 3.1.3.4]	171								LOC_Os07g06850.1	LOC_Os05g47660.1		LOC_Os10g43060		LOC_Os07g14150.1	protein|cytidine deaminase, putative, expressed
LOC_Os09g19952.1		LOC_Os03g63700.1 (189)	K19761	GGACT; gamma-glutamylaminecyclotransferase [EC:2.3.2.-]	115								LOC_Os07g08150.1	LOC_Os03g63700.1		LOC_Os11g03300		LOC_Os07g14150.2	protein|cytidine deaminase, putative, expressed
LOC_Os09g19954.1		LOC_Os10g21194.1 (543)	K20000	matK; maturase K	155								LOC_Os07g09010.1	LOC_Os10g21194.1		LOC_Os11g03370		LOC_Os07g14150.3	protein|cytidine deaminase, putative, expressed
LOC_Os09g24580.1		LOC_Os03g17700.1 (370)	K20536	MPK3; mitogen-activated protein kinase 3 [EC:2.7.11.24]	376								LOC_Os07g09420.1	LOC_Os03g17700.1		LOC_Os11g03820		LOC_Os07g14150.4	protein|cytidine deaminase, putative, expressed
LOC_Os09g27010.1		LOC_Os03g04060.1 (257)	K20547	CHIB; basic endochitinase B [EC:3.2.1.14]	171								LOC_Os07g14150.1	LOC_Os03g04060.1		LOC_Os11g07120		LOC_Os07g14150.5	protein|cytidine deaminase, putative, expressed
LOC_Os09g27950.1		LOC_Os10g39680.1 (262)	K20547	CHIB; basic endochitinase B [EC:3.2.1.14]	183								LOC_Os07g14150.2	LOC_Os10g39680.1		LOC_Os11g07200		LOC_Os07g14150.6	protein|cytidine deaminase, putative, expressed
LOC_Os09g28180.1		LOC_Os10g39700.1 (179)	K20547	CHIB; basic endochitinase B [EC:3.2.1.14]	30								LOC_Os07g14150.3	LOC_Os10g39700.1		LOC_Os11g07440		LOC_Os07g14150.7	protein|cytidine deaminase, putative, expressed
LOC_Os09g28210.1		LOC_Os06g51060.1 (350)	K20547	CHIB; basic endochitinase B [EC:3.2.1.14]	235								LOC_Os07g14150.4	LOC_Os06g51060.1		LOC_Os11g10120		LOC_Os07g33580.1	protein|cytochrome P450, putative, expressed
LOC_Os09g28354.1		LOC_Os04g40470.1 (512)	K20617	CYP71A; cytochrome P450 family 71 subfamily A	324								LOC_Os07g14150.5	LOC_Os04g40470.1		LOC_Os11g17380		LOC_Os07g33610.1	protein|cytochrome P450, putative, expressed
LOC_Os09g29540.1		LOC_Os01g63930.1 (525)	K20624	CYP94C1; 12-hydroxyjasmonoyl-L-amino acid 12-hydroxylase / fatty acid hydroxylase [EC:1.14.14.49]	488								LOC_Os07g14150.6	LOC_Os01g63930.1		LOC_Os11g29710		LOC_Os07g33610.2	protein|cytochrome P450, putative, expressed
LOC_Os09g29560.1		LOC_Os01g63930.2 (525)	K20624	CYP94C1; 12-hydroxyjasmonoyl-L-amino acid 12-hydroxylase / fatty acid hydroxylase [EC:1.14.14.49]	488								LOC_Os07g14150.7	LOC_Os01g63930.2		LOC_Os11g29870		LOC_Os07g34850.1	protein|aspartic proteinase nepenthesin, putative, expressed
LOC_Os09g31200.1		LOC_Os09g27950.1 (394)	K20855	B3GALT1S; beta-1,3-galactosyltransferase 1/2/3/4/5/7/8 [EC:2.4.1.-]	362								LOC_Os07g33580.1	LOC_Os09g27950.1		LOC_Os11g31900		LOC_Os07g35310.1	protein|TKL_IRAK_DUF26-lc.12 - DUF26 kinases have homology to DUF26 containing loci, expressed
LOC_Os09g31478.1		LOC_Os01g52710.1 (537)	K20867	GAUT12S; galacturonosyltransferase 12/13/14/15 [EC:2.4.1.-]	282								LOC_Os07g33610.1	LOC_Os01g52710.1		LOC_Os11g32500		LOC_Os07g35310.2	protein|TKL_IRAK_DUF26-lc.12 - DUF26 kinases have homology to DUF26 containing loci, expressed
LOC_Os09g31478.2		LOC_Os11g15040.1 (204)	K21483	SAMT; salicylate 1-O-methyltransferase [EC:2.1.1.274]	19								LOC_Os07g33610.2	LOC_Os11g15040.1		LOC_Os11g33970		LOC_Os07g35330.1	protein|TKL_IRAK_DUF26-lc.13 - DUF26 kinases have homology to DUF26 containing loci, expressed
LOC_Os09g32290.1		LOC_Os11g15040.2 (204)	K21483	SAMT; salicylate 1-O-methyltransferase [EC:2.1.1.274]	19								LOC_Os07g34850.1	LOC_Os11g15040.2		LOC_Os11g36200		LOC_Os07g35340.1	protein|TKL_IRAK_DUF26-lc.14 - DUF26 kinases have homology to DUF26 containing loci, expressed
LOC_Os09g32290.2		LOC_Os11g15040.3 (204)	K21483	SAMT; salicylate 1-O-methyltransferase [EC:2.1.1.274]	19								LOC_Os07g35310.1	LOC_Os11g15040.3		LOC_Os11g37950		LOC_Os07g35340.2	protein|TKL_IRAK_DUF26-lc.14 - DUF26 kinases have homology to DUF26 containing loci, expressed
LOC_Os09g32330.1		LOC_Os11g15040.4 (204)	K21483	SAMT; salicylate 1-O-methyltransferase [EC:2.1.1.274]	19								LOC_Os07g35310.2	LOC_Os11g15040.4		LOC_Os11g38870		LOC_Os07g35340.3	protein|TKL_IRAK_DUF26-lc.14 - DUF26 kinases have homology to DUF26 containing loci, expressed
LOC_Os09g34214.1		LOC_Os11g15040.5 (204)	K21483	SAMT; salicylate 1-O-methyltransferase [EC:2.1.1.274]	19								LOC_Os07g35330.1	LOC_Os11g15040.5		LOC_Os11g44960		LOC_Os07g35370.1	protein|TKL_IRAK_DUF26-lc.15 - DUF26 kinases have homology to DUF26 containing loci, expressed
LOC_Os09g35580.1		LOC_Os06g13560.5 (256)	K21483	SAMT; salicylate 1-O-methyltransferase [EC:2.1.1.274]	48								LOC_Os07g35340.1	LOC_Os06g13560.5		LOC_Os11g44990		LOC_Os07g35390.1	protein|TKL_IRAK_DUF26-lc.17 - DUF26 kinases have homology to DUF26 containing loci, expressed
LOC_Os09g36200.1		LOC_Os06g20960.1 (360)	K21483	SAMT; salicylate 1-O-methyltransferase [EC:2.1.1.274]	72								LOC_Os07g35340.2	LOC_Os06g20960.1		LOC_Os11g45050		LOC_Os07g35410.1	protein|TKL_IRAK_DUF26-lc.18 - DUF26 kinases have homology to DUF26 containing loci, expressed
LOC_Os09g37330.1		LOC_Os01g51060.1 (457)	K21604	IAR3, ILL6; jasmonoyl-L-amino acid hydrolase [EC:3.5.1.127]	46	K14664	31						LOC_Os07g35340.3	LOC_Os01g51060.1		LOC_Os11g45130		LOC_Os07g35480.1	protein|glucan endo-1,3-beta-glucosidase precursor, putative, expressed
LOC_Os09g37540.1		LOC_Os01g52070.1 (594)	K21867	AKT, KAT, GORK, SKOR; potassium channel	351								LOC_Os07g35370.1	LOC_Os01g52070.1		LOC_Os11g45190		LOC_Os07g35480.2	protein|glucan endo-1,3-beta-glucosidase precursor, putative, expressed
LOC_Os09g39770.1		LOC_Os09g36200.1 (275)	K22013	SGR, SGRL; magnesium dechelatase [EC:4.99.1.10]	209								LOC_Os07g35390.1	LOC_Os09g36200.1		LOC_Os11g47680		LOC_Os07g35480.3	protein|glucan endo-1,3-beta-glucosidase precursor, putative, expressed
LOC_Os10g02070.1		LOC_Os07g36800.1 (111)	K22139	MPC2; mitochondrial pyruvate carrier 2	113								LOC_Os07g35480.1	LOC_Os07g36800.1		LOC_Os12g01490		LOC_Os07g35540.1	protein|TKL_IRAK_DUF26-lc.19 - DUF26 kinases have homology to DUF26 containing loci, expressed
LOC_Os10g03850.1		LOC_Os07g36800.2 (111)	K22139	MPC2; mitochondrial pyruvate carrier 2	113								LOC_Os07g35480.2	LOC_Os07g36800.2		LOC_Os12g03040		LOC_Os07g35560.1	protein|glucan endo-1,3-beta-glucosidase precursor, putative, expressed
LOC_Os10g03850.2		LOC_Os12g38770.1 (565)	K22390	ACP7; acid phosphatase type 7	462								LOC_Os07g35480.3	LOC_Os12g38770.1		LOC_Os12g17160		LOC_Os07g35560.2	protein|glucan endo-1,3-beta-glucosidase precursor, putative, expressed
LOC_Os10g03850.3		LOC_Os12g44030.1 (338)	K22390	ACP7; acid phosphatase type 7	181								LOC_Os07g35540.1	LOC_Os12g44030.1		LOC_Os12g24020		LOC_Os07g35560.3	protein|glucan endo-1,3-beta-glucosidase precursor, putative, expressed
LOC_Os10g04490.1		LOC_Os09g37540.1 (228)	K22522	LOG; cytokinin riboside 5'-monophosphate phosphoribohydrolase [EC:3.2.2.-]	154								LOC_Os07g35560.1	LOC_Os09g37540.1		LOC_Os12g24320		LOC_Os07g35750.1	protein|TKL_IRAK_DUF26-ld.3 - DUF26 kinases have homology to DUF26 containing loci, expressed
LOC_Os10g05250.1		LOC_Os03g09060.1 (370)	K23094	ABC4, menA; 2-carboxy-1,4-naphthoquinone phytyltransferase [EC:2.5.1.130]	335								LOC_Os07g35560.2	LOC_Os03g09060.1		LOC_Os12g26470		LOC_Os07g35750.2	protein|TKL_IRAK_DUF26-ld.3 - DUF26 kinases have homology to DUF26 containing loci, expressed
LOC_Os10g12050.1		LOC_Os03g03034.1 (343)	K24028	DMR6, DLO; salicylic acid 3-hydroxylase [EC:1.14.11.-]	400								LOC_Os07g35560.3	LOC_Os03g03034.1		LOC_Os12g28550		LOC_Os07g35810.1	protein|TKL_IRAK_DUF26-ld.6 - DUF26 kinases have homology to DUF26 containing loci, expressed
LOC_Os10g12050.2		LOC_Os03g03034.2 (273)	K24028	DMR6, DLO; salicylic acid 3-hydroxylase [EC:1.14.11.-]	252								LOC_Os07g35750.1	LOC_Os03g03034.2		LOC_Os12g29330		LOC_Os07g40000.1	protein|DUF260 domain containing protein, putative, expressed
LOC_Os10g12080.1		LOC_Os03g03034.3 (172)	K24028	DMR6, DLO; salicylic acid 3-hydroxylase [EC:1.14.11.-]	40								LOC_Os07g35750.2	LOC_Os03g03034.3		LOC_Os12g30180		LOC_Os07g41230.1	protein|esterase, putative, expressed
LOC_Os10g17489.1		LOC_Os03g03034.4 (287)	K24028	DMR6, DLO; salicylic acid 3-hydroxylase [EC:1.14.11.-]	287								LOC_Os07g35810.1	LOC_Os03g03034.4		LOC_Os12g32280		LOC_Os07g43800.1	protein|EF hand family protein, putative, expressed
LOC_Os10g21194.1		LOC_Os03g03034.5 (197)	K24028	DMR6, DLO; salicylic acid 3-hydroxylase [EC:1.14.11.-]	41								LOC_Os07g40000.1	LOC_Os03g03034.5		LOC_Os12g36110		LOC_Os07g46030.1	protein|expressed protein
LOC_Os10g21300.1		LOC_Os04g49194.1 (341)	K24028	DMR6, DLO; salicylic acid 3-hydroxylase [EC:1.14.11.-]	335								LOC_Os07g41230.1	LOC_Os04g49194.1		LOC_Os12g36940		LOC_Os07g46060.1	protein|expressed protein
LOC_Os10g21314.1		LOC_Os09g31478.1 (414)	K24139	PILS, ECM3; auxin efflux carrier family protein	262								LOC_Os07g43800.1	LOC_Os09g31478.1		LOC_Os12g38150		LOC_Os07g46852.1	protein|sex determination protein tasselseed-2, putative, expressed
LOC_Os10g21346.1		LOC_Os09g31478.2 (380)	K24139	PILS, ECM3; auxin efflux carrier family protein	210								LOC_Os07g46030.1	LOC_Os09g31478.2		LOC_Os12g38170		LOC_Os07g46852.2	protein|sex determination protein tasselseed-2, putative, expressed
LOC_Os10g21418.1		LOC_Os02g36440.1 (555)	K24193	STP; MFS transporter, SP family, sugar:H+ symporter	182								LOC_Os07g46060.1	LOC_Os02g36440.1		LOC_Os12g41680		LOC_Os07g47670.1	protein|hypoxia-responsive family protein, putative, expressed
LOC_Os10g21590.1		LOC_Os02g36450.1 (519)	K24193	STP; MFS transporter, SP family, sugar:H+ symporter	194								LOC_Os07g46852.1	LOC_Os02g36450.1		LOC_Os12g43410		LOC_Os07g47670.2	protein|hypoxia-responsive family protein, putative, expressed
LOC_Os10g21590.2		LOC_Os02g36450.2 (482)	K24193	STP; MFS transporter, SP family, sugar:H+ symporter	162								LOC_Os07g46852.2	LOC_Os02g36450.2		LOC_Os12g44050		LOC_Os07g48450.1	protein|no apical meristem protein, putative, expressed
LOC_Os10g23050.1		LOC_Os07g37320.1 (531)	K24193	STP; MFS transporter, SP family, sugar:H+ symporter	471								LOC_Os07g46852.3	LOC_Os07g37320.1				LOC_Os07g48450.2	protein|no apical meristem protein, putative, expressed
LOC_Os10g25290.1		LOC_Os06g46950.1 (126)	K24345	KIC; calcium-binding protein KIC and related proteins	59								LOC_Os07g46852.4	LOC_Os06g46950.1				LOC_Os07g48450.3	protein|no apical meristem protein, putative, expressed
LOC_Os10g25550.1		LOC_Os01g02390.1 (660)			312								LOC_Os07g47670.1	LOC_Os01g02390.1				LOC_Os07g48510.1	protein|thioredoxin, putative, expressed
LOC_Os10g28350.1		LOC_Os01g02390.2 (553)			203								LOC_Os07g47670.2	LOC_Os01g02390.2				LOC_Os07g48510.2	protein|thioredoxin, putative, expressed
LOC_Os10g30450.1		LOC_Os01g02550.1 (734)			141								LOC_Os07g48450.1	LOC_Os01g02550.1				LOC_Os07g48550.1	protein|no apical meristem protein, putative, expressed
LOC_Os10g31850.1		LOC_Os01g02810.1 (642)			314								LOC_Os07g48510.1	LOC_Os01g02810.1				LOC_Os08g05320.2	protein|expressed protein
LOC_Os10g31850.2		LOC_Os01g02900.1 (563)			223								LOC_Os07g48510.2	LOC_Os01g02900.1				LOC_Os08g05320.3	protein|expressed protein
LOC_Os10g31850.5		LOC_Os01g02900.2 (503)			199								LOC_Os07g48550.1	LOC_Os01g02900.2				LOC_Os08g07100.1	protein|terpene synthase, putative, expressed
LOC_Os10g33040.1		LOC_Os01g03870.1 (634)			310								LOC_Os08g05320.2	LOC_Os01g03870.1				LOC_Os08g10290.1	protein|SHR5-receptor-like kinase, putative, expressed
LOC_Os10g33080.1		LOC_Os01g04280.1 (439)			312								LOC_Os08g05320.3	LOC_Os01g04280.1				LOC_Os08g10310.1	protein|SHR5-receptor-like kinase, putative, expressed
LOC_Os10g33130.1		LOC_Os01g04530.1 (251)			14	K04965	1						LOC_Os08g07100.1	LOC_Os01g04530.1				LOC_Os08g10310.2	protein|SHR5-receptor-like kinase, putative, expressed
LOC_Os10g33210.1		LOC_Os01g04540.1 (296)			22								LOC_Os08g10290.1	LOC_Os01g04540.1				LOC_Os08g10320.1	protein|SHR5-receptor-like kinase, putative, expressed
LOC_Os10g34350.1		LOC_Os01g04550.1 (290)			133								LOC_Os08g10310.1	LOC_Os01g04550.1				LOC_Os08g10320.2	protein|SHR5-receptor-like kinase, putative, expressed
LOC_Os10g34910.1		LOC_Os01g06520.1 (1022)			429								LOC_Os08g10310.2	LOC_Os01g06520.1				LOC_Os08g10320.3	protein|SHR5-receptor-like kinase, putative, expressed
LOC_Os10g35460.1		LOC_Os01g06640.1 (259)			134								LOC_Os08g10310.3	LOC_Os01g06640.1				LOC_Os08g13440.1	protein|cupin domain containing protein, expressed
LOC_Os10g36480.1		LOC_Os01g06640.2 (259)			134								LOC_Os08g10320.1	LOC_Os01g06640.2				LOC_Os08g13440.2	protein|cupin domain containing protein, expressed
LOC_Os10g37340.1		LOC_Os01g06640.3 (163)			24	K22484	2						LOC_Os08g10320.2	LOC_Os01g06640.3				LOC_Os08g13440.3	protein|cupin domain containing protein, expressed
LOC_Os10g38360.1		LOC_Os01g07970.1 (139)			39								LOC_Os08g10320.3	LOC_Os01g07970.1				LOC_Os08g15710.1	protein|DC1 domain, putative, expressed
LOC_Os10g38489.1		LOC_Os01g09010.1 (420)			342								LOC_Os08g13440.1	LOC_Os01g09010.1				LOC_Os08g15780.1	protein|DC1 domain, putative, expressed
LOC_Os10g39100.1		LOC_Os01g09100.1 (220)			41								LOC_Os08g13440.2	LOC_Os01g09100.1				LOC_Os08g16050.1	protein|tetraspanin family protein, putative, expressed
LOC_Os10g39680.1		LOC_Os01g10990.1 (377)			274								LOC_Os08g13440.3	LOC_Os01g10990.1				LOC_Os08g24310.1	protein|receptor-like protein kinase precursor, putative, expressed
LOC_Os10g39700.1		LOC_Os01g11160.1 (617)			477								LOC_Os08g15710.1	LOC_Os01g11160.1				LOC_Os08g29020.1	protein|wall-associated kinase-like 2, putative, expressed
LOC_Os10g40640.1		LOC_Os01g12760.1 (540)			278								LOC_Os08g15780.1	LOC_Os01g12760.1				LOC_Os08g29570.1	protein|pleiotropic drug resistance protein 3, putative, expressed
LOC_Os10g40934.1		LOC_Os01g12770.1 (541)			395								LOC_Os08g16050.1	LOC_Os01g12770.1				LOC_Os08g30770.1	protein|ABC transporter, ATP-binding protein, putative, expressed
LOC_Os10g40934.10		LOC_Os01g14410.1 (203)			71								LOC_Os08g24310.1	LOC_Os01g14410.1				LOC_Os08g33350.1	protein|expressed protein
LOC_Os10g40934.11		LOC_Os01g15000.1 (708)			387								LOC_Os08g29020.1	LOC_Os01g15000.1				LOC_Os08g37670.1	protein|plastocyanin-like domain containing protein, putative, expressed
LOC_Os10g40934.12		LOC_Os01g15530.1 (504)			282								LOC_Os08g29570.1	LOC_Os01g15530.1				LOC_Os08g39660.1	protein|cytochrome P450, putative, expressed
LOC_Os10g40934.2		LOC_Os01g15540.1 (794)			169	K10405	90						LOC_Os08g30770.1	LOC_Os01g15540.1				LOC_Os08g39694.1	protein|cytochrome P450, putative, expressed
LOC_Os10g40934.3		LOC_Os01g18584.1 (604)			188								LOC_Os08g33350.1	LOC_Os01g18584.1				LOC_Os08g39694.2	protein|cytochrome P450, putative, expressed
LOC_Os10g40934.7		LOC_Os01g19820.1 (183)			102								LOC_Os08g37670.1	LOC_Os01g19820.1				LOC_Os08g39730.1	protein|cytochrome P450, putative, expressed
LOC_Os10g40934.9		LOC_Os01g19820.2 (183)			102								LOC_Os08g39660.1	LOC_Os01g19820.2				LOC_Os09g04160.1	protein|expressed protein
LOC_Os10g41330.1		LOC_Os01g19820.3 (183)			102								LOC_Os08g39694.1	LOC_Os01g19820.3				LOC_Os09g04160.2	protein|expressed protein
LOC_Os10g41330.2		LOC_Os01g19820.4 (183)			102								LOC_Os08g39694.2	LOC_Os01g19820.4				LOC_Os09g16950.1	protein|cysteine-rich receptor-like protein kinase 25 precursor, putative, expressed
LOC_Os10g41550.1		LOC_Os01g22900.1 (629)			479								LOC_Os08g39694.3	LOC_Os01g22900.1				LOC_Os09g18020.1	protein|senescence-induced receptor-like serine/threonine-protein kinase precursor, putative, expressed
LOC_Os10g43060.1		LOC_Os01g22900.2 (506)			287								LOC_Os08g39730.1	LOC_Os01g22900.2				LOC_Os09g18159.1	protein|light repressible receptor protein kinase, putative, expressed
LOC_Os11g03300.1		LOC_Os01g22900.3 (563)			315								LOC_Os09g04160.1	LOC_Os01g22900.3				LOC_Os09g18260.1	protein|senescence-induced receptor-like serine/threonine-protein kinase precursor, putative, expressed
LOC_Os11g03370.1		LOC_Os01g29330.1 (241)			141								LOC_Os09g04160.2	LOC_Os01g29330.1				LOC_Os09g18360.1	expressed protein
LOC_Os11g03820.1		LOC_Os01g38610.1 (467)			138								LOC_Os09g16950.1	LOC_Os01g38610.1				LOC_Os09g24580.1	EF hand family protein, putative, expressed
LOC_Os11g04560.1		LOC_Os01g39330.1 (455)			103								LOC_Os09g18020.1	LOC_Os01g39330.1				LOC_Os09g27010.1	tyrosine protein kinase domain containing protein, putative, expressed
LOC_Os11g05800.1		LOC_Os01g41240.1 (303)			143								LOC_Os09g18159.1	LOC_Os01g41240.1				LOC_Os09g28180.1	D-mannose binding lectin family protein, expressed
LOC_Os11g07120.1		LOC_Os01g42410.1 (1444)			1351								LOC_Os09g18260.1	LOC_Os01g42410.1				LOC_Os09g28210.1	bHelix-loop-helix transcription factor, putative, expressed
LOC_Os11g07120.2		LOC_Os01g42790.1 (360)			126								LOC_Os09g18360.1	LOC_Os01g42790.1				LOC_Os09g29540.1	OsWAK82 - OsWAK receptor-like cytoplasmic kinase OsWAK-RLCK, expressed
LOC_Os11g07200.1		LOC_Os01g42860.1 (73)			16								LOC_Os09g24580.1	LOC_Os01g42860.1				LOC_Os09g29560.1	OsWAK83 - OsWAK pseudogene, expressed
LOC_Os11g07200.2		LOC_Os01g43750.1 (529)			530								LOC_Os09g27010.1	LOC_Os01g43750.1				LOC_Os09g31200.1	AN1-like zinc finger domain containing protein, expressed
LOC_Os11g07440.1		LOC_Os01g43760.1 (472)			359								LOC_Os09g28180.1	LOC_Os01g43760.1				LOC_Os09g32330.1	expressed protein
LOC_Os11g07440.2		LOC_Os01g48000.1 (815)			483								LOC_Os09g28210.1	LOC_Os01g48000.1				LOC_Os09g35580.1	expressed protein
LOC_Os11g07440.3		LOC_Os01g48610.1 (766)			193								LOC_Os09g29540.1	LOC_Os01g48610.1				LOC_Os09g37330.1	OsSAUR39 - Auxin-responsive SAUR gene family member, expressed
LOC_Os11g07440.4		LOC_Os01g50910.1 (216)			18	K20254	1						LOC_Os09g29560.1	LOC_Os01g50910.1				LOC_Os09g39770.1	C2 domain containing protein, putative, expressed
LOC_Os11g07960.1		LOC_Os01g50910.2 (170)			15	K20254	1						LOC_Os09g31200.1	LOC_Os01g50910.2				LOC_Os10g03850.1	OsFBX352 - F-box domain containing protein, expressed
LOC_Os11g10120.1		LOC_Os01g51570.1 (339)			285								LOC_Os09g32330.1	LOC_Os01g51570.1				LOC_Os10g04490.1	expressed protein
LOC_Os11g11940.1		LOC_Os01g53090.1 (265)			194								LOC_Os09g35580.1	LOC_Os01g53090.1				LOC_Os10g05250.1	protein kinase domain containing protein, expressed
LOC_Os11g11960.1		LOC_Os01g53730.1 (176)			23	K17795	1						LOC_Os09g37330.1	LOC_Os01g53730.1				LOC_Os10g12050.2	expressed protein
LOC_Os11g12340.1		LOC_Os01g55290.1 (296)			191								LOC_Os09g39770.1	LOC_Os01g55290.1				LOC_Os10g17489.1	UDP-glucoronosyl and UDP-glucosyl transferase domain containing protein, expressed
LOC_Os11g12340.2		LOC_Os01g55290.2 (296)			191								LOC_Os10g03850.1	LOC_Os01g55290.2				LOC_Os10g21590.2	transporter family protein, putative, expressed
LOC_Os11g15040.1		LOC_Os01g55290.3 (214)			103								LOC_Os10g03850.2	LOC_Os01g55290.3				LOC_Os10g23050.1	helix-loop-helix DNA-binding protein, putative, expressed
LOC_Os11g15040.2		LOC_Os01g56450.1 (228)			117								LOC_Os10g03850.3	LOC_Os01g56450.1				LOC_Os10g25550.1	tyrosine protein kinase domain containing protein, putative, expressed
LOC_Os11g15040.3		LOC_Os01g59000.1 (516)			444								LOC_Os10g04490.1	LOC_Os01g59000.1				LOC_Os10g30450.1	heavy-metal-associated domain-containing protein, putative, expressed
LOC_Os11g15040.4		LOC_Os01g59840.1 (515)			266	K01188	68						LOC_Os10g05250.1	LOC_Os01g59840.1				LOC_Os10g33040.1	receptor-like protein kinase precursor, putative, expressed
LOC_Os11g15040.5		LOC_Os01g60020.1 (319)			252								LOC_Os10g12050.1	LOC_Os01g60020.1				LOC_Os10g33080.1	leucine-rich repeat receptor protein kinase EXS precursor, putative, expressed
LOC_Os11g17380.1		LOC_Os01g60860.1 (681)			386								LOC_Os10g12050.2	LOC_Os01g60860.1				LOC_Os10g33130.1	leucine-rich repeat receptor protein kinase EXS precursor, putative, expressed
LOC_Os11g29710.1		LOC_Os01g61230.1 (327)			227								LOC_Os10g17489.1	LOC_Os01g61230.1				LOC_Os10g33210.1	peptide transporter PTR3-A, putative, expressed
LOC_Os11g29870.1		LOC_Os01g61990.1 (557)			448								LOC_Os10g21590.1	LOC_Os01g61990.1				LOC_Os10g34350.1	aminotransferase, classes I and II, domain containing protein, expressed
LOC_Os11g31190.1		LOC_Os01g61990.2 (584)			436								LOC_Os10g21590.2	LOC_Os01g61990.2				LOC_Os10g34910.1	secretory protein, putative, expressed
LOC_Os11g31900.1		LOC_Os01g63690.1 (475)			437								LOC_Os10g23050.1	LOC_Os01g63690.1				LOC_Os10g35460.1	COBRA, putative, expressed
LOC_Os11g31900.2		LOC_Os01g69870.1 (132)			22	K14480	1						LOC_Os10g25550.1	LOC_Os01g69870.1				LOC_Os10g36480.1	expressed protein
LOC_Os11g31900.3		LOC_Os01g69870.2 (125)			20	K14480	1						LOC_Os10g30450.1	LOC_Os01g69870.2				LOC_Os10g39100.1	uncharacterized Cys-rich domain containing protein, putative, expressed
LOC_Os11g32500.1		LOC_Os01g71340.1 (331)			224								LOC_Os10g33040.1	LOC_Os01g71340.1				LOC_Os10g40640.1	glycosyl transferase 8 domain containing protein, putative, expressed
LOC_Os11g33970.1		LOC_Os01g71350.1 (333)			287								LOC_Os10g33080.1	LOC_Os01g71350.1				LOC_Os10g40934.1	flavonol synthase/flavanone 3-hydroxylase, putative, expressed
LOC_Os11g34920.1		LOC_Os01g73500.1 (206)			112								LOC_Os10g33130.1	LOC_Os01g73500.1				LOC_Os10g43060.1	expressed protein
LOC_Os11g36200.1		LOC_Os01g73500.2 (178)			68								LOC_Os10g33210.1	LOC_Os01g73500.2				LOC_Os11g03300.1	NAC domain transcription factor, putative, expressed
LOC_Os11g36200.2		LOC_Os02g04230.1 (507)			392								LOC_Os10g34350.1	LOC_Os02g04230.1				LOC_Os11g03370.1	no apical meristem protein, putative, expressed
LOC_Os11g37950.1		LOC_Os02g04230.2 (507)			392								LOC_Os10g34910.1	LOC_Os02g04230.2				LOC_Os11g03820.1	D-mannose binding lectin family protein, expressed
LOC_Os11g38870.1		LOC_Os02g04230.3 (507)			392								LOC_Os10g35460.1	LOC_Os02g04230.3				LOC_Os11g07120.1	receptor kinase-like protein, identical, putative, expressed
LOC_Os11g38870.2		LOC_Os02g05470.1 (483)			172								LOC_Os10g36480.1	LOC_Os02g05470.1				LOC_Os11g07200.2	receptor protein kinase CLAVATA1 precursor, putative, expressed
LOC_Os06g50040.1		LOC_Os02g05470.2 (472)			162								LOC_Os10g39100.1	LOC_Os02g05470.2				LOC_Os11g07440.3	plant neutral invertase domain containing protein, expressed
LOC_Os06g51060.1		LOC_Os02g10660.1 (425)			331								LOC_Os10g40640.1	LOC_Os02g10660.1				LOC_Os11g10120.1	expressed protein
LOC_Os07g03710.1		LOC_Os02g11980.1 (1132)			558								LOC_Os10g40934.1	LOC_Os02g11980.1				LOC_Os11g17380.1	protein kinase domain containing protein, expressed
LOC_Os07g03730.1		LOC_Os02g12010.1 (1045)			364	K13420	27						LOC_Os10g40934.10	LOC_Os02g12010.1				LOC_Os11g29710.1	OsFBO4 - F-box and other domain containing protein, expressed
LOC_Os07g03740.1		LOC_Os02g12030.1 (1133)			543								LOC_Os10g40934.11	LOC_Os02g12030.1				LOC_Os11g29870.1	WRKY72, expressed
LOC_Os07g04040.1		LOC_Os02g12040.1 (676)			77	K13420	37						LOC_Os10g40934.12	LOC_Os02g12040.1				LOC_Os11g31900.1	acyl carrier protein, putative, expressed
LOC_Os07g06800.1		LOC_Os02g16060.1 (844)			206								LOC_Os10g40934.2	LOC_Os02g16060.1				LOC_Os11g32500.1	rubredoxin family protein, putative, expressed
LOC_Os07g06850.1		LOC_Os02g16270.1 (1395)			373								LOC_Os10g40934.3	LOC_Os02g16270.1				LOC_Os11g33970.1	plant protein of unknown function domain containing protein, expressed
LOC_Os07g08150.1		LOC_Os02g16270.2 (1395)			373								LOC_Os10g40934.7	LOC_Os02g16270.2				LOC_Os11g36200.1	receptor-like protein kinase 2 precursor, putative, expressed
LOC_Os07g09010.1		LOC_Os02g18070.1 (968)			79								LOC_Os10g40934.9	LOC_Os02g18070.1				LOC_Os11g37950.1	WIP3 - Wound-induced protein precursor, expressed
LOC_Os07g09420.1		LOC_Os02g18080.1 (1186)			349								LOC_Os10g43060.1	LOC_Os02g18080.1				LOC_Os11g38870.1	helix-loop-helix DNA-binding domain containing protein, expressed
LOC_Os07g12640.1		LOC_Os02g32520.1 (939)			540	K03696	133						LOC_Os11g03300.1	LOC_Os02g32520.1				LOC_Os11g44960.1	NBS-LRR disease resistance protein, putative, expressed
LOC_Os07g14150.1		LOC_Os02g32520.2 (683)			383	K03696	70						LOC_Os11g03370.1	LOC_Os02g32520.2				LOC_Os11g44990.1	NB-ARC domain containing protein, expressed
LOC_Os07g14150.2		LOC_Os02g34790.1 (835)			327								LOC_Os11g03820.1	LOC_Os02g34790.1				LOC_Os11g45050.1	NBS-LRR disease resistance protein, putative, expressed
LOC_Os07g14150.3		LOC_Os02g35320.1 (419)			195								LOC_Os11g07120.1	LOC_Os02g35320.1				LOC_Os11g45130.1	pollen signalling protein with adenylyl cyclase activity, putative, expressed
LOC_Os07g14150.4		LOC_Os02g36619.1 (701)			73	K07195	53						LOC_Os11g07120.2	LOC_Os02g36619.1				LOC_Os11g45190.1	NB-ARC domain containing protein, expressed
LOC_Os07g14150.5		LOC_Os02g36940.1 (163)			135								LOC_Os11g07200.1	LOC_Os02g36940.1				LOC_Os11g47680.1	thaumatin family domain containing protein, expressed
LOC_Os07g14150.6		LOC_Os02g38040.1 (502)			287								LOC_Os11g07200.2	LOC_Os02g38040.1				LOC_Os12g01490.1	MYB family transcription factor, putative, expressed
LOC_Os07g14150.7		LOC_Os02g41840.1 (171)			65								LOC_Os11g07440.1	LOC_Os02g41840.1				LOC_Os12g03040.1	no apical meristem protein, putative, expressed
LOC_Os07g32590.1		LOC_Os02g42440.1 (233)			187								LOC_Os11g07440.2	LOC_Os02g42440.1				LOC_Os12g17160.1	flavonol sulfotransferase, putative, expressed
LOC_Os07g33580.1		LOC_Os02g44300.1 (238)			141								LOC_Os11g07440.3	LOC_Os02g44300.1				LOC_Os12g24020.1	rhodanese-like domain containing protein, putative, expressed
LOC_Os07g33610.1		LOC_Os02g44300.3 (137)			27								LOC_Os11g07440.4	LOC_Os02g44300.3				LOC_Os12g24320.1	ATPase 3, putative, expressed
LOC_Os07g33610.2		LOC_Os02g44880.1 (532)			20	K16483	1						LOC_Os11g10120.1	LOC_Os02g44880.1				LOC_Os12g26470.1	aspartic proteinase nepenthesin-1 precursor, putative, expressed
LOC_Os07g34520.1		LOC_Os02g44990.1 (378)			62								LOC_Os11g17380.1	LOC_Os02g44990.1				LOC_Os12g28550.1	ATPase, AAA family domain containing protein, expressed
LOC_Os07g34520.2		LOC_Os02g46850.1 (560)			372								LOC_Os11g29710.1	LOC_Os02g46850.1				LOC_Os12g29330.1	no apical meristem protein, putative, expressed
LOC_Os07g34520.3		LOC_Os02g46860.1 (246)			39								LOC_Os11g29870.1	LOC_Os02g46860.1				LOC_Os12g30180.1	protein kinase domain containing protein, expressed
LOC_Os07g34850.1		LOC_Os02g47840.1 (178)			240								LOC_Os11g31900.1	LOC_Os02g47840.1				LOC_Os12g32280.1	SWIB/MDM2 domain containing protein, expressed
LOC_Os07g35310.1		LOC_Os02g51890.1 (320)			111								LOC_Os11g31900.2	LOC_Os02g51890.1				LOC_Os12g36110.1	calmodulin binding protein, putative, expressed
LOC_Os07g35310.2		LOC_Os02g51890.2 (177)			29								LOC_Os11g31900.3	LOC_Os02g51890.2				LOC_Os12g36940.1	calmodulin binding protein, putative, expressed
LOC_Os07g35330.1		LOC_Os02g53750.1 (450)			341								LOC_Os11g32500.1	LOC_Os02g53750.1				LOC_Os12g38150.1	osmotin, putative, expressed
LOC_Os07g35340.1		LOC_Os02g53750.2 (247)			71								LOC_Os11g33970.1	LOC_Os02g53750.2				LOC_Os12g38170.1	osmotin, putative, expressed
LOC_Os07g35340.2		LOC_Os02g54360.1 (159)			66								LOC_Os11g36200.1	LOC_Os02g54360.1				LOC_Os12g41680.1	No apical meristem protein, putative, expressed
LOC_Os07g35340.3		LOC_Os02g54980.1 (540)			509								LOC_Os11g36200.2	LOC_Os02g54980.1				LOC_Os12g43410.1	thaumatin, putative, expressed
LOC_Os07g35370.1		LOC_Os02g55610.1 (174)			22	K11862	1						LOC_Os11g37950.1	LOC_Os02g55610.1				LOC_Os12g44050.1	purple acid phosphatase precursor, putative, expressed
LOC_Os07g35390.1		LOC_Os02g57560.1 (473)			216								LOC_Os11g38870.1	LOC_Os02g57560.1
LOC_Os07g35480.1		LOC_Os02g58120.1 (277)			254								LOC_Os11g38870.2	LOC_Os02g58120.1
LOC_Os07g35480.2		LOC_Os03g02550.1 (298)			227								LOC_Os11g44960.1	LOC_Os03g02550.1
LOC_Os07g35480.3		LOC_Os03g04020.1 (280)			171								LOC_Os11g44990.1	LOC_Os03g04020.1
LOC_Os07g35540.1		LOC_Os03g04020.2 (240)			151								LOC_Os11g45050.1	LOC_Os03g04020.2
LOC_Os07g35560.1		LOC_Os03g04470.1 (252)			147								LOC_Os11g45130.1	LOC_Os03g04470.1
LOC_Os07g35560.2		LOC_Os03g05900.1 (408)			290								LOC_Os11g45190.1	LOC_Os03g05900.1
LOC_Os07g35560.3		LOC_Os03g05900.2 (355)			173								LOC_Os11g47680.1	LOC_Os03g05900.2
LOC_Os07g35750.1		LOC_Os03g09900.1 (385)			240								LOC_Os12g01490.1	LOC_Os03g09900.1
LOC_Os07g35750.2		LOC_Os03g10620.1 (323)			199								LOC_Os12g03040.1	LOC_Os03g10620.1
LOC_Os07g35810.1		LOC_Os03g10620.2 (319)			205								LOC_Os12g17160.1	LOC_Os03g10620.2
LOC_Os07g36800.1		LOC_Os03g10620.3 (319)			205								LOC_Os12g24020.1	LOC_Os03g10620.3
LOC_Os07g36800.2		LOC_Os03g10950.1 (393)			124	K01102	123						LOC_Os12g24020.2	LOC_Os03g10950.1
LOC_Os07g37320.1		LOC_Os03g12470.1 (705)			428								LOC_Os12g24020.3	LOC_Os03g12470.1
LOC_Os07g38430.1		LOC_Os03g16350.1 (259)			152								LOC_Os12g24320.1	LOC_Os03g16350.1
LOC_Os07g40000.1		LOC_Os03g16390.1 (471)			207								LOC_Os12g26470.1	LOC_Os03g16390.1
LOC_Os07g41230.1		LOC_Os03g16950.1 (266)			197								LOC_Os12g28550.1	LOC_Os03g16950.1
LOC_Os07g42510.1		LOC_Os03g16960.1 (266)			138								LOC_Os12g29330.1	LOC_Os03g16960.1
LOC_Os07g43800.1		LOC_Os03g17790.1 (55)			40								LOC_Os12g30180.1	LOC_Os03g17790.1
LOC_Os07g43810.1		LOC_Os03g19010.1 (243)			203								LOC_Os12g32280.1	LOC_Os03g19010.1
LOC_Os07g46030.1		LOC_Os03g19700.1 (421)			150								LOC_Os12g36110.1	LOC_Os03g19700.1
LOC_Os07g46060.1		LOC_Os03g19990.1 (731)			353								LOC_Os12g36940.1	LOC_Os03g19990.1
LOC_Os07g46852.1		LOC_Os03g20840.1 (1074)			390	K15078	25						LOC_Os12g38150.1	LOC_Os03g20840.1
LOC_Os07g46852.2		LOC_Os03g21230.1 (976)			765								LOC_Os12g38170.1	LOC_Os03g21230.1
LOC_Os07g46852.3		LOC_Os03g22790.1 (525)			327								LOC_Os12g41680.1	LOC_Os03g22790.1
LOC_Os07g46852.4		LOC_Os03g24730.1 (853)			433								LOC_Os12g43410.1	LOC_Os03g24730.1
LOC_Os07g47670.1		LOC_Os11g44960.1 (1034)			406								LOC_Os12g44050.1	LOC_Os11g44960.1
LOC_Os07g47670.2		LOC_Os11g44990.1 (977)			131									LOC_Os11g44990.1
LOC_Os07g47990.1		LOC_Os11g45050.1 (1034)			404									LOC_Os11g45050.1
LOC_Os07g47990.2		LOC_Os11g45130.1 (930)			225									LOC_Os11g45130.1
LOC_Os07g48020.1		LOC_Os11g45190.1 (1033)			387									LOC_Os11g45190.1
LOC_Os07g48450.1		LOC_Os11g47680.1 (207)			73									LOC_Os11g47680.1
LOC_Os07g48510.1		LOC_Os12g01490.1 (315)			55									LOC_Os12g01490.1
LOC_Os07g48510.2		LOC_Os12g03040.1 (394)			220									LOC_Os12g03040.1
LOC_Os07g48550.1		LOC_Os12g17160.1 (339)			80	K22312	32							LOC_Os12g17160.1
LOC_Os08g02230.1		LOC_Os12g24020.1 (151)			11	K22547	5							LOC_Os12g24020.1
LOC_Os08g02640.1		LOC_Os12g24020.2 (141)			18	K22547	6							LOC_Os12g24020.2
LOC_Os08g02640.2		LOC_Os12g24020.3 (104)			6	K22547	5							LOC_Os12g24020.3
LOC_Os08g02640.3		LOC_Os12g24320.1 (524)			322									LOC_Os12g24320.1
LOC_Os08g02640.4		LOC_Os12g26470.1 (410)			74									LOC_Os12g26470.1
LOC_Os08g02640.5		LOC_Os12g28550.1 (474)			172	K08900	15							LOC_Os12g28550.1
LOC_Os08g02700.1		LOC_Os12g29330.1 (261)			154									LOC_Os12g29330.1
LOC_Os08g05320.2		LOC_Os12g30180.1 (479)			55									LOC_Os12g30180.1
LOC_Os08g05320.3		LOC_Os12g32280.1 (159)			75									LOC_Os12g32280.1
LOC_Os08g07100.1		LOC_Os12g36110.1 (674)			214									LOC_Os12g36110.1
LOC_Os08g09200.1		LOC_Os12g36940.1 (672)			189									LOC_Os12g36940.1
LOC_Os08g10290.1		LOC_Os12g38150.1 (234)			113									LOC_Os12g38150.1
LOC_Os08g10310.1		LOC_Os12g38170.1 (234)			103									LOC_Os12g38170.1
LOC_Os08g10310.2		LOC_Os12g41680.1 (334)			250									LOC_Os12g41680.1
LOC_Os08g10310.3		LOC_Os12g43410.1 (151)			32									LOC_Os12g43410.1
LOC_Os08g10320.1		LOC_Os12g44050.1 (136)												LOC_Os12g44050.1
LOC_Os08g10320.2		LOC_Os09g18260.1 (853)			346									LOC_Os09g18260.1
LOC_Os08g10320.3		LOC_Os09g18360.1 (882)			404									LOC_Os09g18360.1
LOC_Os08g13440.1		LOC_Os09g24580.1 (162)												LOC_Os09g24580.1
LOC_Os08g13440.2		LOC_Os09g27010.1 (459)			363									LOC_Os09g27010.1
LOC_Os08g13440.3		LOC_Os09g28180.1 (899)			492									LOC_Os09g28180.1
LOC_Os08g15270.1		LOC_Os09g28210.1 (237)			110									LOC_Os09g28210.1
LOC_Os08g15306.1		LOC_Os09g29540.1 (255)			52									LOC_Os09g29540.1
LOC_Os08g15710.1		LOC_Os09g29560.1 (707)			311									LOC_Os09g29560.1
LOC_Os08g15780.1		LOC_Os09g31200.1 (165)			83									LOC_Os09g31200.1
LOC_Os08g16050.1		LOC_Os09g32330.1 (260)			51									LOC_Os09g32330.1
LOC_Os08g24310.1		LOC_Os09g35580.1 (132)			10	K18160	1							LOC_Os09g35580.1
LOC_Os08g29020.1		LOC_Os09g37330.1 (172)			68									LOC_Os09g37330.1
LOC_Os08g29570.1		LOC_Os09g39770.1 (291)			185									LOC_Os09g39770.1
LOC_Os08g30770.1		LOC_Os10g03850.1 (425)			119									LOC_Os10g03850.1
LOC_Os08g33350.1		LOC_Os10g03850.2 (364)			56									LOC_Os10g03850.2
LOC_Os08g33440.1		LOC_Os10g03850.3 (332)			36									LOC_Os10g03850.3
LOC_Os08g34150.1		LOC_Os10g04490.1 (487)			23									LOC_Os10g04490.1
LOC_Os08g37670.1		LOC_Os10g05250.1 (651)			135	K13416	11							LOC_Os10g05250.1
LOC_Os08g38710.1		LOC_Os10g12050.1 (216)												LOC_Os10g12050.1
LOC_Os08g39600.1		LOC_Os10g12050.2 (216)												LOC_Os10g12050.2
LOC_Os08g39660.1		LOC_Os10g17489.1 (486)			331									LOC_Os10g17489.1
LOC_Os08g39694.1		LOC_Os10g21590.1 (507)			349									LOC_Os10g21590.1
LOC_Os08g39694.2		LOC_Os10g21590.2 (507)			349									LOC_Os10g21590.2
LOC_Os08g39694.3		LOC_Os10g23050.1 (329)			159									LOC_Os10g23050.1
LOC_Os08g39730.1		LOC_Os10g25550.1 (390)			339									LOC_Os10g25550.1
LOC_Os08g39840.1		LOC_Os10g30450.1 (360)			121									LOC_Os10g30450.1
LOC_Os08g40430.1		LOC_Os10g33040.1 (1214)			801									LOC_Os10g33040.1
LOC_Os08g40680.1		LOC_Os10g33080.1 (1152)			393									LOC_Os10g33080.1
LOC_Os08g40690.1		LOC_Os10g33130.1 (1049)			361									LOC_Os10g33130.1
LOC_Os08g41990.1		LOC_Os10g33210.1 (611)			615									LOC_Os10g33210.1
LOC_Os08g42910.1		LOC_Os10g34350.1 (413)			364									LOC_Os10g34350.1
LOC_Os08g43550.1		LOC_Os10g34910.1 (234)			144									LOC_Os10g34910.1
LOC_Os09g04160.1		LOC_Os10g35460.1 (426)			457									LOC_Os10g35460.1
LOC_Os09g04160.2		LOC_Os10g36480.1 (172)			147									LOC_Os10g36480.1
LOC_Os09g10760.1		LOC_Os10g39100.1 (217)			244									LOC_Os10g39100.1
LOC_Os09g11460.1		LOC_Os10g40640.1 (493)			410									LOC_Os10g40640.1
LOC_Os09g11460.2		LOC_Os10g40934.1 (363)			227									LOC_Os10g40934.1
LOC_Os09g11480.1		LOC_Os10g40934.10 (355)			233									LOC_Os10g40934.10
LOC_Os09g11480.2		LOC_Os10g40934.11 (358)			251									LOC_Os10g40934.11
LOC_Os09g15050.1		LOC_Os10g40934.12 (355)			233									LOC_Os10g40934.12
LOC_Os09g16950.1		LOC_Os10g40934.2 (355)			233									LOC_Os10g40934.2
LOC_Os09g17560.1		LOC_Os10g40934.3 (358)			251									LOC_Os10g40934.3
LOC_Os09g17810.1		LOC_Os10g40934.7 (280)			144									LOC_Os10g40934.7
LOC_Os09g18020.1		LOC_Os10g40934.9 (195)			62									LOC_Os10g40934.9
LOC_Os09g18159.1		LOC_Os10g43060.1 (353)			194									LOC_Os10g43060.1
LOC_Os04g52670.1		LOC_Os11g03300.1 (392)			183									LOC_Os11g03300.1
LOC_Os04g52810.1		LOC_Os11g03370.1 (360)			151									LOC_Os11g03370.1
LOC_Os04g53120.1		LOC_Os11g03820.1 (1268)			206									LOC_Os11g03820.1
LOC_Os04g53850.1		LOC_Os11g07120.1 (960)			400									LOC_Os11g07120.1
LOC_Os04g54080.1		LOC_Os11g07120.2 (960)			400									LOC_Os11g07120.2
LOC_Os04g54310.1		LOC_Os11g07200.1 (1025)			437									LOC_Os11g07200.1
LOC_Os04g56910.1		LOC_Os11g07200.2 (1025)			437									LOC_Os11g07200.2
LOC_Os04g58280.1		LOC_Os11g07440.1 (549)			503									LOC_Os11g07440.1
LOC_Os04g58280.2		LOC_Os11g07440.2 (452)			325									LOC_Os11g07440.2
LOC_Os04g59150.1		LOC_Os11g07440.3 (549)			503									LOC_Os11g07440.3
LOC_Os04g59150.2		LOC_Os11g07440.4 (452)			325									LOC_Os11g07440.4
LOC_Os04g59190.1		LOC_Os11g10120.1 (269)			11									LOC_Os11g10120.1
LOC_Os04g59200.1		LOC_Os11g17380.1 (694)			32									LOC_Os11g17380.1
LOC_Os04g59480.1		LOC_Os11g29710.1 (359)			171									LOC_Os11g29710.1
LOC_Os05g04584.1		LOC_Os11g29870.1 (243)			103									LOC_Os11g29870.1
LOC_Os05g05680.1		LOC_Os11g31900.1 (149)			68									LOC_Os11g31900.1
LOC_Os05g07940.1		LOC_Os11g31900.2 (115)			33									LOC_Os11g31900.2
LOC_Os05g07940.2		LOC_Os11g31900.3 (113)			60									LOC_Os11g31900.3
LOC_Os05g07940.3		LOC_Os11g32500.1 (152)			79									LOC_Os11g32500.1
LOC_Os05g07940.4		LOC_Os11g33970.1 (472)			263									LOC_Os11g33970.1
LOC_Os05g07940.5		LOC_Os11g36200.1 (535)			168									LOC_Os11g36200.1
LOC_Os05g08420.1		LOC_Os11g36200.2 (530)			167									LOC_Os11g36200.2
LOC_Os05g08620.1		LOC_Os11g37950.1 (151)			132									LOC_Os11g37950.1
LOC_Os05g08750.1		LOC_Os11g38870.1 (279)			56									LOC_Os11g38870.1
LOC_Os05g09020.1		LOC_Os11g38870.2 (269)			56									LOC_Os11g38870.2
LOC_Os05g09020.2		LOC_Os07g03740.1 (366)			10	K13449	7							LOC_Os07g03740.1
LOC_Os05g09500.1		LOC_Os07g04040.1 (671)			404									LOC_Os07g04040.1
LOC_Os05g15770.1		LOC_Os07g06800.1 (278)			165									LOC_Os07g06800.1
LOC_Os05g17604.1		LOC_Os07g06850.1 (336)			181									LOC_Os07g06850.1
LOC_Os05g17604.2		LOC_Os07g08150.1 (201)			134									LOC_Os07g08150.1
LOC_Os05g17604.3		LOC_Os07g09010.1 (625)			408									LOC_Os07g09010.1
LOC_Os05g17604.4		LOC_Os07g09420.1 (517)			303									LOC_Os07g09420.1
LOC_Os05g17604.5		LOC_Os07g14150.1 (203)			164									LOC_Os07g14150.1
LOC_Os05g17604.6		LOC_Os07g14150.2 (187)			195									LOC_Os07g14150.2
LOC_Os05g19910.1		LOC_Os07g14150.3 (153)			31									LOC_Os07g14150.3
LOC_Os05g25390.1		LOC_Os07g14150.4 (134)			80									LOC_Os07g14150.4
LOC_Os05g25770.1		LOC_Os07g14150.5 (117)			76									LOC_Os07g14150.5
LOC_Os05g26040.1		LOC_Os07g14150.6 (117)			76									LOC_Os07g14150.6
LOC_Os05g27660.1		LOC_Os07g14150.7 (153)			31									LOC_Os07g14150.7
LOC_Os05g27780.1		LOC_Os07g33580.1 (476)			393									LOC_Os07g33580.1
LOC_Os05g28740.1		LOC_Os07g33610.1 (437)			337									LOC_Os07g33610.1
LOC_Os05g30010.1		LOC_Os07g33610.2 (364)			256									LOC_Os07g33610.2
LOC_Os05g31160.1		LOC_Os07g34850.1 (437)			199									LOC_Os07g34850.1
LOC_Os05g31160.2		LOC_Os07g35310.1 (671)			379									LOC_Os07g35310.1
LOC_Os05g34854.1		LOC_Os07g35310.2 (519)			228									LOC_Os07g35310.2
LOC_Os05g34854.2		LOC_Os07g35330.1 (678)			336									LOC_Os07g35330.1
LOC_Os05g35290.1		LOC_Os07g35340.1 (679)			320									LOC_Os07g35340.1
LOC_Os05g35650.1		LOC_Os07g35340.2 (519)			181									LOC_Os07g35340.2
LOC_Os05g35650.2		LOC_Os07g35340.3 (437)			169									LOC_Os07g35340.3
LOC_Os05g37520.1		LOC_Os07g35370.1 (700)			339									LOC_Os07g35370.1
LOC_Os05g37520.2		LOC_Os07g35390.1 (639)			323									LOC_Os07g35390.1
LOC_Os05g39260.1		LOC_Os07g35480.1 (554)			197									LOC_Os07g35480.1
LOC_Os05g39720.1		LOC_Os07g35480.2 (554)			197									LOC_Os07g35480.2
LOC_Os05g43390.1		LOC_Os07g35480.3 (554)			197									LOC_Os07g35480.3
LOC_Os05g44100.1		LOC_Os07g35540.1 (686)			316									LOC_Os07g35540.1
LOC_Os05g45020.1		LOC_Os07g35560.1 (603)			195									LOC_Os07g35560.1
LOC_Os05g46020.1		LOC_Os07g35560.2 (559)			192									LOC_Os07g35560.2
LOC_Os05g46460.1		LOC_Os07g35560.3 (505)			179									LOC_Os07g35560.3
LOC_Os05g46460.3		LOC_Os07g35750.1 (658)			328									LOC_Os07g35750.1
LOC_Os05g46460.4		LOC_Os07g35750.2 (517)			199									LOC_Os07g35750.2
LOC_Os05g46460.5		LOC_Os07g35810.1 (612)			298									LOC_Os07g35810.1
LOC_Os05g46460.6		LOC_Os07g40000.1 (227)			153									LOC_Os07g40000.1
LOC_Os05g47660.1		LOC_Os07g41230.1 (385)			255									LOC_Os07g41230.1
LOC_Os05g47750.1		LOC_Os07g43800.1 (214)												LOC_Os07g43800.1
LOC_Os05g48340.1		LOC_Os07g46030.1 (971)			261									LOC_Os07g46030.1
LOC_Os05g48340.2		LOC_Os07g46060.1 (1123)			143									LOC_Os07g46060.1
LOC_Os05g48340.3		LOC_Os07g46852.1 (271)			146									LOC_Os07g46852.1
LOC_Os05g50090.1		LOC_Os07g46852.2 (269)			141									LOC_Os07g46852.2
LOC_Os05g50190.1		LOC_Os07g46852.3 (96)			12	K15090	1							LOC_Os07g46852.3
LOC_Os05g50380.1		LOC_Os07g46852.4 (94)			11	K21837	1							LOC_Os07g46852.4
LOC_Os05g50380.2		LOC_Os07g47670.1 (102)			78									LOC_Os07g47670.1
LOC_Os06g02019.1		LOC_Os07g47670.2 (102)			78									LOC_Os07g47670.2
LOC_Os06g02540.1		LOC_Os07g48450.1 (347)			211									LOC_Os07g48450.1
LOC_Os06g02540.2		LOC_Os07g48510.1 (280)			153									LOC_Os07g48510.1
LOC_Os06g03830.1		LOC_Os07g48510.2 (212)			69									LOC_Os07g48510.2
LOC_Os06g03830.2		LOC_Os07g48550.1 (302)			165									LOC_Os07g48550.1
LOC_Os06g04150.1		LOC_Os08g05320.2 (143)												LOC_Os08g05320.2
LOC_Os06g07030.1		LOC_Os08g05320.3 (143)												LOC_Os08g05320.3
LOC_Os06g07200.1		LOC_Os08g07100.1 (463)												LOC_Os08g07100.1
LOC_Os06g07600.1		LOC_Os08g10290.1 (996)			668									LOC_Os08g10290.1
LOC_Os06g09260.1		LOC_Os08g10310.1 (1025)			683									LOC_Os08g10310.1
LOC_Os06g09679.1		LOC_Os08g10310.2 (852)			477									LOC_Os08g10310.2
LOC_Os06g09679.2		LOC_Os08g10310.3 (672)			276									LOC_Os08g10310.3
LOC_Os06g09679.3		LOC_Os08g10320.1 (1016)			669									LOC_Os08g10320.1
LOC_Os06g13560.1		LOC_Os08g10320.2 (1000)			547									LOC_Os08g10320.2
LOC_Os06g13560.2		LOC_Os08g10320.3 (963)			620									LOC_Os08g10320.3
LOC_Os06g13560.3		LOC_Os08g13440.1 (227)			178									LOC_Os08g13440.1
LOC_Os06g13560.4		LOC_Os08g13440.2 (225)			181									LOC_Os08g13440.2
LOC_Os06g13560.5		LOC_Os08g13440.3 (203)			150									LOC_Os08g13440.3
LOC_Os06g15330.1		LOC_Os08g15710.1 (260)			63									LOC_Os08g15710.1
LOC_Os06g15370.1		LOC_Os08g15780.1 (233)			67									LOC_Os08g15780.1
LOC_Os06g19070.1		LOC_Os08g16050.1 (274)			189									LOC_Os08g16050.1
LOC_Os06g19370.1		LOC_Os08g24310.1 (1000)			453									LOC_Os08g24310.1
LOC_Os06g19370.2		LOC_Os08g29020.1 (371)			29									LOC_Os08g29020.1
LOC_Os06g19590.1		LOC_Os08g29570.1 (792)			416									LOC_Os08g29570.1
LOC_Os06g20150.1		LOC_Os08g30770.1 (958)			724									LOC_Os08g30770.1
LOC_Os06g20200.1		LOC_Os08g33350.1 (307)			5	K11294	5							LOC_Os08g33350.1
LOC_Os06g20960.1		LOC_Os08g37670.1 (182)			63									LOC_Os08g37670.1
LOC_Os06g22919.1		LOC_Os08g39660.1 (506)			270	K20556	38							LOC_Os08g39660.1
LOC_Os06g22919.2		LOC_Os08g39694.1 (464)			240	K20556	32							LOC_Os08g39694.1
LOC_Os06g22919.3		LOC_Os08g39694.2 (464)			240	K20556	32							LOC_Os08g39694.2
LOC_Os06g22919.4		LOC_Os08g39694.3 (428)			8	K20617	1							LOC_Os08g39694.3
LOC_Os06g24990.1		LOC_Os08g39730.1 (507)			315	K20556	27							LOC_Os08g39730.1
LOC_Os06g25010.1		LOC_Os09g04160.1 (527)			199									LOC_Os09g04160.1
LOC_Os06g35520.1		LOC_Os09g04160.2 (487)			274									LOC_Os09g04160.2
LOC_Os06g36560.1		LOC_Os09g16950.1 (517)			175									LOC_Os09g16950.1
LOC_Os06g36560.2		LOC_Os09g18020.1 (864)			394									LOC_Os09g18020.1
LOC_Os06g38830.1		LOC_Os09g18159.1 (676)			243									LOC_Os09g18159.1
LOC_Os06g39712.1		LOC_Os04g52670.1 (253)												LOC_Os04g52670.1
LOC_Os06g39750.1		LOC_Os04g52810.1 (284)			71									LOC_Os04g52810.1
LOC_Os06g39750.2		LOC_Os04g53120.1 (1886)			344									LOC_Os04g53120.1
LOC_Os06g39750.3		LOC_Os04g54080.1 (833)			352									LOC_Os04g54080.1
LOC_Os06g41020.1		LOC_Os04g54310.1 (215)			7	K22538	1							LOC_Os04g54310.1
LOC_Os06g44170.1		LOC_Os04g58280.1 (155)			65									LOC_Os04g58280.1
LOC_Os06g44170.2		LOC_Os04g58280.2 (259)			226									LOC_Os04g58280.2
LOC_Os06g45140.1		LOC_Os05g04584.1 (437)			387									LOC_Os05g04584.1
LOC_Os06g45140.2		LOC_Os05g07940.1 (209)			139									LOC_Os05g07940.1
LOC_Os06g45140.3		LOC_Os05g07940.2 (177)			64									LOC_Os05g07940.2
LOC_Os06g46340.1		LOC_Os05g07940.3 (124)			35	K08234	1							LOC_Os05g07940.3
LOC_Os06g46950.1		LOC_Os05g07940.4 (107)			6	K08234	1							LOC_Os05g07940.4
LOC_Os06g48250.1		LOC_Os05g07940.5 (137)			53									LOC_Os05g07940.5
LOC_Os06g48300.1		LOC_Os05g08420.1 (119)			24	K04097	1							LOC_Os05g08420.1
LOC_Os06g49250.1		LOC_Os05g08620.1 (95)			14	K12838	1							LOC_Os05g08620.1
LOC_Os06g49250.2		LOC_Os05g08750.1 (528)			222	K21371	6							LOC_Os05g08750.1
LOC_Os06g49250.3		LOC_Os05g09020.1 (195)			37									LOC_Os05g09020.1
LOC_Os06g49250.4		LOC_Os05g09020.2 (128)			35									LOC_Os05g09020.2
LOC_Os06g49250.5		LOC_Os05g17604.1 (1018)			659									LOC_Os05g17604.1
LOC_Os06g49390.1		LOC_Os05g17604.2 (886)			402									LOC_Os05g17604.2
LOC_Os03g29190.1		LOC_Os05g17604.3 (870)			525									LOC_Os05g17604.3
LOC_Os03g29190.2		LOC_Os05g17604.4 (688)			218									LOC_Os05g17604.4
LOC_Os03g29410.1		LOC_Os05g17604.5 (622)			156									LOC_Os05g17604.5
LOC_Os03g29540.1		LOC_Os05g17604.6 (622)			156									LOC_Os05g17604.6
LOC_Os03g29540.2		LOC_Os05g19910.1 (433)			392									LOC_Os05g19910.1
LOC_Os03g29540.3		LOC_Os05g25390.1 (655)			448									LOC_Os05g25390.1
LOC_Os03g31150.1		LOC_Os05g25770.1 (327)			63									LOC_Os05g25770.1
LOC_Os03g31150.2		LOC_Os05g26040.1 (1399)			22									LOC_Os05g26040.1
LOC_Os03g31150.3		LOC_Os05g27660.1 (104)			63									LOC_Os05g27660.1
LOC_Os03g31750.1		LOC_Os05g27780.1 (174)			51									LOC_Os05g27780.1
LOC_Os03g31750.2		LOC_Os05g28740.1 (180)			119									LOC_Os05g28740.1
LOC_Os03g31750.3		LOC_Os05g30010.1 (1295)			763									LOC_Os05g30010.1
LOC_Os03g40194.1		LOC_Os05g31160.1 (416)			225									LOC_Os05g31160.1
LOC_Os03g45390.1		LOC_Os05g31160.2 (271)			76									LOC_Os05g31160.2
LOC_Os03g45400.1		LOC_Os05g37520.1 (485)			187									LOC_Os05g37520.1
LOC_Os03g46070.1		LOC_Os05g37520.2 (487)			180									LOC_Os05g37520.2
LOC_Os03g46200.1		LOC_Os05g39260.1 (195)			58									LOC_Os05g39260.1
LOC_Os03g49350.1		LOC_Os05g45020.1 (256)			65									LOC_Os05g45020.1
LOC_Os03g49440.1		LOC_Os05g46020.1 (222)			56									LOC_Os05g46020.1
LOC_Os03g49440.2		LOC_Os05g46460.1 (401)			324									LOC_Os05g46460.1
LOC_Os03g55010.1		LOC_Os05g46460.3 (378)			254									LOC_Os05g46460.3
LOC_Os03g55070.1		LOC_Os05g46460.4 (359)			266									LOC_Os05g46460.4
LOC_Os03g55070.2		LOC_Os05g46460.5 (314)			214									LOC_Os05g46460.5
LOC_Os03g55164.1		LOC_Os05g46460.6 (314)			214									LOC_Os05g46460.6
LOC_Os03g55164.2		LOC_Os05g47750.1 (432)			120									LOC_Os05g47750.1
LOC_Os03g55720.1		LOC_Os05g50090.1 (385)			126									LOC_Os05g50090.1
LOC_Os03g55720.2		LOC_Os05g50190.1 (382)			333									LOC_Os05g50190.1
LOC_Os03g55970.1		LOC_Os06g02540.1 (372)			277									LOC_Os06g02540.1
LOC_Os03g55980.1		LOC_Os06g02540.2 (371)			275									LOC_Os06g02540.2
LOC_Os03g55990.1		LOC_Os06g03830.1 (354)			229									LOC_Os06g03830.1
LOC_Os03g55990.2		LOC_Os06g03830.2 (276)			158									LOC_Os06g03830.2
LOC_Os03g55990.3		LOC_Os06g09260.1 (145)												LOC_Os06g09260.1
LOC_Os03g56250.1		LOC_Os06g13560.1 (375)												LOC_Os06g13560.1
LOC_Os03g57310.1		LOC_Os06g13560.2 (373)												LOC_Os06g13560.2
LOC_Os03g57680.1		LOC_Os06g13560.3 (331)												LOC_Os06g13560.3
LOC_Os03g58790.1		LOC_Os06g13560.4 (311)												LOC_Os06g13560.4
LOC_Os03g58980.1		LOC_Os06g15330.1 (449)			207									LOC_Os06g15330.1
LOC_Os03g60080.1		LOC_Os06g19070.1 (519)			272									LOC_Os06g19070.1
LOC_Os03g60100.1		LOC_Os06g19370.1 (1117)			154									LOC_Os06g19370.1
LOC_Os03g60260.1		LOC_Os06g19370.2 (1070)			149									LOC_Os06g19370.2
LOC_Os03g61150.2		LOC_Os06g20200.1 (361)			187									LOC_Os06g20200.1
LOC_Os03g61150.3		LOC_Os06g24990.1 (97)												LOC_Os06g24990.1
LOC_Os03g61260.1		LOC_Os06g38830.1 (838)			292	K13420	15							LOC_Os06g38830.1
LOC_Os03g61260.3		LOC_Os06g44170.1 (364)			179									LOC_Os06g44170.1
LOC_Os03g61260.4		LOC_Os06g44170.2 (270)			28	K13082	4							LOC_Os06g44170.2
LOC_Os03g62690.1		LOC_Os06g45140.1 (296)			65									LOC_Os06g45140.1
LOC_Os03g62690.2		LOC_Os06g45140.2 (231)			26									LOC_Os06g45140.2
LOC_Os03g63310.1		LOC_Os06g45140.3 (221)			35									LOC_Os06g45140.3
LOC_Os03g63700.1		LOC_Os06g48250.1 (505)			160	K08900	46							LOC_Os06g48250.1
LOC_Os03g63900.1		LOC_Os06g49390.1 (1479)			347									LOC_Os06g49390.1
LOC_Os04g12960.1		LOC_Os03g29410.1 (501)			309									LOC_Os03g29410.1
LOC_Os04g16820.1		LOC_Os03g29540.1 (306)			118									LOC_Os03g29540.1
LOC_Os04g16830.1		LOC_Os03g29540.2 (306)			118									LOC_Os03g29540.2
LOC_Os04g21790.1		LOC_Os03g29540.3 (306)			118									LOC_Os03g29540.3
LOC_Os04g21820.1		LOC_Os03g31150.1 (641)			395									LOC_Os03g31150.1
LOC_Os04g22120.1		LOC_Os03g31150.2 (641)			395									LOC_Os03g31150.2
LOC_Os04g24220.1		LOC_Os03g31150.3 (641)			395									LOC_Os03g31150.3
LOC_Os04g24220.2		LOC_Os03g40194.1 (842)			236	K15078	14							LOC_Os03g40194.1
LOC_Os04g24220.3		LOC_Os03g45390.1 (493)			398									LOC_Os03g45390.1
LOC_Os04g24290.1		LOC_Os03g45400.1 (288)			209									LOC_Os03g45400.1
LOC_Os04g29770.1		LOC_Os03g46070.1 (230)			171									LOC_Os03g46070.1
LOC_Os04g29790.1		LOC_Os03g46200.1 (204)			84									LOC_Os03g46200.1
LOC_Os04g29810.1		LOC_Os03g55010.1 (463)			396									LOC_Os03g55010.1
LOC_Os04g30030.1		LOC_Os03g55164.1 (1003)			35									LOC_Os03g55164.1
LOC_Os04g30060.1		LOC_Os03g55164.2 (440)			105	K13424	5							LOC_Os03g55164.2
LOC_Os04g30110.1		LOC_Os03g55720.1 (119)			81									LOC_Os03g55720.1
LOC_Os04g30160.1		LOC_Os03g55720.2 (119)			81									LOC_Os03g55720.2
LOC_Os04g30240.1		LOC_Os03g55980.1 (156)			51									LOC_Os03g55980.1
LOC_Os04g30250.1		LOC_Os03g55990.1 (243)			9	K09338	3							LOC_Os03g55990.1
LOC_Os04g30250.2		LOC_Os03g55990.2 (227)			11	K09338	3							LOC_Os03g55990.2
LOC_Os04g30250.3		LOC_Os03g55990.3 (218)			9	K09338	3							LOC_Os03g55990.3
LOC_Os04g30330.1		LOC_Os03g56250.1 (761)			340									LOC_Os03g56250.1
LOC_Os04g30340.1		LOC_Os03g58790.1 (521)			298									LOC_Os03g58790.1
LOC_Os04g32110.1		LOC_Os03g58980.1 (234)			143									LOC_Os03g58980.1
LOC_Os04g32740.1		LOC_Os03g60080.1 (317)			242									LOC_Os03g60080.1
LOC_Os04g32920.1		LOC_Os03g61150.2 (144)			61									LOC_Os03g61150.2
LOC_Os04g32920.2		LOC_Os03g61150.3 (110)			10	K04139	1							LOC_Os03g61150.3
LOC_Os04g32920.3		LOC_Os03g62690.1 (1254)			133									LOC_Os03g62690.1
LOC_Os04g32920.4		LOC_Os03g62690.2 (703)			346									LOC_Os03g62690.2
LOC_Os04g32920.5		LOC_Os03g63310.1 (528)			237	K13029	106							LOC_Os03g63310.1
LOC_Os04g33240.1		LOC_Os03g63900.1 (363)			252									LOC_Os03g63900.1
LOC_Os04g33610.1		LOC_Os04g16830.1 (599)												LOC_Os04g16830.1
LOC_Os04g34360.1		LOC_Os04g21790.1 (886)			68									LOC_Os04g21790.1
LOC_Os04g35130.1		LOC_Os04g21820.1 (490)			150									LOC_Os04g21820.1
LOC_Os04g35540.1		LOC_Os04g22120.1 (747)			327									LOC_Os04g22120.1
LOC_Os04g36800.1		LOC_Os04g24220.1 (815)			239									LOC_Os04g24220.1
LOC_Os04g36800.2		LOC_Os04g24220.2 (625)			213									LOC_Os04g24220.2
LOC_Os04g37740.1		LOC_Os04g24220.3 (532)			153									LOC_Os04g24220.3
LOC_Os04g37790.1		LOC_Os04g24290.1 (537)			145									LOC_Os04g24290.1
LOC_Os04g37790.2		LOC_Os04g29770.1 (389)			124									LOC_Os04g29770.1
LOC_Os04g38530.1		LOC_Os04g29790.1 (261)			6									LOC_Os04g29790.1
LOC_Os04g38680.1		LOC_Os04g29810.1 (207)			7									LOC_Os04g29810.1
LOC_Os04g39300.1		LOC_Os04g30030.1 (464)			119									LOC_Os04g30030.1
LOC_Os04g39320.2		LOC_Os04g30060.1 (346)			75									LOC_Os04g30060.1
LOC_Os04g39320.4		LOC_Os04g30110.1 (268)			33									LOC_Os04g30110.1
LOC_Os04g39350.1		LOC_Os04g30160.1 (767)			324									LOC_Os04g30160.1
LOC_Os04g39880.1		LOC_Os04g30240.1 (758)			332									LOC_Os04g30240.1
LOC_Os04g39880.2		LOC_Os04g30250.1 (220)			23									LOC_Os04g30250.1
LOC_Os04g39880.3		LOC_Os04g30250.2 (220)			23									LOC_Os04g30250.2
LOC_Os04g40470.1		LOC_Os04g30250.3 (142)			5									LOC_Os04g30250.3
LOC_Os04g40630.1		LOC_Os04g30330.1 (308)			25									LOC_Os04g30330.1
LOC_Os04g40630.2		LOC_Os04g30340.1 (349)			36									LOC_Os04g30340.1
LOC_Os04g40630.3		LOC_Os04g32110.1 (471)			340									LOC_Os04g32110.1
LOC_Os04g40630.4		LOC_Os04g33240.1 (276)			186									LOC_Os04g33240.1
LOC_Os04g40990.1		LOC_Os04g33610.1 (218)			21	K15603	1							LOC_Os04g33610.1
LOC_Os04g40990.2		LOC_Os04g34360.1 (566)			279									LOC_Os04g34360.1
LOC_Os04g41229.1		LOC_Os04g35130.1 (491)			118									LOC_Os04g35130.1
LOC_Os04g41229.2		LOC_Os04g35540.1 (531)			474									LOC_Os04g35540.1
LOC_Os04g42250.2		LOC_Os04g37740.1 (416)			64									LOC_Os04g37740.1
LOC_Os04g42250.3		LOC_Os04g37790.1 (533)			178									LOC_Os04g37790.1
LOC_Os04g42250.4		LOC_Os04g37790.2 (471)			163									LOC_Os04g37790.2
LOC_Os04g43200.1		LOC_Os04g39300.1 (217)			19	K11789	1							LOC_Os04g39300.1
LOC_Os04g43200.2		LOC_Os04g39320.2 (202)			13	K03254	1							LOC_Os04g39320.2
LOC_Os04g43410.1		LOC_Os04g39320.4 (192)			18	K03254	1							LOC_Os04g39320.4
LOC_Os04g43440.1		LOC_Os04g39350.1 (123)			37									LOC_Os04g39350.1
LOC_Os04g43550.1		LOC_Os04g39880.1 (511)			314	K01188	107							LOC_Os04g39880.1
LOC_Os04g44354.1		LOC_Os04g39880.2 (376)			167	K01188	57							LOC_Os04g39880.2
LOC_Os04g44354.2		LOC_Os04g39880.3 (392)			199	K01188	64							LOC_Os04g39880.3
LOC_Os04g44354.3		LOC_Os04g40630.1 (356)			213									LOC_Os04g40630.1
LOC_Os04g44354.4		LOC_Os04g40630.2 (330)			183									LOC_Os04g40630.2
LOC_Os04g44500.1		LOC_Os04g40630.3 (330)			183									LOC_Os04g40630.3
LOC_Os04g45090.1		LOC_Os04g40630.4 (312)			163									LOC_Os04g40630.4
LOC_Os04g45090.2		LOC_Os04g41229.1 (370)			124									LOC_Os04g41229.1
LOC_Os04g47190.1		LOC_Os04g41229.2 (348)			115									LOC_Os04g41229.2
LOC_Os04g47190.2		LOC_Os04g44354.1 (536)			244									LOC_Os04g44354.1
LOC_Os04g47780.1		LOC_Os04g44354.2 (304)			20	K22706	1							LOC_Os04g44354.2
LOC_Os04g48270.1		LOC_Os04g44354.3 (212)			55									LOC_Os04g44354.3
LOC_Os04g48270.2		LOC_Os04g44354.4 (209)			22	K22706	1							LOC_Os04g44354.4
LOC_Os04g48270.3		LOC_Os04g44500.1 (234)			165									LOC_Os04g44500.1
LOC_Os04g48270.4		LOC_Os04g48270.1 (305)			255									LOC_Os04g48270.1
LOC_Os04g49160.1		LOC_Os04g48270.2 (305)			255									LOC_Os04g48270.2
LOC_Os04g49194.1		LOC_Os04g48270.3 (305)			255									LOC_Os04g48270.3
LOC_Os04g49370.1		LOC_Os04g48270.4 (203)			57									LOC_Os04g48270.4
LOC_Os04g49748.1		LOC_Os04g49370.1 (206)			14	K19867	1							LOC_Os04g49370.1
LOC_Os04g51030.1		LOC_Os04g49748.1 (409)			215									LOC_Os04g49748.1
LOC_Os04g52100.1		LOC_Os04g51030.1 (839)			322									LOC_Os04g51030.1
LOC_Os04g52640.1		LOC_Os04g52640.1 (1023)			695									LOC_Os04g52640.1
LOC_Os04g52640.2		LOC_Os04g52640.2 (891)			602									LOC_Os04g52640.2
LOC_Os04g52640.3		LOC_Os04g52640.3 (891)			602									LOC_Os04g52640.3

## Sheet: 1
Pathway (144)	Brite (31)	Brite Table (4)	Module (1)
Metabolism	Genes and Proteins	Annotation guide	Pathway modules
Global and overview maps	Orthologs, modules and networks	br01610 Ribosomal proteins (11)	Lipid metabolism
01100 Metabolic pathways (67)	ko00001 KEGG Orthology (KO) (162)	br01611 RNA polymerases (1)	Fatty acid metabolism
01110 Biosynthesis of secondary metabolites (52)	Protein families: metabolism	br01613 Aminoacyl-tRNA synthetases (1)	M00086 beta-Oxidation, acyl-CoA synthesis (1) (complete)
01120 Microbial metabolism in diverse environments (15)	ko01000 Enzymes (103)	br01601 Enzymes of 2-oxocarboxylic acid metabolism (3)
01200 Carbon metabolism (12)	ko01001 Protein kinases (1)
01210 2-Oxocarboxylic acid metabolism (3)	ko01009 Protein phosphatases and associated proteins (2)
01212 Fatty acid metabolism (3)	ko01002 Peptidases and inhibitors (6)
01230 Biosynthesis of amino acids (6)	ko01003 Glycosyltransferases (4)
01240 Biosynthesis of cofactors (8)	ko01004 Lipid biosynthesis proteins (3)
01220 Degradation of aromatic compounds (1)	ko01007 Amino acid related enzymes (6)
Carbohydrate metabolism	ko00199 Cytochrome P450 (5)
00010 Glycolysis / Gluconeogenesis (8)	ko00194 Photosynthesis proteins (2)
00020 Citrate cycle (TCA cycle) (3)	Protein families: genetic information processing
00030 Pentose phosphate pathway (2)	ko03000 Transcription factors (6)
00040 Pentose and glucuronate interconversions (1)	ko03021 Transcription machinery (1)
00051 Fructose and mannose metabolism (2)	ko03019 Messenger RNA biogenesis (1)
00052 Galactose metabolism (4)	ko03041 Spliceosome (1)
00053 Ascorbate and aldarate metabolism (5)	ko03011 Ribosome (11)
00500 Starch and sucrose metabolism (6)	ko03009 Ribosome biogenesis (1)
00520 Amino sugar and nucleotide sugar metabolism (6)	ko03016 Transfer RNA biogenesis (4)
00620 Pyruvate metabolism (6)	ko03012 Translation factors (1)
00630 Glyoxylate and dicarboxylate metabolism (4)	ko03110 Chaperones and folding catalysts (2)
00640 Propanoate metabolism (1)	ko04131 Membrane trafficking (5)
00562 Inositol phosphate metabolism (2)	ko04121 Ubiquitin system (4)
Energy metabolism	ko03051 Proteasome (1)
00190 Oxidative phosphorylation (2)	ko03036 Chromosome and associated proteins (5)
00195 Photosynthesis (1)	ko03400 DNA repair and recombination proteins (1)
00196 Photosynthesis - antenna proteins (1)	ko03029 Mitochondrial biogenesis (4)
00710 Carbon fixation in photosynthetic organisms (2)	Protein families: signaling and cellular processes
00720 Carbon fixation pathways in prokaryotes (2)	ko02000 Transporters (15)
00680 Methane metabolism (3)	ko02044 Secretion system (1)
Lipid metabolism	ko04812 Cytoskeleton proteins (1)
00061 Fatty acid biosynthesis (2)	ko04147 Exosome (7)
00062 Fatty acid elongation (2)	ko04090 CD molecules (1)
00071 Fatty acid degradation (3)	ko00536 Glycosaminoglycan binding proteins (1)
00073 Cutin, suberine and wax biosynthesis (2)
00140 Steroid hormone biosynthesis (1)
00561 Glycerolipid metabolism (2)
00564 Glycerophospholipid metabolism (2)
00600 Sphingolipid metabolism (1)
00591 Linoleic acid metabolism (2)
00592 alpha-Linolenic acid metabolism (2)
01040 Biosynthesis of unsaturated fatty acids (1)
Nucleotide metabolism
00240 Pyrimidine metabolism (1)
Amino acid metabolism
00250 Alanine, aspartate and glutamate metabolism (2)
00260 Glycine, serine and threonine metabolism (3)
00270 Cysteine and methionine metabolism (7)
00280 Valine, leucine and isoleucine degradation (3)
00290 Valine, leucine and isoleucine biosynthesis (2)
00310 Lysine degradation (4)
00330 Arginine and proline metabolism (1)
00340 Histidine metabolism (1)
00350 Tyrosine metabolism (1)
00360 Phenylalanine metabolism (1)
00380 Tryptophan metabolism (2)
Metabolism of other amino acids
00410 beta-Alanine metabolism (1)
00450 Selenocompound metabolism (1)
00460 Cyanoamino acid metabolism (1)
00480 Glutathione metabolism (4)
Glycan biosynthesis and metabolism
00541 O-Antigen nucleotide sugar biosynthesis (1)
Metabolism of cofactors and vitamins
00750 Vitamin B6 metabolism (1)
00770 Pantothenate and CoA biosynthesis (2)
00780 Biotin metabolism (1)
00830 Retinol metabolism (1)
00860 Porphyrin and chlorophyll metabolism (4)
00130 Ubiquinone and other terpenoid-quinone biosynthesis (2)
Metabolism of terpenoids and polyketides
00900 Terpenoid backbone biosynthesis (1)
00909 Sesquiterpenoid and triterpenoid biosynthesis (1)
00904 Diterpenoid biosynthesis (5)
00906 Carotenoid biosynthesis (1)
00981 Insect hormone biosynthesis (1)
00903 Limonene and pinene degradation (1)
Biosynthesis of other secondary metabolites
00940 Phenylpropanoid biosynthesis (7)
00945 Stilbenoid, diarylheptanoid and gingerol biosynthesis (3)
00941 Flavonoid biosynthesis (3)
00966 Glucosinolate biosynthesis (1)
00521 Streptomycin biosynthesis (1)
00524 Neomycin, kanamycin and gentamicin biosynthesis (1)
Xenobiotics biodegradation and metabolism
00625 Chloroalkane and chloroalkene degradation (2)
00626 Naphthalene degradation (1)
00980 Metabolism of xenobiotics by cytochrome P450 (2)
00982 Drug metabolism - cytochrome P450 (2)
00983 Drug metabolism - other enzymes (1)
Genetic Information Processing
Transcription
03020 RNA polymerase (1)
Translation
03010 Ribosome (11)
00970 Aminoacyl-tRNA biosynthesis (1)
03013 RNA transport (2)
03015 mRNA surveillance pathway (1)
Folding, sorting and degradation
03060 Protein export (1)
04130 SNARE interactions in vesicular transport (1)
04120 Ubiquitin mediated proteolysis (1)
03018 RNA degradation (1)
Environmental Information Processing
Membrane transport
02010 ABC transporters (1)
03070 Bacterial secretion system (1)
Signal transduction
04016 MAPK signaling pathway - plant (6)
04011 MAPK signaling pathway - yeast (2)
04066 HIF-1 signaling pathway (3)
04068 FoxO signaling pathway (1)
04070 Phosphatidylinositol signaling system (1)
04071 Sphingolipid signaling pathway (1)
04075 Plant hormone signal transduction (4)
Cellular Processes
Transport and catabolism
04146 Peroxisome (3)
04138 Autophagy - yeast (3)
Cell growth and death
04112 Cell cycle - Caulobacter (1)
04216 Ferroptosis (1)
04115 p53 signaling pathway (1)
Cellular community - prokaryotes
02024 Quorum sensing (2)
02026 Biofilm formation - Escherichia coli (1)
Organismal Systems
Endocrine system
04910 Insulin signaling pathway (2)
04922 Glucagon signaling pathway (1)
04920 Adipocytokine signaling pathway (1)
03320 PPAR signaling pathway (1)
Digestive system
04976 Bile secretion (1)
04973 Carbohydrate digestion and absorption (1)
04974 Protein digestion and absorption (2)
Nervous system
04724 Glutamatergic synapse (1)
04727 GABAergic synapse (2)
04723 Retrograde endocannabinoid signaling (1)
04721 Synaptic vesicle cycle (2)
Aging
04211 Longevity regulating pathway (2)
04212 Longevity regulating pathway - worm (3)
04213 Longevity regulating pathway - multiple species (1)
Environmental adaptation
04712 Circadian rhythm - plant (1)
04714 Thermogenesis (2)
04626 Plant-pathogen interaction (7)
Human Diseases
Cancer: overview
05200 Pathways in cancer (1)
05206 MicroRNAs in cancer (1)
05204 Chemical carcinogenesis (2)
05230 Central carbon metabolism in cancer (3)
Cancer: specific types
05225 Hepatocellular carcinoma (1)
05226 Gastric cancer (1)
Neurodegenerative disease
05010 Alzheimer disease (2)
05012 Parkinson disease (1)
05014 Amyotrophic lateral sclerosis (2)
05016 Huntington disease (1)
05020 Prion disease (1)
05022 Pathways of neurodegeneration - multiple diseases (2)
Substance dependence
05032 Morphine addiction (1)
05033 Nicotine addiction (1)
Cardiovascular disease
05418 Fluid shear stress and atherosclerosis (1)
Endocrine and metabolic disease
04930 Type II diabetes mellitus (1)
04932 Non-alcoholic fatty liver disease (1)
04934 Cushing syndrome (1)
Infectious disease: bacterial
05130 Pathogenic Escherichia coli infection (1)
05132 Salmonella infection (1)
05131 Shigellosis (1)
Infectious disease: viral
05162 Measles (1)
Drug resistance: antineoplastic
01524 Platinum drug resistance (1)

## Sheet: Down
GO Found=341		Query	KO	Definition	Score	Second best			KO	Definition			Not found	found		Not found		Model		Model	Putative Function		helix-loop-helix DNA-binding domain containing protein, expressed	2
LOC_Os01g02870.1		LOC_Os01g50080.1 (1155)	K05658	ABCB1, CD243; ATP-binding cassette, subfamily B (MDR/TAP), member 1 [EC:7.6.2.2]	784				K01853	CAS1; cycloartenol synthase [EC:5.4.99.8]	3		LOC_Os01g02870.1	LOC_Os01g50080.1		LOC_Os01g02870		LOC_Os01g02870.1		LOC_Os01g02870	auxin-induced protein 5NG4, putative, expressed		NAD dependent epimerase/dehydratase family protein, putative, expressed	2
LOC_Os01g02870.1,		LOC_Os04g33660.1 (279)	K01674	cah; carbonic anhydrase [EC:4.2.1.1]	219				K01087	otsB; trehalose 6-phosphate phosphatase [EC:3.1.3.12]	2		LOC_Os01g09540.1	LOC_Os04g33660.1		LOC_Os01g09540		LOC_Os01g09540.1		LOC_Os01g09540	HAD superfamily phosphatase, putative, expressed		auxin-induced protein 5NG4, putative, expressed	1
LOC_Os01g04920.1		LOC_Os02g04750.1 (399)	K01853	CAS1; cycloartenol synthase [EC:5.4.99.8]	130				K05929	NMT; phosphoethanolamine N-methyltransferase [EC:2.1.1.103]	2		LOC_Os01g43700.1	LOC_Os02g04750.1		LOC_Os01g43700		LOC_Os01g43700.1		LOC_Os01g43700	cytochrome P450 72A1, putative, expressed		cation efflux family protein, putative, expressed	1
LOC_Os01g04920.1,		LOC_Os02g04750.3 (327)	K01853	CAS1; cycloartenol synthase [EC:5.4.99.8]	90				K17469	SULTR2; sulfate transporter 2, low-affinity	2		LOC_Os01g62460.1	LOC_Os02g04750.3		LOC_Os01g62460		LOC_Os01g62460.1		LOC_Os01g62460	ZOS1-16 - C2H2 zinc finger protein, expressed		CSLE6 - cellulose synthase-like family E, expressed	1
LOC_Os01g04920.2		LOC_Os11g18366.2 (618)	K01853	CAS1; cycloartenol synthase [EC:5.4.99.8]	302				K00705	malQ; 4-alpha-glucanotransferase [EC:2.4.1.25]	1		LOC_Os01g62460.2	LOC_Os11g18366.2		LOC_Os01g72370		LOC_Os01g72370.1		LOC_Os01g72370	helix-loop-helix DNA-binding domain containing protein, expressed		cytochrome P450 72A1, putative, expressed	1
LOC_Os01g04920.2,		LOC_Os08g43400.3 (987)	K11498	CENPE; centromeric protein E	572				K00787	FDPS; farnesyl diphosphate synthase [EC:2.5.1.1 2.5.1.10]	1		LOC_Os01g62460.3	LOC_Os08g43400.3		LOC_Os02g07830		LOC_Os02g07830.1		LOC_Os02g07830	OsHKT1;3 - Na+ transporter, expressed		expressed protein	1
LOC_Os01g04920.3,		LOC_Os07g09190.1 (714)	K01662	dxs; 1-deoxy-D-xylulose-5-phosphate synthase [EC:2.2.1.7]	698				K01611	speD, AMD1; S-adenosylmethionine decarboxylase [EC:4.1.1.50]	1		LOC_Os01g72370.1	LOC_Os07g09190.1		LOC_Os03g12530		LOC_Os03g12530.1		LOC_Os03g12530	cation efflux family protein, putative, expressed		fringe-related protein, putative, expressed	1
LOC_Os01g07630.1,		LOC_Os05g47540.3 (388)	K05929	E2.1.1.103, NMT; phosphoethanolamine N-methyltransferase [EC:2.1.1.103]	309				K01662	dxs; 1-deoxy-D-xylulose-5-phosphate synthase [EC:2.2.1.7]	1		LOC_Os02g07830.1	LOC_Os05g47540.3		LOC_Os03g26210		LOC_Os03g26210.1		LOC_Os03g26210	helix-loop-helix DNA-binding domain containing protein, expressed		HAD superfamily phosphatase, putative, expressed	1
LOC_Os01g09540.1		LOC_Os05g47545.1 (492)	K05929	E2.1.1.103, NMT; phosphoethanolamine N-methyltransferase [EC:2.1.1.103]	404				K01674	cah; carbonic anhydrase [EC:4.2.1.1]	1		LOC_Os03g12530.1	LOC_Os05g47545.1		LOC_Os03g52239		LOC_Os03g52239.1		LOC_Os03g52239	homeobox domain containing protein, expressed		homeobox domain containing protein, expressed	1
LOC_Os01g09540.1,		LOC_Os06g05130.1 (428)	K10781	FATB; fatty acyl-ACP thioesterase B [EC:3.1.2.14 3.1.2.21]	362				K01695	trpA; tryptophan synthase alpha chain [EC:4.2.1.20]	1		LOC_Os03g26210.1	LOC_Os06g05130.1		LOC_Os03g54000		LOC_Os03g54000.1		LOC_Os03g54000	oligopeptide transporter, putative, expressed		major facilitator superfamily antiporter, putative, expressed	1
LOC_Os01g10240.1,		LOC_Os01g50050.2 (248)	K00787	FDPS; farnesyl diphosphate synthase [EC:2.5.1.1 2.5.1.10]	161				K05658	ABCB1, CD243; ATP-binding cassette, subfamily B (MDR/TAP), member 1 [EC:7.6.2.2]	1		LOC_Os03g26210.2	LOC_Os01g50050.2		LOC_Os03g56270		LOC_Os03g56270.1		LOC_Os03g56270	receptor protein kinase CLAVATA1 precursor, putative, expressed		oligopeptide transporter, putative, expressed	1
LOC_Os01g10450.1,		LOC_Os03g22634.1 (643)	K15803	GERD; (-)-germacrene D synthase [EC:4.2.3.75]	29				K07198	PRKAA, AMPK; 5'-AMP-activated protein kinase, catalytic alpha subunit [EC:2.7.11.11]	1		LOC_Os03g26210.3	LOC_Os03g22634.1		LOC_Os03g60190		LOC_Os03g60190.1		LOC_Os03g60190	oxidoreductase, 2OG-Fe oxygenase family protein, putative, expressed		OsHKT1;3 - Na+ transporter, expressed	1
LOC_Os01g10450.2,		LOC_Os09g37910.1 (140)	K11296	HMGB3; high mobility group protein B3	17				K08064	NFYA, HAP2; nuclear transcription factor Y, alpha	1		LOC_Os03g52239.1	LOC_Os09g37910.1		LOC_Os04g53350		LOC_Os04g53350.1		LOC_Os04g53350	expressed protein		oxidoreductase, 2OG-Fe oxygenase family protein, putative, expressed	1
LOC_Os01g12210.1,		LOC_Os01g49470.1 (1237)	K16276	BTS; zinc finger protein-like protein	1017				K10781	FATB; fatty acyl-ACP thioesterase B [EC:3.1.2.14 3.1.2.21]	1		LOC_Os03g52239.2	LOC_Os01g49470.1		LOC_Os07g40974		LOC_Os07g40974.1		LOC_Os07g40974	NAD dependent epimerase/dehydratase family protein, putative, expressed		protein kinase domain containing protein, expressed	1
LOC_Os01g13229.1,		LOC_Os07g43390.1 (595)	K00705	malQ; 4-alpha-glucanotransferase [EC:2.4.1.25]	611				K11296	HMGB3; high mobility group protein B3	1		LOC_Os03g54000.1	LOC_Os07g43390.1		LOC_Os08g04300		LOC_Os08g04300.1		LOC_Os08g04300	fringe-related protein, putative, expressed		receptor protein kinase CLAVATA1 precursor, putative, expressed	1
LOC_Os01g13540.1,		LOC_Os12g42280.1 (614)	K09840	NCED; 9-cis-epoxycarotenoid dioxygenase [EC:1.13.11.51]	653				K11498	CENPE; centromeric protein E	1		LOC_Os03g56270.1	LOC_Os12g42280.1		LOC_Os09g30130		LOC_Os09g30130.1		LOC_Os09g30130	CSLE6 - cellulose synthase-like family E, expressed		remorin C-terminal domain containing protein, putative, expressed	1
LOC_Os01g14630.1,		LOC_Os12g42400.3 (312)	K08064	NFYA, HAP2; nuclear transcription factor Y, alpha	200				K14709	SLC39A1_2_3, ZIP1_2_3; solute carrier family 39 (zinc transporter), member 1/2/3	1		LOC_Os03g56270.2	LOC_Os12g42400.3		LOC_Os10g36000		LOC_Os10g36000.1		LOC_Os10g36000	remorin C-terminal domain containing protein, putative, expressed		ZOS1-16 - C2H2 zinc finger protein, expressed	1
LOC_Os01g32364.1,		LOC_Os08g31630.2 (298)	K01087	otsB; trehalose 6-phosphate phosphatase [EC:3.1.3.12]	207				K15015	SLC32A, VGAT; solute carrier family 32 (vesicular inhibitory amino acid transporter)	1		LOC_Os03g60190.1	LOC_Os08g31630.2		LOC_Os11g04150		LOC_Os11g04150.1		LOC_Os11g04150	major facilitator superfamily antiporter, putative, expressed
LOC_Os01g40870.1,		LOC_Os08g31630.1 (371)	K01087	otsB; trehalose 6-phosphate phosphatase [EC:3.1.3.12]	391				K15803	GERD; (-)-germacrene D synthase [EC:4.2.3.75]	1		LOC_Os04g53350.1	LOC_Os08g31630.1		LOC_Os12g02810		LOC_Os12g02810.1		LOC_Os12g02810	protein kinase domain containing protein, expressed
LOC_Os01g43700.1		LOC_Os09g07120.1 (1018)	K10908	POLRMT, RPO41; DNA-directed RNA polymerase, mitochondrial [EC:2.7.7.6]	918				K16276	BTS; zinc finger protein-like protein	1		LOC_Os07g40974.1	LOC_Os09g07120.1		LOC_Os12g03899		LOC_Os12g03899.1		LOC_Os12g03899	major facilitator superfamily antiporter, putative, expressed
LOC_Os01g43700.1,		LOC_Os05g26820.1 (458)	K07198	PRKAA, AMPK; 5'-AMP-activated protein kinase, catalytic alpha subunit [EC:2.7.11.11]	204								LOC_Os07g40974.2	LOC_Os05g26820.1
LOC_Os01g43700.2,		LOC_Os04g12499.1 (181)	K15015	SLC32A, VGAT; solute carrier family 32 (vesicular inhibitory amino acid transporter)	57								LOC_Os08g04300.1	LOC_Os04g12499.1
LOC_Os01g46720.1,		LOC_Os03g46454.1 (235)	K14709	SLC39A1_2_3, ZIP1_2_3; solute carrier family 39 (zinc transporter), member 1/2/3	114								LOC_Os09g30130.1	LOC_Os03g46454.1
LOC_Os01g47410.1,		LOC_Os09g25620.2 (393)	K01611	speD, AMD1; S-adenosylmethionine decarboxylase [EC:4.1.1.50]	344								LOC_Os10g36000.2	LOC_Os09g25620.2
LOC_Os01g47410.2,		LOC_Os01g04920.2 (307)	K06119	SQD2; sulfoquinovosyltransferase [EC:2.4.1.-]	80								LOC_Os11g04150.1	LOC_Os01g04920.2
LOC_Os01g49470.1		LOC_Os01g04920.1 (515)	K06119	SQD2; sulfoquinovosyltransferase [EC:2.4.1.-]	312								LOC_Os12g02810.1	LOC_Os01g04920.1
LOC_Os01g49470.1,		LOC_Os03g09930.1 (657)	K17469	SULTR2; sulfate transporter 2, low-affinity	498								LOC_Os12g03899.1	LOC_Os03g09930.1
LOC_Os01g49470.2,		LOC_Os03g09930.2 (402)	K17469	SULTR2; sulfate transporter 2, low-affinity	224								LOC_Os12g03899.3	LOC_Os03g09930.2
LOC_Os01g50050.1,		LOC_Os02g27490.3 (346)	K03453	TC.BASS; bile acid:Na+ symporter, BASS family	257								LOC_Os12g03899.4	LOC_Os02g27490.3
LOC_Os01g50050.2		LOC_Os02g27490.2 (424)	K03453	TC.BASS; bile acid:Na+ symporter, BASS family	391									LOC_Os02g27490.2
LOC_Os01g50050.2,		LOC_Os03g08900.1 (490)	K03327	TC.MATE, SLC47A, norM, mdtK, dinF; multidrug resistance protein, MATE family	553									LOC_Os03g08900.1
LOC_Os01g50060.1,		LOC_Os03g58300.1 (325)	K01695	trpA; tryptophan synthase alpha chain [EC:4.2.1.20]	121	K13222	46							LOC_Os03g58300.1
LOC_Os01g50070.1,		LOC_Os03g52239.2 (342)			71									LOC_Os03g52239.2
LOC_Os01g50080.1		LOC_Os01g72370.1 (249)			109									LOC_Os01g72370.1
LOC_Os01g50080.1,		LOC_Os03g56270.2 (1030)			850									LOC_Os03g56270.2
LOC_Os01g51980.1,		LOC_Os03g60190.1 (372)			251									LOC_Os03g60190.1
LOC_Os01g52010.1,		LOC_Os12g02810.1 (226)			121									LOC_Os12g02810.1
LOC_Os01g56330.1,		LOC_Os01g62460.1 (821)			524									LOC_Os01g62460.1
LOC_Os01g59410.1,		LOC_Os10g36000.2 (134)			23	K00249	1							LOC_Os10g36000.2
LOC_Os01g62460.1		LOC_Os03g52239.1 (791)			344									LOC_Os03g52239.1
LOC_Os01g62460.1,		LOC_Os03g12530.1 (398)			532									LOC_Os03g12530.1
LOC_Os01g62460.2		LOC_Os11g04150.1 (399)			192									LOC_Os11g04150.1
LOC_Os01g62460.2,		LOC_Os01g09540.1 (304)			152									LOC_Os01g09540.1
LOC_Os01g62460.3		LOC_Os03g26210.1 (275)			66									LOC_Os03g26210.1
LOC_Os01g62460.3,		LOC_Os04g53350.1 (697)			328									LOC_Os04g53350.1
LOC_Os01g65110.1,		LOC_Os02g07830.1 (532)			386									LOC_Os02g07830.1
LOC_Os01g65650.1,		LOC_Os12g03899.3 (485)			426									LOC_Os12g03899.3
LOC_Os01g70310.1,		LOC_Os03g26210.3 (253)			101									LOC_Os03g26210.3
LOC_Os01g70310.2,		LOC_Os01g02870.1 (375)			295									LOC_Os01g02870.1
LOC_Os01g71720.1,		LOC_Os01g43700.1 (555)			467									LOC_Os01g43700.1
LOC_Os01g72370.1		LOC_Os07g40974.1 (339)			208									LOC_Os07g40974.1
LOC_Os01g72370.1,		LOC_Os01g62460.2 (821)			524									LOC_Os01g62460.2
LOC_Os01g72370.2,		LOC_Os03g56270.1 (1030)			850									LOC_Os03g56270.1
LOC_Os01g72370.3,		LOC_Os12g03899.4 (426)			349									LOC_Os12g03899.4
LOC_Os02g02930.1,		LOC_Os07g40974.2 (314)			157									LOC_Os07g40974.2
LOC_Os02g04750.1		LOC_Os09g30130.1 (729)			552									LOC_Os09g30130.1
LOC_Os02g04750.1,		LOC_Os03g26210.2 (253)			101									LOC_Os03g26210.2
LOC_Os02g04750.2,		LOC_Os01g62460.3 (706)			493									LOC_Os01g62460.3
LOC_Os02g04750.3		LOC_Os08g04300.1 (494)			352									LOC_Os08g04300.1
LOC_Os02g04750.3,		LOC_Os12g03899.1 (503)			417									LOC_Os12g03899.1
LOC_Os02g04760.1,		LOC_Os03g54000.1 (758)			702									LOC_Os03g54000.1
LOC_Os02g05920.1,
LOC_Os02g07830.1
LOC_Os02g07830.1,
LOC_Os02g10120.1,
LOC_Os02g17780.1,
LOC_Os02g21009.1,
LOC_Os02g21009.2,
LOC_Os02g27490.1,
LOC_Os02g27490.2
LOC_Os02g27490.2,
LOC_Os02g27490.3
LOC_Os02g27490.3,
LOC_Os02g36210.1,
LOC_Os02g36880.1,
LOC_Os02g36880.2,
LOC_Os02g36880.3,
LOC_Os02g36880.4,
LOC_Os02g40664.1,
LOC_Os02g48770.1,
LOC_Os02g56510.1,
LOC_Os03g02750.1,
LOC_Os03g03790.1,
LOC_Os03g05910.1,
LOC_Os03g05910.2,
LOC_Os03g05910.3,
LOC_Os03g08110.1,
LOC_Os03g08900.1
LOC_Os03g08900.1,
LOC_Os03g09930.1
LOC_Os03g09930.1,
LOC_Os03g09930.2
LOC_Os03g09930.2,
LOC_Os03g11110.1,
LOC_Os03g12530.1
LOC_Os03g12530.1,
LOC_Os03g12990.1,
LOC_Os03g13560.1,
LOC_Os03g22634.1
LOC_Os03g22634.1,
LOC_Os03g26210.1
LOC_Os03g26210.1,
LOC_Os03g26210.2
LOC_Os03g26210.2,
LOC_Os03g26210.3
LOC_Os03g26210.3,
LOC_Os03g31730.1,
LOC_Os03g32470.1,
LOC_Os03g32470.2,
LOC_Os03g44740.1,
LOC_Os03g46454.1
LOC_Os03g46454.1,
LOC_Os03g48030.1,
LOC_Os03g52239.1
LOC_Os03g52239.1,
LOC_Os03g52239.2
LOC_Os03g52239.2,
LOC_Os03g52239.3,
LOC_Os03g54000.1
LOC_Os03g54000.1,
LOC_Os03g54000.2,
LOC_Os03g55090.1,
LOC_Os03g56270.1
LOC_Os03g56270.1,
LOC_Os03g56270.2
LOC_Os03g56270.2,
LOC_Os03g56270.3,
LOC_Os03g58300.1
LOC_Os03g58300.1,
LOC_Os03g60190.1
LOC_Os03g60190.1,
LOC_Os03g62170.1,
LOC_Os03g62170.2,
LOC_Os03g62670.1,
LOC_Os03g62670.2,
LOC_Os03g62670.3,
LOC_Os03g63330.1,
LOC_Os04g12499.1
LOC_Os04g12499.1,
LOC_Os04g12530.1,
LOC_Os04g15920.1,
LOC_Os04g18090.1,
LOC_Os04g21350.1,
LOC_Os04g21350.2,
LOC_Os04g32850.1,
LOC_Os04g32850.2,
LOC_Os04g33460.1,
LOC_Os04g33660.1
LOC_Os04g33660.1,
LOC_Os04g33660.2,
LOC_Os04g34250.1,
LOC_Os04g35080.1,
LOC_Os04g35100.1,
LOC_Os04g38310.1,
LOC_Os04g38310.2,
LOC_Os04g38310.3,
LOC_Os04g43800.1,
LOC_Os04g48930.1,
LOC_Os04g48930.2,
LOC_Os04g48930.3,
LOC_Os04g48930.4,
LOC_Os04g53350.1
LOC_Os04g53350.1,
LOC_Os04g57560.1,
LOC_Os05g05690.1,
LOC_Os05g06920.1,
LOC_Os05g11320.1,
LOC_Os05g12630.1,
LOC_Os05g12630.2,
LOC_Os05g12640.1,
LOC_Os05g12640.2,
LOC_Os05g12640.3,
LOC_Os05g12640.4,
LOC_Os05g12640.6,
LOC_Os05g25370.1,
LOC_Os05g26820.1
LOC_Os05g26820.1,
LOC_Os05g32210.1,
LOC_Os05g35200.2,
LOC_Os05g35200.4,
LOC_Os05g39800.1,
LOC_Os05g45770.1,
LOC_Os05g45770.2,
LOC_Os05g47540.1,
LOC_Os05g47540.2,
LOC_Os05g47540.3
LOC_Os05g47540.3,
LOC_Os05g47540.4,
LOC_Os05g47540.5,
LOC_Os05g47545.1
LOC_Os05g47545.1,
LOC_Os05g47780.1,
LOC_Os05g51470.1,
LOC_Os06g02000.1,
LOC_Os06g02000.2,
LOC_Os06g02000.3,
LOC_Os06g03930.1,
LOC_Os06g03930.2,
LOC_Os06g04020.1,
LOC_Os06g05130.1
LOC_Os06g05130.1,
LOC_Os06g08090.1,
LOC_Os06g08090.2,
LOC_Os06g10410.1,
LOC_Os06g12790.1,
LOC_Os06g12790.3,
LOC_Os06g14240.1,
LOC_Os06g20370.1,
LOC_Os06g30179.1,
LOC_Os06g34120.1,
LOC_Os06g35050.1,
LOC_Os06g35940.1,
LOC_Os06g47650.1,
LOC_Os06g48180.1,
LOC_Os06g49040.1,
LOC_Os07g04990.1,
LOC_Os07g04990.2,
LOC_Os07g07050.1,
LOC_Os07g07050.2,
LOC_Os07g08710.1,
LOC_Os07g08710.2,
LOC_Os07g09190.1
LOC_Os07g09190.1,
LOC_Os07g15460.1,
LOC_Os07g15460.2,
LOC_Os07g23120.1,
LOC_Os07g23120.2,
LOC_Os07g30950.1,
LOC_Os07g34260.1,
LOC_Os07g37230.1,
LOC_Os07g40974.1
LOC_Os07g40974.1,
LOC_Os07g40974.2
LOC_Os07g40974.2,
LOC_Os07g42994.1,
LOC_Os07g43390.1
LOC_Os07g43390.1,
LOC_Os07g46920.1,
LOC_Os07g48690.1,
LOC_Os07g49110.1,
LOC_Os08g01770.1,
LOC_Os08g01770.2,
LOC_Os08g04300.1
LOC_Os08g04300.1,
LOC_Os08g04500.1,
LOC_Os08g04500.2,
LOC_Os08g05280.1,
LOC_Os08g07080.1,
LOC_Os08g08140.1,
LOC_Os08g31630.1
LOC_Os08g31630.1,
LOC_Os08g31630.2
LOC_Os08g31630.2,
LOC_Os08g36480.1,
LOC_Os08g43390.1,
LOC_Os08g43400.1,
LOC_Os08g43400.2,
LOC_Os08g43400.3
LOC_Os08g43400.3,
LOC_Os08g43400.4,
LOC_Os09g04339.1,
LOC_Os09g07120.1
LOC_Os09g07120.1,
LOC_Os09g07120.2,
LOC_Os09g09930.1,
LOC_Os09g12290.1,
LOC_Os09g12660.1,
LOC_Os09g12660.2,
LOC_Os09g17600.1,
LOC_Os09g17600.2,
LOC_Os09g17600.3,
LOC_Os09g25620.1,
LOC_Os09g25620.2
LOC_Os09g25620.2,
LOC_Os09g25620.3,
LOC_Os09g25620.4,
LOC_Os09g25625.1,
LOC_Os09g25810.2,
LOC_Os09g27820.1,
LOC_Os09g28620.1,
LOC_Os09g30130.1
LOC_Os09g30130.1,
LOC_Os09g30130.2,
LOC_Os09g30380.1,
LOC_Os09g34180.1,
LOC_Os09g36680.1,
LOC_Os09g36930.1,
LOC_Os09g37710.1,
LOC_Os09g37710.2,
LOC_Os09g37910.1
LOC_Os09g37910.1,
LOC_Os10g02220.1,
LOC_Os10g02220.2,
LOC_Os10g02220.3,
LOC_Os10g02220.4,
LOC_Os10g02220.5,
LOC_Os10g14870.1,
LOC_Os10g21396.1,
LOC_Os10g34790.1,
LOC_Os10g36000.1,
LOC_Os10g36000.2
LOC_Os10g36000.2,
LOC_Os10g36000.3,
LOC_Os10g41060.1,
LOC_Os10g41260.1,
LOC_Os10g42800.1,
LOC_Os11g02520.1,
LOC_Os11g04150.1
LOC_Os11g04150.1,
LOC_Os11g18366.2
LOC_Os11g18366.2,
LOC_Os11g18366.3,
LOC_Os11g18366.4,
LOC_Os11g22350.1,
LOC_Os11g26880.1,
LOC_Os11g29720.1,
LOC_Os11g39990.1,
LOC_Os12g02810.1
LOC_Os12g02810.1,
LOC_Os12g02980.1,
LOC_Os12g02980.2,
LOC_Os12g03899.1
LOC_Os12g03899.1,
LOC_Os12g03899.2,
LOC_Os12g03899.3
LOC_Os12g03899.3,
LOC_Os12g03899.4
LOC_Os12g03899.4,
LOC_Os12g08220.1,
LOC_Os12g08760.1,
LOC_Os12g18770.1,
LOC_Os12g22284.1,
LOC_Os12g25490.1,
LOC_Os12g41200.1,
LOC_Os12g42280.1
LOC_Os12g42280.1,
LOC_Os12g42400.1,
LOC_Os12g42400.2,
LOC_Os12g42400.3
LOC_Os12g42400.3,
LOC_Os12g42400.4,

## Sheet: 2
Pathway (52)	Brite (15)	Brite Table (0)	Module (0)
Metabolism	Genes and Proteins
Global and overview maps	Orthologs, modules and networks
01100 Metabolic pathways (11)	ko00001 KEGG Orthology (KO) (25)
01110 Biosynthesis of secondary metabolites (7)	Protein families: metabolism
01212 Fatty acid metabolism (1)	ko01000 Enzymes (16)
01230 Biosynthesis of amino acids (1)	ko01001 Protein kinases (1)
Carbohydrate metabolism	ko01009 Protein phosphatases and associated proteins (1)
00500 Starch and sucrose metabolism (2)	ko01003 Glycosyltransferases (1)
Energy metabolism	ko01004 Lipid biosynthesis proteins (1)
00910 Nitrogen metabolism (1)	ko01006 Prenyltransferases (1)
Lipid metabolism	Protein families: genetic information processing
00061 Fatty acid biosynthesis (1)	ko03000 Transcription factors (1)
00100 Steroid biosynthesis (1)	ko04131 Membrane trafficking (1)
00561 Glycerolipid metabolism (1)	ko04121 Ubiquitin system (1)
00564 Glycerophospholipid metabolism (1)	ko03036 Chromosome and associated proteins (2)
Amino acid metabolism	ko03029 Mitochondrial biogenesis (2)
00260 Glycine, serine and threonine metabolism (1)	Protein families: signaling and cellular processes
00270 Cysteine and methionine metabolism (1)	ko02000 Transporters (5)
00330 Arginine and proline metabolism (1)	ko04147 Exosome (2)
00400 Phenylalanine, tyrosine and tryptophan biosynthesis (1)	ko04090 CD molecules (1)
Metabolism of cofactors and vitamins
00730 Thiamine metabolism (1)
Metabolism of terpenoids and polyketides
00900 Terpenoid backbone biosynthesis (2)
00909 Sesquiterpenoid and triterpenoid biosynthesis (1)
00906 Carotenoid biosynthesis (1)
Environmental Information Processing
Membrane transport
02010 ABC transporters (1)
Signal transduction
04371 Apelin signaling pathway (1)
04068 FoxO signaling pathway (1)
04151 PI3K-Akt signaling pathway (1)
04152 AMPK signaling pathway (1)
04150 mTOR signaling pathway (1)
Cellular Processes
Transport and catabolism
04140 Autophagy - animal (1)
Cellular community - eukaryotes
04530 Tight junction (1)
Organismal Systems
Immune system
04612 Antigen processing and presentation (1)
Endocrine system
04910 Insulin signaling pathway (1)
04922 Glucagon signaling pathway (1)
04920 Adipocytokine signaling pathway (1)
04921 Oxytocin signaling pathway (1)
Digestive system
04976 Bile secretion (1)
Nervous system
04727 GABAergic synapse (1)
04723 Retrograde endocannabinoid signaling (1)
04721 Synaptic vesicle cycle (1)
Development and regeneration
04361 Axon regeneration (1)
Aging
04211 Longevity regulating pathway (1)
04213 Longevity regulating pathway - multiple species (1)
Environmental adaptation
04710 Circadian rhythm (1)
04714 Thermogenesis (1)
Human Diseases
Cancer: overview
05206 MicroRNAs in cancer (1)
Cancer: specific types
05226 Gastric cancer (1)
Neurodegenerative disease
05017 Spinocerebellar ataxia (1)
Substance dependence
05032 Morphine addiction (1)
05033 Nicotine addiction (1)
Cardiovascular disease
05418 Fluid shear stress and atherosclerosis (1)
05410 Hypertrophic cardiomyopathy (1)
Endocrine and metabolic disease
04932 Non-alcoholic fatty liver disease (1)
04931 Insulin resistance (1)
Infectious disease: bacterial
05152 Tuberculosis (1)
Infectious disease: viral
05166 Human T-cell leukemia virus 1 infection (1)
05164 Influenza A (1)

## Sheet: UP_1
Pathway (144)			01100 Metabolic pathways	67
Metabolism			01110 Biosynthesis of secondary metabolites	52
Global and overview maps (167)			01120 Microbial metabolism in diverse environments	15
01100 Metabolic pathways	67		01200 Carbon metabolism	12
01110 Biosynthesis of secondary metabolites	52		03010 Ribosome	11
01120 Microbial metabolism in diverse environments	15		01240 Biosynthesis of cofactors	8
01200 Carbon metabolism	12		00010 Glycolysis / Gluconeogenesis	8
01210 2-Oxocarboxylic acid metabolism	3		04626 Plant-pathogen interaction	7
01212 Fatty acid metabolism	3		00940 Phenylpropanoid biosynthesis	7
01230 Biosynthesis of amino acids	6		00270 Cysteine and methionine metabolism	7
01240 Biosynthesis of cofactors	8		04016 MAPK signaling pathway - plant	6
01220 Degradation of aromatic compounds	1		01230 Biosynthesis of amino acids	6
Carbohydrate metabolism (50)			00620 Pyruvate metabolism	6
00010 Glycolysis / Gluconeogenesis	8		00520 Amino sugar and nucleotide sugar metabolism	6
00020 Citrate cycle	3		00500 Starch and sucrose metabolism	6
00030 Pentose phosphate pathway	2		00904 Diterpenoid biosynthesis	5
00040 Pentose and glucuronate interconversions	1		00053 Ascorbate and aldarate metabolism	5
00051 Fructose and mannose metabolism	2		04075 Plant hormone signal transduction	4
00052 Galactose metabolism	4		00860 Porphyrin and chlorophyll metabolism	4
00053 Ascorbate and aldarate metabolism	5		00630 Glyoxylate and dicarboxylate metabolism	4
00500 Starch and sucrose metabolism	6		00480 Glutathione metabolism	4
00520 Amino sugar and nucleotide sugar metabolism	6		00310 Lysine degradation	4
00620 Pyruvate metabolism	6		00052 Galactose metabolism	4
00630 Glyoxylate and dicarboxylate metabolism	4		05230 Central carbon metabolism in cancer	3
00640 Propanoate metabolism	1		04212 Longevity regulating pathway - worm	3
00562 Inositol phosphate metabolism	2		04146 Peroxisome	3
Energy metabolism (11)			04138 Autophagy - yeast	3
00190 Oxidative phosphorylation	2		04066 HIF-1 signaling pathway	3
00195 Photosynthesis	1		01212 Fatty acid metabolism	3
00196 Photosynthesis - antenna proteins	1		01210 2-Oxocarboxylic acid metabolism	3
00710 Carbon fixation in photosynthetic organisms	2		00945 Stilbenoid, diarylheptanoid and gingerol biosynthesis	3
00720 Carbon fixation pathways in prokaryotes	2		00941 Flavonoid biosynthesis	3
00680 Methane metabolism	3		00680 Methane metabolism	3
Lipid metabolism (20)			00280 Valine, leucine and isoleucine degradation	3
00061 Fatty acid biosynthesis	2		00260 Glycine, serine and threonine metabolism	3
00062 Fatty acid elongation	2		00071 Fatty acid degradation	3
00071 Fatty acid degradation	3		00020 Citrate cycle	3
00073 Cutin, suberine and wax biosynthesis	2		05204 Chemical carcinogenesis	2
00140 Steroid hormone biosynthesis	1		05022 Pathways of neurodegeneration - multiple diseases	2
00561 Glycerolipid metabolism	2		05014 Amyotrophic lateral sclerosis	2
00564 Glycerophospholipid metabolism	2		05010 Alzheimer disease	2
00600 Sphingolipid metabolism	1		04974 Protein digestion and absorption	2
00591 Linoleic acid metabolism	2		04910 Insulin signaling pathway	2
00592 alpha-Linolenic acid metabolism	2		04727 GABAergic synapse	2
01040 Biosynthesis of unsaturated fatty acids	1		04721 Synaptic vesicle cycle	2
Nucleotide metabolism (1)			04714 Thermogenesis	2
00240 Pyrimidine metabolism	1		04211 Longevity regulating pathway	2
Amino acid metabolism (27)			04011 MAPK signaling pathway - yeast	2
00250 Alanine, aspartate and glutamate metabolism	2		03013 RNA transport	2
00260 Glycine, serine and threonine metabolism	3		02024 Quorum sensing	2
00270 Cysteine and methionine metabolism	7		00982 Drug metabolism - cytochrome P450	2
00280 Valine, leucine and isoleucine degradation	3		00980 Metabolism of xenobiotics by cytochrome P450	2
00290 Valine, leucine and isoleucine biosynthesis	2		00770 Pantothenate and CoA biosynthesis	2
00310 Lysine degradation	4		00720 Carbon fixation pathways in prokaryotes	2
00330 Arginine and proline metabolism	1		00710 Carbon fixation in photosynthetic organisms	2
00340 Histidine metabolism	1		00625 Chloroalkane and chloroalkene degradation	2
00350 Tyrosine metabolism	1		00592 alpha-Linolenic acid metabolism	2
00360 Phenylalanine metabolism	1		00591 Linoleic acid metabolism	2
00380 Tryptophan metabolism	2		00564 Glycerophospholipid metabolism	2
Metabolism of other amino acids			00562 Inositol phosphate metabolism	2
00410 beta-Alanine metabolism	1		00561 Glycerolipid metabolism	2
00450 Selenocompound metabolism	1		00380 Tryptophan metabolism	2
00460 Cyanoamino acid metabolism	1		00290 Valine, leucine and isoleucine biosynthesis	2
00480 Glutathione metabolism	4		00250 Alanine, aspartate and glutamate metabolism	2
Glycan biosynthesis and metabolism			00190 Oxidative phosphorylation	2
00541 O-Antigen nucleotide sugar biosynthesis	1		00130 Ubiquinone and other terpenoid-quinone biosynthesis	2
Metabolism of cofactors and vitamins			00073 Cutin, suberine and wax biosynthesis	2
00750 Vitamin B6 metabolism	1		00062 Fatty acid elongation	2
00770 Pantothenate and CoA biosynthesis	2		00061 Fatty acid biosynthesis	2
00780 Biotin metabolism	1		00051 Fructose and mannose metabolism	2
00830 Retinol metabolism	1		00030 Pentose phosphate pathway	2
00860 Porphyrin and chlorophyll metabolism	4		05418 Fluid shear stress and atherosclerosis	1
00130 Ubiquinone and other terpenoid-quinone biosynthesis	2		05226 Gastric cancer	1
Metabolism of terpenoids and polyketides			05225 Hepatocellular carcinoma	1
00900 Terpenoid backbone biosynthesis	1		05206 MicroRNAs in cancer	1
00909 Sesquiterpenoid and triterpenoid biosynthesis	1		05200 Pathways in cancer	1
00904 Diterpenoid biosynthesis	5		05162 Measles	1
00906 Carotenoid biosynthesis	1		05132 Salmonella infection	1
00981 Insect hormone biosynthesis	1		05131 Shigellosis	1
00903 Limonene and pinene degradation	1		05130 Pathogenic Escherichia coli infection	1
Biosynthesis of other secondary metabolites			05033 Nicotine addiction	1
00940 Phenylpropanoid biosynthesis	7		05032 Morphine addiction	1
00945 Stilbenoid, diarylheptanoid and gingerol biosynthesis	3		05020 Prion disease	1
00941 Flavonoid biosynthesis	3		05016 Huntington disease	1
00966 Glucosinolate biosynthesis	1		05012 Parkinson disease	1
00521 Streptomycin biosynthesis	1		04976 Bile secretion	1
00524 Neomycin, kanamycin and gentamicin biosynthesis	1		04973 Carbohydrate digestion and absorption	1
Xenobiotics biodegradation and metabolism			04934 Cushing syndrome	1
00625 Chloroalkane and chloroalkene degradation	2		04932 Non-alcoholic fatty liver disease	1
00626 Naphthalene degradation	1		04930 Type II diabetes mellitus	1
00980 Metabolism of xenobiotics by cytochrome P450	2		04922 Glucagon signaling pathway	1
00982 Drug metabolism - cytochrome P450	2		04920 Adipocytokine signaling pathway	1
00983 Drug metabolism - other enzymes	1		04724 Glutamatergic synapse	1
			04723 Retrograde endocannabinoid signaling	1
Genetic Information Processing			04712 Circadian rhythm - plant	1
Transcription			04216 Ferroptosis	1
03020 RNA polymerase	1		04213 Longevity regulating pathway - multiple species	1
Translation			04130 SNARE interactions in vesicular transport	1
03010 Ribosome	11		04120 Ubiquitin mediated proteolysis	1
00970 Aminoacyl-tRNA biosynthesis	1		04115 p53 signaling pathway	1
03013 RNA transport	2		04112 Cell cycle - Caulobacter	1
03015 mRNA surveillance pathway	1		04071 Sphingolipid signaling pathway	1
Folding, sorting and degradation			04070 Phosphatidylinositol signaling system	1
03060 Protein export	1		04068 FoxO signaling pathway	1
04130 SNARE interactions in vesicular transport	1		03320 PPAR signaling pathway	1
04120 Ubiquitin mediated proteolysis	1		03070 Bacterial secretion system	1
03018 RNA degradation	1		03060 Protein export	1
			03020 RNA polymerase	1
Environmental Information Processing			03018 RNA degradation	1
Membrane transport			03015 mRNA surveillance pathway	1
02010 ABC transporters	1		02026 Biofilm formation - Escherichia coli	1
03070 Bacterial secretion system	1		02010 ABC transporters	1
Signal transduction			01524 Platinum drug resistance	1
04016 MAPK signaling pathway - plant	6		01220 Degradation of aromatic compounds	1
04011 MAPK signaling pathway - yeast	2		01040 Biosynthesis of unsaturated fatty acids	1
04066 HIF-1 signaling pathway	3		00983 Drug metabolism - other enzymes	1
04068 FoxO signaling pathway	1		00981 Insect hormone biosynthesis	1
04070 Phosphatidylinositol signaling system	1		00970 Aminoacyl-tRNA biosynthesis	1
04071 Sphingolipid signaling pathway	1		00966 Glucosinolate biosynthesis	1
04075 Plant hormone signal transduction	4		00909 Sesquiterpenoid and triterpenoid biosynthesis	1
			00906 Carotenoid biosynthesis	1
Cellular Processes			00903 Limonene and pinene degradation	1
Transport and catabolism			00900 Terpenoid backbone biosynthesis	1
04146 Peroxisome	3		00830 Retinol metabolism	1
04138 Autophagy - yeast	3		00780 Biotin metabolism	1
Cell growth and death			00750 Vitamin B6 metabolism	1
04112 Cell cycle - Caulobacter	1		00640 Propanoate metabolism	1
04216 Ferroptosis	1		00626 Naphthalene degradation	1
04115 p53 signaling pathway	1		00600 Sphingolipid metabolism	1
Cellular community - prokaryotes			00541 O-Antigen nucleotide sugar biosynthesis	1
02024 Quorum sensing	2		00524 Neomycin, kanamycin and gentamicin biosynthesis	1
02026 Biofilm formation - Escherichia coli	1		00521 Streptomycin biosynthesis	1
			00460 Cyanoamino acid metabolism	1
Organismal Systems			00450 Selenocompound metabolism	1
Endocrine system			00410 beta-Alanine metabolism	1
04910 Insulin signaling pathway	2		00360 Phenylalanine metabolism	1
04922 Glucagon signaling pathway	1		00350 Tyrosine metabolism	1
04920 Adipocytokine signaling pathway	1		00340 Histidine metabolism	1
03320 PPAR signaling pathway	1		00330 Arginine and proline metabolism	1
Digestive system			00240 Pyrimidine metabolism	1
04976 Bile secretion	1		00196 Photosynthesis - antenna proteins	1
04973 Carbohydrate digestion and absorption	1		00195 Photosynthesis	1
04974 Protein digestion and absorption	2		00140 Steroid hormone biosynthesis	1
Nervous system			00040 Pentose and glucuronate interconversions	1
04724 Glutamatergic synapse	1
04727 GABAergic synapse	2
04723 Retrograde endocannabinoid signaling	1
04721 Synaptic vesicle cycle	2
Aging
04211 Longevity regulating pathway	2
04212 Longevity regulating pathway - worm	3
04213 Longevity regulating pathway - multiple species	1
Environmental adaptation
04712 Circadian rhythm - plant	1
04714 Thermogenesis	2
04626 Plant-pathogen interaction	7
Human Diseases
Cancer: overview
05200 Pathways in cancer	1
05206 MicroRNAs in cancer	1
05204 Chemical carcinogenesis	2
05230 Central carbon metabolism in cancer	3
Cancer: specific types
05225 Hepatocellular carcinoma	1
05226 Gastric cancer	1
Neurodegenerative disease
05010 Alzheimer disease	2
05012 Parkinson disease	1
05014 Amyotrophic lateral sclerosis	2
05016 Huntington disease	1
05020 Prion disease	1
05022 Pathways of neurodegeneration - multiple diseases	2
Substance dependence
05032 Morphine addiction	1
05033 Nicotine addiction	1
Cardiovascular disease
05418 Fluid shear stress and atherosclerosis	1
Endocrine and metabolic disease
04930 Type II diabetes mellitus	1
04932 Non-alcoholic fatty liver disease	1
04934 Cushing syndrome	1
Infectious disease: bacterial
05130 Pathogenic Escherichia coli infection	1
05132 Salmonella infection	1
05131 Shigellosis	1
Infectious disease: viral
05162 Measles	1
Drug resistance: antineoplastic
01524 Platinum drug resistance	1

## Sheet: DOWN_1
Pathway	52		01100 Metabolic pathways	11
Metabolism			01110 Biosynthesis of secondary metabolites	7
Global and overview maps			00500 Starch and sucrose metabolism	2
01100 Metabolic pathways	11		00900 Terpenoid backbone biosynthesis	2
01110 Biosynthesis of secondary metabolites	7		01212 Fatty acid metabolism	1
01212 Fatty acid metabolism	1		01230 Biosynthesis of amino acids	1
01230 Biosynthesis of amino acids	1		00910 Nitrogen metabolism	1
Carbohydrate metabolism			00061 Fatty acid biosynthesis	1
00500 Starch and sucrose metabolism	2		00100 Steroid biosynthesis	1
Energy metabolism			00561 Glycerolipid metabolism	1
00910 Nitrogen metabolism	1		00564 Glycerophospholipid metabolism	1
Lipid metabolism			00260 Glycine, serine and threonine metabolism	1
00061 Fatty acid biosynthesis	1		00270 Cysteine and methionine metabolism	1
00100 Steroid biosynthesis	1		00330 Arginine and proline metabolism	1
00561 Glycerolipid metabolism	1		00400 Phenylalanine, tyrosine and tryptophan biosynthesis	1
00564 Glycerophospholipid metabolism	1		00730 Thiamine metabolism	1
Amino acid metabolism			00909 Sesquiterpenoid and triterpenoid biosynthesis	1
00260 Glycine, serine and threonine metabolism	1		00906 Carotenoid biosynthesis	1
00270 Cysteine and methionine metabolism	1		02010 ABC transporters	1
00330 Arginine and proline metabolism	1		04371 Apelin signaling pathway	1
00400 Phenylalanine, tyrosine and tryptophan biosynthesis	1		04068 FoxO signaling pathway	1
Metabolism of cofactors and vitamins			04151 PI3K-Akt signaling pathway	1
00730 Thiamine metabolism	1		04152 AMPK signaling pathway	1
Metabolism of terpenoids and polyketides			04150 mTOR signaling pathway	1
00900 Terpenoid backbone biosynthesis	2		04140 Autophagy - animal	1
00909 Sesquiterpenoid and triterpenoid biosynthesis	1		04530 Tight junction	1
00906 Carotenoid biosynthesis	1		04612 Antigen processing and presentation	1
			04910 Insulin signaling pathway	1
Environmental Information Processing			04922 Glucagon signaling pathway	1
Membrane transport			04920 Adipocytokine signaling pathway	1
02010 ABC transporters	1		04921 Oxytocin signaling pathway	1
Signal transduction			04976 Bile secretion	1
04371 Apelin signaling pathway	1		04727 GABAergic synapse	1
04068 FoxO signaling pathway	1		04723 Retrograde endocannabinoid signaling	1
04151 PI3K-Akt signaling pathway	1		04721 Synaptic vesicle cycle	1
04152 AMPK signaling pathway	1		04361 Axon regeneration	1
04150 mTOR signaling pathway	1		04211 Longevity regulating pathway	1
			04213 Longevity regulating pathway - multiple species	1
Cellular Processes			04710 Circadian rhythm	1
Transport and catabolism			04714 Thermogenesis	1
04140 Autophagy - animal	1		05206 MicroRNAs in cancer	1
Cellular community - eukaryotes			05226 Gastric cancer	1
04530 Tight junction	1		05017 Spinocerebellar ataxia	1
			05032 Morphine addiction	1
Organismal Systems			05033 Nicotine addiction	1
Immune system			05418 Fluid shear stress and atherosclerosis	1
04612 Antigen processing and presentation	1		05410 Hypertrophic cardiomyopathy	1
Endocrine system			04932 Non-alcoholic fatty liver disease	1
04910 Insulin signaling pathway	1		04931 Insulin resistance	1
04922 Glucagon signaling pathway	1		05152 Tuberculosis	1
04920 Adipocytokine signaling pathway	1		05166 Human T-cell leukemia virus 1 infection	1
04921 Oxytocin signaling pathway	1		05164 Influenza A	1
Digestive system
04976 Bile secretion	1
Nervous system
04727 GABAergic synapse	1
04723 Retrograde endocannabinoid signaling	1
04721 Synaptic vesicle cycle	1
Development and regeneration
04361 Axon regeneration	1
Aging
04211 Longevity regulating pathway	1
04213 Longevity regulating pathway - multiple species	1
Environmental adaptation
04710 Circadian rhythm	1
04714 Thermogenesis	1
Human Diseases
Cancer: overview
05206 MicroRNAs in cancer	1
Cancer: specific types
05226 Gastric cancer	1
Neurodegenerative disease
05017 Spinocerebellar ataxia	1
Substance dependence
05032 Morphine addiction	1
05033 Nicotine addiction	1
Cardiovascular disease
05418 Fluid shear stress and atherosclerosis	1
05410 Hypertrophic cardiomyopathy	1
Endocrine and metabolic disease
04932 Non-alcoholic fatty liver disease	1
04931 Insulin resistance	1
Infectious disease: bacterial
05152 Tuberculosis	1
Infectious disease: viral
05166 Human T-cell leukemia virus 1 infection	1
05164 Influenza A	1

## Sheet: Total
01100 Metabolic pathways	78
01110 Biosynthesis of secondary metabolites	59
01120 Microbial metabolism in diverse environments	15
01200 Carbon metabolism	12
03010 Ribosome	11
00010 Glycolysis / Gluconeogenesis	8
00270 Cysteine and methionine metabolism	8
00500 Starch and sucrose metabolism	8
01240 Biosynthesis of cofactors	8
00940 Phenylpropanoid biosynthesis	7
01230 Biosynthesis of amino acids	7
04626 Plant-pathogen interaction	7
00520 Amino sugar and nucleotide sugar metabolism	6
00620 Pyruvate metabolism	6
04016 MAPK signaling pathway - plant	6
00053 Ascorbate and aldarate metabolism	5
00904 Diterpenoid biosynthesis	5
00052 Galactose metabolism	4
00260 Glycine, serine and threonine metabolism	4
00310 Lysine degradation	4
00480 Glutathione metabolism	4
00630 Glyoxylate and dicarboxylate metabolism	4
00860 Porphyrin and chlorophyll metabolism	4
01212 Fatty acid metabolism	4
04075 Plant hormone signal transduction	4
00020 Citrate cycle	3
00061 Fatty acid biosynthesis	3
00071 Fatty acid degradation	3
00280 Valine, leucine and isoleucine degradation	3
00561 Glycerolipid metabolism	3
00564 Glycerophospholipid metabolism	3
00680 Methane metabolism	3
00900 Terpenoid backbone biosynthesis	3
00941 Flavonoid biosynthesis	3
00945 Stilbenoid, diarylheptanoid and gingerol biosynthesis	3
01210 2-Oxocarboxylic acid metabolism	3
04066 HIF-1 signaling pathway	3
04138 Autophagy - yeast	3
04146 Peroxisome	3
04211 Longevity regulating pathway	3
04212 Longevity regulating pathway - worm	3
04714 Thermogenesis	3
04721 Synaptic vesicle cycle	3
04727 GABAergic synapse	3
04910 Insulin signaling pathway	3
05230 Central carbon metabolism in cancer	3
00030 Pentose phosphate pathway	2
00051 Fructose and mannose metabolism	2
00062 Fatty acid elongation	2
00073 Cutin, suberine and wax biosynthesis	2
00130 Ubiquinone and other terpenoid-quinone biosynthesis	2
00190 Oxidative phosphorylation	2
00250 Alanine, aspartate and glutamate metabolism	2
00290 Valine, leucine and isoleucine biosynthesis	2
00330 Arginine and proline metabolism	2
00380 Tryptophan metabolism	2
00562 Inositol phosphate metabolism	2
00591 Linoleic acid metabolism	2
00592 alpha-Linolenic acid metabolism	2
00625 Chloroalkane and chloroalkene degradation	2
00710 Carbon fixation in photosynthetic organisms	2
00720 Carbon fixation pathways in prokaryotes	2
00770 Pantothenate and CoA biosynthesis	2
00906 Carotenoid biosynthesis	2
00909 Sesquiterpenoid and triterpenoid biosynthesis	2
00980 Metabolism of xenobiotics by cytochrome P450	2
00982 Drug metabolism - cytochrome P450	2
02010 ABC transporters	2
02024 Quorum sensing	2
03013 RNA transport	2
04011 MAPK signaling pathway - yeast	2
04068 FoxO signaling pathway	2
04213 Longevity regulating pathway - multiple species	2
04723 Retrograde endocannabinoid signaling	2
04920 Adipocytokine signaling pathway	2
04922 Glucagon signaling pathway	2
04932 Non-alcoholic fatty liver disease	2
04974 Protein digestion and absorption	2
04976 Bile secretion	2
05010 Alzheimer disease	2
05014 Amyotrophic lateral sclerosis	2
05022 Pathways of neurodegeneration - multiple diseases	2
05032 Morphine addiction	2
05033 Nicotine addiction	2
05204 Chemical carcinogenesis	2
05206 MicroRNAs in cancer	2
05226 Gastric cancer	2
05418 Fluid shear stress and atherosclerosis	2
00040 Pentose and glucuronate interconversions	1
00100 Steroid biosynthesis	1
00140 Steroid hormone biosynthesis	1
00195 Photosynthesis	1
00196 Photosynthesis - antenna proteins	1
00240 Pyrimidine metabolism	1
00340 Histidine metabolism	1
00350 Tyrosine metabolism	1
00360 Phenylalanine metabolism	1
00400 Phenylalanine, tyrosine and tryptophan biosynthesis	1
00410 beta-Alanine metabolism	1
00450 Selenocompound metabolism	1
00460 Cyanoamino acid metabolism	1
00521 Streptomycin biosynthesis	1
00524 Neomycin, kanamycin and gentamicin biosynthesis	1
00541 O-Antigen nucleotide sugar biosynthesis	1
00600 Sphingolipid metabolism	1
00626 Naphthalene degradation	1
00640 Propanoate metabolism	1
00730 Thiamine metabolism	1
00750 Vitamin B6 metabolism	1
00780 Biotin metabolism	1
00830 Retinol metabolism	1
00903 Limonene and pinene degradation	1
00910 Nitrogen metabolism	1
00966 Glucosinolate biosynthesis	1
00970 Aminoacyl-tRNA biosynthesis	1
00981 Insect hormone biosynthesis	1
00983 Drug metabolism - other enzymes	1
01040 Biosynthesis of unsaturated fatty acids	1
01220 Degradation of aromatic compounds	1
01524 Platinum drug resistance	1
02026 Biofilm formation - Escherichia coli	1
03015 mRNA surveillance pathway	1
03018 RNA degradation	1
03020 RNA polymerase	1
03060 Protein export	1
03070 Bacterial secretion system	1
03320 PPAR signaling pathway	1
04070 Phosphatidylinositol signaling system	1
04071 Sphingolipid signaling pathway	1
04112 Cell cycle - Caulobacter	1
04115 p53 signaling pathway	1
04120 Ubiquitin mediated proteolysis	1
04130 SNARE interactions in vesicular transport	1
04140 Autophagy - animal	1
04150 mTOR signaling pathway	1
04151 PI3K-Akt signaling pathway	1
04152 AMPK signaling pathway	1
04216 Ferroptosis	1
04361 Axon regeneration	1
04371 Apelin signaling pathway	1
04530 Tight junction	1
04612 Antigen processing and presentation	1
04710 Circadian rhythm	1
04712 Circadian rhythm - plant	1
04724 Glutamatergic synapse	1
04921 Oxytocin signaling pathway	1
04930 Type II diabetes mellitus	1
04931 Insulin resistance	1
04934 Cushing syndrome	1
04973 Carbohydrate digestion and absorption	1
05012 Parkinson disease	1
05016 Huntington disease	1
05017 Spinocerebellar ataxia	1
05020 Prion disease	1
05130 Pathogenic Escherichia coli infection	1
05131 Shigellosis	1
05132 Salmonella infection	1
05152 Tuberculosis	1
05162 Measles	1
05164 Influenza A	1
05166 Human T-cell leukemia virus 1 infection	1
05200 Pathways in cancer	1
05225 Hepatocellular carcinoma	1
05410 Hypertrophic cardiomyopathy	1

## Sheet: Sheet1
KO	Definition			NOL, NYC1; chlorophyll(ide) b reductase [EC:1.1.1.294]	2
K00430	E1.11.1.7; peroxidase [EC:1.11.1.7]	14		bchM, chlM; magnesium-protoporphyrin O-methyltransferase [EC:2.1.1.11]	1
K09286	EREBP; EREBP-like factor (APETALA2/ethylene-responsive element binding protein (AP2/EREBP) transcription factors)	14		LHCB1; light-harvesting complex II chlorophyll a/b binding protein 1	1
K01183	E3.2.1.14; chitinase [EC:3.2.1.14]	9		SGR, SGRL; magnesium dechelatase [EC:4.99.1.10]	1
K14638	SLC15A3_4, PHT; solute carrier family 15 (peptide/histidine transporter), member 3/4	9
K00826	E2.6.1.42, ilvE; branched-chain amino acid aminotransferase [EC:2.6.1.42]	7
K21483	SAMT; salicylate 1-O-methyltransferase [EC:2.1.1.274]	7
K13065	E2.3.1.133, HCT; shikimate O-hydroxycinnamoyltransferase [EC:2.3.1.133]	6
K24028	DMR6, DLO; salicylic acid 3-hydroxylase [EC:1.14.11.-]	6
K00128	ALDH; aldehyde dehydrogenase (NAD+) [EC:1.2.1.3]	5
K00235	SDHB, SDH2; succinate dehydrogenase (ubiquinone) iron-sulfur subunit [EC:1.3.5.1]	5
K01897	ACSL, fadD; long-chain acyl-CoA synthetase [EC:6.2.1.3]	5
K03549	kup; KUP system potassium uptake protein	5
K13457	RPM1, RPS3; disease resistance protein RPM1	5
K00799	GST, gst; glutathione S-transferase [EC:2.5.1.18]	4
K01358	clpP, CLPP; ATP-dependent Clp protease, protease subunit [EC:3.4.21.92]	4
K01953	asnB, ASNS; asparagine synthase (glutamine-hydrolysing) [EC:6.3.5.4]	4
K04121	E4.2.3.19; ent-kaurene synthase [EC:4.2.3.19]	4
K08235	E2.4.1.207; xyloglucan:xyloglucosyl transferase [EC:2.4.1.207]	4
K14157	AASS; alpha-aminoadipic semialdehyde synthase [EC:1.5.1.8 1.5.1.9]	4
K20547	CHIB; basic endochitinase B [EC:3.2.1.14]	4
K24193	STP; MFS transporter, SP family, sugar:H+ symporter	4
K00827	AGXT2; alanine-glyoxylate transaminase / (R)-3-amino-2-methylpropionate-pyruvate transaminase [EC:2.6.1.44 2.6.1.40]	3
K01006	ppdK; pyruvate, orthophosphate dikinase [EC:2.7.9.1]	3
K01209	abfA; alpha-L-arabinofuranosidase [EC:3.2.1.55]	3
K01265	map; methionyl aminopeptidase [EC:3.4.11.18]	3
K01637	E4.1.3.1, aceA; isocitrate lyase [EC:4.1.3.1]	3
K01853	CAS1; cycloartenol synthase [EC:5.4.99.8]	3
K02881	RP-L18, MRPL18, rplR; large subunit ribosomal protein L18	3
K03781	katE, CAT, catB, srpA; catalase [EC:1.11.1.6]	3
K04078	groES, HSPE1; chaperonin GroES	3
K06692	PSMD5; 26S proteasome non-ATPase regulatory subunit 5	3
K09422	MYBP; transcription factor MYB, plant	3
K10144	RCHY1, PIRH2; RING finger and CHY zinc finger domain-containing protein 1 [EC:2.3.2.27]	3
K13449	PR1; pathogenesis-related protein 1	3
K14207	SLC38A2, SNAT2; solute carrier family 38 (sodium-coupled neutral amino acid transporter), member 2	3
K14209	SLC36A, PAT; solute carrier family 36 (proton-coupled amino acid transporter)	3
K15397	KCS; 3-ketoacyl-CoA synthase [EC:2.3.1.199]	3
K00012	UGDH, ugd; UDPglucose 6-dehydrogenase [EC:1.1.1.22]	2
K00036	G6PD, zwf; glucose-6-phosphate 1-dehydrogenase [EC:1.1.1.49 1.1.1.363]	2
K00121	frmA, ADH5, adhC; S-(hydroxymethyl)glutathione dehydrogenase / alcohol dehydrogenase [EC:1.1.1.284 1.1.1.1]	2
K00306	PIPOX; sarcosine oxidase / L-pipecolate oxidase [EC:1.5.3.1 1.5.3.7]	2
K00434	E1.11.1.11; L-ascorbate peroxidase [EC:1.11.1.11]	2
K00469	MIOX; inositol oxygenase [EC:1.13.99.1]	2
K00975	glgC; glucose-1-phosphate adenylyltransferase [EC:2.7.7.27]	2
K01087	otsB; trehalose 6-phosphate phosphatase [EC:3.1.3.12]	2
K01638	aceB, glcB; malate synthase [EC:2.3.3.9]	2
K01649	leuA, IMS; 2-isopropylmalate synthase [EC:2.3.3.13]	2
K01869	LARS, leuS; leucyl-tRNA synthetase [EC:6.1.1.4]	2
K02871	RP-L13, MRPL13, rplM; large subunit ribosomal protein L13	2
K02887	RP-L20, MRPL20, rplT; large subunit ribosomal protein L20	2
K03676	grxC, GLRX, GLRX2; glutaredoxin 3	2
K05282	GA20ox; gibberellin-44 dioxygenase [EC:1.14.11.12]	2
K05929	NMT; phosphoethanolamine N-methyltransferase [EC:2.1.1.103]	2
K06617	E2.4.1.82; raffinose synthase [EC:2.4.1.82]	2
K07025	putative hydrolase of the HAD superfamily	2
K08360	CYB561; cytochrome b-561 [EC:7.2.1.3]	2
K08486	STX1B_2_3; syntaxin 1B/2/3	2
K09287	RAV; RAV-like factor (ETHYLENE RESPONSE DNA BINDING FACTORS)	2
K09458	fabF, OXSM, CEM1; 3-oxoacyl-[acyl-carrier-protein] synthase II [EC:2.3.1.179]	2
K10664	ATL6S; E3 ubiquitin-protein ligase ATL6/9/15/31/42/55 [EC:2.3.2.27]	2
K10775	PAL; phenylalanine ammonia-lyase [EC:4.3.1.24]	2
K12125	ELF3; protein EARLY FLOWERING 3	2
K13424	WRKY33; WRKY transcription factor 33	2
K13448	CML; calcium-binding protein CML	2
K13606	NOL, NYC1; chlorophyll(ide) b reductase [EC:1.1.1.294]	2
K13691	SGT1; pathogen-inducible salicylic acid glucosyltransferase [EC:2.4.1.-]	2
K15382	SLC50A, SWEET; solute carrier family 50 (sugar transporter)	2
K15404	K15404, CER1; aldehyde decarbonylase [EC:4.1.99.5]	2
K17469	SULTR2; sulfate transporter 2, low-affinity	2
K17609	NXN; nucleoredoxin [EC:1.8.1.8]	2
K17991	PXG; peroxygenase [EC:1.11.2.3]	2
K18213	PRORP; proteinaceous RNase P [EC:3.1.26.5]	2
K20624	CYP94C1; 12-hydroxyjasmonoyl-L-amino acid 12-hydroxylase / fatty acid hydroxylase [EC:1.14.14.49]	2
K22139	MPC2; mitochondrial pyruvate carrier 2	2
K22390	ACP7; acid phosphatase type 7	2
K24139	PILS, ECM3; auxin efflux carrier family protein	2
K05658	ABCB1, CD243; ATP-binding cassette, subfamily B (MDR/TAP), member 1 [EC:7.6.2.2]	1
K05658	ABCB1, CD243; ATP-binding cassette, subfamily B (MDR/TAP), member 1 [EC:7.6.2.2]	1
K15015	SLC32A, VGAT; solute carrier family 32 (vesicular inhibitory amino acid transporter)	1
K15015	SLC32A, VGAT; solute carrier family 32 (vesicular inhibitory amino acid transporter)	1
K00006	GPD1; glycerol-3-phosphate dehydrogenase (NAD+) [EC:1.1.1.8]	1
K00016	LDH, ldh; L-lactate dehydrogenase [EC:1.1.1.27]	1
K00083	CAD; cinnamyl-alcohol dehydrogenase [EC:1.1.1.195]	1
K00103	GULO; L-gulonolactone oxidase [EC:1.1.3.8]	1
K00454	LOX2S; lipoxygenase [EC:1.13.11.12]	1
K00627	DLAT, aceF, pdhC; pyruvate dehydrogenase E2 component (dihydrolipoamide acetyltransferase) [EC:2.3.1.12]	1
K00654	SPT; serine palmitoyltransferase [EC:2.3.1.50]	1
K00705	malQ; 4-alpha-glucanotransferase [EC:2.4.1.25]	1
K00787	FDPS; farnesyl diphosphate synthase [EC:2.5.1.1 2.5.1.10]	1
K00831	serC, PSAT1; phosphoserine aminotransferase [EC:2.6.1.52]	1
K00844	HK; hexokinase [EC:2.7.1.1]	1
K00915	IPMK, IPK2; inositol-polyphosphate multikinase [EC:2.7.1.140 2.7.1.151]	1
K01177	E3.2.1.2; beta-amylase [EC:3.2.1.2]	1
K01187	malZ; alpha-glucosidase [EC:3.2.1.20]	1
K01255	CARP, pepA; leucyl aminopeptidase [EC:3.4.11.1]	1
K01408	IDE, ide; insulysin [EC:3.4.24.56]	1
K01611	speD, AMD1; S-adenosylmethionine decarboxylase [EC:4.1.1.50]	1
K01623	ALDO; fructose-bisphosphate aldolase, class I [EC:4.1.2.13]	1
K01662	dxs; 1-deoxy-D-xylulose-5-phosphate synthase [EC:2.2.1.7]	1
K01674	cah; carbonic anhydrase [EC:4.2.1.1]	1
K01681	ACO, acnA; aconitate hydratase [EC:4.2.1.3]	1
K01695	trpA; tryptophan synthase alpha chain [EC:4.2.1.20]	1
K01723	AOS; hydroperoxide dehydratase [EC:4.2.1.92]	1
K01761	E4.4.1.11; methionine-gamma-lyase [EC:4.4.1.11]	1
K01785	galM, GALM; aldose 1-epimerase [EC:5.1.3.3]	1
K01845	hemL; glutamate-1-semialdehyde 2,1-aminomutase [EC:5.4.3.8]	1
K01904	4CL; 4-coumarate--CoA ligase [EC:6.2.1.12]	1
K02639	petF; ferredoxin	1
K02878	RP-L16, MRPL16, rplP; large subunit ribosomal protein L16	1
K02879	RP-L17, MRPL17, rplQ; large subunit ribosomal protein L17	1
K02890	RP-L22, MRPL22, rplV; large subunit ribosomal protein L22	1
K02914	RP-L34, MRPL34, rpmH; large subunit ribosomal protein L34	1
K02931	RP-L5, MRPL5, rplE; large subunit ribosomal protein L5	1
K02935	RP-L7, MRPL12, rplL; large subunit ribosomal protein L7/L12	1
K02939	RP-L9, MRPL9, rplI; large subunit ribosomal protein L9	1
K02982	RP-S3, rpsC; small subunit ribosomal protein S3	1
K03043	rpoB; DNA-directed RNA polymerase subunit beta [EC:2.7.7.6]	1
K03098	APOD; apolipoprotein D and lipocalin family protein	1
K03106	SRP54, ffh; signal recognition particle subunit SRP54 [EC:3.6.5.4]	1
K03216	trmL, cspR; tRNA (cytidine/uridine-2'-O-)-methyltransferase [EC:2.1.1.207]	1
K03320	amt, AMT, MEP; ammonium transporter, Amt family	1
K03428	bchM, chlM; magnesium-protoporphyrin O-methyltransferase [EC:2.1.1.11]	1
K04120	E5.5.1.13; ent-copalyl diphosphate synthase [EC:5.5.1.13]	1
K04123	KAO; ent-kaurenoic acid monooxygenase [EC:1.14.14.107]	1
K04125	GA2ox; gibberellin 2beta-dioxygenase [EC:1.14.11.13]	1
K05350	bglB; beta-glucosidase [EC:3.2.1.21]	1
K05577	ndhF; NAD(P)H-quinone oxidoreductase subunit 5 [EC:7.1.1.2]	1
K05933	E1.14.17.4; aminocyclopropanecarboxylate oxidase [EC:1.14.17.4]	1
K07195	EXOC7, EXO70; exocyst complex component 7	1
K07198	PRKAA, AMPK; 5'-AMP-activated protein kinase, catalytic alpha subunit [EC:2.7.11.11]	1
K07399	resB, ccs1; cytochrome c biogenesis protein	1
K07766	E3.6.1.52; diphosphoinositol-polyphosphate diphosphatase [EC:3.6.1.52]	1
K08064	NFYA, HAP2; nuclear transcription factor Y, alpha	1
K08176	PHO84; MFS transporter, PHS family, inorganic phosphate transporter	1
K08695	ANR; anthocyanidin reductase [EC:1.3.1.77]	1
K08912	LHCB1; light-harvesting complex II chlorophyll a/b binding protein 1	1
K08967	mtnD, mtnZ, ADI1; 1,2-dihydroxy-3-keto-5-methylthiopentene dioxygenase [EC:1.13.11.53 1.13.11.54]	1
K09338	HD-ZIP; homeobox-leucine zipper protein	1
K09419	HSFF; heat shock transcription factor, other eukaryote	1
K09754	CYP98A, C3'H; 5-O-(4-coumaroyl)-D-quinate 3'-monooxygenase [EC:1.14.14.96]	1
K09842	AAO3; abscisic-aldehyde oxidase [EC:1.2.3.14]	1
K09955	uncharacterized protein	1
K10251	HSD17B12, KAR, IFA38; 17beta-estradiol 17-dehydrogenase / very-long-chain 3-oxoacyl-CoA reductase [EC:1.1.1.62 1.1.1.330]	1
K10781	FATB; fatty acyl-ACP thioesterase B [EC:3.1.2.14 3.1.2.21]	1
K11294	NCL, NSR1; nucleolin	1
K11296	HMGB3; high mobility group protein B3	1
K11420	EHMT; [histone H3]-lysine9 N-trimethyltransferase EHMT [EC:2.1.1.355]	1
K11498	CENPE; centromeric protein E	1
K13126	PABPC; polyadenylate-binding protein	1
K13459	RPS2; disease resistance protein RPS2	1
K13464	JAZ; jasmonate ZIM domain-containing protein	1
K14488	SAUR; SAUR family protein (auxin response genes)	1
K14496	PYL; abscisic acid receptor PYR/PYL family	1
K14709	SLC39A1_2_3, ZIP1_2_3; solute carrier family 39 (zinc transporter), member 1/2/3	1
K14963	WDR5, SWD3, CPS30; COMPASS component SWD3	1
K15032	MTERFD; mTERF domain-containing protein, mitochondrial	1
K15414	C1QBP; complement component 1 Q subcomponent-binding protein, mitochondrial	1
K15718	LOX1_5; linoleate 9S-lipoxygenase [EC:1.13.11.58]	1
K15803	GERD; (-)-germacrene D synthase [EC:4.2.3.75]	1
K15891	FLDH; NAD+-dependent farnesol dehydrogenase [EC:1.1.1.354]	1
K16040	ROMT; trans-resveratrol di-O-methyltransferase [EC:2.1.1.240]	1
K16055	TPS; trehalose 6-phosphate synthase/phosphatase [EC:2.4.1.15 3.1.3.12]	1
K16276	BTS; zinc finger protein-like protein	1
K16280	RGLG; E3 ubiquitin-protein ligase RGLG [EC:2.3.2.27]	1
K16281	RHA1; RING-H2 zinc finger protein RHA1	1
K16904	DCTPP1; dCTP diphosphatase [EC:3.6.1.12]	1
K17338	REEP1_2_3_4; receptor expression-enhancing protein 1/2/3/4	1
K17506	PPM1L, PP2CE; protein phosphatase 1L [EC:3.1.3.16]	1
K17756	FAO3; long-chain-alcohol oxidase [EC:1.1.3.20]	1
K18693	DPP1, DPPL, PLPP4_5; diacylglycerol diphosphate phosphatase / phosphatidate phosphatase [EC:3.1.3.81 3.1.3.4]	1
K19761	GGACT; gamma-glutamylaminecyclotransferase [EC:2.3.2.-]	1
K20000	matK; maturase K	1
K20536	MPK3; mitogen-activated protein kinase 3 [EC:2.7.11.24]	1
K20617	CYP71A; cytochrome P450 family 71 subfamily A	1
K20855	B3GALT1S; beta-1,3-galactosyltransferase 1/2/3/4/5/7/8 [EC:2.4.1.-]	1
K20867	GAUT12S; galacturonosyltransferase 12/13/14/15 [EC:2.4.1.-]	1
K21604	IAR3, ILL6; jasmonoyl-L-amino acid hydrolase [EC:3.5.1.127]	1
K21867	AKT, KAT, GORK, SKOR; potassium channel	1
K22013	SGR, SGRL; magnesium dechelatase [EC:4.99.1.10]	1
K22522	LOG; cytokinin riboside 5'-monophosphate phosphoribohydrolase [EC:3.2.2.-]	1
K23094	ABC4, menA; 2-carboxy-1,4-naphthoquinone phytyltransferase [EC:2.5.1.130]	1
K24345	KIC; calcium-binding protein KIC and related proteins	1

## Sheet: Ko00500
00500 Starch and sucrose metabolism (7)
hexokinase [EC:2.7.1.1]	K00844	LOC_Os05g09500.1
glucose-1-phosphate adenylyltransferase [EC:2.7.7.27]	K00975	LOC_Os05g50380.1,LOC_Os05g50380.2
beta-amylase [EC:3.2.1.2]	K01177	LOC_Os10g41550.1
alpha-glucosidase [EC:3.2.1.20]	K01187	LOC_Os06g46340.1
beta-glucosidase [EC:3.2.1.21]	K01188	LOC_Os01g59840.1
beta-glucosidase [EC:3.2.1.21]	K05350	LOC_Os04g43410.1
trehalose 6-phosphate synthase/phosphatase [EC:2.4.1.15 3.1.3.12]	K16055	LOC_Os05g44100.1
00500 Starch and sucrose metabolism (2)
4-alpha-glucanotransferase [EC:2.4.1.25]	K00705	LOC_Os07g43390.1
trehalose 6-phosphate phosphatase [EC:3.1.3.12]	K01087	LOC_Os08g31630.2,LOC_Os08g31630.1

## Sheet: Figure_7
Table s7. KEGG analyses of all significantly differentially expressed genes and genes involved in the starch and sucrose metabolism pathway.
KEGG term	Amino sugar and nucleotide sugar metabolism	Ascorbate and aldarate metabolism	Biosynthesis of amino acids	Biosynthesis of cofactors	Biosynthesis of secondary metabolites	Carbon metabolism	Cysteine and methionine metabolism	Diterpenoid biosynthesis	Fatty acid metabolism	Galactose metabolism	Glutathione metabolism	Glycine, serine and threonine metabolism	Glycolysis / Gluconeogenesis	Glyoxylate and dicarboxylate metabolism	Lysine degradation	MAPK signaling pathway - plant	Metabolic pathways	Microbial metabolism in diverse environments	Phenylpropanoid biosynthesis	Plant hormone signal transduction	Plant-pathogen interaction	Porphyrin and chlorophyll metabolism	Pyruvate metabolism	Ribosome	Starch and sucrose metabolism
Number of DEGs	6	5	7	8	59	12	8	5	4	4	4	4	8	4	4	6	78	15	7	4	7	4	6	11	8
