# Supplementary material for: RNA-Seq, co-expression network and eQTL analysis identify key genes for chlorophyll and carbon metabolism in rice
Source: Research Square preprint supplement (doi:10.21203/rs.3.rs-2517802/v1), 2023-02-08
Supplement: Supplementary file 4 [file 1e7e9115bf291389ecd2b045.xlsx]

## Sheet: Data
Sample	A663	A646	12.25 × A663	2.79 × A646	(12.25 × A663)-(2.679× A646)	Chla		22.5 × A646	5.10 × A663	(22.5 × A646)–(5.10× A663)	Chlb		7.15A663+18.71A647	Total Ch		A470	1000A470-1.82Ca-85.02Cb/198	Car
N22	1.392	0.693	17.052	1.93347	15.1185	15.1185		14.8995	7.0992	7.8003	7.8003		22.9188	22.9188		96.05	96019.1	96019.1
N22	1.117	1.112	13.6832	3.10248	10.5808	10.5808		23.908	5.6967	18.2113	18.2113		28.7921	28.7921		141.4	141373	141373
N22	1.915	1.23	23.4587	3.4317	20.027	20.027		26.445	9.7665	16.6785	16.6785		36.7056	36.7056		156.2	156156	156156
M-507	0.006	0.034	0.0735	0.09486	-0.02136	-0.02136		0.731	0.0306	0.7004	0.7004		0.67904	0.67904		35.14	35139.7	35139.7
M-507	0.078	0.032	0.9555	0.08928	0.86622	0.86622		0.688	0.3978	0.2902	0.2902		1.15642	1.15642		3.024	3022.3	3022.3
M-507	0.089	0.031	1.09025	0.08649	1.00376	1.00376		0.6665	0.4539	0.2126	0.2126		1.21636	1.21636		4.752	4750.08	4750.08

## Sheet: Sheet 1
Sample	Chla	Chlb	Total Chl	Car		Sample	Chla	Chlb	Total Chl	Car		Sample	N22 a	N22 b	N22 c	M-507 a	M-507 b	M-507 c	t-test
N22	15.1185	7.8003	22.9188	96019.1		M-507	-0.02136	0.7004	0.67904	35139.7		Chla	15.1185	10.5808	20.027	-0.02136	0.86622	1.00376	0.00598388
N22	10.5808	18.2113	28.7921	141373		M-507	0.86622	0.2902	1.15642	3022.3		Chlb	7.8003	18.2113	16.6785	0.7004	0.2902	0.2126	0.0130873
N22	20.027	16.6785	36.7056	156156		M-507	1.00376	0.2126	1.21636	4750.08		Total Chl	22.9188	28.7921	36.7056	0.67904	1.15642	1.21636	0.00205966
Mean	15.2421	14.23	29.4721	131183		Mean	0.616207	0.401067	1.01727	14304		Car	96019.1	141373	156156	35139.7	3022.3	4750.08	0.00500266
SD	4.72435	5.62081	6.91847	31336.9		SD	0.556415	0.262118	0.294448	18064.9
SEM	2.72761	3.24517	3.99438	18092.4		SEM	0.321246	0.151334	0.17	10429.8		Chla/b	0.457229
												Chl/Car	0.411713

## Sheet: Figure 3&Table_2
Table s2. Chlorophyll and carotenoid contents in N22 and M-507.
Sample	Chla	Chlb	Total Chl	Car		Sample	Chla	Chlb	Total Chl	Car
N-22	15.24	14.23	29.47	131183		N-22	15.24+2.73	14.23+3.25	29.47+4	131182.81+18092.37
M-507	0.62	0.4	1.02	14304		M-507	0.62+0.32	0.4+0.15	1.02+0.17	14304.04+10429.78
M-507 % to N22	4.06824	2.81096	3.46115	10.9039		Chla/b	0.457229
Chla/b	1.55					Chl/Car	0.411713
Chl/Car	7.13085e-05
