# Supplementary material for: RNA-Seq, co-expression network and eQTL analysis identify key genes for chlorophyll and carbon metabolism in rice
Source: Research Square preprint supplement (doi:10.21203/rs.3.rs-2517802/v1), 2023-02-08
Supplement: Supplementary file 5 [file 28b7f006f315349aa6bd6151.xlsx]

## Sheet: Figure_15
Table s9. List of SNP and Indels.
Gene ID				N22	M-507	M-507/N22	REF	ALT	QUAL
A2J10_07T0273400.1	Putative SNF2 family N-terminal domain containing protein, expressed	Putative SNF2 family N-terminal domain containing protein, expressed	Similar to chromatin remodeling complex subunit.	0.000293	0.305997	1044.36	C	G	21.4455
A2J10_01T0431800.1	starch binding domain containing protein, Putative, expressed	#N/A	#N/A	0.024597	3.21563	130.732	C	T	30.4183
A2J10_05T0112100.1	WRKY53, expressed	#N/A	#N/A	0.10953	12.4304	113.489	G	T	30.4183
A2J10_06T0189100.1	reticuline oxidase-like protein precursor, Putative, expressed	reticuline oxidase-like protein precursor, Putative, expressed	Similar to Nectarin 5 (Fragment).	0.023905	1.62864	68.1298	G	A	30.4183
A2J10_11T0090800.1	DNA-directed RNA polymerase subunit beta, Putative, expressed	#N/A	#N/A	0.009806	0.587371	59.8991	C	T	179
A2J10_11T0090800.1	DNA-directed RNA polymerase subunit beta, Putative, expressed	#N/A	#N/A	0.009806	0.587371	59.8991	C	T	107
A2J10_11T0090800.1	DNA-directed RNA polymerase subunit beta, Putative, expressed	#N/A	#N/A	0.009806	0.587371	59.8991	G	A	225
A2J10_04T0194000.1	glucosyltransferase, Putative, expressed	#N/A	#N/A	0.086602	4.95913	57.2635	C	A	30.4183
A2J10_04T0156400.1	L-allo-threonine aldolase, Putative, expressed	L-allo-threonine aldolase, Putative, expressed	Pyridoxal phosphate-dependent transferase, major region, subdomain 1 domain containing protein.	0.090475	4.8827	53.9674	C	T	30.4183
A2J10_08T0119600.1	expressed protein	#N/A	#N/A	0.002824	0.150295	53.2206	C	A	30.4183
A2J10_07T0196100.1	Conserved hypothetical protein	#N/A	#N/A	0.013478	0.58589	43.4701	C	T	30.4183
A2J10_08T0058200.1	SHR5-receptor-like kinase, Putative, expressed	SHR5-receptor-like kinase, Putative, expressed	Hypothetical conserved gene.	0.534363	21.7323	40.6696	T	C	30.4183
A2J10_07T0286300.1	WRKY47, expressed	WRKY47, expressed	WRKY transcription factor, Drought tolerance	0.131302	4.71047	35.8751	G	A	30.4183
A2J10_07T0286300.1	WRKY47, expressed	WRKY47, expressed	WRKY transcription factor, Drought tolerance	0.131302	4.71047	35.8751	T	A	30.4183
A2J10_07T0286300.1	WRKY47, expressed	WRKY47, expressed	WRKY transcription factor, Drought tolerance	0.131302	4.71047	35.8751	A	T	30.4183
A2J10_08T0175700.1	expressed protein	expressed protein	Conserved hypothetical protein.	0.020314	0.699046	34.412	T	A	30.4183
A2J10_01T0430700.1	hs1, Putative, expressed	#N/A	#N/A	0.241792	6.98627	28.8937	T	A	30.4183
A2J10_04T0188600.1	chitinase 2, Putative, expressed	#N/A	#N/A	0.070687	1.87641	26.5454	C	A	30.4183
A2J10_08T0227600.1	expressed protein	expressed protein	Hypothetical gene.	0.003997	0.104503	26.1454	A	T	30.4183
A2J10_11T0206200.1	expressed protein	#N/A	#N/A	0.022061	0.566444	25.6763	A	T	30.4183
A2J10_03T0112700.2	plant protein of unknown function domain containing protein, expressed	#N/A	#N/A	0.06417	1.64074	25.5686	T	C	30.4183
A2J10_01T0067200.1	expressed protein	expressed protein	Hypothetical conserved gene.	0.005787	0.141555	24.4609	C	A	30.4183
A2J10_03T0379000.2	pentatricopeptide, Putative, expressed	#N/A	#N/A	0.00149	0.036394	24.4255	G	A	30.4183
A2J10_10T0082600.1	photosystem II P680 chlorophyll A apoprotein, Putative, expressed	#N/A	#N/A	0.004196	0.098487	23.4716	G	A	45.772
A2J10_08T0127800.1	calmodulin binding protein, Putative, expressed	#N/A	#N/A	0.06401	1.44741	22.6122	C	A	37.4152
A2J10_11T0072800.1	gibberellin receptor GID1L2, Putative, expressed	#N/A	#N/A	0.069128	1.42397	20.599	C	A	29.4193
A2J10_01T0017300.1	senescence-induced receptor-like serine/threonine-protein kinase precursor, Putative, expressed	protein kinase domain containing protein, expressed	Putative Bowman Birk trypsin inhibitor	0.556152	11.4264	20.5455	A	G	228
A2J10_01T0017300.1	senescence-induced receptor-like serine/threonine-protein kinase precursor, Putative, expressed	protein kinase domain containing protein, expressed	Putative Bowman Birk trypsin inhibitor	0.556152	11.4264	20.5455	T	G	225
A2J10_01T0017300.1	senescence-induced receptor-like serine/threonine-protein kinase precursor, Putative, expressed	protein kinase domain containing protein, expressed	Putative Bowman Birk trypsin inhibitor	0.556152	11.4264	20.5455	T	C	145
A2J10_06T0139600.1	DNA-directed RNA polymerase subunit beta, Putative, expressed	DNA-directed RNA polymerase subunit beta, Putative, expressed	#N/A	12.1189	234.326	19.3356	C	T	70
A2J10_06T0139600.1	DNA-directed RNA polymerase subunit beta, Putative, expressed	DNA-directed RNA polymerase subunit beta, Putative, expressed	#N/A	12.1189	234.326	19.3356	T	A	57
A2J10_06T0139600.1	DNA-directed RNA polymerase subunit beta, Putative, expressed	DNA-directed RNA polymerase subunit beta, Putative, expressed	#N/A	12.1189	234.326	19.3356	G	T	167
A2J10_06T0139600.1	DNA-directed RNA polymerase subunit beta, Putative, expressed	DNA-directed RNA polymerase subunit beta, Putative, expressed	#N/A	12.1189	234.326	19.3356	C	A	64
A2J10_06T0139600.1	DNA-directed RNA polymerase subunit beta, Putative, expressed	DNA-directed RNA polymerase subunit beta, Putative, expressed	#N/A	12.1189	234.326	19.3356	A	G	80
A2J10_06T0139600.1	DNA-directed RNA polymerase subunit beta, Putative, expressed	DNA-directed RNA polymerase subunit beta, Putative, expressed	#N/A	12.1189	234.326	19.3356	A	G	42.4147
A2J10_06T0139600.1	DNA-directed RNA polymerase subunit beta, Putative, expressed	DNA-directed RNA polymerase subunit beta, Putative, expressed	#N/A	12.1189	234.326	19.3356	T	G	38.415
A2J10_10T0082900.1	ribulose bisphosphate carboxylase large chain precursor, Putative, expressed	ribulose bisphosphate carboxylase large chain precursor, Putative, expressed	#N/A	4.54931	86.9956	19.1228	C	T	53
A2J10_01T0079200.3	expressed protein	#N/A	#N/A	0.034881	0.654866	18.7743	G	A	29.4193
A2J10_02T0331200.1	aspartic proteinase nepenthesin-2 precursor, Putative, expressed	aspartic proteinase nepenthesin-2 precursor, Putative, expressed	Hypothetical protein.	0.088021	1.6468	18.7092	T	C	30.4183
A2J10_06T0207900.1	Conserved hypothetical protein	#N/A	#N/A	0.261764	4.49056	17.155	A	G	30.4183
A2J10_02T0032900.1	Putative expressed protein	#N/A	#N/A	0.006562	0.109055	16.6192	C	T	30.4183
A2J10_02T0032900.1	Putative expressed protein	#N/A	#N/A	0.006562	0.109055	16.6192	C	A	30.4183
A2J10_02T0010400.1	expressed protein	#N/A	#N/A	0.092806	1.47412	15.8839	A	G	228
A2J10_02T0010400.1	expressed protein	#N/A	#N/A	0.092806	1.47412	15.8839	T	C	139
A2J10_02T0010400.1	expressed protein	#N/A	#N/A	0.092806	1.47412	15.8839	T	C	119
A2J10_02T0010400.1	expressed protein	#N/A	#N/A	0.092806	1.47412	15.8839	A	G	67
A2J10_02T0010400.1	expressed protein	#N/A	#N/A	0.092806	1.47412	15.8839	T	G	78
A2J10_02T0010400.1	expressed protein	#N/A	#N/A	0.092806	1.47412	15.8839	T	C	62
A2J10_02T0010400.1	expressed protein	#N/A	#N/A	0.092806	1.47412	15.8839	A	C	37.4152
A2J10_07T0279800.1	pentatricopeptide, Putative, expressed	pentatricopeptide, Putative, expressed	Pentatricopeptide repeat domain containing protein.	0.015418	0.243757	15.8099	C	G	30.4183
A2J10_02T0198400.1	Conserved hypothetical protein	#N/A	#N/A	0.067731	1.05959	15.644	A	G	30.4183
A2J10_01T0225100.1	DNA repair protein Rad51, Putative, expressed	#N/A	#N/A	0.030682	0.418679	13.6458	G	A	75
A2J10_07T0232200.1	tetratricopeptide repeat, Putative, expressed	tetratricopeptide repeat, Putative, expressed	Tetratricopeptide-like helical domain containing protein.	0.024324	0.3309	13.6038	T	C	30.4183
A2J10_09T0033200.1	Conserved hypothetical protein	#N/A	#N/A	0.03832	0.518429	13.5289	T	G	21.4455
A2J10_11T0233800.1	Conserved hypothetical protein	#N/A	#N/A	0.011478	0.153418	13.3663	T	C	30.4183
A2J10_05T0121600.1	expressed protein	#N/A	#N/A	0.598309	7.80437	13.044	T	C	30.4183
A2J10_08T0166800.1	plant viral response family protein, Putative, expressed	plant viral response family protein, Putative, expressed	Protein of unknown function DUF716 family protein.	0.020152	0.261654	12.984	G	A	30.4183
A2J10_02T0080400.1	receptor-like protein kinase precursor, Putative, expressed	#N/A	#N/A	0.015716	0.203914	12.9749	G	A	37.4152
A2J10_04T0122800.3	Conserved hypothetical protein	#N/A	#N/A	10.8002	137.747	12.7542	T	C	60
A2J10_07T0257200.1	expressed protein	#N/A	#N/A	0.01886	0.233474	12.3793	C	G	30.4183
A2J10_08T0093600.1	Hypothetical protein	#N/A	#N/A	6.07036	75.071	12.3668	C	T	210
A2J10_08T0093600.1	Hypothetical protein	#N/A	#N/A	6.07036	75.071	12.3668	T	A	80
A2J10_03T0089100.1	PPR repeat domain containing protein, Putative, expressed	#N/A	#N/A	0.002171	0.026285	12.1073	T	C	30.4183
A2J10_06T0063200.1	CXE carboxylesterase, Putative, expressed	CXE carboxylesterase, Putative, expressed	Alpha/beta hydrolase fold-3 domain containing protein.	0.042413	0.496466	11.7055	G	A	30.4183
A2J10_01T0246700.2	pleiotropic drug resistance protein, Putative, expressed	#N/A	#N/A	0.407284	4.72239	11.5948	C	G	30.4183
A2J10_07T0281500.1	AAA-type ATPase family protein, Putative, expressed	#N/A	#N/A	0.868666	10.0427	11.5611	G	T	30.4183
A2J10_03T0203000.1	spotted leaf 11, Putative, expressed	spotted leaf 11, Putative, expressed	Similar to exodeoxyribonuclease V.	0.076952	0.871837	11.3296	T	C	30.4183
A2J10_03T0169400.2	nucleoside-triphosphatase, Putative, expressed	#N/A	#N/A	0.042247	0.472188	11.1768	G	C	30.4183
A2J10_09T0212300.1	Conserved hypothetical protein	#N/A	#N/A	8.60183	96.0224	11.163	G	A	228
A2J10_09T0212300.1	Conserved hypothetical protein	#N/A	#N/A	8.60183	96.0224	11.163	G	A	228
A2J10_09T0212300.1	Conserved hypothetical protein	#N/A	#N/A	8.60183	96.0224	11.163	G	A	174
A2J10_09T0212300.1	Conserved hypothetical protein	#N/A	#N/A	8.60183	96.0224	11.163	G	A	114
A2J10_09T0212300.1	Conserved hypothetical protein	#N/A	#N/A	8.60183	96.0224	11.163	G	A	111
A2J10_09T0212300.1	Conserved hypothetical protein	#N/A	#N/A	8.60183	96.0224	11.163	G	A	38.3429
A2J10_09T0212300.1	Conserved hypothetical protein	#N/A	#N/A	8.60183	96.0224	11.163	T	C	225
A2J10_09T0212300.1	Conserved hypothetical protein	#N/A	#N/A	8.60183	96.0224	11.163	G	A	225
A2J10_04T0109500.1	expressed protein	expressed protein	Homolog of Arabidopsis BIC1 (Blue-light Inhibitor of Cryptochrome 1), Control of blue light-induced leaf sheath elongation, Regulation of epidermal cell elongation	1.30363	14.4746	11.1033	A	G	225
A2J10_04T0091300.1	Conserved hypothetical protein	#N/A	#N/A	2.84111	31.2859	11.0118	G	A	117
A2J10_03T0349900.1	indole-3-glycerol phosphate lyase, chloroplast precursor, Putative, expressed	#N/A	#N/A	0.079485	0.872967	10.9828	G	A	30.4183
A2J10_05T0046200.1	Putative UDP-glucoronosyl and UDP-glucosyl transferase domain containing protein, expressed	hydrolase, alpha/beta fold family domain containing protein, expressed	Conserved hypothetical protein.	0.192308	1.99255	10.3612	G	A	30.4183
A2J10_01T0087800.1	oxidoreductase, short chain dehydrogenase/reductase family domain containing protein, expressed	oxidoreductase, short chain dehydrogenase/reductase family domain containing protein, expressed	Chlorophyll b reductase, Leaf senescence	1.04094	10.5874	10.171	C	A	30.4183
A2J10_10T0082200.1	Conserved hypothetical protein	#N/A	#N/A	0.244554	2.46642	10.0854	C	T	66
A2J10_06T0255200.1	FAD binding domain of DNA photolyase domain containing protein, expressed	FAD binding domain of DNA photolyase domain containing protein, expressed	Similar to Cryptochrome DASH, chloroplastic/mitochondrial.	0.053615	0.529423	9.87453	C	A	63
A2J10_11T0116600.1	PB1 domain containing protein, expressed	#N/A	#N/A	0.755074	7.35435	9.73991	A	G	30.4183
A2J10_08T0052800.1	Putative protein kinase domain containing protein, expressed	#N/A	#N/A	0.107122	1.04295	9.7361	G	A	30.4183
A2J10_12T0002400.1	RING-H2 finger protein, Putative, expressed	LTPL9 - Protease inhibitor/seed storage/LTP family protein precursor, expressed	Similar to Zinc finger, C3HC4 type family protein, expressed.	0.049301	0.467977	9.49224	G	C	30.4183
A2J10_08T0200700.1	AT hook motif domain containing protein, expressed	AT hook motif domain containing protein, expressed	Protein of unknown function DUF296 domain containing protein.	0.564167	5.29089	9.37824	A	G	225
A2J10_02T0146800.1	apoptosis inhibitor 5, Putative, expressed	apoptosis inhibitor 5, Putative, expressed	Putative homolog of antiapoptosis protein Api5 in animal, Regulation of tapetal programmed cell death (PCD) and degeneration during pollen development	0.358697	3.31759	9.249	T	C	30.4183
A2J10_11T0132400.1	Putative expressed protein	#N/A	#N/A	0.075632	0.658433	8.70575	C	T	30.4183
A2J10_10T0058900.1	zinc finger, C3HC4 type domain containing protein, expressed	#N/A	#N/A	0.006069	0.052553	8.65925	T	C	21.4455
A2J10_10T0058900.1	zinc finger, C3HC4 type domain containing protein, expressed	#N/A	#N/A	0.006069	0.052553	8.65925	G	A	21.4455
A2J10_10T0058900.1	zinc finger, C3HC4 type domain containing protein, expressed	#N/A	#N/A	0.006069	0.052553	8.65925	G	A	21.4455
A2J10_01T0241800.1	expressed protein	#N/A	#N/A	0.091741	0.793071	8.64467	G	A	209
A2J10_11T0241300.1	SOR/SNZ family protein, Putative, expressed	SOR/SNZ family protein, Putative, expressed	Similar to PDX1-like protein 4.	0.34739	2.9768	8.56903	A	C	175
A2J10_11T0241300.1	SOR/SNZ family protein, Putative, expressed	SOR/SNZ family protein, Putative, expressed	Similar to PDX1-like protein 4.	0.34739	2.9768	8.56903	G	C	163
A2J10_11T0241300.1	SOR/SNZ family protein, Putative, expressed	SOR/SNZ family protein, Putative, expressed	Similar to PDX1-like protein 4.	0.34739	2.9768	8.56903	G	C	154
A2J10_11T0241300.1	SOR/SNZ family protein, Putative, expressed	SOR/SNZ family protein, Putative, expressed	Similar to PDX1-like protein 4.	0.34739	2.9768	8.56903	G	C	110
A2J10_11T0241300.1	SOR/SNZ family protein, Putative, expressed	SOR/SNZ family protein, Putative, expressed	Similar to PDX1-like protein 4.	0.34739	2.9768	8.56903	G	C	70
A2J10_11T0241300.1	SOR/SNZ family protein, Putative, expressed	SOR/SNZ family protein, Putative, expressed	Similar to PDX1-like protein 4.	0.34739	2.9768	8.56903	G	C	133
A2J10_11T0241300.1	SOR/SNZ family protein, Putative, expressed	SOR/SNZ family protein, Putative, expressed	Similar to PDX1-like protein 4.	0.34739	2.9768	8.56903	C	T	182
A2J10_11T0241300.1	SOR/SNZ family protein, Putative, expressed	SOR/SNZ family protein, Putative, expressed	Similar to PDX1-like protein 4.	0.34739	2.9768	8.56903	G	C	181
A2J10_11T0241300.1	SOR/SNZ family protein, Putative, expressed	SOR/SNZ family protein, Putative, expressed	Similar to PDX1-like protein 4.	0.34739	2.9768	8.56903	C	T	85
A2J10_04T0058300.1	Conserved hypothetical protein	#N/A	#N/A	6.85734	57.0056	8.31307	T	G	124
A2J10_04T0058300.1	Conserved hypothetical protein	#N/A	#N/A	6.85734	57.0056	8.31307	T	C	79
A2J10_04T0058300.1	Conserved hypothetical protein	#N/A	#N/A	6.85734	57.0056	8.31307	G	A	27.348
A2J10_04T0058300.1	Conserved hypothetical protein	#N/A	#N/A	6.85734	57.0056	8.31307	C	G	146
A2J10_09T0212600.1	Conserved hypothetical protein	#N/A	#N/A	17.8736	146.93	8.22046	A	G	225
A2J10_09T0212600.1	Conserved hypothetical protein	#N/A	#N/A	17.8736	146.93	8.22046	T	C	21.4455
A2J10_01T0064900.1	expressed protein	expressed protein	Similar to H0525G02.3 protein.	0.041195	0.338305	8.21228	G	C	30.4183
A2J10_02T0135000.1	expressed protein	expressed protein	Protein of unknown function DUF538 family protein.	0.087542	0.708283	8.09078	A	G	30.4183
A2J10_09T0038300.1	Putative RNA recognition motif containing protein, expressed	RNA recognition motif containing protein, expressed	Similar to RGP-3 (Fragment).	0.313731	2.49319	7.94691	G	T	30.4183
A2J10_05T0100100.1	glycosyl hydrolase family 10 protein, Putative, expressed	#N/A	#N/A	0.093018	0.728611	7.83301	C	A	30.4183
A2J10_10T0137200.1	secretory protein, Putative, expressed	secretory protein, Putative, expressed	Plant Basic Secretory Protein family protein.	0.399504	3.06256	7.66591	T	C	30.4183
A2J10_06T0024900.1	OsFBL27 - F-box domain and LRR containing protein, expressed	#N/A	#N/A	0.319123	2.44274	7.65454	G	T	30.4183
A2J10_03T0185100.1	Conserved hypothetical protein	#N/A	#N/A	0.172103	1.29176	7.50574	A	C	27.5385
A2J10_03T0392900.1	cytochrome c-type biogenesis protein dbsD-like, Putative, expressed	#N/A	#N/A	0.015118	0.113416	7.50205	A	G	30.4183
A2J10_09T0055000.1	Conserved hypothetical protein	#N/A	#N/A	0.241704	1.77376	7.33858	C	T	214
A2J10_05T0091700.1	Conserved hypothetical protein	#N/A	#N/A	0.036271	0.264819	7.30112	C	T	30.4183
A2J10_02T0219900.2	Putative expressed protein	#N/A	#N/A	0.043646	0.315239	7.22263	G	A	30.4183
A2J10_09T0146500.1	gibberellin receptor GID1L2, Putative, expressed	gibberellin receptor GID1L2, Putative, expressed	Alpha/beta hydrolase fold-3 domain containing protein.	0.063376	0.454281	7.16803	G	T	30.4183
A2J10_03T0117000.1	SNF1-related protein kinase regulatory subunit beta-1, Putative, expressed	SNF1-related protein kinase regulatory subunit beta-1, Putative, expressed	Similar to SNF1-related protein kinase regulatory subunit beta-1.	1.68687	11.9526	7.08566	C	T	215
A2J10_03T0292500.1	CAMK_KIN1/SNF1/Nim1_like.18 - CAMK includes calcium/calmodulin depedent protein kinases, expressed	#N/A	#N/A	0.084207	0.595802	7.07545	T	C	225
A2J10_03T0292500.1	CAMK_KIN1/SNF1/Nim1_like.18 - CAMK includes calcium/calmodulin depedent protein kinases, expressed	#N/A	#N/A	0.084207	0.595802	7.07545	A	C	57
A2J10_03T0292500.1	CAMK_KIN1/SNF1/Nim1_like.18 - CAMK includes calcium/calmodulin depedent protein kinases, expressed	#N/A	#N/A	0.084207	0.595802	7.07545	T	C	221
A2J10_07T0068800.1	metal cation transporter, Putative, expressed	metal cation transporter, Putative, expressed	Zinc transporter, Zn uptake and distribution	0.283798	1.98643	6.99945	C	T	30.4183
A2J10_04T0246700.1	wound induced protein, Putative, expressed	#N/A	#N/A	1.52069	10.4614	6.87941	G	A	30.4183
A2J10_10T0143200.1	E2F-related protein, Putative, expressed	#N/A	#N/A	0.010476	0.071543	6.82923	G	T	30.4183
A2J10_06T0063500.1	DUF1645 domain containing protein, Putative, expressed	DUF1645 domain containing protein, Putative, expressed	Hypothetical protein.	0.23927	1.63138	6.81816	A	G	30.4183
A2J10_03T0215100.1	MATE efflux family protein, Putative, expressed	MATE efflux family protein, Putative, expressed	Multi antimicrobial extrusion protein MatE family protein.	0.31242	2.12417	6.79907	G	A	30.4183
A2J10_05T0124200.1	Leucine Rich Repeat family protein, expressed	Leucine Rich Repeat family protein, expressed	Hypothetical conserved gene.	0.010773	0.07245	6.72515	A	C	30.4183
A2J10_04T0193300.1	pre-mRNA-processing factor 31, Putative, expressed	pre-mRNA-processing factor 31, Putative, expressed	#N/A	0.046616	0.312759	6.70926	G	A	30.4183
A2J10_05T0110700.1	saposin-like type B, region 1 family protein, Putative, expressed	#N/A	#N/A	0.277845	1.85429	6.67384	A	G	67
A2J10_02T0307200.1	Core histone H2A/H2B/H3/H4 domain containing protein, Putative, expressed	#N/A	#N/A	0.099485	0.66077	6.64191	G	A	30.4183
A2J10_03T0324500.1	26S proteasome non-ATPase regulatory subunit 10, Putative, expressed	#N/A	#N/A	0.020129	0.129637	6.44031	C	T	225
A2J10_03T0324500.1	26S proteasome non-ATPase regulatory subunit 10, Putative, expressed	#N/A	#N/A	0.020129	0.129637	6.44031	A	G	79
A2J10_05T0110700.2	transposon protein, Putative, CACTA, En/Spm sub-class, expressed	#N/A	#N/A	0.239871	1.53233	6.38814	T	C	60
A2J10_07T0031100.1	expressed protein	expressed protein	#N/A	0.110988	0.707974	6.37883	G	A	30.4183
A2J10_01T0115500.1	serpin domain containing protein, Putative, expressed	serpin domain containing protein, Putative, expressed	Hypothetical conserved gene.	0.041025	0.258111	6.29155	G	T	30.4183
A2J10_12T0072700.1	T-complex protein, Putative, expressed	T-complex protein, Putative, expressed	Plastid chaperonin 60 alpha subunit, Folding of Rubisco large subunit (rbcL), Seedling development	3.85781	24.1631	6.26343	C	T	30.4183
A2J10_12T0072700.1	T-complex protein, Putative, expressed	T-complex protein, Putative, expressed	Plastid chaperonin 60 alpha subunit, Folding of Rubisco large subunit (rbcL), Seedling development	3.85781	24.1631	6.26343	G	A	30.4183
A2J10_05T0196900.1	ribosomal protein L4, Putative, expressed	ribosomal protein L4, Putative, expressed	Similar to 50S ribosomal protein L4, chloroplast precursor (R-protein L4).	0.982713	6.10547	6.21287	C	G	30.4183
A2J10_06T0002200.1	integral membrane protein, Putative, expressed	integral membrane protein, Putative, expressed	Protein of unknown function DUF125, transmembrane family protein.	0.049084	0.30401	6.19367	G	A	225
A2J10_01T0085200.1	S-locus lectin protein kinase family protein, Putative, expressed	S-locus lectin protein kinase family protein, Putative, expressed	Curculin-like (mannose-binding) lectin domain containing protein.	0.13046	0.804406	6.16592	G	T	30.4183
A2J10_12T0076100.1	expressed protein	expressed protein	Conserved hypothetical protein.	0.09223	0.567041	6.14812	T	G	106
A2J10_12T0034900.1	OsClp10 - Putative Clp protease homologue, expressed	photosystem II P680 chlorophyll A apoprotein, Putative, expressed	#N/A	24.2421	148.773	6.13697	T	G	115
A2J10_12T0034900.1	OsClp10 - Putative Clp protease homologue, expressed	photosystem II P680 chlorophyll A apoprotein, Putative, expressed	#N/A	24.2421	148.773	6.13697	A	C	124
A2J10_12T0034900.1	OsClp10 - Putative Clp protease homologue, expressed	photosystem II P680 chlorophyll A apoprotein, Putative, expressed	#N/A	24.2421	148.773	6.13697	A	G	43.4147
A2J10_08T0210000.2	proteophosphoglycan ppg4, Putative, expressed	#N/A	#N/A	0.025762	0.15809	6.13656	G	A	30.4183
A2J10_03T0071300.1	core histone H2A/H2B/H3/H4, Putative, expressed	#N/A	#N/A	0.002935	0.017964	6.12061	G	C	80
A2J10_03T0165100.1	kinase, Putative, expressed	#N/A	#N/A	1.09696	6.71269	6.11935	G	A	21.4455
A2J10_06T0294900.1	expressed protein	expressed protein	UV radiation resistance protein/autophagy-related protein 14 domain containing protein.	0.367687	2.23896	6.08931	C	T	225
A2J10_02T0065500.1	amino acid transporter, Putative, expressed	#N/A	#N/A	1.39106	8.45281	6.07653	C	T	225
A2J10_11T0131100.1	NB-ARC domain containing protein, expressed	#N/A	#N/A	0.039758	0.24097	6.06092	G	A	106
A2J10_11T0131100.1	NB-ARC domain containing protein, expressed	#N/A	#N/A	0.039758	0.24097	6.06092	C	T	30.4183
A2J10_11T0131100.1	NB-ARC domain containing protein, expressed	#N/A	#N/A	0.039758	0.24097	6.06092	A	G	30.4183
A2J10_04T0221500.1	seed specific protein Bn15D1B, Putative, expressed	seed specific protein Bn15D1B, Putative, expressed	Similar to OSJNba0093F12.14 protein.	3.5399	21.1511	5.97504	G	A	225
A2J10_04T0221500.1	seed specific protein Bn15D1B, Putative, expressed	seed specific protein Bn15D1B, Putative, expressed	Similar to OSJNba0093F12.14 protein.	3.5399	21.1511	5.97504	G	T	222
A2J10_04T0221500.1	seed specific protein Bn15D1B, Putative, expressed	seed specific protein Bn15D1B, Putative, expressed	Similar to OSJNba0093F12.14 protein.	3.5399	21.1511	5.97504	G	A	148
A2J10_04T0221500.1	seed specific protein Bn15D1B, Putative, expressed	seed specific protein Bn15D1B, Putative, expressed	Similar to OSJNba0093F12.14 protein.	3.5399	21.1511	5.97504	T	C	122
A2J10_04T0221500.1	seed specific protein Bn15D1B, Putative, expressed	seed specific protein Bn15D1B, Putative, expressed	Similar to OSJNba0093F12.14 protein.	3.5399	21.1511	5.97504	G	A	122
A2J10_04T0221500.1	seed specific protein Bn15D1B, Putative, expressed	seed specific protein Bn15D1B, Putative, expressed	Similar to OSJNba0093F12.14 protein.	3.5399	21.1511	5.97504	G	T	119
A2J10_04T0221500.1	seed specific protein Bn15D1B, Putative, expressed	seed specific protein Bn15D1B, Putative, expressed	Similar to OSJNba0093F12.14 protein.	3.5399	21.1511	5.97504	A	T	107
A2J10_04T0221500.1	seed specific protein Bn15D1B, Putative, expressed	seed specific protein Bn15D1B, Putative, expressed	Similar to OSJNba0093F12.14 protein.	3.5399	21.1511	5.97504	G	A	86
A2J10_04T0221500.1	seed specific protein Bn15D1B, Putative, expressed	seed specific protein Bn15D1B, Putative, expressed	Similar to OSJNba0093F12.14 protein.	3.5399	21.1511	5.97504	A	G	75
A2J10_04T0221500.1	seed specific protein Bn15D1B, Putative, expressed	seed specific protein Bn15D1B, Putative, expressed	Similar to OSJNba0093F12.14 protein.	3.5399	21.1511	5.97504	G	A	28.4205
A2J10_04T0221500.1	seed specific protein Bn15D1B, Putative, expressed	seed specific protein Bn15D1B, Putative, expressed	Similar to OSJNba0093F12.14 protein.	3.5399	21.1511	5.97504	G	A	80
A2J10_04T0221500.1	seed specific protein Bn15D1B, Putative, expressed	seed specific protein Bn15D1B, Putative, expressed	Similar to OSJNba0093F12.14 protein.	3.5399	21.1511	5.97504	G	A	46.4146
A2J10_04T0221500.1	seed specific protein Bn15D1B, Putative, expressed	seed specific protein Bn15D1B, Putative, expressed	Similar to OSJNba0093F12.14 protein.	3.5399	21.1511	5.97504	C	G	37.4152
A2J10_05T0030100.1	trehalose phosphatase, Putative, expressed	#N/A	Similar to Trehalose-phosphatase family protein.	0.435059	2.56186	5.88854	A	T	37.4152
A2J10_04T0187100.1	ZOS10-04 - C2H2 zinc finger protein, expressed	ZOS10-04 - C2H2 zinc finger protein, expressed	Cys2/His2-type zinc finger transcription factor, Heading date	0.042425	0.248949	5.86798	G	T	30.4183
A2J10_03T0160000.1	expressed protein	#N/A	#N/A	0.256804	1.49741	5.83094	G	A	30.4183
A2J10_03T0342900.1	Conserved hypothetical protein	Conserved hypothetical protein	Hypothetical conserved gene.	0.642465	3.74451	5.82835	G	A	30.4183
A2J10_03T0303900.1	PPR repeat containing protein, expressed	PPR repeat containing protein, expressed	Nucleolus-localized P-family pentatricopeptide repeat (PPR) protein, Regulation of expression levels and splicing of mitochondrial genome-encoded genes, Starch biosynthesis and seed vigor	0.016868	0.098238	5.82393	G	T	30.4183
A2J10_11T0158500.1	TKL_IRAK_DUF26-lc.29 - DUF26 kinases have homology to DUF26 containing loci, expressed	#N/A	#N/A	0.108168	0.629452	5.81921	C	A	21.4455
A2J10_01T0070700.1	expressed protein	#N/A	#N/A	91.8419	534.384	5.81852	G	T	30.4183
A2J10_06T0120300.1	OsCttP3 - Putative C-terminal processing peptidase homologue, expressed	Zinc finger C-x8-C-x5-C-x3-H type domain containing protein, expressed	Makorin RING finger protein, Pattern formation and organogenesis during embryogenesis and post-embryogenesis	0.068517	0.395795	5.7766	G	T	30.4183
A2J10_01T0267500.1	Conserved hypothetical protein	#N/A	#N/A	22.8435	129.634	5.6749	C	T	215
A2J10_01T0267500.1	Conserved hypothetical protein	#N/A	#N/A	22.8435	129.634	5.6749	C	T	198
A2J10_01T0267500.1	Conserved hypothetical protein	#N/A	#N/A	22.8435	129.634	5.6749	C	T	184
A2J10_01T0267500.1	Conserved hypothetical protein	#N/A	#N/A	22.8435	129.634	5.6749	A	G	130
A2J10_01T0267500.1	Conserved hypothetical protein	#N/A	#N/A	22.8435	129.634	5.6749	C	T	130
A2J10_01T0267500.1	Conserved hypothetical protein	#N/A	#N/A	22.8435	129.634	5.6749	A	T	128
A2J10_01T0267500.1	Conserved hypothetical protein	#N/A	#N/A	22.8435	129.634	5.6749	T	C	124
A2J10_12T0009800.1	DNA repair protein Rad51, Putative, expressed	DNA repair protein Rad51, Putative, expressed	Meiosis-specific DNA recombinase, Synaptonemal complex (SC) assembly	0.195072	1.10384	5.65863	G	A	130
A2J10_12T0009800.1	DNA repair protein Rad51, Putative, expressed	DNA repair protein Rad51, Putative, expressed	Meiosis-specific DNA recombinase, Synaptonemal complex (SC) assembly	0.195072	1.10384	5.65863	T	G	130
A2J10_12T0009800.1	DNA repair protein Rad51, Putative, expressed	DNA repair protein Rad51, Putative, expressed	Meiosis-specific DNA recombinase, Synaptonemal complex (SC) assembly	0.195072	1.10384	5.65863	G	A	30.4183
A2J10_05T0039500.1	receptor-like protein kinase 2 precursor, Putative, expressed	#N/A	Serine/threonine protein kinase domain containing protein.	0.020262	0.113201	5.58686	C	T	30.4183
A2J10_02T0419700.1	expressed protein	expressed protein	Similar to binding.	0.010181	0.05621	5.52107	G	T	30.4183
A2J10_02T0419700.1	expressed protein	expressed protein	Similar to binding.	0.010181	0.05621	5.52107	C	T	30.4183
A2J10_11T0066000.1	CIP111, Putative, expressed	CIP111, Putative, expressed	Similar to ATPase, AAA family protein, expressed.	0.044098	0.242121	5.49052	C	G	30.4183
A2J10_05T0008900.1	Putative OsFBX343 - F-box domain containing protein, expressed	OsFBX343 - F-box domain containing protein, expressed	Cyclin-like F-box domain containing protein.	0.052866	0.290054	5.48659	C	T	30.4183
A2J10_06T0165100.1	expressed protein	expressed protein	Similar to Chlorophyll a-b binding protein 2, chloroplastic.	1.14782	6.25728	5.45145	C	G	30.4183
A2J10_03T0225100.1	DnaK family protein, Putative, expressed	#N/A	#N/A	0.028904	0.154837	5.35694	G	A	44.4146
A2J10_03T0383700.1	Conserved hypothetical protein	#N/A	#N/A	0.000566	0.003023	5.34099	G	T	21.4455
A2J10_04T0026100.1	amidase, Putative, expressed	amidase, Putative, expressed	Hypothetical protein.	0.049451	0.262167	5.30155	C	T	30.4183
A2J10_03T0128800.1	expressed protein	#N/A	#N/A	0.071476	0.376317	5.26494	G	A	30.4183
A2J10_05T0268500.1	HCF152, Putative, expressed	#N/A	#N/A	0.321182	1.68847	5.25706	A	C	30.4183
A2J10_06T0209800.1	Putative expressed protein	#N/A	#N/A	0.149333	0.77892	5.21599	C	T	30.4183
A2J10_11T0033200.1	transposon protein, Putative, Mutator sub-class, expressed	transposon protein, Putative, Mutator sub-class, expressed	Hypothetical protein.	0.135164	0.70455	5.21256	G	T	30.4183
A2J10_11T0033200.1	transposon protein, Putative, Mutator sub-class, expressed	transposon protein, Putative, Mutator sub-class, expressed	Hypothetical protein.	0.135164	0.70455	5.21256	T	C	24.4299
A2J10_08T0194200.1	Conserved hypothetical protein	citrate transporter, Putative, expressed	Hypothetical protein.	0.180025	0.936648	5.20288	G	A	30.4183
A2J10_04T0095800.1	expressed protein	#N/A	#N/A	0.01609	0.083713	5.2028	C	T	30.4183
A2J10_01T0439700.1	RNA recognition motif containing protein, Putative, expressed	#N/A	#N/A	0.433324	2.23512	5.15808	G	T	30.4183
A2J10_11T0025200.1	anthocyanin 5-O-glucosyltransferase, Putative, expressed	UDP-glucoronosyl and UDP-glucosyl transferase domain containing protein, expressed	UDP-glucuronosyl/UDP-glucosyltransferase family protein.	2.22713	11.3816	5.11042	C	A	30.4183
A2J10_07T0017700.1	lectin-like receptor kinase 7, Putative, expressed	lectin-like receptor kinase 7, Putative, expressed	Similar to Resistance protein candidate (Fragment).	0.109222	0.551626	5.0505	C	G	30.4183
A2J10_06T0027900.1	expressed protein	expressed protein	Sulfotransferase domain containing protein.	0.057378	0.289363	5.0431	A	T	30.4183
A2J10_08T0129300.1	pentatricopeptide repeat domain containing protein, Putative, expressed	pentatricopeptide repeat domain containing protein, Putative, expressed	Pentatricopeptide repeat domain containing protein.	0.018009	0.088964	4.93997	G	T	30.4183
A2J10_04T0109800.1	2Fe-2S iron-sulfur cluster binding domain containing protein, expressed	#N/A	#N/A	0.011774	0.058026	4.92832	G	T	30.4183
A2J10_01T0270500.1	CGMC_MAPKCMGC_2.5 - CGMC includes CDA, MAPK, GSK3, and CLKC kinases, expressed	CGMC_MAPKCMGC_2.5 - CGMC includes CDA, MAPK, GSK3, and CLKC kinases, expressed	Similar to Mitogen-activated protein kinase.	0.073938	0.363648	4.91828	C	A	30.4183
A2J10_01T0242800.1	wound and phytochrome signaling involved receptor like kinase, Putative, expressed	wound and phytochrome signaling involved receptor like kinase, Putative, expressed	Serine/threonine protein kinase domain containing protein.	0.197712	0.967828	4.89514	G	A	30.4183
A2J10_06T0058900.3	homeobox and START domains containing protein, Putative, expressed	#N/A	#N/A	0.038561	0.185647	4.81437	G	T	30.4183
A2J10_06T0058900.3	homeobox and START domains containing protein, Putative, expressed	#N/A	#N/A	0.038561	0.185647	4.81437	T	C	30.4183
A2J10_02T0068100.1	tubulin binding cofactor C, Putative, expressed	#N/A	#N/A	0.011498	0.0553	4.80953	G	T	30.4183
A2J10_08T0002700.1	2Fe-2S iron-sulfur cluster binding domain containing protein, expressed	#N/A	#N/A	63.6846	303.271	4.76208	A	G	30.4183
A2J10_02T0150400.1	AML1, Putative, expressed	AML1, Putative, expressed	Nucleotide-binding, alpha-beta plait domain containing protein.	0.012181	0.057953	4.75766	G	T	30.4183
A2J10_03T0109700.1	Putative expressed protein	#N/A	#N/A	16.6124	78.8073	4.74389	T	C	228
A2J10_03T0109700.1	Putative expressed protein	#N/A	#N/A	16.6124	78.8073	4.74389	C	T	180
A2J10_03T0109700.1	Putative expressed protein	#N/A	#N/A	16.6124	78.8073	4.74389	T	C	67
A2J10_03T0109700.1	Putative expressed protein	#N/A	#N/A	16.6124	78.8073	4.74389	A	G	225
A2J10_03T0109700.1	Putative expressed protein	#N/A	#N/A	16.6124	78.8073	4.74389	A	G	225
A2J10_03T0109700.1	Putative expressed protein	#N/A	#N/A	16.6124	78.8073	4.74389	A	G	225
A2J10_03T0109700.1	Putative expressed protein	#N/A	#N/A	16.6124	78.8073	4.74389	A	G	182
A2J10_01T0053200.1	flavonol-3-O-glycoside-7-O-glucosyltransferase 1, Putative, expressed	flavonol-3-O-glycoside-7-O-glucosyltransferase 1, Putative, expressed	UDP-glucuronosyl/UDP-glucosyltransferase family protein.	0.134969	0.631805	4.68111	C	T	30.4183
A2J10_09T0179000.1	Conserved hypothetical protein	#N/A	#N/A	10.0752	47.1423	4.67905	C	T	226
A2J10_09T0179000.1	Conserved hypothetical protein	#N/A	#N/A	10.0752	47.1423	4.67905	T	C	225
A2J10_09T0179000.1	Conserved hypothetical protein	#N/A	#N/A	10.0752	47.1423	4.67905	T	C	225
A2J10_09T0179000.1	Conserved hypothetical protein	#N/A	#N/A	10.0752	47.1423	4.67905	A	G	204
A2J10_09T0179000.1	Conserved hypothetical protein	#N/A	#N/A	10.0752	47.1423	4.67905	T	C	100
A2J10_09T0179000.1	Conserved hypothetical protein	#N/A	#N/A	10.0752	47.1423	4.67905	G	A	225
A2J10_09T0179000.1	Conserved hypothetical protein	#N/A	#N/A	10.0752	47.1423	4.67905	T	G	225
A2J10_09T0179000.1	Conserved hypothetical protein	#N/A	#N/A	10.0752	47.1423	4.67905	T	C	215
A2J10_09T0179000.1	Conserved hypothetical protein	#N/A	#N/A	10.0752	47.1423	4.67905	G	A	83
A2J10_10T0041100.1	Conserved hypothetical protein	alanyl-tRNA synthetase, Putative, expressed	Similar to Alanyl-tRNA synthetase, mitochondrial precursor (EC 6.1.1.7) (Alanine--tRNA ligase) (AlaRS).	0.052139	0.243846	4.67684	A	T	30.4183
A2J10_01T0073200.1	receptor-like protein kinase, Putative, expressed	Putative D-mannose binding lectin family protein, expressed	#N/A	0.060921	0.282943	4.64442	C	A	30.4183
A2J10_08T0124700.1	cytochrome b561, Putative, expressed	cytochrome b561, Putative, expressed	Cytochrome b561 family protein.	0.423266	1.96416	4.6405	A	T	30.4183
A2J10_06T0224600.1	aspartic proteinase, Putative, expressed	aspartic proteinase, Putative, expressed	Peptidase A1 domain containing protein.	0.284868	1.31821	4.62744	A	T	30.4183
A2J10_09T0160400.1	glutamate receptor precursor, Putative, expressed	#N/A	Similar to Glutamate receptor.	0.159846	0.734187	4.59309	A	G	141
A2J10_09T0160400.1	glutamate receptor precursor, Putative, expressed	#N/A	Similar to Glutamate receptor.	0.159846	0.734187	4.59309	A	G	83
A2J10_09T0160400.1	glutamate receptor precursor, Putative, expressed	#N/A	Similar to Glutamate receptor.	0.159846	0.734187	4.59309	A	C	62
A2J10_04T0158600.1	aquaporin protein, Putative, expressed	#N/A	#N/A	0.101065	0.463009	4.5813	G	C	30.4183
A2J10_05T0024200.1	sucrose-phosphatase, Putative, expressed	sucrose-phosphatase, Putative, expressed	#N/A	0.097634	0.441288	4.51982	G	C	106
A2J10_05T0024200.1	sucrose-phosphatase, Putative, expressed	sucrose-phosphatase, Putative, expressed	#N/A	0.097634	0.441288	4.51982	T	G	106
A2J10_12T0045500.1	protein phosphatase 2C, Putative, expressed	protein phosphatase 2C, Putative, expressed	Similar to Protein phosphatase 2C.	0.176698	0.794191	4.49462	A	G	30.4183
A2J10_07T0106000.3	leucine-rich repeat family protein, Putative, expressed	#N/A	#N/A	0.181798	0.809394	4.45216	G	A	83
A2J10_02T0328800.1	expressed protein	expressed protein	Similar to X7 (Fragment).	0.568436	2.51467	4.42384	A	G	30.4183
A2J10_06T0271300.1	LTPL85 - Protease inhibitor/seed storage/LTP family protein precursor, expressed	LTPL85 - Protease inhibitor/seed storage/LTP family protein precursor, expressed	#N/A	0.657363	2.87836	4.37864	T	C	30.4183
A2J10_09T0007700.1	translation initiation factor IF-2, Putative, expressed	translation initiation factor IF-2, Putative, expressed	EF-HAND 1 domain containing protein.	0.187943	0.816951	4.3468	T	C	30.4183
A2J10_06T0089400.1	exo70 exocyst complex subunit family protein, Putative, expressed	Conserved hypothetical protein	#N/A	1.06158	4.56879	4.30377	G	C	30.4183
A2J10_05T0253800.1	DDT, Putative, expressed	#N/A	#N/A	0.007544	0.032462	4.30302	T	C	30.4183
A2J10_08T0203700.4	ZOS8-11 - C2H2 zinc finger protein, expressed	#N/A	#N/A	0.078304	0.33543	4.28369	A	G	30.4183
A2J10_05T0118700.1	zinc finger, C3HC4 type domain containing protein, expressed	zinc finger, C3HC4 type domain containing protein, expressed	Similar to PIT1.	0.251255	1.05383	4.19426	T	C	30.4183
A2J10_08T0067700.1	disease resistance protein RGA3, Putative, expressed	#N/A	#N/A	0.047753	0.198635	4.15963	C	T	30.4183
A2J10_03T0023100.1	Conserved hypothetical protein	Putative expressed protein	Conserved hypothetical protein.	0.153668	0.639167	4.1594	C	T	29.4193
A2J10_03T0014700.1	nascent polypeptide-associated complex subunit alpha, Putative, expressed	NAC domain containing protein, Putative, expressed	#N/A	2.29342	9.53846	4.15906	G	A	30.4183
A2J10_01T0413700.1	disease resistance-responsive family protein, Putative, expressed	disease resistance-responsive family protein, Putative, expressed	#N/A	0.063	0.26175	4.15476	T	C	30.4183
A2J10_09T0165200.1	expressed protein	#N/A	#N/A	0.085443	0.354055	4.14376	G	A	30.4183
A2J10_01T0351500.1	3-ketoacyl-CoA synthase 10, Putative, expressed	#N/A	#N/A	1.30682	5.41264	4.14184	G	C	30.4183
A2J10_02T0302200.1	O-acyltransferase, Putative, expressed	#N/A	#N/A	1.50221	6.18688	4.11853	T	C	30.4183
A2J10_12T0065400.1	sex determination protein tasselseed-2, Putative, expressed	sex determination protein tasselseed-2, Putative, expressed	Short-chain alcohol dehydrogenase/reductase, Negative regulation of cell death and resistance to bacterial blight, Positive regulation of resistance to the rice blast pathogen	0.150651	0.619523	4.11231	G	T	30.4183
A2J10_04T0103100.1	POEI20 - Pollen Ole e I allergen and extensin family protein precursor, expressed	POEI20 - Pollen Ole e I allergen and extensin family protein precursor, expressed	Similar to Pollen specific protein C13 precursor.	0.102767	0.417069	4.05839	A	T	44.4146
A2J10_06T0270400.1	external NADH-ubiquinone oxidoreductase 1, mitochondrial precursor, Putative, expressed	#N/A	#N/A	0.90042	3.64433	4.04736	T	C	21.4455
A2J10_01T0021300.1	glycosyl hydrolase, family 31, Putative, expressed	glycosyl hydrolase, family 31, Putative, expressed	Similar to Alpha-xylosidase precursor (Fragment).	0.085526	0.345665	4.04164	G	T	30.4183
A2J10_03T0379900.2	Conserved hypothetical protein	#N/A	#N/A	0.078154	0.314724	4.02697	G	A	30.4183
A2J10_03T0379900.2	Conserved hypothetical protein	#N/A	#N/A	0.078154	0.314724	4.02697	C	A	30.4183
A2J10_02T0316700.1	oxidoreductase, short chain dehydrogenase/reductase family, Putative, expressed	oxidoreductase, short chain dehydrogenase/reductase family, Putative, expressed	NAD(P)-binding domain containing protein.	0.437975	1.76123	4.02129	G	A	30.4183
A2J10_05T0019700.1	WRKY5, expressed	WRKY5, expressed	WRKY transcription factor, Positive regulator of leaf senescence	0.248887	0.995102	3.99821	C	A	30.4183
A2J10_11T0226200.1	polygalacturonase, Putative, expressed	#N/A	#N/A	0.617574	2.45103	3.9688	C	A	30.4183
A2J10_03T0388800.1	glycosyl hydrolases family 16, Putative, expressed	glycosyl hydrolases family 16, Putative, expressed	Concanavalin A-like lectin/glucanase domain containing protein.	0.287752	1.12671	3.91556	G	A	74
A2J10_04T0091200.1	Conserved hypothetical protein	#N/A	#N/A	3.48622	13.6215	3.90723	G	A	169
A2J10_04T0091200.1	Conserved hypothetical protein	#N/A	#N/A	3.48622	13.6215	3.90723	G	A	128
A2J10_04T0091200.1	Conserved hypothetical protein	#N/A	#N/A	3.48622	13.6215	3.90723	C	T	127
A2J10_03T0252600.1	cytochrome c biogenesis protein ccsA, Putative, expressed	#N/A	#N/A	6.03429	23.577	3.90717	T	C	46.2381
A2J10_03T0252600.1	cytochrome c biogenesis protein ccsA, Putative, expressed	#N/A	#N/A	6.03429	23.577	3.90717	T	C	27.0731
A2J10_03T0252600.1	cytochrome c biogenesis protein ccsA, Putative, expressed	#N/A	#N/A	6.03429	23.577	3.90717	T	G	169
A2J10_03T0252600.1	cytochrome c biogenesis protein ccsA, Putative, expressed	#N/A	#N/A	6.03429	23.577	3.90717	A	C	62
A2J10_08T0000300.1	acetyltransferase, GNAT family, Putative, expressed	acetyltransferase, GNAT family, Putative, expressed	Serotonin N-acetyltransferase, Melatonin synthesis	0.437535	1.70002	3.88546	C	T	30.4183
A2J10_05T0214500.1	BSD domain containing protein, expressed	BSD domain containing protein, expressed	Similar to BSD domain containing protein.	0.171919	0.659454	3.83584	C	T	80
A2J10_07T0201500.1	lactose permease-related, Putative, expressed	lactose permease-related, Putative, expressed	Major facilitator superfamily, general substrate transporter domain containing protein.	0.523494	1.99553	3.81194	A	G	30.4183
A2J10_08T0234100.1	expressed protein	#N/A	#N/A	0.026787	0.101985	3.80726	G	T	37.4152
A2J10_08T0234100.1	expressed protein	#N/A	#N/A	0.026787	0.101985	3.80726	G	C	37.4152
A2J10_02T0320000.3	bg55, Putative, expressed	#N/A	#N/A	0.173351	0.656629	3.78786	A	T	30.4183
A2J10_06T0123600.1	NADPH-dependent oxidoreductase, Putative, expressed	#N/A	#N/A	4.98218	18.8702	3.78755	T	C	42.1473
A2J10_06T0123600.1	NADPH-dependent oxidoreductase, Putative, expressed	#N/A	#N/A	4.98218	18.8702	3.78755	C	G	116
A2J10_02T0256700.1	receptor-like protein kinase 5 precursor, Putative, expressed	receptor-like protein kinase 5 precursor, Putative, expressed	Protein kinase, core domain containing protein.	0.232104	0.852701	3.67379	T	C	30.4183
A2J10_01T0473200.1	signal peptide peptidase-like 2B, Putative, expressed	signal peptide peptidase-like 2B, Putative, expressed	Peptidase A22B, signal peptide peptidase domain containing protein.	0.095199	0.349064	3.66668	A	G	30.4183
A2J10_02T0284500.1	Conserved hypothetical protein	Conserved hypothetical protein	#N/A	0.004382	0.015982	3.64719	A	G	34.4159
A2J10_11T0212800.2	Leucine Rich Repeat family protein, expressed	#N/A	#N/A	0.108015	0.39289	3.63737	C	G	30.4183
A2J10_02T0041200.1	SCO1 protein homolog, mitochondrial precursor, Putative, expressed	OsFBX38 - F-box domain containing protein, expressed	Similar to electron transport SCO1/SenC family protein.	12.6521	46.0067	3.63629	A	G	91
A2J10_02T0041200.1	SCO1 protein homolog, mitochondrial precursor, Putative, expressed	OsFBX38 - F-box domain containing protein, expressed	Similar to electron transport SCO1/SenC family protein.	12.6521	46.0067	3.63629	G	A	106
A2J10_02T0041200.1	SCO1 protein homolog, mitochondrial precursor, Putative, expressed	OsFBX38 - F-box domain containing protein, expressed	Similar to electron transport SCO1/SenC family protein.	12.6521	46.0067	3.63629	A	T	79
A2J10_08T0128100.1	transporter family protein, Putative, expressed	#N/A	#N/A	0.011363	0.041032	3.61102	A	C	196
A2J10_08T0128100.1	transporter family protein, Putative, expressed	#N/A	#N/A	0.011363	0.041032	3.61102	G	T	84
A2J10_08T0128100.1	transporter family protein, Putative, expressed	#N/A	#N/A	0.011363	0.041032	3.61102	T	C	48.4146
A2J10_01T0012800.1	resistance-related receptor-like kinase, Putative, expressed	resistance-related receptor-like kinase, Putative, expressed	#N/A	0.707395	2.53228	3.57973	G	T	30.4183
A2J10_03T0283300.1	Putative BRCA1 C Terminus domain containing protein, expressed	BRCA1 C Terminus domain containing protein, expressed	BRCT domain containing protein.	1.13284	4.0476	3.57297	T	C	37.4152
A2J10_09T0104900.1	Putative expressed protein	#N/A	#N/A	0.308494	1.09935	3.56361	G	A	21.4455
A2J10_06T0031700.1	OsFBL28 - F-box domain and LRR containing protein, expressed	#N/A	#N/A	1.13055	3.94602	3.49035	G	A	30.4183
A2J10_03T0050800.1	serine acetyltransferase protein, Putative, expressed	#N/A	#N/A	0.284066	0.987116	3.47495	G	A	30.4183
A2J10_04T0307700.1	inactive receptor kinase At2g26730 precursor, Putative, expressed	#N/A	Hypothetical protein.	0.239789	0.826468	3.44665	A	T	30.4183
A2J10_12T0160900.1	Conserved hypothetical protein	#N/A	#N/A	5.11446	17.5719	3.43573	T	C	225
A2J10_12T0160900.1	Conserved hypothetical protein	#N/A	#N/A	5.11446	17.5719	3.43573	T	C	225
A2J10_12T0160900.1	Conserved hypothetical protein	#N/A	#N/A	5.11446	17.5719	3.43573	G	A	147
A2J10_12T0160900.1	Conserved hypothetical protein	#N/A	#N/A	5.11446	17.5719	3.43573	A	G	63
A2J10_12T0160900.1	Conserved hypothetical protein	#N/A	#N/A	5.11446	17.5719	3.43573	C	G	154
A2J10_12T0160900.1	Conserved hypothetical protein	#N/A	#N/A	5.11446	17.5719	3.43573	G	T	154
A2J10_12T0160900.1	Conserved hypothetical protein	#N/A	#N/A	5.11446	17.5719	3.43573	A	C	154
A2J10_12T0160900.1	Conserved hypothetical protein	#N/A	#N/A	5.11446	17.5719	3.43573	G	C	122
A2J10_12T0160900.1	Conserved hypothetical protein	#N/A	#N/A	5.11446	17.5719	3.43573	T	C	80
A2J10_12T0160900.1	Conserved hypothetical protein	#N/A	#N/A	5.11446	17.5719	3.43573	T	C	80
A2J10_12T0160900.1	Conserved hypothetical protein	#N/A	#N/A	5.11446	17.5719	3.43573	T	C	72
A2J10_12T0160900.1	Conserved hypothetical protein	#N/A	#N/A	5.11446	17.5719	3.43573	C	T	37.4152
A2J10_05T0020900.1	OsFBX157 - F-box domain containing protein, expressed	#N/A	#N/A	0.203242	0.69049	3.39738	G	A	37.4152
A2J10_01T0247200.1	Putative BAH domain containing protein, expressed	BAH domain containing protein, expressed	A member of the ASI1-AIPP1-EDM2 (AAE) complex, Rice orthologue of Arabidopsis IBM2 protein, Regulation of rice fertility and flowering time, Mediation of alternative polyadenylation, Control of global poly(A) site usage	0.268968	0.911651	3.38944	T	A	21.4455
A2J10_08T0195100.1	AGC_PVPK_like_CDK8.2 - ACG kinases include homologs to PKA, PKG and PKC, expressed	AGC_PVPK_like_CDK8.2 - ACG kinases include homologs to PKA, PKG and PKC, expressed	Similar to protein kinase.	0.031336	0.105806	3.3765	C	G	30.4183
A2J10_08T0195100.1	AGC_PVPK_like_CDK8.2 - ACG kinases include homologs to PKA, PKG and PKC, expressed	AGC_PVPK_like_CDK8.2 - ACG kinases include homologs to PKA, PKG and PKC, expressed	Similar to protein kinase.	0.031336	0.105806	3.3765	C	T	30.4183
A2J10_02T0281500.1	enoyl-CoA hydratase/isomerase family protein, Putative, expressed	enoyl-CoA hydratase/isomerase family protein, Putative, expressed	Similar to Enoyl-CoA hydratase.	0.04801	0.161175	3.35711	C	T	30.4183
A2J10_04T0291800.1	expressed protein	#N/A	#N/A	0.281279	0.944221	3.35688	C	A	30.4183
A2J10_06T0157200.1	Putative expressed protein	#N/A	#N/A	0.031533	0.105676	3.35128	G	T	30.4183
A2J10_04T0034200.1	vignain precursor, Putative, expressed	vignain precursor, Putative, expressed	Cysteine proteinase.	0.412518	1.36575	3.31076	T	G	194
A2J10_12T0134100.1	2,3-bisphosphoglycerate-independent phosphoglycerate mutase, Putative, expressed	#N/A	#N/A	0.667084	2.2028	3.30213	A	T	225
A2J10_05T0054300.1	serine/threonine-protein kinase receptor precursor, Putative, expressed	serine/threonine-protein kinase receptor precursor, Putative, expressed	S-Domain receptor like kinase-27, Response to submergence	0.181558	0.596131	3.28342	G	T	30.4183
A2J10_06T0153800.4	pyridoxal-dependent decarboxylase protein, Putative, expressed	#N/A	#N/A	2.41504	7.92899	3.28318	G	A	30.4183
A2J10_03T0106000.1	glycosyl transferase 8 domain containing protein, Putative, expressed	glycosyl transferase 8 domain containing protein, Putative, expressed	Similar to Transferase, transferring glycosyl groups.	0.180956	0.592584	3.27474	G	T	30.4183
A2J10_06T0010700.1	high-affinity nickel-transport family protein, Putative, expressed	high-affinity nickel-transport family protein, Putative, expressed	Thylakoid-bound protein, Photoprotection of developing chloroplast during early leaf development	0.306806	1.00417	3.27299	C	A	30.4183
A2J10_09T0035400.1	cytochrome c oxidase subunit 1, Putative, expressed	ELF protein, expressed	#N/A	204.207	663.943	3.25132	A	C	228
A2J10_09T0035400.1	cytochrome c oxidase subunit 1, Putative, expressed	ELF protein, expressed	#N/A	204.207	663.943	3.25132	C	T	228
A2J10_09T0035400.1	cytochrome c oxidase subunit 1, Putative, expressed	ELF protein, expressed	#N/A	204.207	663.943	3.25132	C	T	228
A2J10_09T0035400.1	cytochrome c oxidase subunit 1, Putative, expressed	ELF protein, expressed	#N/A	204.207	663.943	3.25132	C	T	228
A2J10_09T0035400.1	cytochrome c oxidase subunit 1, Putative, expressed	ELF protein, expressed	#N/A	204.207	663.943	3.25132	C	T	228
A2J10_09T0035400.1	cytochrome c oxidase subunit 1, Putative, expressed	ELF protein, expressed	#N/A	204.207	663.943	3.25132	G	A	228
A2J10_09T0035400.1	cytochrome c oxidase subunit 1, Putative, expressed	ELF protein, expressed	#N/A	204.207	663.943	3.25132	G	A	132
A2J10_09T0035400.1	cytochrome c oxidase subunit 1, Putative, expressed	ELF protein, expressed	#N/A	204.207	663.943	3.25132	A	G	225
A2J10_09T0035400.1	cytochrome c oxidase subunit 1, Putative, expressed	ELF protein, expressed	#N/A	204.207	663.943	3.25132	A	G	225
A2J10_09T0035400.1	cytochrome c oxidase subunit 1, Putative, expressed	ELF protein, expressed	#N/A	204.207	663.943	3.25132	A	G	225
A2J10_09T0035400.1	cytochrome c oxidase subunit 1, Putative, expressed	ELF protein, expressed	#N/A	204.207	663.943	3.25132	A	G	225
A2J10_09T0035400.1	cytochrome c oxidase subunit 1, Putative, expressed	ELF protein, expressed	#N/A	204.207	663.943	3.25132	A	G	225
A2J10_09T0035400.1	cytochrome c oxidase subunit 1, Putative, expressed	ELF protein, expressed	#N/A	204.207	663.943	3.25132	T	G	225
A2J10_09T0035400.1	cytochrome c oxidase subunit 1, Putative, expressed	ELF protein, expressed	#N/A	204.207	663.943	3.25132	T	A	225
A2J10_09T0035400.1	cytochrome c oxidase subunit 1, Putative, expressed	ELF protein, expressed	#N/A	204.207	663.943	3.25132	C	G	225
A2J10_09T0035400.1	cytochrome c oxidase subunit 1, Putative, expressed	ELF protein, expressed	#N/A	204.207	663.943	3.25132	G	A	225
A2J10_09T0035400.1	cytochrome c oxidase subunit 1, Putative, expressed	ELF protein, expressed	#N/A	204.207	663.943	3.25132	C	T	225
A2J10_09T0035400.1	cytochrome c oxidase subunit 1, Putative, expressed	ELF protein, expressed	#N/A	204.207	663.943	3.25132	A	G	225
A2J10_09T0035400.1	cytochrome c oxidase subunit 1, Putative, expressed	ELF protein, expressed	#N/A	204.207	663.943	3.25132	T	C	225
A2J10_09T0035400.1	cytochrome c oxidase subunit 1, Putative, expressed	ELF protein, expressed	#N/A	204.207	663.943	3.25132	C	T	225
A2J10_09T0035400.1	cytochrome c oxidase subunit 1, Putative, expressed	ELF protein, expressed	#N/A	204.207	663.943	3.25132	G	C	97
A2J10_01T0417800.1	Putative WRKY56, expressed	Putative WRKY56, expressed	Similar to WRKY transcription factor 56.	0.067396	0.218485	3.24181	A	G	30.4183
A2J10_05T0221600.1	NADH-ubiquinone oxidoreductase chain 4, Putative, expressed	#N/A	#N/A	30.9079	99.6558	3.22429	A	G	165
A2J10_06T0228300.1	phosphoribosyl transferase, Putative, expressed	phosphoribosyl transferase, Putative, expressed	Ribose-phosphate pyrophosphokinase 2 (EC 2.7.6.1) (Phosphoribosyl pyrophosphate synthetase 2). Splice isoform 1.	2.49262	7.94143	3.18598	C	A	80
A2J10_06T0228300.1	phosphoribosyl transferase, Putative, expressed	phosphoribosyl transferase, Putative, expressed	Ribose-phosphate pyrophosphokinase 2 (EC 2.7.6.1) (Phosphoribosyl pyrophosphate synthetase 2). Splice isoform 1.	2.49262	7.94143	3.18598	G	A	80
A2J10_06T0228300.1	phosphoribosyl transferase, Putative, expressed	phosphoribosyl transferase, Putative, expressed	Ribose-phosphate pyrophosphokinase 2 (EC 2.7.6.1) (Phosphoribosyl pyrophosphate synthetase 2). Splice isoform 1.	2.49262	7.94143	3.18598	A	G	37.4152
A2J10_04T0060500.1	Hypothetical protein	#N/A	#N/A	0.76938	2.45052	3.18506	G	C	206
A2J10_04T0060500.1	Hypothetical protein	#N/A	#N/A	0.76938	2.45052	3.18506	G	C	219
A2J10_04T0060500.1	Hypothetical protein	#N/A	#N/A	0.76938	2.45052	3.18506	A	T	34.4159
A2J10_01T0509700.1	cysteine synthase, mitochondrial precursor, Putative, expressed	#N/A	#N/A	0.242446	0.771631	3.18269	T	A	30.4183
A2J10_01T0509700.1	cysteine synthase, mitochondrial precursor, Putative, expressed	#N/A	#N/A	0.242446	0.771631	3.18269	C	T	30.4183
A2J10_02T0010200.1	expressed protein	expressed protein	Similar to Phosphorylation regulatory protein HP-10.	0.948875	3.01811	3.18072	G	A	30.4183
A2J10_06T0250300.1	ESP4, Putative, expressed	#N/A	#N/A	0.363772	1.15394	3.17215	T	C	122
A2J10_03T0154200.1	Putative expressed protein	#N/A	#N/A	18.1062	57.296	3.16444	A	G	228
A2J10_03T0154200.1	Putative expressed protein	#N/A	#N/A	18.1062	57.296	3.16444	A	G	225
A2J10_03T0154200.1	Putative expressed protein	#N/A	#N/A	18.1062	57.296	3.16444	A	G	225
A2J10_03T0154200.1	Putative expressed protein	#N/A	#N/A	18.1062	57.296	3.16444	A	G	225
A2J10_03T0154200.1	Putative expressed protein	#N/A	#N/A	18.1062	57.296	3.16444	T	C	225
A2J10_03T0154200.1	Putative expressed protein	#N/A	#N/A	18.1062	57.296	3.16444	A	G	225
A2J10_03T0154200.1	Putative expressed protein	#N/A	#N/A	18.1062	57.296	3.16444	T	C	214
A2J10_03T0154200.1	Putative expressed protein	#N/A	#N/A	18.1062	57.296	3.16444	A	C	189
A2J10_03T0154200.1	Putative expressed protein	#N/A	#N/A	18.1062	57.296	3.16444	A	G	189
A2J10_03T0154200.1	Putative expressed protein	#N/A	#N/A	18.1062	57.296	3.16444	T	C	65
A2J10_03T0154200.1	Putative expressed protein	#N/A	#N/A	18.1062	57.296	3.16444	T	C	141
A2J10_03T0154200.1	Putative expressed protein	#N/A	#N/A	18.1062	57.296	3.16444	A	G	141
A2J10_01T0053600.1	MYB family transcription factor, Putative, expressed	MYB family transcription factor, Putative, expressed	Myb-like DNA-binding domain, SHAQKYF class domain containing protein.	0.089624	0.281879	3.14513	A	G	21.4455
A2J10_01T0437800.1	expressed protein	expressed protein	Similar to F23M19.3.	0.033503	0.10459	3.12181	C	G	45.8804
A2J10_08T0068700.1	FabA-like domain containing protein, expressed	Putative FabA-like domain containing protein, expressed	&beta;-hydroxyacyl-ACP dehydratase, Regulation of fatty acid synthesis, Chloroplast development	0.356914	1.11229	3.1164	T	A	30.4183
A2J10_01T0335800.1	SGS domain containing protein, expressed	SGS domain containing protein, expressed	Heat shock protein, Heat tolerance	0.840901	2.61755	3.11279	C	G	30.4183
A2J10_10T0158700.6	glutathione S-transferase, Putative, expressed	#N/A	#N/A	1.38655	4.30751	3.10663	G	C	31.6257
A2J10_06T0141900.1	Conserved hypothetical protein	#N/A	#N/A	0.592466	1.83903	3.10402	G	T	30.4183
A2J10_06T0141900.1	Conserved hypothetical protein	#N/A	#N/A	0.592466	1.83903	3.10402	G	A	30.4183
A2J10_06T0141900.1	Conserved hypothetical protein	#N/A	#N/A	0.592466	1.83903	3.10402	G	T	30.4183
A2J10_12T0070500.1	Conserved hypothetical protein	senescence-induced receptor-like serine/threonine-protein kinase precursor, Putative, expressed	Similar to predicted protein.	0.138516	0.425342	3.07071	T	C	30.4183
A2J10_06T0121200.1	Conserved hypothetical protein	#N/A	#N/A	0.037106	0.113584	3.06107	A	T	30.4183
A2J10_12T0166500.1	zinc finger, C3HC4 type domain containing protein, expressed	zinc finger, C3HC4 type domain containing protein, expressed	Similar to Zinc finger, C3HC4 type (RING finger) containing protein.	0.630729	1.91951	3.04332	G	A	30.4183
A2J10_08T0032300.1	berberine and berberine like domain containing protein, expressed	berberine and berberine like domain containing protein, expressed	FAD linked oxidase, N-terminal domain containing protein.	0.233621	0.705726	3.02082	T	A	30.4183
A2J10_05T0121200.1	phospholipase D p1, Putative, expressed	#N/A	#N/A	0.969025	2.90917	3.00216	T	C	30.4183
A2J10_03T0360200.1	Putative BRCA1 C Terminus domain containing protein, expressed	magnesium-chelatase subunit chlD, chloroplast precursor, Putative, expressed	Magnesium-chelatase subunit ChlD, Chlorophyll synthesis, Chloroplast development	0.042846	0.128387	2.99648	A	T	30.4183
A2J10_02T0340400.1	expressed protein	expressed protein	Conserved hypothetical protein.	0.083841	0.251071	2.99461	G	T	30.4183
A2J10_03T0194200.1	vacuolar protein sorting-associated protein 52, Putative, expressed	#N/A	#N/A	1.78608	5.30619	2.97086	G	A	225
A2J10_01T0233700.1	Conserved hypothetical protein	expressed protein	Hypothetical protein.	0.131652	0.389458	2.95824	C	A	30.4183
A2J10_01T0233700.1	Conserved hypothetical protein	expressed protein	Hypothetical protein.	0.131652	0.389458	2.95824	A	G	29.4193
A2J10_02T0262700.1	phenylalanine ammonia-lyase, Putative, expressed	#N/A	#N/A	0.004985	0.014639	2.93661	A	G	47.9567
A2J10_02T0262700.1	phenylalanine ammonia-lyase, Putative, expressed	#N/A	#N/A	0.004985	0.014639	2.93661	A	G	124
A2J10_02T0265600.1	receptor-like protein kinase 5 precursor, Putative, expressed	#N/A	#N/A	0.165965	0.484821	2.92122	G	T	30.4183
A2J10_02T0265900.1	early nodulin 93 ENOD93 protein, Putative, expressed	early nodulin 93 ENOD93 protein, Putative, expressed	#N/A	3.00095	8.68755	2.89493	C	A	30.4183
A2J10_03T0305300.1	OsSCP19 - Putative Serine Carboxypeptidase homologue, expressed	#N/A	#N/A	0.34616	1.00075	2.89101	C	A	30.4183
A2J10_03T0341800.1	hydroxyacid oxidase 1, Putative, expressed	glycine-rich protein, Putative, expressed	Similar to Glycine-rich protein.	3.33546	9.57371	2.87028	G	C	30.4183
A2J10_01T0364600.1	acyltransferase, Putative, expressed	#N/A	#N/A	2.03264	5.76843	2.8379	T	C	228
A2J10_05T0208500.1	UDP-glucoronosyl/UDP-glucosyl transferase, Putative, expressed	#N/A	#N/A	0.072902	0.206781	2.83642	C	T	30.4183
A2J10_07T0283000.1	60S ribosomal protein L22-2, Putative, expressed	60S ribosomal protein L22-2, Putative, expressed	Similar to 60S ribosomal protein L22-2.	3.12734	8.83286	2.8244	A	G	122
A2J10_07T0283000.1	60S ribosomal protein L22-2, Putative, expressed	60S ribosomal protein L22-2, Putative, expressed	Similar to 60S ribosomal protein L22-2.	3.12734	8.83286	2.8244	A	G	80
A2J10_06T0091100.1	Conserved hypothetical protein	#N/A	#N/A	0.184986	0.519436	2.80797	T	C	30.4183
A2J10_06T0091100.1	Conserved hypothetical protein	#N/A	#N/A	0.184986	0.519436	2.80797	A	C	30.4183
A2J10_09T0099700.1	transporter family protein, Putative, expressed	#N/A	#N/A	0.328616	0.920783	2.802	A	T	30.4183
A2J10_06T0256000.1	tRNA pseudouridine synthase family protein, Putative, expressed	tRNA pseudouridine synthase family protein, Putative, expressed	Similar to Pseudouridylate synthase.	0.434208	1.21654	2.80174	T	A	30.4183
A2J10_06T0256000.1	tRNA pseudouridine synthase family protein, Putative, expressed	tRNA pseudouridine synthase family protein, Putative, expressed	Similar to Pseudouridylate synthase.	0.434208	1.21654	2.80174	A	T	30.4183
A2J10_02T0141300.1	aminotransferase, classes I and II, domain containing protein, expressed	aminotransferase, classes I and II, domain containing protein, expressed	Similar to Nicotianamine aminotransferase A.	0.349427	0.972161	2.78216	T	A	30.4183
A2J10_09T0138600.1	OsSigP6 - Putative Type I Signal Peptidase homologue; employs a Putative Ser/Lys catalytic dyad, expressed	OsSigP6 - Putative Type I Signal Peptidase homologue; employs a Putative Ser/Lys catalytic dyad, expressed	Peptidase S26A, signal peptidase I family protein.	4.22984	11.759	2.78002	A	G	30.4183
A2J10_09T0138600.1	OsSigP6 - Putative Type I Signal Peptidase homologue; employs a Putative Ser/Lys catalytic dyad, expressed	OsSigP6 - Putative Type I Signal Peptidase homologue; employs a Putative Ser/Lys catalytic dyad, expressed	Peptidase S26A, signal peptidase I family protein.	4.22984	11.759	2.78002	G	A	30.4183
A2J10_02T0149100.1	OsFBX48 - F-box domain containing protein, expressed	OsFBX48 - F-box domain containing protein, expressed	Cyclin-like F-box domain containing protein.	0.783546	2.16833	2.76734	G	T	30.4183
A2J10_04T0260100.1	inositol 1,3,4,5,6-pentakisphosphate 2-kinase, Putative, expressed	#N/A	#N/A	0.19918	0.549539	2.75901	T	C	172
A2J10_04T0260100.1	inositol 1,3,4,5,6-pentakisphosphate 2-kinase, Putative, expressed	#N/A	#N/A	0.19918	0.549539	2.75901	A	G	172
A2J10_04T0260100.1	inositol 1,3,4,5,6-pentakisphosphate 2-kinase, Putative, expressed	#N/A	#N/A	0.19918	0.549539	2.75901	T	G	169
A2J10_04T0260100.1	inositol 1,3,4,5,6-pentakisphosphate 2-kinase, Putative, expressed	#N/A	#N/A	0.19918	0.549539	2.75901	T	C	169
A2J10_04T0260100.1	inositol 1,3,4,5,6-pentakisphosphate 2-kinase, Putative, expressed	#N/A	#N/A	0.19918	0.549539	2.75901	T	C	142
A2J10_04T0260100.1	inositol 1,3,4,5,6-pentakisphosphate 2-kinase, Putative, expressed	#N/A	#N/A	0.19918	0.549539	2.75901	T	C	142
A2J10_04T0260100.1	inositol 1,3,4,5,6-pentakisphosphate 2-kinase, Putative, expressed	#N/A	#N/A	0.19918	0.549539	2.75901	A	G	80
A2J10_01T0145200.1	NAD dependent epimerase/dehydratase family domain containing protein, expressed	NAD dependent epimerase/dehydratase family domain containing protein, expressed	UDP-glucuronic acid decarboxylase	4.84952	13.3237	2.74744	A	T	228
A2J10_01T0145200.1	NAD dependent epimerase/dehydratase family domain containing protein, expressed	NAD dependent epimerase/dehydratase family domain containing protein, expressed	UDP-glucuronic acid decarboxylase	4.84952	13.3237	2.74744	T	C	228
A2J10_01T0145200.1	NAD dependent epimerase/dehydratase family domain containing protein, expressed	NAD dependent epimerase/dehydratase family domain containing protein, expressed	UDP-glucuronic acid decarboxylase	4.84952	13.3237	2.74744	A	T	228
A2J10_10T0049600.1	Conserved hypothetical protein	Conserved hypothetical protein	Pullulanase-type starch debranching enzyme (EC 3.2.1.41)	0.130891	0.357045	2.7278	C	T	30.4183
A2J10_08T0137100.1	ABC transporter, ATP-binding protein, Putative, expressed	ABC transporter, ATP-binding protein, Putative, expressed	ABC transporter-like domain containing protein.	1.76541	4.81064	2.72494	C	T	30.4183
A2J10_06T0009800.1	expressed protein	expressed protein	ER-localized glycosylated membrane protein, Ethylene signaling	0.402181	1.09503	2.72274	C	G	30.4183
A2J10_12T0007400.1	EF hand family protein, expressed	EF hand family protein, expressed	EF hand domain containing protein.	0.634821	1.71093	2.69514	T	A	30.4183
A2J10_07T0119000.1	Putative expressed protein	#N/A	#N/A	0.02812	0.075369	2.68026	C	T	30.4183
A2J10_06T0281300.1	60S acidic ribosomal protein, Putative, expressed	60S acidic ribosomal protein, Putative, expressed	Similar to 60S acidic ribosomal protein P3 (P1/P2-like) (P3A).	2.93973	7.86757	2.67629	C	A	30.4183
A2J10_04T0086800.1	disease resistance protein, Putative, expressed	disease resistance protein, Putative, expressed	Similar to NBS-LRR protein (Fragment).	0.152305	0.407423	2.67505	A	T	30.4183
A2J10_04T0086800.1	disease resistance protein, Putative, expressed	disease resistance protein, Putative, expressed	Similar to NBS-LRR protein (Fragment).	0.152305	0.407423	2.67505	T	C	30.4183
A2J10_04T0024700.1	Conserved hypothetical protein	#N/A	#N/A	0.24146	0.645875	2.67487	T	C	212
A2J10_04T0024700.1	Conserved hypothetical protein	#N/A	#N/A	0.24146	0.645875	2.67487	T	C	153
A2J10_11T0176100.1	DNA-directed RNA polymerase subunit beta, Putative, expressed	#N/A	#N/A	1.94573	5.17204	2.65815	G	A	36.9911
A2J10_11T0176100.1	DNA-directed RNA polymerase subunit beta, Putative, expressed	#N/A	#N/A	1.94573	5.17204	2.65815	C	T	41.9159
A2J10_12T0110100.1	Conserved hypothetical protein	#N/A	#N/A	3.49052	9.24259	2.64791	C	T	114
A2J10_12T0110100.1	Conserved hypothetical protein	#N/A	#N/A	3.49052	9.24259	2.64791	G	A	80
A2J10_12T0110100.1	Conserved hypothetical protein	#N/A	#N/A	3.49052	9.24259	2.64791	G	C	225
A2J10_12T0110100.1	Conserved hypothetical protein	#N/A	#N/A	3.49052	9.24259	2.64791	A	G	225
A2J10_12T0110100.1	Conserved hypothetical protein	#N/A	#N/A	3.49052	9.24259	2.64791	A	G	225
A2J10_12T0110100.1	Conserved hypothetical protein	#N/A	#N/A	3.49052	9.24259	2.64791	C	A	225
A2J10_12T0110100.1	Conserved hypothetical protein	#N/A	#N/A	3.49052	9.24259	2.64791	T	G	225
A2J10_12T0110100.1	Conserved hypothetical protein	#N/A	#N/A	3.49052	9.24259	2.64791	T	C	75
A2J10_12T0110100.1	Conserved hypothetical protein	#N/A	#N/A	3.49052	9.24259	2.64791	T	C	66
A2J10_12T0110100.1	Conserved hypothetical protein	#N/A	#N/A	3.49052	9.24259	2.64791	C	A	187
A2J10_12T0110100.1	Conserved hypothetical protein	#N/A	#N/A	3.49052	9.24259	2.64791	A	G	161
A2J10_12T0110100.1	Conserved hypothetical protein	#N/A	#N/A	3.49052	9.24259	2.64791	A	G	145
A2J10_12T0110100.1	Conserved hypothetical protein	#N/A	#N/A	3.49052	9.24259	2.64791	T	A	145
A2J10_12T0110100.1	Conserved hypothetical protein	#N/A	#N/A	3.49052	9.24259	2.64791	A	C	140
A2J10_12T0110100.1	Conserved hypothetical protein	#N/A	#N/A	3.49052	9.24259	2.64791	T	G	30.4183
A2J10_12T0110100.1	Conserved hypothetical protein	#N/A	#N/A	3.49052	9.24259	2.64791	G	A	30.4183
A2J10_12T0110100.1	Conserved hypothetical protein	#N/A	#N/A	3.49052	9.24259	2.64791	T	C	30.4183
A2J10_12T0112000.1	Putative expressed protein	Putative expressed protein	#N/A	0.724171	1.91596	2.64574	G	T	30.4183
A2J10_03T0060800.1	ternary complex factor MIP1, Putative, expressed	ternary complex factor MIP1, Putative, expressed	Hypothetical gene.	0.068383	0.179529	2.62535	A	G	30.4183
A2J10_12T0078100.2	expressed protein	expressed protein	Similar to Dual specificity protein phosphatase 8 (EC 3.1.3.48) (EC 3.1.3.16) (Neuronal tyrosine threonine phosphatase 1).	0.034811	0.09085	2.60981	C	A	30.4183
A2J10_03T0258400.3	Putative expressed protein	Hypothetical protein	#N/A	0.376835	0.972756	2.58138	G	A	23.7473
A2J10_07T0092300.1	Conserved hypothetical protein	Conserved hypothetical protein	Conserved hypothetical protein.	0.018693	0.047887	2.56176	G	T	30.4183
A2J10_03T0133900.2	Putative myb-like DNA-binding domain containing protein, expressed	#N/A	#N/A	0.569975	1.45761	2.55731	A	T	30.4183
A2J10_09T0094000.2	Conserved hypothetical protein	#N/A	#N/A	0.010945	0.027956	2.55423	T	C	30.4183
A2J10_07T0254300.4	BAH domain containing protein, expressed	#N/A	#N/A	0.609932	1.54457	2.53236	G	T	30.4183
A2J10_11T0037000.1	actin, Putative, expressed	#N/A	#N/A	27.618	69.4639	2.51517	C	G	30.4183
A2J10_11T0037000.1	actin, Putative, expressed	#N/A	#N/A	27.618	69.4639	2.51517	A	G	30.4183
A2J10_05T0024400.1	CRS1/YhbY domain containing protein, Putative, expressed	CRS1/YhbY domain containing protein, Putative, expressed	RNA-binding, CRM domain domain containing protein.	0.224815	0.563658	2.50721	C	T	40.4148
A2J10_07T0161700.1	anthocyanidin 5,3-O-glucosyltransferase, Putative, expressed	#N/A	UDP-glucuronosyl/UDP-glucosyltransferase family protein.	0.071783	0.179695	2.50331	C	A	30.4183
A2J10_01T0184000.1	mov34/MPN/PAD-1 family protein, expressed	#N/A	#N/A	1.34357	3.31913	2.47038	C	T	30.4183
A2J10_02T0365100.1	Putative phosphate-induced protein 1 conserved region domain containing protein, expressed	phosphate-induced protein 1 conserved region domain containing protein, expressed	Similar to Phi-1-like phosphate-induced protein.	0.387233	0.953614	2.46264	A	G	30.4183
A2J10_07T0245600.1	sphingolipid C4-hydroxylase SUR2, Putative, expressed	sphingolipid C4-hydroxylase SUR2, Putative, expressed	Fatty acid hydroxylase domain containing protein.	0.815692	2.00458	2.45752	A	G	30.4183
A2J10_03T0027900.1	protein kinase family protein, Putative, expressed	#N/A	#N/A	1.71177	4.19254	2.44924	G	T	30.4183
A2J10_04T0239300.1	aminotransferase, Putative, expressed	#N/A	#N/A	0.087906	0.213907	2.43336	T	C	49.9293
A2J10_01T0492600.1	rho-GTPase-activating protein-like, Putative, expressed	#N/A	#N/A	2.18422	5.28476	2.41952	C	T	30.4183
A2J10_02T0406700.1	expressed protein	expressed protein	HAD-superfamily hydrolase, subfamily IA, variant 2 protein.	0.986826	2.38134	2.41313	C	G	30.4183
A2J10_07T0044800.1	START domain containing protein, Putative, expressed	#N/A	#N/A	2.52655	6.09581	2.4127	A	G	30.4183
A2J10_11T0095500.1	thiamine pyrophosphate enzyme, C-terminal TPP binding domain containing protein, expressed	thiamine pyrophosphate enzyme, C-terminal TPP binding domain containing protein, expressed	Acetolactate synthase (EC4.6.3.8), Acetohydroxy acid synthase, Herbicide resistance (mutated form of rice ALS, OsmALS (W548L/S627I))	19.6964	47.3866	2.40586	C	T	30.4183
A2J10_01T0281300.1	DUF1645 domain containing protein, Putative, expressed	DUF1645 domain containing protein, Putative, expressed	#N/A	0.341627	0.821661	2.40514	T	C	30.4183
A2J10_06T0229700.1	CC-NBS-LRR protein, Putative, expressed	#N/A	#N/A	0.114667	0.275039	2.39859	C	T	30.4183
A2J10_06T0229700.1	CC-NBS-LRR protein, Putative, expressed	#N/A	#N/A	0.114667	0.275039	2.39859	G	T	29.4193
A2J10_01T0060200.1	phosducin-like protein 3, Putative, expressed	phosducin-like protein 3, Putative, expressed	Thioredoxin fold domain containing protein.	1.96717	4.71777	2.39826	C	T	30.4183
A2J10_01T0088500.1	peroxisomal membrane protein, Putative, expressed	peroxisomal membrane protein, Putative, expressed	Mpv17/PMP22 family protein.	0.623927	1.49592	2.39759	C	A	30.4183
A2J10_10T0153800.1	Putative cytochrome b5-like Heme/Steroid binding domain containing protein, expressed	cytochrome b5-like Heme/Steroid binding domain containing protein, expressed	Cytochrome b5 protein, Regulation of high-affinity K<sup>+</sup> transport in response to salt stress, Salt tolerance	12.8908	30.8911	2.39636	T	C	30.4183
A2J10_01T0459000.1	ribulose bisphosphate carboxylase large chain precursor, Putative, expressed	#N/A	#N/A	46.7193	111.772	2.39241	C	T	228
A2J10_01T0459000.1	ribulose bisphosphate carboxylase large chain precursor, Putative, expressed	#N/A	#N/A	46.7193	111.772	2.39241	C	T	228
A2J10_01T0459000.1	ribulose bisphosphate carboxylase large chain precursor, Putative, expressed	#N/A	#N/A	46.7193	111.772	2.39241	C	T	228
A2J10_01T0459000.1	ribulose bisphosphate carboxylase large chain precursor, Putative, expressed	#N/A	#N/A	46.7193	111.772	2.39241	C	T	199
A2J10_01T0459000.1	ribulose bisphosphate carboxylase large chain precursor, Putative, expressed	#N/A	#N/A	46.7193	111.772	2.39241	C	T	194
A2J10_01T0459000.1	ribulose bisphosphate carboxylase large chain precursor, Putative, expressed	#N/A	#N/A	46.7193	111.772	2.39241	T	C	170
A2J10_01T0459000.1	ribulose bisphosphate carboxylase large chain precursor, Putative, expressed	#N/A	#N/A	46.7193	111.772	2.39241	C	T	52
A2J10_01T0459000.1	ribulose bisphosphate carboxylase large chain precursor, Putative, expressed	#N/A	#N/A	46.7193	111.772	2.39241	T	C	225
A2J10_01T0459000.1	ribulose bisphosphate carboxylase large chain precursor, Putative, expressed	#N/A	#N/A	46.7193	111.772	2.39241	A	G	225
A2J10_01T0459000.1	ribulose bisphosphate carboxylase large chain precursor, Putative, expressed	#N/A	#N/A	46.7193	111.772	2.39241	A	C	225
A2J10_01T0459000.1	ribulose bisphosphate carboxylase large chain precursor, Putative, expressed	#N/A	#N/A	46.7193	111.772	2.39241	T	C	225
A2J10_01T0459000.1	ribulose bisphosphate carboxylase large chain precursor, Putative, expressed	#N/A	#N/A	46.7193	111.772	2.39241	T	C	225
A2J10_01T0459000.1	ribulose bisphosphate carboxylase large chain precursor, Putative, expressed	#N/A	#N/A	46.7193	111.772	2.39241	A	G	225
A2J10_01T0459000.1	ribulose bisphosphate carboxylase large chain precursor, Putative, expressed	#N/A	#N/A	46.7193	111.772	2.39241	T	C	225
A2J10_01T0459000.1	ribulose bisphosphate carboxylase large chain precursor, Putative, expressed	#N/A	#N/A	46.7193	111.772	2.39241	T	C	225
A2J10_01T0459000.1	ribulose bisphosphate carboxylase large chain precursor, Putative, expressed	#N/A	#N/A	46.7193	111.772	2.39241	A	G	225
A2J10_01T0459000.1	ribulose bisphosphate carboxylase large chain precursor, Putative, expressed	#N/A	#N/A	46.7193	111.772	2.39241	T	G	225
A2J10_01T0459000.1	ribulose bisphosphate carboxylase large chain precursor, Putative, expressed	#N/A	#N/A	46.7193	111.772	2.39241	T	A	190
A2J10_01T0459000.1	ribulose bisphosphate carboxylase large chain precursor, Putative, expressed	#N/A	#N/A	46.7193	111.772	2.39241	C	T	166
A2J10_01T0459000.1	ribulose bisphosphate carboxylase large chain precursor, Putative, expressed	#N/A	#N/A	46.7193	111.772	2.39241	A	G	122
A2J10_01T0459000.1	ribulose bisphosphate carboxylase large chain precursor, Putative, expressed	#N/A	#N/A	46.7193	111.772	2.39241	A	T	82
A2J10_01T0459000.1	ribulose bisphosphate carboxylase large chain precursor, Putative, expressed	#N/A	#N/A	46.7193	111.772	2.39241	C	T	44.4146
A2J10_01T0459000.1	ribulose bisphosphate carboxylase large chain precursor, Putative, expressed	#N/A	#N/A	46.7193	111.772	2.39241	A	G	44.4146
A2J10_01T0459000.1	ribulose bisphosphate carboxylase large chain precursor, Putative, expressed	#N/A	#N/A	46.7193	111.772	2.39241	T	G	225
A2J10_01T0459000.1	ribulose bisphosphate carboxylase large chain precursor, Putative, expressed	#N/A	#N/A	46.7193	111.772	2.39241	C	T	225
A2J10_01T0459000.1	ribulose bisphosphate carboxylase large chain precursor, Putative, expressed	#N/A	#N/A	46.7193	111.772	2.39241	C	T	225
A2J10_01T0459000.1	ribulose bisphosphate carboxylase large chain precursor, Putative, expressed	#N/A	#N/A	46.7193	111.772	2.39241	A	G	121
A2J10_01T0459000.1	ribulose bisphosphate carboxylase large chain precursor, Putative, expressed	#N/A	#N/A	46.7193	111.772	2.39241	C	T	52
A2J10_01T0459000.1	ribulose bisphosphate carboxylase large chain precursor, Putative, expressed	#N/A	#N/A	46.7193	111.772	2.39241	A	G	34.4159
A2J10_01T0459000.1	ribulose bisphosphate carboxylase large chain precursor, Putative, expressed	#N/A	#N/A	46.7193	111.772	2.39241	A	G	29.4193
A2J10_01T0459000.1	ribulose bisphosphate carboxylase large chain precursor, Putative, expressed	#N/A	#N/A	46.7193	111.772	2.39241	T	C	30.4183
A2J10_01T0459000.1	ribulose bisphosphate carboxylase large chain precursor, Putative, expressed	#N/A	#N/A	46.7193	111.772	2.39241	T	C	30.4183
A2J10_01T0459000.1	ribulose bisphosphate carboxylase large chain precursor, Putative, expressed	#N/A	#N/A	46.7193	111.772	2.39241	G	A	30.4183
A2J10_01T0459000.1	ribulose bisphosphate carboxylase large chain precursor, Putative, expressed	#N/A	#N/A	46.7193	111.772	2.39241	T	C	30.4183
A2J10_01T0459000.1	ribulose bisphosphate carboxylase large chain precursor, Putative, expressed	#N/A	#N/A	46.7193	111.772	2.39241	T	C	30.4183
A2J10_01T0459000.1	ribulose bisphosphate carboxylase large chain precursor, Putative, expressed	#N/A	#N/A	46.7193	111.772	2.39241	T	C	30.4183
A2J10_10T0083800.1	Hypothetical protein	DNA-directed RNA polymerase subunit beta, Putative, expressed	#N/A	0.222488	0.530943	2.38639	G	A	63
A2J10_10T0083800.1	Hypothetical protein	DNA-directed RNA polymerase subunit beta, Putative, expressed	#N/A	0.222488	0.530943	2.38639	G	A	31.6301
A2J10_05T0246400.1	DRD1, Putative, expressed	DRD1, Putative, expressed	#N/A	0.394617	0.937777	2.37642	A	G	191
A2J10_03T0088500.1	Conserved hypothetical protein	#N/A	#N/A	13.2592	31.4984	2.37559	T	C	80
A2J10_10T0063700.1	Conserved hypothetical protein	#N/A	#N/A	43.8808	104.201	2.37464	T	C	38.415
A2J10_07T0034000.1	glucan endo-1,3-beta-glucosidase precursor, Putative, expressed	glucan endo-1,3-beta-glucosidase precursor, Putative, expressed	Similar to 3-glucanase.	0.602636	1.43084	2.3743	G	T	30.4183
A2J10_05T0137200.4	nucleolar matrix protein-related, Putative, expressed	#N/A	#N/A	0.666403	1.57857	2.36879	T	C	30.4183
A2J10_05T0137200.4	nucleolar matrix protein-related, Putative, expressed	#N/A	#N/A	0.666403	1.57857	2.36879	G	T	30.4183
A2J10_05T0137200.4	nucleolar matrix protein-related, Putative, expressed	#N/A	#N/A	0.666403	1.57857	2.36879	C	T	21.4455
A2J10_08T0049100.1	Conserved hypothetical protein	#N/A	#N/A	0.038686	0.091481	2.36471	C	A	30.4183
A2J10_07T0253300.1	FGGY family of carbohydrate kinases, Putative, expressed	FGGY family of carbohydrate kinases, Putative, expressed	Carbohydrate kinase, FGGY family protein.	2.24999	5.31648	2.36289	C	G	225
A2J10_04T0026000.1	amidase family protein, Putative, expressed	amidase family protein, Putative, expressed	Similar to OSIGBa0140C02.7 protein.	0.127504	0.300575	2.35738	T	C	30.4183
A2J10_07T0286500.2	expressed protein	#N/A	#N/A	0.292848	0.684126	2.33611	A	G	30.4183
A2J10_04T0095200.1	abscisic acid insensitive 8, Putative, expressed	abscisic acid insensitive 8, Putative, expressed	#N/A	0.820237	1.91219	2.33127	C	T	30.4183
A2J10_07T0292200.1	Conserved hypothetical protein	#N/A	#N/A	0.08564	0.198948	2.32307	A	G	30.4183
A2J10_03T0384700.4	regulatory protein, Putative, expressed	regulatory protein, Putative, expressed	Nucleotide-diphospho-sugar transferase domain containing protein.	1.0919	2.52936	2.31647	C	T	30.4183
A2J10_11T0096400.1	Putative bacterial transferase hexapeptide domain containing protein, expressed	#N/A	#N/A	1.40731	3.25728	2.31455	T	C	92
A2J10_11T0096400.1	Putative bacterial transferase hexapeptide domain containing protein, expressed	#N/A	#N/A	1.40731	3.25728	2.31455	G	C	44.8767
A2J10_11T0096400.1	Putative bacterial transferase hexapeptide domain containing protein, expressed	#N/A	#N/A	1.40731	3.25728	2.31455	T	G	37.6733
A2J10_11T0096400.1	Putative bacterial transferase hexapeptide domain containing protein, expressed	#N/A	#N/A	1.40731	3.25728	2.31455	C	T	26.8718
A2J10_11T0096400.1	Putative bacterial transferase hexapeptide domain containing protein, expressed	#N/A	#N/A	1.40731	3.25728	2.31455	T	C	22.6563
A2J10_11T0096400.1	Putative bacterial transferase hexapeptide domain containing protein, expressed	#N/A	#N/A	1.40731	3.25728	2.31455	T	G	37.4152
A2J10_11T0096400.1	Putative bacterial transferase hexapeptide domain containing protein, expressed	#N/A	#N/A	1.40731	3.25728	2.31455	G	A	37.4152
A2J10_11T0096400.1	Putative bacterial transferase hexapeptide domain containing protein, expressed	#N/A	#N/A	1.40731	3.25728	2.31455	C	T	30.4183
A2J10_02T0417000.1	cyclin, Putative, expressed	cyclin, Putative, expressed	Cyclin-D2-1.	0.151077	0.3451	2.28427	C	T	30.4183
A2J10_02T0417000.1	cyclin, Putative, expressed	cyclin, Putative, expressed	Cyclin-D2-1.	0.151077	0.3451	2.28427	A	G	30.4183
A2J10_04T0242300.1	TKL_IRAK_CrRLK1L-1.9 - The CrRLK1L-1 subfamily has homology to the CrRLK1L homolog, expressed	TKL_IRAK_CrRLK1L-1.9 - The CrRLK1L-1 subfamily has homology to the CrRLK1L homolog, expressed	Similar to Resistance protein candidate (Fragment).	0.392188	0.8931	2.27722	T	C	21.4455
A2J10_02T0213200.1	OsPDIL5-3 protein disulfide isomerase PDIL5-3, expressed	Putative OsPDIL5-3 protein disulfide isomerase PDIL5-3, expressed	#N/A	0.580173	1.31964	2.27456	G	T	30.4183
A2J10_10T0064400.1	cytochrome c oxidase subunit 1, Putative, expressed	#N/A	#N/A	31.9853	72.6845	2.27243	C	G	148
A2J10_01T0459100.1	expressed protein	expressed protein	FMN-binding split barrel-related domain containing protein.	0.029621	0.067292	2.27177	T	C	222
A2J10_01T0459100.1	expressed protein	expressed protein	FMN-binding split barrel-related domain containing protein.	0.029621	0.067292	2.27177	A	G	225
A2J10_01T0459100.1	expressed protein	expressed protein	FMN-binding split barrel-related domain containing protein.	0.029621	0.067292	2.27177	T	C	83
A2J10_01T0459100.1	expressed protein	expressed protein	FMN-binding split barrel-related domain containing protein.	0.029621	0.067292	2.27177	A	G	59
A2J10_01T0459100.1	expressed protein	expressed protein	FMN-binding split barrel-related domain containing protein.	0.029621	0.067292	2.27177	T	C	41.4148
A2J10_08T0018700.1	BTBN17 - Bric-a-Brac, Tramtrack, Broad Complex BTB domain with non-phototropic hypocotyl 3 NPH3 and coiled-coil domains, expressed	60S acidic ribosomal protein P0, Putative, expressed	60S acidic ribosomal protein P0.	6.71394	15.2455	2.27073	A	G	30.4183
A2J10_01T0163300.2	tetratricopeptide repeat domain containing protein, expressed	#N/A	#N/A	0.246771	0.560005	2.26933	C	G	30.4183
A2J10_08T0119300.1	Conserved hypothetical protein	#N/A	#N/A	0.142032	0.320458	2.25624	C	T	30.4183
A2J10_04T0044900.1	chloroplast 30S ribosomal protein S15, Putative, expressed	#N/A	#N/A	54.567	123.004	2.25419	G	A	24.288
A2J10_01T0287000.1	expressed protein	S-locus-like receptor protein kinase, Putative, expressed	S-Domain kinase-4	0.121756	0.274417	2.25383	T	C	30.4183
A2J10_01T0090200.1	ubiquitin-conjugating enzyme, Putative, expressed	#N/A	#N/A	0.066723	0.150298	2.25257	T	A	30.4183
A2J10_05T0192700.1	OsSCP28 - Putative Serine Carboxypeptidase homologue, expressed	#N/A	#N/A	0.107439	0.241271	2.24566	T	C	30.4183
A2J10_07T0225000.1	pentatricopeptide repeat domain containing protein, Putative, expressed	pentatricopeptide repeat domain containing protein, Putative, expressed	#N/A	0.362994	0.815	2.24522	C	T	30.4183
A2J10_08T0050700.1	expressed protein	#N/A	#N/A	3.22061	7.22323	2.24282	G	A	30.4183
A2J10_03T0222400.1	metal ion binding protein, Putative, expressed	metal ion binding protein, Putative, expressed	Paladin, Tyrosine phosphatase-like protein, XA21-mediated immunity	2.21892	4.97524	2.24219	A	G	30.4183
A2J10_01T0019100.1	sufB/sufD domain containing protein, Putative, expressed	sufB/sufD domain containing protein, Putative, expressed	SufBD family protein.	2.42312	5.42082	2.23713	A	G	30.4183
A2J10_02T0287800.2	UDP-glucose glycoprotein glucosyltransferase 1 precursor, Putative, expressed	#N/A	#N/A	0.082093	0.183406	2.23412	A	T	30.4183
A2J10_06T0198000.1	cysteine synthase, Putative, expressed	cysteine synthase, Putative, expressed	#N/A	0.216852	0.483775	2.2309	A	G	21.4455
A2J10_08T0208200.1	endonuclease/exonuclease/phosphatase family domain containing protein, expressed	endonuclease/exonuclease/phosphatase family domain containing protein, expressed	Similar to Type II inositol-1,4,5-trisphosphate 5-phosphatase 12 (EC 3.1.3.36) (At5PTase12) (FRAGILE FIBER3 protein).	0.06992	0.155714	2.22703	A	G	30.4183
A2J10_04T0077700.1	rp1, Putative, expressed	#N/A	#N/A	0.288651	0.640655	2.21948	T	C	21.4455
A2J10_04T0169500.1	expressed protein	expressed protein	Similar to OSIGBa0155K17.11 protein.	0.706716	1.5661	2.21603	A	T	85
A2J10_04T0169500.1	expressed protein	expressed protein	Similar to OSIGBa0155K17.11 protein.	0.706716	1.5661	2.21603	C	A	30.4183
A2J10_10T0056500.1	protein kinase domain containing protein, expressed	protein kinase domain containing protein, expressed	Protein kinase, core domain containing protein.	0.049999	0.110617	2.21238	C	A	30.4183
A2J10_07T0022100.1	Putative helix-loop-helix DNA-binding domain containing protein, expressed	helix-loop-helix DNA-binding domain containing protein, expressed	Phytochrome-interacting bHLH factor, Cross-talk between light and stress signaling	1.42227	3.14599	2.21195	C	T	30.4183
A2J10_02T0071200.1	Ubiquitin family domain containing protein, expressed	Ubiquitin family domain containing protein, expressed	Similar to DNA-damage inducible protein DDI1-like.	3.45418	7.60268	2.20101	G	A	30.4183
A2J10_11T0204700.1	expressed protein	receptor kinase, Putative, expressed	#N/A	0.206416	0.45288	2.19402	C	G	30.4183
A2J10_01T0396800.1	eukaryotic aspartyl protease domain containing protein, expressed	eukaryotic aspartyl protease domain containing protein, expressed	Peptidase A1 domain containing protein.	0.636078	1.39321	2.19031	A	G	30.4183
A2J10_05T0138300.2	zinc finger protein, Putative, expressed	#N/A	#N/A	0.106144	0.230716	2.17361	T	A	30.4183
A2J10_12T0061100.4	Putative expressed protein	expressed protein	Conserved hypothetical protein.	0.060109	0.130248	2.16686	A	G	30.4183
A2J10_02T0064600.1	STRUBBELIG-RECEPTOR FAMILY 7 precursor, Putative, expressed	STRUBBELIG-RECEPTOR FAMILY 7 precursor, Putative, expressed	Serine/threonine protein kinase-related domain containing protein.	0.195951	0.422282	2.15504	G	A	30.4183
A2J10_01T0063300.2	expressed protein	#N/A	#N/A	0.060314	0.129916	2.15399	G	T	30.4183
A2J10_08T0043900.1	histone-like transcription factor and archaeal histone, Putative, expressed	histone-like transcription factor and archaeal histone, Putative, expressed	Putative HAP3 subunit of the CCAAT box-binding transcription factor, Flowering time, Short-day promotion, Long-day repression	0.219758	0.47329	2.15369	C	T	30.4183
A2J10_04T0196800.1	coiled-coil domain-containing protein 124, Putative, expressed	#N/A	#N/A	0.090839	0.195565	2.15287	T	C	30.4183
A2J10_03T0139800.1	bZIP transcription factor domain containing protein, expressed	bZIP transcription factor domain containing protein, expressed	bZIP DNA-binding protein, Disease resistance, Vascular development	0.133802	0.288027	2.15264	C	A	30.4183
A2J10_06T0217400.1	mitochondrial carrier protein, Putative, expressed	#N/A	#N/A	2.67911	5.76064	2.1502	C	G	30.4183
A2J10_09T0170800.1	uridine/cytidine kinase-like 1, Putative, expressed	ribulose-phosphate 3-epimerase, Putative, expressed	Aldolase-type TIM barrel domain containing protein.	2.29927	4.94285	2.14974	T	A	225
A2J10_09T0170800.1	uridine/cytidine kinase-like 1, Putative, expressed	ribulose-phosphate 3-epimerase, Putative, expressed	Aldolase-type TIM barrel domain containing protein.	2.29927	4.94285	2.14974	A	C	225
A2J10_09T0170800.1	uridine/cytidine kinase-like 1, Putative, expressed	ribulose-phosphate 3-epimerase, Putative, expressed	Aldolase-type TIM barrel domain containing protein.	2.29927	4.94285	2.14974	A	G	225
A2J10_09T0170800.1	uridine/cytidine kinase-like 1, Putative, expressed	ribulose-phosphate 3-epimerase, Putative, expressed	Aldolase-type TIM barrel domain containing protein.	2.29927	4.94285	2.14974	C	G	225
A2J10_01T0235700.1	ribosomal protein L25, Putative, expressed	ribosomal protein L25, Putative, expressed	Ribosomal protein L25 family protein.	0.174427	0.374111	2.1448	T	C	30.4183
A2J10_03T0000400.2	endonuclease, Putative, expressed	#N/A	#N/A	0.39928	0.855783	2.14332	T	C	30.4183
A2J10_01T0370600.1	apocytochrome f precursor, Putative, expressed	photosystem I assembly protein ycf4, Putative, expressed	#N/A	350.866	747.205	2.1296	A	G	30.4183
A2J10_01T0019200.1	MYB family transcription factor, Putative, expressed	MYB family transcription factor, Putative, expressed	Protein of unknown function DUF3326 domain containing protein.	0.482008	1.02355	2.12352	T	C	30.4183
A2J10_03T0050300.1	Putative expressed protein	#N/A	Conserved hypothetical protein.	1.09358	2.32076	2.12216	A	C	225
A2J10_03T0050300.1	Putative expressed protein	#N/A	Conserved hypothetical protein.	1.09358	2.32076	2.12216	T	G	152
A2J10_03T0050300.1	Putative expressed protein	#N/A	Conserved hypothetical protein.	1.09358	2.32076	2.12216	A	C	122
A2J10_03T0050300.1	Putative expressed protein	#N/A	Conserved hypothetical protein.	1.09358	2.32076	2.12216	A	G	83
A2J10_08T0071900.1	Conserved hypothetical protein	#N/A	#N/A	0.620592	1.31346	2.11647	G	T	30.4183
A2J10_01T0466800.1	vacuolar protein sorting-associated protein 53, Putative, expressed	vacuolar protein sorting-associated protein 53, Putative, expressed	Similar to heat-intolerant 1.	2.91323	6.14643	2.10983	G	A	30.4183
A2J10_01T0116700.2	DNA gyrase subunit B, chloroplast/mitochondrial precursor, Putative, expressed	#N/A	#N/A	0.078243	0.164605	2.10377	T	C	30.4183
A2J10_12T0080600.1	nnrU, Putative, expressed	nnrU, Putative, expressed	Chloroplast &zeta;-carotene isomerase (Z-ISO), Carotenoid biosynthesis, Biosynthesis of strigolactone and abscisic acid, Regulation of tillering, Abiotic stress tolerance, Regulation of photosynthesis and chloroplast development	7.74984	16.2583	2.09789	C	T	225
A2J10_04T0095300.1	dehydration response related protein, Putative, expressed	#N/A	Similar to ankyrin protein kinase-like.	0.385625	0.808947	2.09776	C	T	119
A2J10_06T0019600.1	Putative expressed protein	expressed protein	Hypothetical conserved gene.	0.132646	0.275562	2.07742	G	A	30.4183
A2J10_07T0182200.1	universal stress protein domain containing protein, Putative, expressed	#N/A	#N/A	0.063244	0.131084	2.07267	T	C	30.4183
A2J10_10T0062700.1	NADPH-dependent oxidoreductase, Putative, expressed	#N/A	#N/A	2.03591	4.20379	2.06482	C	T	228
A2J10_10T0062700.1	NADPH-dependent oxidoreductase, Putative, expressed	#N/A	#N/A	2.03591	4.20379	2.06482	G	A	109
A2J10_10T0062700.1	NADPH-dependent oxidoreductase, Putative, expressed	#N/A	#N/A	2.03591	4.20379	2.06482	A	G	225
A2J10_10T0062700.1	NADPH-dependent oxidoreductase, Putative, expressed	#N/A	#N/A	2.03591	4.20379	2.06482	C	T	225
A2J10_10T0062700.1	NADPH-dependent oxidoreductase, Putative, expressed	#N/A	#N/A	2.03591	4.20379	2.06482	G	T	189
A2J10_10T0062700.1	NADPH-dependent oxidoreductase, Putative, expressed	#N/A	#N/A	2.03591	4.20379	2.06482	A	C	189
A2J10_10T0062700.1	NADPH-dependent oxidoreductase, Putative, expressed	#N/A	#N/A	2.03591	4.20379	2.06482	T	C	169
A2J10_10T0062700.1	NADPH-dependent oxidoreductase, Putative, expressed	#N/A	#N/A	2.03591	4.20379	2.06482	A	C	153
A2J10_10T0062700.1	NADPH-dependent oxidoreductase, Putative, expressed	#N/A	#N/A	2.03591	4.20379	2.06482	A	G	97
A2J10_10T0062700.1	NADPH-dependent oxidoreductase, Putative, expressed	#N/A	#N/A	2.03591	4.20379	2.06482	T	A	225
A2J10_10T0062700.1	NADPH-dependent oxidoreductase, Putative, expressed	#N/A	#N/A	2.03591	4.20379	2.06482	T	C	225
A2J10_10T0062700.1	NADPH-dependent oxidoreductase, Putative, expressed	#N/A	#N/A	2.03591	4.20379	2.06482	T	C	83
A2J10_10T0062700.1	NADPH-dependent oxidoreductase, Putative, expressed	#N/A	#N/A	2.03591	4.20379	2.06482	C	G	80
A2J10_10T0062700.1	NADPH-dependent oxidoreductase, Putative, expressed	#N/A	#N/A	2.03591	4.20379	2.06482	T	C	74
A2J10_10T0062700.1	NADPH-dependent oxidoreductase, Putative, expressed	#N/A	#N/A	2.03591	4.20379	2.06482	A	T	69
A2J10_10T0062700.1	NADPH-dependent oxidoreductase, Putative, expressed	#N/A	#N/A	2.03591	4.20379	2.06482	A	G	69
A2J10_10T0062700.1	NADPH-dependent oxidoreductase, Putative, expressed	#N/A	#N/A	2.03591	4.20379	2.06482	A	G	34.4159
A2J10_06T0288800.1	PTR-like peptide transporter, putatuve, expressed	PTR-like peptide transporter, putatuve, expressed	Oligopeptide transporter domain containing protein.	0.0786	0.162053	2.06174	G	T	30.4183
A2J10_03T0289600.1	expressed protein	expressed protein	Similar to Toc64.	2.33885	4.81111	2.05704	C	A	30.4183
A2J10_01T0371100.1	disease resistance protein RPS2, Putative, expressed	#N/A	#N/A	0.049549	0.101747	2.05346	G	C	30.4183
A2J10_09T0015500.1	histone-lysine N-methyltransferase, H3 lysine-4 specific ATX1, Putative, expressed	#N/A	#N/A	0.037841	0.077671	2.05256	G	A	30.4183
A2J10_02T0091700.1	protein kinase domain containing protein, expressed	protein kinase domain containing protein, expressed	Hypothetical conserved gene.	3.4461	7.05278	2.0466	G	A	30.4183
A2J10_02T0179600.1	Putative MBTB21 - Bric-a-Brac, Tramtrack, Broad Complex BTB domain with Meprin and TRAF Homology MATH domain, expressed	MBTB21 - Bric-a-Brac, Tramtrack, Broad Complex BTB domain with Meprin and TRAF Homology MATH domain, expressed	Similar to speckle-type POZ protein.	0.259496	0.529326	2.03982	C	T	30.4183
A2J10_11T0034400.1	digalactosyldiacylglycerol synthase, chloroplast precursor, Putative, expressed	tetratricopeptide-like helical, Putative, expressed	Pentatricopeptide repeat containing protein.	4.07146	8.27739	2.03303	A	T	30.4183
A2J10_01T0214500.1	ATP-binding region, ATPase-like domain containing protein, expressed	ATP-binding region, ATPase-like domain containing protein, expressed	Hypothetical conserved gene.	1.16043	2.35261	2.02736	T	C	30.4183
A2J10_03T0163900.2	pyrrolidone-carboxylate peptidase, Putative, expressed	#N/A	#N/A	0.871883	1.76103	2.0198	G	T	30.4183
A2J10_01T0306000.1	expressed protein	Putative expressed protein	Conserved hypothetical protein.	0.542631	1.08507	1.99965	A	G	30.4183
A2J10_09T0161500.1	polygalacturonase, Putative, expressed	polygalacturonase, Putative, expressed	Similar to polygalacturonase.	0.455721	0.909957	1.99674	G	C	30.4183
A2J10_02T0097100.1	citrate synthase, Putative, expressed	citrate synthase, Putative, expressed	Similar to Citrate synthase.	10.4593	20.7862	1.98733	T	C	30.4183
A2J10_06T0055500.1	Conserved hypothetical protein	#N/A	#N/A	0.032925	0.065299	1.98326	C	A	30.4183
A2J10_06T0159000.1	HAD superfamily phosphatase, Putative, expressed	HAD superfamily phosphatase, Putative, expressed	Similar to Acid phosphatase (EC 3.1.3.2) 1 allozyme 1.	0.305728	0.605779	1.98143	T	C	21.4455
A2J10_10T0078800.1	vacuolar-sorting receptor precursor, Putative, expressed	vacuolar-sorting receptor precursor, Putative, expressed	Similar to Vacuolar sorting receptor 4 precursor (AtVSR4) (Epidermal growth factor receptor-like protein 2b) (AtELP2b) (BP80-like protein a) (AtBP80a).	8.61698	17.051	1.97876	G	A	30.4183
A2J10_10T0078800.1	vacuolar-sorting receptor precursor, Putative, expressed	vacuolar-sorting receptor precursor, Putative, expressed	Similar to Vacuolar sorting receptor 4 precursor (AtVSR4) (Epidermal growth factor receptor-like protein 2b) (AtELP2b) (BP80-like protein a) (AtBP80a).	8.61698	17.051	1.97876	A	G	30.4183
A2J10_10T0096900.1	OsFBX385 - F-box domain containing protein, expressed	OsFBX385 - F-box domain containing protein, expressed	Cyclin-like F-box domain containing protein.	0.08613	0.170133	1.9753	G	A	30.4183
A2J10_11T0227200.1	translationally-controlled tumor protein, Putative, expressed	translationally-controlled tumor protein, Putative, expressed	Translationally controlled tumor protein, Mercury tolerance	99.6448	195.683	1.9638	T	G	154
A2J10_11T0227200.1	translationally-controlled tumor protein, Putative, expressed	translationally-controlled tumor protein, Putative, expressed	Translationally controlled tumor protein, Mercury tolerance	99.6448	195.683	1.9638	A	G	149
A2J10_09T0046800.1	expressed protein	expressed protein	Conserved hypothetical protein.	0.408306	0.800594	1.96077	C	T	44.4146
A2J10_03T0000500.1	tRNA/rRNA methyltransferase, Putative, expressed	#N/A	Similar to TAR RNA loop binding protein (TAR (HIV) RNA binding protein 1).	0.770856	1.50676	1.95466	C	G	30.4183
A2J10_02T0255000.3	regulatory subunit, Putative, expressed	#N/A	#N/A	6.50136	12.6761	1.94977	C	T	30.4183
A2J10_06T0121600.1	mitochondrial ribosomal protein S7, Putative, expressed	#N/A	#N/A	90.6806	176.723	1.94885	G	A	228
A2J10_06T0121600.1	mitochondrial ribosomal protein S7, Putative, expressed	#N/A	#N/A	90.6806	176.723	1.94885	G	A	228
A2J10_06T0121600.1	mitochondrial ribosomal protein S7, Putative, expressed	#N/A	#N/A	90.6806	176.723	1.94885	G	A	228
A2J10_06T0121600.1	mitochondrial ribosomal protein S7, Putative, expressed	#N/A	#N/A	90.6806	176.723	1.94885	T	C	225
A2J10_06T0121600.1	mitochondrial ribosomal protein S7, Putative, expressed	#N/A	#N/A	90.6806	176.723	1.94885	T	C	225
A2J10_06T0121600.1	mitochondrial ribosomal protein S7, Putative, expressed	#N/A	#N/A	90.6806	176.723	1.94885	T	C	225
A2J10_06T0121600.1	mitochondrial ribosomal protein S7, Putative, expressed	#N/A	#N/A	90.6806	176.723	1.94885	A	G	225
A2J10_06T0121600.1	mitochondrial ribosomal protein S7, Putative, expressed	#N/A	#N/A	90.6806	176.723	1.94885	T	C	225
A2J10_06T0121600.1	mitochondrial ribosomal protein S7, Putative, expressed	#N/A	#N/A	90.6806	176.723	1.94885	A	G	225
A2J10_06T0121600.1	mitochondrial ribosomal protein S7, Putative, expressed	#N/A	#N/A	90.6806	176.723	1.94885	T	C	225
A2J10_06T0121600.1	mitochondrial ribosomal protein S7, Putative, expressed	#N/A	#N/A	90.6806	176.723	1.94885	T	G	97
A2J10_06T0121600.1	mitochondrial ribosomal protein S7, Putative, expressed	#N/A	#N/A	90.6806	176.723	1.94885	A	G	97
A2J10_06T0121600.1	mitochondrial ribosomal protein S7, Putative, expressed	#N/A	#N/A	90.6806	176.723	1.94885	T	G	97
A2J10_06T0121600.1	mitochondrial ribosomal protein S7, Putative, expressed	#N/A	#N/A	90.6806	176.723	1.94885	A	G	44.4146
A2J10_06T0121600.1	mitochondrial ribosomal protein S7, Putative, expressed	#N/A	#N/A	90.6806	176.723	1.94885	T	G	44.4146
A2J10_06T0121600.1	mitochondrial ribosomal protein S7, Putative, expressed	#N/A	#N/A	90.6806	176.723	1.94885	C	T	225
A2J10_06T0121600.1	mitochondrial ribosomal protein S7, Putative, expressed	#N/A	#N/A	90.6806	176.723	1.94885	T	G	125
A2J10_06T0121600.1	mitochondrial ribosomal protein S7, Putative, expressed	#N/A	#N/A	90.6806	176.723	1.94885	C	T	120
A2J10_06T0121600.1	mitochondrial ribosomal protein S7, Putative, expressed	#N/A	#N/A	90.6806	176.723	1.94885	T	C	80
A2J10_06T0121600.1	mitochondrial ribosomal protein S7, Putative, expressed	#N/A	#N/A	90.6806	176.723	1.94885	T	C	72
A2J10_06T0121600.1	mitochondrial ribosomal protein S7, Putative, expressed	#N/A	#N/A	90.6806	176.723	1.94885	T	G	60
A2J10_06T0121600.1	mitochondrial ribosomal protein S7, Putative, expressed	#N/A	#N/A	90.6806	176.723	1.94885	T	C	60
A2J10_06T0121600.1	mitochondrial ribosomal protein S7, Putative, expressed	#N/A	#N/A	90.6806	176.723	1.94885	A	G	60
A2J10_06T0121600.1	mitochondrial ribosomal protein S7, Putative, expressed	#N/A	#N/A	90.6806	176.723	1.94885	A	C	34.4159
A2J10_06T0121600.1	mitochondrial ribosomal protein S7, Putative, expressed	#N/A	#N/A	90.6806	176.723	1.94885	T	C	29.4193
A2J10_06T0121600.1	mitochondrial ribosomal protein S7, Putative, expressed	#N/A	#N/A	90.6806	176.723	1.94885	T	C	30.4183
A2J10_06T0121600.1	mitochondrial ribosomal protein S7, Putative, expressed	#N/A	#N/A	90.6806	176.723	1.94885	A	G	30.4183
A2J10_06T0121600.1	mitochondrial ribosomal protein S7, Putative, expressed	#N/A	#N/A	90.6806	176.723	1.94885	G	A	30.4183
A2J10_06T0121600.1	mitochondrial ribosomal protein S7, Putative, expressed	#N/A	#N/A	90.6806	176.723	1.94885	A	G	30.4183
A2J10_06T0121600.1	mitochondrial ribosomal protein S7, Putative, expressed	#N/A	#N/A	90.6806	176.723	1.94885	A	G	30.4183
A2J10_06T0121600.1	mitochondrial ribosomal protein S7, Putative, expressed	#N/A	#N/A	90.6806	176.723	1.94885	A	G	30.4183
A2J10_06T0121600.1	mitochondrial ribosomal protein S7, Putative, expressed	#N/A	#N/A	90.6806	176.723	1.94885	T	C	30.4183
A2J10_06T0121600.1	mitochondrial ribosomal protein S7, Putative, expressed	#N/A	#N/A	90.6806	176.723	1.94885	T	C	30.4183
A2J10_06T0121600.1	mitochondrial ribosomal protein S7, Putative, expressed	#N/A	#N/A	90.6806	176.723	1.94885	T	C	30.4183
A2J10_06T0121600.1	mitochondrial ribosomal protein S7, Putative, expressed	#N/A	#N/A	90.6806	176.723	1.94885	G	T	21.4455
A2J10_06T0121600.1	mitochondrial ribosomal protein S7, Putative, expressed	#N/A	#N/A	90.6806	176.723	1.94885	T	C	21.4455
A2J10_02T0332300.1	transmembrane 9 superfamily member, Putative, expressed	Putative CAMK_CAMK_like_unique.1 - CAMK includes calcium/calmodulin depedent protein kinases, expressed	Nonaspanin (TM9SF) family protein.	1.7125	3.33636	1.94825	G	T	30.4183
A2J10_03T0374600.1	heat shock protein DnaJ, Putative, expressed	#N/A	#N/A	3.0299	5.88862	1.9435	C	T	225
A2J10_03T0119500.1	ELMO/CED-12 family protein, Putative, expressed	ELMO/CED-12 family protein, Putative, expressed	Engulfment and cell motility, ELM domain containing protein.	2.60784	5.0629	1.94141	C	T	30.4183
A2J10_02T0378100.1	oxidoreductase/ transition metal ion binding protein, Putative, expressed	oxidoreductase/ transition metal ion binding protein, Putative, expressed	Conserved hypothetical protein.	0.846975	1.64065	1.93707	C	G	30.4183
A2J10_06T0222100.1	26S protease regulatory subunit S10B, Putative, expressed	26S protease regulatory subunit S10B, Putative, expressed	26S proteasome 19S regulatory particle triple-A ATPase subunit 4b	1.22806	2.37325	1.93252	C	T	30.4183
A2J10_02T0246900.1	nucleotide-sugar transporter family protein, Putative, expressed	nucleotide-sugar transporter family protein, Putative, expressed	Nucleotide-sugar transporter family protein.	0.935353	1.79693	1.92112	T	A	30.4183
A2J10_07T0054400.1	expressed protein	expressed protein	Vps51/Vps67 domain containing protein.	1.37265	2.63555	1.92005	T	C	114
A2J10_11T0104700.1	exosome complex exonuclease, Putative, expressed	#N/A	Exoribonuclease domain containing protein.	0.043222	0.082733	1.91414	G	A	30.4183
A2J10_12T0091900.1	retrotransposon protein, Putative, unclassified, expressed	#N/A	#N/A	0.077626	0.148255	1.90986	C	T	30.4183
A2J10_03T0016400.1	expressed protein	expressed protein	Conserved hypothetical protein.	0.078859	0.150332	1.90634	A	C	67
A2J10_03T0321700.1	Putative cytochrome b5-like Heme/Steroid binding domain containing protein, expressed	Putative cytochrome b5-like Heme/Steroid binding domain containing protein, expressed	#N/A	0.629839	1.20011	1.90542	G	C	30.4183
A2J10_04T0319700.1	protein binding protein, Putative, expressed	#N/A	#N/A	0.746128	1.41956	1.90257	T	A	30.4183
A2J10_12T0003600.1	expressed protein	expressed protein	Protein of unknown function DUF3133 domain containing protein.	2.28271	4.33864	1.90066	C	T	228
A2J10_05T0043400.1	ATP10 protein, expressed	ATP10 protein, expressed	ATP10 family protein.	0.506976	0.962636	1.89878	A	G	30.4183
A2J10_03T0102400.1	gamma-interferon-inducible lysosomal thiol reductase precursor, Putative, expressed	#N/A	#N/A	0.384885	0.730653	1.89837	C	T	30.4183
A2J10_12T0049400.1	Putative expressed protein	ATP synthase subunit beta, Putative, expressed	Similar to ribulose-1,5-bisphosphate carboxylase/oxygenase large subunit.	784.841	1488.54	1.89661	A	G	95
A2J10_12T0036400.1	glycosyl transferase, group 1 domain containing protein, expressed	glycosyl transferase, group 1 domain containing protein, expressed	Glycosyl transferase, group 1 domain containing protein.	0.496639	0.940145	1.89301	G	T	121
A2J10_12T0036400.1	glycosyl transferase, group 1 domain containing protein, expressed	glycosyl transferase, group 1 domain containing protein, expressed	Glycosyl transferase, group 1 domain containing protein.	0.496639	0.940145	1.89301	A	C	121
A2J10_12T0036400.1	glycosyl transferase, group 1 domain containing protein, expressed	glycosyl transferase, group 1 domain containing protein, expressed	Glycosyl transferase, group 1 domain containing protein.	0.496639	0.940145	1.89301	T	C	21.4455
A2J10_07T0164500.3	Putative CAMK_CAMK_like.33 - CAMK includes calcium/calmodulin depedent protein kinases, expressed	#N/A	#N/A	0.021275	0.040267	1.89269	A	C	30.4183
A2J10_07T0164500.3	Putative CAMK_CAMK_like.33 - CAMK includes calcium/calmodulin depedent protein kinases, expressed	#N/A	#N/A	0.021275	0.040267	1.89269	C	A	30.4183
A2J10_06T0128600.7	expressed protein	#N/A	#N/A	0.24667	0.465926	1.88886	G	A	28.2931
A2J10_01T0295100.1	wax synthase, Putative, expressed	wax synthase, Putative, expressed	Uncharacterised protein family UPF0089 domain containing protein.	1.0806	2.03997	1.88781	A	G	30.4183
A2J10_05T0154800.1	pentatricopeptide, Putative, expressed	pentatricopeptide, Putative, expressed	Pentatricopeptide repeat domain containing protein.	0.022906	0.043015	1.87789	T	G	30.4183
A2J10_04T0311600.1	LSM domain containing protein, expressed	SCP-like extracellular protein, expressed	Allergen V5/Tpx-1 related family protein.	2.29794	4.28994	1.86687	C	A	30.4183
A2J10_07T0276300.1	Conserved hypothetical protein	#N/A	#N/A	0.076194	0.141986	1.86348	C	G	30.4183
A2J10_12T0022800.1	nucleolar complex protein 2, Putative, expressed	#N/A	#N/A	0.730947	1.3605	1.86129	A	T	30.4183
A2J10_06T0075100.1	pro-resilin precursor, Putative, expressed	pro-resilin precursor, Putative, expressed	Similar to Pro-resilin.	13.4861	24.98	1.85227	C	A	30.4183
A2J10_02T0420900.1	1,3-beta-glucan synthase component domain containing protein, expressed	#N/A	#N/A	0.076542	0.141717	1.85149	T	C	30.4183
A2J10_09T0035900.1	Putative expressed protein	#N/A	#N/A	32.493	60.0673	1.84862	T	A	228
A2J10_09T0035900.1	Putative expressed protein	#N/A	#N/A	32.493	60.0673	1.84862	G	A	228
A2J10_09T0035900.1	Putative expressed protein	#N/A	#N/A	32.493	60.0673	1.84862	C	A	228
A2J10_09T0035900.1	Putative expressed protein	#N/A	#N/A	32.493	60.0673	1.84862	T	C	171
A2J10_09T0035900.1	Putative expressed protein	#N/A	#N/A	32.493	60.0673	1.84862	A	G	225
A2J10_09T0035900.1	Putative expressed protein	#N/A	#N/A	32.493	60.0673	1.84862	G	C	119
A2J10_09T0035900.1	Putative expressed protein	#N/A	#N/A	32.493	60.0673	1.84862	T	G	83
A2J10_09T0035900.1	Putative expressed protein	#N/A	#N/A	32.493	60.0673	1.84862	A	G	75
A2J10_09T0035900.1	Putative expressed protein	#N/A	#N/A	32.493	60.0673	1.84862	G	A	37.4152
A2J10_09T0035900.1	Putative expressed protein	#N/A	#N/A	32.493	60.0673	1.84862	T	C	34.4159
A2J10_06T0222800.1	SNF7 domain containing protein, Putative, expressed	#N/A	#N/A	2.96023	5.46596	1.84646	C	T	30.4183
A2J10_07T0008500.1	tetratricopeptide repeat domain containing protein, expressed	#N/A	#N/A	7.41921	13.6279	1.83684	G	A	24.1779
A2J10_09T0073700.1	COBW domain containing protein, Putative, expressed	COBW domain containing protein, Putative, expressed	PRLI-interacting factor L (Fragment).	10.7668	19.7612	1.83538	C	A	225
A2J10_11T0220500.1	glutathione peroxidase domain containing protein, expressed	#N/A	#N/A	0.759995	1.39373	1.83387	C	T	74
A2J10_11T0220500.1	glutathione peroxidase domain containing protein, expressed	#N/A	#N/A	0.759995	1.39373	1.83387	T	C	225
A2J10_11T0220500.1	glutathione peroxidase domain containing protein, expressed	#N/A	#N/A	0.759995	1.39373	1.83387	A	G	80
A2J10_04T0069700.1	Conserved hypothetical protein	#N/A	#N/A	70.0051	128.02	1.82872	G	A	228
A2J10_04T0069700.1	Conserved hypothetical protein	#N/A	#N/A	70.0051	128.02	1.82872	A	G	228
A2J10_04T0069700.1	Conserved hypothetical protein	#N/A	#N/A	70.0051	128.02	1.82872	C	T	225
A2J10_04T0069700.1	Conserved hypothetical protein	#N/A	#N/A	70.0051	128.02	1.82872	A	T	225
A2J10_04T0069700.1	Conserved hypothetical protein	#N/A	#N/A	70.0051	128.02	1.82872	A	G	225
A2J10_04T0069700.1	Conserved hypothetical protein	#N/A	#N/A	70.0051	128.02	1.82872	T	C	170
A2J10_04T0069700.1	Conserved hypothetical protein	#N/A	#N/A	70.0051	128.02	1.82872	A	G	161
A2J10_04T0069700.1	Conserved hypothetical protein	#N/A	#N/A	70.0051	128.02	1.82872	A	G	128
A2J10_04T0069700.1	Conserved hypothetical protein	#N/A	#N/A	70.0051	128.02	1.82872	G	A	37.4152
A2J10_08T0081900.1	sin-like protein conserved region containing protein, expressed	sin-like protein conserved region containing protein, expressed	#N/A	2.14077	3.90774	1.82539	A	G	30.4183
A2J10_11T0223700.1	Conserved hypothetical protein	expressed protein	Conserved hypothetical protein.	0.189992	0.346286	1.82263	G	A	30.4183
A2J10_02T0323800.1	DnaK family protein, Putative, expressed	DEAD-box ATP-dependent RNA helicase, Putative, expressed	Similar to ATP binding / ATP-dependent DNA helicase/ ATP-dependent helicase/ helicase/ nucleic acid binding.	2.09354	3.80851	1.81918	T	C	30.4183
A2J10_07T0249500.1	DEAD-box ATP-dependent RNA helicase, Putative, expressed	DEAD-box ATP-dependent RNA helicase, Putative, expressed	DEAD-box protein, DEAD-box RNA helicase, rRNA biogenesis, Gametophyte development	1.09732	1.97959	1.80402	A	G	30.4183
A2J10_07T0071100.1	SNF7 domain containing protein, Putative, expressed	SNF7 domain containing protein, Putative, expressed	Snf7 family protein.	0.972722	1.75208	1.80121	G	A	30.4183
A2J10_08T0049200.1	expressed protein	#N/A	#N/A	0.90822	1.63461	1.79979	G	T	30.4183
A2J10_03T0194900.1	RNA-binding protein-like, Putative, expressed	RNA-binding protein-like, Putative, expressed	RNA recognition motif domain domain containing protein.	1.82524	3.27895	1.79645	G	C	30.4183
A2J10_10T0154200.2	DNA excision repair protein ERCC-1, Putative, expressed	#N/A	#N/A	0.983771	1.75804	1.78704	A	C	145
A2J10_10T0154200.2	DNA excision repair protein ERCC-1, Putative, expressed	#N/A	#N/A	0.983771	1.75804	1.78704	A	T	117
A2J10_10T0154200.2	DNA excision repair protein ERCC-1, Putative, expressed	#N/A	#N/A	0.983771	1.75804	1.78704	T	C	88
A2J10_10T0154200.2	DNA excision repair protein ERCC-1, Putative, expressed	#N/A	#N/A	0.983771	1.75804	1.78704	A	G	86
A2J10_04T0230300.1	Conserved hypothetical protein	#N/A	#N/A	0.091757	0.163378	1.78055	G	A	37.4152
A2J10_03T0282900.1	zinc finger family protein, Putative, expressed	zinc finger family protein, Putative, expressed	Ankyrin domain containing protein.	2.18182	3.88128	1.77892	C	G	30.4183
A2J10_06T0239400.1	protein kinase domain containing protein, expressed	protein kinase domain containing protein, expressed	Protein kinase, core domain containing protein.	2.79832	4.9712	1.7765	T	C	60
A2J10_06T0239400.1	protein kinase domain containing protein, expressed	protein kinase domain containing protein, expressed	Protein kinase, core domain containing protein.	2.79832	4.9712	1.7765	A	G	57
A2J10_06T0239400.1	protein kinase domain containing protein, expressed	protein kinase domain containing protein, expressed	Protein kinase, core domain containing protein.	2.79832	4.9712	1.7765	T	G	52
A2J10_06T0083900.1	Putative dehydrogenase E1 component domain containing protein, expressed	dehydrogenase E1 component domain containing protein, expressed	Similar to Pyruvate dehydrogenase E1 component alpha subunit, mitochondrial precursor (EC 1.2.4.1) (PDHE1-A).	0.06864	0.120755	1.75925	A	G	30.4183
A2J10_02T0191400.1	protein kinase domain containing protein, expressed	protein kinase domain containing protein, expressed	Similar to Receptor protein kinase-like protein.	1.99743	3.49937	1.75194	A	T	21.4455
A2J10_05T0116900.1	MEE12, Putative, expressed	#N/A	#N/A	0.17991	0.315044	1.75112	G	T	30.4183
A2J10_02T0377400.1	DnaK family protein, Putative, expressed	DnaK family protein, Putative, expressed	Similar to Heat shock 70 kDa protein, mitochondrial precursor.	10.0207	17.5473	1.75111	T	C	225
A2J10_03T0322700.1	NLI interacting factor-like phosphatase, Putative, expressed	#N/A	Similar to 36I5.7.	0.519403	0.907842	1.74786	A	G	34.4159
A2J10_02T0214000.1	MYB family transcription factor, Putative, expressed	#N/A	#N/A	1.96587	3.43303	1.74632	T	G	159
A2J10_02T0214000.1	MYB family transcription factor, Putative, expressed	#N/A	#N/A	1.96587	3.43303	1.74632	T	C	97
A2J10_05T0145300.1	Putative AP2 domain containing protein, expressed	Putative AP2 domain containing protein, expressed	Similar to AP2-1 protein (Fragment).	1.10464	1.92884	1.74613	A	T	30.4183
A2J10_03T0002400.1	KIP1, Putative, expressed	KIP1, Putative, expressed	Hypothetical conserved gene.	3.41099	5.95161	1.74483	A	G	30.4183
A2J10_07T0295000.1	PMR5, Putative, expressed	expressed protein	Similar to ESK1 (ESKIMO 1).	0.623711	1.08572	1.74075	T	C	30.4183
A2J10_07T0004900.1	VIP4, Putative, expressed	#N/A	#N/A	2.10486	3.65479	1.73636	T	C	30.4183
A2J10_09T0117500.1	BTBN19 - Bric-a-Brac, Tramtrack, Broad Complex BTB domain with non-phototropic hypocotyl 3 NPH3 domain,expressed	BTBN19 - Bric-a-Brac, Tramtrack, Broad Complex BTB domain with non-phototropic hypocotyl 3 NPH3 domain,expressed	BTB domain containing protein.	0.310367	0.538572	1.73527	C	A	30.4183
A2J10_03T0340500.1	PLA IIIA/PLP7, Putative, expressed	#N/A	#N/A	0.058924	0.101983	1.73075	G	A	30.4183
A2J10_04T0253900.1	Conserved hypothetical protein	#N/A	#N/A	0.563812	0.971793	1.72361	T	C	189
A2J10_04T0253900.1	Conserved hypothetical protein	#N/A	#N/A	0.563812	0.971793	1.72361	A	G	188
A2J10_04T0253900.1	Conserved hypothetical protein	#N/A	#N/A	0.563812	0.971793	1.72361	A	G	148
A2J10_04T0253900.1	Conserved hypothetical protein	#N/A	#N/A	0.563812	0.971793	1.72361	T	C	142
A2J10_04T0253900.1	Conserved hypothetical protein	#N/A	#N/A	0.563812	0.971793	1.72361	A	G	128
A2J10_04T0253900.1	Conserved hypothetical protein	#N/A	#N/A	0.563812	0.971793	1.72361	T	C	127
A2J10_04T0253900.1	Conserved hypothetical protein	#N/A	#N/A	0.563812	0.971793	1.72361	T	C	122
A2J10_04T0253900.1	Conserved hypothetical protein	#N/A	#N/A	0.563812	0.971793	1.72361	T	C	122
A2J10_04T0253900.1	Conserved hypothetical protein	#N/A	#N/A	0.563812	0.971793	1.72361	G	A	97
A2J10_04T0253900.1	Conserved hypothetical protein	#N/A	#N/A	0.563812	0.971793	1.72361	A	T	97
A2J10_04T0253900.1	Conserved hypothetical protein	#N/A	#N/A	0.563812	0.971793	1.72361	A	G	96
A2J10_04T0253900.1	Conserved hypothetical protein	#N/A	#N/A	0.563812	0.971793	1.72361	A	G	60
A2J10_04T0253900.1	Conserved hypothetical protein	#N/A	#N/A	0.563812	0.971793	1.72361	T	C	37.4152
A2J10_03T0395500.1	major facilitator superfamily antiporter, Putative, expressed	#N/A	#N/A	0.040788	0.070299	1.72352	A	G	44.4146
A2J10_03T0395500.1	major facilitator superfamily antiporter, Putative, expressed	#N/A	#N/A	0.040788	0.070299	1.72352	T	C	44.4146
A2J10_10T0107900.1	Putative expressed protein	#N/A	#N/A	0.155772	0.268212	1.72182	A	C	30.4183
A2J10_02T0060900.1	CUE domain containing protein, expressed	CUE domain containing protein, expressed	Similar to CUE domain containing protein.	5.21558	8.9774	1.72126	G	A	41.4148
A2J10_11T0218900.1	Hypothetical protein	#N/A	#N/A	0.007085	0.0121	1.70783	C	T	225
A2J10_01T0369200.1	tRNA synthetases class II domain containing protein, expressed	tRNA synthetases class II domain containing protein, expressed	Similar to Aspartyl-tRNA synthetase (EC 6.1.1.12) (Aspartate--tRNA ligase) (AspRS).	3.8211	6.51433	1.70483	C	G	30.4183
A2J10_06T0133500.3	DTW domain containing protein, Putative, expressed	DTW domain containing protein, Putative, expressed	Similar to predicted protein.	0.280513	0.477598	1.70259	C	A	30.4183
A2J10_03T0306000.1	aminotransferase domain containing protein, Putative, expressed	#N/A	#N/A	1.23215	2.09549	1.70067	C	A	30.4183
A2J10_03T0182500.1	1-phosphatidylinositol-4-phosphate 5-kinase/ zinc ion binding protein, Putative, expressed	#N/A	#N/A	2.72861	4.63796	1.69975	G	T	30.4183
A2J10_04T0282300.1	oligosaccharyl transferase, Putative, expressed	oligosaccharyl transferase, Putative, expressed	Similar to Itm1 protein.	2.49206	4.22916	1.69705	C	T	225
A2J10_04T0314200.1	radical SAM enzyme, Putative, expressed	radical SAM enzyme, Putative, expressed	Similar to Lipoic acid synthetase, mitochondrial precursor (Lip-syn) (Lipoate synthase) (mLIP1).	3.78857	6.4263	1.69624	C	A	30.4183
A2J10_03T0354600.1	Conserved hypothetical protein	Conserved hypothetical protein	Hypothetical conserved gene.	3.35846	5.69346	1.69526	G	A	30.4183
A2J10_03T0354600.1	Conserved hypothetical protein	Conserved hypothetical protein	Hypothetical conserved gene.	3.35846	5.69346	1.69526	G	A	30.4183
A2J10_04T0196000.1	amine oxidase, Putative, expressed	amine oxidase, Putative, expressed	Similar to flowering locus D.	0.325926	0.552167	1.69415	A	G	30.4183
A2J10_03T0089700.3	peptide transporter, Putative, expressed	#N/A	#N/A	0.315973	0.534389	1.69125	C	A	30.4183
A2J10_06T0059700.1	PHD-finger domain containing protein, Putative, expressed	#N/A	#N/A	0.007123	0.012008	1.68581	C	A	30.4183
A2J10_07T0273500.1	cis-zeatin O-glucosyltransferase, Putative, expressed	RNA pseudouridine synthase, Putative, expressed	Similar to pseudouridine synthase family protein.	0.251333	0.423586	1.68536	G	A	30.4183
A2J10_07T0273500.1	cis-zeatin O-glucosyltransferase, Putative, expressed	RNA pseudouridine synthase, Putative, expressed	Similar to pseudouridine synthase family protein.	0.251333	0.423586	1.68536	C	A	30.4183
A2J10_04T0325500.1	Putative SNF2 family N-terminal domain containing protein, expressed	Putative SNF2 family N-terminal domain containing protein, expressed	SNF2 family chromatin-remodeling helicase, Syncytial endosperm development	0.235014	0.396081	1.68535	C	G	30.4183
A2J10_02T0287900.3	OsSub19 - Putative Subtilisin homologue, expressed	OsSub19 - Putative Subtilisin homologue, expressed	Peptidase S8 and S53, subtilisin, kexin, sedolisin domain containing protein.	0.077728	0.130552	1.6796	G	A	80
A2J10_02T0007200.1	tetratricopeptide repeat domain containing protein, expressed	tetratricopeptide repeat domain containing protein, expressed	Tetratricopeptide-like helical domain containing protein.	2.84732	4.7725	1.67613	T	A	30.4183
A2J10_11T0117400.2	phospholipid-transporting ATPase 2, Putative, expressed	phospholipid-transporting ATPase 2, Putative, expressed	Similar to Phospholipid-translocating P-type ATPase, flippase family protein, expressed.	0.095415	0.159341	1.66998	G	C	30.4183
A2J10_02T0236300.1	glycerophosphoryl diester phosphodiesterase family protein, Putative, expressed	glycerophosphoryl diester phosphodiesterase family protein, Putative, expressed	Hypothetical conserved gene.	0.559921	0.932776	1.66591	T	A	30.4183
A2J10_06T0136800.1	Conserved hypothetical protein	#N/A	#N/A	0.228102	0.379779	1.66495	A	G	30.4183
A2J10_01T0125600.1	Conserved hypothetical protein	Conserved hypothetical protein	#N/A	0.221633	0.368431	1.66235	G	A	30.4183
A2J10_07T0289300.1	Myb transcription factor, Putative, expressed	Myb transcription factor, Putative, expressed	Similar to Phosphate starvation regulator protein (Regulatory protein of P- starvation acclimation response Psr1).	0.525497	0.871433	1.6583	G	A	30.4183
A2J10_07T0289300.1	Myb transcription factor, Putative, expressed	Myb transcription factor, Putative, expressed	Similar to Phosphate starvation regulator protein (Regulatory protein of P- starvation acclimation response Psr1).	0.525497	0.871433	1.6583	C	A	21.4455
A2J10_11T0153600.1	Putative plant protein of unknown function domain containing protein, expressed	plant protein of unknown function domain containing protein, expressed	Protein of unknown function DUF247, plant family protein.	0.734888	1.21859	1.6582	G	A	30.4183
A2J10_11T0105300.1	Conserved hypothetical protein	#N/A	#N/A	0.296022	0.48818	1.64913	T	A	30.4183
A2J10_09T0137300.1	1-aminocyclopropane-1-carboxylate oxidase protein, Putative, expressed	1-aminocyclopropane-1-carboxylate oxidase protein, Putative, expressed	ACC oxidase, Ethylene biosynthesis	7.4782	12.3081	1.64586	C	G	228
A2J10_09T0137300.1	1-aminocyclopropane-1-carboxylate oxidase protein, Putative, expressed	1-aminocyclopropane-1-carboxylate oxidase protein, Putative, expressed	ACC oxidase, Ethylene biosynthesis	7.4782	12.3081	1.64586	T	G	114
A2J10_09T0137300.1	1-aminocyclopropane-1-carboxylate oxidase protein, Putative, expressed	1-aminocyclopropane-1-carboxylate oxidase protein, Putative, expressed	ACC oxidase, Ethylene biosynthesis	7.4782	12.3081	1.64586	C	T	21.6899
A2J10_09T0034100.1	4-nitrophenylphosphatase, Putative, expressed	#N/A	Similar to 4-nitrophenylphosphatase.	3.64177	5.98585	1.64366	C	T	60
A2J10_03T0074300.1	beclin-1, Putative, expressed	#N/A	#N/A	0.079211	0.130165	1.64327	A	T	30.4183
A2J10_06T0222600.1	elongation factor, Putative, expressed	elongation factor, Putative, expressed	Similar to Small nuclear ribonucleoprotein component.	2.75023	4.51271	1.64085	A	T	30.4183
A2J10_08T0227700.1	26S proteasome non-ATPase regulatory subunit 3, Putative, expressed	26S proteasome non-ATPase regulatory subunit 3, Putative, expressed	26S proteasome 19S regulatory particle non-ATPase subunit 3	3.74465	6.14111	1.63997	G	A	32.4168
A2J10_08T0227700.1	26S proteasome non-ATPase regulatory subunit 3, Putative, expressed	26S proteasome non-ATPase regulatory subunit 3, Putative, expressed	26S proteasome 19S regulatory particle non-ATPase subunit 3	3.74465	6.14111	1.63997	T	A	32.4168
A2J10_07T0192500.1	amino acid kinase, Putative, expressed	amino acid kinase, Putative, expressed	Similar to OSIGBa0142C11.1 protein.	1.72389	2.82372	1.63799	A	T	30.4183
A2J10_03T0091400.1	homeobox domain containing protein, expressed	homeobox domain containing protein, expressed	Similar to Flowering-time protein isoform alpha.	2.39899	3.90165	1.62637	C	G	30.4183
A2J10_04T0214300.1	Putative protein kinase domain containing protein, expressed	#N/A	#N/A	0.657552	1.06198	1.61506	G	T	30.4183
A2J10_05T0098100.1	expressed protein	expressed protein	Cell division cycle-associated protein domain containing protein.	2.13937	3.4547	1.61482	G	A	182
A2J10_01T0505300.1	expressed protein	expressed protein	Glycoside hydrolase, family 15 domain containing protein.	3.97995	6.42461	1.61424	G	T	30.4183
A2J10_11T0019900.1	HEAT repeat family protein, Putative, expressed	#N/A	Armadillo-type fold domain containing protein.	1.50329	2.42397	1.61245	C	G	30.4183
A2J10_04T0200400.1	SNF2 family N-terminal domain containing protein, expressed	#N/A	#N/A	1.18139	1.90331	1.61107	T	A	30.4183
A2J10_04T0220600.2	elongation factor Tu, Putative, expressed	#N/A	#N/A	0.64685	1.04193	1.61078	A	G	45.8804
A2J10_04T0294800.1	glycosyl transferase, family 8, Putative, expressed	#N/A	#N/A	0.03879	0.062373	1.60797	A	G	30.4183
A2J10_07T0038000.1	Conserved hypothetical protein	#N/A	#N/A	0.083543	0.134137	1.6056	C	G	30.4183
A2J10_02T0332000.1	GPI-anchored protein, Putative, expressed	GPI-anchored protein, Putative, expressed	Similar to Gpi-anchored protein (Fragment).	2.99614	4.8054	1.60387	G	T	30.4183
A2J10_07T0293000.1	expressed protein	#N/A	#N/A	6.3e-05	0.0001	1.5873	G	A	30.4183
A2J10_07T0033200.1	MBTB13 - Bric-a-Brac, Tramtrack, Broad Complex BTB domain with Meprin and TRAF Homology MATH domain, expressed	MBTB3 - Bric-a-Brac, Tramtrack, Broad Complex BTB domain with Meprin and TRAF Homology MATH domain, expressed	Similar to Zinc finger POZ domain protein (Fragment).	2.00218	3.17566	1.5861	T	C	30.4183
A2J10_05T0162300.1	No apical meristem protein, Putative, expressed	#N/A	#N/A	0.127067	0.200769	1.58002	C	T	30.4183
A2J10_01T0037500.1	PPR repeat domain containing protein, Putative, expressed	PPR repeat domain containing protein, Putative, expressed	Pentatricopeptide repeat domain containing protein.	0.077612	0.122578	1.57937	A	G	213
A2J10_01T0037500.1	PPR repeat domain containing protein, Putative, expressed	PPR repeat domain containing protein, Putative, expressed	Pentatricopeptide repeat domain containing protein.	0.077612	0.122578	1.57937	A	C	225
A2J10_01T0037500.1	PPR repeat domain containing protein, Putative, expressed	PPR repeat domain containing protein, Putative, expressed	Pentatricopeptide repeat domain containing protein.	0.077612	0.122578	1.57937	C	T	217
A2J10_01T0037500.1	PPR repeat domain containing protein, Putative, expressed	PPR repeat domain containing protein, Putative, expressed	Pentatricopeptide repeat domain containing protein.	0.077612	0.122578	1.57937	A	T	195
A2J10_01T0037500.1	PPR repeat domain containing protein, Putative, expressed	PPR repeat domain containing protein, Putative, expressed	Pentatricopeptide repeat domain containing protein.	0.077612	0.122578	1.57937	A	C	140
A2J10_01T0037500.1	PPR repeat domain containing protein, Putative, expressed	PPR repeat domain containing protein, Putative, expressed	Pentatricopeptide repeat domain containing protein.	0.077612	0.122578	1.57937	T	C	140
A2J10_01T0301100.1	Putative Protein kinase domain containing protein, expressed	#N/A	#N/A	0.97837	1.54267	1.57678	A	T	30.4183
A2J10_02T0174700.1	Hypothetical protein	#N/A	Hypothetical genes.	0.11496	0.181013	1.57457	C	G	30.4183
A2J10_10T0045000.1	OsFBX379 - F-box domain containing protein, expressed	Putative OsFBX379 - F-box domain containing protein, expressed	Similar to F-box domain containing protein, expressed.	0.360976	0.567671	1.5726	T	C	30.4183
A2J10_04T0007900.1	disease resistance protein RPM1, Putative, expressed	#N/A	#N/A	0.12397	0.193269	1.559	A	T	30.4183
A2J10_01T0200200.1	NADPH-dependent oxidoreductase, Putative, expressed	#N/A	#N/A	73.9252	115.16	1.55779	T	C	228
A2J10_01T0200200.1	NADPH-dependent oxidoreductase, Putative, expressed	#N/A	#N/A	73.9252	115.16	1.55779	C	T	228
A2J10_01T0200200.1	NADPH-dependent oxidoreductase, Putative, expressed	#N/A	#N/A	73.9252	115.16	1.55779	T	G	225
A2J10_01T0200200.1	NADPH-dependent oxidoreductase, Putative, expressed	#N/A	#N/A	73.9252	115.16	1.55779	A	G	225
A2J10_10T0080400.1	NADPH-dependent oxidoreductase, Putative, expressed	#N/A	#N/A	388.765	603.963	1.55354	T	A	26.6123
A2J10_06T0157300.1	OsClp9 - Putative Clp protease homologue, expressed	OsClp9 - Putative Clp protease homologue, expressed	Peptidase S14, ClpP family protein.	8.46418	13.0854	1.54597	T	C	36.4154
A2J10_02T0416100.1	DEAD-box ATP-dependent RNA helicase, Putative, expressed	DEAD-box ATP-dependent RNA helicase, Putative, expressed	DEAD-like helicase, N-terminal domain containing protein.	1.52369	2.33115	1.52994	C	A	30.4183
A2J10_04T0041700.1	flavin-containing monooxygenase family protein, Putative, expressed	flavin-containing monooxygenase family protein, Putative, expressed	Dimethylaniline monooxygenase, N-oxide-forming domain containing protein.	0.073243	0.112049	1.52983	T	C	30.4183
A2J10_04T0041700.1	flavin-containing monooxygenase family protein, Putative, expressed	flavin-containing monooxygenase family protein, Putative, expressed	Dimethylaniline monooxygenase, N-oxide-forming domain containing protein.	0.073243	0.112049	1.52983	G	A	30.4183
A2J10_09T0082400.1	holocarboxylase synthetase, Putative, expressed	holocarboxylase synthetase, Putative, expressed	Uncharacterised conserved protein UCP009193 domain containing protein.	1.88376	2.88049	1.52911	C	T	67
A2J10_08T0014500.1	zinc finger family protein, Putative, expressed	zinc finger family protein, Putative, expressed	Protein of unknown function DUF23 family protein.	0.848773	1.29141	1.5215	T	C	225
A2J10_08T0014500.1	zinc finger family protein, Putative, expressed	zinc finger family protein, Putative, expressed	Protein of unknown function DUF23 family protein.	0.848773	1.29141	1.5215	T	C	181
A2J10_06T0206200.1	Hypothetical protein	#N/A	#N/A	0.109804	0.166762	1.51872	G	A	30.4183
A2J10_12T0091000.1	ubiquitin-protein ligase 1, Putative, expressed	ubiquitin-protein ligase 1, Putative, expressed	HECT-domain E3 ubiquitin ligase, Control of panicle size and grain number	20.0137	30.3666	1.51729	T	C	30.4183
A2J10_09T0014100.1	DAG protein, chloroplast precursor, Putative, expressed	DAG protein, chloroplast precursor, Putative, expressed	Similar to DAG protein.	4.4723	6.78434	1.51697	C	A	30.4183
A2J10_08T0032900.1	nucleolar GTP-binding protein 1, Putative, expressed	#N/A	#N/A	1.52845	2.31226	1.51282	G	C	30.4183
A2J10_06T0275100.1	phytosulfokine receptor precursor, Putative, expressed	serine/threonine-protein kinase BRI1-like 2 precursor, Putative, expressed	Protein kinase, catalytic domain domain containing protein.	0.124792	0.188318	1.50906	C	T	184
A2J10_06T0275100.1	phytosulfokine receptor precursor, Putative, expressed	serine/threonine-protein kinase BRI1-like 2 precursor, Putative, expressed	Protein kinase, catalytic domain domain containing protein.	0.124792	0.188318	1.50906	A	T	157
A2J10_06T0275100.1	phytosulfokine receptor precursor, Putative, expressed	serine/threonine-protein kinase BRI1-like 2 precursor, Putative, expressed	Protein kinase, catalytic domain domain containing protein.	0.124792	0.188318	1.50906	C	G	139
A2J10_06T0275100.1	phytosulfokine receptor precursor, Putative, expressed	serine/threonine-protein kinase BRI1-like 2 precursor, Putative, expressed	Protein kinase, catalytic domain domain containing protein.	0.124792	0.188318	1.50906	C	T	80
A2J10_06T0275100.1	phytosulfokine receptor precursor, Putative, expressed	serine/threonine-protein kinase BRI1-like 2 precursor, Putative, expressed	Protein kinase, catalytic domain domain containing protein.	0.124792	0.188318	1.50906	T	C	80
A2J10_06T0275100.1	phytosulfokine receptor precursor, Putative, expressed	serine/threonine-protein kinase BRI1-like 2 precursor, Putative, expressed	Protein kinase, catalytic domain domain containing protein.	0.124792	0.188318	1.50906	G	A	80
A2J10_06T0275100.1	phytosulfokine receptor precursor, Putative, expressed	serine/threonine-protein kinase BRI1-like 2 precursor, Putative, expressed	Protein kinase, catalytic domain domain containing protein.	0.124792	0.188318	1.50906	T	C	30.4183
A2J10_01T0371000.1	ATP synthase, A subunit family protein, Putative, expressed	ATP synthase, A subunit family protein, Putative, expressed	Similar to ATP synthase F0 subunit 6.	278.697	420.497	1.5088	C	T	228
A2J10_01T0371000.1	ATP synthase, A subunit family protein, Putative, expressed	ATP synthase, A subunit family protein, Putative, expressed	Similar to ATP synthase F0 subunit 6.	278.697	420.497	1.5088	C	T	228
A2J10_01T0371000.1	ATP synthase, A subunit family protein, Putative, expressed	ATP synthase, A subunit family protein, Putative, expressed	Similar to ATP synthase F0 subunit 6.	278.697	420.497	1.5088	C	T	228
A2J10_01T0371000.1	ATP synthase, A subunit family protein, Putative, expressed	ATP synthase, A subunit family protein, Putative, expressed	Similar to ATP synthase F0 subunit 6.	278.697	420.497	1.5088	C	T	228
A2J10_01T0371000.1	ATP synthase, A subunit family protein, Putative, expressed	ATP synthase, A subunit family protein, Putative, expressed	Similar to ATP synthase F0 subunit 6.	278.697	420.497	1.5088	C	T	228
A2J10_01T0371000.1	ATP synthase, A subunit family protein, Putative, expressed	ATP synthase, A subunit family protein, Putative, expressed	Similar to ATP synthase F0 subunit 6.	278.697	420.497	1.5088	C	T	228
A2J10_01T0371000.1	ATP synthase, A subunit family protein, Putative, expressed	ATP synthase, A subunit family protein, Putative, expressed	Similar to ATP synthase F0 subunit 6.	278.697	420.497	1.5088	C	T	228
A2J10_01T0371000.1	ATP synthase, A subunit family protein, Putative, expressed	ATP synthase, A subunit family protein, Putative, expressed	Similar to ATP synthase F0 subunit 6.	278.697	420.497	1.5088	C	T	228
A2J10_01T0371000.1	ATP synthase, A subunit family protein, Putative, expressed	ATP synthase, A subunit family protein, Putative, expressed	Similar to ATP synthase F0 subunit 6.	278.697	420.497	1.5088	C	T	228
A2J10_01T0371000.1	ATP synthase, A subunit family protein, Putative, expressed	ATP synthase, A subunit family protein, Putative, expressed	Similar to ATP synthase F0 subunit 6.	278.697	420.497	1.5088	C	T	221
A2J10_01T0371000.1	ATP synthase, A subunit family protein, Putative, expressed	ATP synthase, A subunit family protein, Putative, expressed	Similar to ATP synthase F0 subunit 6.	278.697	420.497	1.5088	C	T	165
A2J10_01T0371000.1	ATP synthase, A subunit family protein, Putative, expressed	ATP synthase, A subunit family protein, Putative, expressed	Similar to ATP synthase F0 subunit 6.	278.697	420.497	1.5088	C	T	161
A2J10_01T0371000.1	ATP synthase, A subunit family protein, Putative, expressed	ATP synthase, A subunit family protein, Putative, expressed	Similar to ATP synthase F0 subunit 6.	278.697	420.497	1.5088	C	T	148
A2J10_01T0371000.1	ATP synthase, A subunit family protein, Putative, expressed	ATP synthase, A subunit family protein, Putative, expressed	Similar to ATP synthase F0 subunit 6.	278.697	420.497	1.5088	C	T	128
A2J10_01T0371000.1	ATP synthase, A subunit family protein, Putative, expressed	ATP synthase, A subunit family protein, Putative, expressed	Similar to ATP synthase F0 subunit 6.	278.697	420.497	1.5088	C	T	95
A2J10_01T0371000.1	ATP synthase, A subunit family protein, Putative, expressed	ATP synthase, A subunit family protein, Putative, expressed	Similar to ATP synthase F0 subunit 6.	278.697	420.497	1.5088	C	T	75
A2J10_01T0371000.1	ATP synthase, A subunit family protein, Putative, expressed	ATP synthase, A subunit family protein, Putative, expressed	Similar to ATP synthase F0 subunit 6.	278.697	420.497	1.5088	C	T	46.0294
A2J10_01T0267600.1	NADPH-dependent oxidoreductase, Putative, expressed	#N/A	#N/A	22.7891	34.2891	1.50463	C	T	228
A2J10_01T0267600.1	NADPH-dependent oxidoreductase, Putative, expressed	#N/A	#N/A	22.7891	34.2891	1.50463	C	T	155
A2J10_03T0070500.1	calcium-binding EF hand family protein, Putative, expressed	#N/A	#N/A	0.6049	0.907918	1.50094	G	C	34.4159
A2J10_08T0093500.1	Conserved hypothetical protein	#N/A	#N/A	20.7167	31.0618	1.49936	T	C	209
A2J10_02T0313600.1	expressed protein	expressed protein	Conserved hypothetical protein.	5.70451	8.52672	1.49473	T	C	30.4183
A2J10_08T0187500.1	pentatricopeptide, Putative, expressed	pentatricopeptide, Putative, expressed	Pentatricopeptide repeat domain containing protein.	0.065708	0.097965	1.49091	G	A	30.4183
A2J10_05T0114800.1	expressed protein	expressed protein	#N/A	1.85989	2.77126	1.49001	G	C	225
A2J10_05T0114800.1	expressed protein	expressed protein	#N/A	1.85989	2.77126	1.49001	A	G	225
A2J10_05T0114800.1	expressed protein	expressed protein	#N/A	1.85989	2.77126	1.49001	C	G	140
A2J10_11T0089500.1	survival motor neuron containing protein, expressed	survival motor neuron containing protein, expressed	Survival motor neuron interacting protein 1 family protein.	0.236449	0.35131	1.48577	G	A	30.4183
A2J10_05T0025000.1	expressed protein	Putative expressed protein	Hypothetical conserved gene.	1.05214	1.56104	1.48369	G	A	30.4183
A2J10_03T0108500.1	DNAJ heat shock N-terminal domain-containing protein, Putative, expressed	#N/A	Hypothetical conserved gene.	0.148619	0.220443	1.48328	C	T	30.4183
A2J10_02T0278600.1	OsFtsH7 FtsH protease, homologue of AtFtsH7, expressed	#N/A	#N/A	13.4039	19.8316	1.47954	G	T	30.4183
A2J10_01T0192600.1	AP-3 complex subunit delta, Putative, expressed	AP-3 complex subunit delta, Putative, expressed	Armadillo-type fold domain containing protein.	1.35548	2.00376	1.47827	C	T	30.4183
A2J10_04T0213800.1	ZR1 protein, Putative, expressed	#N/A	#N/A	0.190066	0.280627	1.47647	G	A	30.4183
A2J10_02T0412900.1	Conserved hypothetical protein	#N/A	#N/A	4.88795	7.20989	1.47504	A	G	30.4183
A2J10_10T0084900.1	N-dimethylguanosine tRNA methyltransferase, Putative, expressed	N-dimethylguanosine tRNA methyltransferase, Putative, expressed	N2,N2-dimethylguanosine tRNA methyltransferase family protein.	0.403487	0.593865	1.47183	A	T	30.4183
A2J10_08T0191600.1	coiled-coil domain containing 49, Putative, expressed	coiled-coil domain containing 49, Putative, expressed	CBF1-interacting co-repressor CIR, N-terminal domain containing protein.	3.50733	5.15883	1.47087	G	A	44.4146
A2J10_09T0035300.1	Conserved hypothetical protein	#N/A	#N/A	5.91792	8.67243	1.46545	A	G	225
A2J10_09T0035300.1	Conserved hypothetical protein	#N/A	#N/A	5.91792	8.67243	1.46545	T	C	225
A2J10_09T0035300.1	Conserved hypothetical protein	#N/A	#N/A	5.91792	8.67243	1.46545	T	C	225
A2J10_09T0035300.1	Conserved hypothetical protein	#N/A	#N/A	5.91792	8.67243	1.46545	T	C	210
A2J10_03T0236100.1	Conserved hypothetical protein	#N/A	#N/A	4.1504	6.07788	1.46441	C	T	225
A2J10_03T0236100.1	Conserved hypothetical protein	#N/A	#N/A	4.1504	6.07788	1.46441	T	C	225
A2J10_03T0236100.1	Conserved hypothetical protein	#N/A	#N/A	4.1504	6.07788	1.46441	G	C	225
A2J10_03T0236100.1	Conserved hypothetical protein	#N/A	#N/A	4.1504	6.07788	1.46441	A	G	100
A2J10_03T0236100.1	Conserved hypothetical protein	#N/A	#N/A	4.1504	6.07788	1.46441	C	T	100
A2J10_03T0236100.1	Conserved hypothetical protein	#N/A	#N/A	4.1504	6.07788	1.46441	T	A	125
A2J10_03T0236100.1	Conserved hypothetical protein	#N/A	#N/A	4.1504	6.07788	1.46441	A	G	122
A2J10_03T0236100.1	Conserved hypothetical protein	#N/A	#N/A	4.1504	6.07788	1.46441	A	G	122
A2J10_03T0236100.1	Conserved hypothetical protein	#N/A	#N/A	4.1504	6.07788	1.46441	T	C	120
A2J10_03T0236100.1	Conserved hypothetical protein	#N/A	#N/A	4.1504	6.07788	1.46441	A	T	104
A2J10_03T0236100.1	Conserved hypothetical protein	#N/A	#N/A	4.1504	6.07788	1.46441	A	C	104
A2J10_03T0236100.1	Conserved hypothetical protein	#N/A	#N/A	4.1504	6.07788	1.46441	T	C	30.4183
A2J10_03T0236100.1	Conserved hypothetical protein	#N/A	#N/A	4.1504	6.07788	1.46441	A	G	30.4183
A2J10_11T0035900.1	Putative expressed protein	expressed protein	NB-ARC domain containing protein.	0.472824	0.69226	1.4641	C	T	30.4183
A2J10_03T0239200.1	prefoldin subunit, Putative, expressed	prefoldin subunit, Putative, expressed	Prefoldin domain containing protein.	2.22165	3.25178	1.46368	C	G	104
A2J10_11T0191200.1	heat shock protein DnaJ, Putative, expressed	heat shock protein DnaJ, Putative, expressed	Similar to DnaJ domain containing protein, expressed.	5.25518	7.67731	1.4609	C	G	30.4183
A2J10_02T0070800.1	expressed protein	expressed protein	Protein of unknown function DUF1677, Oryza sativa family protein.	0.372319	0.542225	1.45635	T	C	76
A2J10_07T0187300.1	DUF1399 containing protein, Putative, expressed	#N/A	#N/A	73.3512	105.885	1.44353	T	A	97
A2J10_07T0187300.1	DUF1399 containing protein, Putative, expressed	#N/A	#N/A	73.3512	105.885	1.44353	G	A	66
A2J10_07T0187300.1	DUF1399 containing protein, Putative, expressed	#N/A	#N/A	73.3512	105.885	1.44353	T	C	63
A2J10_07T0187300.1	DUF1399 containing protein, Putative, expressed	#N/A	#N/A	73.3512	105.885	1.44353	T	C	58
A2J10_07T0187300.1	DUF1399 containing protein, Putative, expressed	#N/A	#N/A	73.3512	105.885	1.44353	G	A	34.4159
A2J10_04T0223200.1	GPR89A, Putative, expressed	#N/A	#N/A	0.049872	0.071905	1.44179	A	G	30.4183
A2J10_06T0099000.1	receptor-like protein kinase 2 precursor, Putative, expressed	receptor-like protein kinase 2 precursor, Putative, expressed	Leucine rich-repeat receptor-like kinase (LRR-RLK), Rice blast disease resistance	0.315422	0.454011	1.43938	G	T	30.4183
A2J10_06T0099000.1	receptor-like protein kinase 2 precursor, Putative, expressed	receptor-like protein kinase 2 precursor, Putative, expressed	Leucine rich-repeat receptor-like kinase (LRR-RLK), Rice blast disease resistance	0.315422	0.454011	1.43938	G	C	30.4183
A2J10_02T0221000.2	AAA family ATPase, Putative, expressed	#N/A	#N/A	0.645347	0.928374	1.43857	A	G	167
A2J10_02T0270500.1	nitrilase, Putative, expressed	nitrilase, Putative, expressed	Nitrilase, Regulation of root growth	7.95332	11.4343	1.43768	G	T	30.4183
A2J10_03T0277400.1	histidine acid phosphatase, Putative, expressed	histidine acid phosphatase, Putative, expressed	Histidine acid phosphatase family protein.	0.292767	0.420721	1.43705	A	T	30.4183
A2J10_11T0238700.1	spo0B-associated GTP-binding protein, Putative, expressed	spo0B-associated GTP-binding protein, Putative, expressed	GTP1/OBG subdomain containing protein.	0.147306	0.210773	1.43085	T	G	80
A2J10_11T0238700.1	spo0B-associated GTP-binding protein, Putative, expressed	spo0B-associated GTP-binding protein, Putative, expressed	GTP1/OBG subdomain containing protein.	0.147306	0.210773	1.43085	T	C	37.4152
A2J10_11T0238700.1	spo0B-associated GTP-binding protein, Putative, expressed	spo0B-associated GTP-binding protein, Putative, expressed	GTP1/OBG subdomain containing protein.	0.147306	0.210773	1.43085	T	A	37.4152
A2J10_11T0238700.1	spo0B-associated GTP-binding protein, Putative, expressed	spo0B-associated GTP-binding protein, Putative, expressed	GTP1/OBG subdomain containing protein.	0.147306	0.210773	1.43085	A	G	37.4152
A2J10_01T0424600.1	presenilin, Putative, expressed	presenilin, Putative, expressed	Peptidase A22A, presenilin family protein.	0.307913	0.440174	1.42954	A	T	30.4183
A2J10_06T0151400.2	ABC transporter, ATP-binding protein, Putative, expressed	#N/A	#N/A	5.51532	7.8736	1.42759	G	T	24.4299
A2J10_06T0151400.2	ABC transporter, ATP-binding protein, Putative, expressed	#N/A	#N/A	5.51532	7.8736	1.42759	A	G	21.4455
A2J10_06T0256500.1	OsSPL11 - SBP-box gene family member, expressed	OsSPL11 - SBP-box gene family member, expressed	SBP domain containing protein.	0.410572	0.58345	1.42107	A	G	30.4183
A2J10_04T0117100.2	Putative ubiquitin carboxyl-terminal hydrolase domain containing protein, expressed	#N/A	#N/A	1.03829	1.47351	1.41916	G	T	30.4183
A2J10_03T0170600.1	NB-ARC domain containing protein, expressed	Putative NB-ARC domain containing protein, expressed	Similar to NB-ARC domain containing protein.	0.129858	0.184134	1.41796	G	T	30.4183
A2J10_06T0204800.1	Conserved hypothetical protein	Hypothetical protein	#N/A	0.2874	0.407357	1.41739	T	C	113
A2J10_06T0204800.1	Conserved hypothetical protein	Hypothetical protein	#N/A	0.2874	0.407357	1.41739	A	G	107
A2J10_06T0204800.1	Conserved hypothetical protein	Hypothetical protein	#N/A	0.2874	0.407357	1.41739	C	A	63
A2J10_06T0204800.1	Conserved hypothetical protein	Hypothetical protein	#N/A	0.2874	0.407357	1.41739	A	G	30.4183
A2J10_06T0204800.1	Conserved hypothetical protein	Hypothetical protein	#N/A	0.2874	0.407357	1.41739	T	C	30.4183
A2J10_02T0086500.1	flavonol synthase/flavanone 3-hydroxylase, Putative, expressed	naringenin,2-oxoglutarate 3-dioxygenase, Putative, expressed	2OG-Fe(II) oxygenase domain containing protein.	3.18202	4.50497	1.41576	C	A	30.4183
A2J10_11T0183100.1	mannose-6-phosphate isomerase, Putative, expressed	mannose-6-phosphate isomerase, Putative, expressed	Similar to Mannose-6-phosphate isomerase (ManA).	1.86396	2.62649	1.40909	T	A	30.4183
A2J10_01T0324300.1	stress-induced protein, Putative, expressed	stress-induced protein, Putative, expressed	Hypothetical gene.	0.151824	0.213443	1.40586	C	A	30.4183
A2J10_09T0014900.1	PAP fibrillin family domain containing protein, expressed	PAP fibrillin family domain containing protein, expressed	Fibrillin, Plastoglobule (PG) formation and lipid metabolism in chloroplasts, Heat stress response	55.1938	77.419	1.40268	G	A	30.4183
A2J10_08T0158400.1	SGT1 protein, Putative, expressed	SGT1 protein, Putative, expressed	SGT1 family protein.	0.635893	0.889921	1.39948	T	C	225
A2J10_09T0206100.1	Putative OsWAK90 - OsWAK receptor-like protein kinase, expressed	OsWAK88 - OsWAK pseudogene, expressed	Hypothetical conserved gene.	0.064083	0.089303	1.39355	C	T	97
A2J10_09T0206100.1	Putative OsWAK90 - OsWAK receptor-like protein kinase, expressed	OsWAK88 - OsWAK pseudogene, expressed	Hypothetical conserved gene.	0.064083	0.089303	1.39355	G	T	141
A2J10_09T0206100.1	Putative OsWAK90 - OsWAK receptor-like protein kinase, expressed	OsWAK88 - OsWAK pseudogene, expressed	Hypothetical conserved gene.	0.064083	0.089303	1.39355	T	C	62
A2J10_05T0206100.1	phosphoglycerate kinase protein, Putative, expressed	translation initiation factor eIF3 subunit, Putative, expressed	Translation initiation factor eIF3 subunit domain containing protein.	66.1575	92.0824	1.39186	G	A	21.4455
A2J10_11T0170200.1	amine oxidase, flavin-containing, domain containing protein, expressed	amine oxidase, flavin-containing, domain containing protein, expressed	Carotenoid isomerase, Carotenoid biosynthesis, Root and coleoptile growth	2.84625	3.94625	1.38647	T	C	30.4183
A2J10_01T0412800.1	Hypothetical protein	Conserved hypothetical protein	#N/A	5.71394	7.91468	1.38515	T	C	106
A2J10_09T0191500.1	beta-galactosidase precursor, Putative, expressed	beta-galactosidase precursor, Putative, expressed	Similar to Relative to SR12 protein (Fragment).	0.152407	0.209816	1.37668	C	T	44.4146
A2J10_02T0303600.1	Putative expressed protein	Putative expressed protein	#N/A	0.334196	0.459816	1.37589	A	T	225
A2J10_02T0303600.1	Putative expressed protein	Putative expressed protein	#N/A	0.334196	0.459816	1.37589	T	A	190
A2J10_02T0303600.1	Putative expressed protein	Putative expressed protein	#N/A	0.334196	0.459816	1.37589	A	G	30.4183
A2J10_02T0398700.1	ATMAK10, Putative, expressed	ribosomal protein S15 containing protein, expressed	Similar to 30S ribosomal protein S15.	0.411043	0.564405	1.3731	G	T	30.4183
A2J10_07T0116200.1	ankyrin repeat domain containing protein, expressed	ankyrin repeat domain containing protein, expressed	Similar to predicted protein.	0.951052	1.29611	1.36282	T	C	169
A2J10_04T0089400.1	exo70 exocyst complex subunit domain containing protein, expressed	exo70 exocyst complex subunit domain containing protein, expressed	#N/A	1.20091	1.63639	1.36263	C	T	30.4183
A2J10_04T0089400.1	exo70 exocyst complex subunit domain containing protein, expressed	exo70 exocyst complex subunit domain containing protein, expressed	#N/A	1.20091	1.63639	1.36263	T	C	30.4183
A2J10_07T0146200.1	zinc finger, C3HC4 type domain containing protein, expressed	#N/A	#N/A	0.090904	0.123663	1.36037	T	C	30.4183
A2J10_07T0146200.1	zinc finger, C3HC4 type domain containing protein, expressed	#N/A	#N/A	0.090904	0.123663	1.36037	G	A	30.4183
A2J10_07T0146200.1	zinc finger, C3HC4 type domain containing protein, expressed	#N/A	#N/A	0.090904	0.123663	1.36037	A	G	30.4183
A2J10_11T0187700.1	serine/threonine-protein kinase, Putative, expressed	#N/A	#N/A	0.414013	0.562973	1.3598	C	A	30.4183
A2J10_03T0313600.1	CorA-like magnesium transporter protein, Putative, expressed	#N/A	#N/A	3.20979	4.34601	1.35399	G	A	30.4183
A2J10_01T0269000.1	HD domain containing protein 2, Putative, expressed	HD domain containing protein 2, Putative, expressed	Similar to HD domain containing protein.	1.55795	2.10936	1.35393	A	T	30.4183
A2J10_11T0153700.1	plant protein of unknown function domain containing protein, expressed	#N/A	#N/A	0.003967	0.002345	0.591127	G	A	30.4183
A2J10_04T0258600.2	Putative expressed protein	expressed protein	#N/A	0.458623	0.269437	0.587491	A	T	30.4183
A2J10_06T0160000.1	hydrolase, NUDIX family protein, expressed	#N/A	#N/A	1.24523	0.719227	0.577588	C	T	75
A2J10_02T0190100.1	Putative expressed protein	Putative expressed protein	Conserved hypothetical protein.	0.502316	0.28989	0.577107	C	T	44.4146
A2J10_02T0281700.1	transcription initiation factor, Putative, expressed	transcription initiation factor, Putative, expressed	Transcription initiation factor TFIID component TAF4 domain containing protein.	0.387247	0.222894	0.575586	A	G	30.4183
A2J10_10T0137800.1	receptor kinase like protein, Putative, expressed	receptor kinase like protein, Putative, expressed	Similar to Protein kinase domain containing protein, expressed.	0.464683	0.264952	0.570178	C	T	30.4183
A2J10_08T0177300.1	basic helix-loop-helix, Putative, expressed	basic helix-loop-helix, Putative, expressed	Helix-loop-helix DNA-binding domain containing protein.	0.160224	0.090518	0.564947	C	T	30.4183
A2J10_07T0249300.1	Putative protein kinase domain containing protein, expressed	protein kinase domain containing protein, expressed	Similar to predicted protein.	0.504691	0.284903	0.56451	G	A	30.4183
A2J10_01T0079000.1	TCP family transcription factor, Putative, expressed	TCP family transcription factor, Putative, expressed	Plant-specific transcription factor, miR319 target gene	0.237295	0.132662	0.559059	A	C	37.4152
A2J10_05T0102000.2	Papain family cysteine protease domain containing protein, expressed	#N/A	#N/A	0.628069	0.351078	0.55898	G	A	228
A2J10_03T0232300.1	calcium-transporting ATPase, plasma membrane-type, Putative, expressed	DNA-directed polymerase, Putative, expressed	Similar to DNA polymerase kappa (EC 2.7.7.7) (DINB protein) (DINP). Splice isoform 4.	0.777055	0.433111	0.557375	A	T	30.4183
A2J10_03T0232300.1	calcium-transporting ATPase, plasma membrane-type, Putative, expressed	DNA-directed polymerase, Putative, expressed	Similar to DNA polymerase kappa (EC 2.7.7.7) (DINB protein) (DINP). Splice isoform 4.	0.777055	0.433111	0.557375	C	A	30.4183
A2J10_06T0075000.1	zinc finger, C3HC4 type, domain containing protein, expressed	zinc finger, C3HC4 type, domain containing protein, expressed	Similar to RING-H2 finger protein ATL1Q.	1.89548	1.05188	0.554944	G	T	21.4455
A2J10_01T0348600.1	acetyltransferase, GNAT family, Putative, expressed	acetyltransferase, GNAT family, Putative, expressed	Acyl-CoA N-acyltransferase domain containing protein.	0.136731	0.075581	0.552772	C	A	30.4183
A2J10_03T0088400.1	CDP-alcohol phosphatidyltransferase, Putative, expressed	#N/A	#N/A	8.51209	4.70122	0.552299	A	G	67
A2J10_11T0055700.1	receptor-like protein kinase 5 precursor, Putative, expressed	#N/A	#N/A	0.393613	0.215289	0.546956	T	C	30.4183
A2J10_02T0246000.1	RNA recognition motif containing protein, Putative, expressed	vesicle transport protein GOT1B, Putative, expressed	Got1-like protein family protein.	0.561302	0.306829	0.546638	T	C	30.4183
A2J10_08T0137900.1	Putative YDG/SRA domain containing protein, expressed	YDG/SRA domain containing protein, expressed	Hypothetical conserved gene.	0.064941	0.034815	0.536102	T	C	55
A2J10_07T0259100.1	go35 NBS-LRR, Putative, expressed	#N/A	#N/A	0.028491	0.015083	0.529395	A	G	30.4183
A2J10_07T0259100.1	go35 NBS-LRR, Putative, expressed	#N/A	#N/A	0.028491	0.015083	0.529395	C	T	30.4183
A2J10_09T0062900.1	Putative Cupin domain containing protein, expressed	#N/A	#N/A	0.767515	0.402741	0.524734	C	A	37.4152
A2J10_09T0186700.1	Conserved hypothetical protein	#N/A	#N/A	2.78717	1.42584	0.511572	G	T	228
A2J10_09T0186700.1	Conserved hypothetical protein	#N/A	#N/A	2.78717	1.42584	0.511572	T	C	228
A2J10_09T0186700.1	Conserved hypothetical protein	#N/A	#N/A	2.78717	1.42584	0.511572	C	T	228
A2J10_09T0186700.1	Conserved hypothetical protein	#N/A	#N/A	2.78717	1.42584	0.511572	A	T	228
A2J10_09T0186700.1	Conserved hypothetical protein	#N/A	#N/A	2.78717	1.42584	0.511572	C	T	228
A2J10_09T0186700.1	Conserved hypothetical protein	#N/A	#N/A	2.78717	1.42584	0.511572	A	G	228
A2J10_09T0186700.1	Conserved hypothetical protein	#N/A	#N/A	2.78717	1.42584	0.511572	G	T	228
A2J10_09T0186700.1	Conserved hypothetical protein	#N/A	#N/A	2.78717	1.42584	0.511572	T	C	228
A2J10_09T0186700.1	Conserved hypothetical protein	#N/A	#N/A	2.78717	1.42584	0.511572	G	A	228
A2J10_09T0186700.1	Conserved hypothetical protein	#N/A	#N/A	2.78717	1.42584	0.511572	G	A	199
A2J10_09T0186700.1	Conserved hypothetical protein	#N/A	#N/A	2.78717	1.42584	0.511572	T	C	189
A2J10_09T0186700.1	Conserved hypothetical protein	#N/A	#N/A	2.78717	1.42584	0.511572	A	T	186
A2J10_09T0186700.1	Conserved hypothetical protein	#N/A	#N/A	2.78717	1.42584	0.511572	C	T	145
A2J10_09T0186700.1	Conserved hypothetical protein	#N/A	#N/A	2.78717	1.42584	0.511572	G	T	107
A2J10_09T0186700.1	Conserved hypothetical protein	#N/A	#N/A	2.78717	1.42584	0.511572	G	A	104
A2J10_09T0186700.1	Conserved hypothetical protein	#N/A	#N/A	2.78717	1.42584	0.511572	A	G	21.7649
A2J10_09T0186700.1	Conserved hypothetical protein	#N/A	#N/A	2.78717	1.42584	0.511572	A	C	216
A2J10_09T0186700.1	Conserved hypothetical protein	#N/A	#N/A	2.78717	1.42584	0.511572	C	A	68
A2J10_09T0186700.1	Conserved hypothetical protein	#N/A	#N/A	2.78717	1.42584	0.511572	A	G	68
A2J10_09T0186700.1	Conserved hypothetical protein	#N/A	#N/A	2.78717	1.42584	0.511572	T	C	117
A2J10_09T0186700.1	Conserved hypothetical protein	#N/A	#N/A	2.78717	1.42584	0.511572	C	G	166
A2J10_09T0186700.1	Conserved hypothetical protein	#N/A	#N/A	2.78717	1.42584	0.511572	T	A	80
A2J10_09T0186700.1	Conserved hypothetical protein	#N/A	#N/A	2.78717	1.42584	0.511572	T	C	80
A2J10_09T0186700.1	Conserved hypothetical protein	#N/A	#N/A	2.78717	1.42584	0.511572	T	C	80
A2J10_09T0186700.1	Conserved hypothetical protein	#N/A	#N/A	2.78717	1.42584	0.511572	T	A	80
A2J10_09T0186700.1	Conserved hypothetical protein	#N/A	#N/A	2.78717	1.42584	0.511572	C	G	37.4152
A2J10_09T0186700.1	Conserved hypothetical protein	#N/A	#N/A	2.78717	1.42584	0.511572	A	G	30.4183
A2J10_09T0186700.1	Conserved hypothetical protein	#N/A	#N/A	2.78717	1.42584	0.511572	T	G	30.4183
A2J10_09T0186700.1	Conserved hypothetical protein	#N/A	#N/A	2.78717	1.42584	0.511572	T	A	30.4183
A2J10_09T0186700.1	Conserved hypothetical protein	#N/A	#N/A	2.78717	1.42584	0.511572	C	T	30.4183
A2J10_06T0243300.3	transcription initiation factor TFIID subunit 1, Putative, expressed	#N/A	#N/A	0.686217	0.349513	0.509333	C	G	30.4183
A2J10_07T0185700.2	ABC1 family domain containing protein, Putative, expressed	#N/A	#N/A	0.36219	0.18279	0.50468	A	G	30.4183
A2J10_07T0185700.2	ABC1 family domain containing protein, Putative, expressed	#N/A	#N/A	0.36219	0.18279	0.50468	T	C	30.4183
A2J10_01T0179900.1	Conserved hypothetical protein	#N/A	#N/A	0.12568	0.063422	0.504631	C	A	30.4183
A2J10_03T0183500.1	transport protein particle component, Bet3, domain containing protein, expressed	#N/A	Hypothetical gene.	1.45827	0.732243	0.50213	T	C	38.9327
A2J10_06T0187000.1	RNA recognition motif containing protein, Putative, expressed	#N/A	#N/A	0.057619	0.028907	0.501692	C	T	30.4183
A2J10_01T0301900.1	Conserved hypothetical protein	#N/A	#N/A	0.431836	0.215854	0.499852	C	A	30.4183
A2J10_01T0114500.1	RNA binding protein, Putative, expressed	#N/A	#N/A	4.68961	2.32163	0.495058	G	A	30.4183
A2J10_05T0031400.1	3-hydroxyacyl-CoA dehydrogenase, Putative, expressed	3-hydroxyacyl-CoA dehydrogenase, Putative, expressed	Similar to Protein MFP-b.	0.023215	0.011375	0.489985	T	C	84
A2J10_05T0031400.1	3-hydroxyacyl-CoA dehydrogenase, Putative, expressed	3-hydroxyacyl-CoA dehydrogenase, Putative, expressed	Similar to Protein MFP-b.	0.023215	0.011375	0.489985	T	G	67
A2J10_11T0130900.1	Putative NB-ARC domain containing protein, expressed	#N/A	#N/A	0.296891	0.144618	0.487108	T	G	117
A2J10_11T0130900.1	Putative NB-ARC domain containing protein, expressed	#N/A	#N/A	0.296891	0.144618	0.487108	T	C	89
A2J10_11T0130900.1	Putative NB-ARC domain containing protein, expressed	#N/A	#N/A	0.296891	0.144618	0.487108	A	G	92
A2J10_11T0130900.1	Putative NB-ARC domain containing protein, expressed	#N/A	#N/A	0.296891	0.144618	0.487108	T	C	30.4183
A2J10_12T0044500.1	Putative expressed protein	#N/A	#N/A	4.22222	2.01914	0.478217	G	C	215
A2J10_12T0044500.1	Putative expressed protein	#N/A	#N/A	4.22222	2.01914	0.478217	T	C	116
A2J10_03T0217300.1	Putative modifier of rudimentary protein, expressed	expressed protein	Conserved hypothetical protein.	0.599908	0.286533	0.477628	C	A	30.4183
A2J10_04T0188700.1	histone acetyltransferase GCN5, Putative, expressed	histone acetyltransferase GCN5, Putative, expressed	Similar to General control of amino-acid synthesis 5-like 2 (Fragment).	0.29846	0.142426	0.477203	T	C	30.4183
A2J10_10T0124200.1	expressed protein	expressed protein	Conserved hypothetical protein.	0.696575	0.33171	0.476201	A	G	30.4183
A2J10_06T0293200.1	OsFBX207 - F-box domain containing protein, expressed	#N/A	#N/A	0.204268	0.09632	0.471537	A	T	30.4183
A2J10_10T0189700.6	mitochondrial carrier protein, Putative, expressed	mitochondrial carrier protein, Putative, expressed	Similar to Mitochondrial carnitine/acylcarnitine carrier-like protein (A BOUT DE SOUFFLE) (Carnitine/acylcarnitine translocase-like protein) (CAC-like protein).	12.1809	5.73503	0.47082	A	T	30.4183
A2J10_12T0035000.1	photosystem II P680 chlorophyll A apoprotein, Putative, expressed	#N/A	#N/A	17.716	8.33947	0.47073	A	T	20.0698
A2J10_12T0035000.1	photosystem II P680 chlorophyll A apoprotein, Putative, expressed	#N/A	#N/A	17.716	8.33947	0.47073	A	T	225
A2J10_12T0035000.1	photosystem II P680 chlorophyll A apoprotein, Putative, expressed	#N/A	#N/A	17.716	8.33947	0.47073	A	G	37.4152
A2J10_12T0035000.1	photosystem II P680 chlorophyll A apoprotein, Putative, expressed	#N/A	#N/A	17.716	8.33947	0.47073	G	C	21.4455
A2J10_02T0127200.1	BRASSINOSTEROID INSENSITIVE 1-associated receptor kinase 1 precursor, Putative, expressed	BRASSINOSTEROID INSENSITIVE 1-associated receptor kinase 1 precursor, Putative, expressed	Leucine-rich repeat receptor-like kinase, Maintenance of the tapetal cell layer and microspore/pollen viability, Control of male fertility, Regulation of plant growth through the brassinosteroid (BR) signaling pathway	0.06847	0.031615	0.461735	C	T	30.4183
A2J10_02T0330700.3	PHD-finger family protein, expressed	#N/A	#N/A	0.944484	0.435172	0.460751	C	T	30.4183
A2J10_07T0125800.1	growth regulating factor protein, Putative, expressed	#N/A	#N/A	0.193452	0.087907	0.454412	C	A	30.4183
A2J10_05T0221600.2	NADH-ubiquinone oxidoreductase chain 4, Putative, expressed	#N/A	#N/A	59.3175	26.9303	0.454002	G	A	228
A2J10_05T0221600.2	NADH-ubiquinone oxidoreductase chain 4, Putative, expressed	#N/A	#N/A	59.3175	26.9303	0.454002	G	A	228
A2J10_05T0221600.2	NADH-ubiquinone oxidoreductase chain 4, Putative, expressed	#N/A	#N/A	59.3175	26.9303	0.454002	G	A	228
A2J10_05T0221600.2	NADH-ubiquinone oxidoreductase chain 4, Putative, expressed	#N/A	#N/A	59.3175	26.9303	0.454002	G	A	228
A2J10_05T0221600.2	NADH-ubiquinone oxidoreductase chain 4, Putative, expressed	#N/A	#N/A	59.3175	26.9303	0.454002	G	A	170
A2J10_05T0221600.2	NADH-ubiquinone oxidoreductase chain 4, Putative, expressed	#N/A	#N/A	59.3175	26.9303	0.454002	G	A	142
A2J10_05T0221600.2	NADH-ubiquinone oxidoreductase chain 4, Putative, expressed	#N/A	#N/A	59.3175	26.9303	0.454002	G	A	129
A2J10_05T0221600.2	NADH-ubiquinone oxidoreductase chain 4, Putative, expressed	#N/A	#N/A	59.3175	26.9303	0.454002	A	G	225
A2J10_05T0221600.2	NADH-ubiquinone oxidoreductase chain 4, Putative, expressed	#N/A	#N/A	59.3175	26.9303	0.454002	T	C	225
A2J10_05T0221600.2	NADH-ubiquinone oxidoreductase chain 4, Putative, expressed	#N/A	#N/A	59.3175	26.9303	0.454002	A	G	225
A2J10_05T0221600.2	NADH-ubiquinone oxidoreductase chain 4, Putative, expressed	#N/A	#N/A	59.3175	26.9303	0.454002	A	G	225
A2J10_05T0221600.2	NADH-ubiquinone oxidoreductase chain 4, Putative, expressed	#N/A	#N/A	59.3175	26.9303	0.454002	G	A	225
A2J10_05T0221600.2	NADH-ubiquinone oxidoreductase chain 4, Putative, expressed	#N/A	#N/A	59.3175	26.9303	0.454002	T	C	225
A2J10_05T0221600.2	NADH-ubiquinone oxidoreductase chain 4, Putative, expressed	#N/A	#N/A	59.3175	26.9303	0.454002	A	G	225
A2J10_05T0221600.2	NADH-ubiquinone oxidoreductase chain 4, Putative, expressed	#N/A	#N/A	59.3175	26.9303	0.454002	T	C	225
A2J10_05T0221600.2	NADH-ubiquinone oxidoreductase chain 4, Putative, expressed	#N/A	#N/A	59.3175	26.9303	0.454002	A	T	225
A2J10_05T0221600.2	NADH-ubiquinone oxidoreductase chain 4, Putative, expressed	#N/A	#N/A	59.3175	26.9303	0.454002	T	C	225
A2J10_05T0221600.2	NADH-ubiquinone oxidoreductase chain 4, Putative, expressed	#N/A	#N/A	59.3175	26.9303	0.454002	A	G	225
A2J10_05T0221600.2	NADH-ubiquinone oxidoreductase chain 4, Putative, expressed	#N/A	#N/A	59.3175	26.9303	0.454002	T	C	225
A2J10_05T0221600.2	NADH-ubiquinone oxidoreductase chain 4, Putative, expressed	#N/A	#N/A	59.3175	26.9303	0.454002	A	G	225
A2J10_05T0221600.2	NADH-ubiquinone oxidoreductase chain 4, Putative, expressed	#N/A	#N/A	59.3175	26.9303	0.454002	T	G	225
A2J10_05T0221600.2	NADH-ubiquinone oxidoreductase chain 4, Putative, expressed	#N/A	#N/A	59.3175	26.9303	0.454002	T	C	225
A2J10_05T0221600.2	NADH-ubiquinone oxidoreductase chain 4, Putative, expressed	#N/A	#N/A	59.3175	26.9303	0.454002	T	G	225
A2J10_05T0221600.2	NADH-ubiquinone oxidoreductase chain 4, Putative, expressed	#N/A	#N/A	59.3175	26.9303	0.454002	T	A	225
A2J10_05T0221600.2	NADH-ubiquinone oxidoreductase chain 4, Putative, expressed	#N/A	#N/A	59.3175	26.9303	0.454002	T	C	215
A2J10_05T0221600.2	NADH-ubiquinone oxidoreductase chain 4, Putative, expressed	#N/A	#N/A	59.3175	26.9303	0.454002	A	G	202
A2J10_05T0221600.2	NADH-ubiquinone oxidoreductase chain 4, Putative, expressed	#N/A	#N/A	59.3175	26.9303	0.454002	C	G	197
A2J10_05T0221600.2	NADH-ubiquinone oxidoreductase chain 4, Putative, expressed	#N/A	#N/A	59.3175	26.9303	0.454002	T	C	196
A2J10_05T0221600.2	NADH-ubiquinone oxidoreductase chain 4, Putative, expressed	#N/A	#N/A	59.3175	26.9303	0.454002	T	G	217
A2J10_05T0221600.2	NADH-ubiquinone oxidoreductase chain 4, Putative, expressed	#N/A	#N/A	59.3175	26.9303	0.454002	T	C	211
A2J10_05T0221600.2	NADH-ubiquinone oxidoreductase chain 4, Putative, expressed	#N/A	#N/A	59.3175	26.9303	0.454002	G	T	193
A2J10_05T0221600.2	NADH-ubiquinone oxidoreductase chain 4, Putative, expressed	#N/A	#N/A	59.3175	26.9303	0.454002	T	C	183
A2J10_05T0221600.2	NADH-ubiquinone oxidoreductase chain 4, Putative, expressed	#N/A	#N/A	59.3175	26.9303	0.454002	T	A	155
A2J10_05T0221600.2	NADH-ubiquinone oxidoreductase chain 4, Putative, expressed	#N/A	#N/A	59.3175	26.9303	0.454002	T	A	141
A2J10_05T0221600.2	NADH-ubiquinone oxidoreductase chain 4, Putative, expressed	#N/A	#N/A	59.3175	26.9303	0.454002	T	A	131
A2J10_05T0221600.2	NADH-ubiquinone oxidoreductase chain 4, Putative, expressed	#N/A	#N/A	59.3175	26.9303	0.454002	T	C	113
A2J10_05T0221600.2	NADH-ubiquinone oxidoreductase chain 4, Putative, expressed	#N/A	#N/A	59.3175	26.9303	0.454002	A	G	111
A2J10_05T0221600.2	NADH-ubiquinone oxidoreductase chain 4, Putative, expressed	#N/A	#N/A	59.3175	26.9303	0.454002	G	C	62
A2J10_05T0221600.2	NADH-ubiquinone oxidoreductase chain 4, Putative, expressed	#N/A	#N/A	59.3175	26.9303	0.454002	C	T	59
A2J10_09T0036100.1	cytochrome P450, Putative, expressed	cytochrome P450, Putative, expressed	Similar to flavonoid 3-monooxygenase.	1.17406	0.53075	0.452063	C	A	168
A2J10_09T0036100.1	cytochrome P450, Putative, expressed	cytochrome P450, Putative, expressed	Similar to flavonoid 3-monooxygenase.	1.17406	0.53075	0.452063	G	A	80
A2J10_09T0036100.1	cytochrome P450, Putative, expressed	cytochrome P450, Putative, expressed	Similar to flavonoid 3-monooxygenase.	1.17406	0.53075	0.452063	T	C	80
A2J10_09T0036100.1	cytochrome P450, Putative, expressed	cytochrome P450, Putative, expressed	Similar to flavonoid 3-monooxygenase.	1.17406	0.53075	0.452063	C	T	80
A2J10_09T0036100.1	cytochrome P450, Putative, expressed	cytochrome P450, Putative, expressed	Similar to flavonoid 3-monooxygenase.	1.17406	0.53075	0.452063	G	T	62
A2J10_09T0036100.1	cytochrome P450, Putative, expressed	cytochrome P450, Putative, expressed	Similar to flavonoid 3-monooxygenase.	1.17406	0.53075	0.452063	G	T	62
A2J10_09T0036100.1	cytochrome P450, Putative, expressed	cytochrome P450, Putative, expressed	Similar to flavonoid 3-monooxygenase.	1.17406	0.53075	0.452063	G	A	62
A2J10_09T0036100.1	cytochrome P450, Putative, expressed	cytochrome P450, Putative, expressed	Similar to flavonoid 3-monooxygenase.	1.17406	0.53075	0.452063	G	T	62
A2J10_09T0036100.1	cytochrome P450, Putative, expressed	cytochrome P450, Putative, expressed	Similar to flavonoid 3-monooxygenase.	1.17406	0.53075	0.452063	A	C	57
A2J10_09T0036100.1	cytochrome P450, Putative, expressed	cytochrome P450, Putative, expressed	Similar to flavonoid 3-monooxygenase.	1.17406	0.53075	0.452063	T	C	52
A2J10_09T0036100.1	cytochrome P450, Putative, expressed	cytochrome P450, Putative, expressed	Similar to flavonoid 3-monooxygenase.	1.17406	0.53075	0.452063	C	G	51
A2J10_09T0036100.1	cytochrome P450, Putative, expressed	cytochrome P450, Putative, expressed	Similar to flavonoid 3-monooxygenase.	1.17406	0.53075	0.452063	T	G	29.4193
A2J10_11T0203600.1	EARLY flowering protein, Putative, expressed	#N/A	#N/A	0.076843	0.034285	0.446169	G	C	30.4183
A2J10_06T0158700.1	Conserved hypothetical protein	#N/A	#N/A	0.40195	0.178908	0.4451	G	A	30.4183
A2J10_12T0059700.1	SET domain-containing protein, Putative, expressed	SET domain-containing protein, Putative, expressed	SET domain containing protein.	0.644526	0.286849	0.445054	G	A	30.4183
A2J10_12T0079000.1	photosynthetic reaction center protein, Putative, expressed	#N/A	#N/A	4326.28	1919.38	0.443656	A	G	228
A2J10_12T0079000.1	photosynthetic reaction center protein, Putative, expressed	#N/A	#N/A	4326.28	1919.38	0.443656	T	C	228
A2J10_12T0079000.1	photosynthetic reaction center protein, Putative, expressed	#N/A	#N/A	4326.28	1919.38	0.443656	A	G	215
A2J10_12T0079000.1	photosynthetic reaction center protein, Putative, expressed	#N/A	#N/A	4326.28	1919.38	0.443656	T	C	186
A2J10_12T0079000.1	photosynthetic reaction center protein, Putative, expressed	#N/A	#N/A	4326.28	1919.38	0.443656	A	G	144
A2J10_12T0079000.1	photosynthetic reaction center protein, Putative, expressed	#N/A	#N/A	4326.28	1919.38	0.443656	A	G	83
A2J10_12T0079000.1	photosynthetic reaction center protein, Putative, expressed	#N/A	#N/A	4326.28	1919.38	0.443656	A	C	82
A2J10_12T0079000.1	photosynthetic reaction center protein, Putative, expressed	#N/A	#N/A	4326.28	1919.38	0.443656	T	C	228
A2J10_12T0079000.1	photosynthetic reaction center protein, Putative, expressed	#N/A	#N/A	4326.28	1919.38	0.443656	T	A	46.4146
A2J10_12T0079000.1	photosynthetic reaction center protein, Putative, expressed	#N/A	#N/A	4326.28	1919.38	0.443656	G	C	34.4159
A2J10_12T0079000.1	photosynthetic reaction center protein, Putative, expressed	#N/A	#N/A	4326.28	1919.38	0.443656	T	C	30.4183
A2J10_02T0420000.1	beta-catenin-like protein 1, Putative, expressed	beta-catenin-like protein 1, Putative, expressed	Armadillo-type fold domain containing protein.	0.583352	0.254345	0.436006	G	A	30.4183
A2J10_02T0420000.1	beta-catenin-like protein 1, Putative, expressed	beta-catenin-like protein 1, Putative, expressed	Armadillo-type fold domain containing protein.	0.583352	0.254345	0.436006	G	A	21.4455
A2J10_09T0178400.1	Putative expressed protein	#N/A	Hypothetical protein.	2.22093	0.961102	0.432747	C	T	21.4455
A2J10_04T0210400.1	Conserved hypothetical protein	#N/A	#N/A	0.538463	0.232529	0.431838	A	C	30.4183
A2J10_01T0380000.1	Putative OsFBX27 - F-box domain containing protein, expressed	#N/A	#N/A	0.02306	0.009473	0.410798	C	G	34.4159
A2J10_05T0032600.1	tubulin/FtsZ domain containing protein, Putative, expressed	tubulin/FtsZ domain containing protein, Putative, expressed	Similar to Tubulin gamma-1 chain (Gamma-1 tubulin).	1.72048	0.703493	0.408894	C	A	30.4183
A2J10_12T0152100.3	expressed protein	expressed protein	Domain of unknown function DUF304l domain containing protein.	0.357958	0.143093	0.399748	G	T	29.4193
A2J10_01T0349100.1	copper-transporting ATPase PAA1, Putative, expressed	#N/A	#N/A	0.103703	0.040169	0.387347	G	T	30.4183
A2J10_08T0106900.1	bifunctional aspartokinase/homoserine dehydrogenase, chloroplast precursor, Putative, expressed	bifunctional aspartokinase/homoserine dehydrogenase, chloroplast precursor, Putative, expressed	Similar to aspartate kinase-homoserine dehydrogenase.	0.578703	0.221679	0.383062	G	T	30.4183
A2J10_08T0061200.1	metal cation transporter, Putative, expressed	metal cation transporter, Putative, expressed	Hypothetical gene.	0.766605	0.289783	0.378008	G	A	30.4183
A2J10_08T0005600.1	adenylate kinase, Putative, expressed	adenylate kinase, Putative, expressed	Homolog of Arabidopsis ADENOSINE MONOPHOSPHATE KINASE 2 (AMK2), A member of adenylate kinase (AK) family	35.2016	13.1796	0.374405	G	A	30.4183
A2J10_08T0005600.1	adenylate kinase, Putative, expressed	adenylate kinase, Putative, expressed	Homolog of Arabidopsis ADENOSINE MONOPHOSPHATE KINASE 2 (AMK2), A member of adenylate kinase (AK) family	35.2016	13.1796	0.374405	G	T	30.4183
A2J10_01T0396000.1	polyprenyl synthetase, Putative, expressed	#N/A	#N/A	0.471572	0.175546	0.372257	T	C	30.4183
A2J10_11T0104300.1	Conserved hypothetical protein	#N/A	#N/A	0.360785	0.132231	0.366509	C	A	22.6563
A2J10_08T0092000.1	Conserved hypothetical protein	#N/A	#N/A	0.487664	0.168825	0.346191	A	G	198
A2J10_04T0271300.1	ATMAP70 protein, Putative, expressed	#N/A	#N/A	0.344682	0.11833	0.343302	C	A	45.8804
A2J10_09T0035400.2	cytochrome c oxidase subunit 1, Putative, expressed	#N/A	#N/A	103.942	35.5763	0.342272	T	C	225
A2J10_09T0035400.2	cytochrome c oxidase subunit 1, Putative, expressed	#N/A	#N/A	103.942	35.5763	0.342272	A	C	225
A2J10_09T0035400.2	cytochrome c oxidase subunit 1, Putative, expressed	#N/A	#N/A	103.942	35.5763	0.342272	A	C	225
A2J10_08T0009100.1	RNA recognition motif containing protein, Putative, expressed	#N/A	#N/A	0.197775	0.067514	0.341368	G	T	80
A2J10_06T0100800.1	expressed protein	#N/A	#N/A	82.1596	28.019	0.341031	G	A	185
A2J10_06T0100800.1	expressed protein	#N/A	#N/A	82.1596	28.019	0.341031	T	C	166
A2J10_06T0100800.1	expressed protein	#N/A	#N/A	82.1596	28.019	0.341031	C	A	225
A2J10_06T0100800.1	expressed protein	#N/A	#N/A	82.1596	28.019	0.341031	T	C	77
A2J10_03T0307700.1	homeobox domain containing protein, expressed	#N/A	#N/A	0.522421	0.178073	0.340861	T	C	30.4183
A2J10_02T0073200.1	DEAD-box ATP-dependent RNA helicase 41, Putative, expressed	AP2 domain containing protein, expressed	DNA/RNA helicase, C-terminal domain containing protein.	1.54791	0.519246	0.33545	G	A	21.4455
A2J10_06T0051000.2	SAC domain containing protein, Putative, expressed	#N/A	#N/A	0.293102	0.097998	0.334348	A	G	30.4183
A2J10_06T0051000.2	SAC domain containing protein, Putative, expressed	#N/A	#N/A	0.293102	0.097998	0.334348	G	T	30.4183
A2J10_03T0044600.1	MATE efflux family protein, Putative, expressed	MATE efflux family protein, Putative, expressed	Similar to transparent testa 12 protein.	4.80852	1.5678	0.326046	G	T	30.4183
A2J10_05T0254800.1	zinc finger, C3HC4 type domain containing protein, expressed	#N/A	#N/A	0.443756	0.142815	0.321832	T	C	30.4183
A2J10_07T0177200.1	OsFBX238 - F-box domain containing protein, expressed	#N/A	#N/A	0.246845	0.07632	0.309182	G	T	30.4183
A2J10_01T0310600.1	alliin lyase precursor, Putative, expressed	#N/A	#N/A	0.65513	0.195528	0.298457	C	T	30.4183
A2J10_06T0218000.6	expressed protein	expressed protein	Surface protein from Gram-positive cocci, anchor region domain containing protein.	0.207493	0.060887	0.293441	C	T	225
A2J10_06T0243400.1	methyltransferase domain containing protein, Putative, expressed	#N/A	#N/A	0.163523	0.047551	0.290791	G	A	62
A2J10_07T0103400.1	CAMK_CAMK_like.32 - CAMK includes calcium/calmodulin depedent protein kinases, expressed	CAMK_CAMK_like.32 - CAMK includes calcium/calmodulin depedent protein kinases, expressed	Plasma membrane-associated calcium-dependent protein kinase, Direct phosphorylation and activation of MAPK, Negative reguration of rice immunity	0.912357	0.26373	0.289064	T	A	30.4183
A2J10_08T0021900.2	fringe-related protein, Putative, expressed	fringe-related protein, Putative, expressed	Protein of unknown function DUF604 family protein.	0.105662	0.030131	0.285164	C	T	30.4183
A2J10_08T0206100.1	pentatricopeptide repeat protein, Putative, expressed	RNA recognition motif containing protein, Putative, expressed	Similar to Oligouridylate binding protein.	0.013142	0.00374	0.284584	T	A	30.4183
A2J10_04T0314000.1	expressed protein	expressed protein	#N/A	1.41722	0.399407	0.281823	C	A	30.4183
A2J10_05T0128700.1	inositol-3-phosphate synthase, Putative, expressed	inositol-3-phosphate synthase, Putative, expressed	Myo-inositol 3-phosphate synthase 1, Phytic acid biosynthesis, Determination of phytic acid accumulation in grain	0.071316	0.020094	0.28176	T	C	30.4183
A2J10_09T0129600.1	Conserved hypothetical protein	CAAX amino terminal protease family protein, Putative, expressed	CAAX amino terminal protease domain containing protein.	0.028198	0.007916	0.280729	G	T	30.4183
A2J10_09T0129600.1	Conserved hypothetical protein	CAAX amino terminal protease family protein, Putative, expressed	CAAX amino terminal protease domain containing protein.	0.028198	0.007916	0.280729	C	T	30.4183
A2J10_02T0015300.1	pentatricopeptide, Putative, expressed	#N/A	#N/A	0.072511	0.019756	0.272455	C	A	30.4183
A2J10_06T0096500.1	Doubtful hypothetical protein	#N/A	#N/A	0.164724	0.042698	0.259209	A	T	30.4183
A2J10_06T0096500.1	Doubtful hypothetical protein	#N/A	#N/A	0.164724	0.042698	0.259209	A	G	30.4183
A2J10_12T0004800.1	expressed protein	#N/A	#N/A	2.46539	0.636744	0.258274	C	T	72
A2J10_01T0163900.1	powdery mildew resistance protein PM3F, Putative, expressed	expressed protein	#N/A	0.28829	0.072608	0.251858	A	T	30.4183
A2J10_12T0032900.2	expressed protein	#N/A	#N/A	0.53561	0.132834	0.248005	G	T	30.4183
A2J10_01T0440800.1	receptor-like protein kinase HAIKU2 precursor, Putative, expressed	Conserved hypothetical protein	Protein kinase, core domain containing protein.	2.96507	0.652205	0.219963	C	T	30.4183
A2J10_02T0022600.1	hsp20/alpha crystallin family protein, Putative, expressed	hsp20/alpha crystallin family protein, Putative, expressed	Similar to Cytosolic class I small heat shock protein 6 (Fragment).	0.106564	0.023234	0.218029	A	T	30.4183
A2J10_01T0267000.1	NADPH-dependent oxidoreductase, Putative, expressed	#N/A	#N/A	0.013009	0.002795	0.214851	C	T	102
A2J10_01T0267000.1	NADPH-dependent oxidoreductase, Putative, expressed	#N/A	#N/A	0.013009	0.002795	0.214851	C	T	78
A2J10_01T0267000.1	NADPH-dependent oxidoreductase, Putative, expressed	#N/A	#N/A	0.013009	0.002795	0.214851	C	T	42.4057
A2J10_01T0267000.1	NADPH-dependent oxidoreductase, Putative, expressed	#N/A	#N/A	0.013009	0.002795	0.214851	C	T	97
A2J10_01T0089700.1	thioesterase family protein, Putative, expressed	thioesterase family protein, Putative, expressed	#N/A	0.448304	0.095631	0.213317	C	T	30.4183
A2J10_07T0128400.1	la domain containing protein, Putative, expressed	#N/A	#N/A	0.572757	0.122022	0.213043	C	T	21.4455
A2J10_02T0216700.1	STE_MEKK_ste11_MAP3K.9 - STE kinases include homologs to sterile 7, sterile 11 and sterile 20 from yeast,expressed	#N/A	Hypothetical gene.	2.93265	0.622232	0.212174	C	T	190
A2J10_02T0216700.1	STE_MEKK_ste11_MAP3K.9 - STE kinases include homologs to sterile 7, sterile 11 and sterile 20 from yeast,expressed	#N/A	Hypothetical gene.	2.93265	0.622232	0.212174	A	G	172
A2J10_02T0016600.1	expressed protein	expressed protein	Hypothetical conserved gene.	0.037966	0.007561	0.199152	G	T	21.4455
A2J10_04T0215600.1	DUF581 domain containing protein, expressed	DUF581 domain containing protein, expressed	Protein of unknown function DUF581 family protein.	0.886274	0.174571	0.196972	C	A	21.4455
A2J10_02T0200600.2	Plant PDR ABC transporter associated domain containing protein, expressed	#N/A	#N/A	1.25021	0.243076	0.194428	C	T	228
A2J10_02T0200600.2	Plant PDR ABC transporter associated domain containing protein, expressed	#N/A	#N/A	1.25021	0.243076	0.194428	A	G	225
A2J10_02T0200600.2	Plant PDR ABC transporter associated domain containing protein, expressed	#N/A	#N/A	1.25021	0.243076	0.194428	T	G	225
A2J10_02T0200600.2	Plant PDR ABC transporter associated domain containing protein, expressed	#N/A	#N/A	1.25021	0.243076	0.194428	A	C	225
A2J10_02T0200600.2	Plant PDR ABC transporter associated domain containing protein, expressed	#N/A	#N/A	1.25021	0.243076	0.194428	C	T	136
A2J10_02T0200600.2	Plant PDR ABC transporter associated domain containing protein, expressed	#N/A	#N/A	1.25021	0.243076	0.194428	C	G	112
A2J10_02T0200600.2	Plant PDR ABC transporter associated domain containing protein, expressed	#N/A	#N/A	1.25021	0.243076	0.194428	G	C	104
A2J10_02T0200600.2	Plant PDR ABC transporter associated domain containing protein, expressed	#N/A	#N/A	1.25021	0.243076	0.194428	A	G	30.4183
A2J10_12T0183300.1	deoxyhypusine hydroxylase, Putative, expressed	#N/A	#N/A	0.754001	0.145879	0.193473	C	G	162
A2J10_12T0183300.1	deoxyhypusine hydroxylase, Putative, expressed	#N/A	#N/A	0.754001	0.145879	0.193473	T	G	158
A2J10_02T0339600.2	ADP-ribosylation factor, Putative, expressed	#N/A	#N/A	0.541877	0.104333	0.19254	T	A	30.4183
A2J10_02T0419000.1	expressed protein	#N/A	#N/A	0.000513	9.3e-05	0.181287	C	T	30.4183
A2J10_05T0035800.1	TKL_IRAK_CrRLK1L-1.10 - The CrRLK1L-1 subfamily has homology to the CrRLK1L homolog, expressed	#N/A	#N/A	0.166175	0.029695	0.178697	T	C	30.4183
A2J10_01T0151100.1	WD domain containing protein, Putative, expressed	WD domain containing protein, Putative, expressed	Hypothetical conserved gene.	0.626823	0.108971	0.173847	C	T	155
A2J10_01T0151100.1	WD domain containing protein, Putative, expressed	WD domain containing protein, Putative, expressed	Hypothetical conserved gene.	0.626823	0.108971	0.173847	T	C	149
A2J10_01T0151100.1	WD domain containing protein, Putative, expressed	WD domain containing protein, Putative, expressed	Hypothetical conserved gene.	0.626823	0.108971	0.173847	G	C	30.4183
A2J10_05T0024100.1	helicase, Putative, expressed	#N/A	#N/A	0.212122	0.03674	0.173202	A	C	60
A2J10_09T0016300.1	tyrosine phosphatase family protein, Putative, expressed	tyrosine phosphatase family protein, Putative, expressed	Protein tyrosine phosphatase, Negative regulation of drought stress response	0.184393	0.031261	0.169535	T	C	30.4183
A2J10_08T0020100.1	Conserved hypothetical protein	#N/A	#N/A	0.114453	0.017821	0.155706	G	A	147
A2J10_08T0020100.1	Conserved hypothetical protein	#N/A	#N/A	0.114453	0.017821	0.155706	T	C	21.4455
A2J10_06T0114200.1	Conserved hypothetical protein	#N/A	#N/A	0.079116	0.011823	0.149439	G	A	30.4183
A2J10_06T0114200.1	Conserved hypothetical protein	#N/A	#N/A	0.079116	0.011823	0.149439	T	G	30.4183
A2J10_03T0263700.1	metal cation transporter, Putative, expressed	metal cation transporter, Putative, expressed	Fe<sup>2+</sup> transporter	1.239	0.184104	0.14859	T	C	30.4183
A2J10_03T0005600.1	exostosin family domain containing protein, expressed	#N/A	#N/A	0.461624	0.064491	0.139705	G	A	67
A2J10_07T0233600.1	Hypothetical protein	#N/A	#N/A	0.947684	0.130431	0.137631	G	T	30.4183
A2J10_02T0147400.1	sodium/calcium exchanger protein, Putative, expressed	sodium/calcium exchanger protein, Putative, expressed	Sodium/calcium exchanger membrane region domain containing protein.	3.06083	0.42073	0.137456	T	C	154
A2J10_02T0257500.1	receptor kinase, Putative, expressed	#N/A	#N/A	0.213937	0.027224	0.127252	G	T	22.6563
A2J10_08T0225000.2	kinesin motor domain containing protein, expressed	#N/A	#N/A	1.19691	0.13828	0.115531	T	C	30.4183
A2J10_03T0025600.1	AMP-binding domain containing protein, expressed	#N/A	Conserved hypothetical protein.	3.76484	0.398565	0.105865	G	T	21.4455
A2J10_03T0364700.1	PHD finger protein, Putative, expressed	PHD finger protein, Putative, expressed	Zinc finger, RING/FYVE/PHD-type domain containing protein.	0.004442	0.000452	0.101756	T	C	30.4183
A2J10_09T0007000.1	kinesin motor domain containing protein, Putative, expressed	#N/A	#N/A	0.016865	0.001699	0.100741	T	C	30.4183
A2J10_01T0347100.3	Putative expressed protein	#N/A	#N/A	0.300917	0.028749	0.095538	T	A	30.4183
A2J10_02T0376100.1	expressed protein	expressed protein	Protein of unknown function DUF1740 domain containing protein.	1.01299	0.092095	0.0909144	T	C	21.4455
A2J10_09T0186700.5	Putative deoxyribodipyrimidine photolyase family protein, expressed	#N/A	#N/A	0.739677	0.066686	0.0901556	T	A	30.4183
A2J10_09T0186700.5	Putative deoxyribodipyrimidine photolyase family protein, expressed	#N/A	#N/A	0.739677	0.066686	0.0901556	G	A	30.4183
A2J10_12T0175700.1	galactosyltransferase family protein, Putative, expressed	#N/A	#N/A	0.15197	0.01339	0.0881095	G	T	21.4455
A2J10_02T0008100.1	SNF2 family N-terminal domain containing protein, expressed	protein kinase, Putative, expressed	Similar to protein kinase.	0.382943	0.030717	0.080213	T	C	30.4183
A2J10_04T0282900.1	dihydroorotate dihydrogenase protein, Putative, expressed	dihydroorotate dihydrogenase protein, Putative, expressed	Similar to H0101F08.3 protein.	0.376381	0.027374	0.0727295	T	C	30.4183
A2J10_12T0078200.1	DNA polymerase I family protein, expressed	DNA polymerase I family protein, expressed	Similar to DNA-directed DNA polymerase family protein.	0.5384	0.037272	0.0692273	T	A	30.4183
A2J10_11T0046900.3	Putative expressed protein	#N/A	#N/A	0.278323	0.01654	0.0594274	T	C	30.4183
A2J10_11T0155300.1	exportin 1, Putative, expressed	exportin 1, Putative, expressed	#N/A	2.30539	0.131585	0.0570771	A	G	30.4183
A2J10_11T0155300.1	exportin 1, Putative, expressed	exportin 1, Putative, expressed	#N/A	2.30539	0.131585	0.0570771	C	G	30.4183
A2J10_08T0150000.1	Putative expressed protein	#N/A	#N/A	3.72896	0.189629	0.0508531	G	A	108
A2J10_08T0150000.1	Putative expressed protein	#N/A	#N/A	3.72896	0.189629	0.0508531	A	G	225
A2J10_08T0150000.1	Putative expressed protein	#N/A	#N/A	3.72896	0.189629	0.0508531	A	G	225
A2J10_08T0150000.1	Putative expressed protein	#N/A	#N/A	3.72896	0.189629	0.0508531	T	C	225
A2J10_08T0150000.1	Putative expressed protein	#N/A	#N/A	3.72896	0.189629	0.0508531	A	G	225
A2J10_08T0150000.1	Putative expressed protein	#N/A	#N/A	3.72896	0.189629	0.0508531	T	C	225
A2J10_08T0150000.1	Putative expressed protein	#N/A	#N/A	3.72896	0.189629	0.0508531	A	C	30.4183
A2J10_07T0236900.1	strictosidine synthase, Putative, expressed	#N/A	#N/A	2.34708	0.109708	0.0467423	T	C	30.4183
A2J10_07T0089500.1	Putative AMP-binding domain containing protein, expressed	#N/A	#N/A	0.358331	0.010783	0.0300923	A	G	30.4183
A2J10_09T0211700.1	protein kinase family protein, Putative, expressed	protein kinase family protein, Putative, expressed	Serine/threonine protein kinase-related domain containing protein.	0.325106	0.007942	0.024429	T	C	67
A2J10_09T0211700.1	protein kinase family protein, Putative, expressed	protein kinase family protein, Putative, expressed	Serine/threonine protein kinase-related domain containing protein.	0.325106	0.007942	0.024429	A	C	54
A2J10_09T0211700.1	protein kinase family protein, Putative, expressed	protein kinase family protein, Putative, expressed	Serine/threonine protein kinase-related domain containing protein.	0.325106	0.007942	0.024429	A	G	30.4183
A2J10_09T0211700.1	protein kinase family protein, Putative, expressed	protein kinase family protein, Putative, expressed	Serine/threonine protein kinase-related domain containing protein.	0.325106	0.007942	0.024429	A	C	30.4183
A2J10_05T0036000.1	PHD finger protein, Putative, expressed	PHD finger protein, Putative, expressed	Similar to PHD finger protein.	0.816259	0.015064	0.0184549	C	T	30.4183
A2J10_07T0045200.1	targeting protein for Xklp2, Putative, expressed	#N/A	#N/A	4.9933	0.070351	0.0140891	C	T	80
A2J10_07T0045200.1	targeting protein for Xklp2, Putative, expressed	#N/A	#N/A	4.9933	0.070351	0.0140891	T	A	30.4183
A2J10_01T0477800.5	exostosin family domain containing protein, expressed	#N/A	#N/A	0.311254	0.002616	0.00840471	T	A	30.4183
A2J10_01T0477800.5	exostosin family domain containing protein, expressed	#N/A	#N/A	0.311254	0.002616	0.00840471	C	T	30.4183
A2J10_03T0024900.1	MLO domain containing protein, Putative, expressed	#N/A	#N/A	1.66343	0.00689	0.00414205	T	C	30.4183
A2J10_01T0023800.1	proteasome subunit, Putative, expressed	proteasome subunit, Putative, expressed	26S proteasome 19S regulatory particle non-ATPase subunit 6	1.31344	0.004609	0.0035091	C	G	30.4183
A2J10_03T0243700.1	DIRP family protein, Putative, expressed	DIRP family protein, Putative, expressed	Similar to DIRP family protein, expressed.	1.66145	0.002783	0.00167505	C	A	228
A2J10_03T0243700.1	DIRP family protein, Putative, expressed	DIRP family protein, Putative, expressed	Similar to DIRP family protein, expressed.	1.66145	0.002783	0.00167505	A	G	228
A2J10_03T0243700.1	DIRP family protein, Putative, expressed	DIRP family protein, Putative, expressed	Similar to DIRP family protein, expressed.	1.66145	0.002783	0.00167505	G	T	21.4455
A2J10_07T0039700.2	Putative expressed protein	#N/A	#N/A	0.858616	0.001259	0.00146631	G	T	30.4183
A2J10_01T0231200.2	Conserved hypothetical protein	#N/A	#N/A	0.012033	0	0	T	G	32.4168
A2J10_01T0208300.2	peptidyl-prolyl isomerase, Putative, expressed	peptidyl-prolyl isomerase, Putative, expressed	#N/A	0.012185	0	0	G	T	30.4183
A2J10_06T0046500.1	ORC1 - Putative origin recognition complex subunit 1, expressed	ORC1 - Putative origin recognition complex subunit 1, expressed	Origin recognition complex subunit 1, DNA replication, Cell proliferation	0.014995	0	0	T	C	44.4146
A2J10_06T0242300.5	Putative Leucine Rich Repeat family protein, expressed	#N/A	#N/A	0.016132	0	0	G	T	30.4183
A2J10_01T0182700.1	Conserved hypothetical protein	#N/A	#N/A	0.018743	0	0	T	C	30.4183
A2J10_07T0270300.1	methyltransferase domain containing protein, Putative, expressed	methyltransferase domain containing protein, Putative, expressed	Similar to Methlytransferase, UbiE/COQ5 family.	0.019124	0	0	C	T	30.4183
A2J10_09T0199600.1	helicase, Putative, expressed	serine/threonine-protein kinase SRPK1, Putative, expressed	Protein kinase, core domain containing protein.	0.020805	0	0	A	T	30.4183
A2J10_06T0176500.6	HEAT repeat family protein, Putative, expressed	#N/A	#N/A	0.022597	0	0	A	T	21.4455
A2J10_01T0232900.3	S1 RNA binding domain containing protein, expressed	#N/A	#N/A	0.024414	0	0	G	A	30.4183
A2J10_11T0151700.1	amidase, Putative, expressed	amidase, Putative, expressed	Amidase family protein.	0.028667	0	0	G	C	30.4183
A2J10_02T0066300.1	PHD-finger domain containing protein, Putative, expressed	#N/A	#N/A	0.029895	0	0	C	T	30.4183
A2J10_03T0136700.1	Conserved hypothetical protein	#N/A	#N/A	0.030642	0	0	G	A	30.4183
A2J10_06T0013000.1	expressed protein	expressed protein	Protein of unknown function DUF594 family protein.	0.030678	0	0	T	C	73
A2J10_06T0013000.1	expressed protein	expressed protein	Protein of unknown function DUF594 family protein.	0.030678	0	0	T	C	30.4183
A2J10_02T0198800.1	SAM domain family protein, expressed	#N/A	#N/A	0.030952	0	0	A	G	30.4183
A2J10_05T0095100.1	glyoxalase family protein, Putative, expressed	#N/A	#N/A	0.031565	0	0	G	A	30.4183
A2J10_02T0335100.1	BSD domain-containing protein, Putative, expressed	BSD domain-containing protein, Putative, expressed	BSD domain containing protein.	0.032658	0	0	C	T	225
A2J10_07T0238200.1	transposon protein, Putative, unclassified, expressed	#N/A	#N/A	0.033132	0	0	T	C	30.4183
A2J10_08T0012400.1	Conserved hypothetical protein	Conserved hypothetical protein	CCT domain domain containing protein.	0.033225	0	0	A	T	30.4183
A2J10_01T0238400.1	expressed protein	expressed protein	Similar to cDNA clone:001-043-A08, full insert sequence.	0.033989	0	0	T	C	225
A2J10_01T0238400.1	expressed protein	expressed protein	Similar to cDNA clone:001-043-A08, full insert sequence.	0.033989	0	0	G	T	216
A2J10_11T0092900.1	haloacid dehalogenase-like hydrolase family protein, Putative, expressed	#N/A	#N/A	0.034007	0	0	C	A	30.4183
A2J10_03T0312300.1	deoxyhypusine synthase, Putative, expressed	#N/A	#N/A	0.034641	0	0	A	G	170
A2J10_09T0123300.2	glutamate receptor 2.6 precursor, Putative, expressed	#N/A	#N/A	0.03683	0	0	C	A	30.4183
A2J10_11T0194100.3	Conserved hypothetical protein	#N/A	#N/A	0.041452	0	0	G	T	30.4183
A2J10_10T0002300.1	notchless protein, Putative, expressed	#N/A	#N/A	0.042614	0	0	C	A	30.4183
A2J10_10T0002300.1	notchless protein, Putative, expressed	#N/A	#N/A	0.042614	0	0	C	G	30.4183
A2J10_01T0123600.1	OsSubt1 - Putative Subtilisin homologue, expressed	OsSubt1 - Putative Subtilisin homologue, expressed	Zinc finger, DHHC-type domain containing protein.	0.044634	0	0	C	T	21.4455
A2J10_03T0046500.1	calmodulin-binding transcription activator, Putative, expressed	calmodulin-binding transcription activator, Putative, expressed	Ca<sup>2+</sup>/CaM-associated transcription factor, Negative regulation of thermotolerance	0.048042	0	0	T	C	190
A2J10_03T0274500.1	expressed protein	#N/A	#N/A	0.048176	0	0	G	T	30.4183
A2J10_01T0372200.1	Conserved hypothetical protein	membrane-associated salt-inducible protein, Putative, expressed	Pentatricopeptide repeat domain containing protein.	0.048973	0	0	T	C	103
A2J10_09T0090400.1	CD2-binding protein-related, Putative, expressed	CD2-binding protein-related, Putative, expressed	Similar to cDNA clone:J033042L23, full insert sequence.	0.052547	0	0	A	G	76
A2J10_09T0090400.1	CD2-binding protein-related, Putative, expressed	CD2-binding protein-related, Putative, expressed	Similar to cDNA clone:J033042L23, full insert sequence.	0.052547	0	0	A	G	155
A2J10_09T0090400.1	CD2-binding protein-related, Putative, expressed	CD2-binding protein-related, Putative, expressed	Similar to cDNA clone:J033042L23, full insert sequence.	0.052547	0	0	A	G	85
A2J10_09T0090400.1	CD2-binding protein-related, Putative, expressed	CD2-binding protein-related, Putative, expressed	Similar to cDNA clone:J033042L23, full insert sequence.	0.052547	0	0	A	T	21.4455
A2J10_08T0119500.1	Conserved hypothetical protein	#N/A	#N/A	0.055374	0	0	C	T	30.4183
A2J10_03T0305500.2	calcium-transporting ATPase 3, endoplasmic reticulum-type, Putative, expressed	#N/A	#N/A	0.056034	0	0	A	G	30.4183
A2J10_09T0044200.1	oxidoreductase domain protein, Putative, expressed	#N/A	#N/A	0.057936	0	0	C	T	30.4183
A2J10_02T0369300.1	SNF2 family N-terminal domain containing protein, expressed	#N/A	#N/A	0.065311	0	0	G	A	30.4183
A2J10_12T0172200.1	Putative Protein kinase domain containing protein, expressed	Protein kinase domain containing protein, expressed	#N/A	0.066661	0	0	A	G	30.4183
A2J10_07T0245700.1	GTPase of unknown function domain containing protein, Putative, expressed	#N/A	#N/A	0.070814	0	0	G	T	30.4183
A2J10_07T0245700.1	GTPase of unknown function domain containing protein, Putative, expressed	#N/A	#N/A	0.070814	0	0	C	A	30.4183
A2J10_07T0184300.1	cyclin, Putative, expressed	cyclin, Putative, expressed	Cyclin D domain containing protein.	0.07986	0	0	A	G	225
A2J10_07T0184300.1	cyclin, Putative, expressed	cyclin, Putative, expressed	Cyclin D domain containing protein.	0.07986	0	0	G	A	136
A2J10_08T0020500.1	expressed protein	#N/A	#N/A	0.08254	0	0	A	G	30.4183
A2J10_04T0151100.2	WD domain, G-beta repeat domain containing protein, expressed	#N/A	#N/A	0.085231	0	0	C	T	30.4183
A2J10_09T0092100.1	serine/threonine-protein kinase, Putative, expressed	serine/threonine-protein kinase, Putative, expressed	Similar to Protein kinase family protein.	0.087824	0	0	T	C	30.4183
A2J10_01T0093200.1	importin-alpha re-exporter, Putative, expressed	importin-alpha re-exporter, Putative, expressed	Similar to predicted protein.	0.089509	0	0	C	A	30.4183
A2J10_03T0319800.1	strictosidine synthase, Putative, expressed	strictosidine synthase, Putative, expressed	Six-bladed beta-propeller, TolB-like domain containing protein.	0.090774	0	0	A	G	117
A2J10_01T0501400.1	Conserved hypothetical protein	#N/A	#N/A	0.098784	0	0	G	C	25.4267
A2J10_09T0035600.1	cytochrome P450, Putative, expressed	#N/A	#N/A	0.099906	0	0	C	T	131
A2J10_02T0366300.1	helix-loop-helix DNA-binding protein, Putative, expressed	helix-loop-helix DNA-binding protein, Putative, expressed	Similar to DNA binding protein.	0.10263	0	0	C	G	30.4183
A2J10_01T0106500.1	Conserved hypothetical protein	#N/A	#N/A	0.105071	0	0	G	T	30.4183
A2J10_07T0200200.1	beta-hexosaminidase precursor, Putative, expressed	beta-hexosaminidase precursor, Putative, expressed	Similar to beta-hexosaminidase.	0.118326	0	0	A	G	157
A2J10_07T0200200.1	beta-hexosaminidase precursor, Putative, expressed	beta-hexosaminidase precursor, Putative, expressed	Similar to beta-hexosaminidase.	0.118326	0	0	T	C	139
A2J10_06T0182900.1	Putative SNF2 family N-terminal domain containing protein, expressed	#N/A	#N/A	0.138033	0	0	C	T	30.4183
A2J10_01T0345600.1	putativ eribonuclease P, Putative, expressed	putativ eribonuclease P, Putative, expressed	Similar to Putativ eribonuclease P.	0.139216	0	0	G	A	21.4455
A2J10_11T0059200.1	Putative OsFBX411 - F-box domain containing protein, expressed	#N/A	#N/A	0.141199	0	0	C	A	30.4183
A2J10_07T0142700.1	beta-expansin precursor, Putative, expressed	beta-expansin precursor, Putative, expressed	Similar to Expansin-like B1.	0.145087	0	0	C	T	30.4183
A2J10_11T0037100.1	homeodomain, Putative, expressed	#N/A	Similar to Tubby-like F-box protein 13.	0.150928	0	0	T	C	30.4183
A2J10_05T0266600.1	Putative expressed protein	#N/A	#N/A	0.162941	0	0	G	A	30.4183
A2J10_10T0003400.1	Conserved hypothetical protein	#N/A	Conserved hypothetical protein.	0.165017	0	0	A	G	30.4183
A2J10_10T0003400.1	Conserved hypothetical protein	#N/A	Conserved hypothetical protein.	0.165017	0	0	C	A	30.4183
A2J10_08T0128000.1	Doubtful hypothetical protein	#N/A	#N/A	0.182632	0	0	T	C	75
A2J10_08T0128000.1	Doubtful hypothetical protein	#N/A	#N/A	0.182632	0	0	A	G	60
A2J10_08T0151700.1	no apical meristem protein, Putative, expressed	no apical meristem protein, Putative, expressed	NAC transcription factor, Tolerance to salinity stress	0.182828	0	0	A	G	30.8858
A2J10_08T0151700.1	no apical meristem protein, Putative, expressed	no apical meristem protein, Putative, expressed	NAC transcription factor, Tolerance to salinity stress	0.182828	0	0	A	G	56
A2J10_08T0151700.1	no apical meristem protein, Putative, expressed	no apical meristem protein, Putative, expressed	NAC transcription factor, Tolerance to salinity stress	0.182828	0	0	G	A	225
A2J10_08T0151700.1	no apical meristem protein, Putative, expressed	no apical meristem protein, Putative, expressed	NAC transcription factor, Tolerance to salinity stress	0.182828	0	0	G	C	225
A2J10_08T0151700.1	no apical meristem protein, Putative, expressed	no apical meristem protein, Putative, expressed	NAC transcription factor, Tolerance to salinity stress	0.182828	0	0	C	G	104
A2J10_01T0075100.1	O-methyltransferase, Putative, expressed	#N/A	#N/A	0.193156	0	0	G	A	205
A2J10_09T0208400.1	Putative prephenate dehydratase domain containing protein, expressed	#N/A	#N/A	0.195143	0	0	G	T	30.4183
A2J10_03T0244200.1	SNF7 domain containing protein, Putative, expressed	SNF7 domain containing protein, Putative, expressed	Snf7 family protein.	0.196219	0	0	T	A	30.4183
A2J10_12T0077200.1	expressed protein	expressed protein	Conserved hypothetical protein.	0.216399	0	0	T	C	21.4455
A2J10_12T0065600.1	Conserved hypothetical protein	#N/A	#N/A	0.218187	0	0	C	T	30.4183
A2J10_12T0065600.1	Conserved hypothetical protein	#N/A	#N/A	0.218187	0	0	C	T	30.4183
A2J10_01T0336200.2	expressed protein	expressed protein	Similar to predicted protein.	0.218266	0	0	G	A	30.4183
A2J10_07T0122300.1	Putative NB-ARC domain containing protein, expressed	#N/A	#N/A	0.223636	0	0	A	G	30.4183
A2J10_03T0058100.1	MATE efflux family protein, Putative, expressed	MATE efflux family protein, Putative, expressed	MATE (multidrug and toxic compounds extrusion) transporter, Regulation of grain size, Modulation of flavonoid and lignin biosynthesis	0.232455	0	0	G	T	30.4183
A2J10_01T0037100.1	gamma-glutamyltranspeptidase 1 precursor, Putative, expressed	expressed protein	Conserved hypothetical protein.	0.260935	0	0	G	C	30.4183
A2J10_02T0025800.1	zinc finger, C3HC4 type family protein, expressed	zinc finger, C3HC4 type family protein, expressed	C4HC3 RING-type E3-ubiquitin ligase, Positive regulation of salinity response via Na<sup>+</sup> uptake	0.265748	0	0	G	T	30.4183
A2J10_09T0198600.1	NIN, Putative, expressed	#N/A	#N/A	0.282951	0	0	G	A	30.4183
A2J10_05T0230100.1	HSF-type DNA-binding domain containing protein, expressed	#N/A	#N/A	0.290588	0	0	T	C	30.4183
A2J10_04T0198100.1	Conserved hypothetical protein	Putative expressed protein	Cyclin-like F-box domain containing protein.	0.294759	0	0	A	T	30.4183
A2J10_01T0152600.2	ECT protein, Putative, expressed	#N/A	#N/A	0.296798	0	0	A	G	30.4183
A2J10_02T0151500.1	NOL1/NOP2/sun family protein, Putative, expressed	#N/A	#N/A	0.298242	0	0	A	T	150
A2J10_02T0151500.1	NOL1/NOP2/sun family protein, Putative, expressed	#N/A	#N/A	0.298242	0	0	T	A	123
A2J10_02T0151500.1	NOL1/NOP2/sun family protein, Putative, expressed	#N/A	#N/A	0.298242	0	0	C	A	32.6622
A2J10_02T0151500.1	NOL1/NOP2/sun family protein, Putative, expressed	#N/A	#N/A	0.298242	0	0	G	C	97
A2J10_02T0151500.1	NOL1/NOP2/sun family protein, Putative, expressed	#N/A	#N/A	0.298242	0	0	G	A	30.4183
A2J10_01T0005100.1	Putative expressed protein	Putative expressed protein	Protein of unknown function DUF936, plant family protein.	0.317864	0	0	G	A	30.4183
A2J10_05T0084200.1	endoribonuclease Dicer, Putative, expressed	endoribonuclease Dicer, Putative, expressed	Hypothetical conserved gene.	0.31893	0	0	T	C	30.4183
A2J10_03T0398100.1	la domain containing protein, Putative, expressed	#N/A	#N/A	0.335971	0	0	C	T	191
A2J10_07T0057700.1	Putative expressed protein	#N/A	#N/A	0.360399	0	0	G	A	97
A2J10_07T0057700.1	Putative expressed protein	#N/A	#N/A	0.360399	0	0	T	C	75
A2J10_07T0057700.1	Putative expressed protein	#N/A	#N/A	0.360399	0	0	T	A	30.4183
A2J10_05T0018300.1	Putative TKL_IRAK_DUF26-ld.6 - DUF26 kinases have homology to DUF26 containing loci, expressed	TKL_IRAK_DUF26-ld.6 - DUF26 kinases have homology to DUF26 containing loci, expressed	Similar to KI domain interacting kinase 1.	0.372461	0	0	T	C	20.0839
A2J10_05T0018300.1	Putative TKL_IRAK_DUF26-ld.6 - DUF26 kinases have homology to DUF26 containing loci, expressed	TKL_IRAK_DUF26-ld.6 - DUF26 kinases have homology to DUF26 containing loci, expressed	Similar to KI domain interacting kinase 1.	0.372461	0	0	G	A	83
A2J10_04T0191900.1	SET domain protein 123, Putative, expressed	SET domain protein 123, Putative, expressed	Similar to SET domain protein 123.	0.467305	0	0	A	G	21.4455
A2J10_06T0113600.1	Conserved hypothetical protein	#N/A	#N/A	0.616433	0	0	A	G	27.4222
A2J10_01T0458900.1	methyltransferase, Putative, expressed	#N/A	#N/A	0.619409	0	0	T	C	37.4152
A2J10_04T0086600.1	Conserved hypothetical protein	#N/A	#N/A	0.669967	0	0	T	C	30.4183
A2J10_11T0225200.1	oxidoreductase, 2OG-Fe oxygenase family protein, Putative, expressed	#N/A	#N/A	0.8807	0	0	G	A	30.4183
A2J10_01T0278900.1	viral A-type inclusion protein repeat containing protein, expressed	#N/A	#N/A	0.967507	0	0	T	A	30.4183
A2J10_05T0005600.1	TOO MANY MOUTHS precursor, Putative, expressed	#N/A	#N/A	0.986379	0	0	A	G	30.4183
A2J10_03T0117700.1	alpha-N-arabinofuranosidase A, Putative, expressed	#N/A	Alpha-L-arabinofuranosidase, C-terminal domain containing protein.	1.03598	0	0	T	C	30.4183
A2J10_07T0113600.2	alcohol oxidase, Putative, expressed	alcohol oxidase, Putative, expressed	Similar to GMC oxidoreductase family protein, expressed.	1.04054	0	0	G	T	30.4183
A2J10_03T0181200.1	Ser/Thr protein phosphatase family protein, Putative, expressed	Ser/Thr protein phosphatase family protein, Putative, expressed	Metallophosphoesterase domain containing protein.	1.05956	0	0	G	A	25.4267
A2J10_04T0083600.1	nuclear transport factor 2, Putative, expressed	nuclear transport factor 2, Putative, expressed	Nucleotide-binding, alpha-beta plait domain containing protein.	1.16851	0	0	A	G	30.4183
A2J10_05T0082300.3	CRAL/TRIO domain containing protein, expressed	#N/A	#N/A	1.32754	0	0	G	C	30.4183
A2J10_02T0192500.3	phytosulfokine receptor precursor, Putative, expressed	#N/A	Conserved hypothetical protein.	2.72208	0	0	G	T	30.4183
A2J10_05T0191600.1	Hypothetical protein	#N/A	#N/A	2.89974	0	0	A	G	228
A2J10_05T0191600.1	Hypothetical protein	#N/A	#N/A	2.89974	0	0	G	A	206
A2J10_06T0295400.1	calcium-dependent protein kinase CPK1 adapter protein 2, Putative, expressed	calcium-dependent protein kinase CPK1 adapter protein 2, Putative, expressed	t-snare domain containing protein.	6.4312	0	0	A	T	30.4183
A2J10_08T0219200.1	NB-ARC domain containing protein, expressed	#N/A	#N/A	33.0994	0	0	A	G	30.4183

## Sheet: Figure_16
Table s9. List of SNP and Indels.
Gene ID				REF	ALT	N22	M-507	M-507/N22	QUAL
A2J10_03T0122500.1	expressed protein	#N/A	#N/A	GTATAT	GTAT	0.075116	0	0	20.4535
A2J10_06T0254700.1	clathrin assembly protein, Putative, expressed	ANTH/ENTH domain containing protein, Putative, expressed	AP180 N-terminal homology (ANTH) domain-containing protein, Pollen germination	GAAAAAAA	GAAAAAAAA	1.32041	0	0	56
A2J10_06T0277500.1	peroxidase precursor, Putative, expressed	#N/A	#N/A	GA	GATA	0.113911	0	0	28.2931
A2J10_06T0303800.1	expressed protein	#N/A	#N/A	TGG	TG	0.117655	0	0	32.4168
A2J10_08T0148400.1	OsMADS27 - MADS-box family gene with MIKCc type-box, expressed	#N/A	#N/A	GGCGCG	GGCG	0.141422	0	0	39.4149
A2J10_09T0040700.1	heavy metal transport/detoxification protein, Putative, expressed	#N/A	#N/A	TAAAAAAAA	TAAAAAAAAA	13.7954	0	0	25.6068
A2J10_08T0045900.1	vacuolar protein sorting-associated protein 18, Putative, expressed	vacuolar protein sorting-associated protein 18, Putative, expressed	Pep3/Vps18/deep orange domain containing protein.	CGGGGG	CGGGGGG	0.990554	0.015919	0.0160708	37.4152
A2J10_05T0206800.1	zinc finger C-x8-C-x5-C-x3-H type family protein, expressed	zinc finger C-x8-C-x5-C-x3-H type family protein, expressed	Hypothetical conserved gene.	TCACA	TCA	0.501147	0.00989	0.0197347	58
A2J10_04T0219400.7	Conserved hypothetical protein	#N/A	#N/A	GAAAA	GAA	0.010746	0.000387	0.0360134	20.4535
A2J10_05T0113100.1	expressed protein	expressed protein	Tetratricopeptide-like helical domain containing protein.	A	AAT	1.54348	0.151001	0.0978316	30.4183
A2J10_12T0030200.1	aldehyde dehydrogenase, Putative, expressed	#N/A	#N/A	CAATAA	CAA	0.783054	0.082614	0.105502	30.4183
A2J10_06T0017700.1	myristoyl-acyl carrier protein thioesterase, chloroplast precursor, Putative, expressed	#N/A	#N/A	AATA	AA	17.6567	2.60324	0.147436	45.4146
A2J10_04T0057200.1	jasmonate-induced protein, Putative, expressed	jasmonate-induced protein, Putative, expressed	Mannose-binding lectin domain containing protein.	TTATAT	TTAT	2.00167	0.499912	0.249748	20.4535
A2J10_02T0094400.1	expressed protein	expressed protein	Conserved hypothetical protein.	GACAACA	GACA	0.039485	0.011177	0.28307	44.4146
A2J10_04T0105700.1	NAD dependent epimerase/dehydratase family protein, Putative, expressed	#N/A	#N/A	GCCCCCC	GCCCCCCC	0.24399	0.073611	0.301697	21.0141
A2J10_02T0319200.1	soluble inorganic pyrophosphatase, Putative, expressed	soluble inorganic pyrophosphatase, Putative, expressed	Similar to Inorganic pyrophosphatase-like protein.	TCCC	TCCCC	0.054578	0.018947	0.347155	112
A2J10_04T0039800.1	expressed protein	expressed protein	Similar to protein binding protein.	GTTAT	GT	0.134504	0.048143	0.35793	28.2931
A2J10_12T0003900.2	Putative BTBN22 - Bric-a-Brac, Tramtrack, Broad Complex BTB domain with non-phototropic hypocotyl 3 NPH3 and coiled-coil domains, expressed	#N/A	#N/A	GCC	GCCC	0.165514	0.068618	0.414575	56
A2J10_02T0186700.1	Putative AP2 domain containing protein, expressed	#N/A	#N/A	GCCCCCC	GCCCCCCC	1.57028	0.667712	0.425218	42.9011
A2J10_09T0186700.1	Conserved hypothetical protein	#N/A	#N/A	CAA	CAAA	2.78717	1.42584	0.511572	82
A2J10_05T0016800.2	ribosomal protein L28 protein, Putative, expressed	#N/A	#N/A	CTTTT	CTTTTT	0.4376	0.261547	0.597685	65
A2J10_03T0239200.1	prefoldin subunit, Putative, expressed	prefoldin subunit, Putative, expressed	Prefoldin domain containing protein.	GCCTCCT	GCCT	2.22165	3.25178	1.46368	58
A2J10_02T0326400.1	expressed protein	expressed protein	Tetratricopeptide-like helical domain containing protein.	CCAC	CC	3.06025	4.48287	1.46487	24.4299
A2J10_09T0035300.1	Conserved hypothetical protein	#N/A	#N/A	T	TA	5.91792	8.67243	1.46545	46.5916
A2J10_05T0114800.1	expressed protein	expressed protein	#N/A	G	GC	1.85989	2.77126	1.49001	90
A2J10_09T0172800.1	DAG protein, chloroplast precursor, Putative, expressed	mitochondrial carrier protein, Putative, expressed	Similar to cDNA clone:001-044-E12, full insert sequence.	GAGA	G	2.57052	3.92426	1.52664	28.2931
A2J10_04T0041700.1	flavin-containing monooxygenase family protein, Putative, expressed	flavin-containing monooxygenase family protein, Putative, expressed	Dimethylaniline monooxygenase, N-oxide-forming domain containing protein.	AATAT	AAT	0.073243	0.112049	1.52983	35.4156
A2J10_02T0270400.1	peptidase, T1 family, Putative, expressed	#N/A	#N/A	CGTGTG	CGTG	6.0371	9.27889	1.53698	21.4454
A2J10_03T0158500.1	Conserved hypothetical protein	#N/A	#N/A	TCC	TCCC	0.187107	0.293486	1.56855	123
A2J10_08T0078800.1	Putative expressed protein	expressed protein	Similar to Glutamyl-tRNA reductase binding protein.	TCC	TCCC	2.84852	4.68329	1.64411	68
A2J10_05T0031700.1	nifU, Putative, expressed	nifU, Putative, expressed	Similar to HIRA interacting protein 5.	TCCCCC	TCCCCCC	2.76458	4.63205	1.67549	40.4148
A2J10_10T0097100.1	OsFBL52 - F-box domain and LRR containing protein, expressed	OsFBL52 - F-box domain and LRR containing protein, expressed	Leucine-rich repeat, cysteine-containing containing protein.	CTTTTT	CTTTTTT	5.16809	8.80977	1.70465	81
A2J10_01T0298800.1	arginine/serine-rich coiled-coil protein 1, Putative, expressed	arginine/serine-rich coiled-coil protein 1, Putative, expressed	Similar to Arginine/serine-rich coiled coil protein 1.	AATAT	AAT	0.156975	0.26876	1.71212	21.4454
A2J10_04T0253900.1	Conserved hypothetical protein	#N/A	#N/A	AG	AGG	0.563812	0.971793	1.72361	30.7444
A2J10_06T0065700.1	cyclin, Putative, expressed	cyclin, Putative, expressed	Similar to Cyclin-D3-1.	ATG	A	0.40887	0.725724	1.77495	27.4221
A2J10_06T0169000.1	Putative OsFBD12 - F-box and FBD domain containing protein, expressed	OsFBD12 - F-box and FBD domain containing protein, expressed	Hypothetical protein.	AGGGG	AGGGGG	0.173781	0.310126	1.78458	93
A2J10_05T0015700.1	expressed protein	#N/A	Conserved hypothetical protein.	CAAAA	CAA	0.96923	1.73075	1.78569	20.4535
A2J10_05T0099500.2	DnaK family protein, Putative, expressed	#N/A	#N/A	CAAAAA	CAAAAAA	0.103296	0.192534	1.86391	44.8588
A2J10_06T0121600.1	mitochondrial ribosomal protein S7, Putative, expressed	#N/A	#N/A	CAA	CA	90.6806	176.723	1.94885	101
A2J10_12T0061300.1	Plant PDR ABC transporter associated domain containing protein, expressed	Plant PDR ABC transporter associated domain containing protein, expressed	Conserved hypothetical protein.	CTT	C	0.279894	0.550092	1.96536	27.4221
A2J10_06T0148400.1	FKBP12-interacting protein of 37 kDa, Putative, expressed	FKBP12-interacting protein of 37 kDa, Putative, expressed	Subunit of RNA N6-methyladenosine methyltransferase, Regulation of sporogenesis and embryo development, Male gametogenesis	CTTTT	CTT	1.65641	3.27072	1.97459	20.4535
A2J10_02T0376600.4	Putative AGC_PVPK_like_CDK8.1 - ACG kinases include homologs to PKA, PKG and PKC, expressed	#N/A	#N/A	GATAT	GAT	0.374834	0.750319	2.00174	20.4535
A2J10_11T0166800.1	leucine rich repeat protein, Putative, expressed	leucine rich repeat protein, Putative, expressed	Leucine-rich repeat domain containing protein.	TAAAA	TAAAAA	0.151747	0.306402	2.01916	66
A2J10_02T0412600.1	aquaporin protein, Putative, expressed	aquaporin protein, Putative, expressed	#N/A	TAAA	TA	8.71187	17.6364	2.02441	24.4299
A2J10_07T0014500.1	GCRP3 - Glycine and cysteine rich family protein precursor, expressed	GCRP3 - Glycine and cysteine rich family protein precursor, expressed	Similar to cold shock protein-1.	CTATAT	CTAT	1.07116	2.18768	2.04235	21.4454
A2J10_03T0381600.1	S1 RNA binding domain containing protein, expressed	#N/A	#N/A	AATGA	AA	0.099188	0.20286	2.04521	30.4183
A2J10_10T0185500.5	Putative expressed protein	#N/A	#N/A	GTATA	GTA	0.005628	0.011687	2.07658	22.4391
A2J10_07T0221200.1	FAD binding domain of DNA photolyase domain containing protein, expressed	#N/A	#N/A	TCCCCC	TCCCCCC	2.50779	5.20763	2.07658	63
A2J10_07T0221200.1	FAD binding domain of DNA photolyase domain containing protein, expressed	#N/A	#N/A	ACCCCCC	ACCCCCCC	2.50779	5.20763	2.07658	55
A2J10_10T0001300.1	PHLOEM 2-LIKE A10, Putative, expressed	PHLOEM 2-LIKE A10, Putative, expressed	Similar to CF9.	CGATGA	CGA	0.35389	0.766787	2.16674	30.4183
A2J10_04T0320400.1	ZOS4-07 - C2H2 zinc finger protein, expressed	ZOS4-07 - C2H2 zinc finger protein, expressed	Zinc finger, C2H2-type domain containing protein.	GTTTT	GTT	0.032318	0.071003	2.19701	20.4535
A2J10_04T0077700.1	rp1, Putative, expressed	#N/A	#N/A	CCT	C	0.288651	0.640655	2.21948	26.4242
A2J10_12T0063100.1	DnaK family protein, Putative, expressed	DnaK family protein, Putative, expressed	Chloroplast-localized heat shock protein 70, Chloroplast differentiation under high temperature	CTAATA	CTA	10.9126	24.4174	2.23755	48.4146
A2J10_01T0090200.1	ubiquitin-conjugating enzyme, Putative, expressed	#N/A	#N/A	TAAA	TA	0.066723	0.150298	2.25257	23.434
A2J10_02T0014300.1	expressed protein	expressed protein	S-adenosyl-L-methionine dependent methyltransferase, Mett10D, predicted domain containing protein.	ACTCT	ACT	0.847806	1.92371	2.26904	20.3072
A2J10_04T0325900.1	ABC-2 type transporter domain containing protein, expressed	ABC-2 type transporter domain containing protein, expressed	Hypothetical conserved gene.	T	TTA	0.017278	0.039264	2.27249	32.4168
A2J10_10T0081000.1	apocytochrome f precursor, Putative, expressed	#N/A	#N/A	AC	ACC	175.427	405.234	2.30998	41.4234
A2J10_10T0081000.1	apocytochrome f precursor, Putative, expressed	#N/A	#N/A	TCCC	TCCCC	175.427	405.234	2.30998	28.3051
A2J10_11T0223300.3	NBS-LRR type disease resistance protein, Putative, expressed	#N/A	#N/A	ACT	A	0.103439	0.243844	2.35737	26.4242
A2J10_06T0115200.2	GRAM and C2 domains containing protein, Putative, expressed	#N/A	#N/A	TAGA	TA	2.23331	5.26807	2.35887	23.434
A2J10_07T0143600.1	Conserved hypothetical protein	#N/A	#N/A	CTTTTTTT	CTTTTTTTT	3.00999	7.2852	2.42034	20.6696
A2J10_05T0161100.1	expressed protein	#N/A	#N/A	TCCCC	TCCCCC	2.51019	6.22979	2.4818	86
A2J10_04T0286100.1	allantoinase, Putative, expressed	allantoinase, Putative, expressed	Allantoinase (EC:3.5.2.5), Ureide metabolism, Nitrogen molecular sensor	AACA	AA	0.834094	2.21406	2.65445	23.434
A2J10_01T0304300.2	vesicle transport v-SNARE protein, Putative, expressed	#N/A	Similar to vesicle transport v-SNARE 13.	CAA	CAAA	1.55568	4.52189	2.90669	152
A2J10_05T0248400.1	protein kinase domain containing protein, expressed	protein kinase domain containing protein, expressed	Similar to phytosulfokine receptor.	CGGG	CG	0.152351	0.468461	3.07488	23.434
A2J10_01T0133700.1	OsFBL16 - F-box domain and LRR containing protein, expressed	#N/A	#N/A	TAAAAAA	TAAAAAAA	0.041691	0.128528	3.08287	61
A2J10_03T0020100.1	Conserved hypothetical protein	#N/A	#N/A	TCCCC	TCCCCC	2.50232	7.97329	3.18636	53
A2J10_05T0221600.1	NADH-ubiquinone oxidoreductase chain 4, Putative, expressed	#N/A	#N/A	CCCT	C	30.9079	99.6558	3.22429	228
A2J10_05T0221600.1	NADH-ubiquinone oxidoreductase chain 4, Putative, expressed	#N/A	#N/A	CCCTCC	CCC	30.9079	99.6558	3.22429	173
A2J10_09T0035400.1	cytochrome c oxidase subunit 1, Putative, expressed	ELF protein, expressed	#N/A	GC	GCC	204.207	663.943	3.25132	144
A2J10_10T0078700.1	laccase-15 precursor, Putative, expressed	laccase-15 precursor, Putative, expressed	Cupredoxin domain containing protein.	TGGGGG	TGGGGGG	0.172543	0.580509	3.36443	22.9888
A2J10_07T0214500.1	SNF2 domain-containing protein, Putative, expressed	SNF2 domain-containing protein, Putative, expressed	Hypothetical conserved gene.	GTCTCT	GTCT	0.037251	0.127417	3.4205	21.4454
A2J10_01T0024900.1	expressed protein	#N/A	#N/A	TGGGG	TGGGGG	0.080073	0.294703	3.68043	25.2231
A2J10_04T0240300.7	protein kinase domain containing protein, expressed	protein kinase domain containing protein, expressed	Similar to H0525G02.9 protein.	CAAAAA	CAAA	0.008062	0.031488	3.90573	43.4147
A2J10_12T0091700.1	beta-galactosidase precursor, Putative, expressed	#N/A	#N/A	CAAA	CAAAA	0.042519	0.167794	3.94633	21.7755
A2J10_05T0153300.1	gibberellin receptor GID1L2, Putative, expressed	gibberellin receptor GID1L2, Putative, expressed	Soluble gibberellin receptor, Gibberellin signaling	CGTGTG	CGTG	2.28224	9.16156	4.01429	21.4454
A2J10_05T0183100.1	VHS and GAT domain containing protein, expressed	VHS and GAT domain containing protein, expressed	VHS domain containing protein.	GTAA	G	0.574286	2.60593	4.53768	25.4267
A2J10_09T0203100.1	cysteinyl-tRNA synthetase, Putative, expressed	cysteinyl-tRNA synthetase, Putative, expressed	Cysteinyl-tRNA synthetase, class Ia family protein.	CAAAAAA	CAAAAAAA	0.528962	2.4816	4.69146	28.2337
A2J10_06T0147100.2	pentatricopeptide, Putative, expressed	pentatricopeptide, Putative, expressed	Pentatricopeptide repeat domain containing protein.	ACCCCC	ACCCCCC	0.039277	0.186424	4.74639	21.4454
A2J10_03T0275300.1	RNA methyltransferase, TrmH family protein, Putative, expressed	RNA methyltransferase, TrmH family protein, Putative, expressed	tRNA/rRNA methyltransferase, SpoU domain containing protein.	GGAGAGAGAGAGAGAGAGAGAGAGAGAGA	GGAGAGAGAGAGAGAGAGAGAGAGAGA	0.188929	1.08002	5.71655	33.4163
A2J10_03T0253600.1	anthranilate phosphoribosyltransferase, Putative, expressed	anthranilate phosphoribosyltransferase, Putative, expressed	Hypothetical protein.	TCCCCC	TCCCCCC	0.020301	0.11721	5.77361	28.9836
A2J10_04T0114500.1	Conserved hypothetical protein	#N/A	#N/A	TCCCC	TCCCCC	0.536306	3.31024	6.17229	32.5073
A2J10_05T0110700.1	saposin-like type B, region 1 family protein, Putative, expressed	#N/A	#N/A	AAT	AATAT	0.277845	1.85429	6.67384	30.4183
A2J10_04T0146100.1	transferase family protein, Putative, expressed	transferase family protein, Putative, expressed	Similar to Hydroxyanthranilate hydroxycinnamoyltransferase 3.	GCCCCC	GCCCCCC	6.84347	51.5398	7.53123	62
A2J10_01T0471000.1	Conserved hypothetical protein	#N/A	#N/A	CTTTTTT	CTTTTTTT	0.098036	1.02421	10.4473	42.1032
A2J10_03T0118700.1	WRKY55, expressed	#N/A	#N/A	GAAA	GA	0.16773	1.94044	11.5688	40.4148
A2J10_03T0040800.1	aminotransferase, Putative, expressed	aminotransferase, Putative, expressed	Phosphoserine aminotransferase, chloroplast precursor (EC 2.6.1.52) (PSAT).	GC	G	0.205576	2.48453	12.0857	20.4535
A2J10_11T0070200.1	sucrose-phosphate synthase, Putative, expressed	sucrose-phosphate synthase, Putative, expressed	Similar to Sucrose-phosphate synthase.	AATATATATATATATATATATATAT	AATATATATATATATATATATATATAT	0.367522	4.65377	12.6626	24.4299
A2J10_02T0327300.1	expressed protein	#N/A	#N/A	GGCG	GG	0.040516	0.771428	19.0401	40.4148
A2J10_06T0139600.1	DNA-directed RNA polymerase subunit beta, Putative, expressed	DNA-directed RNA polymerase subunit beta, Putative, expressed	#N/A	TCC	TC	12.1189	234.326	19.3356	196
A2J10_01T0028600.1	serine/threonine-protein kinase At1g18390 precursor, Putative, expressed	#N/A	#N/A	GAAAAAAAA	GAAAAAAAAA	0.037235	0.92909	24.9521	27.8391
A2J10_01T0483100.1	Ser/Thr protein phosphatase family protein, Putative, expressed	#N/A	#N/A	ACC	ACCC	0.014785	0.647159	43.7713	41.3123
A2J10_11T0098400.1	expressed protein	#N/A	#N/A	CAAAAAA	CAAAAAAA	0.001567	0.475281	303.306	24.9853
A2J10_01T0120800.1	argonaute, Putative, expressed	argonaute, Putative, expressed	Similar to Protein argonaute 15.	ACCCCC	ACCCCCC	0	0.107891	#DIV/0!	45.1726
A2J10_10T0181700.5	autophagy-related protein 3, Putative, expressed	#N/A	#N/A	GCCCCC	GCCCCCC	0	0.12366	#DIV/0!	39.9706
A2J10_11T0121700.1	Conserved hypothetical protein	#N/A	#N/A	GCTCT	GCT	0	0.136355	#DIV/0!	22.4391
A2J10_09T0176300.1	bromodomain protein 103, Putative, expressed	#N/A	#N/A	CCTCTCTCTCTCTCTCTCTCTCTC	CCTCTCTCTCTCTCTCTCTC	0	0.142919	#DIV/0!	30.4183
A2J10_04T0234900.1	Conserved hypothetical protein	#N/A	#N/A	ATTT	ATTTT	0	0.157074	#DIV/0!	23.2977
A2J10_08T0203600.2	calcium-transporting ATPase, plasma membrane-type, Putative, expressed	#N/A	#N/A	CGAGAGAGAGAGAGAGAGAGAGAGAGAGAGAGA	CGAGAGAGAGAGAGAGAGAGAGAGAGAGA	0	0.169868	#DIV/0!	90
A2J10_06T0114900.1	cadmium tolerance factor, Putative, expressed	#N/A	#N/A	GCCCCC	GCCCCCC	0	0.186758	#DIV/0!	55
A2J10_01T0407000.1	bet v I allergen family protein, Putative, expressed	bet v I allergen family protein, Putative, expressed	Similar to AT-rich element binding factor 3.	TTCATCA	TTCA	0	0.23133	#DIV/0!	28.2931
A2J10_02T0254300.1	expressed protein	expressed protein	Phospholipid methyltransferase family protein.	ACT	A	0	0.245614	#DIV/0!	25.4267
A2J10_11T0042000.3	receptor protein kinase CLAVATA1 precursor, Putative, expressed	receptor protein kinase CLAVATA1 precursor, Putative, expressed	#N/A	CATAT	CAT	0	0.261063	#DIV/0!	58
A2J10_04T0164400.1	Putative expressed protein	#N/A	#N/A	AGTG	AG	0	0.461885	#DIV/0!	23.434
A2J10_02T0380500.2	tyrosine protein kinase domain containing protein, Putative, expressed	#N/A	#N/A	GAAAA	GAAAAA	0	1.03872	#DIV/0!	20.6747
A2J10_06T0294300.1	ras-related protein, Putative, expressed	ras-related protein, Putative, expressed	Small G protein, Negative regulation of brassinosteroid signaling	ATGTG	ATG	0	1.5417	#DIV/0!	22.4391
A2J10_10T0048400.1	ZOS4-02 - C2H2 zinc finger protein, expressed	#N/A	Similar to EMF protein.	AAGA	AA	0	1.71892	#DIV/0!	23.434
A2J10_01T0199300.1	Conserved hypothetical protein	Conserved hypothetical protein	#N/A	TC	TCC	0	13.7635	#DIV/0!	92
A2J10_09T0035500.1	mitochondrial 60S ribosomal protein L5, Putative, expressed	mitochondrial 60S ribosomal protein L5, Putative, expressed	#N/A	TG	TGG	0	40.3932	#DIV/0!	127
A2J10_09T0035500.1	mitochondrial 60S ribosomal protein L5, Putative, expressed	mitochondrial 60S ribosomal protein L5, Putative, expressed	#N/A	C	CG	0	40.3932	#DIV/0!	68
A2J10_09T0035500.1	mitochondrial 60S ribosomal protein L5, Putative, expressed	mitochondrial 60S ribosomal protein L5, Putative, expressed	#N/A	T	TG	0	40.3932	#DIV/0!	42.9851
A2J10_10T0080800.1	Conserved hypothetical protein	#N/A	#N/A	TGGGG	TGGGGG	0	48.3278	#DIV/0!	39.9167

## Sheet: Total_SNPs_InDels
Chromosome Number	Number of SNPs	Number of InDels
1	187	11
2	117	11
3	138	9
4	115	15
5	100	14
6	146	13
7	85	5
8	78	4
9	157	10
10	52	9
11	82	6
12	86	5

## Sheet: Supp_4
	Total SNP			A/C	A/G	A/T	C/A	C/G	C/T	G/A	G/C	G/T	T/A	T/C	T/G
A/C	42		Total SNP	42	214	67	80	55	186	186	257	105	53	257	49
A/G	214
A/T	67
C/A	80
C/G	55
C/T	186
G/A	186
G/C	257
G/T	105
T/A	53
T/C	257
T/G	49
