# Supplementary material for: RNA-Seq, co-expression network and eQTL analysis identify key genes for chlorophyll and carbon metabolism in rice
Source: Research Square preprint supplement (doi:10.21203/rs.3.rs-2517802/v1), 2023-02-08
Supplement: Supplementary file 6 [file 3fbb4435ce0ba93518a50cac.xlsx]

## Sheet: Up
Table s10. List of transcription factors.
TF	Family		Family
LOC_Os01g06640.1	bHLH		bHLH
LOC_Os01g38610.1	bHLH		bZIP
LOC_Os01g39330.1	bHLH		C3H
LOC_Os04g41229.1	bHLH		CO-like
LOC_Os09g28210.1	bHLH		ERF
LOC_Os10g23050.1	bHLH		G2-like
LOC_Os11g38870.1	bHLH		HB-other
LOC_Os06g45140.1	bZIP		HD-ZIP
LOC_Os05g45020.1	C3H		HSF
LOC_Os06g15330.1	CO-like		LBD
LOC_Os03g08470.1	ERF		MYB
LOC_Os03g08490.1	ERF		NAC
LOC_Os03g08500.2	ERF		RAV
LOC_Os06g07030.1	ERF		WRKY
LOC_Os07g42510.1	ERF
LOC_Os09g11460.1	ERF
LOC_Os09g11480.2	ERF
LOC_Os10g41330.1	ERF
LOC_Os12g01490.1	G2-like
LOC_Os03g55990.1	HB-other
LOC_Os02g43330.1	HD-ZIP
LOC_Os09g28354.1	HSF
LOC_Os07g40000.1	LBD
LOC_Os03g20090.1	MYB
LOC_Os08g43550.1	MYB
LOC_Os11g45740.1	MYB
LOC_Os01g60020.1	NAC
LOC_Os03g60080.1	NAC
LOC_Os04g52810.1	NAC
LOC_Os07g48450.1	NAC
LOC_Os07g48550.1	NAC
LOC_Os11g03300.1	NAC
LOC_Os11g03370.1	NAC
LOC_Os12g03040.1	NAC
LOC_Os12g29330.1	NAC
LOC_Os12g41680.1	NAC
LOC_Os01g04750.1	RAV
LOC_Os01g04800.1	RAV
LOC_Os01g09100.1	WRKY
LOC_Os01g18584.1	WRKY
LOC_Os01g61080.1	WRKY
LOC_Os03g55164.1	WRKY
LOC_Os05g09020.1	WRKY
LOC_Os05g25770.1	WRKY
LOC_Os05g39720.1	WRKY
LOC_Os05g46020.1	WRKY
LOC_Os11g29870.1	WRKY

## Sheet: Down
Table s10. List of transcription factors.
LOC_Os01g13540.1	Nin-like		Nin-like
LOC_Os01g70310.2	bHLH		bHLH
LOC_Os01g72370.1	bHLH		G2-like
LOC_Os03g26210.1	bHLH		GRAS
LOC_Os06g49040.1	G2-like		MYB_related
LOC_Os01g62460.1	GRAS		NAC
LOC_Os10g41260.1	MYB_related		NF-YA
LOC_Os02g36880.2	NAC		Nin-like
LOC_Os12g42400.2	NF-YA		TALE
LOC_Os09g37710.2	Nin-like		WRKY
LOC_Os03g52239.1	TALE
LOC_Os11g02520.1	WRKY

## Sheet: Sheet3
bHLH	10
bZIP	1
C3H	1
CO-like	1
ERF	8
G2-like	2
GRAS	1
HB-other	1
HD-ZIP	1
HSF	1
LBD	1
MYB	3
MYB_related	1
NAC	11
NF-YA	1
Nin-like	2
RAV	2
TALE	1
WRKY	10

## Sheet: Figure_8
Table s10. List of transcription factors.
bHLH	bZIP	C3H	CO-like	ERF	G2-like	GRAS	HB-other	HD-ZIP	HSF	LBD	MYB	MYB_related	NAC	NF-YA	Nin-like	RAV	TALE	WRKY
10	1	1	1	8	2	1	1	1	1	1	3	1	11	1	2	2	1	10
