# Supplementary material for: RNA-Seq, co-expression network and eQTL analysis identify key genes for chlorophyll and carbon metabolism in rice
Source: Research Square preprint supplement (doi:10.21203/rs.3.rs-2517802/v1), 2023-02-08
Supplement: Supplementary file 7 [file 5a8a012a360d3395be5ff0ef.xlsx]

## Sheet: DEG
Gene	log2(fold_change)	Description (phytozome)
LOC_Os04g59200	5.97869	peroxidase precursor, putative, expressed
LOC_Os07g35560	4.22847	glucan endo-1,3-beta-glucosidase precursor
LOC_Os01g14410	4.12968	early light-induced protein, chloroplast precursor
LOC_Os10g40934	3.54409	flavonol synthase/flavanone 3-hydroxylase
LOC_Os10g21396	-2.02321	NADPH-dependent oxidoreductase
LOC_Os02g48770	-3.16663	SAM dependent carboxyl methyltransferase
LOC_Os06g05130	-3.50817	myristoyl-acyl carrier protein thioesterase, chloroplast precursor
LOC_Os03g48030	-5.11205	integral membrane HPP family protein
LOC_Os03g50885	Control	Actin

## Sheet: Primer
Gene	Forward	Reverse
LOC_Os04g59200	GACAACGCCTACTACATCGC	TACCTTGCTGAGCTTGACCA
LOC_Os07g35560	CGAGAATTTGAAGGGCGGAG	TCCCAACTGCTGAATTTGCC
LOC_Os01g14410	GAGCCGACGAAGGAGGAG	CGACACGAACCCCACCAT
LOC_Os10g40934	CTGCATCTTTCAGGCGATCC	TGCCCATCACCTTGTCAGAT
LOC_Os10g21396	AGCATTGGACCGTCTATAGCA	CAGCTCGTAGACCACCTGAA
LOC_Os02g48770	TTCTTCCTCAACGACCTCCC	GAGGAGTGGAAGAGGTGGAC
LOC_Os06g05130	TACAAGCCCAGACAAGGAGG	TTTTGCCTAAACACCAGCCC
LOC_Os03g48030	GCTGGGAAGGATGGATCAGA	AAATGCCGCACAACCAATCT
Actin_LOC_Os03g50885	GTCCTCTTCCAGCCTTCCTT	CTCATCCTGTCAGCAATGCC

## Sheet: Oligos
Table s11. Primers list for q-PCR.
S.No.	Gene	Oligos
R1F	LOC_Os04g59200	GACAACGCCTACTACATCGC
R1R		TACCTTGCTGAGCTTGACCA
R2F	LOC_Os07g35560	CGAGAATTTGAAGGGCGGAG
R2R		TCCCAACTGCTGAATTTGCC
R3F	LOC_Os01g14410	GAGCCGACGAAGGAGGAG
R3R		CGACACGAACCCCACCAT
R4F	LOC_Os10g40934	CTGCATCTTTCAGGCGATCC
R4R		TGCCCATCACCTTGTCAGAT
R5F	LOC_Os10g21396	AGCATTGGACCGTCTATAGCA
R5R		CAGCTCGTAGACCACCTGAA
R6F	LOC_Os02g48770	TTCTTCCTCAACGACCTCCC
R6R		GAGGAGTGGAAGAGGTGGAC
R7F	LOC_Os06g05130	TACAAGCCCAGACAAGGAGG
R7R		TTTTGCCTAAACACCAGCCC
R8F	LOC_Os03g48030	GCTGGGAAGGATGGATCAGA
R8R		AAATGCCGCACAACCAATCT
Actin_F	LOC_Os03g50885	GTCCTCTTCCAGCCTTCCTT
Actin_R		CTCATCCTGTCAGCAATGCC

## Sheet: RT
Gene of interest R1
Sample	CT (Target)	CT (Ref)	ΔCT=CT (Target) - CT (Ref)	Average of Control ΔCT	ΔΔCT = (ExpΔCT - ConΔCT)	2^(-ddCt)	Log2 fold Change	R1	M-507
N22_1	28.06	31.96	-3.9					Avg.	5.42
N22_2	28.62	30.64	-2.02					SD	0.619435
N22_3	26.83	30.42	-3.59					SEM	0.357631
M-507_1	29.31	30.85	-1.54	3.17	-4.71	26.1729	4.71
M-507_2	28.24	30.77	-2.53	3.17	-5.7	51.9842	5.7
M-507_3	28.32	31	-2.68	3.17	-5.85	57.68	5.85
Gene of interest R2
Sample	CT (Target)	CT (Ref)	ΔCT=CT (Target) - CT (Ref)	Average of Control ΔCT	ΔΔCT = (ExpΔCT - ConΔCT)	2^(-ddCt)	Log2 fold Change	R2	M-507
N22_1	28.06	31.96	-3.9					Avg.	4.21
N22_2	28.62	30.64	-2.02					SD	1.05219
N22_3	26.83	30.42	-3.59					SEM	0.607481
M-507_1	29.46	31.01	-1.55	3.17	-4.72	26.3549	4.72
M-507_2	29.63	31.37	-1.74	3.17	-4.91	30.0647	4.91
M-507_3	31.5	31.33	0.17	3.17	-3	8	3
Gene of interest R3
Sample	CT (Target)	CT (Ref)	ΔCT=CT (Target) - CT (Ref)	Average of Control ΔCT	ΔΔCT = (ExpΔCT - ConΔCT)	2^(-ddCt)	Log2 fold Change	R3	M-507
N22_1	28.8	21.59	7.21					Avg.	1.43
N22_2	26.51	23.45	3.06					SD	1.04978
N22_3	25.99	22.02	3.97					SEM	0.606089
M-507_1	26.83	22.81	4.02	4.74667	-0.726667	1.65481	0.726667
M-507_2	25.7	21.88	3.82	4.74667	-0.926667	1.90088	0.926667
M-507_3	24.88	22.77	2.11	4.74667	-2.63667	6.21893	2.63667
Gene of interest R4
Sample	CT (Target)	CT (Ref)	ΔCT=CT (Target) - CT (Ref)	Average of Control ΔCT	ΔΔCT = (ExpΔCT - ConΔCT)	2^(-ddCt)	Log2 fold Change	R4	M-507
N22_1	27.79	20.83	6.96					Avg.	0.996667
N22_2	26.88	21.18	5.7					SD	0.135031
N22_3	26.45	21.2	5.25					SEM	0.0779601
M-507_1	26.73	21.89	4.84	5.97	-1.13	2.18859	1.13
M-507_2	26.68	21.71	4.97	5.97	-1	2	1
M-507_3	27.08	21.97	5.11	5.97	-0.86	1.81504	0.86
Gene of interest R5
Sample	CT (Target)	CT (Ref)	ΔCT=CT (Target) - CT (Ref)	Average of Control ΔCT	ΔΔCT = (ExpΔCT - ConΔCT)	2^(-ddCt)	Log2 fold Change	R5	M-507
N22_1	32.06	31.96	0.1					Avg.	-1.27
N22_2	32.28	30.64	1.64					SD	0.68942
N22_3	31.38	30.42	0.96					SEM	0.398037
M-507_1	32.62	31.01	1.61	0.9	0.71	0.61132	-0.71
M-507_2	33.33	31.37	1.96	0.9	1.06	0.479632	-1.06
M-507_3	34.27	31.33	2.94	0.9	2.04	0.243164	-2.04
Gene of interest R6
Sample	CT (Target)	CT (Ref)	ΔCT=CT (Target) - CT (Ref)	Average of Control ΔCT	ΔΔCT = (ExpΔCT - ConΔCT)	2^(-ddCt)	Log2 fold Change	R6	M-507
N22_1	24.57	20.83	3.74					Avg.	-1.41667
N22_2	23.41	21.18	2.23					SD	0.034641
N22_3	23.94	21.2	2.74					SEM	0.02
M-507_1	26.23	21.89	4.34	2.90333	1.43667	0.36942	-1.43667
M-507_2	25.99	21.71	4.28	2.90333	1.37667	0.385108	-1.37667
M-507_3	26.31	21.97	4.34	2.90333	1.43667	0.36942	-1.43667
Gene of interest R7
Sample	CT (Target)	CT (Ref)	ΔCT=CT (Target) - CT (Ref)	Average of Control ΔCT	ΔΔCT = (ExpΔCT - ConΔCT)	2^(-ddCt)	Log2 fold Change	R7	M-507
N22_1	22.65	21.59	1.06					Avg.	-1.77333
N22_2	22.33	23.45	-1.12					SD	0.226789
N22_3	22.51	22.02	0.49					SEM	0.130937
M-507_1	24.81	22.81	2	0.143333	1.85667	0.276114	-1.85667
M-507_2	23.97	21.88	2.09	0.143333	1.94667	0.259415	-1.94667
M-507_3	24.43	22.77	1.66	0.143333	1.51667	0.349492	-1.51667
Gene of interest R8
Sample	CT (Target)	CT (Ref)	ΔCT=CT (Target) - CT (Ref)	Average of Control ΔCT	ΔΔCT = (ExpΔCT - ConΔCT)	2^(-ddCt)	Log2 fold Change	R8	M-507
N22_1	22.65	21.59	1.06					Avg.	-1.87333
N22_2	22.33	23.45	-1.12					SD	0.890019
N22_3	22.51	22.02	0.49					SEM	0.513853
M-507_1	23.95	21.94	2.01	0.143333	1.86667	0.274206	-1.86667
M-507_2	23.04	21.91	1.13	0.143333	0.986667	0.504642	-0.986667
M-507_3	24.68	21.77	2.91	0.143333	2.76667	0.146943	-2.76667

## Sheet: Figure_10
Up-regulated genes
R1	LOC_Os04g59200	5.97869		R1	M-507		R2	M-507		R3	M-507		R4	M-507
R2	LOC_Os07g35560	4.22847		Avg.	5.42		Avg.	4.21		Avg.	1.43		Avg.	0.996667
R3	LOC_Os01g14410	4.12968		SD	0.619435		SD	1.05219		SD	1.04978		SD	0.135031
R4	LOC_Os10g40934	3.54409		SEM	0.357631		SEM	0.607481		SEM	0.606089		SEM	0.0779601
Down-regulated genes
R5	LOC_Os10g21396	-2.02321		R5	M-507		R6	M-507		R7	M-507		R8	M-507
R6	LOC_Os02g48770	-3.16663		Avg.	-1.27		Avg.	-1.41667		Avg.	-1.77333		Avg.	-1.87333
R7	LOC_Os06g05130	-3.50817		SD	0.68942		SD	0.034641		SD	0.226789		SD	0.890019
R8	LOC_Os03g48030	-5.11205		SEM	0.398037		SEM	0.02		SEM	0.130937		SEM	0.513853
	LOC_Os04g59200	5.42
	LOC_Os07g35560	4.21
	LOC_Os01g14410	1.43
	LOC_Os10g40934	0.996667
	LOC_Os10g21396	-1.27
	LOC_Os02g48770	-1.41667
	LOC_Os06g05130	-1.77333
	LOC_Os03g48030	-1.87333

## Sheet: Sheet1
LOC_Os01g14410	1.43		LOC_Os01g14410	LOC_Os02g48770	LOC_Os03g48030	LOC_Os04g59200	LOC_Os06g05130	LOC_Os07g35560	LOC_Os10g21396	LOC_Os10g40934
LOC_Os02g48770	-1.41667		1.43	-1.41667	-1.87333	5.42	-1.77333	4.21	-1.27	0.996667
LOC_Os03g48030	-1.87333
LOC_Os04g59200	5.42
LOC_Os06g05130	-1.77333
LOC_Os07g35560	4.21
LOC_Os10g21396	-1.27
LOC_Os10g40934	0.996667
