# Supplementary material for: RNA-Seq, co-expression network and eQTL analysis identify key genes for chlorophyll and carbon metabolism in rice
Source: Research Square preprint supplement (doi:10.21203/rs.3.rs-2517802/v1), 2023-02-08
Supplement: Supplementary file 8 [file 9045126b3c1c7b3c85436964.xlsx]

## Sheet: Heatmap_up
Table s4. (a) List of differential up-regulated DEGs in N22 vs. M-507.
gene	log2(fold_change)
XLOC_005263	3.86569
LOC_Os01g03390	2.69291
LOC_Os01g04550	3.84761
LOC_Os01g04750,LOC_Os01g04770,LOC_Os01g04800	4.59573
LOC_Os01g12710	2.60432
LOC_Os01g14410	4.12968
LOC_Os01g15000	2.96151
LOC_Os01g18670	2.75747
LOC_Os01g37350	3.02688
LOC_Os01g42410	2.76601
LOC_Os01g47070	3.19091
LOC_Os01g51570	4.59357
LOC_Os01g57073	2.69531
LOC_Os01g71340	4.71998
LOC_Os01g73170	4.57583
LOC_Os02g02400	3.12125
LOC_Os02g08100	3.10435
LOC_Os02g39850	3.06037
LOC_Os02g40784	3.31225
LOC_Os02g41630	2.58124
LOC_Os02g44980	2.76568
LOC_Os02g46850,LOC_Os02g46860	3.89036
LOC_Os02g54980	2.63057
LOC_Os03g05620	3.1858
LOC_Os03g10620	2.63963
LOC_Os03g12890	4.09109
LOC_Os03g16950	4.5712
LOC_Os03g17690	3.04823
LOC_Os03g18130	4.9217
LOC_Os03g22790	2.27056
LOC_Os03g49440	3.60077
LOC_Os04g16820	3.30877
LOC_Os04g30240	3.80981
LOC_Os04g30250	3.32294
LOC_Os04g32110	3.13988
LOC_Os04g39320	3.46038
LOC_Os04g39350	3.06676
LOC_Os04g40630	4.50704
LOC_Os04g41229	3.29889
LOC_Os04g49370	3.36046
LOC_Os04g59150	5.05326
LOC_Os04g59200	5.97869
LOC_Os05g05680	3.26909
LOC_Os05g07940	4.16855
LOC_Os05g08420	3.16515
LOC_Os05g27780	3.23903
LOC_Os05g28740	2.63232
LOC_Os06g02540	2.70431
LOC_Os06g07600	3.73125
LOC_Os06g22919	3.57417
LOC_Os06g36560	2.61876
LOC_Os06g39712	2.69936
LOC_Os06g39752	3.03066
LOC_Os06g45140	3.80032
LOC_Os07g06850	3.59518
LOC_Os07g08150	2.82223
LOC_Os07g35370	3.71902
LOC_Os07g35560	4.22847
LOC_Os07g42510	3.23953
LOC_Os07g46852	4.03647
LOC_Os07g48020	4.39717
LOC_Os07g48450	3.76337
LOC_Os08g10310,LOC_Os08g10320	3.35515
LOC_Os08g15306	3.14361
LOC_Os08g15780	4.30152
LOC_Os08g26230	3.17933
LOC_Os08g30510	3.37838
LOC_Os08g37670	3.95399
LOC_Os09g17560	2.95592
LOC_Os09g18159	3.2283
LOC_Os09g31478	3.32264
LOC_Os10g21272	3.17684
LOC_Os10g21418	2.58653
LOC_Os10g31850	3.22294
LOC_Os10g39680,LOC_Os10g39700	4.25922
LOC_Os10g40934	3.54409
LOC_Os11g12340	2.50764
LOC_Os11g15040	3.2135
LOC_Os11g32500	3.09049
LOC_Os12g24020	3.33837
LOC_Os12g33130	2.70214
LOC_Os12g36110	2.61936

## Sheet: Annotation_up
Table s4. (a) List of differential up-regulated DEGs in N22 vs. M-507.
description(phytozome)	log2(fold_change)
Unknown	3.86569
BBTI7 bran trypsin inhibitor	2.69291
expressed protein	3.84761
B3 DNA binding domain containing protein	4.59573
short chain dehydrogenase/reductase	2.60432
early light-induced protein	4.12968
lipase	2.96151
MDR-like ABC transporter	2.75747
Unknown	3.02688
pleiotropic drug resistance protein	2.76601
glycosyl hydrolase	3.19091
glycosyl hydrolases family 17	4.59357
insulin-degrading enzyme	2.69531
glycosyl hydrolases family 17	4.71998
peroxidase precursor	4.57583
catalase isozyme A	3.12125
AMP-binding domain containing protein	3.10435
transferase family protein	3.06037
WAX2	3.31225
phenylalanine ammonia-lyase	2.58124
amino acid transporter protein	2.76568
oligopeptide transporter	3.89036
pheophorbide a oxygenase	2.63057
inorganic phosphate transporter	3.1858
hydrolase, alpha/beta fold family domain containing protein	2.63963
aminotransferase domain containing protein	4.09109
cysteine-rich repeat secretory protein 55 precursor	4.5712
OsAPx1 - Cytosolic Ascorbate Peroxidase encoding gene 1-8	3.04823
asparagine synthetase	4.9217
beta-amylase	2.27056
phosphatase	3.60077
DNA-directed RNA polymerase subunit beta	3.30877
OsWAK60 - OsWAK receptor-like protein kinase	3.80981
wall-associated receptor kinase-like 5 precursor	3.32294
ACT domain containing protein	3.13988
expressed protein	3.46038
heavy metal associated domain containing protein	3.06676
BTBZ4 and Calmodulin-binding domains	4.50704
bHLH protein	3.29889
expressed protein	3.36046
peroxidase precursor	5.05326
peroxidase precursor	5.97869
1-aminocyclopropane-1-carboxylate oxidase	3.26909
glyoxalase family protein	4.16855
expressed protein	3.16515
expressed protein	3.23903
universal stress protein	2.63232
expressed protein	2.70431
uncharacterized glycosyltransferase	3.73125
DEFL9 - Defensin and Defensin-like DEFL family	3.57417
inositol oxygenase	2.61876
OsClp10 - Putative Clp protease homologue	2.69936
expressed protein	3.03066
bZIP transcription factor protein	3.80032
gibberellin receptor GID1L2	3.59518
early light-induced protein	2.82223
DUF26 kinases	3.71902
glucan endo-1,3-beta-glucosidase precursor	4.22847
AP2 domain containing protein	3.23953
sex determination protein tasselseed-2	4.03647
peroxidase precursor	4.39717
no apical meristem protein	3.76337
SHR5-receptor-like kinase	3.35515
chloroplast 50S ribosomal protein L20	3.14361
DC1 domain	4.30152
expressed protein	3.17933
expressed protein	3.37838
plastocyanin-like domain containing protein	3.95399
O-methyltransferase	2.95592
light repressible receptor protein kinase	3.2283
auxin efflux carrier component	3.32264
expressed protein	3.17684
NADPH-dependent oxidoreductase	2.58653
RING finger and CHY zinc finger protein	3.22294
CHIT14 - Chitinase family protein precursor	4.25922
flavonol synthase/flavanone 3-hydroxylase	3.54409
disease resistance protein RPM1	2.50764
SAM carboxyl methyltransferase	3.2135
rubredoxin family protein	3.09049
rhodanese-like domain containing protein	3.33837
expressed protein	2.70214
calmodulin binding protein	2.61936

## Sheet: Heatmap_down
Table s4. (b) List of differential down-regulated DEGs in N22 vs. M-507.
gene	log2(fold_change)
LOC_Os01g50070,LOC_Os01g50080	-3.45704
LOC_Os03g48030	-5.11205
LOC_Os07g04980,LOC_Os07g04990	-4.95463
LOC_Os05g06920	-4.68127
LOC_Os03g02750	-4.42579
LOC_Os04g15920	-4.2896
LOC_Os08g31630	-4.19644
LOC_Os09g09930	-4.10094
LOC_Os05g12630,LOC_Os05g12640	-4.06925
LOC_Os04g34610	-4.06467
LOC_Os04g12499,LOC_Os04g12530	-3.90443
LOC_Os09g12290	-3.74381
LOC_Os03g44740	-3.70148
LOC_Os07g09190	-3.67116
LOC_Os08g04500	-3.60057
LOC_Os09g04360	-3.52971
LOC_Os06g05130	-3.50817
LOC_Os05g02070	-3.40866
LOC_Os07g34260	-3.33831
LOC_Os02g48770	-3.16663
LOC_Os05g11320	-3.03961
LOC_Os12g25490	-2.80642
LOC_Os02g02930	-2.75637
LOC_Os04g33460	-2.72336
LOC_Os05g24650	-2.72097
LOC_Os02g27490	-2.71441
LOC_Os04g18090	-2.69084
LOC_Os07g46920	-2.66786
LOC_Os12g03899	-2.594
LOC_Os12g01360	-2.57282
LOC_Os10g36000	-2.54194
LOC_Os11g01330	-2.50897
LOC_Os09g02270	-2.5055
LOC_Os03g26210	-2.46343

## Sheet: Annotation_down
Table s4. (b) List of differential down-regulated DEGs in N22 vs. M-507.
description(phytozome)	log2(fold_change)
multidrug resistance protein 1, putative, expressed	-3.45704
integral membrane HPP family protein, putative, expressed	-5.11205
expressed protein	-4.95463
relA-SpoT like protein RSH4, putative, expressed	-4.68127
OsSub25 - Putative Subtilisin homologue, expressed	-4.42579
dehydrogenase, putative, expressed	-4.2896
uncharacterized glycosyl hydrolase Rv2006/MT2062, putative, expressed	-4.19644
heavy metal transport/detoxification protein, putative, expressed	-4.10094
expressed protein	-4.06925
expressed protein	-4.06467
amino acid transporter protein, putative, expressed	-3.90443
bifunctional aspartokinase/homoserine dehydrogenase, chloroplast precursor, putative, expressed	-3.74381
cytochrome P450, putative, expressed	-3.70148
transketolase, putative, expressed	-3.67116
terpene synthase, putative, expressed	-3.60057
expressed protein	-3.52971
myristoyl-acyl carrier protein thioesterase, chloroplast precursor, putative, expressed	-3.50817
expressed protein	-3.40866
chalcone and stilbene synthases, putative, expressed	-3.33831
SAM dependent carboxyl methyltransferase, putative, expressed	-3.16663
metallothionein-like protein 3B, putative, expressed	-3.03961
O-methyltransferase, putative, expressed	-2.80642
terpene synthase, putative, expressed	-2.75637
1,4-alpha-glucan-branching enzyme 2, chloroplast precursor, putative, expressed	-2.72336
DUF567 domain containing protein, putative, expressed	-2.72097
bile acid sodium symporter family protein, putative, expressed	-2.71441
histone H1, putative, expressed	-2.69084
sex determination protein tasselseed-2, putative, expressed	-2.66786
major facilitator superfamily antiporter, putative, expressed	-2.594
expressed protein	-2.57282
remorin C-terminal domain containing protein, putative, expressed	-2.54194
expressed protein	-2.50897
cyclase family protein, putative, expressed	-2.5055
helix-loop-helix DNA-binding domain containing protein, expressed	-2.46343
