# Supplementary material for: RNA-Seq, co-expression network and eQTL analysis identify key genes for chlorophyll and carbon metabolism in rice
Source: Research Square preprint supplement (doi:10.21203/rs.3.rs-2517802/v1), 2023-02-08
Supplement: Supplementary file 9 [file cded9c4776ade11ae5a1eaf5.xlsx]

## Sheet: Figure_13
		Table s8. List of genes in co-expression network.
s.n.	row	column	cor	p			gene_id		gene_id	N22	K	irgsp
1	Os5690	Os24250	-0.922044	0.00887873		Os1	MSTRG.25604.1		MSTRG.25604.1	#N/A	resistance protein, Putative, expressed	Rice blast resistance protein Pib homologue
2	Os5690	Os24337	-0.920394	0.00925342		Os2	MSTRG.17508.2		MSTRG.7599.1	#N/A	maturase K, Putative, expressed	Similar to photosystem II protein D1.
3	Os5690	Os30797	-0.920223	0.00929262		Os3	A2J10_12T0081200.4		MSTRG.19954.6	#N/A	#N/A	#N/A
4	Os5690	Os38830	-0.918465	0.00970096		Os4	MSTRG.12450.6		A2J10_03T0344400.2	Putative expressed protein	#N/A	#N/A
5	Os5690	Os20729	-0.918245	0.00975271		Os5	MSTRG.26900.5		MSTRG.15036.3	#N/A	#N/A	#N/A
6	Os1129	Os18173	1	0		Os6	A2J10_09T0194200.3		MSTRG.21838.10	#N/A	#N/A	#N/A
7	Os1129	Os22148	1	0		Os7	A2J10_02T0272100.1		A2J10_06T0073600.1	galactosyltransferase family protein, Putative, expressed	galactosyltransferase family protein, Putative, expressed	Glycosyl transferase, family 31 protein.
8	Os1129	Os37817	1	0		Os8	A2J10_07T0273400.1		A2J10_08T0141900.1	FAD dependent oxidoreductase, Putative, expressed	FAD dependent oxidoreductase, Putative, expressed	Similar to CM0545.530.nc protein (Fragment).
9	Os1129	Os39417	1	0		Os9	A2J10_01T0413800.1		MSTRG.17508.2	#N/A	#N/A	#N/A
10	Os1129	Os7624	1	2.22e-16		Os10	A2J10_06T0086900.1		A2J10_12T0081200.4	Conserved hypothetical protein	#N/A	#N/A
11	Os1129	Os41017	1	2.22e-16		Os11	A2J10_02T0221800.1		A2J10_10T0053700.1	Hypothetical protein	#N/A	#N/A
12	Os1129	Os40605	1	6.66e-16		Os12	A2J10_04T0241400.1		MSTRG.12450.6	#N/A	#N/A	#N/A
13	Os1129	Os31718	1	8.88e-16		Os13	A2J10_02T0220800.1		MSTRG.3486.4	#N/A	#N/A	#N/A
14	Os1129	Os39334	1	8.88e-16		Os14	MSTRG.26287.5		A2J10_05T0091200.2	Putative expressed protein	#N/A	#N/A
15	Os1129	Os37493	1	8.88e-16		Os15	A2J10_05T0261200.1		A2J10_06T0139800.1	OsClp10 - Putative Clp protease homologue, expressed	#N/A	#N/A
16	Os1129	Os43539	1	8.88e-16		Os16	A2J10_07T0239800.1		A2J10_01T0187900.3	Putative expressed protein	#N/A	#N/A
17	Os1129	Os42919	1	8.88e-16		Os17	MSTRG.2065.1		A2J10_06T0150500.6	Conserved hypothetical protein	#N/A	#N/A
18	Os1129	Os37266	1	8.88e-16		Os18	A2J10_02T0322800.1		MSTRG.803.6	#N/A	#N/A	#N/A
19	Os1129	Os25664	1	8.88e-16		Os19	A2J10_03T0269600.2		A2J10_07T0077300.2	mRNA-decapping enzyme, Putative, expressed	#N/A	#N/A
20	Os1129	Os31836	1	8.88e-16		Os20	A2J10_03T0388300.1		MSTRG.5667.9	#N/A	#N/A	#N/A
21	Os1129	Os37226	1	8.88e-16		Os21	MSTRG.15375.3		MSTRG.26900.5	#N/A	#N/A	#N/A
22	Os1129	Os22154	1	8.88e-16		Os22	A2J10_05T0198700.1		A2J10_09T0194200.3	Putative expressed protein	#N/A	#N/A
23	Os1129	Os18122	1	1.11e-15		Os23	MSTRG.19459.2		MSTRG.26729.6	#N/A	#N/A	#N/A
24	Os1129	Os25956	1	1.11e-15		Os24	A2J10_12T0153300.1		A2J10_02T0272100.1	ferredoxin-thioredoxin reductase, variable chain, Putative, expressed	#N/A	#N/A
25	Os1129	Os38136	1	1.11e-15		Os25	A2J10_02T0272300.1		MSTRG.22398.12	#N/A	#N/A	#N/A
26	Os1129	Os37550	1	1.11e-15		Os26	MSTRG.11767.1		A2J10_06T0113200.1	cadmium tolerance factor, Putative, expressed	embryogenesis transmembrane protein, Putative, expressed	Conserved hypothetical protein.
27	Os1129	Os25837	1	1.11e-15		Os27	A2J10_10T0091300.1		MSTRG.637.13	#N/A	#N/A	#N/A
28	Os1129	Os43180	1	1.11e-15		Os28	A2J10_11T0034700.1		A2J10_07T0273400.1	Putative SNF2 family N-terminal domain containing protein, expressed	Putative SNF2 family N-terminal domain containing protein, expressed	Similar to chromatin remodeling complex subunit.
29	Os1129	Os31272	1	1.11e-15		Os29	A2J10_06T0245000.1		A2J10_01T0413800.1	ruvB-like, Putative, expressed	ruvB-like, Putative, expressed	Similar to Ruvbl1 protein.
30	Os1129	Os44183	1	1.11e-15		Os30	A2J10_09T0089400.6		MSTRG.22794.9	#N/A	#N/A	#N/A
31	Os1129	Os40046	1	1.11e-15		Os31	MSTRG.2747.1		MSTRG.743.4	#N/A	#N/A	#N/A
32	Os1129	Os43907	1	1.11e-15		Os32	A2J10_01T0295600.1		A2J10_05T0232400.1	starch synthase, Putative, expressed	starch synthase, Putative, expressed	Starch synthase, Starch biosynthesis
33	Os1129	Os43646	1	1.11e-15		Os33	MSTRG.1108.1		A2J10_03T0017400.1	retrotransposon protein, Putative, unclassified, expressed	#N/A	#N/A
34	Os1129	Os21651	1	1.11e-15		Os34	A2J10_10T0120700.1		MSTRG.22854.2	#N/A	#N/A	#N/A
35	Os1129	Os39131	1	1.11e-15		Os35	A2J10_02T0260100.1		A2J10_09T0021200.1	photosystem II 10 kDa polypeptide, chloroplast precursor, Putative, expressed	#N/A	#N/A
36	Os1129	Os43272	1	1.33e-15		Os36	A2J10_09T0178800.1		A2J10_06T0086900.1	potassium channel SKOR, Putative, expressed	#N/A	#N/A
37	Os1129	Os43149	1	1.33e-15		Os37	A2J10_02T0343900.1		A2J10_02T0221800.1	signal peptidase complex subunit 2, Putative, expressed	expressed protein	Hypothetical conserved gene.
38	Os1129	Os42872	1	1.33e-15		Os38	MSTRG.13745.2		MSTRG.21497.1	#N/A	#N/A	#N/A
39	Os1129	Os42558	1	1.33e-15		Os39	A2J10_01T0435600.2		MSTRG.3148.2	#N/A	#N/A	#N/A
40	Os1129	Os43454	1	1.33e-15		Os40	A2J10_07T0221500.1		A2J10_11T0187700.2	serine/threonine-protein kinase, Putative, expressed	#N/A	#N/A
41	Os1129	Os44097	1	1.33e-15		Os41	A2J10_02T0270000.1		MSTRG.22241.2	#N/A	#N/A	#N/A
42	Os1129	Os14155	1	1.33e-15		Os42	A2J10_09T0184200.1		MSTRG.25475.3	#N/A	#N/A	#N/A
43	Os1129	Os18179	1	1.33e-15		Os43	A2J10_05T0131500.1		A2J10_06T0145800.1	Putative expressed protein	#N/A	#N/A
44	Os1129	Os42572	1	1.33e-15		Os44	A2J10_01T0006100.1		MSTRG.17779.3	#N/A	#N/A	#N/A
45	Os1129	Os32645	1	1.33e-15		Os45	MSTRG.25510.3		A2J10_04T0241400.1	gamma-soluble NSF attachment protein, Putative, expressed	gamma-soluble NSF attachment protein, Putative, expressed	Similar to Gamma-SNAP (Fragment).
46	Os1129	Os11232	1	1.33e-15		Os46	A2J10_11T0002100.1		A2J10_02T0220800.1	expressed protein	#N/A	#N/A
47	Os1129	Os31673	1	1.33e-15		Os47	MSTRG.62.6		MSTRG.11856.5	#N/A	#N/A	#N/A
48	Os1129	Os16500	1	1.78e-15		Os48	A2J10_02T0292200.1		MSTRG.5803.6	#N/A	#N/A	#N/A
49	Os1129	Os42875	1	1.78e-15		Os49	A2J10_02T0207300.4		MSTRG.25211.1	#N/A	aquaporin protein, Putative, expressed	Major intrinsic protein family protein.
50	Os1129	Os32571	1	1.78e-15		Os50	MSTRG.1969.1		MSTRG.4316.6	#N/A	#N/A	#N/A
51	Os1129	Os24904	1	1.78e-15		Os51	A2J10_01T0470500.1		A2J10_05T0010500.1	cation efflux family protein, Putative, expressed	cation efflux family protein, Putative, expressed	Cation diffusion facilitator (CDF) family protein, Bivalent cation transporter, Translocation of Zn, Cd and other heavy metals, Ion homeostasis
52	Os1129	Os37802	1	1.78e-15		Os52	A2J10_01T0492500.1		MSTRG.26287.5	#N/A	#N/A	#N/A
53	Os1129	Os43267	1	1.78e-15		Os53	A2J10_04T0125900.1		A2J10_05T0261200.1	CTP synthase, Putative, expressed	#N/A	#N/A
54	Os1129	Os44107	1	2e-15		Os54	A2J10_03T0313000.3		A2J10_07T0239800.1	ring-H2 zinc finger protein, Putative, expressed	#N/A	#N/A
55	Os1129	Os13551	1	2.22e-15		Os55	A2J10_06T0138100.1		A2J10_10T0080500.1	Conserved hypothetical protein	#N/A	#N/A
56	Os1129	Os43737	1	2.22e-15		Os56	A2J10_12T0190400.1		MSTRG.5222.4	#N/A	#N/A	#N/A
57	Os1129	Os42140	1	2.22e-15		Os57	A2J10_02T0264000.3		MSTRG.25777.2	#N/A	#N/A	#N/A
58	Os1129	Os41335	1	2.22e-15		Os58	A2J10_07T0240700.1		MSTRG.2065.1	#N/A	#N/A	Conserved hypothetical protein.
59	Os1129	Os19040	1	2.89e-15		Os59	A2J10_01T0055600.1		A2J10_01T0116700.1	DNA gyrase subunit B, chloroplast/mitochondrial precursor, Putative, expressed	DNA gyrase subunit B, chloroplast/mitochondrial precursor, Putative, expressed	Similar to DNA gyrase B subunit.
60	Os1129	Os25922	1	3.11e-15		Os60	A2J10_05T0112100.1		MSTRG.24509.7	#N/A	#N/A	#N/A
61	Os1129	Os23456	1	3.11e-15		Os61	MSTRG.21171.1		MSTRG.278.3	#N/A	#N/A	#N/A
62	Os1129	Os31887	1	3.11e-15		Os62	A2J10_06T0254900.1		A2J10_09T0058800.7	Conserved hypothetical protein	#N/A	#N/A
63	Os1129	Os41897	1	3.11e-15		Os63	A2J10_10T0147000.1		A2J10_02T0322800.1	TBC domain containing protein, expressed	#N/A	#N/A
64	Os1129	Os43964	1	3.11e-15		Os64	A2J10_02T0129100.1		A2J10_04T0118300.3	OsSub41 - Putative Subtilisin homologue, expressed	#N/A	#N/A
65	Os1129	Os40986	1	3.11e-15		Os65	A2J10_03T0079400.1		MSTRG.15787.1	#N/A	copper methylamine oxidase precursor, Putative, expressed	Similar to Peroxisomal copper-containing amine oxidase.
66	Os1129	Os44122	1	3.33e-15		Os66	A2J10_07T0262900.4		A2J10_03T0269600.2	GCRP4 - Glycine and cysteine rich family protein precursor, expressed	#N/A	#N/A
67	Os1129	Os17695	1	3.33e-15		Os67	A2J10_07T0033700.1		MSTRG.3862.5	#N/A	#N/A	#N/A
68	Os1129	Os14120	1	3.55e-15		Os68	A2J10_03T0190300.1		MSTRG.4806.3	#N/A	#N/A	#N/A
69	Os1129	Os39778	1	4e-15		Os69	MSTRG.21016.1		A2J10_11T0098400.1	expressed protein	#N/A	#N/A
70	Os1129	Os21953	1	4.22e-15		Os70	A2J10_08T0068900.1		A2J10_03T0388300.1	AIG2-like family domain containing protein, expressed	AIG2-like family domain containing protein, expressed	Butirosin biosynthesis, BtrG-like domain containing protein.
71	Os1129	Os42439	1	4.44e-15		Os71	MSTRG.21329.1		MSTRG.26465.6	#N/A	#N/A	#N/A
72	Os1129	Os13316	1	4.44e-15		Os72	MSTRG.19290.1		MSTRG.1751.5	#N/A	#N/A	#N/A
73	Os1129	Os10643	1	5.33e-15		Os73	A2J10_01T0352600.3		MSTRG.15819.2	#N/A	#N/A	#N/A
74	Os1129	Os44117	1	5.33e-15		Os74	A2J10_04T0317200.1		MSTRG.25797.2	#N/A	#N/A	#N/A
75	Os1129	Os43120	1	5.77e-15		Os75	MSTRG.3380.1		MSTRG.15375.3	#N/A	#N/A	#N/A
76	Os1129	Os43754	1	6.66e-15		Os76	MSTRG.23160.1		MSTRG.17713.2	#N/A	#N/A	#N/A
77	Os1129	Os44220	1	7.33e-15		Os77	A2J10_02T0088600.1		A2J10_05T0198700.1	S-RNase-binding protein, Putative, expressed	S-RNase-binding protein, Putative, expressed	S-ribonuclease binding protein, SBP1, pollen domain containing protein.
78	Os1129	Os38435	1	7.99e-15		Os78	A2J10_07T0038100.1		MSTRG.10362.5	#N/A	#N/A	#N/A
79	Os1129	Os12914	1	8.22e-15		Os79	A2J10_04T0291600.1		MSTRG.19459.2	#N/A	#N/A	#N/A
80	Os1129	Os24611	1	8.88e-15		Os80	A2J10_10T0184300.3		A2J10_06T0297500.2	expressed protein	#N/A	#N/A
81	Os1129	Os38176	1	9.1e-15		Os81	A2J10_06T0125300.1		A2J10_12T0153300.1	Conserved hypothetical protein	#N/A	#N/A
82	Os1129	Os25234	1	1.11e-14		Os82	A2J10_07T0146900.1		MSTRG.13158.2	#N/A	#N/A	#N/A
83	Os1129	Os43348	1	1.18e-14		Os83	MSTRG.14119.2		MSTRG.13588.6	#N/A	#N/A	#N/A
84	Os1129	Os34484	1	1.2e-14		Os84	A2J10_06T0295500.1		A2J10_02T0272300.1	AP2 domain containing protein, expressed	#N/A	#N/A
85	Os5130	Os23409	1	1.2e-14		Os85	A2J10_03T0148600.3		MSTRG.11503.3	#N/A	#N/A	#N/A
86	Os1129	Os44295	1	1.24e-14		Os86	A2J10_07T0017200.1		MSTRG.20087.1	#N/A	expressed protein	C2 calcium-dependent membrane targeting domain containing protein.
87	Os1129	Os44283	1	1.47e-14		Os87	MSTRG.12897.3		MSTRG.8579.1	#N/A	membrane related protein CP5, Putative, expressed	#N/A
88	Os1129	Os43397	1	1.51e-14		Os88	MSTRG.8964.1		MSTRG.800.3	#N/A	#N/A	#N/A
89	Os1129	Os30386	1	1.62e-14		Os89	MSTRG.10170.1		A2J10_08T0109000.1	pyrophosphate--fructose 6-phosphate 1-phosphotransferase subunit alpha, Putative, expressed	pyrophosphate--fructose 6-phosphate 1-phosphotransferase subunit alpha, Putative, expressed	Similar to Fructose-6-phosphate 1-phosphotransferase (Fragment).
90	Os1129	Os42998	1	1.87e-14		Os90	MSTRG.25234.4		MSTRG.11767.1	#N/A	Putative expressed protein	#N/A
91	Os1129	Os19145	1	1.87e-14		Os91	MSTRG.8272.3		MSTRG.3076.6	#N/A	#N/A	#N/A
92	Os1129	Os18224	1	2e-14		Os92	A2J10_03T0119900.1		MSTRG.23866.1	#N/A	KIP1, Putative, expressed	KIP1-like domain containing protein.
93	Os1129	Os39699	1	2.04e-14		Os93	A2J10_08T0190400.1		A2J10_10T0091300.1	Conserved hypothetical protein	#N/A	#N/A
94	Os1129	Os43577	1	2.04e-14		Os94	A2J10_03T0091000.1		A2J10_09T0202500.1	ZOS9-17 - C2H2 zinc finger protein, expressed	#N/A	#N/A
95	Os1129	Os44030	1	2.26e-14		Os95	MSTRG.2205.2		MSTRG.1353.2	#N/A	#N/A	#N/A
96	Os1129	Os39110	1	2.42e-14		Os96	A2J10_06T0189100.1		MSTRG.26075.2	#N/A	#N/A	#N/A
97	Os1129	Os32365	1	2.58e-14		Os97	A2J10_04T0292800.1		A2J10_11T0034700.1	CPuORF6 - conserved peptide uORF-containing transcript, expressed	#N/A	#N/A
98	Os1129	Os44259	1	2.71e-14		Os98	A2J10_08T0012600.1		A2J10_06T0245000.1	Conserved hypothetical protein	#N/A	#N/A
99	Os1129	Os43236	1	2.75e-14		Os99	A2J10_03T0089300.1		MSTRG.26237.3	#N/A	#N/A	#N/A
100	Os1129	Os43809	1	2.98e-14		Os100	MSTRG.7874.1		A2J10_09T0089400.6	VQ domain containing protein, Putative, expressed	#N/A	#N/A
101	Os1129	Os24715	1	3.06e-14		Os101	A2J10_05T0043600.1		MSTRG.11301.5	#N/A	#N/A	#N/A
102	Os1129	Os43837	1	3.09e-14		Os102	A2J10_01T0026900.1		A2J10_05T0220300.3	trehalose-6-phosphate synthase, Putative, expressed	#N/A	#N/A
103	Os1129	Os42796	1	3.18e-14		Os103	A2J10_12T0152200.1		MSTRG.2747.1	#N/A	expressed protein	Topoisomerase II-associated protein PAT1 domain containing protein.
104	Os1129	Os40206	1	3.42e-14		Os104	A2J10_01T0030500.1		A2J10_01T0295600.1	expressed protein	expressed protein	Conserved hypothetical protein.
105	Os1129	Os35434	1	3.77e-14		Os105	MSTRG.3855.1		A2J10_01T0131400.2	MDR-like ABC transporter, Putative, expressed	#N/A	#N/A
106	Os1129	Os43061	1	3.8e-14		Os106	A2J10_05T0253300.1		MSTRG.1108.1	#N/A	ATPase, Putative, expressed	ATPase, AAA-type, core domain containing protein.
107	Os1129	Os30435	1	3.91e-14		Os107	MSTRG.21496.1		A2J10_10T0120700.1	oxidoreductase, short chain dehydrogenase/reductase family domain containing protein, expressed	oxidoreductase, short chain dehydrogenase/reductase family domain containing protein, expressed	Hypothetical protein.
108	Os1129	Os44044	1	4.09e-14		Os108	A2J10_04T0004500.1		A2J10_09T0125800.3	CBS domain containing protein, expressed	#N/A	#N/A
109	Os1129	Os8402	1	4.4e-14		Os109	A2J10_10T0158700.3		MSTRG.2711.3	#N/A	#N/A	#N/A
110	Os1129	Os25987	1	4.62e-14		Os110	A2J10_02T0207300.5		A2J10_07T0086400.1	erythronate-4-phosphate dehydrogenase domain containing protein, expressed	#N/A	#N/A
111	Os1129	Os43718	1	5.17e-14		Os111	A2J10_03T0152600.1		A2J10_02T0260100.1	expressed protein	#N/A	#N/A
112	Os1129	Os43562	1	5.46e-14		Os112	MSTRG.12596.1		A2J10_09T0178800.1	expressed protein	#N/A	#N/A
113	Os1129	Os43450	1	6.22e-14		Os113	A2J10_08T0141800.1		MSTRG.19844.1	#N/A	#N/A	#N/A
114	Os1129	Os43239	1	6.46e-14		Os114	A2J10_03T0182100.5		A2J10_09T0193700.1	Putative eukaryotic aspartyl protease domain containing protein, expressed	protein of unknown function domain containing protein, expressed	Similar to Ribonuclease P.
115	Os28327	Os42841	1	7.06e-14		Os115	A2J10_05T0193900.1		MSTRG.26786.6	#N/A	#N/A	#N/A
116	Os1129	Os25842	1	7.15e-14		Os116	A2J10_01T0068700.1		MSTRG.10833.4	#N/A	#N/A	#N/A
117	Os1129	Os41307	1	7.55e-14		Os117	A2J10_05T0159900.1		A2J10_10T0189700.2	mitochondrial carrier protein, Putative, expressed	#N/A	#N/A
118	Os1129	Os13599	1	7.75e-14		Os118	A2J10_03T0038300.1		A2J10_11T0194100.4	Putative sialyltransferase family domain containing protein, expressed	#N/A	#N/A
119	Os1129	Os43777	1	8.44e-14		Os119	MSTRG.13090.1		A2J10_02T0343900.1	immediate-early fungal elicitor protein CMPG1, Putative, expressed	#N/A	#N/A
120	Os1129	Os28982	1	8.5e-14		Os120	A2J10_01T0443700.1		MSTRG.10885.2	#N/A	#N/A	#N/A
121	Os28327	Os37285	1	8.84e-14		Os121	MSTRG.8783.3		A2J10_08T0233800.1	peptidyl-prolyl cis-trans isomerase, Putative, expressed	#N/A	#N/A
122	Os1129	Os16378	1	9.04e-14		Os122	MSTRG.23919.2		MSTRG.13745.2	#N/A	#N/A	#N/A
123	Os1129	Os39433	1	9.24e-14		Os123	A2J10_10T0055700.2		MSTRG.21576.1	#N/A	TKL_IRAK_DUF26-lh.2 - DUF26 kinases have homology to DUF26 containing loci, expressed	Response to drought in tolerant genotype Dagad desi, Response to submergence, Response to Xanthomonas oryzae pv. oryzae and B. glumae in resistant genotypes, Response to R. solani in susceptible rice genotype
124	Os1129	Os21020	1	9.86e-14		Os124	A2J10_11T0206700.1		A2J10_01T0435600.2	nuclear matrix protein 1, Putative, expressed	#N/A	#N/A
125	Os1129	Os43252	1	9.95e-14		Os125	MSTRG.219.1		A2J10_07T0221500.1	cytokinin-O-glucosyltransferase 2, Putative, expressed	cytokinin-O-glucosyltransferase 2, Putative, expressed	Similar to H0815C01.4 protein.
126	Os1129	Os22617	1	1e-13		Os126	A2J10_03T0190700.1		MSTRG.7445.1	#N/A	#N/A	#N/A
127	Os1129	Os26164	1	1.06e-13		Os127	MSTRG.13054.3		A2J10_02T0270000.1	OsClp3 - Putative Clp protease homologue, expressed	#N/A	#N/A
128	Os1129	Os44124	1	1.17e-13		Os128	A2J10_03T0169600.1		A2J10_09T0184200.1	expressed protein	#N/A	#N/A
129	Os1129	Os42125	1	1.27e-13		Os129	A2J10_07T0247800.1		A2J10_07T0015600.1	SCP-like extracellular protein, expressed	SCP-like extracellular protein, expressed	Allergen V5/Tpx-1 related family protein.
130	Os1129	Os22304	1	1.29e-13		Os130	A2J10_12T0158100.1		MSTRG.1972.7	#N/A	#N/A	#N/A
131	Os1129	Os44045	1	1.38e-13		Os131	A2J10_02T0207300.3		A2J10_03T0064700.2	protein kinase family protein, Putative, expressed	#N/A	#N/A
132	Os1129	Os40763	1	1.43e-13		Os132	MSTRG.12525.2		A2J10_05T0131500.1	Conserved hypothetical protein	#N/A	#N/A
133	Os1129	Os43059	1	1.53e-13		Os133	A2J10_10T0065800.1		MSTRG.17122.6	#N/A	#N/A	#N/A
134	Os1129	Os43541	1	1.63e-13		Os134	A2J10_09T0166700.1		A2J10_01T0006100.1	acetyl-CoA acetyltransferase, cytosolic, Putative, expressed	acetyl-CoA acetyltransferase, cytosolic, Putative, expressed	Similar to Acetyl-CoA C-acetyltransferase.
135	Os1129	Os37864	1	1.73e-13		Os135	A2J10_09T0139900.1		MSTRG.9417.3	#N/A	#N/A	#N/A
136	Os1129	Os44112	1	1.87e-13		Os136	MSTRG.20929.1		A2J10_01T0431800.1	starch binding domain containing protein, Putative, expressed	#N/A	#N/A
137	Os1129	Os44293	1	2.02e-13		Os137	A2J10_01T0413400.1		A2J10_01T0052700.1	acyl-protein thioesterase, Putative, expressed	#N/A	#N/A
138	Os1129	Os31916	1	2.09e-13		Os138	A2J10_06T0181700.1		MSTRG.25510.3	#N/A	#N/A	#N/A
139	Os1129	Os32496	1	2.11e-13		Os139	A2J10_06T0113500.1		A2J10_11T0168800.1	receptor-like protein kinase 2 precursor, Putative, expressed	receptor kinase, Putative, expressed	#N/A
140	Os1129	Os44008	1	2.16e-13		Os140	A2J10_07T0125600.1		A2J10_11T0002100.1	protein transport protein Sec61 subunit beta, Putative, expressed	#N/A	#N/A
141	Os1129	Os44294	1	2.16e-13		Os141	A2J10_01T0032400.1		MSTRG.25867.2	#N/A	#N/A	#N/A
142	Os1129	Os44275	1	2.25e-13		Os142	A2J10_12T0191700.1		A2J10_10T0074300.2	XI-I, Putative, expressed	#N/A	#N/A
143	Os1129	Os21962	1	2.3e-13		Os143	MSTRG.157.5		A2J10_11T0155300.3	exportin 1, Putative, expressed	#N/A	#N/A
144	Os1129	Os43922	1	2.36e-13		Os144	A2J10_04T0211700.1		MSTRG.20733.6	#N/A	#N/A	#N/A
145	Os1129	Os43526	1	2.5e-13		Os145	MSTRG.17875.2		MSTRG.62.6	#N/A	Hypothetical protein	Similar to Prolyl endopeptidase (EC 3.4.21.26) (Post-proline cleaving enzyme) (PE).
146	Os1129	Os43119	1	2.58e-13		Os146	A2J10_06T0292300.1		A2J10_02T0292200.1	RALFL8 - Rapid ALkalinization Factor RALF family protein precursor, expressed	RALFL8 - Rapid ALkalinization Factor RALF family protein precursor, expressed	Rapid ALkalinization Factor family protein.
147	Os1129	Os43086	1	2.87e-13		Os147	A2J10_08T0152100.1		MSTRG.4027.10	#N/A	#N/A	#N/A
148	Os1129	Os22157	1	2.92e-13		Os148	A2J10_05T0053900.1		A2J10_02T0207300.4	U-box domain containing protein, expressed	#N/A	#N/A
149	Os28327	Os40507	1	3.03e-13		Os149	MSTRG.25271.1		A2J10_03T0045500.6	dehydrogenase, Putative, expressed	#N/A	#N/A
150	Os1129	Os38100	1	3.21e-13		Os150	A2J10_12T0011700.1		MSTRG.1969.1	#N/A	CPuORF29 - conserved peptide uORF-containing transcript, expressed	Helix-loop-helix DNA-binding domain containing protein.
151	Os1129	Os31821	1	3.22e-13		Os151	A2J10_04T0188900.1		A2J10_01T0470500.1	expressed protein	#N/A	#N/A
152	Os1129	Os43849	1	3.31e-13		Os152	A2J10_01T0307800.1		A2J10_01T0492500.1	GRAS family transcription factor containing protein, expressed	#N/A	#N/A
153	Os1129	Os42602	1	3.49e-13		Os153	A2J10_06T0099400.1		A2J10_04T0125900.1	expressed protein	#N/A	#N/A
154	Os1129	Os22667	1	3.52e-13		Os154	MSTRG.16261.1		A2J10_05T0040800.1	Hypothetical protein	#N/A	#N/A
155	Os1129	Os43915	1	3.59e-13		Os155	A2J10_01T0095900.1		A2J10_03T0313000.3	Putative expressed protein	#N/A	#N/A
156	Os1129	Os42598	1	3.69e-13		Os156	MSTRG.17774.4		A2J10_05T0069600.3	Putative expressed protein	#N/A	#N/A
157	Os1129	Os31987	1	3.69e-13		Os157	MSTRG.14265.2		MSTRG.6648.4	#N/A	#N/A	#N/A
158	Os1129	Os22266	0.999999	3.9e-13		Os158	MSTRG.9044.1		A2J10_06T0138100.1	Putative RNA polymerase III RPC4 domain containing protein, expressed	#N/A	#N/A
159	Os1129	Os27095	0.999999	4.09e-13		Os159	A2J10_02T0309900.1		A2J10_12T0190400.1	Conserved hypothetical protein	#N/A	#N/A
160	Os1129	Os41722	0.999999	4.14e-13		Os160	A2J10_06T0250400.1		A2J10_02T0264000.3	DUF584 domain containing protein, Putative, expressed	#N/A	#N/A
161	Os1129	Os39087	0.999999	4.42e-13		Os161	A2J10_05T0102800.1		A2J10_11T0067900.1	expressed protein	#N/A	#N/A
162	Os3626	Os34142	0.999999	4.52e-13		Os162	MSTRG.72.1		MSTRG.10660.7	#N/A	#N/A	#N/A
163	Os1129	Os25996	0.999999	4.64e-13		Os163	A2J10_07T0196100.1		A2J10_10T0086600.4	transporter family protein, Putative, expressed	transporter family protein, Putative, expressed	Similar to Sugar transporter protein.
164	Os1129	Os32096	0.999999	4.65e-13		Os164	A2J10_01T0072600.1		MSTRG.23834.3	#N/A	#N/A	#N/A
165	Os1129	Os12571	0.999999	4.7e-13		Os165	A2J10_05T0112400.4		MSTRG.20648.1	#N/A	spastin, Putative, expressed	AAA-type ATPase, Plant spastin, Defense response, Leaf senescence
166	Os1129	Os12003	0.999999	4.73e-13		Os166	MSTRG.3898.1		A2J10_07T0240700.1	DUF1645 domain containing protein, Putative, expressed	DUF1645 domain containing protein, Putative, expressed	Protein of unknown function DUF1645 family protein.
167	Os1129	Os44073	0.999999	4.93e-13		Os167	MSTRG.8654.3		MSTRG.4643.2	#N/A	#N/A	#N/A
168	Os1129	Os43446	0.999999	5.04e-13		Os168	MSTRG.17616.1		MSTRG.14306.2	#N/A	#N/A	#N/A
169	Os1129	Os41838	0.999999	5.15e-13		Os169	A2J10_07T0047300.1		A2J10_01T0055600.1	transferase family protein, Putative, expressed	transferase family protein, Putative, expressed	Transferase family protein.
170	Os1129	Os28248	0.999999	5.44e-13		Os170	A2J10_01T0269400.1		MSTRG.3647.1	#N/A	sas10/Utp3 family protein, expressed	Sas10/Utp3/C1D domain containing protein.
171	Os1129	Os42156	0.999999	5.99e-13		Os171	MSTRG.5769.3		A2J10_05T0112100.1	WRKY53, expressed	#N/A	#N/A
172	Os1129	Os25404	0.999999	6.25e-13		Os172	A2J10_03T0377900.3		MSTRG.21171.1	#N/A	#N/A	#N/A
173	Os1129	Os25138	0.999999	6.56e-13		Os173	A2J10_11T0023400.1		MSTRG.16457.4	#N/A	PPR repeat domain containing protein, Putative, expressed	Pentatricopeptide repeat domain containing protein.
174	Os1129	Os38893	0.999999	6.64e-13		Os174	MSTRG.5253.1		A2J10_06T0254900.1	diphthamide biosynthesis protein 3, Putative, expressed	#N/A	#N/A
175	Os1129	Os41016	0.999999	7.11e-13		Os175	A2J10_06T0291200.1		A2J10_03T0153800.1	diphthine synthase, Putative, expressed	diphthine synthase, Putative, expressed	Similar to Diphthine synthase (EC 2.1.1.98) (Diphthamide biosynthesis methyltransferase).
176	Os1129	Os43597	0.999999	7.17e-13		Os176	A2J10_02T0189800.1		A2J10_10T0147000.1	heat shock protein DnaJ, Putative, expressed	heat shock protein DnaJ, Putative, expressed	Similar to chaperone protein dnaJ 13.
177	Os1129	Os13495	0.999999	7.37e-13		Os177	A2J10_04T0179400.1		A2J10_02T0129100.1	OsFBX44 - F-box domain containing protein, expressed	OsFBX44 - F-box domain containing protein, expressed	Cyclin-like F-box domain containing protein.
178	Os1129	Os31596	0.999999	7.43e-13		Os178	A2J10_07T0222100.5		A2J10_03T0079400.1	zinc finger, C3HC4 type domain containing protein, expressed	zinc finger, C3HC4 type domain containing protein, expressed	Similar to protein binding protein.
179	Os1129	Os26055	0.999999	7.9e-13		Os179	A2J10_05T0209200.2		MSTRG.11391.6	#N/A	#N/A	#N/A
180	Os1129	Os41633	0.999999	7.94e-13		Os180	A2J10_11T0016800.2		MSTRG.26345.3	#N/A	#N/A	#N/A
181	Os1129	Os16486	0.999999	8.02e-13		Os181	MSTRG.458.1		A2J10_07T0262900.4	Putative SAC3/GANP family protein, expressed	#N/A	Conserved hypothetical protein.
182	Os1129	Os42782	0.999999	8.21e-13		Os182	A2J10_06T0004500.1		MSTRG.7308.1	#N/A	Putative C2 domain containing protein, expressed	Similar to C2 domain containing protein.
183	Os1129	Os29725	0.999999	8.45e-13		Os183	A2J10_10T0108600.1		A2J10_07T0033700.1	polynucleotide phosphorylase, Putative, expressed	polynucleotide phosphorylase, Putative, expressed	Similar to Polyribonucleotide phophorylase (Fragment).
184	Os1129	Os43983	0.999999	8.47e-13		Os184	MSTRG.12293.1		A2J10_03T0190300.1	EF hand family protein, expressed	Putative EF hand family protein, expressed	EF-Hand type domain containing protein.
185	Os1129	Os25715	0.999999	8.5e-13		Os185	A2J10_12T0162500.1		MSTRG.14437.1	#N/A	expressed protein	Protein of unknown function DUF1618 domain containing protein.
186	Os1129	Os44050	0.999999	8.52e-13		Os186	A2J10_03T0388600.1		MSTRG.27056.6	#N/A	#N/A	#N/A
187	Os1129	Os33367	0.999999	8.78e-13		Os187	A2J10_03T0014400.1		MSTRG.21016.1	#N/A	protein kinase family protein, Putative, expressed	Serine/threonine protein kinase-related domain containing protein.
188	Os1129	Os28992	0.999999	9.37e-13		Os188	A2J10_04T0240500.1		MSTRG.9861.1	#N/A	#N/A	#N/A
189	Os1129	Os44016	0.999999	9.73e-13		Os189	A2J10_03T0263300.1		MSTRG.22350.2	#N/A	#N/A	#N/A
190	Os1129	Os44246	0.999999	1e-12		Os190	MSTRG.3990.1		A2J10_07T0075900.2	Putative expressed protein	#N/A	#N/A
191	Os1129	Os35074	0.999999	1.02e-12		Os191	A2J10_10T0168700.1		A2J10_08T0068900.1	Conserved hypothetical protein	#N/A	#N/A
192	Os1129	Os1760	0.999999	1.05e-12		Os192	A2J10_07T0178500.1		MSTRG.21329.1	#N/A	#N/A	#N/A
193	Os1129	Os44113	0.999999	1.15e-12		Os193	MSTRG.13247.2		MSTRG.19290.1	#N/A	MYB family transcription factor, Putative, expressed	R2R3-MYB transcription factor, Tolerance to high temperature, Modulation of amino acid metabolism, Anthocyanin synthesis, Hormonal signaling
194	Os1129	Os42862	0.999999	1.23e-12		Os194	MSTRG.17163.1		MSTRG.2101.3	#N/A	#N/A	#N/A
195	Os1129	Os4678	0.999999	1.23e-12		Os195	A2J10_03T0386400.3		A2J10_01T0352600.3	AP2 domain containing protein, expressed	#N/A	#N/A
196	Os1129	Os21679	0.999999	1.24e-12		Os196	A2J10_02T0024800.1		MSTRG.6182.1	#N/A	cytokinin-N-glucosyltransferase 1, Putative, expressed	Similar to UDP-glucosyltransferase BX8.
197	Os1129	Os44108	0.999999	1.27e-12		Os197	MSTRG.25273.1		A2J10_04T0317200.1	cytokinin-N-glucosyltransferase 1, Putative, expressed	#N/A	#N/A
198	Os1129	Os12672	0.999999	1.31e-12		Os198	A2J10_01T0108300.1		MSTRG.14556.6	#N/A	#N/A	#N/A
199	Os25570	Os42632	0.999999	1.33e-12		Os199	A2J10_07T0286300.1		A2J10_03T0344400.3	Putative expressed protein	#N/A	#N/A
200	Os5130	Os42487	0.999999	1.33e-12		Os200	A2J10_04T0289000.3		MSTRG.25430.3	#N/A	#N/A	#N/A
201	Os1129	Os38573	0.999999	1.36e-12		Os201	A2J10_01T0315900.4		MSTRG.3380.1	#N/A	AP2 domain containing protein, expressed	AP2/ERF transcription factor, Abiotic stress response, Salt stress response
202	Os1129	Os43179	0.999999	1.36e-12		Os202	A2J10_11T0237100.1		MSTRG.23160.1	#N/A	sex determination protein tasselseed-2, Putative, expressed	Similar to Stem secoisolariciresinol dehydrogenase (Fragment).
203	Os1129	Os37363	0.999999	1.36e-12		Os203	MSTRG.20583.2		A2J10_07T0271200.3	Conserved hypothetical protein	#N/A	#N/A
204	Os1129	Os43309	0.999999	1.42e-12		Os204	A2J10_04T0324400.1		A2J10_01T0387800.1	Conserved hypothetical protein	#N/A	#N/A
205	Os1129	Os38365	0.999999	1.43e-12		Os205	A2J10_07T0248500.1		A2J10_02T0088600.1	Conserved hypothetical protein	#N/A	#N/A
206	Os5130	Os19586	0.999999	1.43e-12		Os206	A2J10_11T0188000.1		MSTRG.18786.2	#N/A	#N/A	#N/A
207	Os1129	Os42901	0.999999	1.43e-12		Os207	A2J10_11T0184400.1		A2J10_07T0038100.1	expressed protein	#N/A	#N/A
208	Os1129	Os22174	0.999999	1.49e-12		Os208	A2J10_07T0194200.2		A2J10_03T0161100.5	proline-rich family protein, Putative, expressed	#N/A	#N/A
209	Os1129	Os28595	0.999999	1.53e-12		Os209	A2J10_01T0298600.1		A2J10_04T0291600.1	peroxidase precursor, Putative, expressed	#N/A	#N/A
210	Os1129	Os42854	0.999999	1.53e-12		Os210	A2J10_06T0022500.4		MSTRG.6810.1	#N/A	#N/A	#N/A
211	Os1129	Os12358	0.999999	1.56e-12		Os211	A2J10_08T0077200.1		A2J10_02T0122500.9	resistance protein, Putative, expressed	#N/A	#N/A
212	Os1129	Os43008	0.999999	1.58e-12		Os212	A2J10_01T0315700.1		MSTRG.25588.1	#N/A	#N/A	#N/A
213	Os1129	Os30180	0.999999	1.6e-12		Os213	A2J10_04T0146600.1		A2J10_10T0184300.3	Putative expressed protein	#N/A	#N/A
214	Os1129	Os43999	0.999999	1.61e-12		Os214	A2J10_02T0127400.1		MSTRG.25289.5	#N/A	#N/A	#N/A
215	Os1129	Os28333	0.999999	1.64e-12		Os215	A2J10_04T0054900.1		MSTRG.3918.2	#N/A	#N/A	#N/A
216	Os1129	Os28731	0.999999	1.81e-12		Os216	A2J10_11T0151300.6		MSTRG.15527.3	#N/A	#N/A	#N/A
217	Os1129	Os41317	0.999999	1.84e-12		Os217	A2J10_06T0300100.1		A2J10_06T0125300.1	cytochrome P450, Putative, expressed	#N/A	#N/A
218	Os1129	Os17777	0.999999	1.85e-12		Os218	A2J10_01T0509900.1		MSTRG.20728.3	#N/A	#N/A	#N/A
219	Os1129	Os39727	0.999999	1.87e-12		Os219	A2J10_05T0176600.2		A2J10_06T0288800.3	Conserved hypothetical protein	#N/A	#N/A
220	Os3626	Os38676	0.999999	1.91e-12		Os220	A2J10_10T0144100.1		MSTRG.6999.4	#N/A	#N/A	#N/A
221	Os1129	Os44125	0.999999	2.08e-12		Os221	A2J10_08T0161600.1		A2J10_07T0146900.1	UDP-glucoronosyl and UDP-glucosyl transferase domain containing protein, expressed	#N/A	Hypothetical protein.
222	Os1129	Os22050	0.999999	2.11e-12		Os222	A2J10_03T0385000.1		MSTRG.14119.2	#N/A	#N/A	#N/A
223	Os1129	Os43282	0.999999	2.16e-12		Os223	A2J10_01T0100800.1		MSTRG.22518.9	#N/A	#N/A	#N/A
224	Os1129	Os17729	0.999999	2.22e-12		Os224	A2J10_02T0324900.1		MSTRG.20684.5	#N/A	#N/A	#N/A
225	Os1129	Os44261	0.999999	2.26e-12		Os225	A2J10_03T0022300.1		A2J10_11T0185700.2	thioredoxin domain-containing protein 9, Putative, expressed	#N/A	#N/A
226	Os5130	Os23679	0.999999	2.26e-12		Os226	A2J10_01T0307700.1		MSTRG.26237.1	#N/A	#N/A	#N/A
227	Os28327	Os43920	0.999999	2.28e-12		Os227	MSTRG.24153.1		MSTRG.22248.1	#N/A	peptidase, M24 family protein, Putative, expressed	Similar to Xaa-Pro dipeptidase (EC 3.4.-.-).
228	Os1129	Os43545	0.999999	2.28e-12		Os228	MSTRG.24286.1		MSTRG.13568.2	#N/A	Conserved hypothetical protein	Similar to predicted protein.
229	Os1129	Os41692	0.999999	2.32e-12		Os229	A2J10_03T0260500.1		A2J10_10T0099400.1	phenylalanyl-tRNA synthetase, Putative, expressed	#N/A	#N/A
230	Os1129	Os42768	0.999999	2.41e-12		Os230	MSTRG.21550.1		MSTRG.25707.7	#N/A	#N/A	#N/A
231	Os1129	Os37279	0.999999	2.62e-12		Os231	A2J10_04T0079700.1		MSTRG.1459.1	#N/A	tetratricopeptide repeat containing protein, Putative, expressed	Homolog of fluorescent (FLU) in Arabidopsis thaliana, Tetratricopeptide repeat (TPR)-containing protein, Regulation of chlorophyll biosynthesis
232	Os1129	Os29016	0.999999	2.64e-12		Os232	MSTRG.10471.2		A2J10_06T0295500.1	BRE, Putative, expressed	BRE, Putative, expressed	Brain and reproductive organ-expressed family protein.
233	Os1129	Os25686	0.999999	2.65e-12		Os233	A2J10_03T0185400.1		MSTRG.7864.12	#N/A	#N/A	#N/A
234	Os1129	Os25250	0.999999	2.67e-12		Os234	A2J10_01T0090700.5		MSTRG.5934.1	#N/A	endonuclease III-like protein 1, Putative, expressed	#N/A
235	Os1129	Os44007	0.999999	2.84e-12		Os235	A2J10_12T0003900.3		A2J10_12T0142300.1	calmodulin binding protein, Putative, expressed	calmodulin binding protein, Putative, expressed	Calmodulin binding protein-like family protein.
236	Os1129	Os23223	0.999999	2.88e-12		Os236	A2J10_03T0191100.1		A2J10_03T0148600.3	ultraviolet-B-repressible protein, Putative, expressed	#N/A	#N/A
237	Os1129	Os13079	0.999999	2.89e-12		Os237	MSTRG.14997.1		MSTRG.6479.1	#N/A	#N/A	#N/A
238	Os1129	Os40607	0.999999	2.9e-12		Os238	A2J10_01T0280500.1		A2J10_05T0138700.1	tetratricopeptide repeat containing protein, Putative, expressed	tetratricopeptide repeat containing protein, Putative, expressed	Tetratricopeptide-like helical domain containing protein.
239	Os1129	Os8325	0.999999	2.93e-12		Os239	A2J10_09T0145000.1		A2J10_07T0017200.1	SCP-like extracellular protein, expressed	#N/A	#N/A
240	Os1129	Os34969	0.999999	3.05e-12		Os240	MSTRG.4663.1		A2J10_04T0153000.1	DEAD-box ATP-dependent RNA helicase, Putative, expressed	DEAD-box ATP-dependent RNA helicase, Putative, expressed	Similar to RNA helicase (Fragment).
241	Os1129	Os34077	0.999999	3.08e-12		Os241	A2J10_03T0199200.1		A2J10_12T0149200.1	thaumatin family domain containing protein, expressed	thaumatin family domain containing protein, expressed	Osmotin protein
242	Os1129	Os30561	0.999999	3.12e-12		Os242	MSTRG.17628.3		MSTRG.22145.6	#N/A	#N/A	#N/A
243	Os1129	Os41141	0.999999	3.14e-12		Os243	A2J10_05T0008100.1		A2J10_06T0298500.4	hydrolase, acting on carbon-nitrogen, Putative, expressed	hydrolase, acting on carbon-nitrogen, Putative, expressed	Protein of unknown function DUF616 family protein.
244	Os1129	Os44135	0.999999	3.17e-12		Os244	A2J10_04T0307900.1		MSTRG.12897.3	#N/A	#N/A	#N/A
245	Os1129	Os40766	0.999999	3.17e-12		Os245	MSTRG.23959.1		MSTRG.2027.1	#N/A	#N/A	#N/A
246	Os1129	Os44004	0.999999	3.2e-12		Os246	A2J10_01T0315400.1		MSTRG.22757.3	#N/A	#N/A	Similar to COP9 signalosome complex subunit 7 (CSN complex subunit 7) (FUSCA protein 5) (FUSCA5).
247	Os1129	Os38938	0.999999	3.26e-12		Os247	A2J10_03T0396200.2		MSTRG.8037.4	#N/A	#N/A	#N/A
248	Os1129	Os18377	0.999999	3.3e-12		Os248	A2J10_01T0430700.1		MSTRG.8964.1	#N/A	#N/A	#N/A
249	Os1129	Os41903	0.999999	3.31e-12		Os249	MSTRG.18775.1		MSTRG.1202.1	#N/A	peroxidase precursor, Putative, expressed	Similar to Peroxidase (Fragment).
250	Os1129	Os12718	0.999999	3.32e-12		Os250	MSTRG.12861.2		MSTRG.10170.1	#N/A	heavy metal transport/detoxification protein, Putative, expressed	Heavy metal transport/detoxification protein domain containing protein.
251	Os1129	Os25999	0.999998	3.38e-12		Os251	A2J10_11T0044300.1		MSTRG.25234.4	#N/A	#N/A	#N/A
252	Os1129	Os28964	0.999998	3.43e-12		Os252	MSTRG.14646.2		MSTRG.8272.3	#N/A	#N/A	#N/A
253	Os28327	Os42827	0.999998	3.48e-12		Os253	A2J10_08T0180700.1		A2J10_03T0119900.1	GTPase-activating protein, Putative, expressed	GTPase-activating protein, Putative, expressed	Arf GTPase activating protein family protein.
254	Os1129	Os36944	0.999998	3.55e-12		Os254	MSTRG.16528.1		A2J10_08T0190400.1	expressed protein	#N/A	#N/A
255	Os1129	Os19069	0.999998	3.66e-12		Os255	MSTRG.26433.1		MSTRG.253.3	#N/A	Putative expressed protein	#N/A
256	Os1129	Os29113	0.999998	3.71e-12		Os256	A2J10_08T0101000.1		MSTRG.18364.2	#N/A	#N/A	#N/A
257	Os1129	Os17214	0.999998	3.81e-12		Os257	MSTRG.4355.1		MSTRG.16989.1	#N/A	cysteine synthase, Putative, expressed	Pyridoxal phosphate-dependent enzyme, beta subunit domain containing protein.
258	Os1129	Os18699	0.999998	3.82e-12		Os258	A2J10_02T0352700.1		A2J10_07T0150900.2	AML1, Putative, expressed	#N/A	#N/A
259	Os1129	Os25955	0.999998	3.86e-12		Os259	A2J10_04T0215200.2		A2J10_03T0091000.1	glutathione S-transferase, Putative, expressed	#N/A	#N/A
260	Os1129	Os35155	0.999998	3.9e-12		Os260	A2J10_10T0164600.1		MSTRG.2205.2	#N/A	#N/A	#N/A
261	Os1129	Os44167	0.999998	3.92e-12		Os261	A2J10_05T0019300.1		A2J10_06T0189100.1	reticuline oxidase-like protein precursor, Putative, expressed	reticuline oxidase-like protein precursor, Putative, expressed	Similar to Nectarin 5 (Fragment).
262	Os1129	Os31628	0.999998	4e-12		Os262	A2J10_03T0041900.1		A2J10_04T0292800.1	Conserved hypothetical protein	#N/A	#N/A
263	Os1129	Os40857	0.999998	4.07e-12		Os263	A2J10_04T0125400.1		A2J10_08T0012600.1	succinate dehydrogenase iron-sulfur subunit 2,mitochondrial precursor, Putative, expressed	#N/A	#N/A
264	Os1129	Os17107	0.999998	4.57e-12		Os264	MSTRG.10695.1		A2J10_02T0272200.1	vacuolar protein-sorting protein bro1, Putative, expressed	#N/A	#N/A
265	Os3626	Os38714	0.999998	4.84e-12		Os265	MSTRG.3354.1		MSTRG.1806.3	#N/A	#N/A	#N/A
266	Os1129	Os37853	0.999998	4.93e-12		Os266	A2J10_04T0188600.1		A2J10_03T0089300.1	Putative expressed protein	#N/A	#N/A
267	Os1129	Os41854	0.999998	5.01e-12		Os267	A2J10_03T0041500.1		MSTRG.7874.1	#N/A	PWWP domain containing protein, expressed	PWWP domain containing protein.
268	Os1129	Os43414	0.999998	5.07e-12		Os268	A2J10_02T0110400.1		MSTRG.1885.1	#N/A	endonuclease/exonuclease/phosphatase family domain containing protein, expressed	Endonuclease/exonuclease/phosphatase domain containing protein.
269	Os1129	Os28809	0.999998	5.07e-12		Os269	A2J10_02T0218300.1		MSTRG.9735.11	#N/A	#N/A	#N/A
270	Os1129	Os18232	0.999998	5.2e-12		Os270	A2J10_08T0227600.1		A2J10_05T0043600.1	expressed protein	#N/A	Conserved hypothetical protein.
271	Os1129	Os42837	0.999998	5.22e-12		Os271	A2J10_12T0135900.1		A2J10_01T0026900.1	calmodulin binding protein, Putative, expressed	#N/A	#N/A
272	Os1129	Os28984	0.999998	5.25e-12		Os272	A2J10_06T0066100.1		A2J10_12T0152200.1	GRAS family transcription factor domain containing protein, expressed	GRAS family transcription factor domain containing protein, expressed	GRAS transcription factor domain containing protein.
273	Os1129	Os25496	0.999998	5.28e-12		Os273	MSTRG.21918.2		MSTRG.24936.5	#N/A	#N/A	#N/A
274	Os3626	Os3692	0.999998	5.33e-12		Os274	MSTRG.3091.1		A2J10_05T0077000.1	Conserved hypothetical protein	#N/A	#N/A
275	Os1129	Os25942	0.999998	5.42e-12		Os275	A2J10_08T0204800.1		MSTRG.17774.3	#N/A	#N/A	#N/A
276	Os1129	Os35373	0.999998	5.7e-12		Os276	A2J10_05T0205000.1		MSTRG.2323.9	#N/A	#N/A	#N/A
277	Os1129	Os43900	0.999998	5.71e-12		Os277	A2J10_04T0132400.1		A2J10_01T0030500.1	B3 DNA binding domain containing protein, expressed	#N/A	#N/A
278	Os1129	Os44199	0.999998	5.83e-12		Os278	MSTRG.5044.1		MSTRG.3855.1	#N/A	zinc finger, C3HC4 type domain containing protein, expressed	Pi-starvation induced RING-type E3 ligase, Pi homeostasis
279	Os1129	Os44268	0.999998	6.01e-12		Os279	MSTRG.18272.2		MSTRG.11957.5	#N/A	#N/A	#N/A
280	Os1129	Os37346	0.999998	6.04e-12		Os280	MSTRG.527.1		MSTRG.3450.1	#N/A	#N/A	#N/A
281	Os1129	Os43320	0.999998	6.14e-12		Os281	A2J10_03T0112700.2		MSTRG.8260.4	#N/A	#N/A	#N/A
282	Os1129	Os8724	0.999998	6.26e-12		Os282	A2J10_02T0292500.1		A2J10_05T0253300.1	3-deoxy-manno-octulosonate cytidylyltransferase, Putative, expressed	3-deoxy-manno-octulosonate cytidylyltransferase, Putative, expressed	Similar to CMP-KDO synthetase (EC 2.7.7.38) (Fragment).
283	Os1129	Os26175	0.999998	6.4e-12		Os283	MSTRG.1903.1		A2J10_03T0317600.4	PHD finger family protein, Putative, expressed	#N/A	#N/A
284	Os1129	Os25478	0.999998	6.65e-12		Os284	A2J10_02T0054200.1		MSTRG.21496.1	#N/A	#N/A	#N/A
285	Os1129	Os2730	0.999998	6.88e-12		Os285	A2J10_06T0226900.1		A2J10_04T0004500.1	pentatricopeptide domain containing protein, Putative, expressed	pentatricopeptide domain containing protein, Putative, expressed	Pentatricopeptide repeat domain containing protein.
286	Os1129	Os22543	0.999998	6.9e-12		Os286	A2J10_06T0091400.4		MSTRG.18744.2	#N/A	Hypothetical protein	#N/A
287	Os1129	Os44069	0.999998	6.98e-12		Os287	MSTRG.4929.3		A2J10_10T0158700.3	glutathione S-transferase GSTU6, Putative, expressed	#N/A	#N/A
288	Os1129	Os42593	0.999998	7.13e-12		Os288	A2J10_06T0152200.1		MSTRG.21577.7	#N/A	#N/A	#N/A
289	Os1129	Os44250	0.999998	7.26e-12		Os289	MSTRG.14585.3		A2J10_10T0055200.3	Putative S1 RNA binding domain containing protein, expressed	#N/A	#N/A
290	Os5130	Os30264	0.999998	7.26e-12		Os290	A2J10_01T0358000.1		A2J10_11T0108200.1	Hypothetical protein	mitochondrial carrier protein, Putative, expressed	#N/A
291	Os3626	Os38717	0.999998	7.42e-12		Os291	A2J10_07T0270100.1		A2J10_02T0207300.5	U-box domain containing protein, expressed	#N/A	#N/A
292	Os1129	Os25688	0.999998	7.7e-12		Os292	MSTRG.23044.1		A2J10_11T0090800.1	DNA-directed RNA polymerase subunit beta, Putative, expressed	#N/A	#N/A
293	Os1129	Os35202	0.999998	7.75e-12		Os293	A2J10_01T0028600.1		A2J10_03T0152600.1	beta-amylase, Putative, expressed	#N/A	#N/A
294	Os1129	Os11823	0.999998	7.79e-12		Os294	A2J10_12T0028800.1		A2J10_03T0094300.1	expressed protein	Putative expressed protein	Conserved hypothetical protein.
295	Os1129	Os42805	0.999998	7.8e-12		Os295	MSTRG.3885.2		MSTRG.12596.1	#N/A	asparagine synthetase, Putative, expressed	Asparagine synthetase, Biosynthesis of asparagine following the supply of ammonium
296	Os1129	Os2054	0.999998	7.93e-12		Os296	A2J10_02T0331300.1		A2J10_11T0017600.1	D-mannose binding lectin family protein, expressed	ubiquitin carboxyl-terminal hydrolase, family 1, Putative, expressed	#N/A
297	Os1129	Os43951	0.999998	8.05e-12		Os297	MSTRG.3329.1		MSTRG.4506.5	#N/A	#N/A	#N/A
298	Os1129	Os40249	0.999998	8.11e-12		Os298	MSTRG.14305.1		A2J10_08T0141800.1	armadillo/beta-catenin repeat family protein, Putative, expressed	armadillo/beta-catenin repeat family protein, Putative, expressed	Hypothetical gene.
299	Os1129	Os39456	0.999998	8.27e-12		Os299	A2J10_01T0067200.1		A2J10_03T0180400.1	splicing factor, arginine/serine-rich 16, Putative, expressed	splicing factor, arginine/serine-rich 16, Putative, expressed	Hypothetical conserved gene.
300	Os1129	Os32718	0.999998	8.33e-12		Os300	MSTRG.9280.3		MSTRG.1360.10	#N/A	#N/A	#N/A
301	Os1129	Os43393	0.999998	8.34e-12		Os301	A2J10_03T0109900.1		A2J10_05T0165400.3	galactosyltransferase, Putative, expressed	#N/A	#N/A
302	Os5130	Os29839	0.999998	8.36e-12		Os302	A2J10_05T0005100.1		A2J10_12T0026800.1	citrate-binding protein precursor, Putative, expressed	citrate-binding protein precursor, Putative, expressed	Similar to Citrate binding protein precursor.
303	Os1129	Os13619	0.999998	8.76e-12		Os303	MSTRG.7189.2		A2J10_03T0182100.5	ring-H2 zinc finger protein, Putative, expressed	#N/A	#N/A
304	Os1129	Os13355	0.999998	8.77e-12		Os304	MSTRG.27106.1		A2J10_05T0193900.1	DNA binding protein, Putative, expressed	DNA binding protein, Putative, expressed	Protein of unknown function DUF296 domain containing protein.
305	Os1129	Os2362	0.999998	8.85e-12		Os305	A2J10_01T0191700.1		A2J10_09T0103900.1	1-phosphatidylinositol-4-phosphate 5-kinase/ zinc ion binding protein, Putative, expressed	#N/A	#N/A
306	Os1129	Os27121	0.999998	8.95e-12		Os306	MSTRG.2950.4		A2J10_04T0194000.1	glucosyltransferase, Putative, expressed	#N/A	#N/A
307	Os28327	Os43804	0.999998	9.12e-12		Os307	MSTRG.9934.1		A2J10_01T0068700.1	expressed protein	#N/A	#N/A
308	Os1129	Os44222	0.999998	9.14e-12		Os308	A2J10_12T0042200.1		A2J10_05T0159900.1	expressed protein	#N/A	#N/A
309	Os28327	Os43005	0.999998	9.32e-12		Os309	MSTRG.18105.1		A2J10_03T0038300.1	heavy-metal-associated domain-containing protein, Putative, expressed	heavy-metal-associated domain-containing protein, Putative, expressed	Heavy metal transport/detoxification protein domain containing protein.
310	Os1129	Os42273	0.999998	9.37e-12		Os310	A2J10_06T0268300.1		MSTRG.13090.1	#N/A	transposon protein, Putative, unclassified, expressed	Similar to cytochrome P450 flavonoid 3',5'-hydroxylase.
311	Os1129	Os20986	0.999997	9.37e-12		Os311	A2J10_06T0303700.2		A2J10_01T0443700.1	Putative expressed protein	#N/A	#N/A
312	Os5130	Os38714	0.999997	9.79e-12		Os312	MSTRG.24655.2		A2J10_05T0176400.1	expressed protein	expressed protein	Mediator complex, subunit Med13 domain containing protein.
313	Os1129	Os39239	0.999997	9.79e-12		Os313	A2J10_01T0172200.1		MSTRG.14483.1	#N/A	indole-3-glycerol phosphate lyase, chloroplast precursor, Putative, expressed	Similar to Indole synthase.
314	Os1129	Os12391	0.999997	9.81e-12		Os314	MSTRG.8070.1		MSTRG.8783.3	#N/A	#N/A	#N/A
315	Os1129	Os24975	0.999997	9.9e-12		Os315	MSTRG.216.3		MSTRG.15433.4	#N/A	#N/A	#N/A
316	Os1129	Os41694	0.999997	1.03e-11		Os316	A2J10_01T0293000.3		A2J10_08T0125800.1	Conserved hypothetical protein	#N/A	#N/A
317	Os1129	Os25809	0.999997	1.09e-11		Os317	A2J10_11T0008600.1		MSTRG.11369.14	#N/A	#N/A	#N/A
318	Os1129	Os43766	0.999997	1.1e-11		Os318	A2J10_07T0150600.1		MSTRG.23919.2	#N/A	peroxidase precursor, Putative, expressed	Similar to Peroxidase.
319	Os1129	Os32086	0.999997	1.1e-11		Os319	MSTRG.7818.1		A2J10_06T0172800.1	2-oxo acid dehydrogenases acyltransferase domain containing protein, expressed	#N/A	#N/A
320	Os1129	Os44134	0.999997	1.13e-11		Os320	A2J10_01T0177900.3		MSTRG.17167.4	#N/A	#N/A	#N/A
321	Os1129	Os25065	0.999997	1.14e-11		Os321	MSTRG.16387.2		A2J10_10T0055700.2	response regulator receiver domain containing protein, expressed	#N/A	#N/A
322	Os28327	Os43765	0.999997	1.16e-11		Os322	A2J10_12T0005500.1		A2J10_09T0077100.1	leucine zipper protein-like, Putative, expressed	leucine zipper protein-like, Putative, expressed	Exo70 exocyst complex subunit family protein.
323	Os1129	Os18695	0.999997	1.18e-11		Os323	MSTRG.23700.1		A2J10_11T0206700.1	RGH1A, Putative, expressed	disease resistance protein RPM1, Putative, expressed	#N/A
324	Os1129	Os43850	0.999997	1.19e-11		Os324	A2J10_03T0025000.2		MSTRG.1260.3	#N/A	#N/A	#N/A
325	Os1129	Os41846	0.999997	1.19e-11		Os325	A2J10_08T0100900.1		MSTRG.219.1	#N/A	ZOS1-03 - C2H2 zinc finger protein, expressed	Zinc finger, C2H2-like domain containing protein.
326	Os3626	Os15007	0.999997	1.21e-11		Os326	A2J10_03T0076800.2		A2J10_03T0372800.1	uncharacterized Cys-rich domain containing protein, Putative, expressed	#N/A	#N/A
327	Os1129	Os26123	0.999997	1.22e-11		Os327	A2J10_02T0218800.1		A2J10_09T0008200.2	CCAAT/enhancer-binding protein, Putative, expressed	#N/A	#N/A
328	Os1129	Os22683	0.999997	1.22e-11		Os328	MSTRG.530.1		A2J10_04T0156400.1	L-allo-threonine aldolase, Putative, expressed	L-allo-threonine aldolase, Putative, expressed	Pyridoxal phosphate-dependent transferase, major region, subdomain 1 domain containing protein.
329	Os1129	Os22139	0.999997	1.22e-11		Os329	MSTRG.3408.1		A2J10_03T0190700.1	metal cation transporter, Putative, expressed	metal cation transporter, Putative, expressed	Similar to Metal transport protein.
330	Os1129	Os23453	0.999997	1.25e-11		Os330	MSTRG.12712.1		MSTRG.13054.3	#N/A	#N/A	#N/A
331	Os1129	Os1638	0.999997	1.25e-11		Os331	MSTRG.12151.1		A2J10_08T0119600.1	expressed protein	#N/A	#N/A
332	Os1129	Os38483	0.999997	1.26e-11		Os332	A2J10_01T0082200.1		A2J10_01T0104300.1	Putative ZOS1-06 - C2H2 zinc finger protein, expressed	#N/A	#N/A
333	Os1129	Os32528	0.999997	1.26e-11		Os333	MSTRG.17810.2		MSTRG.15895.1	#N/A	#N/A	#N/A
334	Os1129	Os42133	0.999997	1.27e-11		Os334	MSTRG.17430.1		A2J10_12T0171600.1	helix-loop-helix DNA-binding domain containing protein, expressed	#N/A	#N/A
335	Os1129	Os25695	0.999997	1.29e-11		Os335	A2J10_01T0260000.1		MSTRG.1972.6	#N/A	#N/A	#N/A
336	Os1129	Os28418	0.999997	1.3e-11		Os336	MSTRG.24245.1		A2J10_03T0169600.1	GPI-anchored wall transfer protein 1, Putative, expressed	GPI-anchored wall transfer protein 1, Putative, expressed	GWT1 family protein.
337	Os1129	Os43499	0.999997	1.32e-11		Os337	MSTRG.15892.2		A2J10_07T0247800.1	lactate/malate dehydrogenase, Putative, expressed	#N/A	#N/A
338	Os5130	Os26719	0.999997	1.32e-11		Os338	A2J10_11T0032700.1		A2J10_12T0158100.1	ZOS12-09 - C2H2 zinc finger protein, expressed	ZOS12-09 - C2H2 zinc finger protein, expressed	TFIIIA-type zinc finger protein, Tolerance to salt and drought stresses
339	Os1129	Os21676	0.999997	1.35e-11		Os339	A2J10_06T0069200.1		MSTRG.17896.3	#N/A	#N/A	#N/A
340	Os1129	Os37690	0.999997	1.36e-11		Os340	A2J10_03T0284800.1		A2J10_02T0207300.3	U-box domain containing protein, expressed	#N/A	#N/A
341	Os1129	Os41719	0.999997	1.38e-11		Os341	MSTRG.11070.3		A2J10_02T0025800.4	zinc finger, C3HC4 type family protein, expressed	#N/A	#N/A
342	Os3626	Os33015	0.999997	1.42e-11		Os342	MSTRG.8960.1		MSTRG.17457.4	#N/A	#N/A	SNF2 N-terminal domain and helicase C-terminal domain containing protein, ENL1-like
343	Os1129	Os43955	0.999997	1.42e-11		Os343	MSTRG.20580.1		MSTRG.13588.8	#N/A	#N/A	#N/A
344	Os1129	Os7471	0.999997	1.45e-11		Os344	A2J10_03T0200500.1		A2J10_10T0152500.1	expressed protein	#N/A	#N/A
345	Os1129	Os39152	0.999997	1.46e-11		Os345	MSTRG.3364.4		MSTRG.14709.4	#N/A	#N/A	#N/A
346	Os1129	Os23294	0.999997	1.47e-11		Os346	A2J10_01T0404100.1		MSTRG.19377.1	#N/A	zinc finger, C3HC4 type domain containing protein, expressed	Zinc finger, RING/FYVE/PHD-type domain containing protein.
347	Os1129	Os1519	0.999997	1.52e-11		Os347	A2J10_03T0392000.2		MSTRG.26689.4	#N/A	#N/A	#N/A
348	Os1129	Os21842	0.999997	1.54e-11		Os348	A2J10_04T0213200.1		MSTRG.12525.2	#N/A	#N/A	#N/A
349	Os1129	Os43781	0.999997	1.55e-11		Os349	A2J10_10T0051100.1		A2J10_10T0065800.1	cytochrome P450, Putative, expressed	cytochrome P450, Putative, expressed	Flavonoid 3'-hydroxylase, Cytochrome P450 75B3, Flavone C-glycosides biosynthesis
350	Os1129	Os43802	0.999997	1.59e-11		Os350	A2J10_01T0278700.1		A2J10_01T0315300.2	Complex I intermediate-associated protein 30 domain containing protein, Putative, expressed	#N/A	#N/A
351	Os3626	Os19329	0.999997	1.6e-11		Os351	MSTRG.11219.4		A2J10_09T0166700.1	FAD dependent oxidoreductase domain containing protein, expressed	#N/A	#N/A
352	Os1129	Os42821	0.999997	1.61e-11		Os352	A2J10_05T0107100.1		A2J10_04T0310200.3	SIT4 phosphatase-associated protein domain containing protein, expressed	#N/A	#N/A
353	Os1129	Os44142	0.999997	1.62e-11		Os353	A2J10_02T0298000.1		A2J10_09T0139900.1	D-mannose binding lectin family protein, expressed	D-mannose binding lectin family protein, expressed	S-Domain receptor like kinase-65, Partial S-domain containing protein, Response to drought and submergence, Target of SUB1A and ERF66 transcription factors, Response to Xanthomonas oryzae pv. oryzae and Rice Stripe Virus
354	Os1129	Os37546	0.999997	1.63e-11		Os354	MSTRG.26083.1		MSTRG.21498.1	#N/A	#N/A	#N/A
355	Os1129	Os43277	0.999997	1.67e-11		Os355	A2J10_01T0335500.1		MSTRG.24751.1	#N/A	#N/A	#N/A
356	Os3626	Os13876	0.999997	1.68e-11		Os356	MSTRG.19671.3		MSTRG.20929.1	#N/A	#N/A	#N/A
357	Os1129	Os34713	0.999997	1.68e-11		Os357	A2J10_11T0019400.1		MSTRG.4283.1	#N/A	#N/A	#N/A
358	Os1129	Os34178	0.999997	1.71e-11		Os358	MSTRG.12567.1		A2J10_01T0413400.1	ankyrin repeat-containing protein, Putative, expressed	ankyrin repeat-containing protein, Putative, expressed	Ankyrin repeat containing protein.
359	Os1129	Os21613	0.999997	1.71e-11		Os359	A2J10_06T0031500.1		MSTRG.14724.1	#N/A	#N/A	#N/A
360	Os1129	Os33742	0.999997	1.72e-11		Os360	MSTRG.25666.1		A2J10_03T0347000.1	CK1_CaseinKinase_1a.4 - CK1 includes the casein kinase 1 kinases, expressed	#N/A	#N/A
361	Os1129	Os41285	0.999997	1.75e-11		Os361	A2J10_01T0254800.1		A2J10_04T0229400.3	Conserved hypothetical protein	#N/A	#N/A
362	Os1129	Os2955	0.999997	1.78e-11		Os362	A2J10_04T0236500.2		MSTRG.3117.5	#N/A	#N/A	#N/A
363	Os1129	Os43654	0.999997	1.82e-11		Os363	A2J10_01T0410300.1		MSTRG.26025.2	#N/A	#N/A	#N/A
364	Os1129	Os43519	0.999996	1.85e-11		Os364	MSTRG.1315.11		MSTRG.17068.3	#N/A	#N/A	#N/A
365	Os1129	Os25235	0.999996	1.87e-11		Os365	A2J10_11T0159700.1		MSTRG.20997.3	#N/A	#N/A	#N/A
366	Os1129	Os43807	0.999996	1.88e-11		Os366	A2J10_09T0140500.1		MSTRG.13868.2	#N/A	#N/A	#N/A
367	Os1129	Os24177	0.999996	1.9e-11		Os367	A2J10_11T0133800.1		MSTRG.23095.1	#N/A	S-domain receptor-like protein kinase, Putative, expressed	S-Domain receptor like kinase-41
368	Os1129	Os43167	0.999996	1.91e-11		Os368	A2J10_12T0191900.1		A2J10_06T0181700.1	peroxidase precursor, Putative, expressed	peroxidase precursor, Putative, expressed	Haem peroxidase family protein.
369	Os1129	Os40115	0.999996	1.94e-11		Os369	A2J10_06T0182300.2		A2J10_06T0113500.1	cytochrome P450, Putative, expressed	cytochrome P450, Putative, expressed	Cytochrome P450 family protein.
370	Os3626	Os27036	0.999996	1.96e-11		Os370	A2J10_10T0134100.1		MSTRG.119.7	#N/A	#N/A	#N/A
371	Os5130	Os8507	0.999996	1.97e-11		Os371	A2J10_07T0251700.1		MSTRG.3971.7	#N/A	#N/A	#N/A
372	Os1129	Os18613	0.999996	2.02e-11		Os372	A2J10_11T0072800.1		A2J10_07T0125600.1	CDGSH iron sulfur domain-containing protein 1, Putative, expressed	#N/A	#N/A
373	Os1129	Os42567	0.999996	2.03e-11		Os373	MSTRG.732.5		A2J10_01T0032400.1	expressed protein	#N/A	#N/A
374	Os1129	Os38876	0.999996	2.03e-11		Os374	A2J10_01T0017300.1		A2J10_11T0212700.1	FRA10AC1, Putative, expressed	FRA10AC1, Putative, expressed	Similar to Phyb1.
375	Os1129	Os27401	0.999996	2.06e-11		Os375	A2J10_08T0135700.1		A2J10_12T0191700.1	purple acid phosphatase precursor, Putative, expressed	#N/A	Similar to Purple acid phosphatase (EC 3.1.3.2) (Fragment).
376	Os1129	Os13807	0.999996	2.08e-11		Os376	A2J10_07T0261100.1		MSTRG.21049.3	#N/A	#N/A	#N/A
377	Os3626	Os4010	0.999996	2.13e-11		Os377	A2J10_01T0020500.1		MSTRG.157.5	#N/A	#N/A	#N/A
378	Os1129	Os38697	0.999996	2.13e-11		Os378	A2J10_03T0184000.2		A2J10_02T0045200.3	Conserved hypothetical protein	#N/A	Hypothetical protein.
379	Os1129	Os25492	0.999996	2.23e-11		Os379	A2J10_05T0120200.2		A2J10_04T0211700.1	zinc finger, C3HC4 type domain containing protein, expressed	zinc finger, C3HC4 type domain containing protein, expressed	Zinc finger, RING/FYVE/PHD-type domain containing protein.
380	Os5130	Os38781	0.999996	2.25e-11		Os380	A2J10_04T0199700.2		MSTRG.17875.2	#N/A	#N/A	#N/A
381	Os3626	Os25007	0.999996	2.29e-11		Os381	MSTRG.6386.1		MSTRG.21224.1	#N/A	#N/A	#N/A
382	Os1129	Os22584	0.999996	2.3e-11		Os382	A2J10_02T0387300.1		MSTRG.5397.1	#N/A	#N/A	#N/A
383	Os1129	Os18328	0.999996	2.42e-11		Os383	A2J10_03T0323500.1		A2J10_06T0292300.1	ubiquitin interaction motif family protein, expressed	ubiquitin interaction motif family protein, expressed	Protein of unknown function DUF544 family protein.
384	Os1129	Os40520	0.999996	2.43e-11		Os384	A2J10_03T0049800.1		MSTRG.18096.5	#N/A	#N/A	#N/A
385	Os3626	Os30254	0.999996	2.46e-11		Os385	A2J10_09T0019800.1		A2J10_07T0266400.1	choline transporter-related, Putative, expressed	#N/A	#N/A
386	Os1129	Os43400	0.999996	2.46e-11		Os386	A2J10_06T0110400.1		A2J10_09T0141900.1	cytochrome P450, Putative, expressed	#N/A	Hypothetical protein.
387	Os5130	Os42472	0.999996	2.53e-11		Os387	A2J10_03T0138800.1		A2J10_08T0152100.1	ZF-HD protein dimerisation region containing protein, expressed	#N/A	#N/A
388	Os3626	Os42852	0.999996	2.55e-11		Os388	MSTRG.16837.1		A2J10_05T0028200.1	bifunctional protein folD, Putative, expressed	bifunctional protein folD, Putative, expressed	Similar to Plastid 5,10-methylene-tetrahydrofolate dehydrogenase (Fragment).
389	Os3626	Os43114	0.999996	2.58e-11		Os389	A2J10_03T0001600.1		MSTRG.24717.3	#N/A	#N/A	#N/A
390	Os1129	Os43148	0.999996	2.58e-11		Os390	A2J10_10T0114300.2		A2J10_01T0313300.6	expressed protein	#N/A	#N/A
391	Os1129	Os44232	0.999996	2.6e-11		Os391	MSTRG.21423.1		A2J10_05T0053900.1	Hypothetical protein	#N/A	#N/A
392	Os1129	Os43409	0.999996	2.61e-11		Os392	A2J10_04T0093500.1		MSTRG.25271.1	#N/A	glycosyl hydrolases family 17, Putative, expressed	Similar to Glucan endo-1,3-beta-glucosidase GII precursor (EC 3.2.1.39) ((1->3)- beta-glucan endohydrolase GII) ((1->3)-beta-glucanase isoenzyme GII) (Beta-1,3-endoglucanase GII).
393	Os1129	Os38484	0.999996	2.66e-11		Os393	A2J10_06T0200800.1		A2J10_12T0011700.1	expressed protein	expressed protein	Conserved hypothetical protein.
394	Os28327	Os28459	0.999996	2.69e-11		Os394	A2J10_12T0053900.1		A2J10_04T0188900.1	Conserved hypothetical protein	#N/A	#N/A
395	Os1129	Os44218	0.999996	2.75e-11		Os395	A2J10_09T0057700.1		A2J10_01T0307800.1	glycosyl hydrolases family 17, Putative, expressed	#N/A	#N/A
396	Os1129	Os29077	0.999996	2.76e-11		Os396	MSTRG.13027.1		A2J10_06T0099400.1	Conserved hypothetical protein	#N/A	#N/A
397	Os1129	Os39748	0.999996	2.76e-11		Os397	A2J10_10T0161300.1		MSTRG.6046.3	#N/A	#N/A	#N/A
398	Os1129	Os42856	0.999996	2.79e-11		Os398	A2J10_02T0004000.1		MSTRG.16261.1	#N/A	NAD dependent epimerase/dehydratase family protein, Putative, expressed	GDP-D-mannose epimerase 1, Ascorbate biosynthesis, Tolerance against ozone stress and Zn deficiency, Plant development
399	Os1129	Os42871	0.999996	2.85e-11		Os399	A2J10_03T0355200.1		MSTRG.26419.3	#N/A	#N/A	#N/A
400	Os1129	Os44177	0.999996	2.86e-11		Os400	A2J10_04T0279000.1		MSTRG.23157.7	#N/A	#N/A	#N/A
401	Os3626	Os3689	0.999996	2.88e-11		Os401	A2J10_08T0170500.1		A2J10_01T0095900.1	Putative WD domain, G-beta repeat domain containing protein, expressed	WD domain, G-beta repeat domain containing protein, expressed	Hypothetical gene.
402	Os1129	Os43468	0.999996	2.92e-11		Os402	MSTRG.26082.1		MSTRG.8102.1	#N/A	RNA recognition motif containing protein, Putative, expressed	Nucleotide-binding, alpha-beta plait domain containing protein.
403	Os1129	Os25424	0.999996	2.92e-11		Os403	MSTRG.9413.1		A2J10_05T0045700.2	zinc finger family protein, Putative, expressed	#N/A	#N/A
404	Os3626	Os32884	0.999996	2.94e-11		Os404	A2J10_03T0139400.2		MSTRG.201.1	#N/A	C2 domain containing protein, Putative, expressed	Similar to plant synaptotagmin.
405	Os1129	Os25982	0.999996	3e-11		Os405	A2J10_12T0194500.5		A2J10_01T0004200.4	pex14, Putative, expressed	#N/A	#N/A
406	Os1129	Os43300	0.999995	3.05e-11		Os406	A2J10_12T0186700.1		MSTRG.21886.3	#N/A	#N/A	#N/A
407	Os28327	Os43851	0.999995	3.06e-11		Os407	A2J10_06T0139600.1		MSTRG.23953.3	#N/A	#N/A	#N/A
408	Os3626	Os37294	0.999995	3.06e-11		Os408	MSTRG.11004.1		A2J10_02T0078100.1	Conserved hypothetical protein	#N/A	#N/A
409	Os3626	Os43756	0.999995	3.06e-11		Os409	A2J10_03T0095600.1		MSTRG.17774.4	#N/A	#N/A	#N/A
410	Os3626	Os25115	0.999995	3.06e-11		Os410	A2J10_01T0494000.1		MSTRG.14265.2	#N/A	#N/A	#N/A
411	Os3626	Os31651	0.999995	3.07e-11		Os411	MSTRG.22992.6		MSTRG.4990.8	#N/A	#N/A	#N/A
412	Os3626	Os21583	0.999995	3.07e-11		Os412	A2J10_02T0201600.1		MSTRG.9044.1	#N/A	UDP-glucoronosyl and UDP-glucosyl transferase domain containing protein, expressed	Hypothetical protein.
413	Os3626	Os43847	0.999995	3.07e-11		Os413	MSTRG.23045.1		A2J10_02T0309900.1	expressed protein	#N/A	#N/A
414	Os3626	Os40778	0.999995	3.08e-11		Os414	MSTRG.5327.1		A2J10_01T0506000.3	pentatricopeptide, Putative, expressed	#N/A	#N/A
415	Os3626	Os43729	0.999995	3.08e-11		Os415	A2J10_04T0212600.1		A2J10_08T0122400.1	Conserved hypothetical protein	#N/A	#N/A
416	Os1129	Os43779	0.999995	3.09e-11		Os416	A2J10_02T0327300.1		A2J10_06T0250400.1	AMP-binding domain containing protein, expressed	AMP-binding domain containing protein, expressed	4-coumarate:coenzyme A ligase, Lignin biosynthesis, Defense against wounding
417	Os3626	Os28510	0.999995	3.1e-11		Os417	A2J10_09T0104300.1		A2J10_01T0483100.1	Ser/Thr protein phosphatase family protein, Putative, expressed	#N/A	#N/A
418	Os3626	Os43875	0.999995	3.11e-11		Os418	A2J10_01T0346900.1		MSTRG.7577.1	#N/A	aminotransferase, Putative, expressed	Similar to SufS.
419	Os3626	Os43861	0.999995	3.12e-11		Os419	MSTRG.6006.1		A2J10_05T0102800.1	OsCML21 - Calmodulin-related calcium sensor protein, expressed	OsCML21 - Calmodulin-related calcium sensor protein, expressed	EF-Hand type domain containing protein.
420	Os3626	Os24941	0.999995	3.12e-11		Os420	A2J10_07T0049700.1		MSTRG.72.1	#N/A	transcriptional repressor, Putative, expressed	Similar to Paired amphipathic helix repeat-containing protein / transcription regulator-related.
421	Os3626	Os25447	0.999995	3.12e-11		Os421	MSTRG.16267.4		A2J10_03T0083500.1	cysteine-rich repeat secretory protein 55 precursor, Putative, expressed	cysteine-rich repeat secretory protein 55 precursor, Putative, expressed	Similar to (clone wusl1032) mRNA sequence.
422	Os3626	Os28211	0.999995	3.14e-11		Os422	A2J10_01T0079200.3		MSTRG.10446.1	#N/A	#N/A	#N/A
423	Os3626	Os21576	0.999995	3.14e-11		Os423	A2J10_07T0067900.1		A2J10_07T0196100.1	Conserved hypothetical protein	#N/A	#N/A
424	Os3626	Os39187	0.999995	3.14e-11		Os424	MSTRG.20032.5		A2J10_05T0250700.1	proteasome-related, Putative, expressed	proteasome-related, Putative, expressed	Armadillo-type fold domain containing protein.
425	Os3626	Os43820	0.999995	3.16e-11		Os425	A2J10_01T0076900.1		MSTRG.21693.5	#N/A	#N/A	#N/A
426	Os3626	Os43760	0.999995	3.17e-11		Os426	A2J10_02T0331200.1		A2J10_01T0072600.1	expressed protein	#N/A	#N/A
427	Os1129	Os13360	0.999995	3.18e-11		Os427	A2J10_02T0102300.1		A2J10_05T0112400.4	expressed protein	#N/A	#N/A
428	Os4820	Os34534	0.999995	3.2e-11		Os428	MSTRG.16690.2		MSTRG.3898.1	#N/A	#N/A	#N/A
429	Os3626	Os25380	0.999995	3.21e-11		Os429	MSTRG.2078.1		MSTRG.7829.4	#N/A	#N/A	#N/A
430	Os3626	Os25377	0.999995	3.23e-11		Os430	A2J10_05T0150800.1		MSTRG.8964.4	#N/A	#N/A	#N/A
431	Os1129	Os43230	0.999995	3.23e-11		Os431	A2J10_06T0188200.1		MSTRG.8654.3	#N/A	#N/A	#N/A
432	Os3626	Os42676	0.999995	3.25e-11		Os432	A2J10_11T0192700.1		A2J10_05T0096700.1	expressed protein	expressed protein	Ankyrin repeat containing protein.
433	Os3626	Os43143	0.999995	3.25e-11		Os433	MSTRG.8883.1		MSTRG.17616.1	#N/A	TKL_IRAK_DUF26-ld.3 - DUF26 kinases have homology to DUF26 containing loci, expressed	#N/A
434	Os1129	Os22628	0.999995	3.27e-11		Os434	A2J10_11T0115000.4		MSTRG.20734.6	#N/A	#N/A	#N/A
435	Os1129	Os31636	0.999995	3.28e-11		Os435	A2J10_02T0313200.3		MSTRG.17059.9	#N/A	#N/A	#N/A
436	Os3626	Os25502	0.999995	3.28e-11		Os436	A2J10_02T0260300.1		A2J10_02T0242400.1	Regulator of chromosome condensation domain containing protein, expressed	#N/A	#N/A
437	Os3626	Os40256	0.999995	3.29e-11		Os437	A2J10_06T0032500.1		A2J10_11T0152200.1	Putative OsFBX423 - F-box domain containing protein, expressed	OsFBX423 - F-box domain containing protein, expressed	Mitochondrial citrate synthase, Aluminum tolerance
438	Os3626	Os37544	0.999995	3.31e-11		Os438	MSTRG.14830.1		A2J10_07T0047300.1	nodulin, Putative, expressed	#N/A	#N/A
439	Os3626	Os40498	0.999995	3.32e-11		Os439	MSTRG.8895.3		A2J10_02T0068800.2	DUF1680 domain containing protein, Putative, expressed	#N/A	#N/A
440	Os3626	Os38033	0.999995	3.32e-11		Os440	MSTRG.8509.1		A2J10_01T0269400.1	serine esterase, Putative, expressed	#N/A	#N/A
441	Os1129	Os9229	0.999995	3.32e-11		Os441	MSTRG.25380.3		MSTRG.5769.3	#N/A	#N/A	#N/A
442	Os1129	Os23170	0.999995	3.34e-11		Os442	MSTRG.11855.1		A2J10_06T0007000.6	PPR repeat domain containing protein, Putative, expressed	#N/A	#N/A
443	Os1129	Os38166	0.999995	3.35e-11		Os443	A2J10_01T0047900.1		A2J10_01T0252700.1	Putative expressed protein	#N/A	#N/A
444	Os3626	Os43594	0.999995	3.35e-11		Os444	MSTRG.14333.2		A2J10_08T0058200.1	SHR5-receptor-like kinase, Putative, expressed	SHR5-receptor-like kinase, Putative, expressed	Hypothetical conserved gene.
445	Os3626	Os37977	0.999995	3.36e-11		Os445	A2J10_10T0178700.1		A2J10_03T0377900.3	ZOS3-24 - C2H2 zinc finger protein, expressed	#N/A	#N/A
446	Os3626	Os25222	0.999995	3.37e-11		Os446	A2J10_03T0092300.1		A2J10_05T0152300.1	cytochrome P450 72A1, Putative, expressed	#N/A	#N/A
447	Os1129	Os43694	0.999995	3.37e-11		Os447	A2J10_08T0013300.1		A2J10_11T0023400.1	calmodulin-like protein 1, Putative, expressed	calmodulin-like protein 1, Putative, expressed	Similar to EF hand family protein, expressed.
448	Os1129	Os28491	0.999995	3.37e-11		Os448	A2J10_04T0289400.1		A2J10_10T0105300.3	protein kinase domain containing protein, expressed	#N/A	#N/A
449	Os3626	Os43720	0.999995	3.41e-11		Os449	A2J10_02T0062700.1		A2J10_09T0090300.3	Conserved hypothetical protein	#N/A	#N/A
450	Os3626	Os42903	0.999995	3.41e-11		Os450	A2J10_12T0131800.4		A2J10_02T0142300.1	Putative expressed protein	#N/A	#N/A
451	Os1129	Os4772	0.999995	3.42e-11		Os451	A2J10_03T0133800.1		MSTRG.5253.1	#N/A	AP2 domain containing protein, expressed	#N/A
452	Os1129	Os2365	0.999995	3.43e-11		Os452	A2J10_03T0149500.1		MSTRG.4127.1	#N/A	#N/A	#N/A
453	Os1129	Os20123	0.999995	3.43e-11		Os453	MSTRG.23762.1		A2J10_05T0267400.1	WRKY8, expressed	#N/A	#N/A
454	Os1129	Os43956	0.999995	3.45e-11		Os454	A2J10_09T0196600.1		MSTRG.17178.2	#N/A	#N/A	#N/A
455	Os3626	Os43747	0.999995	3.46e-11		Os455	MSTRG.12594.1		A2J10_06T0291200.1	transferase family protein, Putative, expressed	transferase family protein, Putative, expressed	Similar to Benzoyl coenzyme A: benzyl alcohol benzoyl transferase (Benzoyl- CoA:benzyl alcohol/phenylethanol benzoyltransferase).
456	Os3626	Os21980	0.999995	3.47e-11		Os456	MSTRG.14757.6		A2J10_02T0189800.1	ribosomal protein L29, Putative, expressed	ribosomal protein L29, Putative, expressed	Similar to 60S ribosomal protein L35.
457	Os3626	Os43824	0.999995	3.49e-11		Os457	A2J10_01T0303900.1		MSTRG.14475.2	#N/A	#N/A	#N/A
458	Os1129	Os44153	0.999995	3.49e-11		Os458	A2J10_02T0230900.1		A2J10_12T0145700.8	domain of unknown function family protein, expressed	#N/A	#N/A
459	Os1129	Os33529	0.999995	3.53e-11		Os459	A2J10_03T0037600.1		A2J10_02T0261600.1	chloroplast 50S ribosomal protein L16, Putative, expressed	#N/A	#N/A
460	Os3626	Os40354	0.999995	3.53e-11		Os460	MSTRG.6954.1		A2J10_02T0218400.2	resistance protein, Putative, expressed	resistance protein, Putative, expressed	#N/A
461	Os3626	Os43808	0.999995	3.53e-11		Os461	A2J10_06T0154800.1		MSTRG.1930.2	#N/A	#N/A	#N/A
462	Os3626	Os42442	0.999995	3.54e-11		Os462	MSTRG.6063.1		A2J10_04T0179400.1	amino acid kinase, Putative, expressed	#N/A	#N/A
463	Os1129	Os25741	0.999995	3.54e-11		Os463	A2J10_12T0189600.1		A2J10_05T0169000.6	cation efflux family protein, Putative, expressed	#N/A	#N/A
464	Os1129	Os38789	0.999995	3.59e-11		Os464	A2J10_12T0141600.1		A2J10_07T0222100.5	zinc finger, C3HC4 type domain containing protein, expressed	#N/A	#N/A
465	Os3626	Os43829	0.999995	3.6e-11		Os465	A2J10_03T0342700.1		A2J10_05T0209200.2	ethylene-responsive protein related, Putative, expressed	#N/A	#N/A
466	Os3626	Os32094	0.999995	3.61e-11		Os466	MSTRG.8260.1		MSTRG.14707.1	#N/A	#N/A	#N/A
467	Os3626	Os42712	0.999995	3.62e-11		Os467	A2J10_09T0121200.3		A2J10_06T0010400.1	Putative expressed protein	#N/A	#N/A
468	Os1129	Os2936	0.999995	3.63e-11		Os468	A2J10_06T0201700.2		MSTRG.15561.5	#N/A	#N/A	#N/A
469	Os3626	Os18007	0.999995	3.63e-11		Os469	A2J10_12T0019600.1		A2J10_11T0016800.2	alpha-N-arabinofuranosidase A, Putative, expressed	#N/A	#N/A
470	Os1129	Os42519	0.999995	3.64e-11		Os470	MSTRG.11853.1		MSTRG.6648.9	#N/A	#N/A	#N/A
471	Os3626	Os42845	0.999995	3.65e-11		Os471	A2J10_05T0027100.1		A2J10_07T0195900.2	insulin-degrading enzyme, Putative, expressed	#N/A	#N/A
472	Os3626	Os43617	0.999995	3.68e-11		Os472	A2J10_09T0161000.1		MSTRG.3202.10	#N/A	#N/A	#N/A
473	Os1129	Os39754	0.999995	3.69e-11		Os473	MSTRG.4664.1		MSTRG.683.2	#N/A	#N/A	#N/A
474	Os3626	Os40705	0.999995	3.74e-11		Os474	A2J10_05T0266800.3		A2J10_11T0100000.1	expressed protein	expressed protein	Protein kinase, catalytic domain domain containing protein.
475	Os3626	Os28588	0.999995	3.75e-11		Os475	A2J10_07T0227200.1		MSTRG.458.1	#N/A	expressed protein	Kv1.4 voltage-gated K+ channel family protein.
476	Os3626	Os37233	0.999995	3.75e-11		Os476	A2J10_07T0008300.1		A2J10_06T0004500.1	polygalacturonase, Putative, expressed	polygalacturonase, Putative, expressed	Similar to glycoside hydrolase, family 28.
477	Os1129	Os35469	0.999995	3.83e-11		Os477	MSTRG.18227.2		A2J10_10T0108600.1	sodium/calcium exchanger protein, Putative, expressed	sodium/calcium exchanger protein, Putative, expressed	Sodium/calcium exchanger membrane region domain containing protein.
478	Os3626	Os25595	0.999995	3.86e-11		Os478	A2J10_04T0062500.1		MSTRG.12887.1	#N/A	expressed protein	Conserved hypothetical protein.
479	Os1129	Os44136	0.999995	3.88e-11		Os479	MSTRG.15858.2		MSTRG.12293.1	#N/A	microtubule associated protein, Putative, expressed	Similar to ATMAP65-6; microtubule binding.
480	Os1129	Os28279	0.999995	3.89e-11		Os480	A2J10_07T0186900.1		A2J10_12T0162500.1	expressed protein	Putative expressed protein	#N/A
481	Os1129	Os21787	0.999995	3.89e-11		Os481	A2J10_06T0243500.1		MSTRG.12751.6	#N/A	#N/A	#N/A
482	Os1129	Os43430	0.999995	3.9e-11		Os482	A2J10_02T0032900.1		A2J10_04T0139300.1	STRUBBELIG-RECEPTOR FAMILY 8 precursor, Putative, expressed	STRUBBELIG-RECEPTOR FAMILY 8 precursor, Putative, expressed	Protein kinase-like domain domain containing protein.
483	Os25570	Os37371	0.999995	3.93e-11		Os483	MSTRG.3260.1		A2J10_03T0388600.1	NFD2, Putative, expressed	NFD2, Putative, expressed	Ribonuclease III domain containing protein.
484	Os5130	Os27036	0.999995	3.94e-11		Os484	A2J10_04T0231000.1		A2J10_04T0216600.1	purine permease, Putative, expressed	purine permease, Putative, expressed	Protein of unknown function DUF250 domain containing protein.
485	Os3626	Os5585	0.999995	3.96e-11		Os485	A2J10_08T0152900.1		A2J10_03T0014400.1	B3 DNA binding domain containing protein, expressed	#N/A	#N/A
486	Os3626	Os39189	0.999995	3.96e-11		Os486	MSTRG.13958.4		MSTRG.1904.1	#N/A	#N/A	#N/A
487	Os3626	Os42487	0.999995	3.97e-11		Os487	MSTRG.15276.3		A2J10_04T0240500.1	Putative OsSAUR21 - Auxin-responsive SAUR gene family member, expressed	OsSAUR21 - Auxin-responsive SAUR gene family member, expressed	Similar to H0313F03.1 protein.
488	Os3626	Os37694	0.999995	3.98e-11		Os488	A2J10_03T0213800.1		MSTRG.20104.4	#N/A	#N/A	#N/A
489	Os1129	Os11869	0.999995	3.99e-11		Os489	A2J10_03T0395900.1		A2J10_01T0479300.1	expressed protein	expressed protein	Conserved hypothetical protein.
490	Os1129	Os36055	0.999995	4e-11		Os490	A2J10_01T0286900.1		A2J10_10T0167300.1	CHIT14 - Chitinase family protein precursor, expressed	#N/A	#N/A
491	Os1129	Os22524	0.999995	4.01e-11		Os491	MSTRG.18159.1		A2J10_03T0263300.1	Conserved hypothetical protein	#N/A	#N/A
492	Os1129	Os11862	0.999995	4.02e-11		Os492	A2J10_04T0295500.1		MSTRG.3990.1	#N/A	peroxidase precursor, Putative, expressed	Similar to Peroxidase (EC 1.11.1.7).
493	Os3626	Os25080	0.999995	4.02e-11		Os493	MSTRG.6543.1		MSTRG.11205.7	#N/A	#N/A	#N/A
494	Os3626	Os31964	0.999995	4.05e-11		Os494	A2J10_03T0284800.2		A2J10_10T0168700.1	protein phosphatase 2C, Putative, expressed	protein phosphatase 2C, Putative, expressed	Similar to Protein phosphatase 2C-like protein.
495	Os3626	Os43546	0.999995	4.07e-11		Os495	A2J10_02T0299900.1		A2J10_07T0178500.1	TKL_IRAK_DUF26-lc.18 - DUF26 kinases have homology to DUF26 containing loci, expressed	#N/A	#N/A
496	Os3626	Os22352	0.999995	4.08e-11		Os496	MSTRG.1608.1		MSTRG.24468.1	#N/A	SHR5-receptor-like kinase, Putative, expressed	Similar to H0525G02.11 protein.
497	Os3626	Os39974	0.999995	4.13e-11		Os497	MSTRG.24293.1		MSTRG.17179.3	#N/A	#N/A	#N/A
498	Os3626	Os42916	0.999995	4.19e-11		Os498	MSTRG.6340.2		MSTRG.13247.2	#N/A	#N/A	#N/A
499	Os3626	Os40969	0.999995	4.25e-11		Os499	MSTRG.14332.2		A2J10_05T0183200.1	aminotransferase, Putative, expressed	#N/A	#N/A
500	Os1129	Os29042	0.999995	4.27e-11		Os500	A2J10_06T0262700.1		MSTRG.11559.8	#N/A	#N/A	#N/A
501	Os28327	Os43788	0.999995	4.36e-11		Os501	A2J10_10T0123300.1		MSTRG.17163.1	#N/A	peroxidase precursor, Putative, expressed	Peroxidase (EC 1.11.1.7).
502	Os3626	Os43078	0.999995	4.36e-11		Os502	A2J10_05T0002400.1		A2J10_03T0386400.3	frigida, Putative, expressed	#N/A	#N/A
503	Os1129	Os42553	0.999995	4.41e-11		Os503	A2J10_04T0125500.1		A2J10_07T0017300.1	Putative SCP-like extracellular protein, expressed	SCP-like extracellular protein, expressed	#N/A
504	Os1129	Os31267	0.999995	4.5e-11		Os504	A2J10_01T0432600.1		MSTRG.19537.2	#N/A	#N/A	Hypothetical gene.
505	Os3626	Os25679	0.999995	4.52e-11		Os505	A2J10_05T0242400.1		MSTRG.16750.10	#N/A	#N/A	#N/A
506	Os3626	Os25644	0.999995	4.52e-11		Os506	MSTRG.9558.1		MSTRG.1284.5	#N/A	#N/A	#N/A
507	Os3626	Os43838	0.999995	4.53e-11		Os507	MSTRG.21926.4		A2J10_02T0024800.1	expressed protein	expressed protein	Conserved hypothetical protein.
508	Os28327	Os28780	0.999995	4.53e-11		Os508	MSTRG.7578.1		MSTRG.25273.1	#N/A	glycosyl hydrolases family 17, Putative, expressed	Similar to Beta-glucanase.
509	Os3626	Os37264	0.999994	4.54e-11		Os509	MSTRG.20700.1		MSTRG.11334.5	#N/A	#N/A	#N/A
510	Os1129	Os29896	0.999994	4.57e-11		Os510	MSTRG.27051.2		A2J10_04T0172100.1	Conserved hypothetical protein	#N/A	#N/A
511	Os1129	Os38410	0.999994	4.58e-11		Os511	MSTRG.12728.2		MSTRG.10325.5	#N/A	#N/A	#N/A
512	Os3626	Os39136	0.999994	4.61e-11		Os512	A2J10_07T0279800.1		MSTRG.22178.1	#N/A	Conserved hypothetical protein	ATPase, AAA-type, core domain containing protein.
513	Os1129	Os43727	0.999994	4.67e-11		Os513	MSTRG.10907.4		MSTRG.4675.2	#N/A	#N/A	#N/A
514	Os3626	Os25237	0.999994	4.74e-11		Os514	A2J10_05T0115300.1		A2J10_01T0108300.1	Conserved hypothetical protein	#N/A	#N/A
515	Os3626	Os42891	0.999994	4.77e-11		Os515	A2J10_04T0240100.2		A2J10_07T0286300.1	WRKY47, expressed	WRKY47, expressed	WRKY transcription factor, Drought tolerance
516	Os1129	Os42055	0.999994	4.8e-11		Os516	A2J10_02T0173200.1		A2J10_06T0207200.1	Conserved hypothetical protein	#N/A	#N/A
517	Os3626	Os19313	0.999994	4.81e-11		Os517	MSTRG.11007.1		A2J10_04T0076800.1	RIPER2 - Ripening-related family protein precursor, expressed	RIPER2 - Ripening-related family protein precursor, expressed	Barwin-related endoglucanase domain containing protein.
518	Os3626	Os43596	0.999994	4.88e-11		Os518	MSTRG.3919.1		A2J10_04T0289000.3	CAF1 family ribonuclease containing protein, Putative, expressed	#N/A	#N/A
519	Os3626	Os25488	0.999994	4.91e-11		Os519	A2J10_04T0119900.1		MSTRG.22700.4	#N/A	#N/A	#N/A
520	Os1129	Os42882	0.999994	4.91e-11		Os520	MSTRG.17698.1		A2J10_01T0315900.4	Putative expressed protein	Putative expressed protein	Conserved hypothetical protein.
521	Os1129	Os7288	0.999994	4.91e-11		Os521	A2J10_01T0179500.1		A2J10_11T0237100.1	glycosyl hydrolase, Putative, expressed	glycosyl hydrolase, Putative, expressed	Similar to Class III chitinase homologue (OsChib3H-h) (Fragment).
522	Os3626	Os37270	0.999994	4.95e-11		Os522	MSTRG.2965.1		MSTRG.18297.1	#N/A	ubiquitin family protein, Putative, expressed	Pentatricopeptide repeat containing protein.
523	Os3626	Os43666	0.999994	5.01e-11		Os523	A2J10_11T0043200.1		MSTRG.20583.2	#N/A	#N/A	#N/A
524	Os5130	Os23760	0.999994	5.06e-11		Os524	A2J10_11T0001300.3		A2J10_03T0359400.1	protein Kinase-associated protein phosphatase, Putative, expressed	protein Kinase-associated protein phosphatase, Putative, expressed	Similar to Kinase associated protein phosphatase.
525	Os1129	Os25549	0.999994	5.1e-11		Os525	A2J10_03T0160000.2		A2J10_04T0324400.1	POT family protein, expressed	POT family protein, expressed	Similar to POT family protein.
526	Os1129	Os43487	0.999994	5.11e-11		Os526	A2J10_02T0198400.1		A2J10_07T0248500.1	EF hand family protein, Putative, expressed	EF hand family protein, Putative, expressed	EF-Hand type domain containing protein.
527	Os1129	Os41230	0.999994	5.11e-11		Os527	A2J10_02T0055500.1		A2J10_08T0197000.1	cytochrome P450, Putative, expressed	#N/A	#N/A
528	Os1129	Os25547	0.999994	5.14e-11		Os528	A2J10_02T0027000.1		A2J10_11T0188000.1	Putative CHIT17 - Chitinase family protein precursor, expressed	#N/A	#N/A
529	Os3626	Os43763	0.999994	5.15e-11		Os529	A2J10_02T0207300.2		A2J10_07T0222100.1	zinc finger, C3HC4 type domain containing protein, expressed	zinc finger, C3HC4 type domain containing protein, expressed	Similar to H0818E04.19 protein.
530	Os1129	Os36903	0.999994	5.16e-11		Os530	A2J10_05T0048400.1		A2J10_11T0184400.1	ABC transporter, ATP-binding protein, Putative, expressed	#N/A	#N/A
531	Os3626	Os43758	0.999994	5.19e-11		Os531	A2J10_11T0160300.1		A2J10_07T0194200.2	homeodomain-like, Putative, expressed	homeodomain-like, Putative, expressed	Homeodomain-related containing protein.
532	Os3626	Os32002	0.999994	5.19e-11		Os532	MSTRG.14873.1		A2J10_01T0298600.1	glycosyl hydrolase, Putative, expressed	glycosyl hydrolase, Putative, expressed	Similar to Chitinase (EC 3.2.1.14).
533	Os1129	Os44067	0.999994	5.26e-11		Os533	A2J10_11T0137700.1		MSTRG.16074.2	#N/A	#N/A	#N/A
534	Os3626	Os42816	0.999994	5.27e-11		Os534	A2J10_02T0062800.1		A2J10_06T0022500.4	Putative transferase family domain containing protein, expressed	#N/A	#N/A
535	Os1129	Os40034	0.999994	5.32e-11		Os535	A2J10_07T0162100.3		A2J10_08T0077200.1	proline rich protein 3, Putative, expressed	proline rich protein 3, Putative, expressed	Hypothetical protein.
536	Os3626	Os42759	0.999994	5.34e-11		Os536	MSTRG.23917.1		MSTRG.19635.1	#N/A	#N/A	#N/A
537	Os3626	Os32251	0.999994	5.37e-11		Os537	A2J10_08T0098500.1		A2J10_05T0142600.1	aspartyl protease family protein, Putative, expressed	#N/A	#N/A
538	Os1129	Os28886	0.999994	5.4e-11		Os538	A2J10_06T0088100.1		A2J10_08T0175700.1	expressed protein	expressed protein	Conserved hypothetical protein.
539	Os3626	Os28662	0.999994	5.43e-11		Os539	A2J10_05T0072700.1		MSTRG.26738.4	#N/A	#N/A	Similar to isoamylase-type starch debranching enzyme ISO3.
540	Os3626	Os25340	0.999994	5.54e-11		Os540	A2J10_03T0276600.2		MSTRG.6534.6	#N/A	#N/A	#N/A
541	Os3626	Os25117	0.999994	5.61e-11		Os541	MSTRG.17137.1		MSTRG.494.4	#N/A	#N/A	#N/A
542	Os1129	Os42300	0.999994	5.62e-11		Os542	A2J10_01T0105700.1		A2J10_01T0315700.1	Putative expressed protein	#N/A	#N/A
543	Os3626	Os17602	0.999994	5.68e-11		Os543	MSTRG.10519.1		A2J10_08T0230700.1	transmembrane 9 superfamily member, Putative, expressed	transmembrane 9 superfamily member, Putative, expressed	#N/A
544	Os1129	Os3396	0.999994	5.68e-11		Os544	A2J10_01T0352700.1		A2J10_04T0146600.1	methyladenine glycosylase, Putative, expressed	methyladenine glycosylase, Putative, expressed	Similar to H0311C03.4 protein.
545	Os3626	Os43868	0.999994	5.72e-11		Os545	MSTRG.17324.1		A2J10_03T0184900.1	sterol-4-alpha-carboxylate 3-dehydrogenase, decarboxylating, Putative, expressed	#N/A	#N/A
546	Os1129	Os43316	0.999994	5.72e-11		Os546	MSTRG.14196.16		A2J10_06T0236000.4	Putative hydrolase, NUDIX family, domain containing protein, expressed	#N/A	#N/A
547	Os5130	Os34756	0.999994	5.79e-11		Os547	A2J10_11T0025600.1		A2J10_02T0127400.1	60S ribosomal protein L27-3, Putative, expressed	#N/A	#N/A
548	Os3626	Os32200	0.999994	5.81e-11		Os548	A2J10_06T0033400.1		MSTRG.17167.6	#N/A	#N/A	#N/A
549	Os3626	Os25154	0.999994	5.83e-11		Os549	A2J10_05T0087600.1		MSTRG.4774.2	#N/A	#N/A	#N/A
550	Os3626	Os42754	0.999994	5.83e-11		Os550	A2J10_03T0054600.1		A2J10_11T0058100.5	Putative OsFBX411 - F-box domain containing protein, expressed	OsFBX409 - F-box domain containing protein, expressed	Cyclin-like F-box domain containing protein.
551	Os1129	Os33372	0.999994	5.85e-11		Os551	A2J10_03T0301400.4		A2J10_07T0191500.2	AMP-binding enzyme, Putative, expressed	#N/A	#N/A
552	Os5130	Os38798	0.999994	5.93e-11		Os552	MSTRG.4714.2		MSTRG.24586.1	#N/A	DC1 domain, Putative, expressed	#N/A
553	Os3626	Os43813	0.999994	5.94e-11		Os553	MSTRG.15858.1		A2J10_02T0034400.1	CCT motif family protein, expressed	CCT motif family protein, expressed	CCT domain containing protein.
554	Os3626	Os43786	0.999994	5.94e-11		Os554	MSTRG.15559.1		A2J10_04T0054900.1	protein kinase, Putative, expressed	protein kinase, Putative, expressed	Protein kinase, catalytic domain domain containing protein.
555	Os3626	Os42815	0.999994	5.99e-11		Os555	MSTRG.8231.1		A2J10_11T0151300.6	aspartic proteinase nepenthesin-1 precursor, Putative, expressed	#N/A	#N/A
556	Os5130	Os19329	0.999994	6.05e-11		Os556	A2J10_07T0239100.1		MSTRG.21375.4	#N/A	#N/A	#N/A
557	Os1129	Os39821	0.999994	6.05e-11		Os557	A2J10_07T0131000.1		MSTRG.16347.1	#N/A	#N/A	#N/A
558	Os5130	Os14463	0.999994	6.06e-11		Os558	A2J10_02T0296900.1		A2J10_06T0300100.1	CHIT8 - Chitinase family protein precursor, expressed	#N/A	#N/A
559	Os3626	Os32746	0.999994	6.06e-11		Os559	MSTRG.9013.1		A2J10_01T0509900.1	Conserved hypothetical protein	#N/A	#N/A
560	Os1129	Os42888	0.999994	6.08e-11		Os560	MSTRG.6756.1		A2J10_05T0041400.1	glyoxalase family protein, Putative, expressed	glyoxalase family protein, Putative, expressed	Glyoxalase/bleomycin resistance protein/dioxygenase domain containing protein.
561	Os3626	Os43846	0.999994	6.09e-11		Os561	A2J10_03T0103700.1		A2J10_01T0093200.2	expressed protein	#N/A	#N/A
562	Os1129	Os30362	0.999994	6.1e-11		Os562	A2J10_07T0217400.1		MSTRG.1778.2	#N/A	Putative expressed protein	#N/A
563	Os1129	Os28733	0.999994	6.1e-11		Os563	A2J10_02T0071800.1		A2J10_05T0176600.2	expressed protein	expressed protein	Tetratricopeptide-like helical domain containing protein.
564	Os1129	Os32164	0.999994	6.12e-11		Os564	MSTRG.15201.3		MSTRG.7975.3	#N/A	#N/A	#N/A
565	Os3626	Os32073	0.999994	6.13e-11		Os565	MSTRG.2887.1		A2J10_10T0144100.1	cytochrome b5-like Heme/Steroid binding domain containing protein, expressed	#N/A	#N/A
566	Os3626	Os32091	0.999994	6.18e-11		Os566	A2J10_01T0420000.1		A2J10_08T0161600.1	auxin-repressed protein, Putative, expressed	#N/A	#N/A
567	Os1129	Os5922	0.999994	6.19e-11		Os567	MSTRG.11922.1		MSTRG.14484.6	#N/A	#N/A	#N/A
568	Os3626	Os42758	0.999994	6.21e-11		Os568	A2J10_09T0019600.1		MSTRG.17837.4	#N/A	#N/A	#N/A
569	Os3626	Os43909	0.999994	6.23e-11		Os569	A2J10_06T0154300.1		MSTRG.6999.3	#N/A	#N/A	#N/A
570	Os1129	Os33942	0.999994	6.24e-11		Os570	A2J10_04T0066300.1		MSTRG.6040.1	#N/A	#N/A	#N/A
571	Os3626	Os28232	0.999994	6.25e-11		Os571	A2J10_02T0213300.1		MSTRG.3365.5	#N/A	#N/A	Conserved hypothetical protein.
572	Os1129	Os13774	0.999994	6.31e-11		Os572	A2J10_06T0003600.1		A2J10_02T0059100.1	ubiquitin fusion degradation protein, Putative, expressed	ubiquitin fusion degradation protein, Putative, expressed	Similar to Ubiquitin fusion degradation 1-like.
573	Os1129	Os25575	0.999994	6.32e-11		Os573	MSTRG.5139.1		A2J10_03T0385000.1	cytochrome P450 71E1, Putative, expressed	Hypothetical protein	Similar to Cytochrome P450.
574	Os1129	Os28959	0.999993	6.34e-11		Os574	A2J10_07T0194700.1		A2J10_07T0179200.1	glucan endo-1,3-beta-glucosidase precursor, Putative, expressed	glucan endo-1,3-beta-glucosidase precursor, Putative, expressed	#N/A
575	Os1129	Os30917	0.999993	6.36e-11		Os575	MSTRG.12973.2		A2J10_01T0100800.1	early light-induced protein, chloroplast precursor, Putative, expressed	early light-induced protein, chloroplast precursor, Putative, expressed	Similar to TCP-domain protein.
576	Os3626	Os33331	0.999993	6.37e-11		Os576	MSTRG.15693.1		A2J10_02T0324900.1	lectin-like protein kinase, Putative, expressed	#N/A	Hypothetical protein.
577	Os3626	Os17462	0.999993	6.38e-11		Os577	A2J10_12T0164300.1		A2J10_03T0379700.2	Putative amine oxidase, flavin-containing, domain containing protein, expressed	#N/A	#N/A
578	Os1129	Os35800	0.999993	6.39e-11		Os578	A2J10_02T0012600.1		MSTRG.1778.10	#N/A	#N/A	#N/A
579	Os1129	Os39411	0.999993	6.47e-11		Os579	A2J10_05T0205200.2		A2J10_03T0022300.1	expressed protein	#N/A	#N/A
580	Os28327	Os28812	0.999993	6.48e-11		Os580	MSTRG.6004.1		MSTRG.9109.5	#N/A	#N/A	#N/A
581	Os1129	Os22435	0.999993	6.5e-11		Os581	A2J10_07T0030100.1		A2J10_01T0307700.1	cytidine/deoxycytidylate deaminase, Putative, expressed	cytidine/deoxycytidylate deaminase, Putative, expressed	CMP/dCMP deaminase, zinc-binding domain containing protein.
582	Os3626	Os39664	0.999993	6.51e-11		Os582	MSTRG.18634.2		A2J10_06T0052100.2	auxin response factor, Putative, expressed	auxin response factor, Putative, expressed	Similar to Auxin response factor 1.
583	Os1129	Os30742	0.999993	6.58e-11		Os583	MSTRG.23944.3		MSTRG.24153.1	#N/A	receptor like protein kinase, Putative, expressed	Similar to Resistance protein candidate (Fragment).
584	Os3626	Os28492	0.999993	6.64e-11		Os584	A2J10_07T0111000.1		MSTRG.19564.2	#N/A	#N/A	#N/A
585	Os25155	Os42701	0.999993	6.67e-11		Os585	A2J10_11T0046900.2		A2J10_02T0266500.1	mitochondrial carrier protein, Putative, expressed	mitochondrial carrier protein, Putative, expressed	Mitochondrial carrier protein domain containing protein.
586	Os3626	Os43782	0.999993	6.68e-11		Os586	MSTRG.1631.1		A2J10_11T0134600.1	Conserved hypothetical protein	#N/A	#N/A
587	Os1129	Os28851	0.999993	6.72e-11		Os587	MSTRG.6253.1		A2J10_04T0133900.1	BTBZ4 - Bric-a-Brac, Tramtrack, Broad Complex BTB domain with TAZ zinc finger and Calmodulin-binding domains,expressed	BTBZ4 - Bric-a-Brac, Tramtrack, Broad Complex BTB domain with TAZ zinc finger and Calmodulin-binding domains,expressed	Kelch related domain containing protein.
588	Os3626	Os17268	0.999993	6.73e-11		Os588	MSTRG.23567.9		MSTRG.25093.1	#N/A	#N/A	#N/A
589	Os1129	Os43936	0.999993	6.75e-11		Os589	MSTRG.14375.1		A2J10_03T0083500.2	cysteine-rich repeat secretory protein 55 precursor, Putative, expressed	#N/A	#N/A
590	Os3626	Os43961	0.999993	6.76e-11		Os590	MSTRG.18669.1		MSTRG.1673.10	#N/A	#N/A	#N/A
591	Os1129	Os7027	0.999993	6.79e-11		Os591	MSTRG.13039.1		MSTRG.14556.5	#N/A	#N/A	#N/A
592	Os3626	Os25389	0.999993	6.8e-11		Os592	MSTRG.23318.1		A2J10_01T0333500.1	1,3-beta-glucan synthase component, Putative, expressed	#N/A	#N/A
593	Os3626	Os28895	0.999993	6.83e-11		Os593	MSTRG.14277.4		MSTRG.24286.1	#N/A	#N/A	#N/A
594	Os1129	Os12185	0.999993	6.87e-11		Os594	MSTRG.5717.3		MSTRG.4506.6	#N/A	#N/A	#N/A
595	Os1129	Os39893	0.999993	6.91e-11		Os595	A2J10_01T0207400.1		A2J10_09T0173200.1	expressed protein	expressed protein	Diacylglycerol acyltransferase domain containing protein.
596	Os1129	Os43255	0.999993	7e-11		Os596	MSTRG.5185.1		A2J10_01T0506500.1	NAD dependent epimerase/dehydratase family protein, Putative, expressed	#N/A	#N/A
597	Os3626	Os42999	0.999993	7.01e-11		Os597	A2J10_08T0076900.1		MSTRG.9574.2	#N/A	#N/A	#N/A
598	Os1129	Os34553	0.999993	7.02e-11		Os598	MSTRG.3118.2		A2J10_03T0260500.1	thaumatin family domain containing protein, expressed	thaumatin family domain containing protein, expressed	Similar to Thaumatin-like protein.
599	Os1129	Os30871	0.999993	7.04e-11		Os599	A2J10_04T0173300.1		MSTRG.21550.1	#N/A	EF hand family protein, Putative, expressed	Small calcium-binding protein with one EF-hand motif, Positive regulation of osmotic and salt tolerance
600	Os5130	Os42442	0.999993	7.08e-11		Os600	MSTRG.15534.1		MSTRG.6982.1	#N/A	#N/A	Wall-associated receptor-like protein kinase, Blast disease resistance
601	Os1129	Os43474	0.999993	7.09e-11		Os601	A2J10_11T0175100.1		A2J10_04T0105300.1	protein binding protein, Putative, expressed	protein binding protein, Putative, expressed	Zinc finger, RING-type domain containing protein.
602	Os1129	Os2005	0.999993	7.1e-11		Os602	MSTRG.16620.1		A2J10_04T0079700.1	expressed protein	expressed protein	#N/A
603	Os1129	Os11629	0.999993	7.14e-11		Os603	A2J10_03T0039200.2		MSTRG.15754.3	#N/A	#N/A	#N/A
604	Os3626	Os8507	0.999993	7.18e-11		Os604	MSTRG.9932.1		MSTRG.10471.2	#N/A	#N/A	#N/A
605	Os1129	Os19316	0.999993	7.19e-11		Os605	A2J10_03T0347700.1		A2J10_03T0185400.1	PDI, Putative, expressed	#N/A	#N/A
606	Os3626	Os28575	0.999993	7.2e-11		Os606	A2J10_07T0232200.1		MSTRG.11982.2	#N/A	#N/A	#N/A
607	Os1129	Os43169	0.999993	7.23e-11		Os607	MSTRG.10528.2		A2J10_08T0055400.1	polyprenyl synthetase, Putative, expressed	polyprenyl synthetase, Putative, expressed	#N/A
608	Os3626	Os22244	0.999993	7.26e-11		Os608	MSTRG.2820.1		MSTRG.4842.2	#N/A	#N/A	#N/A
609	Os3626	Os25074	0.999993	7.3e-11		Os609	MSTRG.13350.4		A2J10_01T0090700.5	Putative expressed protein	KH domain containing protein, Putative, expressed	#N/A
610	Os3626	Os37944	0.999993	7.32e-11		Os610	A2J10_09T0033200.1		MSTRG.7599.2	#N/A	#N/A	#N/A
611	Os1129	Os43473	0.999993	7.35e-11		Os611	MSTRG.17036.1		A2J10_02T0389800.6	UDP-glucuronate 4-epimerase, Putative, expressed	#N/A	#N/A
612	Os5130	Os30000	0.999993	7.36e-11		Os612	A2J10_02T0366100.2		A2J10_09T0027300.1	ethanol tolerance protein GEKO1, Putative, expressed	#N/A	#N/A
613	Os3626	Os43108	0.999993	7.54e-11		Os613	MSTRG.2527.2		MSTRG.2776.9	#N/A	#N/A	#N/A
614	Os3626	Os21712	0.999993	7.65e-11		Os614	A2J10_05T0104800.1		A2J10_12T0003900.3	Putative BTBN22 - Bric-a-Brac, Tramtrack, Broad Complex BTB domain with non-phototropic hypocotyl 3 NPH3 and coiled-coil domains, expressed	BTBN20 - Bric-a-Brac, Tramtrack, Broad Complex BTB domain with non-phototropic hypocotyl 3 NPH3 and coiled-coil domains, expressed	Similar to Mannan endo-1,4-beta-mannosidase 7.
615	Os3626	Os37589	0.999993	7.66e-11		Os615	MSTRG.17368.1		MSTRG.22677.3	#N/A	#N/A	#N/A
616	Os3626	Os43648	0.999993	7.7e-11		Os616	A2J10_05T0244200.1		A2J10_03T0191100.1	expressed protein	expressed protein	Conserved hypothetical protein.
617	Os3626	Os17851	0.999993	7.71e-11		Os617	MSTRG.15556.2		MSTRG.2147.1	#N/A	OsCttP1 - Putative C-terminal processing peptidase homologue, expressed	Similar to carboxyl-terminal-processing protease.
618	Os1129	Os17718	0.999993	7.73e-11		Os618	A2J10_04T0078300.1		MSTRG.14997.1	#N/A	2-aminoethanethiol dioxygenase, Putative, expressed	Similar to H0820C10.4 protein.
619	Os3626	Os42741	0.999993	7.77e-11		Os619	MSTRG.12816.1		A2J10_01T0280500.1	glycosyl hydrolase, Putative, expressed	glycosyl hydrolase, Putative, expressed	Acidic class III chitinase OsChib3a precursor (Chitinase) (EC 3.2.1.14).
620	Os1129	Os31924	0.999993	7.78e-11		Os620	A2J10_09T0161400.1		A2J10_09T0145000.1	gibberellin receptor GID1L2, Putative, expressed	gibberellin receptor GID1L2, Putative, expressed	Alpha/beta hydrolase fold-3 domain containing protein.
621	Os3626	Os22118	0.999993	7.78e-11		Os621	A2J10_07T0093400.1		A2J10_07T0024900.3	glycine-rich protein, Putative, expressed	#N/A	#N/A
622	Os3626	Os34303	0.999993	7.83e-11		Os622	MSTRG.19143.1		A2J10_02T0177300.1	cupin domain containing protein, expressed	cupin domain containing protein, expressed	#N/A
623	Os1129	Os32371	0.999993	7.84e-11		Os623	A2J10_03T0012900.1		MSTRG.4663.1	#N/A	#N/A	Protein serine/threonine kinase (Protein kinase).
624	Os3626	Os24956	0.999993	7.86e-11		Os624	A2J10_01T0143200.1		A2J10_03T0199200.1	circadian clock coupling factor-related, Putative, expressed	#N/A	#N/A
625	Os1129	Os12652	0.999993	7.87e-11		Os625	A2J10_04T0177600.4		A2J10_03T0380800.3	ion channel DMI1-like, chloroplast precursor, Putative, expressed	#N/A	#N/A
626	Os3626	Os13637	0.999993	7.88e-11		Os626	A2J10_03T0045600.1		MSTRG.17628.3	#N/A	#N/A	#N/A
627	Os5130	Os34142	0.999993	7.89e-11		Os627	A2J10_07T0140000.1		A2J10_07T0243100.1	calmodulin-binding transcription activator, Putative, expressed	#N/A	#N/A
628	Os1129	Os39299	0.999993	7.96e-11		Os628	MSTRG.20960.1		A2J10_11T0236300.1	glycosyl hydrolase, Putative, expressed	#N/A	Glycoside hydrolase, subgroup, catalytic core domain containing protein.
629	Os3626	Os38027	0.999993	8.09e-11		Os629	MSTRG.10593.1		A2J10_05T0008100.1	avr9/Cf-9 rapidly elicited protein 74, Putative, expressed	avr9/Cf-9 rapidly elicited protein 74, Putative, expressed	#N/A
630	Os3626	Os38061	0.999993	8.12e-11		Os630	A2J10_04T0160400.1		A2J10_04T0307900.1	expressed protein	expressed protein	Paired amphipathic helix domain containing protein.
631	Os1129	Os42536	0.999993	8.14e-11		Os631	A2J10_02T0329200.1		MSTRG.12171.3	#N/A	#N/A	#N/A
632	Os3626	Os42659	0.999993	8.14e-11		Os632	A2J10_09T0208800.1		MSTRG.11909.3	#N/A	#N/A	#N/A
633	Os1129	Os43663	0.999993	8.18e-11		Os633	MSTRG.6321.1		MSTRG.6538.1	#N/A	#N/A	#N/A
634	Os3626	Os23760	0.999993	8.3e-11		Os634	MSTRG.7681.1		MSTRG.23959.1	#N/A	thioredoxin, Putative, expressed	Similar to Thioredoxin-like 1.
635	Os1129	Os33697	0.999993	8.39e-11		Os635	MSTRG.18799.1		A2J10_01T0315400.1	DUF584 domain containing protein, Putative, expressed	DUF584 domain containing protein, Putative, expressed	A member of S40 gene family, Leaf senescence
636	Os3626	Os31759	0.999993	8.41e-11		Os636	A2J10_05T0121600.1		A2J10_03T0396200.2	1-aminocyclopropane-1-carboxylate oxidase 2, Putative, expressed	#N/A	#N/A
637	Os5130	Os20578	0.999992	8.44e-11		Os637	MSTRG.19521.1		A2J10_01T0430700.1	hs1, Putative, expressed	#N/A	#N/A
638	Os1129	Os24973	0.999992	8.48e-11		Os638	A2J10_08T0166800.1		A2J10_01T0282900.1	pterin-4-alpha-carbinolamine dehydratase, Putative, expressed	#N/A	#N/A
639	Os3626	Os25064	0.999992	8.66e-11		Os639	MSTRG.19060.6		MSTRG.18775.1	#N/A	#N/A	#N/A
640	Os3626	Os19586	0.999992	8.86e-11		Os640	MSTRG.20287.5		MSTRG.7676.3	#N/A	#N/A	#N/A
641	Os3626	Os24979	0.999992	8.9e-11		Os641	MSTRG.24218.3		MSTRG.12861.2	#N/A	#N/A	#N/A
642	Os1129	Os41559	0.999992	8.91e-11		Os642	A2J10_02T0292400.1		A2J10_11T0044300.1	expressed protein	expressed protein	Conserved hypothetical protein.
643	Os3626	Os18110	0.999992	9.02e-11		Os643	MSTRG.22980.1		MSTRG.11503.8	#N/A	#N/A	#N/A
644	Os1129	Os42745	0.999992	9.02e-11		Os644	A2J10_01T0305900.1		MSTRG.14646.2	#N/A	#N/A	#N/A
645	Os3626	Os7018	0.999992	9.07e-11		Os645	A2J10_02T0390700.1		MSTRG.18521.1	#N/A	mitochondrial carrier protein, Putative, expressed	Mitochondrial substrate carrier family protein.
646	Os5130	Os6478	0.999992	9.11e-11		Os646	A2J10_04T0095000.1		A2J10_08T0180700.1	plastocyanin-like domain containing protein, Putative, expressed	plastocyanin-like domain containing protein, Putative, expressed	Cupredoxin domain containing protein.
647	Os1129	Os21540	0.999992	9.12e-11		Os647	A2J10_04T0122800.3		A2J10_01T0089000.2	expressed protein	expressed protein	Conserved hypothetical protein.
648	Os1129	Os13217	0.999992	9.27e-11		Os648	A2J10_02T0024300.1		MSTRG.16528.1	#N/A	#N/A	#N/A
649	Os1129	Os38514	0.999992	9.32e-11		Os649	A2J10_01T0250900.1		A2J10_12T0172600.1	Conserved hypothetical protein	#N/A	#N/A
650	Os1129	Os32331	0.999992	9.33e-11		Os650	A2J10_10T0148300.3		MSTRG.21587.8	#N/A	#N/A	#N/A
651	Os3626	Os25324	0.999992	9.35e-11		Os651	MSTRG.17226.1		MSTRG.3872.5	#N/A	#N/A	#N/A
652	Os1129	Os43331	0.999992	9.37e-11		Os652	MSTRG.19633.1		MSTRG.26433.1	#N/A	ribulose-1,5 bisphosphate carboxylase/oxygenase large subunit N-methyltransferase, chloroplast precursor,Putative, expressed	Similar to Ribulose-1,5 bisphosphate carboxylase/oxygenase large subunit N- methyltransferase, chloroplast precursor (EC 2.1.1.127) ([Ribulose- bisphosphate carboxylase]-lysine N-methyltransferase) (RuBisCO methyltransferase) (RuBisco LSMT) (rbcMT).
653	Os3626	Os43041	0.999992	9.42e-11		Os653	MSTRG.1254.1		MSTRG.16837.2	#N/A	#N/A	#N/A
654	Os25531	Os42731	0.999992	9.43e-11		Os654	A2J10_11T0061300.1		A2J10_08T0101000.1	expressed protein	#N/A	#N/A
655	Os3626	Os19352	0.999992	9.48e-11		Os655	MSTRG.25071.1		MSTRG.19272.3	#N/A	#N/A	#N/A
656	Os1129	Os44164	0.999992	9.52e-11		Os656	MSTRG.22413.3		A2J10_03T0026600.2	Conserved hypothetical protein	#N/A	#N/A
657	Os1129	Os27294	0.999992	9.6e-11		Os657	MSTRG.2022.3		MSTRG.7715.1	#N/A	#N/A	#N/A
658	Os3626	Os5130	0.999992	9.65e-11		Os658	A2J10_03T0260600.1		A2J10_11T0183000.1	zinc finger family protein, Putative, expressed	zinc finger family protein, Putative, expressed	Similar to RING domain protein.
659	Os3626	Os5130	0.999992	9.65e-11		Os659	A2J10_03T0096600.1		MSTRG.889.4	#N/A	#N/A	#N/A
660	Os1129	Os37215	0.999992	9.67e-11		Os660	A2J10_03T0262000.1		MSTRG.16302.4	#N/A	#N/A	#N/A
661	Os1129	Os44211	0.999992	9.68e-11		Os661	A2J10_12T0004400.1		MSTRG.6664.5	#N/A	#N/A	#N/A
662	Os3626	Os17195	0.999992	9.75e-11		Os662	A2J10_07T0208200.1		MSTRG.4355.1	#N/A	#N/A	#N/A
663	Os1129	Os44291	0.999992	9.75e-11		Os663	A2J10_01T0393000.1		MSTRG.12257.1	#N/A	aminotransferase domain containing protein, Putative, expressed	Similar to Branched-chain-amino-acid aminotransferase 3, chloroplast precursor (EC 2.6.1.42) (Atbcat-3).
664	Os3626	Os42419	0.999992	9.79e-11		Os664	MSTRG.14560.3		A2J10_02T0417300.4	oxidoreductase, Putative, expressed	oxidoreductase, Putative, expressed	#N/A
665	Os1129	Os44158	0.999992	9.79e-11		Os665	A2J10_07T0178100.1		MSTRG.16939.6	#N/A	#N/A	#N/A
666	Os3626	Os23409	0.999992	9.94e-11		Os666	MSTRG.1350.1		A2J10_02T0352700.1	ATP synthase F1, delta subunit family protein, Putative, expressed	#N/A	#N/A
667	Os1129	Os34753	0.999992	9.98e-11		Os667	A2J10_09T0108400.1		A2J10_04T0215200.2	RING-H2 finger protein ATL2A, Putative, expressed	#N/A	#N/A
668	Os3626	Os18088	0.999992	1e-10		Os668	MSTRG.3826.1		A2J10_09T0043500.1	Conserved hypothetical protein	#N/A	#N/A
669	Os1129	Os37991	0.999992	1.01e-10		Os669	A2J10_04T0211900.1		A2J10_10T0164600.1	expressed protein	#N/A	#N/A
670	Os3626	Os43623	0.999992	1.02e-10		Os670	MSTRG.26659.3		MSTRG.9582.5	#N/A	#N/A	#N/A
671	Os1129	Os31207	0.999992	1.03e-10		Os671	MSTRG.12148.1		A2J10_05T0019300.1	transferase family protein, Putative, expressed	transferase family protein, Putative, expressed	Hypothetical protein.
672	Os3626	Os28867	0.999992	1.03e-10		Os672	A2J10_08T0093600.1		A2J10_03T0041900.1	expressed protein	#N/A	#N/A
673	Os1129	Os25947	0.999992	1.03e-10		Os673	A2J10_01T0255600.1		MSTRG.17043.3	#N/A	#N/A	#N/A
674	Os3626	Os21744	0.999992	1.03e-10		Os674	MSTRG.14828.2		MSTRG.4887.2	#N/A	#N/A	#N/A
675	Os3626	Os43103	0.999992	1.03e-10		Os675	MSTRG.14263.1		MSTRG.6487.1	#N/A	#N/A	#N/A
676	Os1129	Os41962	0.999992	1.04e-10		Os676	A2J10_03T0030600.1		A2J10_04T0125400.1	DUF677 domain containing protein, Putative, expressed	#N/A	#N/A
677	Os3626	Os37781	0.999992	1.04e-10		Os677	A2J10_08T0214100.1		A2J10_07T0127200.1	60S acidic ribosomal protein, Putative, expressed	#N/A	#N/A
678	Os3626	Os14935	0.999992	1.04e-10		Os678	A2J10_04T0118200.1		MSTRG.174.5	#N/A	#N/A	#N/A
679	Os3626	Os42826	0.999992	1.05e-10		Os679	A2J10_07T0156600.3		MSTRG.2824.4	#N/A	#N/A	#N/A
680	Os3626	Os42646	0.999992	1.05e-10		Os680	A2J10_01T0250300.1		A2J10_05T0243400.3	chloroplastic group IIA intron splicing facilitator CRS1, chloroplast precursor, Putative, expressed	#N/A	#N/A
681	Os1129	Os32930	0.999992	1.06e-10		Os681	MSTRG.3903.1		A2J10_05T0005700.1	tetraspanin family protein, Putative, expressed	tetraspanin family protein, Putative, expressed	Tetraspanin domain containing protein.
682	Os3626	Os21859	0.999992	1.07e-10		Os682	MSTRG.23437.2		MSTRG.7941.1	#N/A	DNA-directed RNA polymerase subunit beta, Putative, expressed	#N/A
683	Os5130	Os42510	0.999992	1.07e-10		Os683	MSTRG.19207.2		MSTRG.23014.1	#N/A	isocitrate lyase, Putative, expressed	Similar to Isocitrate lyase (Fragment).
684	Os1129	Os40772	0.999992	1.08e-10		Os684	A2J10_01T0325200.1		A2J10_01T0063300.1	expressed protein	expressed protein	Similar to H0717B12.1 protein.
685	Os1129	Os27864	0.999991	1.08e-10		Os685	MSTRG.9893.1		MSTRG.10695.1	#N/A	2Fe-2S iron-sulfur cluster binding domain containing protein, expressed	Similar to Ferredoxin, root R-B1.
686	Os3626	Os43864	0.999991	1.09e-10		Os686	A2J10_03T0244700.1		MSTRG.3354.1	#N/A	starch binding domain containing protein, Putative, expressed	Carbohydrate-binding module 20 (CBM20)-containing protein, Starch biosynthesis
687	Os1129	Os31952	0.999991	1.1e-10		Os687	A2J10_03T0372000.1		A2J10_04T0188600.1	chitinase 2, Putative, expressed	#N/A	#N/A
688	Os3626	Os43044	0.999991	1.11e-10		Os688	A2J10_10T0168700.2		A2J10_03T0041500.1	XS domain containing protein, expressed	#N/A	#N/A
689	Os3626	Os27161	0.999991	1.11e-10		Os689	A2J10_04T0320800.1		MSTRG.24955.4	#N/A	#N/A	#N/A
690	Os3626	Os43053	0.999991	1.11e-10		Os690	A2J10_06T0263400.1		MSTRG.3401.9	#N/A	#N/A	#N/A
691	Os3626	Os25346	0.999991	1.11e-10		Os691	A2J10_07T0288000.1		A2J10_02T0110400.1	VQ domain containing protein, Putative, expressed	VQ domain containing protein, Putative, expressed	VQ domain containing protein.
692	Os1129	Os42699	0.999991	1.12e-10		Os692	A2J10_03T0040800.1		A2J10_03T0088700.1	Putative TBC domain containing protein, expressed	Putative TBC domain containing protein, expressed	Similar to TBC domain containing protein, expressed.
693	Os3626	Os3849	0.999991	1.12e-10		Os693	MSTRG.2936.1		A2J10_02T0218300.1	VP15, Putative, expressed	#N/A	#N/A
694	Os1989	Os16909	0.999991	1.13e-10		Os694	A2J10_01T0098900.1		A2J10_08T0227600.1	expressed protein	expressed protein	Hypothetical gene.
695	Os3626	Os40234	0.999991	1.15e-10		Os695	MSTRG.23854.1		MSTRG.10160.1	#N/A	peptide transporter PTR2, Putative, expressed	TGF-beta receptor, type I/II extracellular region family protein.
696	Os3626	Os31790	0.999991	1.15e-10		Os696	A2J10_06T0020300.1		MSTRG.16750.4	#N/A	#N/A	#N/A
697	Os28327	Os43767	0.999991	1.15e-10		Os697	A2J10_05T0104600.1		A2J10_12T0135900.1	elongation factor TS family protein, expressed	#N/A	#N/A
698	Os3626	Os43547	0.999991	1.15e-10		Os698	A2J10_04T0289000.2		A2J10_06T0066100.1	zinc finger, C3HC4 type domain containing protein, expressed	zinc finger, C3HC4 type domain containing protein, expressed	Zinc finger, RING-type domain containing protein.
699	Os1129	Os25084	0.999991	1.15e-10		Os699	A2J10_06T0251800.1		A2J10_01T0334900.1	la domain containing protein, expressed	#N/A	#N/A
700	Os3626	Os25710	0.999991	1.15e-10		Os700	A2J10_01T0083100.1		MSTRG.847.1	#N/A	X8 domain containing protein, expressed	Similar to Beta-1,3-glucanase-like protein.
701	Os1129	Os42570	0.999991	1.16e-10		Os701	MSTRG.21537.1		MSTRG.21918.2	#N/A	#N/A	#N/A
702	Os1129	Os34740	0.999991	1.16e-10		Os702	MSTRG.12672.4		MSTRG.3091.1	#N/A	DNA binding protein, Putative, expressed	Protein of unknown function DUF266, plant family protein.
703	Os1129	Os28759	0.999991	1.16e-10		Os703	MSTRG.23995.1		A2J10_08T0204800.1	glycosyl hydrolase, Putative, expressed	glycosyl hydrolase, Putative, expressed	Similar to Class III chitinase homologue (OsChib3H-h) (Fragment).
704	Os1129	Os35910	0.999991	1.17e-10		Os704	A2J10_06T0107000.1		A2J10_05T0205000.1	domain of unknown function, DUF250 domain containing protein, expressed	#N/A	#N/A
705	Os3626	Os26719	0.999991	1.17e-10		Os705	A2J10_02T0356400.1		A2J10_04T0132400.1	cytochrome P450, Putative, expressed	cytochrome P450, Putative, expressed	Similar to Cytochrome P450 71A1 (EC 1.14.-.-) (CYPLXXIA1) (ARP-2).
706	Os1129	Os28897	0.999991	1.18e-10		Os706	A2J10_01T0469300.1		MSTRG.5044.1	#N/A	heavy metal-associated domain containing protein, expressed	Heavy metal transport/detoxification protein domain containing protein.
707	Os1129	Os38430	0.999991	1.18e-10		Os707	A2J10_01T0262500.1		MSTRG.20710.3	#N/A	#N/A	#N/A
708	Os1129	Os39509	0.999991	1.18e-10		Os708	A2J10_08T0146200.1		MSTRG.18272.2	#N/A	#N/A	#N/A
709	Os1129	Os3849	0.999991	1.19e-10		Os709	MSTRG.18235.1		A2J10_11T0206200.1	expressed protein	#N/A	#N/A
710	Os5130	Os29957	0.999991	1.19e-10		Os710	A2J10_05T0151400.1		MSTRG.527.1	#N/A	transferase family protein, Putative, expressed	Transferase family protein.
711	Os3626	Os38781	0.999991	1.19e-10		Os711	MSTRG.19968.1		A2J10_07T0090800.2	Putative expressed protein	#N/A	#N/A
712	Os28327	Os43613	0.999991	1.2e-10		Os712	A2J10_08T0048600.1		MSTRG.9204.8	#N/A	#N/A	#N/A
713	Os3626	Os42977	0.999991	1.2e-10		Os713	A2J10_07T0002500.1		MSTRG.21051.1	#N/A	#N/A	#N/A
714	Os5130	Os26573	0.999991	1.2e-10		Os714	MSTRG.23672.1		A2J10_03T0112700.2	plant protein of unknown function domain containing protein, expressed	#N/A	#N/A
715	Os3626	Os25449	0.999991	1.21e-10		Os715	MSTRG.22476.1		A2J10_02T0292500.1	Putative OsFBDUF13 - F-box and DUF domain containing protein, expressed	OsFBDUF13 - F-box and DUF domain containing protein, expressed	F-box domain protein, Regulation of root growth, Negative role in response to abiotic stress
716	Os28327	Os39103	0.999991	1.21e-10		Os716	A2J10_06T0183400.1		MSTRG.16835.10	#N/A	#N/A	#N/A
717	Os5130	Os42815	0.999991	1.21e-10		Os717	A2J10_06T0063200.1		MSTRG.1903.1	#N/A	#N/A	#N/A
718	Os5130	Os43813	0.999991	1.21e-10		Os718	A2J10_02T0345600.1		A2J10_02T0054200.1	B-box zinc finger family protein, Putative, expressed	B-box zinc finger family protein, Putative, expressed	Zinc finger, B-box domain containing protein.
719	Os5130	Os42754	0.999991	1.21e-10		Os719	MSTRG.19602.1		A2J10_06T0226900.1	anthranilate phosphoribosyltransferase, Putative, expressed	#N/A	#N/A
720	Os5130	Os25154	0.999991	1.21e-10		Os720	A2J10_03T0286400.1		MSTRG.18130.1	#N/A	#N/A	#N/A
721	Os5130	Os32091	0.999991	1.21e-10		Os721	A2J10_07T0200400.1		A2J10_06T0091400.4	Putative NAD binding domain of 6-phosphogluconate dehydrogenase containing protein, expressed	#N/A	#N/A
722	Os5130	Os43909	0.999991	1.21e-10		Os722	MSTRG.21496.3		A2J10_11T0079100.3	expressed protein	expressed protein	Ankyrin repeat containing protein.
723	Os5130	Os25117	0.999991	1.21e-10		Os723	A2J10_01T0416400.2		MSTRG.2704.1	#N/A	#N/A	#N/A
724	Os5130	Os39664	0.999991	1.21e-10		Os724	MSTRG.16522.1		MSTRG.4929.3	#N/A	#N/A	#N/A
725	Os5130	Os28492	0.999991	1.21e-10		Os725	A2J10_01T0291300.2		A2J10_06T0152200.1	uncharacterized membrane protein, Putative, expressed	#N/A	#N/A
726	Os5130	Os28662	0.999991	1.21e-10		Os726	MSTRG.17748.2		MSTRG.14585.3	#N/A	#N/A	#N/A
727	Os5130	Os43782	0.999991	1.21e-10		Os727	A2J10_01T0246700.2		A2J10_01T0358000.1	DUF567 domain containing protein, Putative, expressed	DUF567 domain containing protein, Putative, expressed	Protein of unknown function DUF567 family protein.
728	Os5130	Os32251	0.999991	1.21e-10		Os728	MSTRG.8234.2		MSTRG.26879.3	#N/A	#N/A	#N/A
729	Os5130	Os25389	0.999991	1.21e-10		Os729	A2J10_01T0323900.1		MSTRG.886.2	#N/A	#N/A	#N/A
730	Os1129	Os37937	0.999991	1.21e-10		Os730	A2J10_10T0103000.5		MSTRG.9367.1	#N/A	#N/A	#N/A
731	Os5130	Os28895	0.999991	1.21e-10		Os731	A2J10_07T0294800.1		A2J10_07T0270100.1	ACT domain containing protein, expressed	ACT domain containing protein, expressed	Hypothetical conserved gene.
732	Os3626	Os38773	0.999991	1.22e-10		Os732	MSTRG.3532.1		MSTRG.955.2	#N/A	phenazine biosynthesis protein, Putative, expressed	Phenazine biosynthesis PhzC/PhzF protein family protein.
733	Os5130	Os32002	0.999991	1.22e-10		Os733	MSTRG.26896.1		MSTRG.23044.1	#N/A	TKL_IRAK_DUF26-lc.17 - DUF26 kinases have homology to DUF26 containing loci, expressed	Similar to Receptor-like protein kinase 4.
734	Os5130	Os43763	0.999991	1.22e-10		Os734	A2J10_08T0175100.1		A2J10_08T0063100.2	leucine-rich repeat-containing protein kinase family protein, Putative, expressed	SHR5-receptor-like kinase, Putative, expressed	Similar to SHR5-receptor-like kinase (Fragment).
735	Os5130	Os43666	0.999991	1.22e-10		Os735	A2J10_11T0126100.5		MSTRG.23357.5	#N/A	#N/A	#N/A
736	Os5130	Os25074	0.999991	1.22e-10		Os736	MSTRG.13621.1		A2J10_01T0028600.1	serine/threonine-protein kinase At1g18390 precursor, Putative, expressed	#N/A	#N/A
737	Os5130	Os37944	0.999991	1.22e-10		Os737	A2J10_07T0205100.1		A2J10_05T0194800.1	digalactosyldiacylglycerol synthase, chloroplast precursor, Putative, expressed	digalactosyldiacylglycerol synthase, chloroplast precursor, Putative, expressed	Digalactosyldiacylglycerol (DGDG) synthase, Anther and pollen development
738	Os5130	Os37270	0.999991	1.22e-10		Os738	A2J10_07T0018300.1		A2J10_01T0000900.4	enolase-phosphatase E1, Putative, expressed	#N/A	#N/A
739	Os5130	Os25488	0.999991	1.22e-10		Os739	MSTRG.6325.1		A2J10_11T0116700.1	Conserved hypothetical protein	#N/A	#N/A
740	Os5130	Os43596	0.999991	1.23e-10		Os740	MSTRG.22416.2		MSTRG.25634.4	#N/A	#N/A	#N/A
741	Os3626	Os34753	0.999991	1.23e-10		Os741	A2J10_10T0026200.1		A2J10_12T0087000.1	phytosulfokine receptor precursor, Putative, expressed	#N/A	#N/A
742	Os1129	Os25512	0.999991	1.23e-10		Os742	MSTRG.11444.2		A2J10_11T0017300.2	alpha-N-arabinofuranosidase, Putative, expressed	alpha-N-arabinofuranosidase, Putative, expressed	Similar to Arabinoxylan arabinofuranohydrolase isoenzyme AXAH-I.
743	Os1129	Os35487	0.999991	1.23e-10		Os743	A2J10_11T0047400.1		A2J10_12T0028800.1	dirigent, Putative, expressed	dirigent, Putative, expressed	Similar to disease resistance response protein 206.
744	Os5130	Os25237	0.999991	1.23e-10		Os744	A2J10_03T0362400.1		MSTRG.3885.2	#N/A	#N/A	Protein of unknown function DUF2305 domain containing protein.
745	Os3626	Os32930	0.999991	1.23e-10		Os745	A2J10_01T0414800.1		MSTRG.6666.1	#N/A	preprotein translocase subunit secY, Putative, expressed	SecY protein family protein.
746	Os5130	Os24956	0.999991	1.23e-10		Os746	A2J10_02T0371800.1		A2J10_02T0331300.1	aspartic proteinase nepenthesin-2 precursor, Putative, expressed	#N/A	#N/A
747	Os5130	Os42659	0.999991	1.24e-10		Os747	MSTRG.23179.5		MSTRG.5706.7	#N/A	#N/A	#N/A
748	Os5130	Os25679	0.999991	1.24e-10		Os748	A2J10_03T0126400.1		A2J10_06T0009500.2	Putative expressed protein	#N/A	#N/A
749	Os3626	Os17040	0.999991	1.25e-10		Os749	A2J10_01T0393600.1		MSTRG.1612.10	#N/A	#N/A	#N/A
750	Os5130	Os25064	0.999991	1.25e-10		Os750	A2J10_10T0105600.1		MSTRG.2696.6	#N/A	#N/A	#N/A
751	Os3626	Os28759	0.999991	1.26e-10		Os751	A2J10_01T0328200.1		MSTRG.21576.7	#N/A	#N/A	#N/A
752	Os5130	Os33013	0.999991	1.27e-10		Os752	A2J10_01T0289000.1		MSTRG.16951.1	#N/A	actin-6, Putative, expressed	Similar to Actin-related protein 8A.
753	Os5130	Os42916	0.999991	1.27e-10		Os753	MSTRG.2801.1		A2J10_03T0364500.2	protein kinase PKN/PRK1, effector, Putative, expressed	#N/A	#N/A
754	Os5130	Os25324	0.999991	1.28e-10		Os754	A2J10_02T0023800.1		A2J10_04T0082500.1	OsWAK60 - OsWAK receptor-like protein kinase, expressed	Putative OsWAK60 - OsWAK receptor-like protein kinase, expressed	Four-helical cytokine family protein.
755	Os14322	Os33909	0.999991	1.28e-10		Os755	MSTRG.741.1		MSTRG.3329.1	#N/A	glycosyl transferase 8 domain containing protein, Putative, expressed	Glycosyl transferase, family 8 protein.
756	Os5130	Os43041	0.999991	1.28e-10		Os756	A2J10_03T0203000.1		MSTRG.14305.1	#N/A	MYB family transcription factor, Putative, expressed	Homeodomain-like containing protein.
757	Os3626	Os25685	0.999991	1.28e-10		Os757	MSTRG.16995.2		MSTRG.1003.4	#N/A	#N/A	#N/A
758	Os5130	Os31964	0.999991	1.28e-10		Os758	A2J10_07T0178200.3		A2J10_01T0067200.1	expressed protein	expressed protein	Hypothetical conserved gene.
759	Os5130	Os25080	0.999991	1.29e-10		Os759	A2J10_09T0213100.4		MSTRG.9280.3	#N/A	#N/A	#N/A
760	Os5130	Os37694	0.999991	1.29e-10		Os760	MSTRG.1079.3		A2J10_03T0379000.2	pentatricopeptide, Putative, expressed	#N/A	#N/A
761	Os5130	Os39189	0.999991	1.29e-10		Os761	A2J10_03T0319200.3		MSTRG.968.6	#N/A	#N/A	#N/A
762	Os3626	Os42699	0.999991	1.29e-10		Os762	A2J10_01T0015500.1		A2J10_03T0109900.1	calvin cycle protein CP12, Putative, expressed	calvin cycle protein CP12, Putative, expressed	Similar to CP12 (Fragment).
763	Os3626	Os37612	0.999991	1.3e-10		Os763	A2J10_12T0009100.1		A2J10_02T0055400.3	LSM domain containing protein, expressed	#N/A	#N/A
764	Os5130	Os28867	0.999991	1.31e-10		Os764	MSTRG.9215.1		A2J10_05T0005100.1	lectin protein kinase family protein, Putative, expressed	lectin protein kinase family protein, Putative, expressed	Concanavalin A-like lectin/glucanase, subgroup domain containing protein.
765	Os5130	Os33694	0.999991	1.31e-10		Os765	A2J10_03T0284200.1		MSTRG.7189.2	#N/A	#N/A	#N/A
766	Os5130	Os25595	0.999991	1.31e-10		Os766	A2J10_10T0130400.1		MSTRG.27106.1	#N/A	la domain containing protein, Putative, expressed	Hypothetical conserved gene.
767	Os1129	Os18925	0.999991	1.31e-10		Os767	A2J10_08T0188400.2		A2J10_01T0508100.1	cyclase/dehydrase family protein, expressed	cyclase/dehydrase family protein, expressed	Streptomyces cyclase/dehydrase family protein.
768	Os3626	Os31952	0.999991	1.31e-10		Os768	MSTRG.12585.1		A2J10_01T0191700.1	DUF260 domain containing protein, Putative, expressed	DUF260 domain containing protein, Putative, expressed	#N/A
769	Os1129	Os41780	0.999991	1.31e-10		Os769	A2J10_01T0434600.1		MSTRG.2950.4	#N/A	#N/A	#N/A
770	Os1129	Os31790	0.999991	1.32e-10		Os770	A2J10_09T0212300.1		A2J10_05T0224900.1	expressed protein	expressed protein	Conserved hypothetical protein.
771	Os5130	Os37233	0.999991	1.32e-10		Os771	A2J10_04T0224700.1		A2J10_02T0127800.3	GTP-binding protein typA/bipA, Putative, expressed	NAM, Putative, expressed	No apical meristem (NAM) protein domain containing protein.
772	Os5130	Os40705	0.999991	1.33e-10		Os772	MSTRG.8690.6		MSTRG.9934.1	#N/A	SOUL heme-binding protein, Putative, expressed	SOUL haem-binding protein domain containing protein.
773	Os5130	Os43864	0.999991	1.33e-10		Os773	A2J10_06T0045900.1		MSTRG.253.4	#N/A	#N/A	#N/A
774	Os3626	Os39243	0.999991	1.33e-10		Os774	MSTRG.12526.1		A2J10_12T0042200.1	inhibitor I family protein, Putative, expressed	#N/A	#N/A
775	Os5130	Os43044	0.999991	1.33e-10		Os775	A2J10_04T0158400.1		MSTRG.18105.1	#N/A	#N/A	#N/A
776	Os5130	Os43053	0.999991	1.34e-10		Os776	MSTRG.12347.2		A2J10_06T0268300.1	early nodulin 20 precursor, Putative, expressed	early nodulin 20 precursor, Putative, expressed	Cupredoxin domain containing protein.
777	Os3626	Os25512	0.999991	1.34e-10		Os777	MSTRG.15750.1		MSTRG.6842.2	#N/A	#N/A	#N/A
778	Os5130	Os19352	0.999991	1.34e-10		Os778	A2J10_02T0031300.1		MSTRG.26725.2	#N/A	purine permease, Putative, expressed	Similar to ATPUP3.
779	Os5130	Os42712	0.999991	1.35e-10		Os779	MSTRG.8677.5		A2J10_02T0219200.1	expressed protein	#N/A	#N/A
780	Os5130	Os40234	0.999991	1.35e-10		Os780	A2J10_04T0109500.1		A2J10_06T0303700.2	HMG1/2, Putative, expressed	#N/A	#N/A
781	Os5130	Os43547	0.999991	1.35e-10		Os781	A2J10_01T0093600.1		MSTRG.21054.2	#N/A	#N/A	#N/A
782	Os5130	Os25710	0.999991	1.35e-10		Os782	MSTRG.17824.1		MSTRG.5702.3	#N/A	#N/A	#N/A
783	Os1129	Os41714	0.99999	1.36e-10		Os783	A2J10_01T0078100.1		MSTRG.7050.2	#N/A	#N/A	#N/A
784	Os3626	Os28250	0.99999	1.37e-10		Os784	MSTRG.7265.3		MSTRG.24655.2	#N/A	peptidyl-prolyl cis-trans isomerase, Putative, expressed	Similar to Peptidyl-prolyl cis-trans isomerase, cyclophilin-type family protein.
785	Os5130	Os25449	0.99999	1.37e-10		Os785	A2J10_04T0091300.1		A2J10_11T0111800.1	signal peptide peptidase-like 2B, Putative, expressed	signal peptide peptidase-like 2B, Putative, expressed	Protease-associated domain, PA domain containing protein.
786	Os5130	Os43808	0.99999	1.37e-10		Os786	A2J10_08T0153300.8		MSTRG.16350.1	#N/A	#N/A	Amino acid transporter, transmembrane domain containing protein.
787	Os1129	Os25346	0.99999	1.38e-10		Os787	A2J10_01T0357700.1		A2J10_01T0172200.1	peroxidase precursor, Putative, expressed	peroxidase precursor, Putative, expressed	Haem peroxidase domain containing protein.
788	Os3626	Os29663	0.99999	1.38e-10		Os788	A2J10_05T0118800.1		A2J10_05T0264500.2	protein kinase domain containing protein, expressed	#N/A	#N/A
789	Os3626	Os37991	0.99999	1.38e-10		Os789	MSTRG.5441.1		A2J10_07T0173900.1	tyrosyl-DNA phosphodiesterase 1, Putative, expressed	tyrosyl-DNA phosphodiesterase 1, Putative, expressed	Tyrosyl-DNA phosphodiesterase family protein.
790	Os5130	Os27161	0.99999	1.39e-10		Os790	MSTRG.13017.3		A2J10_10T0082600.1	photosystem II P680 chlorophyll A apoprotein, Putative, expressed	#N/A	#N/A
791	Os3626	Os22209	0.99999	1.39e-10		Os791	MSTRG.12738.1		MSTRG.10533.1	#N/A	OR, Putative, expressed	Ortholog of the cauliflower Orange gene, Carotenoid accumulation, Regulation of tiller number, Negative role in salt and cold tolerance
792	Os3626	Os40745	0.99999	1.39e-10		Os792	A2J10_01T0491700.1		MSTRG.5963.2	#N/A	#N/A	#N/A
793	Os5130	Os25685	0.99999	1.4e-10		Os793	A2J10_01T0313100.2		MSTRG.15090.1	#N/A	#N/A	#N/A
794	Os3626	Os42510	0.99999	1.4e-10		Os794	A2J10_06T0048200.1		MSTRG.8070.1	#N/A	#N/A	#N/A
795	Os5130	Os37612	0.99999	1.41e-10		Os795	MSTRG.9099.1		A2J10_11T0126100.4	cytochrome P450, Putative, expressed	#N/A	#N/A
796	Os5130	Os17040	0.99999	1.41e-10		Os796	MSTRG.8081.3		A2J10_11T0151100.1	9-cis-epoxycarotenoid dioxygenase 1, chloroplast precursor, Putative, expressed	#N/A	#N/A
797	Os1129	Os22184	0.99999	1.42e-10		Os797	A2J10_04T0188400.1		A2J10_01T0397400.4	Conserved hypothetical protein	#N/A	#N/A
798	Os1129	Os38300	0.99999	1.42e-10		Os798	A2J10_05T0165500.1		A2J10_01T0326100.1	histidine-containing phosphotransfer protein, Putative, expressed	#N/A	#N/A
799	Os3626	Os8153	0.99999	1.42e-10		Os799	A2J10_01T0236800.1		A2J10_06T0017300.1	methyltransferase domain containing protein, expressed	methyltransferase domain containing protein, expressed	Type I protein arginine methyltransferase
800	Os1129	Os31312	0.99999	1.42e-10		Os800	A2J10_02T0336000.1		MSTRG.216.3	#N/A	#N/A	#N/A
801	Os5130	Os25222	0.99999	1.42e-10		Os801	MSTRG.20950.1		A2J10_01T0293000.3	expressed protein	#N/A	#N/A
802	Os1129	Os29095	0.99999	1.42e-10		Os802	A2J10_02T0309600.1		A2J10_01T0402700.1	hydrolase, alpha/beta fold family domain containing protein, expressed	hydrolase, alpha/beta fold family domain containing protein, expressed	Alpha/beta hydrolase fold-1 domain containing protein.
803	Os3626	Os39025	0.99999	1.43e-10		Os803	MSTRG.16156.1		A2J10_01T0157300.1	transposon protein, Putative, CACTA, En/Spm sub-class, expressed	transposon protein, Putative, CACTA, En/Spm sub-class, expressed	Conserved hypothetical protein.
804	Os1129	Os36399	0.99999	1.43e-10		Os804	A2J10_12T0112800.1		MSTRG.16003.2	#N/A	#N/A	#N/A
805	Os5130	Os43594	0.99999	1.43e-10		Os805	MSTRG.19980.3		A2J10_11T0008600.1	LTPL11 - Protease inhibitor/seed storage/LTP family protein precursor, expressed	#N/A	Similar to Non-specific lipid-transfer protein 2B.
806	Os3626	Os42889	0.99999	1.44e-10		Os806	A2J10_07T0267500.1		MSTRG.14465.2	#N/A	#N/A	#N/A
807	Os5130	Os28250	0.99999	1.44e-10		Os807	A2J10_06T0206900.1		MSTRG.20301.5	#N/A	#N/A	#N/A
808	Os3626	Os43625	0.99999	1.44e-10		Os808	MSTRG.14320.7		A2J10_07T0150600.1	exonuclease, Putative, expressed	#N/A	#N/A
809	Os5130	Os38033	0.99999	1.44e-10		Os809	A2J10_01T0059300.1		MSTRG.7818.1	#N/A	ubiquitin carboxyl-terminal hydrolase, Putative, expressed	Peptidase C19, ubiquitin carboxyl-terminal hydrolase 2 family protein.
810	Os5130	Os40256	0.99999	1.46e-10		Os810	A2J10_02T0324700.1		A2J10_01T0015400.1	expressed protein	#N/A	#N/A
811	Os5130	Os25502	0.99999	1.46e-10		Os811	A2J10_11T0060200.1		A2J10_02T0384800.1	OsFBX62 - F-box domain containing protein, expressed	OsFBX62 - F-box domain containing protein, expressed	#N/A
812	Os1129	Os28994	0.99999	1.46e-10		Os812	MSTRG.2950.2		A2J10_01T0177900.3	PRAS-rich protein, Putative, expressed	PRAS-rich protein, Putative, expressed	Conserved hypothetical protein.
813	Os5130	Os43625	0.99999	1.47e-10		Os813	A2J10_01T0280300.1		MSTRG.16387.2	#N/A	#N/A	#N/A
814	Os5130	Os42676	0.99999	1.48e-10		Os814	MSTRG.8768.1		A2J10_12T0005500.1	ATPase, Putative, expressed	ATPase, Putative, expressed	ATPase, AAA-type, core domain containing protein.
815	Os1129	Os40745	0.99999	1.48e-10		Os815	MSTRG.19635.2		MSTRG.23700.1	#N/A	expressed protein	Conserved hypothetical protein.
816	Os1129	Os40317	0.99999	1.49e-10		Os816	A2J10_02T0071700.1		A2J10_01T0140500.1	universal stress protein domain containing protein, Putative, expressed	universal stress protein domain containing protein, Putative, expressed	UspA domain containing protein.
817	Os5130	Os25377	0.99999	1.49e-10		Os817	A2J10_05T0045800.1		A2J10_03T0025000.2	ribonuclease protein, Putative, expressed	#N/A	#N/A
818	Os3626	Os42745	0.99999	1.49e-10		Os818	MSTRG.19600.3		A2J10_11T0014100.1	no apical meristem protein, Putative, expressed	#N/A	#N/A
819	Os1129	Os42826	0.99999	1.5e-10		Os819	MSTRG.24452.1		A2J10_08T0100900.1	expressed protein	expressed protein	Similar to Leucine Rich Repeat family protein, expressed.
820	Os3626	Os31994	0.99999	1.5e-10		Os820	MSTRG.12023.1		A2J10_03T0076800.2	hydrolase, NUDIX family, domain containing protein, expressed	#N/A	#N/A
821	Os5130	Os25380	0.99999	1.5e-10		Os821	A2J10_04T0133200.1		A2J10_08T0127800.1	calmodulin binding protein, Putative, expressed	#N/A	#N/A
822	Os1129	Os17110	0.99999	1.51e-10		Os822	A2J10_02T0052000.1		MSTRG.20004.4	#N/A	#N/A	#N/A
823	Os1129	Os37781	0.99999	1.51e-10		Os823	MSTRG.22526.4		MSTRG.20774.6	#N/A	#N/A	#N/A
824	Os5130	Os37939	0.99999	1.52e-10		Os824	A2J10_09T0141700.1		A2J10_02T0218800.1	12-oxophytodienoate reductase, Putative, expressed	12-oxophytodienoate reductase, Putative, expressed	12-oxophytodienoic acid reductase (EC:1.3.1.-), Jasmonic acid (JA)-mediated defense signaling
825	Os1129	Os39441	0.99999	1.52e-10		Os825	MSTRG.20437.1		MSTRG.10362.2	#N/A	leucine-rich, Putative, expressed	#N/A
826	Os1129	Os43293	0.99999	1.52e-10		Os826	A2J10_06T0118100.1		MSTRG.530.1	#N/A	WRKY10, expressed	Similar to WRKY transcription factor 10.
827	Os1129	Os43103	0.99999	1.53e-10		Os827	A2J10_05T0046200.1		MSTRG.3408.1	#N/A	MYB family transcription factor, Putative, expressed	Similar to MybHv5 (Fragment).
828	Os3626	Os17346	0.99999	1.53e-10		Os828	MSTRG.7884.1		MSTRG.24179.5	#N/A	#N/A	#N/A
829	Os1129	Os42535	0.99999	1.53e-10		Os829	A2J10_02T0252900.1		MSTRG.12712.1	#N/A	Hypothetical protein	#N/A
830	Os1129	Os32435	0.99999	1.53e-10		Os830	A2J10_03T0317700.1		MSTRG.12151.1	#N/A	prenyltransferase, Putative, expressed	UbiA prenyltransferase family protein.
831	Os5130	Os43697	0.99999	1.53e-10		Os831	A2J10_06T0213100.2		MSTRG.6281.1	#N/A	#N/A	#N/A
832	Os3626	Os27319	0.99999	1.54e-10		Os832	A2J10_02T0053700.1		MSTRG.11483.19	#N/A	#N/A	#N/A
833	Os5130	Os43724	0.99999	1.54e-10		Os833	MSTRG.14523.2		MSTRG.21667.6	#N/A	#N/A	#N/A
834	Os5130	Os38626	0.99999	1.54e-10		Os834	A2J10_01T0365400.1		A2J10_04T0077300.1	OsWAK38 - OsWAK receptor-like protein kinase, expressed	OsWAK38 - OsWAK receptor-like protein kinase, expressed	#N/A
835	Os3626	Os42905	0.99999	1.55e-10		Os835	MSTRG.4940.5		A2J10_01T0082200.1	Putative expressed protein	SFT2, Putative, expressed	SFT2-like family protein.
836	Os1129	Os40200	0.99999	1.55e-10		Os836	A2J10_06T0288900.1		MSTRG.25597.7	#N/A	#N/A	#N/A
837	Os1129	Os39025	0.99999	1.55e-10		Os837	A2J10_01T0131000.1		MSTRG.11730.4	#N/A	#N/A	#N/A
838	Os5130	Os25483	0.99999	1.55e-10		Os838	A2J10_04T0139300.2		MSTRG.17376.1	#N/A	glyceraldehyde-3-phosphate dehydrogenase, Putative, expressed	Similar to GADPH (383 AA) (Fragment).
839	Os3626	Os24973	0.99999	1.55e-10		Os839	MSTRG.23853.1		MSTRG.17810.2	#N/A	#N/A	#N/A
840	Os1129	Os43623	0.99999	1.56e-10		Os840	MSTRG.14519.1		MSTRG.17430.1	#N/A	expressed protein	Hypothetical conserved gene.
841	Os1129	Os40134	0.99999	1.56e-10		Os841	MSTRG.3991.1		A2J10_01T0260000.1	cytochrome P450 72A1, Putative, expressed	#N/A	Hypothetical protein.
842	Os3626	Os37939	0.99999	1.56e-10		Os842	A2J10_01T0087800.1		MSTRG.24282.2	#N/A	#N/A	#N/A
843	Os5130	Os28211	0.99999	1.56e-10		Os843	A2J10_06T0075900.1		MSTRG.14760.3	#N/A	#N/A	#N/A
844	Os1129	Os44239	0.99999	1.57e-10		Os844	A2J10_04T0320000.1		MSTRG.9016.2	#N/A	#N/A	#N/A
845	Os3626	Os23679	0.99999	1.57e-10		Os845	A2J10_03T0309600.1		A2J10_01T0253300.2	DEAD/DEAH box helicase, Putative, expressed	#N/A	#N/A
846	Os1129	Os37356	0.99999	1.58e-10		Os846	A2J10_02T0219500.1		MSTRG.10868.2	#N/A	#N/A	#N/A
847	Os1129	Os32582	0.99999	1.58e-10		Os847	MSTRG.17369.1		MSTRG.4374.2	#N/A	#N/A	#N/A
848	Os3626	Os43663	0.99999	1.59e-10		Os848	A2J10_04T0137500.1		MSTRG.1444.3	#N/A	#N/A	#N/A
849	Os1129	Os25724	0.99999	1.59e-10		Os849	A2J10_01T0092700.1		MSTRG.1607.5	#N/A	#N/A	#N/A
850	Os3626	Os43697	0.99999	1.6e-10		Os850	A2J10_02T0232800.1		MSTRG.21744.6	#N/A	#N/A	#N/A
851	Os5130	Os43875	0.99999	1.6e-10		Os851	A2J10_07T0003500.1		A2J10_03T0396200.1	1-aminocyclopropane-1-carboxylate oxidase 2, Putative, expressed	1-aminocyclopropane-1-carboxylate oxidase 2, Putative, expressed	2OG-Fe(II) oxygenase domain containing protein.
852	Os5130	Os28510	0.99999	1.61e-10		Os852	A2J10_02T0148100.1		MSTRG.24245.1	#N/A	expressed protein	#N/A
853	Os3626	Os37729	0.99999	1.61e-10		Os853	A2J10_11T0155800.1		MSTRG.23163.2	#N/A	#N/A	#N/A
854	Os3626	Os43724	0.99999	1.62e-10		Os854	A2J10_09T0105100.1		MSTRG.15892.2	#N/A	#N/A	#N/A
855	Os5130	Os32968	0.99999	1.63e-10		Os855	A2J10_09T0165200.2		A2J10_11T0032700.1	DUF623 domain containing protein, expressed	DUF623 domain containing protein, expressed	Protein of unknown function DUF623, plant domain containing protein.
856	Os1129	Os43410	0.99999	1.63e-10		Os856	A2J10_07T0290200.2		A2J10_06T0254700.3	clathrin assembly protein, Putative, expressed	#N/A	#N/A
857	Os1129	Os42419	0.99999	1.64e-10		Os857	A2J10_03T0325200.2		A2J10_06T0069200.1	ethylene-responsive transcription factor, Putative, expressed	ethylene-responsive transcription factor, Putative, expressed	#N/A
858	Os3626	Os25483	0.99999	1.64e-10		Os858	A2J10_03T0387000.4		A2J10_03T0284800.1	phosphatase, Putative, expressed	phosphatase, Putative, expressed	Similar to Sugar-starvation induced protein (Fragment).
859	Os5130	Os43863	0.99999	1.64e-10		Os859	A2J10_02T0234000.1		MSTRG.11070.3	#N/A	#N/A	#N/A
860	Os5130	Os43847	0.999989	1.67e-10		Os860	A2J10_02T0351700.1		MSTRG.8960.1	#N/A	amino acid transporter, Putative, expressed	A member of the ATLa/AVT6 subfamily, Amino acid transporter-like 6 protein, Amino acid homeostasis, Modulation of the vacuolar storage of glutamine in roots
861	Os5130	Os10292	0.999989	1.68e-10		Os861	A2J10_02T0401900.1		MSTRG.4005.1	#N/A	#N/A	#N/A
862	Os5130	Os21859	0.999989	1.68e-10		Os862	MSTRG.7852.1		A2J10_03T0055300.1	OsWAK25 - OsWAK receptor-like protein kinase, expressed	OsWAK25 - OsWAK receptor-like protein kinase, expressed	Wall-associated kinase, Biotic stress response
863	Os1129	Os43503	0.999989	1.68e-10		Os863	MSTRG.12597.1		MSTRG.7340.2	#N/A	#N/A	#N/A
864	Os1129	Os44028	0.999989	1.69e-10		Os864	MSTRG.16977.1		MSTRG.20580.1	#N/A	#N/A	#N/A
865	Os3626	Os13774	0.999989	1.7e-10		Os865	MSTRG.20248.1		MSTRG.1298.2	#N/A	#N/A	#N/A
866	Os5130	Os25115	0.999989	1.7e-10		Os866	A2J10_07T0066200.1		MSTRG.19315.17	#N/A	#N/A	#N/A
867	Os3626	Os4607	0.999989	1.71e-10		Os867	A2J10_06T0214300.1		A2J10_03T0200500.1	cysteine proteinase inhibitor 8 precursor, Putative, expressed	cysteine proteinase inhibitor 8 precursor, Putative, expressed	Proteinase inhibitor I25, cystatin domain containing protein.
868	Os5130	Os19848	0.999989	1.71e-10		Os868	MSTRG.15932.2		MSTRG.3364.4	#N/A	#N/A	#N/A
869	Os1129	Os17195	0.999989	1.72e-10		Os869	A2J10_02T0314900.1		A2J10_01T0404100.1	UDP-glucoronosyl and UDP-glucosyl transferase, Putative, expressed	#N/A	#N/A
870	Os5130	Os42678	0.999989	1.73e-10		Os870	A2J10_06T0255200.1		A2J10_11T0178900.1	Putative WIP2 - Wound-induced protein precursor, expressed	WIP2 - Wound-induced protein precursor, expressed	Pathogenesis-related (PR) protein, Abiotic stress response, Disease resistance
871	Os1129	Os44092	0.999989	1.73e-10		Os871	A2J10_08T0053600.1		A2J10_03T0392000.2	calmodulin-like protein 1, Putative, expressed	#N/A	#N/A
872	Os5130	Os37294	0.999989	1.73e-10		Os872	A2J10_01T0286300.1		A2J10_04T0213200.1	expressed protein	expressed protein	#N/A
873	Os5130	Os35003	0.999989	1.74e-10		Os873	A2J10_02T0076700.1		A2J10_10T0051100.1	RNA recognition motif containing protein, expressed	RNA recognition motif containing protein, expressed	Conserved hypothetical protein.
874	Os28327	Os42913	0.999989	1.74e-10		Os874	A2J10_01T0010100.1		MSTRG.13990.5	#N/A	expressed protein	#N/A
875	Os5130	Os43844	0.999989	1.75e-10		Os875	A2J10_06T0079700.1		A2J10_01T0278700.1	WRKY15, expressed	#N/A	#N/A
876	Os5130	Os20787	0.999989	1.75e-10		Os876	A2J10_01T0020000.1		A2J10_01T0321200.1	UDP-glucoronosyl and UDP-glucosyl transferase domain containing protein, expressed	UDP-glucoronosyl and UDP-glucosyl transferase domain containing protein, expressed	UDP-glucuronosyl/UDP-glucosyltransferase family protein.
877	Os3626	Os31924	0.999989	1.75e-10		Os877	A2J10_02T0338400.1		A2J10_08T0214500.1	aminotransferase, Putative, expressed	aminotransferase, Putative, expressed	Glutamate 1-semialdehyde 2,1-aminomutase, Tetrapyrrole biosynthesis
878	Os5130	Os39136	0.999989	1.76e-10		Os878	A2J10_10T0140500.1		MSTRG.6060.4	#N/A	#N/A	#N/A
879	Os1129	Os32624	0.999989	1.76e-10		Os879	MSTRG.21279.1		MSTRG.15413.3	#N/A	#N/A	#N/A
880	Os5130	Os43756	0.999989	1.77e-10		Os880	A2J10_03T0329600.1		A2J10_06T0288000.2	histone acetyltransferase HAC1, Putative, expressed	Putative TAZ zinc finger family protein, expressed	#N/A
881	Os1129	Os32444	0.999989	1.78e-10		Os881	A2J10_01T0472900.1		MSTRG.11219.4	#N/A	#N/A	#N/A
882	Os5130	Os21583	0.999989	1.78e-10		Os882	MSTRG.9908.7		A2J10_05T0107100.1	ubiquinol-cytochrome c reductase complex 6.7 kDa protein, Putative, expressed	#N/A	#N/A
883	Os3626	Os43936	0.999989	1.79e-10		Os883	MSTRG.19748.2		MSTRG.4039.3	#N/A	#N/A	#N/A
884	Os5130	Os31651	0.999989	1.79e-10		Os884	MSTRG.13254.1		A2J10_02T0298000.1	Conserved hypothetical protein	Conserved hypothetical protein	Conserved hypothetical protein.
885	Os3626	Os28851	0.999989	1.8e-10		Os885	A2J10_03T0186700.1		MSTRG.21152.5	#N/A	#N/A	#N/A
886	Os5130	Os38826	0.999989	1.8e-10		Os886	MSTRG.18921.1		MSTRG.26083.1	#N/A	AP2 domain containing protein, expressed	Similar to Ethylene-responsive transcription factor 5 (Ethylene-responsive element binding factor 5) (EREBP-5) (AtERF5).
887	Os3626	Os37398	0.999989	1.81e-10		Os887	MSTRG.5765.5		MSTRG.3669.2	#N/A	#N/A	#N/A
888	Os1129	Os25815	0.999989	1.81e-10		Os888	MSTRG.5306.1		A2J10_01T0335500.1	gibberellin 2-beta-dioxygenase, Putative, expressed	gibberellin 2-beta-dioxygenase, Putative, expressed	GA 2-oxidase3, GA metabolism
889	Os1129	Os42069	0.999989	1.82e-10		Os889	A2J10_05T0087300.1		MSTRG.11301.7	#N/A	#N/A	#N/A
890	Os1129	Os43483	0.999989	1.82e-10		Os890	MSTRG.21891.2		MSTRG.19671.3	#N/A	#N/A	#N/A
891	Os5130	Os5585	0.999989	1.83e-10		Os891	MSTRG.26941.2		A2J10_11T0019400.1	Conserved hypothetical protein	#N/A	#N/A
892	Os1129	Os35797	0.999989	1.83e-10		Os892	MSTRG.17299.8		A2J10_01T0385800.2	Os5bglu19 - beta-glucosidase homologue, similar to G. max isohydroxyurate hydrolase, expressed	#N/A	#N/A
893	Os1129	Os18110	0.999989	1.83e-10		Os893	A2J10_03T0327700.1		MSTRG.12567.1	#N/A	#N/A	#N/A
894	Os3626	Os39411	0.999989	1.84e-10		Os894	A2J10_01T0215700.1		MSTRG.27217.1	#N/A	expressed protein	Protein of unknown function DUF594 domain containing protein.
895	Os5130	Os40778	0.999989	1.84e-10		Os895	MSTRG.12145.1		A2J10_06T0031500.1	Putative expressed protein	#N/A	Conserved hypothetical protein.
896	Os3626	Os43863	0.999989	1.84e-10		Os896	A2J10_04T0155800.1		MSTRG.25666.1	#N/A	#N/A	#N/A
897	Os5130	Os43729	0.999989	1.85e-10		Os897	A2J10_01T0347800.1		A2J10_01T0254800.1	UDP-glucoronosyl and UDP-glucosyl transferase domain containing protein, expressed	#N/A	#N/A
898	Os5130	Os38817	0.999989	1.86e-10		Os898	A2J10_03T0127400.1		A2J10_04T0236500.2	AP2 domain containing protein, expressed	AP2 domain containing protein, expressed	APETALA-2-like transcription Factor, Control of the abscisic acid (ABA)/gibberellin (GA) balance
899	Os1129	Os43396	0.999989	1.86e-10		Os899	A2J10_02T0171000.4		A2J10_01T0410300.1	ureidoglycolate hydrolase, Putative, expressed	ureidoglycolate hydrolase, Putative, expressed	Similar to predicted protein.
900	Os3626	Os25575	0.999989	1.86e-10		Os900	A2J10_01T0292500.1		MSTRG.1315.11	#N/A	#N/A	#N/A
901	Os1129	Os44249	0.999989	1.87e-10		Os901	MSTRG.5114.4		A2J10_11T0159700.1	expressed protein	#N/A	#N/A
902	Os1129	Os43366	0.999989	1.87e-10		Os902	A2J10_06T0265400.1		MSTRG.5570.2	#N/A	#N/A	#N/A
903	Os3626	Os33013	0.999989	1.88e-10		Os903	MSTRG.3050.3		MSTRG.10452.2	#N/A	#N/A	#N/A
904	Os3626	Os19316	0.999989	1.88e-10		Os904	A2J10_10T0169600.1		A2J10_09T0140500.1	bHelix-loop-helix transcription factor, Putative, expressed	bHelix-loop-helix transcription factor, Putative, expressed	Basic helix-loop-helix (bHLH) transcription factor, Control of root thickness and root length, Response to abiotic stresses
905	Os1129	Os38431	0.999989	1.89e-10		Os905	A2J10_12T0002400.1		MSTRG.15399.4	#N/A	#N/A	#N/A
906	Os3626	Os30264	0.999989	1.89e-10		Os906	A2J10_11T0084400.1		A2J10_01T0059400.3	Conserved hypothetical protein	#N/A	#N/A
907	Os3626	Os40034	0.999989	1.89e-10		Os907	A2J10_08T0080400.1		A2J10_10T0180100.1	metalloendoproteinase 1 precursor, Putative, expressed	#N/A	#N/A
908	Os1129	Os8153	0.999989	1.9e-10		Os908	A2J10_01T0068800.1		MSTRG.18173.3	#N/A	#N/A	#N/A
909	Os3626	Os33697	0.999989	1.9e-10		Os909	A2J10_07T0127100.1		MSTRG.17508.3	#N/A	#N/A	#N/A
910	Os1129	Os24780	0.999989	1.9e-10		Os910	MSTRG.16007.1		A2J10_11T0133800.1	expressed protein	#N/A	#N/A
911	Os5130	Os27031	0.999989	1.9e-10		Os911	MSTRG.24660.1		A2J10_07T0079400.1	laccase precursor protein, Putative, expressed	laccase precursor protein, Putative, expressed	#N/A
912	Os3626	Os42888	0.999989	1.91e-10		Os912	A2J10_01T0077600.1		A2J10_04T0117400.1	Hypothetical protein	#N/A	#N/A
913	Os3626	Os28886	0.999989	1.91e-10		Os913	MSTRG.26181.1		MSTRG.4842.1	#N/A	#N/A	#N/A
914	Os1129	Os18220	0.999989	1.91e-10		Os914	A2J10_09T0138400.1		A2J10_12T0191900.1	nodulin, Putative, expressed	nodulin, Putative, expressed	Nodulin-like domain containing protein.
915	Os3626	Os42711	0.999989	1.91e-10		Os915	A2J10_03T0256900.1		A2J10_07T0236900.2	strictosidine synthase, Putative, expressed	#N/A	#N/A
916	Os3626	Os39821	0.999989	1.91e-10		Os916	A2J10_04T0109900.2		A2J10_01T0141000.2	expressed protein	expressed protein	Conserved hypothetical protein.
917	Os5130	Os31953	0.999989	1.91e-10		Os917	MSTRG.1413.1		A2J10_06T0182300.2	expressed protein	#N/A	#N/A
918	Os1129	Os18762	0.999989	1.91e-10		Os918	MSTRG.1564.1		A2J10_10T0134100.1	cytochrome P450, Putative, expressed	#N/A	#N/A
919	Os5130	Os43861	0.999989	1.94e-10		Os919	MSTRG.15468.1		A2J10_07T0251700.1	heat shock protein DnaJ, Putative, expressed	heat shock protein DnaJ, Putative, expressed	#N/A
920	Os1129	Os14935	0.999989	1.94e-10		Os920	MSTRG.16110.1		MSTRG.19029.6	#N/A	#N/A	#N/A
921	Os5130	Os24941	0.999989	1.95e-10		Os921	MSTRG.3161.2		A2J10_04T0086400.3	SAM domain family protein, expressed	#N/A	#N/A
922	Os5130	Os25447	0.999989	1.95e-10		Os922	MSTRG.11347.3		A2J10_11T0072800.1	gibberellin receptor GID1L2, Putative, expressed	#N/A	#N/A
923	Os1129	Os40606	0.999989	1.95e-10		Os923	MSTRG.9476.1		MSTRG.6063.2	#N/A	#N/A	#N/A
924	Os5130	Os37416	0.999989	1.96e-10		Os924	MSTRG.7883.1		MSTRG.2324.2	#N/A	#N/A	#N/A
925	Os1129	Os13637	0.999989	1.97e-10		Os925	A2J10_03T0324000.1		MSTRG.732.5	#N/A	#N/A	#N/A
926	Os4820	Os28842	0.999989	1.98e-10		Os926	A2J10_02T0199900.1		A2J10_01T0017300.1	senescence-induced receptor-like serine/threonine-protein kinase precursor, Putative, expressed	protein kinase domain containing protein, expressed	Putative Bowman Birk trypsin inhibitor
927	Os5130	Os32884	0.999988	1.99e-10		Os927	MSTRG.13077.1		MSTRG.19079.2	#N/A	#N/A	#N/A
928	Os5130	Os33094	0.999988	1.99e-10		Os928	A2J10_05T0130600.1		MSTRG.24906.2	#N/A	#N/A	#N/A
929	Os5130	Os25007	0.999988	1.99e-10		Os929	MSTRG.376.2		MSTRG.13588.4	#N/A	#N/A	#N/A
930	Os1129	Os25145	0.999988	2e-10		Os930	MSTRG.10858.1		A2J10_07T0143300.1	peptide-Nasparagine amidase, Putative, expressed	peptide-Nasparagine amidase, Putative, expressed	Transglutaminase-like domain containing protein.
931	Os1129	Os25358	0.999988	2e-10		Os931	A2J10_05T0033000.1		A2J10_04T0241300.2	Putative NAD dependent epimerase/dehydratase family domain containing protein, expressed	#N/A	#N/A
932	Os1129	Os25643	0.999988	2e-10		Os932	A2J10_03T0368300.1		A2J10_08T0135700.1	Putative expressed protein	#N/A	#N/A
933	Os5130	Os43820	0.999988	2e-10		Os933	A2J10_05T0227400.1		MSTRG.21429.5	#N/A	#N/A	#N/A
934	Os1129	Os18005	0.999988	2e-10		Os934	MSTRG.14666.1		A2J10_07T0261100.1	gibberellin receptor GID1L2, Putative, expressed	gibberellin receptor GID1L2, Putative, expressed	Alpha/beta hydrolase fold-3 domain containing protein.
935	Os1129	Os37744	0.999988	2.01e-10		Os935	A2J10_02T0146800.1		MSTRG.8535.2	#N/A	#N/A	#N/A
936	Os5130	Os35488	0.999988	2.02e-10		Os936	MSTRG.12472.1		A2J10_01T0020500.1	expressed protein	expressed protein	Protein of unknown function DUF1666 family protein.
937	Os5130	Os43760	0.999988	2.02e-10		Os937	MSTRG.4537.4		MSTRG.16989.4	#N/A	#N/A	#N/A
938	Os3626	Os42678	0.999988	2.03e-10		Os938	A2J10_04T0213500.1		MSTRG.4706.1	#N/A	#N/A	#N/A
939	Os1129	Os3363	0.999988	2.03e-10		Os939	MSTRG.16667.1		A2J10_03T0184000.2	Conserved hypothetical protein	#N/A	#N/A
940	Os1129	Os42521	0.999988	2.03e-10		Os940	A2J10_03T0269700.2		A2J10_05T0120200.2	CAAX amino terminal protease family protein, Putative, expressed	#N/A	#N/A
941	Os5130	Os42515	0.999988	2.06e-10		Os941	A2J10_06T0185500.2		A2J10_04T0199700.2	transmembrane amino acid transporter protein, Putative, expressed	#N/A	#N/A
942	Os3626	Os43844	0.999988	2.07e-10		Os942	A2J10_07T0261000.1		MSTRG.951.5	#N/A	#N/A	#N/A
943	Os1129	Os22605	0.999988	2.08e-10		Os943	MSTRG.17594.1		A2J10_11T0183900.1	40S ribosomal protein S9-2, Putative, expressed	#N/A	#N/A
944	Os3626	Os25547	0.999988	2.1e-10		Os944	A2J10_06T0294000.1		MSTRG.6386.1	#N/A	#N/A	#N/A
945	Os25570	Os26224	0.999988	2.1e-10		Os945	MSTRG.21124.1		A2J10_02T0387300.1	Putative STE_MEK_ste7_MAP2K.5 - STE kinases include homologs to sterile 7, sterile 11 and sterile 20 from yeast,expressed	#N/A	#N/A
946	Os1129	Os38027	0.999988	2.1e-10		Os946	MSTRG.17840.1		MSTRG.17114.7	#N/A	#N/A	#N/A
947	Os1129	Os42331	0.999988	2.1e-10		Os947	A2J10_08T0137300.1		A2J10_03T0323500.1	UDP-glucoronosyl and UDP-glucosyl transferase domain containing protein, expressed	UDP-glucoronosyl and UDP-glucosyl transferase domain containing protein, expressed	UDP-glucuronosyl/UDP-glucosyltransferase domain containing protein.
948	Os3626	Os17718	0.999988	2.1e-10		Os948	A2J10_10T0112000.1		A2J10_03T0049800.1	membrane protein, Putative, expressed	membrane protein, Putative, expressed	Uncharacterised conserved protein UCP037471 domain containing protein.
949	Os3626	Os20578	0.999988	2.1e-10		Os949	A2J10_01T0295500.1		A2J10_01T0061100.1	expressed protein	expressed protein	Hypothetical conserved gene.
950	Os3626	Os38767	0.999988	2.11e-10		Os950	A2J10_01T0163100.1		A2J10_09T0019800.1	zinc finger, C3HC4 type domain containing protein, expressed	zinc finger, C3HC4 type domain containing protein, expressed	Zinc finger, RING/FYVE/PHD-type domain containing protein.
951	Os1129	Os43977	0.999988	2.12e-10		Os951	A2J10_07T0193500.1		MSTRG.11698.1	#N/A	#N/A	#N/A
952	Os5130	Os37985	0.999988	2.13e-10		Os952	MSTRG.9474.1		A2J10_10T0180300.3	flavonol synthase/flavanone 3-hydroxylase, Putative, expressed	flavonol synthase/flavanone 3-hydroxylase, Putative, expressed	2OG-Fe(II) oxygenase domain containing protein.
953	Os3626	Os39299	0.999988	2.14e-10		Os953	MSTRG.4588.1		A2J10_06T0110400.1	UDP-glucoronosyl and UDP-glucosyl transferase domain containing protein, expressed	UDP-glucoronosyl and UDP-glucosyl transferase domain containing protein, expressed	C-glucosyltransferase, Flavone-C-glycoside synthesis
954	Os3626	Os42882	0.999988	2.15e-10		Os954	MSTRG.24914.1		A2J10_03T0138800.1	WRKY79, expressed	WRKY79, expressed	Similar to WRKY1 (WRKY transcription factor 17).
955	Os3626	Os35132	0.999988	2.15e-10		Os955	A2J10_02T0004600.1		A2J10_03T0115400.1	WD40-like Beta Propeller Repeat family protein, expressed	#N/A	Hypothetical conserved gene.
956	Os1129	Os15688	0.999988	2.16e-10		Os956	A2J10_08T0120800.1		MSTRG.16837.1	#N/A	leucoanthocyanidin reductase, Putative, expressed	Similar to H0323C08.16 protein.
957	Os5130	Os30835	0.999988	2.17e-10		Os957	A2J10_11T0170000.1		A2J10_03T0001600.1	Putative expressed protein	#N/A	#N/A
958	Os1129	Os27826	0.999988	2.18e-10		Os958	MSTRG.10109.2		A2J10_10T0114300.2	expressed protein	#N/A	#N/A
959	Os5130	Os22333	0.999988	2.19e-10		Os959	A2J10_01T0033700.1		MSTRG.21423.1	#N/A	bZIP transcription factor domain containing protein, expressed	Basic leucine zipper (bZIP) transcription factor, Negative regulator of cold and drought stress response
960	Os5130	Os37544	0.999988	2.19e-10		Os960	A2J10_02T0225200.1		A2J10_04T0093500.1	ACT domain containing protein, expressed	#N/A	#N/A
961	Os1129	Os6580	0.999988	2.2e-10		Os961	A2J10_03T0394800.1		A2J10_06T0200800.1	Conserved hypothetical protein	#N/A	#N/A
962	Os5130	Os38109	0.999988	2.21e-10		Os962	A2J10_06T0114400.1		A2J10_12T0053900.1	outer envelope protein, Putative, expressed	outer envelope protein, Putative, expressed	Conserved hypothetical protein.
963	Os3626	Os23872	0.999988	2.21e-10		Os963	MSTRG.12287.5		A2J10_03T0371500.1	expressed protein	expressed protein	Hypothetical conserved gene.
964	Os3626	Os43727	0.999988	2.21e-10		Os964	MSTRG.1111.1		MSTRG.6902.1	#N/A	expressed protein	#N/A
965	Os5130	Os28853	0.999988	2.21e-10		Os965	A2J10_04T0007800.1		A2J10_09T0057700.1	SWIM zinc finger family protein, Putative, expressed	#N/A	#N/A
966	Os3626	Os15688	0.999988	2.22e-10		Os966	A2J10_06T0184400.1		MSTRG.13027.1	#N/A	#N/A	#N/A
967	Os1129	Os28675	0.999988	2.22e-10		Os967	A2J10_11T0153100.1		A2J10_10T0161300.1	shikimate/quinate 5-dehydrogenase, Putative, expressed	shikimate/quinate 5-dehydrogenase, Putative, expressed	NAD(P)-binding domain containing protein.
968	Os5130	Os23995	0.999988	2.23e-10		Os968	A2J10_12T0016800.1		A2J10_02T0004000.1	lactate/malate dehydrogenase, Putative, expressed	#N/A	Conserved hypothetical protein.
969	Os1129	Os17944	0.999988	2.23e-10		Os969	A2J10_10T0182800.1		A2J10_01T0304800.2	transport protein particle component, Bet3, domain containing protein, expressed	#N/A	#N/A
970	Os1129	Os43648	0.999988	2.23e-10		Os970	A2J10_01T0368700.1		A2J10_03T0355200.1	Putative Cupin domain containing protein, expressed	Cupin domain containing protein, expressed	Similar to Germin-like protein subfamily T member 1 precursor.
971	Os1129	Os34303	0.999988	2.24e-10		Os971	A2J10_01T0497900.1		A2J10_07T0109100.1	dynamin family protein, Putative, expressed	dynamin family protein, Putative, expressed	Dynamin family protein.
972	Os1129	Os21712	0.999988	2.24e-10		Os972	A2J10_07T0146800.3		MSTRG.4187.2	#N/A	#N/A	#N/A
973	Os3626	Os32164	0.999988	2.24e-10		Os973	A2J10_05T0006700.1		A2J10_04T0279000.1	adenylate kinase, Putative, expressed	#N/A	#N/A
974	Os5130	Os37977	0.999988	2.25e-10		Os974	A2J10_12T0048700.1		MSTRG.22907.1	#N/A	#N/A	#N/A
975	Os5130	Os42722	0.999988	2.28e-10		Os975	A2J10_01T0081200.2		A2J10_08T0170500.1	cytochrome P450, Putative, expressed	#N/A	#N/A
976	Os3626	Os29839	0.999988	2.28e-10		Os976	MSTRG.19976.1		A2J10_08T0039500.1	Putative expressed protein	expressed protein	Similar to predicted protein.
977	Os5130	Os37575	0.999988	2.28e-10		Os977	MSTRG.3489.1		MSTRG.745.3	#N/A	#N/A	#N/A
978	Os1129	Os43108	0.999988	2.29e-10		Os978	A2J10_09T0156100.2		A2J10_09T0078100.1	expressed protein	#N/A	#N/A
979	Os3626	Os29896	0.999988	2.3e-10		Os979	A2J10_09T0057900.1		MSTRG.26082.1	#N/A	AP2 domain containing protein, expressed	Pathogenesis-related transcriptional factor and ERF domain containing protein.
980	Os5130	Os43720	0.999988	2.3e-10		Os980	A2J10_02T0374000.1		MSTRG.10074.4	#N/A	#N/A	#N/A
981	Os5130	Os42903	0.999988	2.3e-10		Os981	A2J10_12T0171400.4		MSTRG.17376.3	#N/A	#N/A	#N/A
982	Os28327	Os43667	0.999988	2.3e-10		Os982	MSTRG.20800.1		MSTRG.9413.1	#N/A	Leucine Rich Repeat family protein, expressed	Similar to Leucine Rich Repeat family protein.
983	Os5130	Os22052	0.999988	2.31e-10		Os983	MSTRG.19246.6		MSTRG.9090.6	#N/A	#N/A	#N/A
984	Os1129	Os32441	0.999988	2.31e-10		Os984	A2J10_08T0126000.1		A2J10_03T0139400.2	pentatricopeptide repeat domain containing protein, Putative, expressed	#N/A	#N/A
985	Os25155	Os33059	0.999988	2.32e-10		Os985	MSTRG.26981.1		A2J10_12T0194500.5	sodium/hydrogen exchanger 7, Putative, expressed	#N/A	#N/A
986	Os5130	Os25427	0.999988	2.32e-10		Os986	MSTRG.19978.1		A2J10_12T0186700.1	thaumatin, Putative, expressed	thaumatin, Putative, expressed	#N/A
987	Os5130	Os43817	0.999988	2.33e-10		Os987	MSTRG.5469.2		MSTRG.21729.5	#N/A	#N/A	#N/A
988	Os1129	Os44266	0.999988	2.34e-10		Os988	MSTRG.24046.1		A2J10_06T0139600.1	DNA-directed RNA polymerase subunit beta, Putative, expressed	DNA-directed RNA polymerase subunit beta, Putative, expressed	#N/A
989	Os3626	Os15748	0.999988	2.34e-10		Os989	MSTRG.7270.1		MSTRG.20681.5	#N/A	#N/A	#N/A
990	Os5130	Os43747	0.999988	2.34e-10		Os990	A2J10_01T0065400.1		MSTRG.12194.9	#N/A	#N/A	#N/A
991	Os3626	Os14463	0.999987	2.35e-10		Os991	A2J10_03T0121000.1		MSTRG.11004.1	#N/A	#N/A	#N/A
992	Os1129	Os28575	0.999987	2.35e-10		Os992	A2J10_06T0110300.1		A2J10_03T0095600.1	OsAPx1 - Cytosolic Ascorbate Peroxidase encoding gene 1-8, expressed	#N/A	#N/A
993	Os1129	Os32090	0.999987	2.35e-10		Os993	A2J10_02T0298500.1		A2J10_01T0494000.1	glutathione S-transferase, Putative, expressed	glutathione S-transferase, Putative, expressed	Hypothetical protein.
994	Os5130	Os40021	0.999987	2.36e-10		Os994	MSTRG.12032.1		MSTRG.26585.1	#N/A	#N/A	#N/A
995	Os5130	Os43824	0.999987	2.37e-10		Os995	MSTRG.3609.5		MSTRG.22992.6	#N/A	ABC-2 type transporter family protein, expressed	#N/A
996	Os5130	Os29663	0.999987	2.38e-10		Os996	MSTRG.7844.1		A2J10_06T0061500.1	Putative expressed protein	#N/A	#N/A
997	Os1129	Os32538	0.999987	2.38e-10		Os997	MSTRG.23906.1		A2J10_02T0201600.1	zinc finger A20 and AN1 domain-containing stress-associated protein, Putative, expressed	zinc finger A20 and AN1 domain-containing stress-associated protein, Putative, expressed	Stress-associated protein 5, A20/AN1 zinc finger domain protein, Heat resistance and seed quality
998	Os3626	Os34255	0.999987	2.39e-10		Os998	MSTRG.15428.1		A2J10_02T0302700.1	NADPH-dependent oxidoreductase, Putative, expressed	#N/A	#N/A
999	Os3626	Os10555	0.999987	2.4e-10		Os999	A2J10_07T0285100.1		A2J10_10T0082900.1	ribulose bisphosphate carboxylase large chain precursor, Putative, expressed	ribulose bisphosphate carboxylase large chain precursor, Putative, expressed	#N/A
1000	Os5130	Os40354	0.999987	2.4e-10		Os1000	A2J10_06T0053500.1		A2J10_06T0057500.4	Putative protein of unknown function DUF1296 domain containing protein, expressed	#N/A	#N/A
1001	Os3626	Os27294	0.999987	2.4e-10		Os1001	MSTRG.16045.4		MSTRG.18465.1	#N/A	#N/A	#N/A
1002	Os3626	Os28279	0.999987	2.41e-10		Os1002	MSTRG.13016.7		MSTRG.2910.1	#N/A	#N/A	#N/A
1003	Os1129	Os43359	0.999987	2.41e-10		Os1003	A2J10_12T0016000.1		MSTRG.15391.1	#N/A	#N/A	Similar to OSIGBa0107E14.3 protein.
1004	Os3626	Os32968	0.999987	2.42e-10		Os1004	A2J10_04T0324500.1		MSTRG.23045.1	#N/A	#N/A	Hypothetical protein.
1005	Os3626	Os33529	0.999987	2.42e-10		Os1005	A2J10_10T0058900.1		MSTRG.5327.1	#N/A	HCF152, Putative, expressed	Pentatricopeptide repeat domain containing protein.
1006	Os3626	Os31953	0.999987	2.43e-10		Os1006	A2J10_11T0084000.1		A2J10_04T0212600.1	Conserved hypothetical protein	#N/A	#N/A
1007	Os1129	Os42935	0.999987	2.43e-10		Os1007	A2J10_05T0173400.2		A2J10_02T0327300.1	expressed protein	#N/A	#N/A
1008	Os3626	Os41003	0.999987	2.44e-10		Os1008	MSTRG.17041.2		A2J10_09T0104300.1	expressed protein	expressed protein	Hypothetical conserved gene.
1009	Os1129	Os37290	0.999987	2.45e-10		Os1009	A2J10_03T0169400.1		A2J10_01T0346900.1	expressed protein	#N/A	#N/A
1010	Os3626	Os13698	0.999987	2.45e-10		Os1010	A2J10_10T0098100.1		MSTRG.6006.1	#N/A	#N/A	#N/A
1011	Os5130	Os43829	0.999987	2.47e-10		Os1011	MSTRG.3777.1		A2J10_06T0209200.1	Conserved hypothetical protein	#N/A	#N/A
1012	Os5130	Os32094	0.999987	2.47e-10		Os1012	MSTRG.6175.1		MSTRG.15541.3	#N/A	#N/A	#N/A
1013	Os5130	Os18007	0.999987	2.48e-10		Os1013	A2J10_07T0148900.2		A2J10_09T0163900.1	auxin efflux carrier component, Putative, expressed	auxin efflux carrier component, Putative, expressed	Auxin efflux carrier domain containing protein.
1014	Os5130	Os19976	0.999987	2.48e-10		Os1014	MSTRG.10577.1		A2J10_02T0232600.1	white-brown complex homolog protein 7, Putative, expressed	#N/A	#N/A
1015	Os1129	Os42711	0.999987	2.49e-10		Os1015	A2J10_03T0093600.1		MSTRG.23855.4	#N/A	#N/A	#N/A
1016	Os1129	Os27319	0.999987	2.49e-10		Os1016	A2J10_11T0241300.1		A2J10_07T0049700.1	ATPase, Putative, expressed	ATPase, Putative, expressed	ATPase, AAA-type, core domain containing protein.
1017	Os5130	Os14960	0.999987	2.5e-10		Os1017	MSTRG.9075.1		MSTRG.4077.10	#N/A	#N/A	#N/A
1018	Os5130	Os42845	0.999987	2.51e-10		Os1018	A2J10_08T0016400.1		A2J10_04T0272800.1	expressed protein	#N/A	#N/A
1019	Os1129	Os42999	0.999987	2.52e-10		Os1019	A2J10_01T0054700.3		A2J10_08T0135800.1	plant protein of unknown function domain containing protein, expressed	plant protein of unknown function domain containing protein, expressed	Protein of unknown function DUF247, plant family protein.
1020	Os5130	Os42646	0.999987	2.52e-10		Os1020	A2J10_02T0072400.1		MSTRG.2811.3	#N/A	#N/A	#N/A
1021	Os1129	Os44256	0.999987	2.53e-10		Os1021	MSTRG.6604.3		MSTRG.16267.4	#N/A	#N/A	#N/A
1022	Os5130	Os43617	0.999987	2.53e-10		Os1022	A2J10_11T0134500.1		A2J10_09T0029500.1	Conserved hypothetical protein	#N/A	#N/A
1023	Os1129	Os38991	0.999987	2.54e-10		Os1023	MSTRG.7875.1		A2J10_01T0079200.3	expressed protein	#N/A	#N/A
1024	Os3626	Os37416	0.999987	2.54e-10		Os1024	MSTRG.7427.1		A2J10_07T0067900.1	expressed protein	expressed protein	Hypothetical conserved gene.
1025	Os5130	Os40235	0.999987	2.55e-10		Os1025	MSTRG.18603.9		MSTRG.20032.5	#N/A	#N/A	#N/A
1026	Os3626	Os25741	0.999987	2.55e-10		Os1026	A2J10_11T0011100.1		MSTRG.11652.1	#N/A	expressed protein	Hypothetical protein.
1027	Os1129	Os7018	0.999987	2.56e-10		Os1027	MSTRG.14786.3		A2J10_01T0076900.1	amino acid permease family protein, Putative, expressed	amino acid permease family protein, Putative, expressed	Similar to Cationic amino acid transporter (Fragment).
1028	Os5130	Os7018	0.999987	2.56e-10		Os1028	MSTRG.24432.1		A2J10_02T0331200.1	aspartic proteinase nepenthesin-2 precursor, Putative, expressed	aspartic proteinase nepenthesin-2 precursor, Putative, expressed	Hypothetical protein.
1029	Os1129	Os18942	0.999987	2.57e-10		Os1029	MSTRG.20813.1		A2J10_03T0022100.1	expressed protein	#N/A	#N/A
1030	Os3626	Os7288	0.999987	2.58e-10		Os1030	MSTRG.1775.1		MSTRG.24819.2	#N/A	#N/A	#N/A
1031	Os3626	Os43956	0.999987	2.58e-10		Os1031	MSTRG.10020.5		A2J10_09T0081500.3	DEAD-box ATP-dependent RNA helicase, Putative, expressed	#N/A	#N/A
1032	Os5130	Os28588	0.999987	2.59e-10		Os1032	A2J10_04T0014000.1		MSTRG.18257.1	#N/A	G-protein alpha subunit, Putative, expressed	#N/A
1033	Os5130	Os42889	0.999987	2.59e-10		Os1033	A2J10_06T0182300.3		A2J10_02T0102300.1	UDP-glucoronosyl and UDP-glucosyl transferase domain containing protein, expressed	#N/A	#N/A
1034	Os3626	Os28491	0.999987	2.61e-10		Os1034	A2J10_01T0218700.1		MSTRG.16690.2	#N/A	#N/A	#N/A
1035	Os3626	Os43694	0.999987	2.61e-10		Os1035	MSTRG.20735.1		MSTRG.24109.5	#N/A	#N/A	#N/A
1036	Os1129	Os42149	0.999987	2.61e-10		Os1036	A2J10_02T0259200.1		A2J10_03T0015900.1	hydrolase, alpha/beta fold family protein, Putative, expressed	hydrolase, alpha/beta fold family protein, Putative, expressed	Similar to Hydrolase.
1037	Os3626	Os4772	0.999987	2.62e-10		Os1037	A2J10_01T0458900.2		MSTRG.6429.1	#N/A	#N/A	#N/A
1038	Os1129	Os43961	0.999987	2.63e-10		Os1038	MSTRG.754.2		MSTRG.26716.3	#N/A	#N/A	#N/A
1039	Os5130	Os28522	0.999987	2.64e-10		Os1039	A2J10_09T0069300.1		MSTRG.2078.1	#N/A	#N/A	Transposon, En/Spm-like domain containing protein.
1040	Os5130	Os9728	0.999987	2.64e-10		Os1040	MSTRG.25863.1		A2J10_05T0150800.1	mTERF domain containing protein, expressed	mTERF domain containing protein, expressed	Mitochodrial transcription termination factor-related family protein.
1041	Os1129	Os42130	0.999987	2.67e-10		Os1041	MSTRG.18209.1		MSTRG.10489.9	#N/A	#N/A	#N/A
1042	Os1129	Os32674	0.999987	2.69e-10		Os1042	A2J10_11T0067600.1		A2J10_05T0183300.1	Conserved hypothetical protein	#N/A	#N/A
1043	Os1129	Os27648	0.999987	2.7e-10		Os1043	A2J10_04T0150100.2		A2J10_06T0188200.1	receptor-like kinase, Putative, expressed	#N/A	#N/A
1044	Os5130	Os18208	0.999987	2.7e-10		Os1044	A2J10_10T0000400.1		MSTRG.3864.2	#N/A	#N/A	#N/A
1045	Os1129	Os25612	0.999987	2.7e-10		Os1045	MSTRG.20414.1		A2J10_11T0192700.1	expressed protein	#N/A	#N/A
1046	Os1129	Os38962	0.999987	2.71e-10		Os1046	MSTRG.1662.1		MSTRG.11582.2	#N/A	#N/A	#N/A
1047	Os1129	Os22244	0.999987	2.72e-10		Os1047	MSTRG.8564.1		MSTRG.24936.3	#N/A	#N/A	#N/A
1048	Os5130	Os34303	0.999987	2.72e-10		Os1048	A2J10_04T0191500.1		MSTRG.8883.1	#N/A	FGGY family of carbohydrate kinases, Putative, expressed	Carbohydrate kinase, FGGY domain containing protein.
1049	Os3626	Os43779	0.999987	2.72e-10		Os1049	MSTRG.17325.1		MSTRG.7466.2	#N/A	expressed protein	#N/A
1050	Os3626	Os42520	0.999986	2.74e-10		Os1050	A2J10_06T0237800.2		MSTRG.18088.1	#N/A	#N/A	#N/A
1051	Os5130	Os43836	0.999986	2.74e-10		Os1051	A2J10_02T0341100.1		A2J10_02T0151600.2	Putative expressed protein	#N/A	#N/A
1052	Os5130	Os25152	0.999986	2.74e-10		Os1052	MSTRG.14975.1		A2J10_11T0115000.4	protein kinase domain containing protein, expressed	#N/A	#N/A
1053	Os3626	Os5922	0.999986	2.75e-10		Os1053	MSTRG.10202.2		MSTRG.1383.1	#N/A	#N/A	Similar to Leucine Rich Repeat family protein, expressed.
1054	Os3626	Os20123	0.999986	2.75e-10		Os1054	A2J10_04T0058300.1		A2J10_03T0273100.1	OsWAK112d - OsWAK receptor-like protein kinase, expressed	OsWAK34 - OsWAK receptor-like protein kinase, expressed	Conserved hypothetical protein.
1055	Os1129	Os42216	0.999986	2.76e-10		Os1055	MSTRG.10745.1		MSTRG.221.3	#N/A	#N/A	#N/A
1056	Os1129	Os18715	0.999986	2.77e-10		Os1056	MSTRG.17672.1		MSTRG.3871.6	#N/A	#N/A	#N/A
1057	Os1129	Os41818	0.999986	2.77e-10		Os1057	A2J10_05T0108400.1		A2J10_06T0129500.1	DEFL9 - Defensin and Defensin-like DEFL family, expressed	#N/A	#N/A
1058	Os3626	Os25424	0.999986	2.8e-10		Os1058	A2J10_04T0124800.2		MSTRG.687.6	#N/A	#N/A	#N/A
1059	Os1129	Os42520	0.999986	2.81e-10		Os1059	A2J10_12T0142600.1		A2J10_02T0313200.3	Putative VHS and GAT domain containing protein, expressed	#N/A	#N/A
1060	Os1129	Os43224	0.999986	2.82e-10		Os1060	MSTRG.26017.1		A2J10_01T0203000.1	Conserved hypothetical protein	#N/A	#N/A
1061	Os5130	Os43546	0.999986	2.82e-10		Os1061	MSTRG.16173.2		A2J10_03T0111300.1	DEAD-box ATP-dependent RNA helicase, Putative, expressed	DEAD-box ATP-dependent RNA helicase, Putative, expressed	DEAD-like helicase, N-terminal domain containing protein.
1062	Os5130	Os43143	0.999986	2.82e-10		Os1062	A2J10_12T0039900.1		A2J10_10T0185100.3	casein kinase II subunit beta-4, Putative, expressed	#N/A	#N/A
1063	Os3626	Os42871	0.999986	2.83e-10		Os1063	A2J10_04T0175700.1		MSTRG.2888.2	#N/A	#N/A	#N/A
1064	Os1129	Os17462	0.999986	2.83e-10		Os1064	A2J10_11T0134800.1		A2J10_02T0260300.1	alcohol oxidase, Putative, expressed	#N/A	#N/A
1065	Os5130	Os19313	0.999986	2.83e-10		Os1065	A2J10_09T0212600.1		A2J10_06T0032500.1	RING-H2 finger protein, Putative, expressed	#N/A	#N/A
1066	Os5130	Os43859	0.999986	2.83e-10		Os1066	A2J10_01T0064900.1		A2J10_03T0299800.1	SWI/SNF-related matrix-associated actin-dependent regulator of chromatin subfamily C member, Putative,expressed	#N/A	#N/A
1067	Os5130	Os25217	0.999986	2.83e-10		Os1067	MSTRG.16847.1		MSTRG.14830.1	#N/A	OsFBDUF19 - F-box and DUF domain containing protein, expressed	Similar to F-box domain containing protein, expressed.
1068	Os1129	Os21786	0.999986	2.84e-10		Os1068	MSTRG.238.1		MSTRG.20287.4	#N/A	#N/A	#N/A
1069	Os5130	Os43775	0.999986	2.84e-10		Os1069	MSTRG.8268.1		MSTRG.25772.4	#N/A	#N/A	#N/A
1070	Os3626	Os42856	0.999986	2.85e-10		Os1070	MSTRG.4363.1		MSTRG.8895.3	#N/A	#N/A	Hypothetical protein.
1071	Os1129	Os31349	0.999986	2.85e-10		Os1071	MSTRG.5249.1		MSTRG.8509.1	#N/A	catalase domain containing protein, expressed	Catalase A, Environmental stress response, Drought stress tolerance
1072	Os5130	Os39974	0.999986	2.86e-10		Os1072	A2J10_11T0127700.1		MSTRG.25380.3	#N/A	#N/A	#N/A
1073	Os1129	Os19313	0.999986	2.87e-10		Os1073	A2J10_03T0049500.1		MSTRG.5822.3	#N/A	disease resistance protein RPM1, Putative, expressed	Similar to NBS-LRR protein (Fragment).
1074	Os3626	Os39748	0.999986	2.87e-10		Os1074	A2J10_03T0386300.1		MSTRG.11855.1	#N/A	#N/A	#N/A
1075	Os1129	Os44089	0.999986	2.87e-10		Os1075	A2J10_01T0304200.1		A2J10_12T0119400.1	Conserved hypothetical protein	#N/A	#N/A
1076	Os3626	Os34756	0.999986	2.87e-10		Os1076	MSTRG.23907.4		MSTRG.25296.5	#N/A	#N/A	#N/A
1077	Os3626	Os37985	0.999986	2.88e-10		Os1077	A2J10_03T0042800.4		MSTRG.15965.2	#N/A	#N/A	#N/A
1078	Os1129	Os40544	0.999986	2.88e-10		Os1078	MSTRG.16454.1		MSTRG.20357.1	#N/A	#N/A	#N/A
1079	Os1129	Os35954	0.999986	2.89e-10		Os1079	A2J10_08T0153400.3		A2J10_01T0047900.1	Putative expressed protein	expressed protein	Conserved hypothetical protein.
1080	Os1129	Os26002	0.999986	2.9e-10		Os1080	MSTRG.2488.1		MSTRG.26125.1	#N/A	#N/A	#N/A
1081	Os1129	Os28232	0.999986	2.9e-10		Os1081	A2J10_03T0095700.1		MSTRG.14333.2	#N/A	#N/A	#N/A
1082	Os1129	Os42010	0.999986	2.9e-10		Os1082	MSTRG.19858.1		MSTRG.14905.3	#N/A	#N/A	#N/A
1083	Os1129	Os43033	0.999986	2.91e-10		Os1083	A2J10_02T0135000.1		A2J10_05T0215100.1	radical SAM enzyme, Putative, expressed	tRNA methyltran, Putative, expressed	Putative rRNA methylase family protein.
1084	Os5130	Os43062	0.999986	2.91e-10		Os1084	A2J10_03T0331300.1		A2J10_10T0178700.1	glycosyl transferase 8 domain containing protein, Putative, expressed	glycosyl transferase 8 domain containing protein, Putative, expressed	Glycogenin glucosyltransferase, Submergence-related gene
1085	Os1129	Os42758	0.999986	2.92e-10		Os1085	A2J10_04T0308300.1		MSTRG.17667.4	#N/A	#N/A	#N/A
1086	Os5130	Os43589	0.999986	2.93e-10		Os1086	A2J10_04T0216000.1		A2J10_03T0092300.1	Conserved hypothetical protein	#N/A	#N/A
1087	Os5130	Os25744	0.999986	2.93e-10		Os1087	A2J10_04T0037800.1		A2J10_06T0206800.1	Putative expressed protein	#N/A	#N/A
1088	Os1129	Os33331	0.999986	2.94e-10		Os1088	A2J10_09T0167000.1		A2J10_08T0013300.1	fructose-bisphospate aldolase isozyme, Putative, expressed	fructose-bisphospate aldolase isozyme, Putative, expressed	Similar to Fructose-bisphosphate aldolase, cytoplasmic isozyme (EC 4.1.2.13).
1089	Os3626	Os30505	0.999986	2.94e-10		Os1089	A2J10_08T0228100.1		A2J10_04T0289400.1	harpin-induced protein 1 domain containing protein, expressed	harpin-induced protein 1 domain containing protein, expressed	Harpin-induced 1 domain containing protein.
1090	Os5130	Os35132	0.999986	2.96e-10		Os1090	A2J10_02T0163700.1		A2J10_02T0062700.1	myb-like DNA-binding domain containing protein, Putative, expressed	myb-like DNA-binding domain containing protein, Putative, expressed	Similar to Myb-related protein B (B-Myb) (Myb-related protein 1) (XMYB1).
1091	Os1129	Os32073	0.999986	2.97e-10		Os1091	A2J10_01T0103100.1		A2J10_12T0131800.4	guanylyl cyclase, Putative, expressed	#N/A	#N/A
1092	Os3626	Os22333	0.999986	2.97e-10		Os1092	MSTRG.13190.2		A2J10_03T0133800.1	leucine-rich repeat family protein, Putative, expressed	leucine-rich repeat family protein, Putative, expressed	Similar to predicted protein.
1093	Os3626	Os38697	0.999986	2.98e-10		Os1093	A2J10_05T0193700.1		A2J10_01T0133700.2	Putative OsFBL16 - F-box domain and LRR containing protein, expressed	#N/A	#N/A
1094	Os3626	Os22052	0.999986	2.99e-10		Os1094	A2J10_12T0094200.1		MSTRG.17429.3	#N/A	#N/A	#N/A
1095	Os1129	Os43846	0.999986	2.99e-10		Os1095	A2J10_03T0318100.1		A2J10_03T0149500.1	40S ribosomal protein S21, Putative, expressed	#N/A	#N/A
1096	Os5130	Os33331	0.999986	3e-10		Os1096	MSTRG.13041.1		MSTRG.23762.1	#N/A	Conserved hypothetical protein	#N/A
1097	Os1129	Os13031	0.999986	3.01e-10		Os1097	A2J10_06T0280700.3		MSTRG.26473.2	#N/A	#N/A	#N/A
1098	Os5130	Os43078	0.999986	3.01e-10		Os1098	A2J10_07T0197300.1		A2J10_09T0196600.1	possible lysine decarboxylase domain containing protein, expressed	possible lysine decarboxylase domain containing protein, expressed	Lysine decarboxylase-like protein, Response to abiotic stresses
1099	Os5130	Os31948	0.999986	3.02e-10		Os1099	A2J10_05T0249400.3		MSTRG.4480.4	#N/A	#N/A	#N/A
1100	Os3626	Os35488	0.999986	3.03e-10		Os1100	MSTRG.19680.2		A2J10_04T0162300.1	RALFL22 - Rapid ALkalinization Factor RALF family protein precursor, expressed	RALFL22 - Rapid ALkalinization Factor RALF family protein precursor, expressed	Conserved hypothetical protein.
1101	Os3626	Os40520	0.999986	3.04e-10		Os1101	A2J10_05T0005500.1		MSTRG.1071.1	#N/A	Putative helix-loop-helix DNA-binding domain containing protein, expressed	Phytochrome-interacting factor-like protein, Basic helix-loop-helix factor, Repression of seedling growth in the dark
1102	Os3626	Os38109	0.999986	3.04e-10		Os1102	A2J10_04T0202100.1		MSTRG.12594.1	#N/A	protein phosphatase 2C, Putative, expressed	Hypothetical conserved gene.
1103	Os3626	Os18208	0.999986	3.05e-10		Os1103	MSTRG.21425.2		A2J10_02T0202300.1	Conserved hypothetical protein	#N/A	#N/A
1104	Os3626	Os28853	0.999986	3.05e-10		Os1104	MSTRG.21802.2		A2J10_10T0082500.1	photosystem II reaction center protein H, Putative, expressed	#N/A	#N/A
1105	Os3626	Os37575	0.999986	3.06e-10		Os1105	MSTRG.26281.1		MSTRG.21490.1	#N/A	Conserved hypothetical protein	Conserved hypothetical protein.
1106	Os17880	Os32262	0.999986	3.09e-10		Os1106	MSTRG.20746.1		A2J10_02T0279100.4	protein kinase domain containing protein, expressed	#N/A	#N/A
1107	Os1129	Os43786	0.999986	3.09e-10		Os1107	A2J10_03T0078600.1		MSTRG.14757.6	#N/A	#N/A	#N/A
1108	Os5130	Os25644	0.999986	3.11e-10		Os1108	A2J10_03T0097200.1		A2J10_01T0303900.1	transmembrane protein 16K, Putative, expressed	#N/A	#N/A
1109	Os1129	Os29154	0.999986	3.12e-10		Os1109	A2J10_06T0303700.1		MSTRG.2060.3	#N/A	#N/A	#N/A
1110	Os5130	Os43838	0.999986	3.12e-10		Os1110	A2J10_09T0038300.1		A2J10_02T0230900.1	uncharacterized Cys-rich domain containing protein, Putative, expressed	#N/A	#N/A
1111	Os5130	Os37264	0.999986	3.12e-10		Os1111	MSTRG.8249.1		A2J10_03T0037600.1	inorganic phosphate transporter, Putative, expressed	#N/A	#N/A
1112	Os1129	Os20872	0.999986	3.14e-10		Os1112	MSTRG.13763.1		A2J10_12T0078400.1	ribulose bisphosphate carboxylase small chain, chloroplast precursor, Putative, expressed	ribulose bisphosphate carboxylase small chain, chloroplast precursor, Putative, expressed	#N/A
1113	Os3626	Os39754	0.999986	3.14e-10		Os1113	A2J10_11T0155100.1		MSTRG.22857.4	#N/A	#N/A	#N/A
1114	Os3626	Os25492	0.999986	3.15e-10		Os1114	A2J10_04T0257400.1		MSTRG.6954.1	#N/A	protein kinase domain containing protein, expressed	Similar to Protein kinase domain containing protein, expressed.
1115	Os5130	Os28344	0.999985	3.18e-10		Os1115	A2J10_09T0150100.1		A2J10_10T0067000.3	resistance protein, Putative, expressed	NB-ARC domain containing protein, expressed	#N/A
1116	Os3626	Os42722	0.999985	3.19e-10		Os1116	MSTRG.20711.2		A2J10_06T0154800.1	expressed protein	#N/A	#N/A
1117	Os1129	Os42977	0.999985	3.2e-10		Os1117	A2J10_02T0134900.1		MSTRG.6063.1	#N/A	#N/A	#N/A
1118	Os5130	Os32200	0.999985	3.22e-10		Os1118	A2J10_10T0189600.1		A2J10_12T0189600.1	expressed protein	expressed protein	Conserved hypothetical protein.
1119	Os4820	Os33195	0.999985	3.23e-10		Os1119	A2J10_03T0362600.1		A2J10_12T0141600.1	pathogenesis-related Bet v I family protein, Putative, expressed	pathogenesis-related Bet v I family protein, Putative, expressed	Root-specific pathogenesis-related (PR) protein, Drought and salt stress response, Defense response
1120	Os1129	Os43868	0.999985	3.24e-10		Os1120	MSTRG.16639.4		A2J10_03T0342700.1	syntaxin, Putative, expressed	#N/A	#N/A
1121	Os5130	Os38676	0.999985	3.24e-10		Os1121	MSTRG.10627.1		MSTRG.8309.1	#N/A	mov34/MPN/PAD-1 family protein, expressed	Similar to Mov34/MPN/PAD-1 family protein, expressed.
1122	Os5130	Os14935	0.999985	3.25e-10		Os1122	A2J10_11T0000500.1		MSTRG.8260.1	#N/A	SET domain containing protein, expressed	Hypothetical conserved gene.
1123	Os3626	Os25084	0.999985	3.25e-10		Os1123	MSTRG.11902.1		MSTRG.14399.8	#N/A	#N/A	#N/A
1124	Os5130	Os42891	0.999985	3.26e-10		Os1124	A2J10_04T0183500.1		A2J10_09T0121200.3	auxin-induced protein 5NG4, Putative, expressed	#N/A	#N/A
1125	Os1129	Os42905	0.999985	3.27e-10		Os1125	A2J10_07T0206700.1		MSTRG.253.5	#N/A	#N/A	#N/A
1126	Os5130	Os21892	0.999985	3.27e-10		Os1126	MSTRG.19722.1		A2J10_06T0207900.1	Conserved hypothetical protein	#N/A	#N/A
1127	Os1129	Os32317	0.999985	3.27e-10		Os1127	A2J10_04T0107300.1		A2J10_01T0433100.2	hydrolase, alpha/beta fold family protein, Putative, expressed	#N/A	#N/A
1128	Os3626	Os25427	0.999985	3.28e-10		Os1128	A2J10_06T0193900.1		A2J10_06T0201700.2	expressed protein	#N/A	#N/A
1129	Os1129	Os37843	0.999985	3.29e-10		Os1129	A2J10_10T0083300.1		A2J10_12T0019600.1	expressed protein	expressed protein	Conserved hypothetical protein.
1130	Os1129	Os17602	0.999985	3.29e-10		Os1130	A2J10_04T0097300.1		MSTRG.11853.1	#N/A	nascent polypeptide-associated complex subunit alpha, Putative, expressed	Similar to Nascent polypeptide-associated complex alpha subunit-like protein 3 (NAC-alpha-like protein 3) (Alpha-NAC-like protein 3).
1131	Os3626	Os43817	0.999985	3.3e-10		Os1131	MSTRG.4538.1		A2J10_05T0027100.1	1-aminocyclopropane-1-carboxylate oxidase, Putative, expressed	#N/A	#N/A
1132	Os3626	Os42521	0.999985	3.31e-10		Os1132	A2J10_08T0010000.1		MSTRG.23765.1	#N/A	#N/A	#N/A
1133	Os1129	Os40969	0.999985	3.31e-10		Os1133	A2J10_10T0039700.1		A2J10_11T0151000.2	9-cis-epoxycarotenoid dioxygenase 1, chloroplast precursor, Putative, expressed	#N/A	#N/A
1134	Os3626	Os43033	0.999985	3.31e-10		Os1134	MSTRG.7730.9		MSTRG.13293.5	#N/A	#N/A	#N/A
1135	Os5130	Os13876	0.999985	3.33e-10		Os1135	MSTRG.23040.3		MSTRG.21354.2	#N/A	#N/A	#N/A
1136	Os5130	Os28571	0.999985	3.34e-10		Os1136	MSTRG.8276.2		A2J10_04T0216700.3	purine permease, Putative, expressed	purine permease, Putative, expressed	Domain of unknown function DUF250 domain containing protein.
1137	Os3626	Os25657	0.999985	3.35e-10		Os1137	MSTRG.22268.1		MSTRG.20770.1	#N/A	#N/A	#N/A
1138	Os3626	Os40021	0.999985	3.35e-10		Os1138	A2J10_06T0241000.1		A2J10_06T0147500.1	poor homologous synapsis 1 protein, Putative, expressed	poor homologous synapsis 1 protein, Putative, expressed	Hypothetical conserved gene.
1139	Os1129	Os41948	0.999985	3.36e-10		Os1139	MSTRG.26709.2		A2J10_03T0221700.1	dof zinc finger domain containing protein, Putative, expressed	dof zinc finger domain containing protein, Putative, expressed	Conserved hypothetical protein.
1140	Os1129	Os25340	0.999985	3.37e-10		Os1140	A2J10_09T0167800.1		MSTRG.4152.4	#N/A	#N/A	#N/A
1141	Os14322	Os33685	0.999985	3.38e-10		Os1141	A2J10_07T0195300.1		A2J10_09T0161000.1	AN1-like zinc finger domain containing protein, expressed	AN1-like zinc finger domain containing protein, expressed	A20/AN1 zinc-finger protein, Response to multiple biotic stresses, Regulation of abiotic stress responses
1142	Os1129	Os28096	0.999985	3.38e-10		Os1142	MSTRG.2123.3		MSTRG.16737.23	#N/A	#N/A	#N/A
1143	Os3626	Os43807	0.999985	3.39e-10		Os1143	A2J10_08T0009400.1		MSTRG.4664.1	#N/A	white-brown complex homolog protein, Putative, expressed	ABC transporter, White-brown complex homolog protein, Silicon-promoted formation of Casparian bands in the exodermis
1144	Os3626	Os38626	0.999985	3.4e-10		Os1144	A2J10_01T0072100.1		MSTRG.11317.1	#N/A	#N/A	#N/A
1145	Os1129	Os44297	0.999985	3.4e-10		Os1145	A2J10_06T0249600.1		A2J10_05T0266800.3	expressed protein	expressed protein	Hypothetical protein.
1146	Os4820	Os34750	0.999985	3.41e-10		Os1146	MSTRG.4940.4		A2J10_07T0227200.1	PHD finger protein, Putative, expressed	PHD finger protein, Putative, expressed	Similar to Alfin-1.
1147	Os28327	Os43731	0.999985	3.41e-10		Os1147	A2J10_01T0497800.1		A2J10_04T0083100.1	OsWAK47 - OsWAK receptor-like protein kinase, expressed	#N/A	#N/A
1148	Os1129	Os23872	0.999985	3.42e-10		Os1148	A2J10_10T0137200.1		A2J10_06T0055800.3	Putative OsFBX187 - F-box domain containing protein, expressed	#N/A	#N/A
1149	Os3626	Os43654	0.999985	3.43e-10		Os1149	MSTRG.21359.1		A2J10_07T0008300.1	pentatricopeptide, Putative, expressed	pentatricopeptide, Putative, expressed	Pentatricopeptide repeat domain containing protein.
1150	Os3626	Os33742	0.999985	3.44e-10		Os1150	A2J10_03T0010500.1		A2J10_03T0232000.1	Conserved hypothetical protein	#N/A	#N/A
1151	Os3626	Os38789	0.999985	3.44e-10		Os1151	A2J10_01T0153800.1		A2J10_03T0296900.1	actin, Putative, expressed	#N/A	#N/A
1152	Os1129	Os27921	0.999985	3.49e-10		Os1152	A2J10_10T0184800.1		MSTRG.16169.1	#N/A	#N/A	#N/A
1153	Os5130	Os43758	0.999985	3.5e-10		Os1153	A2J10_06T0024900.1		MSTRG.18227.2	#N/A	#N/A	#N/A
1154	Os25570	Os28807	0.999985	3.51e-10		Os1154	MSTRG.16627.2		A2J10_04T0062500.1	Conserved hypothetical protein	#N/A	#N/A
1155	Os3626	Os21842	0.999985	3.53e-10		Os1155	A2J10_04T0167200.1		MSTRG.3467.1	#N/A	#N/A	#N/A
1156	Os1129	Os42759	0.999985	3.53e-10		Os1156	MSTRG.10930.1		MSTRG.367.5	#N/A	#N/A	#N/A
1157	Os3626	Os25139	0.999985	3.53e-10		Os1157	A2J10_11T0010900.1		A2J10_11T0229600.1	OsAPx1 - Cytosolic Ascorbate Peroxidase encoding gene 1-8, expressed	OsAPx1 - Cytosolic Ascorbate Peroxidase encoding gene 1-8, expressed	Cytosolic ascorbate peroxidase, Salt tolerance
1158	Os5130	Os17851	0.999985	3.54e-10		Os1158	A2J10_03T0336300.1		MSTRG.15858.2	#N/A	#N/A	#N/A
1159	Os1129	Os5585	0.999985	3.54e-10		Os1159	MSTRG.221.2		A2J10_07T0186900.1	transporter family protein, Putative, expressed	#N/A	#N/A
1160	Os3626	Os35469	0.999985	3.54e-10		Os1160	A2J10_03T0329800.1		MSTRG.16457.2	#N/A	Putative OsFBX117 - F-box domain containing protein, expressed	Conserved hypothetical protein.
1161	Os3626	Os18220	0.999985	3.55e-10		Os1161	MSTRG.19329.4		A2J10_06T0243500.1	expressed protein	#N/A	#N/A
1162	Os1129	Os38271	0.999985	3.55e-10		Os1162	MSTRG.16170.2		MSTRG.13976.6	#N/A	#N/A	#N/A
1163	Os5130	Os42816	0.999985	3.55e-10		Os1163	MSTRG.24743.3		A2J10_02T0032900.1	Putative expressed protein	#N/A	#N/A
1164	Os3626	Os42472	0.999985	3.56e-10		Os1164	MSTRG.10679.1		A2J10_12T0168700.3	methylcrotonoyl-CoA carboxylase subunit alpha, mitochondrial precursor, Putative, expressed	#N/A	#N/A
1165	Os5130	Os20884	0.999985	3.57e-10		Os1165	A2J10_08T0203300.2		MSTRG.3260.1	#N/A	#N/A	#N/A
1166	Os5130	Os37987	0.999985	3.58e-10		Os1166	A2J10_12T0066600.1		A2J10_07T0181800.1	OsSub62 - Putative Subtilisin homologue, expressed	#N/A	#N/A
1167	Os1129	Os25882	0.999985	3.58e-10		Os1167	MSTRG.25171.4		A2J10_04T0231000.1	plant-specific domain TIGR01627 family protein, expressed	plant-specific domain TIGR01627 family protein, expressed	Protein of unknown function DUF579, plant family protein.
1168	Os5130	Os8153	0.999985	3.58e-10		Os1168	MSTRG.19944.2		A2J10_08T0152900.1	expressed protein	#N/A	#N/A
1169	Os5130	Os42759	0.999985	3.59e-10		Os1169	A2J10_10T0066100.1		MSTRG.13958.4	#N/A	#N/A	#N/A
1170	Os1129	Os42816	0.999985	3.59e-10		Os1170	MSTRG.12857.1		MSTRG.15276.3	#N/A	#N/A	#N/A
1171	Os28541	Os38997	0.999985	3.6e-10		Os1171	MSTRG.9252.1		A2J10_03T0213800.1	DTW domain containing protein, Putative, expressed	DTW domain containing protein, Putative, expressed	DTW domain containing protein.
1172	Os3626	Os42821	0.999984	3.6e-10		Os1172	A2J10_04T0146100.1		MSTRG.25033.6	#N/A	#N/A	#N/A
1173	Os3626	Os43802	0.999984	3.62e-10		Os1173	MSTRG.17484.4		MSTRG.20398.1	#N/A	SFT2, Putative, expressed	SFT2-like family protein.
1174	Os1129	Os17276	0.999984	3.63e-10		Os1174	MSTRG.8776.2		A2J10_11T0062100.1	expressed protein	#N/A	#N/A
1175	Os3626	Os34713	0.999984	3.64e-10		Os1175	A2J10_03T0202200.1		A2J10_12T0166700.1	kinase, pfkB family, Putative, expressed	kinase, pfkB family, Putative, expressed	Similar to Pyridoxal kinase.
1176	Os3626	Os39915	0.999984	3.64e-10		Os1176	A2J10_03T0185100.1		A2J10_04T0311200.1	sodium/calcium exchanger protein, Putative, expressed	sodium/calcium exchanger protein, Putative, expressed	Similar to Cation/proton exchanger 1a.
1177	Os5130	Os30940	0.999984	3.65e-10		Os1177	MSTRG.3630.1		MSTRG.13218.1	#N/A	#N/A	Similar to Serine carboxypeptidase family protein, expressed.
1178	Os5130	Os42513	0.999984	3.66e-10		Os1178	A2J10_05T0271200.2		A2J10_02T0172800.2	endonuclease/exonuclease/phosphatase family domain containing protein, expressed	#N/A	#N/A
1179	Os3626	Os43781	0.999984	3.66e-10		Os1179	MSTRG.12290.1		MSTRG.8797.2	#N/A	#N/A	#N/A
1180	Os1129	Os43758	0.999984	3.66e-10		Os1180	MSTRG.543.5		MSTRG.725.2	#N/A	#N/A	#N/A
1181	Os5130	Os28754	0.999984	3.67e-10		Os1181	A2J10_03T0028000.1		MSTRG.402.6	#N/A	#N/A	#N/A
1182	Os1129	Os11651	0.999984	3.68e-10		Os1182	MSTRG.3968.3		MSTRG.14697.4	#N/A	ZOS3-23 - C2H2 zinc finger protein, expressed	Zinc finger, U1-type domain containing protein.
1183	Os23198	Os33896	0.999984	3.68e-10		Os1183	A2J10_02T0254800.1		MSTRG.22700.3	#N/A	#N/A	#N/A
1184	Os1129	Os43383	0.999984	3.68e-10		Os1184	MSTRG.13900.3		A2J10_03T0395900.1	DANA2, Putative, expressed	#N/A	#N/A
1185	Os5130	Os25340	0.999984	3.69e-10		Os1185	A2J10_09T0121000.1		A2J10_01T0286900.1	S-locus-like receptor protein kinase, Putative, expressed	#N/A	#N/A
1186	Os1129	Os16855	0.999984	3.7e-10		Os1186	MSTRG.15900.1		A2J10_02T0008500.2	Alg9-like mannosyltransferase protein, Putative, expressed	#N/A	#N/A
1187	Os5130	Os31759	0.999984	3.72e-10		Os1187	A2J10_01T0074100.1		MSTRG.1404.8	#N/A	#N/A	#N/A
1188	Os1129	Os20814	0.999984	3.72e-10		Os1188	A2J10_07T0255800.1		MSTRG.18159.1	#N/A	#N/A	#N/A
1189	Os25531	Os42661	0.999984	3.73e-10		Os1189	A2J10_02T0093300.1		MSTRG.15726.1	#N/A	Os4bglu13 - beta-glucosidase homologue, similar to Os4Bglu12 exoglucanase/b-glucosidase, expressed	Similar to Isoform 2 of Beta-glucosidase 12.
1190	Os3626	Os40235	0.999984	3.74e-10		Os1190	A2J10_12T0162500.2		A2J10_02T0168000.1	vegetative storage protein, Putative, expressed	vegetative storage protein, Putative, expressed	Pentatricopeptide repeat domain containing protein.
1191	Os3626	Os40517	0.999984	3.74e-10		Os1191	A2J10_03T0108800.1		MSTRG.25655.2	#N/A	#N/A	#N/A
1192	Os1129	Os13876	0.999984	3.75e-10		Os1192	MSTRG.2138.1		A2J10_04T0295500.1	no apical meristem protein, Putative, expressed	#N/A	#N/A
1193	Os1129	Os32304	0.999984	3.76e-10		Os1193	MSTRG.26278.1		MSTRG.6543.1	#N/A	expressed protein	Exo70 exocyst complex subunit family protein.
1194	Os3626	Os43955	0.999984	3.78e-10		Os1194	MSTRG.15739.1		MSTRG.6916.1	#N/A	oxidoreductase, 2OG-Fe oxygenase family protein, Putative, expressed	2OG-Fe(II) oxygenase domain containing protein.
1195	Os5130	Os43868	0.999984	3.79e-10		Os1195	A2J10_07T0218200.1		A2J10_08T0194100.1	glycerophosphoryl diester phosphodiesterase family protein, Putative, expressed	glycerophosphoryl diester phosphodiesterase family protein, Putative, expressed	PLC-like phosphodiesterase, TIM beta/alpha-barrel domain domain containing protein.
1196	Os4820	Os17221	0.999984	3.81e-10		Os1196	A2J10_01T0329600.1		MSTRG.17427.2	#N/A	#N/A	#N/A
1197	Os1129	Os13129	0.999984	3.82e-10		Os1197	A2J10_06T0293700.3		MSTRG.11740.1	#N/A	expressed protein	Protein of unknown function DUF1677, Oryza sativa domain containing protein.
1198	Os28327	Os40632	0.999984	3.82e-10		Os1198	MSTRG.19803.1		A2J10_03T0284800.2	phosphatase, Putative, expressed	#N/A	#N/A
1199	Os3626	Os37690	0.999984	3.84e-10		Os1199	A2J10_02T0113400.1		A2J10_12T0184500.1	RING-H2 finger protein ATL3F, Putative, expressed	RING-H2 finger protein ATL3F, Putative, expressed	Similar to RING-H2 finger protein ATL1D.
1200	Os1129	Os42811	0.999984	3.85e-10		Os1200	A2J10_06T0149400.1		A2J10_12T0052600.1	expressed protein	#N/A	#N/A
1201	Os5130	Os37992	0.999984	3.85e-10		Os1201	A2J10_12T0153000.1		A2J10_02T0389800.4	UDP-glucuronate 4-epimerase, Putative, expressed	#N/A	#N/A
1202	Os1129	Os43257	0.999984	3.86e-10		Os1202	A2J10_11T0174900.1		A2J10_02T0299900.1	glycosyl hydrolase, Putative, expressed	glycosyl hydrolase, Putative, expressed	Similar to Hevamine A precursor [Includes: Chitinase (EC 3.2.1.14); Lysozyme (EC 3.2.1.17)].
1203	Os1129	Os22275	0.999984	3.87e-10		Os1203	MSTRG.14435.1		MSTRG.24936.2	#N/A	NB-ARC domain containing protein, expressed	Similar to NB-ARC domain containing protein.
1204	Os3626	Os20872	0.999984	3.88e-10		Os1204	A2J10_12T0156400.1		MSTRG.1608.1	#N/A	#N/A	#N/A
1205	Os3626	Os25724	0.999984	3.89e-10		Os1205	A2J10_10T0163500.1		MSTRG.24293.1	#N/A	#N/A	#N/A
1206	Os3626	Os28418	0.999984	3.9e-10		Os1206	MSTRG.16960.1		MSTRG.2078.3	#N/A	#N/A	#N/A
1207	Os5130	Os43786	0.999984	3.9e-10		Os1207	MSTRG.10632.1		MSTRG.8691.2	#N/A	#N/A	#N/A
1208	Os5130	Os27319	0.999984	3.91e-10		Os1208	A2J10_01T0030200.1		MSTRG.6340.2	#N/A	#N/A	#N/A
1209	Os1129	Os42070	0.999984	3.91e-10		Os1209	A2J10_07T0103000.1		MSTRG.14332.2	#N/A	#N/A	#N/A
1210	Os3626	Os28522	0.999984	3.92e-10		Os1210	MSTRG.8857.1		A2J10_06T0262700.1	DUF640 domain containing protein, Putative, expressed	#N/A	#N/A
1211	Os3626	Os25695	0.999984	3.92e-10		Os1211	MSTRG.18839.1		A2J10_10T0123300.1	AP2 domain containing protein, expressed	#N/A	#N/A
1212	Os3626	Os30742	0.999984	3.93e-10		Os1212	MSTRG.9592.1		A2J10_09T0013700.1	expressed protein	expressed protein	Conserved hypothetical protein.
1213	Os1129	Os18774	0.999984	3.93e-10		Os1213	MSTRG.8313.3		A2J10_01T0110400.1	tetratricopeptide-like helical, Putative, expressed	tetratricopeptide-like helical, Putative, expressed	#N/A
1214	Os5130	Os15748	0.999984	3.94e-10		Os1214	MSTRG.5439.1		A2J10_05T0002400.1	50S ribosomal protein L10, chloroplast precursor, Putative, expressed	50S ribosomal protein L10, chloroplast precursor, Putative, expressed	Similar to structural constituent of ribosome.
1215	Os1129	Os18271	0.999984	3.95e-10		Os1215	A2J10_06T0279800.3		MSTRG.19881.8	#N/A	#N/A	#N/A
1216	Os1129	Os26121	0.999984	3.95e-10		Os1216	MSTRG.3382.4		A2J10_04T0125500.1	Conserved hypothetical protein	expressed protein	Conserved hypothetical protein.
1217	Os5130	Os28776	0.999984	3.95e-10		Os1217	A2J10_10T0000300.1		MSTRG.13937.2	#N/A	#N/A	#N/A
1218	Os5130	Os42997	0.999984	3.96e-10		Os1218	MSTRG.23950.1		A2J10_01T0432600.1	cytochrome P450, Putative, expressed	cytochrome P450, Putative, expressed	Hypothetical protein.
1219	Os5130	Os14253	0.999984	3.96e-10		Os1219	MSTRG.2502.2		MSTRG.9781.6	#N/A	#N/A	#N/A
1220	Os5130	Os22352	0.999984	3.97e-10		Os1220	A2J10_11T0236700.1		A2J10_05T0242400.1	LTPL152 - Protease inhibitor/seed storage/LTP family protein precursor, expressed	#N/A	#N/A
1221	Os28327	Os43816	0.999984	3.97e-10		Os1221	A2J10_01T0197800.1		MSTRG.9558.1	#N/A	WD domain, G-beta repeat domain containing protein, expressed	WD40 repeat-like domain containing protein.
1222	Os5130	Os43846	0.999984	3.98e-10		Os1222	MSTRG.21366.1		MSTRG.21926.4	#N/A	expressed protein	#N/A
1223	Os5130	Os32073	0.999984	4e-10		Os1223	A2J10_07T0005600.1		MSTRG.2241.3	#N/A	#N/A	#N/A
1224	Os5130	Os17602	0.999984	4.01e-10		Os1224	MSTRG.19459.1		MSTRG.4870.2	#N/A	#N/A	#N/A
1225	Os5130	Os30505	0.999984	4.02e-10		Os1225	A2J10_01T0466400.1		MSTRG.7578.1	#N/A	copine, Putative, expressed	Similar to Ubiquitin ligase protein mib (EC 6.3.2.-) (Mind bomb protein).
1226	Os5130	Os43114	0.999984	4.02e-10		Os1226	A2J10_07T0209300.1		MSTRG.1239.1	#N/A	transcription initiation factor IID, 18kD subunit family protein, expressed	Similar to Transcription initiation factor IID, 18kD subunit family protein.
1227	Os5130	Os24964	0.999984	4.03e-10		Os1227	MSTRG.22163.2		MSTRG.21741.5	#N/A	#N/A	#N/A
1228	Os25570	Os42885	0.999984	4.03e-10		Os1228	MSTRG.350.1		A2J10_03T0310200.1	expressed protein	expressed protein	Protein of unknown function methylase putative domain containing protein.
1229	Os3626	Os43850	0.999984	4.03e-10		Os1229	A2J10_03T0289900.1		A2J10_09T0071200.1	cysteine-rich receptor-like protein kinase 25 precursor, Putative, expressed	cysteine-rich receptor-like protein kinase 25 precursor, Putative, expressed	Protein kinase, core domain containing protein.
1230	Os5130	Os42758	0.999984	4.04e-10		Os1230	MSTRG.16952.1		A2J10_07T0002100.1	kinesin motor domain containing protein, Putative, expressed	kinesin motor domain containing protein, Putative, expressed	Class-XIV kinesin
1231	Os5130	Os10644	0.999984	4.04e-10		Os1231	MSTRG.23516.1		A2J10_02T0010400.1	expressed protein	#N/A	#N/A
1232	Os1129	Os21116	0.999984	4.06e-10		Os1232	A2J10_02T0233200.1		A2J10_10T0155500.2	CGMC_GSK.9 - CGMC includes CDA, MAPK, GSK3, and CLKC kinases, expressed	#N/A	#N/A
1233	Os5130	Os28232	0.999984	4.06e-10		Os1233	MSTRG.7519.2		MSTRG.20700.1	#N/A	#N/A	#N/A
1234	Os1129	Os42891	0.999984	4.08e-10		Os1234	MSTRG.24920.2		MSTRG.27051.2	#N/A	#N/A	#N/A
1235	Os5130	Os42525	0.999983	4.09e-10		Os1235	A2J10_09T0146500.1		MSTRG.12728.2	#N/A	#N/A	#N/A
1236	Os1129	Os28913	0.999983	4.09e-10		Os1236	A2J10_04T0234000.4		A2J10_07T0279800.1	pentatricopeptide, Putative, expressed	pentatricopeptide, Putative, expressed	Pentatricopeptide repeat domain containing protein.
1237	Os3626	Os25065	0.999983	4.1e-10		Os1237	MSTRG.11994.3		MSTRG.10907.4	#N/A	#N/A	#N/A
1238	Os5130	Os18088	0.999983	4.11e-10		Os1238	MSTRG.17382.2		A2J10_05T0115300.1	ranBP1 domain containing protein, expressed	#N/A	#N/A
1239	Os28327	Os43121	0.999983	4.12e-10		Os1239	MSTRG.8830.2		A2J10_04T0240100.2	expressed protein	#N/A	#N/A
1240	Os3626	Os43836	0.999983	4.13e-10		Os1240	MSTRG.25662.1		MSTRG.11108.1	#N/A	glycosyl hydrolase family 47 domain contain protein, expressed	Glycoside hydrolase, family 47 protein.
1241	Os3626	Os25152	0.999983	4.13e-10		Os1241	A2J10_05T0011000.1		A2J10_02T0173200.1	Putative expressed protein	expressed protein	Conserved hypothetical protein.
1242	Os3626	Os43766	0.999983	4.15e-10		Os1242	A2J10_06T0055400.1		A2J10_12T0184300.1	thaumatin, Putative, expressed	thaumatin, Putative, expressed	Similar to Thaumatin-like pathogenesis-related protein 3 precursor.
1243	Os1129	Os25139	0.999983	4.18e-10		Os1243	MSTRG.26220.1		MSTRG.11007.1	#N/A	RING finger protein, Putative, expressed	#N/A
1244	Os5130	Os17462	0.999983	4.21e-10		Os1244	A2J10_03T0121100.1		MSTRG.3919.1	#N/A	expressed protein	Conserved hypothetical protein.
1245	Os5130	Os39187	0.999983	4.21e-10		Os1245	A2J10_06T0245100.1		A2J10_04T0119900.1	amino acid permease family protein, Putative, expressed	amino acid permease family protein, Putative, expressed	Amino acid/polyamine transporter I family protein.
1246	Os1129	Os11121	0.999983	4.26e-10		Os1246	A2J10_03T0066400.1		MSTRG.17698.1	#N/A	1-aminocyclopropane-1-carboxylate oxidase, Putative, expressed	Similar to 1-aminocyclopropane-1-carboxylate oxidase.
1247	Os1129	Os28065	0.999983	4.27e-10		Os1247	A2J10_03T0016700.1		A2J10_01T0483800.1	Conserved hypothetical protein	#N/A	Conserved hypothetical protein.
1248	Os1129	Os24979	0.999983	4.27e-10		Os1248	A2J10_03T0190100.2		A2J10_01T0179500.1	expressed protein	expressed protein	Protein of unknown function DUF679 family protein.
1249	Os1129	Os43380	0.999983	4.28e-10		Os1249	A2J10_11T0146000.1		MSTRG.9531.1	#N/A	ATP11 protein, expressed	Similar to ATP11 protein.
1250	Os1989	Os22640	0.999983	4.29e-10		Os1250	A2J10_02T0411300.1		A2J10_02T0327900.1	fatty acid desaturase, Putative, expressed	#N/A	Similar to Delta-12 fatty acid desaturase.
1251	Os3626	Os24975	0.999983	4.3e-10		Os1251	A2J10_01T0025200.1		MSTRG.2965.1	#N/A	transcription factor, Putative, expressed	Similar to BZIP transcription factor.
1252	Os5130	Os15688	0.999983	4.31e-10		Os1252	A2J10_06T0075500.1		A2J10_11T0043200.1	plant neutral invertase domain containing protein, expressed	plant neutral invertase domain containing protein, expressed	Plant neutral invertase family protein.
1253	Os3626	Os6478	0.999983	4.31e-10		Os1253	MSTRG.6002.1		A2J10_11T0001300.3	RNA recognition motif containing protein, Putative, expressed	#N/A	#N/A
1254	Os5130	Os43961	0.999983	4.31e-10		Os1254	A2J10_02T0199400.1		MSTRG.24129.6	#N/A	#N/A	#N/A
1255	Os3626	Os39239	0.999983	4.31e-10		Os1255	A2J10_06T0093200.1		A2J10_03T0160000.2	expressed protein	#N/A	#N/A
1256	Os3626	Os43859	0.999983	4.31e-10		Os1256	MSTRG.18659.3		A2J10_02T0198400.1	Conserved hypothetical protein	#N/A	#N/A
1257	Os3626	Os25217	0.999983	4.31e-10		Os1257	A2J10_04T0224000.1		MSTRG.9834.4	#N/A	#N/A	#N/A
1258	Os1129	Os41631	0.999983	4.32e-10		Os1258	MSTRG.18303.2		MSTRG.23407.2	#N/A	aspartic proteinase nepenthesin precursor, Putative, expressed	Aspartic proteinase, Promotion of programmed cell death
1259	Os3626	Os43775	0.999983	4.32e-10		Os1259	A2J10_03T0117000.1		MSTRG.7108.2	#N/A	#N/A	#N/A
1260	Os5130	Os24936	0.999983	4.34e-10		Os1260	MSTRG.1814.1		A2J10_02T0055500.1	AMP-binding domain containing protein, expressed	#N/A	#N/A
1261	Os5130	Os42520	0.999983	4.35e-10		Os1261	A2J10_04T0324100.4		A2J10_02T0027000.1	DUF1645 domain containing protein, Putative, expressed	DUF1645 domain containing protein, Putative, expressed	DUF1645 family protein, Regulation of stress-tolerance and grain length
1262	Os5130	Os15007	0.999983	4.35e-10		Os1262	A2J10_06T0275200.1		A2J10_08T0130500.1	ribonucleases P/MRP protein subunit POP1 containing protein, expressed	#N/A	#N/A
1263	Os5130	Os40219	0.999983	4.35e-10		Os1263	MSTRG.19085.1		MSTRG.26131.5	#N/A	#N/A	#N/A
1264	Os1129	Os37264	0.999983	4.36e-10		Os1264	A2J10_07T0023700.1		A2J10_02T0389800.5	UDP-glucuronate 4-epimerase, Putative, expressed	#N/A	#N/A
1265	Os3626	Os18005	0.999983	4.36e-10		Os1265	MSTRG.16819.9		MSTRG.12672.2	#N/A	#N/A	#N/A
1266	Os1129	Os43838	0.999983	4.36e-10		Os1266	A2J10_01T0346700.2		A2J10_02T0207300.2	U-box domain containing protein, expressed	U-box domain containing protein, expressed	Similar to photoperiod responsive protein.
1267	Os3626	Os35800	0.999983	4.37e-10		Os1267	MSTRG.1402.1		MSTRG.9935.4	#N/A	#N/A	#N/A
1268	Os1129	Os25644	0.999983	4.38e-10		Os1268	MSTRG.19175.1		A2J10_04T0110700.1	ABC transmembrane transporter domain containing protein, expressed	Putative ABC transmembrane transporter domain containing protein, expressed	Similar to OSIGBa0134P10.6 protein.
1269	Os3626	Os23294	0.999983	4.38e-10		Os1269	MSTRG.19931.1		A2J10_05T0101700.3	Conserved hypothetical protein	#N/A	#N/A
1270	Os5130	Os42528	0.999983	4.4e-10		Os1270	MSTRG.6290.1		A2J10_05T0048400.1	WRKY67, expressed	#N/A	#N/A
1271	Os5130	Os37589	0.999983	4.4e-10		Os1271	A2J10_10T0143900.1		A2J10_11T0160300.1	plastid-specific 50S ribosomal protein 6, chloroplast precursor, Putative, expressed	#N/A	#N/A
1272	Os5130	Os42852	0.999983	4.4e-10		Os1272	A2J10_10T0151000.1		A2J10_09T0163900.2	auxin efflux carrier component, Putative, expressed	#N/A	#N/A
1273	Os3626	Os13619	0.999983	4.43e-10		Os1273	MSTRG.3863.1		MSTRG.14873.1	#N/A	#N/A	#N/A
1274	Os5130	Os42999	0.999983	4.43e-10		Os1274	A2J10_04T0212200.1		MSTRG.23451.6	#N/A	#N/A	#N/A
1275	Os3626	Os7471	0.999983	4.43e-10		Os1275	A2J10_01T0285500.1		A2J10_02T0389400.3	ankyrin repeat-rich protein, Putative, expressed	#N/A	#N/A
1276	Os3626	Os43062	0.999983	4.47e-10		Os1276	MSTRG.10904.1		A2J10_11T0137700.1	nodulin MtN3 family protein, Putative, expressed	nodulin MtN3 family protein, Putative, expressed	Sugar transporter, TAL effector-mediated susceptibility to bacterial pathogen
1277	Os3626	Os30871	0.999983	4.49e-10		Os1277	MSTRG.17689.2		MSTRG.9260.1	#N/A	WRKY115, expressed	#N/A
1278	Os3626	Os43589	0.999983	4.5e-10		Os1278	MSTRG.3134.1		MSTRG.16737.18	#N/A	SHR5-receptor-like kinase, Putative, expressed	#N/A
1279	Os1129	Os39187	0.999983	4.5e-10		Os1279	A2J10_10T0154600.1		MSTRG.5227.4	#N/A	flavonol synthase/flavanone 3-hydroxylase, Putative, expressed	Similar to Oxidoreductase, 2OG-Fe oxygenase family protein, expressed.
1280	Os5130	Os38061	0.999983	4.51e-10		Os1280	MSTRG.10684.1		A2J10_02T0062800.1	dehydrogenase, Putative, expressed	#N/A	#N/A
1281	Os3626	Os32718	0.999983	4.51e-10		Os1281	A2J10_01T0223200.4		MSTRG.23767.1	#N/A	#N/A	#N/A
1282	Os3626	Os25744	0.999983	4.51e-10		Os1282	MSTRG.14188.1		A2J10_04T0251600.2	amidase family protein, Putative, expressed	#N/A	#N/A
1283	Os3626	Os42519	0.999983	4.51e-10		Os1283	A2J10_09T0141600.1		A2J10_02T0287800.5	UDP-glucose glycoprotein glucosyltransferase 1 precursor, Putative, expressed	#N/A	#N/A
1284	Os3626	Os27570	0.999983	4.55e-10		Os1284	MSTRG.7176.5		MSTRG.18741.1	#N/A	Hypothetical protein	#N/A
1285	Os1129	Os42844	0.999983	4.55e-10		Os1285	MSTRG.279.5		A2J10_07T0162100.3	expressed protein	#N/A	#N/A
1286	Os1129	Os14402	0.999983	4.56e-10		Os1286	A2J10_07T0068800.1		MSTRG.23917.1	#N/A	peroxidase precursor, Putative, expressed	Similar to Peroxidase (EC 1.11.1.7).
1287	Os1129	Os39989	0.999983	4.57e-10		Os1287	MSTRG.16062.1		A2J10_08T0098500.1	rubredoxin family protein, Putative, expressed	#N/A	#N/A
1288	Os5130	Os38036	0.999983	4.57e-10		Os1288	A2J10_05T0139100.1		A2J10_02T0303300.1	Conserved hypothetical protein	#N/A	#N/A
1289	Os3626	Os14960	0.999983	4.58e-10		Os1289	A2J10_02T0166600.2		A2J10_06T0088100.1	lectin-like receptor kinase, Putative, expressed	Conserved hypothetical protein	Similar to OSIGBa0125M19.6 protein.
1290	Os3626	Os40249	0.999983	4.58e-10		Os1290	MSTRG.17836.2		A2J10_05T0072700.1	expressed protein	expressed protein	Conserved hypothetical protein.
1291	Os25155	Os37665	0.999983	4.59e-10		Os1291	A2J10_07T0150800.1		A2J10_01T0470200.1	Putative expressed protein	#N/A	#N/A
1292	Os3626	Os28344	0.999982	4.59e-10		Os1292	A2J10_10T0061300.1		A2J10_03T0276600.2	5-AMP-activated protein kinase-related, Putative, expressed	#N/A	#N/A
1293	Os3626	Os43951	0.999982	4.6e-10		Os1293	A2J10_12T0141700.1		MSTRG.6008.2	#N/A	recA protein, Putative, expressed	RecA bacterial DNA recombination family protein.
1294	Os1129	Os43078	0.999982	4.6e-10		Os1294	MSTRG.22354.2		MSTRG.17137.1	#N/A	Conserved hypothetical protein	#N/A
1295	Os5130	Os28575	0.999982	4.67e-10		Os1295	MSTRG.1526.1		A2J10_01T0105700.1	lipase, Putative, expressed	lipase, Putative, expressed	Similar to triacylglycerol lipase.
1296	Os5130	Os22209	0.999982	4.67e-10		Os1296	A2J10_05T0190600.1		MSTRG.20504.6	#N/A	#N/A	#N/A
1297	Os5130	Os43108	0.999982	4.68e-10		Os1297	A2J10_10T0094600.1		A2J10_05T0093300.5	N-acetylglucosaminyl transferase component, Putative, expressed	#N/A	#N/A
1298	Os3626	Os31948	0.999982	4.69e-10		Os1298	A2J10_04T0321800.2		MSTRG.11945.3	#N/A	#N/A	#N/A
1299	Os5130	Os13637	0.999982	4.69e-10		Os1299	A2J10_01T0487300.1		MSTRG.13198.3	#N/A	#N/A	Similar to HAT dimerisation domain-containing protein-like.
1300	Os1129	Os10555	0.999982	4.71e-10		Os1300	MSTRG.10425.6		A2J10_09T0178700.1	expressed protein	#N/A	#N/A
1301	Os25570	Os37427	0.999982	4.73e-10		Os1301	A2J10_03T0315800.4		A2J10_07T0246700.1	Conserved hypothetical protein	#N/A	#N/A
1302	Os1129	Os21828	0.999982	4.73e-10		Os1302	A2J10_04T0317800.1		MSTRG.10519.1	#N/A	homeobox associated leucine zipper, Putative, expressed	HD-ZIP I protein, Transcription activator, Stress response, Panicle development
1303	Os5130	Os33015	0.999982	4.74e-10		Os1303	A2J10_01T0303100.1		A2J10_01T0352700.1	Putative AP2 domain containing protein, expressed	AP2 domain containing protein, expressed	Similar to AP2 domain containing protein, expressed.
1304	Os5130	Os43648	0.999982	4.75e-10		Os1304	MSTRG.14305.2		MSTRG.17324.1	#N/A	#N/A	#N/A
1305	Os3626	Os20814	0.999982	4.76e-10		Os1305	MSTRG.23215.1		MSTRG.14196.16	#N/A	#N/A	#N/A
1306	Os1129	Os43358	0.999982	4.77e-10		Os1306	A2J10_01T0323400.1		A2J10_03T0236600.1	Putative expressed protein	#N/A	#N/A
1307	Os1129	Os29663	0.999982	4.78e-10		Os1307	A2J10_01T0299800.2		A2J10_11T0025600.1	Putative ankyrin repeat domain containing protein, expressed	expressed protein	Conserved hypothetical protein.
1308	Os1129	Os32200	0.999982	4.79e-10		Os1308	A2J10_05T0055000.1		MSTRG.15897.7	#N/A	expressed protein	#N/A
1309	Os5130	Os20814	0.999982	4.81e-10		Os1309	A2J10_05T0006900.1		A2J10_06T0033400.1	syntaxin, Putative, expressed	syntaxin, Putative, expressed	Similar to Syntaxin-like protein (Fragment).
1310	Os1129	Os41957	0.999982	4.83e-10		Os1310	MSTRG.17641.1		A2J10_05T0087600.1	transferase family protein, Putative, expressed	transferase family protein, Putative, expressed	Feruloyl-CoA monolignol transferase, Acyltransferase 5
1311	Os1129	Os16933	0.999982	4.84e-10		Os1311	A2J10_07T0213800.1		A2J10_03T0054600.1	STE_MEK_ste7_MAP2K.6 - STE kinases include homologs to sterile 7, sterile 11 and sterile 20 from yeast,expressed	STE_MEK_ste7_MAP2K.6 - STE kinases include homologs to sterile 7, sterile 11 and sterile 20 from yeast,expressed	Mitogen-activated protein kinase (MAPK) kinase, Disease resistance, Drought tolerance
1312	Os5130	Os42790	0.999982	4.85e-10		Os1312	MSTRG.23431.4		A2J10_03T0301400.4	Putative expressed protein	#N/A	Conserved hypothetical protein.
1313	Os5130	Os25441	0.999982	4.87e-10		Os1313	A2J10_04T0246700.1		MSTRG.15381.1	#N/A	OsWAK112d - OsWAK receptor-like protein kinase, expressed	Hypothetical conserved gene.
1314	Os3626	Os25478	0.999982	4.87e-10		Os1314	MSTRG.21119.1		A2J10_06T0210100.1	Conserved hypothetical protein	#N/A	#N/A
1315	Os28327	Os43925	0.999982	4.88e-10		Os1315	MSTRG.6109.1		MSTRG.4714.2	#N/A	RING finger and CHY zinc finger domain-containing protein 1, Putative, expressed	Similar to CHY zinc finger family protein, expressed.
1316	Os14322	Os29609	0.999982	4.9e-10		Os1316	A2J10_06T0097200.1		MSTRG.13005.6	#N/A	#N/A	#N/A
1317	Os3626	Os28675	0.999982	4.91e-10		Os1317	MSTRG.19443.1		MSTRG.15858.1	#N/A	helix-loop-helix DNA-binding domain containing protein, expressed	Hypothetical conserved gene.
1318	Os5130	Os38027	0.999982	4.93e-10		Os1318	MSTRG.5572.1		MSTRG.15559.1	#N/A	exostosin family domain containing protein, expressed	Similar to Pectin-glucuronyltransferase.
1319	Os5130	Os40969	0.999982	4.93e-10		Os1319	A2J10_05T0217700.1		MSTRG.8231.1	#N/A	No apical meristem protein, Putative, expressed	NAC transcription factor, Negative regulation of drought tolerance
1320	Os3626	Os11089	0.999982	4.94e-10		Os1320	A2J10_09T0206500.1		A2J10_01T0311400.1	potassium channel AKT1, Putative, expressed	potassium channel AKT1, Putative, expressed	Similar to predicted protein.
1321	Os5130	Os21744	0.999982	4.94e-10		Os1321	A2J10_06T0237900.1		A2J10_07T0239100.1	AP2 domain containing protein, expressed	AP2 domain containing protein, expressed	Similar to Ethylene response factor 2.
1322	Os1129	Os39974	0.999982	4.96e-10		Os1322	A2J10_01T0339900.1		A2J10_07T0131000.1	S-adenosylmethionine synthetase 2, Putative, expressed	#N/A	#N/A
1323	Os3626	Os42747	0.999982	4.96e-10		Os1323	A2J10_01T0416500.1		A2J10_03T0151000.1	peptidyl-tRNA hydrolase, mitochondrial precursor protein, Putative, expressed	#N/A	#N/A
1324	Os5130	Os25558	0.999982	4.98e-10		Os1324	A2J10_03T0130600.1		A2J10_02T0296900.1	harpin-induced protein 1 domain containing protein, expressed	harpin-induced protein 1 domain containing protein, expressed	Harpin-induced 1 domain containing protein.
1325	Os1129	Os40125	0.999982	4.99e-10		Os1325	A2J10_10T0104700.1		A2J10_10T0185300.2	Conserved hypothetical protein	#N/A	#N/A
1326	Os1129	Os11278	0.999982	4.99e-10		Os1326	MSTRG.16547.1		MSTRG.9013.1	#N/A	expressed protein	Disease resistance protein domain containing protein.
1327	Os3626	Os39456	0.999982	5.01e-10		Os1327	MSTRG.2886.1		MSTRG.6756.1	#N/A	Hypothetical protein	#N/A
1328	Os3626	Os40200	0.999982	5.01e-10		Os1328	A2J10_12T0011900.1		A2J10_03T0103700.1	Conserved hypothetical protein	cyclase/dehydrase family protein, Putative, expressed	ABA receptor, Drought tolerance
1329	Os3626	Os37346	0.999982	5.01e-10		Os1329	MSTRG.26409.1		MSTRG.14209.16	#N/A	#N/A	#N/A
1330	Os5130	Os10567	0.999982	5.02e-10		Os1330	A2J10_06T0258600.1		A2J10_07T0217400.1	esterase, Putative, expressed	esterase, Putative, expressed	Methyl esterase-like protein, Negative regulation of reactive oxygen species mediated broad-spectrum disease resistance
1331	Os1129	Os43546	0.999982	5.08e-10		Os1331	A2J10_07T0039100.1		MSTRG.889.3	#N/A	#N/A	#N/A
1332	Os1129	Os11693	0.999982	5.08e-10		Os1332	A2J10_06T0063500.1		MSTRG.22882.1	#N/A	zinc finger, RING-type, Putative, expressed	Hypothetical protein.
1333	Os3626	Os43900	0.999982	5.09e-10		Os1333	MSTRG.21721.1		A2J10_02T0071800.1	Conserved hypothetical protein	Conserved hypothetical protein	#N/A
1334	Os1129	Os37668	0.999982	5.09e-10		Os1334	A2J10_11T0029400.1		A2J10_01T0295200.1	dynamin family protein, Putative, expressed	dynamin family protein, Putative, expressed	Similar to Dynamin-related protein 1B (Dynamin-like protein B).
1335	Os5130	Os38717	0.999982	5.1e-10		Os1335	A2J10_01T0069900.1		MSTRG.25151.1	#N/A	#N/A	Transposase, IS4-like domain containing protein.
1336	Os3626	Os9728	0.999982	5.1e-10		Os1336	A2J10_03T0215100.1		MSTRG.19595.9	#N/A	#N/A	#N/A
1337	Os3626	Os21892	0.999981	5.17e-10		Os1337	MSTRG.22059.1		MSTRG.15201.3	#N/A	#N/A	#N/A
1338	Os5130	Os23872	0.999981	5.18e-10		Os1338	MSTRG.15399.2		MSTRG.2887.1	#N/A	#N/A	#N/A
1339	Os1129	Os23780	0.999981	5.18e-10		Os1339	MSTRG.3113.4		A2J10_11T0145000.1	rubredoxin family protein, Putative, expressed	rubredoxin family protein, Putative, expressed	Similar to Rubredoxin 1 (Rd-1).
1340	Os3626	Os25496	0.999981	5.19e-10		Os1340	A2J10_03T0369900.1		A2J10_12T0099200.1	NB-ARC domain containing disease resistance protein, Putative, expressed	#N/A	#N/A
1341	Os5130	Os30254	0.999981	5.2e-10		Os1341	A2J10_07T0197400.1		A2J10_01T0420000.1	Putative expressed protein	#N/A	#N/A
1342	Os5130	Os43713	0.999981	5.21e-10		Os1342	A2J10_04T0013700.1		MSTRG.11922.1	#N/A	NIN-like protein 2, Putative, expressed	Phox/Bem1p domain containing protein.
1343	Os1129	Os43297	0.999981	5.21e-10		Os1343	MSTRG.2939.1		A2J10_02T0254100.1	transferase family protein, Putative, expressed	#N/A	#N/A
1344	Os3626	Os42837	0.999981	5.22e-10		Os1344	A2J10_07T0180500.1		MSTRG.9911.3	#N/A	#N/A	#N/A
1345	Os1129	Os38426	0.999981	5.25e-10		Os1345	MSTRG.6835.5		A2J10_09T0019600.1	zinc finger, C3HC4 type domain containing protein, expressed	zinc finger, C3HC4 type domain containing protein, expressed	Zinc finger, RING/FYVE/PHD-type domain containing protein.
1346	Os3626	Os28809	0.999981	5.27e-10		Os1346	A2J10_10T0156300.1		MSTRG.1426.1	#N/A	#N/A	#N/A
1347	Os5130	Os21980	0.999981	5.27e-10		Os1347	A2J10_09T0038200.1		A2J10_06T0154300.1	magnesium-protoporphyrin O-methyltransferase, Putative, expressed	magnesium-protoporphyrin O-methyltransferase, Putative, expressed	#N/A
1348	Os5130	Os23907	0.999981	5.27e-10		Os1348	MSTRG.23238.2		MSTRG.20458.6	#N/A	#N/A	#N/A
1349	Os3626	Os42593	0.999981	5.27e-10		Os1349	A2J10_02T0342600.1		A2J10_05T0219400.3	DUF623 domain containing protein, expressed	#N/A	#N/A
1350	Os1129	Os38492	0.999981	5.28e-10		Os1350	A2J10_08T0027900.1		MSTRG.1083.3	#N/A	#N/A	#N/A
1351	Os3626	Os28571	0.999981	5.31e-10		Os1351	MSTRG.25298.1		A2J10_04T0066300.1	cysteine-rich receptor-like protein kinase, Putative, expressed	cysteine-rich receptor-like protein kinase, Putative, expressed	Protein of unknown function DUF26 domain containing protein.
1352	Os4820	Os39824	0.999981	5.31e-10		Os1352	A2J10_07T0295700.1		A2J10_03T0010800.2	GHMP kinases ATP-binding protein, Putative, expressed	#N/A	#N/A
1353	Os3626	Os37853	0.999981	5.33e-10		Os1353	A2J10_04T0248400.1		A2J10_02T0213300.1	tetratricopeptide repeat containing protein, Putative, expressed	tetratricopeptide repeat containing protein, Putative, expressed	Tetratricopeptide-like helical domain containing protein.
1354	Os5130	Os37839	0.999981	5.33e-10		Os1354	MSTRG.15770.1		MSTRG.26302.3	#N/A	#N/A	#N/A
1355	Os5130	Os32746	0.999981	5.34e-10		Os1355	A2J10_08T0028000.2		MSTRG.24870.1	#N/A	phospholipid-transporting ATPase, Putative, expressed	ATPase, P-type, K/Mg/Cd/Cu/Zn/Na/Ca/Na/H-transporter family protein.
1356	Os5130	Os18110	0.999981	5.34e-10		Os1356	A2J10_01T0024700.1		A2J10_06T0003600.1	arginine N-methyltransferase 7, Putative, expressed	arginine N-methyltransferase 7, Putative, expressed	Protein arginine methyltransferase
1357	Os1129	Os23501	0.999981	5.36e-10		Os1357	A2J10_03T0333400.1		A2J10_11T0165500.1	Putative expressed protein	#N/A	#N/A
1358	Os5130	Os10555	0.999981	5.37e-10		Os1358	A2J10_07T0194900.1		MSTRG.5139.1	#N/A	protein kinase, Putative, expressed	Protein kinase, catalytic domain domain containing protein.
1359	Os14322	Os38689	0.999981	5.38e-10		Os1359	A2J10_03T0127500.1		A2J10_07T0194700.1	polygalacturonase inhibitor 1 precursor, Putative, expressed	polygalacturonase inhibitor 1 precursor, Putative, expressed	Polygalacturonase-inhibiting protein, Inhibitor of fungal polygalacturonase, Regulation of floral organ number
1360	Os5130	Os13698	0.999981	5.45e-10		Os1360	MSTRG.23788.1		MSTRG.25919.8	#N/A	#N/A	#N/A
1361	Os5130	Os31014	0.999981	5.45e-10		Os1361	A2J10_08T0008300.1		MSTRG.2308.5	#N/A	#N/A	#N/A
1362	Os1129	Os43114	0.999981	5.46e-10		Os1362	A2J10_07T0270500.2		MSTRG.11376.10	#N/A	#N/A	#N/A
1363	Os5130	Os20872	0.999981	5.48e-10		Os1363	MSTRG.9922.1		MSTRG.14123.7	#N/A	#N/A	#N/A
1364	Os1129	Os42852	0.999981	5.52e-10		Os1364	A2J10_07T0296300.1		MSTRG.12973.2	#N/A	#N/A	#N/A
1365	Os3626	Os24177	0.999981	5.53e-10		Os1365	MSTRG.27146.1		MSTRG.15693.1	#N/A	OsAPx7 - Stromal Ascorbate Peroxidase encoding gene 5,8, expressed	#N/A
1366	Os1129	Os36849	0.999981	5.54e-10		Os1366	A2J10_01T0082700.1		MSTRG.16725.1	#N/A	no apical meristem protein, Putative, expressed	#N/A
1367	Os3626	Os31897	0.999981	5.56e-10		Os1367	A2J10_01T0265100.2		A2J10_01T0087500.1	C4-dicarboxylate transporter/malic acid transport protein, expressed	#N/A	#N/A
1368	Os1129	Os25971	0.999981	5.56e-10		Os1368	MSTRG.12194.5		A2J10_08T0160400.1	Putative DUF581 domain containing protein, expressed	DUF581 domain containing protein, expressed	Protein of unknown function DUF581 family protein.
1369	Os1129	Os39243	0.999981	5.58e-10		Os1369	MSTRG.24135.1		A2J10_12T0164300.1	DC1 domain-containing protein, Putative, expressed	DC1 domain-containing protein, Putative, expressed	DC1 domain containing protein.
1370	Os1129	Os22118	0.999981	5.58e-10		Os1370	A2J10_01T0493300.1		A2J10_02T0012600.1	expressed protein	expressed protein	Conserved hypothetical protein.
1371	Os3626	Os40857	0.999981	5.58e-10		Os1371	A2J10_12T0110800.1		A2J10_05T0205200.2	expressed protein	#N/A	#N/A
1372	Os1129	Os11089	0.999981	5.59e-10		Os1372	A2J10_01T0404700.1		MSTRG.23487.4	#N/A	#N/A	#N/A
1373	Os1129	Os40162	0.999981	5.61e-10		Os1373	MSTRG.20207.7		MSTRG.6507.1	#N/A	expressed protein	Leucine-rich repeat, N-terminal domain containing protein.
1374	Os1129	Os28912	0.999981	5.61e-10		Os1374	MSTRG.25570.2		MSTRG.6004.1	#N/A	#N/A	#N/A
1375	Os1129	Os43264	0.999981	5.64e-10		Os1375	MSTRG.6743.6		A2J10_01T0282100.1	Doubtful hypothetical protein	#N/A	#N/A
1376	Os5130	Os42419	0.999981	5.65e-10		Os1376	MSTRG.23623.1		MSTRG.6382.1	#N/A	#N/A	#N/A
1377	Os3626	Os8724	0.999981	5.66e-10		Os1377	A2J10_02T0307200.1		MSTRG.14193.3	#N/A	#N/A	#N/A
1378	Os28327	Os43966	0.999981	5.68e-10		Os1378	MSTRG.6196.1		A2J10_07T0030100.1	gibberellin receptor GID1L2, Putative, expressed	gibberellin receptor GID1L2, Putative, expressed	Alpha/beta hydrolase fold-3 domain containing protein.
1379	Os5130	Os43742	0.999981	5.69e-10		Os1379	MSTRG.899.1		A2J10_06T0147400.1	Putative expressed protein	expressed protein	Conserved hypothetical protein.
1380	Os1129	Os30903	0.999981	5.7e-10		Os1380	MSTRG.15700.1		MSTRG.18634.2	#N/A	#N/A	#N/A
1381	Os3626	Os41123	0.999981	5.7e-10		Os1381	A2J10_07T0286800.4		A2J10_04T0246000.4	expressed protein	#N/A	#N/A
1382	Os1129	Os43143	0.999981	5.7e-10		Os1382	A2J10_02T0207900.3		A2J10_01T0168600.1	OsGrx_C7 - glutaredoxin subgroup III, expressed	#N/A	#N/A
1383	Os5130	Os17195	0.99998	5.72e-10		Os1383	A2J10_02T0018700.1		MSTRG.23944.3	#N/A	#N/A	#N/A
1384	Os3626	Os17523	0.99998	5.73e-10		Os1384	MSTRG.6563.1		MSTRG.8785.9	#N/A	#N/A	#N/A
1385	Os3626	Os23170	0.99998	5.73e-10		Os1385	MSTRG.24683.1		MSTRG.5383.2	#N/A	#N/A	#N/A
1386	Os5130	Os11089	0.99998	5.74e-10		Os1386	MSTRG.6633.1		MSTRG.26438.3	#N/A	#N/A	#N/A
1387	Os1129	Os17851	0.99998	5.75e-10		Os1387	MSTRG.23116.1		A2J10_08T0074400.1	expressed protein	expressed protein	#N/A
1388	Os1129	Os28588	0.99998	5.75e-10		Os1388	A2J10_07T0191900.1		MSTRG.7647.1	#N/A	#N/A	#N/A
1389	Os5130	Os37955	0.99998	5.75e-10		Os1389	A2J10_05T0000500.1		A2J10_07T0111000.1	phospholipase D, Putative, expressed	#N/A	#N/A
1390	Os5130	Os25440	0.99998	5.77e-10		Os1390	A2J10_03T0335200.3		MSTRG.22124.1	#N/A	#N/A	#N/A
1391	Os3626	Os37987	0.99998	5.77e-10		Os1391	A2J10_03T0122100.1		A2J10_11T0046900.2	Putative expressed protein	#N/A	#N/A
1392	Os1129	Os21446	0.99998	5.78e-10		Os1392	A2J10_09T0094300.1		MSTRG.1631.1	#N/A	#N/A	#N/A
1393	Os3626	Os19069	0.99998	5.79e-10		Os1393	A2J10_02T0368300.1		A2J10_07T0175900.1	aspartic proteinase nepenthesin, Putative, expressed	aspartic proteinase nepenthesin, Putative, expressed	Peptidase A1 domain containing protein.
1394	Os5130	Os42521	0.99998	5.79e-10		Os1394	A2J10_03T0376800.2		MSTRG.25430.1	#N/A	#N/A	Hypothetical protein.
1395	Os5130	Os43623	0.99998	5.81e-10		Os1395	MSTRG.21337.1		MSTRG.12745.3	#N/A	#N/A	#N/A
1396	Os1129	Os38773	0.99998	5.82e-10		Os1396	A2J10_01T0486200.1		A2J10_01T0016900.1	seven in absentia protein family protein, expressed	seven in absentia protein family protein, expressed	Seven-in-absentia protein, sina domain containing protein.
1397	Os6301	Os23568	0.99998	5.83e-10		Os1397	MSTRG.23937.1		MSTRG.6253.1	#N/A	OsFBO4 - F-box and other domain containing protein, expressed	Similar to MYND finger family protein, expressed.
1398	Os14322	Os19479	0.99998	5.86e-10		Os1398	MSTRG.7575.1		MSTRG.23567.9	#N/A	#N/A	#N/A
1399	Os5130	Os43103	0.99998	5.87e-10		Os1399	A2J10_02T0305700.1		MSTRG.3788.6	#N/A	#N/A	#N/A
1400	Os1129	Os42795	0.99998	5.9e-10		Os1400	MSTRG.18645.1		MSTRG.14375.1	#N/A	#N/A	#N/A
1401	Os3626	Os35535	0.99998	5.9e-10		Os1401	MSTRG.17932.1		MSTRG.18669.1	#N/A	galactosyltransferase, Putative, expressed	Similar to RNA binding protein (Fragment).
1402	Os5130	Os37781	0.99998	5.9e-10		Os1402	MSTRG.12431.1		MSTRG.3668.1	#N/A	#N/A	#N/A
1403	Os25155	Os28791	0.99998	5.91e-10		Os1403	A2J10_01T0066200.1		MSTRG.25430.2	#N/A	#N/A	#N/A
1404	Os1129	Os18718	0.99998	5.91e-10		Os1404	A2J10_05T0103700.2		A2J10_06T0206400.1	expressed protein	expressed protein	Protein kinase, core domain containing protein.
1405	Os1129	Os32429	0.99998	5.91e-10		Os1405	A2J10_07T0229700.1		A2J10_11T0129700.1	WRKY72, expressed	#N/A	#N/A
1406	Os5130	Os42826	0.99998	5.93e-10		Os1406	A2J10_03T0345000.1		MSTRG.13039.1	#N/A	#N/A	#N/A
1407	Os1129	Os43617	0.99998	5.93e-10		Os1407	A2J10_02T0345200.1		A2J10_04T0082000.1	wall-associated receptor kinase 3 precursor, Putative, expressed	#N/A	#N/A
1408	Os3626	Os28754	0.99998	5.95e-10		Os1408	MSTRG.25427.5		MSTRG.23318.1	#N/A	sex determination protein tasselseed-2, Putative, expressed	Similar to Oxidoreductase, short chain dehydrogenase/reductase family protein, expressed.
1409	Os1129	Os31897	0.99998	5.95e-10		Os1409	MSTRG.13976.7		MSTRG.14277.4	#N/A	#N/A	#N/A
1410	Os1129	Os33015	0.99998	5.98e-10		Os1410	A2J10_02T0399300.1		MSTRG.5717.3	#N/A	#N/A	#N/A
1411	Os3626	Os35797	0.99998	6e-10		Os1411	A2J10_02T0363100.1		A2J10_02T0188300.3	Putative expressed protein	#N/A	#N/A
1412	Os1129	Os42845	0.99998	6e-10		Os1412	MSTRG.19246.10		A2J10_01T0207400.1	ELF3 protein, Putative, expressed	ELF3 protein, Putative, expressed	Conserved hypothetical protein.
1413	Os1129	Os28683	0.99998	6.03e-10		Os1413	A2J10_07T0190800.1		A2J10_12T0186000.2	Citrate transporter protein, Putative, expressed	#N/A	#N/A
1414	Os3626	Os11121	0.99998	6.08e-10		Os1414	MSTRG.14007.1		A2J10_02T0397400.11	#N/A	#N/A	#N/A
1415	Os3626	Os39938	0.99998	6.1e-10		Os1415	A2J10_12T0091800.1		A2J10_02T0300700.3	helix-loop-helix DNA-binding protein, Putative, expressed	#N/A	#N/A
1416	Os1129	Os43411	0.99998	6.11e-10		Os1416	A2J10_07T0217300.1		A2J10_07T0206400.1	GCN5-related N-acetyltransferase, Putative, expressed	#N/A	#N/A
1417	Os5130	Os28503	0.99998	6.12e-10		Os1417	MSTRG.16439.1		MSTRG.9190.2	#N/A	#N/A	#N/A
1418	Os1129	Os32884	0.99998	6.13e-10		Os1418	MSTRG.27087.1		MSTRG.5185.1	#N/A	#N/A	#N/A
1419	Os3626	Os28546	0.99998	6.13e-10		Os1419	MSTRG.6270.1		A2J10_08T0076900.1	CCT/B-box zinc finger protein, Putative, expressed	#N/A	#N/A
1420	Os1129	Os32094	0.99998	6.13e-10		Os1420	A2J10_10T0141300.1		A2J10_01T0031800.1	mitochondrial carrier protein, Putative, expressed	mitochondrial carrier protein, Putative, expressed	Adenine nucleotide translocator 1 domain containing protein.
1421	Os25155	Os31646	0.99998	6.14e-10		Os1421	A2J10_04T0159600.1		MSTRG.3118.2	#N/A	Putative expressed protein	Similar to Sucrose-phosphate synthase (EC 2.4.1.14).
1422	Os1129	Os43829	0.99998	6.15e-10		Os1422	A2J10_05T0106900.1		MSTRG.17619.6	#N/A	#N/A	#N/A
1423	Os1129	Os21178	0.99998	6.16e-10		Os1423	MSTRG.2229.1		MSTRG.18364.1	#N/A	receptor kinase, Putative, expressed	#N/A
1424	Os3626	Os25235	0.99998	6.16e-10		Os1424	MSTRG.8837.1		A2J10_02T0005000.1	expressed protein	#N/A	#N/A
1425	Os3626	Os25250	0.99998	6.18e-10		Os1425	MSTRG.14917.2		A2J10_04T0173300.1	B-box zinc finger family protein, Putative, expressed	B-box zinc finger family protein, Putative, expressed	BBX transcription factor, Regulation of heading date
1426	Os14322	Os42477	0.99998	6.18e-10		Os1426	MSTRG.7402.1		MSTRG.15534.1	#N/A	peroxidase precursor, Putative, expressed	Similar to Class III peroxidase GvPx2b (Fragment).
1427	Os1129	Os17346	0.99998	6.19e-10		Os1427	MSTRG.20039.1		A2J10_11T0175100.1	SEY1, Putative, expressed	SEY1, Putative, expressed	Similar to root hair defective 3 GTP-binding (RHD3) family protein.
1428	Os3626	Os25686	0.99998	6.19e-10		Os1428	MSTRG.14360.2		MSTRG.16620.1	#N/A	alpha-N-acetylglucosaminidase, Putative, expressed	Similar to Alpha-N-acetylglucosaminidase.
1429	Os5130	Os25346	0.99998	6.2e-10		Os1429	MSTRG.409.1		A2J10_03T0039200.2	Putative expressed protein	expressed protein	#N/A
1430	Os28327	Os39569	0.99998	6.2e-10		Os1430	MSTRG.8313.1		MSTRG.8408.1	#N/A	expressed protein	Similar to HIPL1 protein precursor.
1431	Os3626	Os37279	0.99998	6.21e-10		Os1431	A2J10_01T0388300.1		MSTRG.342.8	#N/A	#N/A	#N/A
1432	Os3626	Os38036	0.99998	6.24e-10		Os1432	A2J10_01T0271000.1		MSTRG.10369.1	#N/A	#N/A	#N/A
1433	Os1129	Os31363	0.99998	6.24e-10		Os1433	MSTRG.1049.1		MSTRG.9932.1	#N/A	expressed protein	Conserved hypothetical protein.
1434	Os14322	Os29475	0.99998	6.26e-10		Os1434	A2J10_05T0110700.2		A2J10_01T0225100.1	DNA repair protein Rad51, Putative, expressed	#N/A	#N/A
1435	Os5130	Os22158	0.99998	6.26e-10		Os1435	A2J10_07T0031100.1		MSTRG.21494.1	#N/A	#N/A	#N/A
1436	Os3626	Os42790	0.99998	6.27e-10		Os1436	A2J10_01T0258800.1		A2J10_03T0347700.1	acetyltransferase, GNAT family, Putative, expressed	acetyltransferase, GNAT family, Putative, expressed	Similar to N-acetyltransferase.
1437	Os3626	Os21599	0.99998	6.28e-10		Os1437	A2J10_12T0010000.3		A2J10_07T0232200.1	tetratricopeptide repeat, Putative, expressed	tetratricopeptide repeat, Putative, expressed	Tetratricopeptide-like helical domain containing protein.
1438	Os1129	Os44094	0.99998	6.29e-10		Os1438	A2J10_12T0017400.1		MSTRG.14396.7	#N/A	#N/A	#N/A
1439	Os3626	Os37992	0.999979	6.31e-10		Os1439	MSTRG.21625.1		MSTRG.25529.5	#N/A	#N/A	#N/A
1440	Os3626	Os30835	0.999979	6.32e-10		Os1440	A2J10_04T0206200.2		MSTRG.10528.2	#N/A	#N/A	#N/A
1441	Os1129	Os40506	0.999979	6.32e-10		Os1441	MSTRG.4932.2		MSTRG.2820.1	#N/A	receptor protein kinase, Putative, expressed	#N/A
1442	Os3626	Os42768	0.999979	6.33e-10		Os1442	A2J10_09T0159600.1		MSTRG.13350.4	#N/A	#N/A	#N/A
1443	Os3626	Os33372	0.999979	6.33e-10		Os1443	MSTRG.18856.1		MSTRG.1311.1	#N/A	#N/A	#N/A
1444	Os1129	Os28978	0.999979	6.33e-10		Os1444	A2J10_02T0119800.1		A2J10_10T0145200.1	cytochrome b561, Putative, expressed	cytochrome b561, Putative, expressed	Cytochrome b561 family protein.
1445	Os5130	Os31790	0.999979	6.34e-10		Os1445	MSTRG.17145.1		A2J10_09T0033200.1	Conserved hypothetical protein	#N/A	#N/A
1446	Os3626	Os28776	0.999979	6.35e-10		Os1446	A2J10_11T0136000.1		MSTRG.14948.2	#N/A	#N/A	#N/A
1447	Os3626	Os34969	0.999979	6.38e-10		Os1447	A2J10_01T0238100.2		MSTRG.9711.1	#N/A	#N/A	#N/A
1448	Os1129	Os27570	0.999979	6.38e-10		Os1448	A2J10_06T0085900.1		MSTRG.17036.1	#N/A	protein phosphatase 2C, Putative, expressed	Similar to Protein phosphatase 2C-like.
1449	Os1129	Os40354	0.999979	6.4e-10		Os1449	MSTRG.2378.1		MSTRG.12443.1	#N/A	#N/A	#N/A
1450	Os5130	Os27294	0.999979	6.4e-10		Os1450	A2J10_12T0045400.1		MSTRG.1432.1	#N/A	Conserved hypothetical protein	#N/A
1451	Os3626	Os43545	0.999979	6.41e-10		Os1451	MSTRG.1810.1		A2J10_05T0068800.1	sulfotransferase domain containing protein, expressed	sulfotransferase domain containing protein, expressed	Sulfotransferase family protein.
1452	Os1129	Os21279	0.999979	6.41e-10		Os1452	MSTRG.4843.1		A2J10_02T0366100.2	expressed protein	expressed protein	Conserved hypothetical protein.
1453	Os3626	Os21613	0.999979	6.41e-10		Os1453	A2J10_05T0205400.1		MSTRG.2527.2	#N/A	#N/A	#N/A
1454	Os5130	Os32930	0.999979	6.42e-10		Os1454	A2J10_01T0504400.1		A2J10_03T0114100.1	Conserved hypothetical protein	#N/A	#N/A
1455	Os3626	Os28503	0.999979	6.49e-10		Os1455	A2J10_03T0018200.1		A2J10_05T0104800.1	TKL_IRAK_CrRLK1L-1.3 - The CrRLK1L-1 subfamily has homology to the CrRLK1L homolog, expressed	#N/A	#N/A
1456	Os3626	Os35003	0.999979	6.49e-10		Os1456	MSTRG.18363.1		MSTRG.17191.2	#N/A	#N/A	#N/A
1457	Os3626	Os33094	0.999979	6.5e-10		Os1457	A2J10_11T0182200.1		MSTRG.17368.1	#N/A	#N/A	#N/A
1458	Os3626	Os42997	0.999979	6.51e-10		Os1458	MSTRG.20931.1		A2J10_11T0233800.1	Conserved hypothetical protein	#N/A	#N/A
1459	Os1129	Os10786	0.999979	6.53e-10		Os1459	A2J10_06T0151700.1		A2J10_05T0244200.1	expressed protein	expressed protein	Conserved hypothetical protein.
1460	Os1129	Os43824	0.999979	6.53e-10		Os1460	MSTRG.6451.1		MSTRG.24904.1	#N/A	#N/A	#N/A
1461	Os1129	Os43524	0.999979	6.53e-10		Os1461	MSTRG.25829.1		A2J10_01T0129900.1	expressed protein	Doubtful hypothetical protein	#N/A
1462	Os14322	Os33395	0.999979	6.54e-10		Os1462	A2J10_03T0259600.1		MSTRG.15556.2	#N/A	#N/A	#N/A
1463	Os5130	Os42762	0.999979	6.56e-10		Os1463	A2J10_01T0217900.1		A2J10_04T0078300.1	expressed protein	#N/A	#N/A
1464	Os28327	Os39825	0.999979	6.58e-10		Os1464	A2J10_03T0056800.1		MSTRG.12816.1	#N/A	#N/A	#N/A
1465	Os3626	Os40766	0.999979	6.59e-10		Os1465	A2J10_03T0041000.1		A2J10_09T0161400.1	expressed protein	expressed protein	Conserved hypothetical protein.
1466	Os5130	Os43555	0.999979	6.6e-10		Os1466	MSTRG.20504.1		A2J10_07T0093400.1	LTPL40 - Protease inhibitor/seed storage/LTP family protein precursor, expressed	#N/A	#N/A
1467	Os5130	Os42711	0.999979	6.6e-10		Os1467	A2J10_09T0149500.1		A2J10_02T0166600.1	cation transport regulator-like protein 1, Putative, expressed	#N/A	#N/A
1468	Os3626	Os21965	0.999979	6.61e-10		Os1468	A2J10_03T0103500.1		MSTRG.22860.9	#N/A	#N/A	#N/A
1469	Os1989	Os31678	0.999979	6.63e-10		Os1469	A2J10_12T0072700.1		MSTRG.19143.1	#N/A	zinc finger/CCCH transcription factor, Putative, expressed	Similar to Zing finger transcription factor PEI1.
1470	Os23734	Os35044	0.999979	6.63e-10		Os1470	A2J10_01T0415800.1		A2J10_03T0012900.1	hydroxymethylglutaryl-CoA synthase, Putative, expressed	expressed protein	Armadillo-type fold domain containing protein.
1471	Os3626	Os24964	0.999979	6.64e-10		Os1471	A2J10_07T0182000.1		MSTRG.22299.4	#N/A	#N/A	#N/A
1472	Os1129	Os43747	0.999979	6.64e-10		Os1472	A2J10_01T0085800.1		A2J10_01T0143200.1	zinc finger, C3HC4 type domain containing protein, expressed	zinc finger, C3HC4 type domain containing protein, expressed	Similar to RING-H2 finger protein ATL2L.
1473	Os3626	Os22057	0.999979	6.65e-10		Os1473	MSTRG.24243.3		A2J10_04T0177600.4	ethylene-responsive transcription factor, Putative, expressed	#N/A	#N/A
1474	Os3626	Os28731	0.999979	6.66e-10		Os1474	MSTRG.9886.1		A2J10_03T0045600.1	retrotransposon protein, Putative, unclassified, expressed	retrotransposon protein, Putative, unclassified, expressed	VQ domain containing protein.
1475	Os5130	Os37729	0.999979	6.67e-10		Os1475	MSTRG.1047.1		A2J10_07T0140000.1	hydroxylase, Putative, expressed	#N/A	#N/A
1476	Os1129	Os42979	0.999979	6.68e-10		Os1476	MSTRG.25925.1		MSTRG.10094.6	#N/A	#N/A	#N/A
1477	Os28327	Os43111	0.999979	6.68e-10		Os1477	A2J10_05T0226100.1		MSTRG.20960.1	#N/A	#N/A	#N/A
1478	Os3626	Os17729	0.999979	6.73e-10		Os1478	A2J10_02T0385900.1		MSTRG.10759.1	#N/A	#N/A	#N/A
1479	Os5130	Os28759	0.999979	6.75e-10		Os1479	A2J10_03T0127800.1		MSTRG.10593.1	#N/A	phosphatase, Putative, expressed	Phosphatidic acid phosphatase type 2/haloperoxidase domain containing protein.
1480	Os28327	Os38110	0.999979	6.76e-10		Os1480	A2J10_08T0054500.1		A2J10_06T0291700.1	expressed protein	#N/A	#N/A
1481	Os3626	Os18127	0.999979	6.78e-10		Os1481	A2J10_05T0196900.1		A2J10_04T0160400.1	transposon protein, Putative, unclassified, expressed	#N/A	#N/A
1482	Os1129	Os38384	0.999979	6.79e-10		Os1482	A2J10_07T0139000.2		MSTRG.3148.1	#N/A	#N/A	#N/A
1483	Os4820	Os39658	0.999979	6.81e-10		Os1483	A2J10_05T0007200.1		A2J10_11T0126100.3	cytochrome P450, Putative, expressed	cytochrome P450, Putative, expressed	Hypothetical gene.
1484	Os1129	Os42903	0.999979	6.81e-10		Os1484	A2J10_06T0002200.1		MSTRG.5250.5	#N/A	#N/A	#N/A
1485	Os1129	Os43720	0.999979	6.82e-10		Os1485	MSTRG.4279.2		MSTRG.5533.2	#N/A	Conserved hypothetical protein	Ankyrin repeat domain containing protein.
1486	Os1129	Os36257	0.999979	6.82e-10		Os1486	MSTRG.8128.4		A2J10_02T0329200.1	slowmo homolog, Putative, expressed	slowmo homolog, Putative, expressed	MSF1 domain containing protein.
1487	Os3626	Os8325	0.999979	6.84e-10		Os1487	MSTRG.24822.1		MSTRG.18050.7	#N/A	#N/A	#N/A
1488	Os1129	Os42739	0.999979	6.85e-10		Os1488	A2J10_08T0195000.1		A2J10_09T0208800.1	transposon protein, Putative, CACTA, En/Spm sub-class, expressed	#N/A	#N/A
1489	Os3626	Os28333	0.999979	6.86e-10		Os1489	A2J10_04T0114500.1		A2J10_03T0187800.1	plastocyanin-like domain containing protein, Putative, expressed	#N/A	#N/A
1490	Os3626	Os20787	0.999979	6.88e-10		Os1490	A2J10_03T0027600.2		MSTRG.5107.1	#N/A	CHIT14 - Chitinase family protein precursor, expressed	Class II chitinase a, Pathogenesis-related (PR)-3 chitinase 8
1491	Os3626	Os27630	0.999979	6.88e-10		Os1491	A2J10_02T0064100.2		MSTRG.24494.3	#N/A	#N/A	#N/A
1492	Os5130	Os42699	0.999979	6.88e-10		Os1492	A2J10_01T0085200.1		A2J10_04T0144200.1	CCT/B-box zinc finger protein, Putative, expressed	#N/A	#N/A
1493	Os1129	Os31467	0.999979	6.89e-10		Os1493	MSTRG.10919.2		MSTRG.6321.1	#N/A	#N/A	#N/A
1494	Os14322	Os26376	0.999979	6.9e-10		Os1494	MSTRG.370.1		MSTRG.7681.1	#N/A	ATPase 3, Putative, expressed	ATPase, AAA-type, core domain containing protein.
1495	Os3626	Os11693	0.999979	6.91e-10		Os1495	A2J10_04T0216200.1		MSTRG.18799.1	#N/A	#N/A	#N/A
1496	Os3626	Os43008	0.999979	6.91e-10		Os1496	A2J10_12T0076100.1		A2J10_03T0025000.3	ribonuclease protein, Putative, expressed	#N/A	#N/A
1497	Os5130	Os31952	0.999978	6.94e-10		Os1497	A2J10_03T0007000.1		A2J10_05T0121600.1	expressed protein	#N/A	#N/A
1498	Os3626	Os42854	0.999978	6.95e-10		Os1498	A2J10_12T0034900.1		A2J10_03T0391600.5	2-isopropylmalate synthase B, Putative, expressed	#N/A	#N/A
1499	Os3626	Os28595	0.999978	6.96e-10		Os1499	MSTRG.21518.1		MSTRG.19521.1	#N/A	#N/A	#N/A
1500	Os1129	Os31759	0.999978	6.96e-10		Os1500	MSTRG.9889.2		MSTRG.11818.3	#N/A	#N/A	#N/A
1501	Os1129	Os28426	0.999978	6.97e-10		Os1501	MSTRG.1283.2		A2J10_07T0282500.1	ultraviolet-B-repressible protein, Putative, expressed	#N/A	#N/A
1502	Os5130	Os18337	0.999978	6.97e-10		Os1502	MSTRG.16916.3		A2J10_08T0166800.1	plant viral response family protein, Putative, expressed	plant viral response family protein, Putative, expressed	Protein of unknown function DUF716 family protein.
1503	Os5130	Os38080	0.999978	7.01e-10		Os1503	MSTRG.188.1		A2J10_02T0080400.1	receptor-like protein kinase precursor, Putative, expressed	#N/A	#N/A
1504	Os1129	Os37977	0.999978	7.03e-10		Os1504	MSTRG.12029.1		MSTRG.19060.6	#N/A	#N/A	#N/A
1505	Os3626	Os42901	0.999978	7.04e-10		Os1505	A2J10_06T0158200.1		MSTRG.22729.5	#N/A	#N/A	#N/A
1506	Os1129	Os41515	0.999978	7.05e-10		Os1506	A2J10_03T0165100.1		A2J10_02T0048500.1	MYB family transcription factor, Putative, expressed	MYB family transcription factor, Putative, expressed	Similar to Transfactor-like protein.
1507	Os5130	Os24979	0.999978	7.07e-10		Os1507	A2J10_02T0262300.1		MSTRG.20287.5	#N/A	#N/A	#N/A
1508	Os3626	Os23501	0.999978	7.07e-10		Os1508	MSTRG.365.1		MSTRG.18454.2	#N/A	#N/A	#N/A
1509	Os5130	Os21576	0.999978	7.07e-10		Os1509	A2J10_07T0250900.3		MSTRG.88.1	#N/A	receptor-like kinase ARK1AS, Putative, expressed	Similar to Receptor-like protein kinase.
1510	Os5130	Os22180	0.999978	7.09e-10		Os1510	A2J10_11T0096100.1		A2J10_10T0152100.3	Putative FAD dependent oxidoreductase domain containing protein, expressed	#N/A	#N/A
1511	Os3626	Os42535	0.999978	7.1e-10		Os1511	A2J10_08T0063600.1		MSTRG.2704.3	#N/A	#N/A	#N/A
1512	Os3626	Os37363	0.999978	7.11e-10		Os1512	A2J10_12T0158900.1		A2J10_11T0018500.1	expressed protein	#N/A	#N/A
1513	Os1129	Os42275	0.999978	7.12e-10		Os1513	MSTRG.2048.1		A2J10_09T0108300.1	growth regulator related protein, Putative, expressed	growth regulator related protein, Putative, expressed	Protein of unknown function DUF246, plant family protein.
1514	Os3626	Os30561	0.999978	7.13e-10		Os1514	A2J10_02T0292600.1		MSTRG.7741.1	#N/A	#N/A	#N/A
1515	Os5130	Os40745	0.999978	7.13e-10		Os1515	MSTRG.9674.4		MSTRG.13457.4	#N/A	#N/A	#N/A
1516	Os3626	Os18377	0.999978	7.14e-10		Os1516	A2J10_05T0242600.1		MSTRG.24218.3	#N/A	NADPH-dependent FMN reductase domain containing protein, expressed	Similar to F-171-b1_1 (Fragment).
1517	Os25570	Os28628	0.999978	7.17e-10		Os1517	MSTRG.21121.2		A2J10_03T0205100.1	transcription initiation factor, Putative, expressed	#N/A	#N/A
1518	Os1129	Os31229	0.999978	7.19e-10		Os1518	A2J10_04T0246800.1		MSTRG.3271.5	#N/A	#N/A	#N/A
1519	Os5130	Os37991	0.999978	7.2e-10		Os1519	A2J10_01T0115200.1		A2J10_02T0292400.1	transmembrane amino acid transporter protein, Putative, expressed	transmembrane amino acid transporter protein, Putative, expressed	Similar to amino acid transport protein.
1520	Os5130	Os40498	0.999978	7.22e-10		Os1520	A2J10_11T0203400.1		MSTRG.16211.2	#N/A	#N/A	#N/A
1521	Os3626	Os24936	0.999978	7.23e-10		Os1521	A2J10_01T0108600.2		MSTRG.22980.1	#N/A	NBS-LRR type disease resistance protein Hom-F, Putative, expressed	Leucine-rich repeat, typical subtype containing protein.
1522	Os3626	Os40219	0.999978	7.27e-10		Os1522	A2J10_11T0116600.2		A2J10_02T0245800.2	mTERF domain containing protein, expressed	#N/A	#N/A
1523	Os1129	Os28904	0.999978	7.28e-10		Os1523	A2J10_01T0161000.1		A2J10_01T0305900.1	peroxisomal N-acetyl-spermine/spermidine oxidase precursor, Putative, expressed	peroxisomal N-acetyl-spermine/spermidine oxidase precursor, Putative, expressed	Polyamine oxidase, Polyamine catabolism
1524	Os3626	Os41141	0.999978	7.29e-10		Os1524	A2J10_04T0320500.1		MSTRG.4252.2	#N/A	#N/A	#N/A
1525	Os14322	Os19324	0.999978	7.29e-10		Os1525	MSTRG.9048.1		A2J10_02T0390700.1	pheophorbide a oxygenase, chloroplast precursor, Putative, expressed	pheophorbide a oxygenase, chloroplast precursor, Putative, expressed	Similar to Rieske iron-sulfur protein Tic55 precursor.
1526	Os1129	Os37544	0.999978	7.3e-10		Os1526	A2J10_03T0007300.1		MSTRG.27052.11	#N/A	#N/A	#N/A
1527	Os3626	Os22321	0.999978	7.31e-10		Os1527	A2J10_11T0014400.1		A2J10_04T0095000.1	tRNA nucleotidyltransferase/polyA polymerase family protein, Putative, expressed	tRNA nucleotidyltransferase/polyA polymerase family protein, Putative, expressed	Polynucleotide adenylyltransferase region domain containing protein.
1528	Os3626	Os31014	0.999978	7.31e-10		Os1528	MSTRG.6970.1		A2J10_09T0205600.1	Putative expressed protein	#N/A	#N/A
1529	Os1129	Os15007	0.999978	7.35e-10		Os1529	MSTRG.24860.1		MSTRG.23295.2	#N/A	#N/A	#N/A
1530	Os3626	Os4678	0.999978	7.36e-10		Os1530	A2J10_01T0250400.3		A2J10_04T0244600.3	Conserved hypothetical protein	#N/A	#N/A
1531	Os3626	Os17807	0.999978	7.38e-10		Os1531	A2J10_11T0139300.2		A2J10_08T0116200.3	lipid phosphatase protein, Putative, expressed	#N/A	#N/A
1532	Os3626	Os30180	0.999978	7.4e-10		Os1532	A2J10_04T0018900.1		MSTRG.21147.1	#N/A	#N/A	#N/A
1533	Os5130	Os25676	0.999978	7.41e-10		Os1533	A2J10_02T0134500.1		A2J10_04T0122800.3	Conserved hypothetical protein	#N/A	#N/A
1534	Os5130	Os37711	0.999978	7.46e-10		Os1534	MSTRG.7924.1		A2J10_02T0024300.1	expressed protein	expressed protein	Hypothetical conserved gene.
1535	Os3626	Os37215	0.999978	7.47e-10		Os1535	MSTRG.4768.1		A2J10_01T0250900.1	ThiF family domain containing protein, Putative, expressed	ThiF family domain containing protein, Putative, expressed	Rice homolog of ATG7, Autophagy-related protein, Autophagy-dependent lipid metabolism in anther development, Autophagy-mediated regulation of starch metabolism during seed maturation
1536	Os3626	Os6361	0.999978	7.5e-10		Os1536	MSTRG.13167.3		MSTRG.4982.4	#N/A	#N/A	#N/A
1537	Os14322	Os19310	0.999978	7.5e-10		Os1537	A2J10_03T0187000.2		MSTRG.9082.1	#N/A	#N/A	#N/A
1538	Os5130	Os25512	0.999978	7.54e-10		Os1538	A2J10_05T0240600.1		A2J10_10T0148300.3	Conserved hypothetical protein	#N/A	#N/A
1539	Os3626	Os42536	0.999978	7.54e-10		Os1539	A2J10_06T0259300.1		MSTRG.22412.1	#N/A	#N/A	#N/A
1540	Os5130	Os42745	0.999977	7.6e-10		Os1540	A2J10_02T0300900.1		MSTRG.17226.1	#N/A	OsFBX438 - F-box domain containing protein, expressed	Hypothetical conserved gene.
1541	Os3626	Os21679	0.999977	7.61e-10		Os1541	A2J10_04T0320600.1		MSTRG.19633.1	#N/A	#N/A	#N/A
1542	Os1129	Os44175	0.999977	7.62e-10		Os1542	MSTRG.15966.1		MSTRG.5063.3	#N/A	#N/A	#N/A
1543	Os28327	Os43107	0.999977	7.63e-10		Os1543	MSTRG.15999.1		A2J10_02T0258900.1	receptor-like protein kinase 5 precursor, Putative, expressed	#N/A	#N/A
1544	Os5130	Os34753	0.999977	7.64e-10		Os1544	A2J10_05T0000200.1		A2J10_11T0008200.3	nucleotidyltransferase, Putative, expressed	#N/A	#N/A
1545	Os5130	Os39025	0.999977	7.64e-10		Os1545	A2J10_02T0274300.1		A2J10_11T0070200.1	sucrose-phosphate synthase, Putative, expressed	sucrose-phosphate synthase, Putative, expressed	Similar to Sucrose-phosphate synthase.
1546	Os3626	Os42935	0.999977	7.65e-10		Os1546	A2J10_03T0253000.1		MSTRG.1254.1	#N/A	importin subunit alpha, Putative, expressed	Similar to Importin alpha-1b subunit.
1547	Os3626	Os33367	0.999977	7.67e-10		Os1547	A2J10_01T0073900.1		A2J10_03T0229400.2	disease resistance RPP13-like protein 1, Putative, expressed	#N/A	#N/A
1548	Os3626	Os21787	0.999977	7.69e-10		Os1548	MSTRG.16657.1		A2J10_11T0061300.1	expressed protein	#N/A	#N/A
1549	Os3626	Os10292	0.999977	7.7e-10		Os1549	A2J10_08T0178000.1		MSTRG.25071.1	#N/A	agenet domain containing protein, expressed	Bromo adjacent region domain containing protein.
1550	Os3626	Os20986	0.999977	7.71e-10		Os1550	A2J10_04T0239600.1		MSTRG.22413.3	#N/A	#N/A	#N/A
1551	Os3626	Os10567	0.999977	7.72e-10		Os1551	MSTRG.9390.2		MSTRG.5453.3	#N/A	#N/A	#N/A
1552	Os3626	Os25715	0.999977	7.73e-10		Os1552	A2J10_01T0304700.1		MSTRG.1365.14	#N/A	#N/A	#N/A
1553	Os1129	Os37589	0.999977	7.76e-10		Os1553	A2J10_02T0377000.1		MSTRG.2022.3	#N/A	#N/A	#N/A
1554	Os5130	Os35915	0.999977	7.76e-10		Os1554	A2J10_06T0087100.1		MSTRG.27039.11	#N/A	#N/A	#N/A
1555	Os3626	Os42782	0.999977	7.77e-10		Os1555	MSTRG.20044.1		A2J10_03T0260600.1	thaumatin, Putative, expressed	#N/A	#N/A
1556	Os5130	Os38701	0.999977	7.78e-10		Os1556	A2J10_04T0221500.1		A2J10_03T0096600.1	phosphatidylinositol transfer protein alpha isoform, Putative, expressed	phosphatidylinositol transfer protein alpha isoform, Putative, expressed	#N/A
1557	Os14322	Os22941	0.999977	7.82e-10		Os1557	A2J10_05T0095600.1		A2J10_03T0262000.1	Putative OsFBL46 - F-box domain and LRR containing protein, expressed	#N/A	#N/A
1558	Os5130	Os24973	0.999977	7.82e-10		Os1558	A2J10_11T0237700.1		A2J10_12T0004400.1	ubiquitin-like protein 5, Putative, expressed	#N/A	#N/A
1559	Os1129	Os31048	0.999977	7.82e-10		Os1559	MSTRG.12824.4		A2J10_03T0359800.3	hydrolase, NUDIX family, domain containing protein, expressed	hydrolase, NUDIX family, domain containing protein, expressed	#N/A
1560	Os4736	Os4822	0.999977	7.83e-10		Os1560	MSTRG.14732.1		MSTRG.6057.1	#N/A	#N/A	#N/A
1561	Os1129	Os42241	0.999977	7.84e-10		Os1561	MSTRG.5817.1		MSTRG.22935.3	#N/A	#N/A	#N/A
1562	Os1129	Os18007	0.999977	7.85e-10		Os1562	MSTRG.16359.1		A2J10_07T0208200.1	Conserved hypothetical protein	spotted leaf 11, Putative, expressed	Armadillo-like helical domain containing protein.
1563	Os3626	Os34324	0.999977	7.85e-10		Os1563	A2J10_03T0277600.1		MSTRG.20778.2	#N/A	#N/A	#N/A
1564	Os3626	Os11869	0.999977	7.86e-10		Os1564	MSTRG.23120.1		A2J10_01T0393000.1	spotted leaf 11, Putative, expressed	spotted leaf 11, Putative, expressed	U-box E3ubiquitin ligase, Positive regulation of cold stress response
1565	Os5130	Os37915	0.999977	7.86e-10		Os1565	A2J10_02T0320500.1		MSTRG.14560.3	#N/A	#N/A	#N/A
1566	Os3626	Os11862	0.999977	7.87e-10		Os1566	A2J10_02T0009400.3		A2J10_08T0207600.3	peroxidase precursor, Putative, expressed	#N/A	#N/A
1567	Os3626	Os40544	0.999977	7.95e-10		Os1567	MSTRG.9928.1		A2J10_07T0178100.1	Putative TKL_IRAK_DUF26-lc.14 - DUF26 kinases have homology to DUF26 containing loci, expressed	TKL_IRAK_DUF26-lc.11 - DUF26 kinases have homology to DUF26 containing loci, expressed	Hypothetical conserved gene.
1568	Os3626	Os43597	0.999977	7.95e-10		Os1568	A2J10_08T0185200.1		MSTRG.1350.1	#N/A	#N/A	Pathogenesis-related protein, Disease resistance
1569	Os5130	Os43663	0.999977	7.95e-10		Os1569	MSTRG.13540.1		MSTRG.3839.4	#N/A	cytochrome P450, Putative, expressed	Cytochrome P450 family protein.
1570	Os5130	Os17516	0.999977	7.95e-10		Os1570	MSTRG.17954.2		A2J10_09T0108400.1	EF hand family protein, Putative, expressed	EF hand family protein, Putative, expressed	Hypothetical genes.
1571	Os3626	Os41016	0.999977	7.96e-10		Os1571	A2J10_01T0036600.3		MSTRG.3826.1	#N/A	#N/A	#N/A
1572	Os3626	Os21676	0.999977	7.96e-10		Os1572	A2J10_01T0284100.1		MSTRG.24935.1	#N/A	#N/A	#N/A
1573	Os5130	Os13774	0.999977	7.96e-10		Os1573	A2J10_10T0184700.1		A2J10_04T0211900.1	naringenin,2-oxoglutarate 3-dioxygenase, Putative, expressed	naringenin,2-oxoglutarate 3-dioxygenase, Putative, expressed	Similar to Flavanone 3-hydroxylase (Fragment).
1574	Os3626	Os38876	0.999977	7.97e-10		Os1574	A2J10_04T0287100.1		A2J10_08T0176400.3	expressed protein	#N/A	#N/A
1575	Os5130	Os19316	0.999977	7.98e-10		Os1575	MSTRG.27139.2		MSTRG.26659.3	#N/A	#N/A	#N/A
1576	Os1129	Os28223	0.999977	7.99e-10		Os1576	MSTRG.18853.1		MSTRG.12148.1	#N/A	dehydrogenase, Putative, expressed	Similar to Alcohol dehydrogenase.
1577	Os1129	Os31525	0.999977	8.02e-10		Os1577	A2J10_02T0361500.1		A2J10_07T0257200.1	expressed protein	#N/A	#N/A
1578	Os4820	Os40886	0.999977	8.02e-10		Os1578	A2J10_08T0182600.1		A2J10_10T0185400.1	beta-amylase, Putative, expressed	beta-amylase, Putative, expressed	Similar to Beta-amylase PCT-BMYI (EC 3.2.1.2).
1579	Os3626	Os34553	0.999977	8.03e-10		Os1579	A2J10_09T0027300.3		A2J10_08T0093600.1	Hypothetical protein	#N/A	#N/A
1580	Os3626	Os39893	0.999977	8.05e-10		Os1580	MSTRG.16737.21		A2J10_12T0113200.1	O-sialoglycoprotein endopeptidase, Putative, expressed	#N/A	#N/A
1581	Os3626	Os30940	0.999977	8.05e-10		Os1581	A2J10_03T0068000.1		MSTRG.3204.2	#N/A	#N/A	#N/A
1582	Os5130	Os29896	0.999977	8.06e-10		Os1582	MSTRG.13682.1		A2J10_01T0448500.2	serine/threonine-protein kinase RIO-like, Putative, expressed	#N/A	#N/A
1583	Os3626	Os25138	0.999977	8.06e-10		Os1583	A2J10_01T0334200.1		MSTRG.125.7	#N/A	#N/A	#N/A
1584	Os3626	Os25404	0.999977	8.12e-10		Os1584	A2J10_06T0213700.1		A2J10_01T0255600.1	glycosyltransferase family protein 1, Putative, expressed	glycosyltransferase family protein 1, Putative, expressed	Similar to predicted protein.
1585	Os5130	Os7288	0.999977	8.14e-10		Os1585	MSTRG.14074.1		MSTRG.14828.2	#N/A	#N/A	#N/A
1586	Os1129	Os42510	0.999977	8.14e-10		Os1586	MSTRG.19289.1		MSTRG.14263.1	#N/A	#N/A	#N/A
1587	Os5130	Os11278	0.999977	8.19e-10		Os1587	MSTRG.17875.1		A2J10_03T0030600.1	protein-methionine-S-oxide reductase, Putative, expressed	protein-methionine-S-oxide reductase, Putative, expressed	Similar to protein-methionine-s-oxide reductase.
1588	Os1129	Os43760	0.999977	8.21e-10		Os1588	A2J10_01T0164700.2		A2J10_08T0214100.1	Sua5/YciO/YrdC/YwlC family protein, Putative, expressed	Sua5/YciO/YrdC/YwlC family protein, Putative, expressed	DHBP synthase RibB-like alpha/beta domain domain containing protein.
1589	Os3626	Os35910	0.999977	8.21e-10		Os1589	MSTRG.11530.2		A2J10_04T0118200.1	expressed protein	expressed protein	Similar to OSIGBa0160I14.1 protein.
1590	Os3626	Os25441	0.999977	8.24e-10		Os1590	MSTRG.27043.2		A2J10_07T0156600.3	expressed protein	#N/A	#N/A
1591	Os3626	Os35074	0.999977	8.25e-10		Os1591	MSTRG.900.2		A2J10_01T0250300.1	xylem cysteine proteinase 2 precursor, Putative, expressed	xylem cysteine proteinase 2 precursor, Putative, expressed	Peptidase C1A, papain family protein.
1592	Os3626	Os39727	0.999977	8.26e-10		Os1592	MSTRG.12573.1		MSTRG.10368.1	#N/A	#N/A	#N/A
1593	Os3626	Os28248	0.999976	8.29e-10		Os1593	MSTRG.5781.1		MSTRG.12862.9	#N/A	#N/A	#N/A
1594	Os4820	Os21632	0.999976	8.35e-10		Os1594	MSTRG.21277.1		MSTRG.10686.1	#N/A	#N/A	#N/A
1595	Os1129	Os43820	0.999976	8.35e-10		Os1595	A2J10_04T0187100.1		A2J10_02T0252700.1	receptor kinase, Putative, expressed	receptor kinase, Putative, expressed	Leucine-rich repeat, N-terminal domain containing protein.
1596	Os5130	Os25035	0.999976	8.37e-10		Os1596	MSTRG.19660.2		MSTRG.7842.1	#N/A	#N/A	#N/A
1597	Os5130	Os25630	0.999976	8.42e-10		Os1597	A2J10_06T0187200.1		MSTRG.3903.1	#N/A	expressed protein	Conserved hypothetical protein.
1598	Os3626	Os25558	0.999976	8.45e-10		Os1598	MSTRG.21522.1		MSTRG.16517.5	#N/A	expressed protein	Similar to UPF0195 protein CG30152.
1599	Os3626	Os32096	0.999976	8.48e-10		Os1599	MSTRG.17922.3		MSTRG.15074.4	#N/A	#N/A	#N/A
1600	Os5130	Os23305	0.999976	8.49e-10		Os1600	MSTRG.7911.2		MSTRG.23437.2	#N/A	#N/A	#N/A
1601	Os3626	Os25688	0.999976	8.5e-10		Os1601	MSTRG.7218.1		MSTRG.17209.1	#N/A	#N/A	#N/A
1602	Os3626	Os21116	0.999976	8.54e-10		Os1602	MSTRG.24452.2		MSTRG.23787.5	#N/A	#N/A	#N/A
1603	Os1129	Os32471	0.999976	8.55e-10		Os1603	A2J10_02T0188200.1		MSTRG.19207.2	#N/A	#N/A	#N/A
1604	Os5130	Os42747	0.999976	8.55e-10		Os1604	A2J10_03T0160000.1		A2J10_12T0033200.2	dehydrogenase E1 component domain containing protein, expressed	#N/A	#N/A
1605	Os5130	Os10786	0.999976	8.58e-10		Os1605	A2J10_03T0342900.1		A2J10_03T0296700.1	expressed protein	expressed protein	Similar to ABRH7 (Fragment).
1606	Os3626	Os34178	0.999976	8.6e-10		Os1606	MSTRG.25962.1		A2J10_01T0325200.1	receptor-like protein kinase 5 precursor, Putative, expressed	receptor-like protein kinase 5 precursor, Putative, expressed	Hypothetical conserved gene.
1607	Os5130	Os32273	0.999976	8.63e-10		Os1607	A2J10_02T0289900.2		MSTRG.3736.2	#N/A	#N/A	#N/A
1608	Os5130	Os43936	0.999976	8.64e-10		Os1608	A2J10_03T0303900.1		A2J10_11T0166600.1	receptor-like protein kinase 2 precursor, Putative, expressed	receptor-like protein kinase 2 precursor, Putative, expressed	Similar to Receptor kinase-like protein.
1609	Os1129	Os32673	0.999976	8.65e-10		Os1609	MSTRG.24389.5		MSTRG.9893.1	#N/A	ERD1 protein, chloroplast precursor, Putative, expressed	Caseinolytic protease regulatory ATPase module, Intrinsic chaperone, Tolerance to salt and desiccation stresses
1610	Os5130	Os28851	0.999976	8.65e-10		Os1610	A2J10_01T0070700.1		MSTRG.20335.7	#N/A	#N/A	#N/A
1611	Os1129	Os32409	0.999976	8.66e-10		Os1611	A2J10_04T0025600.1		A2J10_03T0244700.1	START domain containing protein, expressed	#N/A	Hypothetical protein.
1612	Os3626	Os39551	0.999976	8.66e-10		Os1612	A2J10_01T0018300.2		MSTRG.11504.13	#N/A	expressed protein	#N/A
1613	Os4820	Os39681	0.999976	8.67e-10		Os1613	MSTRG.13042.1		A2J10_11T0154600.1	plant protein of unknown function domain containing protein, expressed	#N/A	#N/A
1614	Os1129	Os25447	0.999976	8.68e-10		Os1614	A2J10_01T0225900.4		MSTRG.23322.1	#N/A	#N/A	#N/A
1615	Os1129	Os32372	0.999976	8.68e-10		Os1615	A2J10_01T0321500.1		MSTRG.7301.5	#N/A	#N/A	#N/A
1616	Os28327	Os42835	0.999976	8.68e-10		Os1616	A2J10_01T0321300.1		A2J10_03T0372000.1	ribosomal L18p/L5e family protein, Putative, expressed	ribosomal L18p/L5e family protein, Putative, expressed	Similar to 50S ribosomal protein L18.
1617	Os5130	Os43033	0.999976	8.69e-10		Os1617	MSTRG.27274.2		MSTRG.15996.1	#N/A	Os4bglu18 - monolignol beta-glucoside homologue, expressed	Monolignol &beta;-glucosidase, Glycosyl hydrolase family 1 (GH1) &beta;-glucosidase
1618	Os1129	Os24941	0.999976	8.71e-10		Os1618	A2J10_07T0018200.1		A2J10_10T0168700.2	protein phosphatase 2C, Putative, expressed	#N/A	Hypothetical gene.
1619	Os3626	Os29725	0.999976	8.72e-10		Os1619	MSTRG.24131.1		MSTRG.20307.2	#N/A	#N/A	#N/A
1620	Os14405	Os14639	0.999976	8.73e-10		Os1620	A2J10_06T0120300.1		A2J10_03T0089100.1	PPR repeat domain containing protein, Putative, expressed	#N/A	#N/A
1621	Os3626	Os42598	0.999976	8.75e-10		Os1621	A2J10_05T0152600.1		A2J10_04T0320800.1	OsFBX140 - F-box domain containing protein, expressed	#N/A	#N/A
1622	Os1129	Os43861	0.999976	8.75e-10		Os1622	A2J10_09T0164200.1		A2J10_06T0263400.1	Putative expressed protein	#N/A	#N/A
1623	Os3626	Os21861	0.999976	8.77e-10		Os1623	A2J10_03T0253600.1		MSTRG.11266.1	#N/A	#N/A	#N/A
1624	Os3626	Os43915	0.999976	8.78e-10		Os1624	A2J10_01T0260100.1		A2J10_07T0288000.1	nucleoside-triphosphatase, Putative, expressed	nucleoside-triphosphatase, Putative, expressed	Similar to Apyrase-like protein.
1625	Os3626	Os23453	0.999976	8.79e-10		Os1625	MSTRG.16915.8		A2J10_01T0098200.2	C2 domain containing protein, Putative, expressed	#N/A	#N/A
1626	Os5130	Os39411	0.999976	8.79e-10		Os1626	A2J10_01T0441100.1		A2J10_03T0040800.1	aminotransferase, Putative, expressed	aminotransferase, Putative, expressed	Phosphoserine aminotransferase, chloroplast precursor (EC 2.6.1.52) (PSAT).
1627	Os3626	Os22266	0.999976	8.79e-10		Os1627	MSTRG.492.1		MSTRG.19718.3	#N/A	#N/A	#N/A
1628	Os5130	Os28682	0.999976	8.79e-10		Os1628	A2J10_05T0141100.1		MSTRG.2936.1	#N/A	#N/A	#N/A
1629	Os3626	Os21809	0.999976	8.8e-10		Os1629	A2J10_01T0474600.3		MSTRG.9727.2	#N/A	#N/A	#N/A
1630	Os4820	Os26428	0.999976	8.81e-10		Os1630	A2J10_01T0343100.1		MSTRG.19685.2	#N/A	#N/A	#N/A
1631	Os5130	Os25163	0.999976	8.82e-10		Os1631	A2J10_06T0121900.1		MSTRG.15389.1	#N/A	OsWAK60 - OsWAK receptor-like protein kinase, expressed	Similar to OSIGBa0107E14.7 protein.
1632	Os5130	Os19119	0.999976	8.82e-10		Os1632	A2J10_06T0031400.1		A2J10_01T0098900.1	expressed protein	expressed protein	#N/A
1633	Os5130	Os31924	0.999976	8.83e-10		Os1633	MSTRG.15.7		MSTRG.21989.7	#N/A	#N/A	#N/A
1634	Os1129	Os18321	0.999976	8.85e-10		Os1634	MSTRG.11529.1		MSTRG.23854.1	#N/A	#N/A	#N/A
1635	Os5130	Os25575	0.999976	8.87e-10		Os1635	MSTRG.1199.1		A2J10_06T0020300.1	expressed protein	#N/A	#N/A
1636	Os3626	Os43849	0.999976	8.88e-10		Os1636	A2J10_05T0184600.1		MSTRG.10276.3	#N/A	#N/A	#N/A
1637	Os3626	Os43713	0.999976	8.88e-10		Os1637	A2J10_03T0020800.1		MSTRG.3202.7	#N/A	#N/A	#N/A
1638	Os3626	Os31821	0.999976	8.91e-10		Os1638	A2J10_11T0218900.2		A2J10_05T0104600.1	tyrosine protein kinase domain containing protein, Putative, expressed	tyrosine protein kinase domain containing protein, Putative, expressed	Similar to Protein kinase-related protein.
1639	Os1129	Os17624	0.999976	8.92e-10		Os1639	MSTRG.17738.1		A2J10_04T0289000.2	CAF1 family ribonuclease containing protein, Putative, expressed	#N/A	#N/A
1640	Os14322	Os29591	0.999976	8.93e-10		Os1640	MSTRG.8696.2		A2J10_06T0251800.1	RNA recognition motif containing protein, Putative, expressed	RNA recognition motif containing protein, Putative, expressed	Similar to Plastid-specific 30S ribosomal protein 2, chloroplast precursor (PSRP- 2).
1641	Os1129	Os44267	0.999976	8.99e-10		Os1641	A2J10_01T0357900.1		A2J10_07T0286700.1	AGC_AGC_other_RS6K_like.2 - ACG kinases include homologs to PKA, PKG and PKC, expressed	AGC_AGC_other_RS6K_like.2 - ACG kinases include homologs to PKA, PKG and PKC, expressed	Similar to Ribosomal protein S6 kinase.
1642	Os3626	Os27826	0.999976	8.99e-10		Os1642	A2J10_09T0065400.1		A2J10_01T0083100.1	Putative expressed protein	Putative expressed protein	#N/A
1643	Os5130	Os42888	0.999975	9.01e-10		Os1643	A2J10_06T0278100.1		A2J10_03T0028300.2	expressed protein	#N/A	#N/A
1644	Os3626	Os22157	0.999975	9.02e-10		Os1644	A2J10_12T0154500.1		MSTRG.14769.9	#N/A	#N/A	#N/A
1645	Os3626	Os30917	0.999975	9.02e-10		Os1645	A2J10_05T0236700.2		MSTRG.14754.5	#N/A	#N/A	#N/A
1646	Os5130	Os39821	0.999975	9.03e-10		Os1646	A2J10_03T0103200.1		MSTRG.21537.1	#N/A	peroxidase precursor, Putative, expressed	Haem peroxidase family protein.
1647	Os3626	Os43086	0.999975	9.04e-10		Os1647	MSTRG.23701.1		MSTRG.12672.4	#N/A	#N/A	#N/A
1648	Os4820	Os39652	0.999975	9.05e-10		Os1648	A2J10_06T0091900.1		A2J10_03T0310800.1	magnesium-dependent phosphatase 1, Putative, expressed	magnesium-dependent phosphatase 1, Putative, expressed	HAD-superfamily phosphatase, subfamily IIIC domain containing protein.
1649	Os3626	Os38100	0.999975	9.06e-10		Os1649	A2J10_02T0260300.2		MSTRG.13955.1	#N/A	lipoxygenase, Putative, expressed	Similar to Lipoxygenase.
1650	Os1129	Os27630	0.999975	9.08e-10		Os1650	A2J10_07T0028100.2		MSTRG.5357.11	#N/A	#N/A	#N/A
1651	Os3626	Os31207	0.999975	9.09e-10		Os1651	MSTRG.11593.1		MSTRG.10059.1	#N/A	expressed protein	Monooxygenase, FAD-binding domain containing protein.
1652	Os5130	Os21599	0.999975	9.09e-10		Os1652	MSTRG.660.4		MSTRG.23995.1	#N/A	aldehyde dehydrogenase, Putative, expressed	Aldehyde dehydrogenase domain containing protein.
1653	Os1129	Os4140	0.999975	9.1e-10		Os1653	MSTRG.26279.2		MSTRG.11438.7	#N/A	#N/A	#N/A
1654	Os3626	Os12185	0.999975	9.1e-10		Os1654	A2J10_02T0236900.1		MSTRG.25479.1	#N/A	mTERF domain containing protein, expressed	Mitochodrial transcription termination factor-related family protein.
1655	Os3626	Os37839	0.999975	9.1e-10		Os1655	A2J10_01T0233000.1		MSTRG.4980.5	#N/A	#N/A	#N/A
1656	Os5130	Os43532	0.999975	9.12e-10		Os1656	A2J10_01T0373000.1		A2J10_06T0107000.1	UDP-glucoronosyl and UDP-glucosyl transferase domain containing protein, expressed	#N/A	#N/A
1657	Os1129	Os18496	0.999975	9.12e-10		Os1657	MSTRG.431.3		MSTRG.8593.1	#N/A	#N/A	#N/A
1658	Os1129	Os28063	0.999975	9.13e-10		Os1658	A2J10_08T0184300.1		A2J10_02T0356400.1	ethylene-responsive transcription factor, Putative, expressed	ethylene-responsive transcription factor, Putative, expressed	Drought-inducible transcriptional activator, ERF transcription factor, Regulation of calmodulin-like protein, Drought tolerance, Salt tolerance
1659	Os3626	Os11823	0.999975	9.14e-10		Os1659	A2J10_10T0071200.1		A2J10_01T0469300.1	Putative ZOS1-21 - C2H2 zinc finger protein, expressed	#N/A	Hypothetical conserved gene.
1660	Os1129	Os25548	0.999975	9.14e-10		Os1660	MSTRG.1862.2		A2J10_01T0262500.1	expressed protein	#N/A	#N/A
1661	Os3626	Os42739	0.999975	9.15e-10		Os1661	MSTRG.447.1		MSTRG.22703.3	#N/A	#N/A	#N/A
1662	Os5130	Os35797	0.999975	9.19e-10		Os1662	A2J10_03T0376300.1		MSTRG.25645.2	#N/A	#N/A	#N/A
1663	Os3626	Os32196	0.999975	9.19e-10		Os1663	A2J10_04T0099500.1		MSTRG.15819.3	#N/A	#N/A	#N/A
1664	Os1129	Os38382	0.999975	9.2e-10		Os1664	A2J10_02T0312600.1		A2J10_08T0146200.1	Putative linker histone H1 and H5 family protein, expressed	#N/A	#N/A
1665	Os5130	Os11693	0.999975	9.22e-10		Os1665	A2J10_06T0302900.1		A2J10_10T0005600.2	oxidoreductase, aldo/keto reductase family protein, Putative, expressed	#N/A	#N/A
1666	Os5130	Os20123	0.999975	9.22e-10		Os1666	A2J10_03T0332700.1		MSTRG.18235.1	#N/A	#N/A	#N/A
1667	Os1129	Os32657	0.999975	9.23e-10		Os1667	A2J10_08T0157000.1		A2J10_05T0151400.1	Hypothetical protein	#N/A	#N/A
1668	Os5130	Os30742	0.999975	9.23e-10		Os1668	A2J10_05T0056600.1		MSTRG.19968.1	#N/A	#N/A	Conserved hypothetical protein.
1669	Os3626	Os43119	0.999975	9.25e-10		Os1669	MSTRG.13529.1		MSTRG.10776.1	#N/A	#N/A	#N/A
1670	Os3626	Os43922	0.999975	9.25e-10		Os1670	A2J10_09T0114800.1		A2J10_02T0293700.1	ZOS2-15 - C2H2 zinc finger protein, expressed	ZOS2-15 - C2H2 zinc finger protein, expressed	Transcription factor, Regulation of ammonium-mediated gene expression in rice roots, Regulation of ammonium-dependent root growth
1671	Os5130	Os21712	0.999975	9.26e-10		Os1671	MSTRG.26371.1		A2J10_04T0137100.2	malate synthase, glyoxysomal, Putative, expressed	#N/A	#N/A
1672	Os4820	Os16997	0.999975	9.27e-10		Os1672	A2J10_01T0351200.1		MSTRG.21056.1	#N/A	#N/A	#N/A
1673	Os3626	Os21962	0.999975	9.28e-10		Os1673	A2J10_12T0103900.1		A2J10_08T0048600.1	expressed protein	expressed protein	#N/A
1674	Os3626	Os27095	0.999975	9.29e-10		Os1674	A2J10_01T0293200.1		MSTRG.7416.1	#N/A	#N/A	#N/A
1675	Os1129	Os21576	0.999975	9.31e-10		Os1675	MSTRG.691.2		MSTRG.11543.6	#N/A	#N/A	#N/A
1676	Os3626	Os33694	0.999975	9.31e-10		Os1676	A2J10_05T0039500.1		A2J10_11T0165900.1	expressed protein	#N/A	#N/A
1677	Os14322	Os23099	0.999975	9.34e-10		Os1677	MSTRG.1733.1		A2J10_07T0002500.1	transporter family protein, Putative, expressed	#N/A	Similar to Monosaccharide transporter 3.
1678	Os1129	Os42559	0.999975	9.37e-10		Os1678	MSTRG.26306.2		MSTRG.20618.5	#N/A	#N/A	#N/A
1679	Os3626	Os31916	0.999975	9.38e-10		Os1679	A2J10_02T0389100.1		MSTRG.23672.1	#N/A	BPI/LBP family protein At3g20270 precursor, Putative, expressed	Similar to lipid binding protein.
1680	Os5130	Os33529	0.999975	9.39e-10		Os1680	A2J10_01T0203500.1		MSTRG.22476.1	#N/A	peptidase, Putative, expressed	Similar to peptidase.
1681	Os1129	Os36383	0.999975	9.39e-10		Os1681	MSTRG.17003.2		MSTRG.11747.9	#N/A	#N/A	#N/A
1682	Os3626	Os27401	0.999975	9.39e-10		Os1682	A2J10_03T0045100.1		A2J10_06T0183400.1	avr9/Cf-9 rapidly elicited protein 194, Putative, expressed	avr9/Cf-9 rapidly elicited protein 194, Putative, expressed	Similar to avr9/Cf-9 rapidly elicited protein 194.
1683	Os1129	Os43729	0.999975	9.41e-10		Os1683	MSTRG.9030.1		A2J10_06T0063200.1	CXE carboxylesterase, Putative, expressed	CXE carboxylesterase, Putative, expressed	Alpha/beta hydrolase fold-3 domain containing protein.
1684	Os5130	Os20106	0.999975	9.42e-10		Os1684	MSTRG.1497.1		A2J10_02T0345600.1	metalloendoproteinase 1 precursor, Putative, expressed	metalloendoproteinase 1 precursor, Putative, expressed	Matrix metalloproteinase, Plant development, Symplastic apoplastic transport
1685	Os3626	Os30000	0.999975	9.43e-10		Os1685	MSTRG.15448.2		MSTRG.19602.1	#N/A	CSLD2 - cellulose synthase-like family D, expressed	Similar to CSLD2 (Fragment).
1686	Os3626	Os11278	0.999975	9.43e-10		Os1686	MSTRG.5893.2		A2J10_03T0286400.1	Putative Os3bglu8 - beta-glucosidase, exo-beta-glucansase, high similarity to Os3bglu7, expressed	Os3bglu7 - beta-glucosidase, exo-beta-glucanse, expressed	Similar to Beta-glucosidase.
1687	Os5130	Os43860	0.999975	9.45e-10		Os1687	A2J10_06T0155700.1		A2J10_02T0011800.1	glutamate receptor, Putative, expressed	glutamate receptor, Putative, expressed	Glutamate receptor like protein, Mediation of ion uptake
1688	Os28327	Os31784	0.999975	9.45e-10		Os1688	MSTRG.7583.1		MSTRG.17303.6	#N/A	#N/A	Similar to Ubiquitin-activating enzyme E1.
1689	Os1129	Os40778	0.999975	9.48e-10		Os1689	MSTRG.10870.2		A2J10_07T0200400.1	lectin-like receptor kinase, Putative, expressed	lectin-like receptor kinase, Putative, expressed	Similar to Lectin receptor-type kinase.
1690	Os3626	Os22050	0.999975	9.48e-10		Os1690	MSTRG.24237.1		MSTRG.21496.3	#N/A	#N/A	#N/A
1691	Os5130	Os42855	0.999975	9.54e-10		Os1691	A2J10_03T0116800.1		A2J10_04T0247800.5	transcription factor, Putative, expressed	#N/A	#N/A
1692	Os5130	Os17268	0.999975	9.54e-10		Os1692	MSTRG.22911.3		MSTRG.23558.1	#N/A	GRAM domain containing protein, expressed	Similar to FIP1.
1693	Os3626	Os23780	0.999975	9.58e-10		Os1693	MSTRG.17069.1		MSTRG.11675.1	#N/A	sucrose transporter, putativ, expressed	Similar to Sucrose transporter.
1694	Os3626	Os37864	0.999975	9.59e-10		Os1694	A2J10_05T0142300.1		A2J10_01T0416400.2	Putative expressed protein	Putative expressed protein	#N/A
1695	Os5130	Os25547	0.999975	9.63e-10		Os1695	MSTRG.16043.1		MSTRG.24841.2	#N/A	ARID/BRIGHT DNA-binding domain containing protein, expressed	#N/A
1696	Os3626	Os43541	0.999975	9.65e-10		Os1696	A2J10_07T0152400.1		A2J10_01T0208600.2	ADP-ribosylation factor, Putative, expressed	#N/A	#N/A
1697	Os1129	Os39435	0.999975	9.66e-10		Os1697	MSTRG.25238.1		MSTRG.16522.1	#N/A	#N/A	#N/A
1698	Os5130	Os22244	0.999975	9.68e-10		Os1698	MSTRG.4558.3		A2J10_02T0239200.1	leucine rich repeat containing protein, expressed	leucine rich repeat containing protein, expressed	Leucine-rich repeat, typical subtype containing protein.
1699	Os3626	Os43059	0.999975	9.71e-10		Os1699	A2J10_03T0332800.1		A2J10_01T0291300.2	expressed protein	#N/A	#N/A
1700	Os3626	Os27864	0.999975	9.75e-10		Os1700	MSTRG.14013.1		MSTRG.17748.2	#N/A	#N/A	#N/A
1701	Os3626	Os26573	0.999974	9.75e-10		Os1701	MSTRG.25428.1		A2J10_04T0246600.1	Conserved hypothetical protein	#N/A	#N/A
1702	Os3626	Os38798	0.999974	9.76e-10		Os1702	MSTRG.14814.3		A2J10_01T0246700.2	pleiotropic drug resistance protein, Putative, expressed	#N/A	#N/A
1703	Os28327	Os28717	0.999974	9.77e-10		Os1703	A2J10_09T0058300.1		MSTRG.25885.1	#N/A	expressed protein	Phospholipase A2, active site domain containing protein.
1704	Os3626	Os43742	0.999974	9.78e-10		Os1704	A2J10_02T0419700.1		MSTRG.8234.2	#N/A	#N/A	#N/A
1705	Os5130	Os42882	0.999974	9.8e-10		Os1705	A2J10_01T0331100.1		A2J10_01T0323900.1	expressed protein	expressed protein	Conserved hypothetical protein.
1706	Os3626	Os40763	0.999974	9.82e-10		Os1706	A2J10_03T0366000.1		MSTRG.3377.4	#N/A	#N/A	#N/A
1707	Os1129	Os36556	0.999974	9.86e-10		Os1707	A2J10_02T0010700.2		A2J10_05T0223700.1	plant-specific domain TIGR01615 family protein, expressed	#N/A	#N/A
1708	Os28327	Os43943	0.999974	9.87e-10		Os1708	MSTRG.9665.1		A2J10_10T0103000.5	pectinesterase, Putative, expressed	#N/A	#N/A
1709	Os1129	Os31651	0.999974	9.87e-10		Os1709	A2J10_08T0185000.1		A2J10_03T0118700.1	WRKY55, expressed	#N/A	#N/A
1710	Os5130	Os38789	0.999974	9.88e-10		Os1710	MSTRG.17154.4		A2J10_10T0180400.2	pentatricopeptide, Putative, expressed	#N/A	#N/A
1711	Os3626	Os37955	0.999974	9.89e-10		Os1711	A2J10_12T0094400.1		A2J10_09T0054400.2	Conserved hypothetical protein	Conserved hypothetical protein	#N/A
1712	Os5130	Os43529	0.999974	9.9e-10		Os1712	MSTRG.7926.5		A2J10_07T0294800.1	thiamine pyrophosphate enzyme, C-terminal TPP binding domain containing protein, expressed	thiamine pyrophosphate enzyme, C-terminal TPP binding domain containing protein, expressed	Pyruvate decarboxylase 2, Pyruvate decarboxylase &alpha;-subunit
1713	Os3626	Os38826	0.999974	9.91e-10		Os1713	MSTRG.26388.2		A2J10_07T0281500.1	AAA-type ATPase family protein, Putative, expressed	#N/A	#N/A
1714	Os3626	Os25440	0.999974	9.93e-10		Os1714	A2J10_07T0225800.1		MSTRG.12498.1	#N/A	peptide transporter PTR3-A, Putative, expressed	TGF-beta receptor, type I/II extracellular region family protein.
1715	Os1129	Os23760	0.999974	9.94e-10		Os1715	A2J10_11T0066000.1		MSTRG.3532.1	#N/A	#N/A	#N/A
1716	Os28327	Os31716	0.999974	9.96e-10		Os1716	MSTRG.12833.2		A2J10_10T0055500.1	OsGrx_C2.1 - glutaredoxin subgroup I, expressed	OsGrx_C2.1 - glutaredoxin subgroup I, expressed	Glutaredoxin (Grx) family protein, Arsenic (As) stress response, Drought tolerance
1717	Os5130	Os16298	0.999974	9.96e-10		Os1717	MSTRG.14371.1		MSTRG.26896.1	#N/A	#N/A	#N/A
1718	Os5130	Os31994	0.999974	9.96e-10		Os1718	A2J10_03T0385700.1		MSTRG.9980.1	#N/A	expressed protein	Conserved hypothetical protein.
1719	Os5130	Os41123	0.999974	9.96e-10		Os1719	A2J10_03T0149700.1		A2J10_08T0175100.1	gibberellin receptor GID1L2, Putative, expressed	gibberellin receptor GID1L2, Putative, expressed	Alpha/beta hydrolase fold-3 domain containing protein.
1720	Os1129	Os38960	0.999974	9.97e-10		Os1720	A2J10_11T0007800.1		A2J10_11T0126100.5	cytochrome P450, Putative, expressed	#N/A	#N/A
1721	Os1129	Os21583	0.999974	9.98e-10		Os1721	MSTRG.15979.1		A2J10_10T0074500.2	alpha-1,2-fucosidase, Putative, expressed	alpha-1,2-fucosidase, Putative, expressed	Similar to Alpha-1,2-fucosidase.
1722	Os5130	Os43727	0.999974	9.99e-10		Os1722	A2J10_03T0384700.2		A2J10_02T0126100.4	AGC_PKA/PKG_like.1 - ACG kinases include homologs to PKA, PKG and PKC, expressed	#N/A	#N/A
1723	Os1129	Os43756	0.999974	1.01e-09		Os1723	A2J10_06T0165100.1		MSTRG.25613.2	#N/A	#N/A	#N/A
1724	Os3626	Os35155	0.999974	1.01e-09		Os1724	MSTRG.26333.1		A2J10_02T0078700.1	coatomer subunit beta, Putative, expressed	#N/A	#N/A
1725	Os3626	Os10786	0.999974	1.01e-09		Os1725	MSTRG.5770.4		MSTRG.13621.1	#N/A	#N/A	#N/A
1726	Os1129	Os18641	0.999974	1.01e-09		Os1726	A2J10_07T0040400.1		MSTRG.24243.1	#N/A	#N/A	#N/A
1727	Os28327	Os43867	0.999974	1.01e-09		Os1727	MSTRG.24538.1		A2J10_07T0205100.1	STE_PAK_Ste20_Slob_Wnk.5 - STE kinases include homologs to sterile 7, sterile 11 and sterile 20 from yeast,expressed	STE_PAK_Ste20_Slob_Wnk.5 - STE kinases include homologs to sterile 7, sterile 11 and sterile 20 from yeast,expressed	Similar to MAP kinase-like protein.
1728	Os1129	Os42139	0.999974	1.02e-09		Os1728	MSTRG.16734.1		MSTRG.16498.1	#N/A	GRAS family transcription factor domain containing protein, expressed	GRAS transcription factor, Drought stress response
1729	Os5130	Os42741	0.999974	1.02e-09		Os1729	A2J10_03T0019200.1		A2J10_07T0018300.1	receptor like protein kinase, Putative, expressed	receptor like protein kinase, Putative, expressed	Hypothetical protein.
1730	Os3626	Os39433	0.999974	1.02e-09		Os1730	MSTRG.18603.1		A2J10_05T0111900.1	expressed protein	#N/A	#N/A
1731	Os3626	Os37290	0.999974	1.02e-09		Os1731	A2J10_01T0263300.1		MSTRG.6325.1	#N/A	ATP binding protein, Putative, expressed	Resistance to Rice stripe virus (RSV), Protection of plant growth from heat stress, (Nipponbare: RSV-susceptible)
1732	Os5130	Os21711	0.999974	1.02e-09		Os1732	A2J10_02T0104300.1		MSTRG.22416.2	#N/A	#N/A	#N/A
1733	Os3626	Os18337	0.999974	1.02e-09		Os1733	A2J10_04T0134800.1		A2J10_10T0026200.1	peptidyl-prolyl cis-trans isomerase, Putative, expressed	peptidyl-prolyl cis-trans isomerase, Putative, expressed	Similar to Cyclophilin Dicyp-2.
1734	Os5130	Os5922	0.999974	1.02e-09		Os1734	MSTRG.10314.1		MSTRG.11444.2	#N/A	#N/A	#N/A
1735	Os5130	Os30871	0.999974	1.03e-09		Os1735	A2J10_04T0062400.1		A2J10_10T0095600.3	Ser/Thr protein phosphatase family protein, Putative, expressed	#N/A	#N/A
1736	Os1129	Os24662	0.999974	1.03e-09		Os1736	A2J10_03T0124000.1		MSTRG.19385.1	#N/A	Conserved hypothetical protein	Protein of unknown function DUF561 family protein.
1737	Os1129	Os44021	0.999974	1.03e-09		Os1737	A2J10_09T0110100.1		A2J10_03T0037300.1	Putative MT-A70 domain containing protein, expressed	#N/A	#N/A
1738	Os3626	Os43777	0.999974	1.03e-09		Os1738	A2J10_08T0204100.1		A2J10_11T0047400.1	transferase family protein, Putative, expressed	transferase family domain containing protein, expressed	Transferase family protein.
1739	Os1129	Os1904	0.999974	1.03e-09		Os1739	MSTRG.15612.3		MSTRG.8716.4	#N/A	#N/A	#N/A
1740	Os1129	Os43387	0.999974	1.04e-09		Os1740	A2J10_01T0146200.1		MSTRG.5760.14	#N/A	#N/A	#N/A
1741	Os3626	Os13599	0.999974	1.04e-09		Os1741	MSTRG.12452.2		MSTRG.10109.1	#N/A	terpene synthase, Putative, expressed	Diterpene cyclase, Ent-cassa-12,15-diene synthase, Phytocassane phytoalexins biosynthesis
1742	Os1129	Os37294	0.999974	1.04e-09		Os1742	A2J10_10T0126400.1		A2J10_03T0362400.1	NAC domain-containing protein 67, Putative, expressed	NAC domain-containing protein 67, Putative, expressed	NAC-domain transcription factor, Response to infection by M. grisea, MeJA-mediated signaling pathway, Drought and salinitytolerance
1743	Os5130	Os39474	0.999974	1.04e-09		Os1743	A2J10_01T0119000.1		A2J10_01T0414800.1	ZOS1-14 - C2H2 zinc finger protein, expressed	ZOS1-14 - C2H2 zinc finger protein, expressed	Zinc finger, C2H2-like domain containing protein.
1744	Os3626	Os25612	0.999974	1.04e-09		Os1744	MSTRG.5738.1		A2J10_02T0371800.1	Putative zinc finger, C3HC4 type domain containing protein, expressed	#N/A	#N/A
1745	Os5130	Os28610	0.999974	1.05e-09		Os1745	A2J10_02T0121500.2		MSTRG.23179.5	#N/A	#N/A	#N/A
1746	Os3626	Os42762	0.999974	1.05e-09		Os1746	A2J10_09T0158200.1		A2J10_05T0264500.1	protein kinase domain containing protein, expressed	#N/A	#N/A
1747	Os3626	Os17624	0.999974	1.05e-09		Os1747	MSTRG.15488.1		A2J10_03T0126400.1	peptide transporter PTR3-A, Putative, expressed	#N/A	#N/A
1748	Os3626	Os22158	0.999974	1.05e-09		Os1748	A2J10_09T0031300.1		A2J10_04T0242600.6	ABC transporter family protein, Putative, expressed	#N/A	#N/A
1749	Os5130	Os42540	0.999973	1.06e-09		Os1749	A2J10_06T0246700.1		A2J10_01T0393600.1	expressed protein	expressed protein	Conserved hypothetical protein.
1750	Os5130	Os43823	0.999973	1.06e-09		Os1750	MSTRG.23224.1		A2J10_10T0105600.1	Conserved hypothetical protein	#N/A	Hypothetical protein.
1751	Os5130	Os10433	0.999973	1.06e-09		Os1751	A2J10_06T0159800.1		A2J10_10T0176600.1	Conserved hypothetical protein	#N/A	#N/A
1752	Os3626	Os12391	0.999973	1.06e-09		Os1752	MSTRG.26716.6		A2J10_01T0328200.1	plant-specific domain TIGR01615 family protein, expressed	#N/A	#N/A
1753	Os3626	Os43562	0.999973	1.07e-09		Os1753	MSTRG.20167.2		A2J10_01T0289000.1	PAP/25A associated domain containing protein, Putative, expressed	PAP/25A associated domain containing protein, Putative, expressed	Hypothetical conserved gene.
1754	Os1129	Os32501	0.999973	1.07e-09		Os1754	A2J10_04T0236900.1		MSTRG.2801.1	#N/A	insulin-degrading enzyme, Putative, expressed	Peptidase M16, core domain containing protein.
1755	Os1129	Os25115	0.999973	1.07e-09		Os1755	MSTRG.10063.1		A2J10_10T0051900.1	TAK14, Putative, expressed	#N/A	#N/A
1756	Os5130	Os32164	0.999973	1.07e-09		Os1756	A2J10_02T0244100.1		MSTRG.15606.2	#N/A	#N/A	#N/A
1757	Os3626	Os43718	0.999973	1.07e-09		Os1757	MSTRG.25508.1		MSTRG.20301.4	#N/A	#N/A	#N/A
1758	Os5130	Os28279	0.999973	1.08e-09		Os1758	MSTRG.4481.1		A2J10_02T0023800.1	expressed protein	#N/A	#N/A
1759	Os3626	Os42553	0.999973	1.08e-09		Os1759	A2J10_03T0206800.1		MSTRG.15962.5	#N/A	photosystem-II repair protein, Putative, expressed	#N/A
1760	Os1129	Os29168	0.999973	1.08e-09		Os1760	A2J10_03T0383700.1		MSTRG.741.1	#N/A	expressed protein	Conserved hypothetical protein.
1761	Os3626	Os31628	0.999973	1.08e-09		Os1761	MSTRG.21637.2		MSTRG.11663.2	#N/A	#N/A	#N/A
1762	Os3626	Os8220	0.999973	1.08e-09		Os1762	A2J10_04T0223600.1		A2J10_01T0329700.1	ribosomal protein L13, Putative, expressed	#N/A	#N/A
1763	Os5130	Os39011	0.999973	1.09e-09		Os1763	MSTRG.10306.1		A2J10_03T0203000.1	spotted leaf 11, Putative, expressed	spotted leaf 11, Putative, expressed	Similar to exodeoxyribonuclease V.
1764	Os1129	Os38676	0.999973	1.09e-09		Os1764	A2J10_02T0119500.3		MSTRG.14751.1	#N/A	amine oxidase, flavin-containing, domain containing protein, expressed	Similar to carotenoid isomerase 1.
1765	Os3626	Os35373	0.999973	1.09e-09		Os1765	MSTRG.21962.1		A2J10_07T0132700.2	calmodulin binding heat shock protein, Putative, expressed	#N/A	#N/A
1766	Os5130	Os40034	0.999973	1.09e-09		Os1766	A2J10_02T0308900.1		MSTRG.16995.2	#N/A	digalactosyldiacylglycerol synthase, chloroplast precursor, Putative, expressed	Similar to Digalactosyldiacylglycerol synthase 2.
1767	Os1129	Os43847	0.999973	1.1e-09		Os1767	A2J10_08T0214600.1		A2J10_07T0178200.3	Conserved hypothetical protein	#N/A	#N/A
1768	Os5130	Os35800	0.999973	1.1e-09		Os1768	MSTRG.1866.2		A2J10_09T0213100.4	C2 domain containing protein, Putative, expressed	#N/A	#N/A
1769	Os3626	Os43061	0.999973	1.1e-09		Os1769	MSTRG.5213.1		A2J10_02T0007300.2	expressed protein	#N/A	#N/A
1770	Os1129	Os38717	0.999973	1.1e-09		Os1770	A2J10_11T0178700.1		MSTRG.1079.3	#N/A	#N/A	#N/A
1771	Os5130	Os25741	0.999973	1.1e-09		Os1771	A2J10_12T0019800.1		MSTRG.16378.3	#N/A	#N/A	#N/A
1772	Os3626	Os42862	0.999973	1.11e-09		Os1772	MSTRG.8628.5		A2J10_03T0319200.3	periplasmic beta-glucosidase precursor, Putative, expressed	#N/A	#N/A
1773	Os14322	Os29367	0.999973	1.11e-09		Os1773	A2J10_12T0130000.1		MSTRG.23063.7	#N/A	TKL_IRAK_DUF26-lc.18 - DUF26 kinases have homology to DUF26 containing loci, expressed	#N/A
1774	Os1129	Os44219	0.999973	1.11e-09		Os1774	MSTRG.22973.1		A2J10_01T0015500.1	expressed protein	expressed protein	#N/A
1775	Os14322	Os42484	0.999973	1.11e-09		Os1775	A2J10_08T0128600.1		A2J10_12T0009100.1	ubiquitin-like protein 5, Putative, expressed	#N/A	#N/A
1776	Os3626	Os16298	0.999973	1.11e-09		Os1776	MSTRG.25375.3		MSTRG.87.1	#N/A	#N/A	#N/A
1777	Os5130	Os43956	0.999973	1.11e-09		Os1777	A2J10_07T0054000.1		MSTRG.9215.1	#N/A	peroxidase precursor, Putative, expressed	Peroxidase P7 (EC 1.11.1.7) (TP7).
1778	Os3626	Os22174	0.999973	1.12e-09		Os1778	A2J10_01T0329900.1		MSTRG.12010.2	#N/A	expressed protein	Conserved hypothetical protein.
1779	Os3626	Os39087	0.999973	1.12e-09		Os1779	MSTRG.18799.3		A2J10_03T0284200.1	lipozygenase protein, Putative, expressed	lipozygenase protein, Putative, expressed	Lipoxygenase-3, Generation of stale flavor
1780	Os3626	Os42796	0.999973	1.12e-09		Os1780	MSTRG.1517.1		A2J10_10T0130400.1	DUF584 domain containing protein, Putative, expressed	DUF584 domain containing protein, Putative, expressed	Hypothetical conserved gene.
1781	Os3626	Os43837	0.999973	1.12e-09		Os1781	MSTRG.18777.1		MSTRG.9646.4	#N/A	#N/A	#N/A
1782	Os3626	Os43809	0.999973	1.12e-09		Os1782	MSTRG.4561.2		A2J10_12T0120700.1	expressed protein	#N/A	#N/A
1783	Os5130	Os21124	0.999973	1.12e-09		Os1783	A2J10_10T0181000.1		A2J10_08T0188400.2	uncharacterized glycosyltransferase, Putative, expressed	#N/A	#N/A
1784	Os1129	Os25007	0.999973	1.12e-09		Os1784	A2J10_01T0293900.1		MSTRG.19396.1	#N/A	GTP-binding protein, Putative, expressed	Similar to GTP-binding protein era.
1785	Os3626	Os37915	0.999973	1.12e-09		Os1785	A2J10_01T0006700.1		MSTRG.12585.1	#N/A	leucoanthocyanidin dioxygenase, Putative, expressed	Similar to Leucoanthocyanidin dioxygenase-like protein.
1786	Os5130	Os28491	0.999973	1.12e-09		Os1786	A2J10_01T0256600.1		A2J10_09T0038500.3	ubiquitin-conjugating enzyme E2 W, Putative, expressed	#N/A	#N/A
1787	Os5130	Os43694	0.999973	1.12e-09		Os1787	MSTRG.22022.2		MSTRG.12710.3	#N/A	#N/A	#N/A
1788	Os3626	Os9229	0.999973	1.13e-09		Os1788	A2J10_04T0008200.1		MSTRG.7739.3	#N/A	#N/A	#N/A
1789	Os1129	Os25834	0.999973	1.13e-09		Os1789	A2J10_01T0007400.1		A2J10_03T0169400.2	nucleoside-triphosphatase, Putative, expressed	#N/A	#N/A
1790	Os3626	Os25548	0.999973	1.13e-09		Os1790	A2J10_01T0229900.1		MSTRG.6901.7	#N/A	#N/A	#N/A
1791	Os1129	Os39938	0.999972	1.13e-09		Os1791	MSTRG.157.3		A2J10_01T0434600.1	polypyrimidine tract-binding protein, Putative, expressed	Yip1 domain containing protein, expressed	Yip1 domain containing protein.
1792	Os3626	Os22304	0.999972	1.14e-09		Os1792	MSTRG.17688.2		A2J10_09T0212300.1	Conserved hypothetical protein	#N/A	#N/A
1793	Os5130	Os25084	0.999972	1.14e-09		Os1793	MSTRG.16823.1		A2J10_04T0224700.1	expressed protein	#N/A	#N/A
1794	Os5130	Os38697	0.999972	1.14e-09		Os1794	MSTRG.10923.2		A2J10_02T0368400.2	Conserved hypothetical protein	#N/A	#N/A
1795	Os14322	Os33199	0.999972	1.14e-09		Os1795	A2J10_05T0075600.1		A2J10_07T0196600.5	expressed protein	#N/A	#N/A
1796	Os4820	Os28518	0.999972	1.14e-09		Os1796	MSTRG.26959.1		MSTRG.16737.14	#N/A	#N/A	Similar to H0525G02.12 protein.
1797	Os5130	Os42519	0.999972	1.14e-09		Os1797	MSTRG.27089.2		MSTRG.17785.1	#N/A	#N/A	#N/A
1798	Os5130	Os42912	0.999972	1.14e-09		Os1798	A2J10_03T0128800.1		MSTRG.8690.6	#N/A	#N/A	Conserved hypothetical protein.
1799	Os1129	Os11418	0.999972	1.14e-09		Os1799	A2J10_01T0206300.3		MSTRG.15368.3	#N/A	#N/A	#N/A
1800	Os3626	Os43555	0.999972	1.14e-09		Os1800	A2J10_05T0206700.1		A2J10_06T0045900.1	expressed protein	expressed protein	Similar to predicted protein.
1801	Os5130	Os6314	0.999972	1.15e-09		Os1801	A2J10_05T0268500.1		A2J10_11T0167500.1	leucine rich repeat protein, Putative, expressed	leucine rich repeat protein, Putative, expressed	Leucine-rich repeat domain containing protein.
1802	Os1129	Os30254	0.999972	1.15e-09		Os1802	MSTRG.16481.4		MSTRG.12526.1	#N/A	esterase, Putative, expressed	Alpha/beta hydrolase fold-1 domain containing protein.
1803	Os5130	Os35469	0.999972	1.15e-09		Os1803	MSTRG.10986.3		MSTRG.27255.1	#N/A	#N/A	#N/A
1804	Os3626	Os18224	0.999972	1.15e-09		Os1804	A2J10_02T0213500.1		A2J10_04T0158400.1	DUF584 domain containing protein, Putative, expressed	#N/A	#N/A
1805	Os3626	Os22180	0.999972	1.15e-09		Os1805	MSTRG.9702.2		MSTRG.12347.2	#N/A	#N/A	#N/A
1806	Os3626	Os39699	0.999972	1.15e-09		Os1806	MSTRG.2080.3		MSTRG.15750.1	#N/A	expressed protein	Conserved hypothetical protein.
1807	Os3626	Os43577	0.999972	1.15e-09		Os1807	MSTRG.1621.3		A2J10_06T0208800.2	receptor-like protein kinase precursor, Putative, expressed	#N/A	#N/A
1808	Os5130	Os21116	0.999972	1.15e-09		Os1808	A2J10_02T0305200.1		A2J10_02T0031300.1	splicing factor 3B subunit 1, Putative, expressed	#N/A	#N/A
1809	Os1129	Os6361	0.999972	1.15e-09		Os1809	MSTRG.10455.1		MSTRG.8677.5	#N/A	#N/A	#N/A
1810	Os5130	Os43779	0.999972	1.16e-09		Os1810	A2J10_12T0181400.1		MSTRG.21807.3	#N/A	#N/A	#N/A
1811	Os1129	Os18747	0.999972	1.16e-09		Os1811	A2J10_01T0113500.1		MSTRG.3501.2	#N/A	#N/A	#N/A
1812	Os5130	Os39299	0.999972	1.16e-09		Os1812	MSTRG.17882.1		A2J10_04T0109500.1	expressed protein	expressed protein	Homolog of Arabidopsis BIC1 (Blue-light Inhibitor of Cryptochrome 1), Control of blue light-induced leaf sheath elongation, Regulation of epidermal cell elongation
1813	Os1129	Os31014	0.999972	1.16e-09		Os1813	A2J10_12T0188900.1		A2J10_01T0093600.1	expressed protein	expressed protein	Conserved hypothetical protein.
1814	Os3626	Os42998	0.999972	1.16e-09		Os1814	MSTRG.23027.2		MSTRG.17824.1	#N/A	#N/A	#N/A
1815	Os3626	Os19145	0.999972	1.16e-09		Os1815	A2J10_04T0320900.1		MSTRG.26600.1	#N/A	chlorophyll A-B binding protein, Putative, expressed	Similar to Type II chlorophyll a/b binding protein from photosystem I precursor.
1816	Os3626	Os8402	0.999972	1.16e-09		Os1816	A2J10_05T0266700.1		MSTRG.1913.3	#N/A	#N/A	#N/A
1817	Os3626	Os38893	0.999972	1.17e-09		Os1817	A2J10_11T0033200.1		A2J10_04T0295200.5	esterase PIR7A, Putative, expressed	glutathione S-transferase, Putative, expressed	#N/A
1818	Os3626	Os15250	0.999972	1.17e-09		Os1818	A2J10_05T0146000.1		MSTRG.9697.4	#N/A	#N/A	#N/A
1819	Os5130	Os21809	0.999972	1.17e-09		Os1819	A2J10_08T0214000.1		A2J10_04T0187000.2	heat stress transcription factor, Putative, expressed	#N/A	#N/A
1820	Os3626	Os38080	0.999972	1.17e-09		Os1820	A2J10_08T0194200.1		A2J10_01T0078100.1	cytochrome P450, Putative, expressed	#N/A	#N/A
1821	Os1129	Os28510	0.999972	1.17e-09		Os1821	A2J10_07T0004600.1		MSTRG.20744.5	#N/A	#N/A	#N/A
1822	Os1129	Os41145	0.999972	1.18e-09		Os1822	A2J10_07T0278900.2		MSTRG.7265.3	#N/A	#N/A	#N/A
1823	Os5130	Os25424	0.999972	1.18e-09		Os1823	MSTRG.23417.1		A2J10_06T0260500.3	OsFtsH2 FtsH protease, homologue of AtFtsH2/8, expressed	#N/A	#N/A
1824	Os3626	Os14253	0.999972	1.18e-09		Os1824	A2J10_02T0060000.2		A2J10_04T0113000.1	E2F family transcription factor protein, Putative, expressed	E2F family transcription factor protein, Putative, expressed	Similar to Transcription factor E2F1 (E2F-1) (Fragment).
1825	Os1989	Os42000	0.999972	1.18e-09		Os1825	A2J10_07T0287100.1		A2J10_08T0089400.1	OsClp10 - Putative Clp protease homologue, expressed	#N/A	#N/A
1826	Os5130	Os42535	0.999972	1.18e-09		Os1826	MSTRG.22556.5		A2J10_01T0326400.1	Conserved hypothetical protein	#N/A	#N/A
1827	Os5130	Os43622	0.999972	1.18e-09		Os1827	A2J10_10T0185500.1		A2J10_04T0091300.1	Conserved hypothetical protein	#N/A	#N/A
1828	Os1129	Os43875	0.999972	1.18e-09		Os1828	A2J10_03T0302200.1		MSTRG.14110.6	#N/A	#N/A	#N/A
1829	Os1129	Os4010	0.999972	1.19e-09		Os1829	A2J10_06T0256700.1		A2J10_08T0153300.8	OsTIL-2 Temperature-induced lipocalin-2, expressed	OsTIL-2 Temperature-induced lipocalin-2, expressed	Similar to Temperature stress-induced lipocalin.
1830	Os5130	Os28886	0.999972	1.19e-09		Os1830	A2J10_08T0084000.1		A2J10_03T0349900.1	indole-3-glycerol phosphate lyase, chloroplast precursor, Putative, expressed	#N/A	#N/A
1831	Os1129	Os38275	0.999972	1.19e-09		Os1831	A2J10_06T0003400.1		A2J10_01T0357700.1	decarboxylase, Putative, expressed	decarboxylase, Putative, expressed	Aromatic L-amino acid decarboxylase (AADC), Conversion of tyrosine into tyramine
1832	Os5130	Os42871	0.999972	1.19e-09		Os1832	MSTRG.5304.1		A2J10_05T0118800.1	universal stress protein domain containing protein, Putative, expressed	universal stress protein domain containing protein, Putative, expressed	#N/A
1833	Os5130	Os39754	0.999972	1.19e-09		Os1833	A2J10_05T0106200.1		MSTRG.5441.1	#N/A	#N/A	#N/A
1834	Os5130	Os38757	0.999972	1.19e-09		Os1834	MSTRG.11749.3		MSTRG.19233.1	#N/A	#N/A	#N/A
1835	Os1129	Os16298	0.999972	1.19e-09		Os1835	MSTRG.22774.1		MSTRG.13017.3	#N/A	#N/A	#N/A
1836	Os1129	Os22540	0.999972	1.19e-09		Os1836	A2J10_05T0167000.1		A2J10_12T0180100.1	expressed protein	expressed protein	Conserved hypothetical protein.
1837	Os3626	Os38817	0.999972	1.19e-09		Os1837	A2J10_01T0406800.2		MSTRG.579.2	#N/A	#N/A	#N/A
1838	Os5130	Os17718	0.999972	1.19e-09		Os1838	MSTRG.14670.2		MSTRG.13690.1	#N/A	#N/A	#N/A
1839	Os1129	Os38767	0.999972	1.19e-09		Os1839	MSTRG.10159.1		MSTRG.12738.1	#N/A	MYB family transcription factor, Putative, expressed	R2R3-type MYB transcription factor, "Salt, cold and dehydration tolerance"
1840	Os3626	Os20884	0.999972	1.19e-09		Os1840	A2J10_07T0283500.1		MSTRG.24790.2	#N/A	#N/A	#N/A
1841	Os5130	Os42856	0.999972	1.2e-09		Os1841	A2J10_03T0309000.1		MSTRG.17433.2	#N/A	#N/A	#N/A
1842	Os3626	Os25234	0.999972	1.2e-09		Os1842	A2J10_09T0093400.1		A2J10_01T0491700.1	NAM, Putative, expressed	NAM, Putative, expressed	No apical meristem (NAM) protein domain containing protein.
1843	Os3626	Os18232	0.999972	1.2e-09		Os1843	A2J10_11T0064700.1		A2J10_03T0207700.1	Conserved hypothetical protein	#N/A	#N/A
1844	Os1129	Os40498	0.999972	1.2e-09		Os1844	MSTRG.21116.1		A2J10_01T0313100.2	serine acetyltransferase protein, Putative, expressed	#N/A	#N/A
1845	Os1129	Os37398	0.999972	1.2e-09		Os1845	MSTRG.20268.2		MSTRG.270.3	#N/A	#N/A	#N/A
1846	Os5130	Os39748	0.999972	1.2e-09		Os1846	A2J10_03T0191500.1		A2J10_02T0407000.8	HEAT repeat family protein, Putative, expressed	HEAT repeat family protein, Putative, expressed	Armadillo-type fold domain containing protein.
1847	Os3626	Os40381	0.999972	1.2e-09		Os1847	A2J10_03T0331000.1		A2J10_06T0048200.1	STE_MEK_ste7_MAP2K.5 - STE kinases include homologs to sterile 7, sterile 11 and sterile 20 from yeast,expressed	STE_MEK_ste7_MAP2K.5 - STE kinases include homologs to sterile 7, sterile 11 and sterile 20 from yeast,expressed	Mitogen-activated protein kinase kinase 4, Defense response, Cell proliferation, Grain growth
1848	Os3626	Os28682	0.999972	1.2e-09		Os1848	MSTRG.16521.1		MSTRG.9099.1	#N/A	#N/A	#N/A
1849	Os3626	Os21020	0.999972	1.2e-09		Os1849	A2J10_03T0229200.1		MSTRG.20041.2	#N/A	#N/A	#N/A
1850	Os1129	Os28573	0.999972	1.21e-09		Os1850	A2J10_02T0185400.3		MSTRG.22552.1	#N/A	#N/A	#N/A
1851	Os3626	Os12003	0.999972	1.21e-09		Os1851	A2J10_09T0039600.1		MSTRG.8081.3	#N/A	#N/A	#N/A
1852	Os5130	Os33742	0.999972	1.21e-09		Os1852	A2J10_08T0070200.1		MSTRG.15206.3	#N/A	#N/A	#N/A
1853	Os3626	Os30362	0.999972	1.21e-09		Os1853	A2J10_05T0175300.1		A2J10_04T0188400.1	glycosyl hydrolase, Putative, expressed	#N/A	#N/A
1854	Os3626	Os42528	0.999972	1.21e-09		Os1854	MSTRG.1668.1		A2J10_05T0165500.1	phenylalanine ammonia-lyase, Putative, expressed	phenylalanine ammonia-lyase, Putative, expressed	Phenylalanine ammonia-lyase (EC 4.3.1.5).
1855	Os5130	Os22118	0.999972	1.21e-09		Os1855	A2J10_03T0087300.1		A2J10_08T0193000.1	aminotransferase, Putative, expressed	#N/A	#N/A
1856	Os3626	Os17107	0.999972	1.21e-09		Os1856	MSTRG.14663.4		A2J10_01T0236800.1	Putative expressed protein	expressed protein	Leucine rich repeat, N-terminal domain containing protein.
1857	Os5130	Os25323	0.999972	1.22e-09		Os1857	A2J10_03T0077200.1		MSTRG.19903.7	#N/A	#N/A	#N/A
1858	Os4820	Os30350	0.999972	1.22e-09		Os1858	MSTRG.5012.1		A2J10_02T0336000.1	zinc finger, C3HC4 type domain containing protein, expressed	zinc finger, C3HC4 type domain containing protein, expressed	Zinc finger, RING/FYVE/PHD-type domain containing protein.
1859	Os28327	Os43750	0.999972	1.22e-09		Os1859	MSTRG.14058.2		MSTRG.20950.1	#N/A	inositol oxygenase, Putative, expressed	Myo-inositol oxygenase, Drought stress tolerance
1860	Os1129	Os17523	0.999971	1.22e-09		Os1860	MSTRG.5276.1		MSTRG.13267.3	#N/A	#N/A	#N/A
1861	Os3626	Os30386	0.999971	1.22e-09		Os1861	A2J10_02T0194900.1		MSTRG.17991.2	#N/A	#N/A	#N/A
1862	Os1129	Os28211	0.999971	1.23e-09		Os1862	MSTRG.19218.5		MSTRG.8742.16	#N/A	#N/A	#N/A
1863	Os5130	Os25258	0.999971	1.23e-09		Os1863	A2J10_09T0102500.1		MSTRG.13077.4	#N/A	expressed protein	#N/A
1864	Os1129	Os38180	0.999971	1.23e-09		Os1864	MSTRG.17863.1		A2J10_02T0309600.1	transposon protein, Putative, unclassified, expressed	transposon protein, Putative, unclassified, expressed	Similar to transposon protein.
1865	Os3626	Os43754	0.999971	1.23e-09		Os1865	MSTRG.26269.1		MSTRG.16156.1	#N/A	DUF584 domain containing protein, Putative, expressed	A member of S40 gene family, Leaf senescence
1866	Os3626	Os34484	0.999971	1.24e-09		Os1866	A2J10_02T0044900.1		A2J10_09T0078900.1	senescence-induced receptor-like serine/threonine-protein kinase precursor, Putative, expressed	#N/A	Carbohydrate-binding malectin-like domain-containing protein, Drought tolerance, NADPH oxidase-mediated ROS production
1867	Os3626	Os6097	0.999971	1.24e-09		Os1867	MSTRG.162.1		A2J10_12T0112800.1	nodulin, Putative, expressed	nodulin family protein, Putative, expressed	Similar to nitrate and chloride transporter.
1868	Os3626	Os42811	0.999971	1.24e-09		Os1868	MSTRG.16133.1		A2J10_05T0244800.3	phosphatidylserine synthase, Putative, expressed	#N/A	#N/A
1869	Os3626	Os17944	0.999971	1.24e-09		Os1869	A2J10_03T0285100.1		MSTRG.26103.2	#N/A	#N/A	#N/A
1870	Os3626	Os43120	0.999971	1.24e-09		Os1870	MSTRG.19470.1		MSTRG.19140.6	#N/A	#N/A	#N/A
1871	Os3626	Os32086	0.999971	1.24e-09		Os1871	A2J10_11T0025200.1		A2J10_10T0179700.4	Conserved hypothetical protein	#N/A	#N/A
1872	Os1129	Os41003	0.999971	1.25e-09		Os1872	A2J10_01T0041000.1		MSTRG.19980.3	#N/A	#N/A	#N/A
1873	Os5130	Os33697	0.999971	1.25e-09		Os1873	A2J10_07T0156400.3		A2J10_07T0267500.1	glycosyltransferase, Putative, expressed	#N/A	#N/A
1874	Os3626	Os40206	0.999971	1.25e-09		Os1874	MSTRG.26452.1		A2J10_10T0025600.1	vesicle-associated membrane protein, Putative, expressed	#N/A	#N/A
1875	Os5130	Os40520	0.999971	1.25e-09		Os1875	A2J10_03T0010100.1		MSTRG.20389.3	#N/A	#N/A	#N/A
1876	Os3626	Os41098	0.999971	1.25e-09		Os1876	A2J10_02T0240800.1		A2J10_06T0206900.1	expressed protein	receptor-like protein kinase precursor, Putative, expressed	Hypothetical conserved gene.
1877	Os5130	Os17346	0.999971	1.25e-09		Os1877	MSTRG.27178.3		MSTRG.14320.7	#N/A	#N/A	#N/A
1878	Os3626	Os42525	0.999971	1.26e-09		Os1878	A2J10_03T0168100.1		A2J10_01T0059300.1	cytochrome P450, Putative, expressed	cytochrome P450, Putative, expressed	Cytochrome P450 family protein.
1879	Os1129	Os31019	0.999971	1.26e-09		Os1879	MSTRG.12075.1		MSTRG.3940.4	#N/A	#N/A	#N/A
1880	Os3626	Os16378	0.999971	1.26e-09		Os1880	A2J10_01T0022000.1		A2J10_01T0488300.4	aspartokinase 3, chloroplast precursor, Putative, expressed	#N/A	#N/A
1881	Os5130	Os31730	0.999971	1.26e-09		Os1881	A2J10_02T0016000.1		A2J10_02T0324700.1	Conserved hypothetical protein	#N/A	Similar to H0721B11.1 protein.
1882	Os5130	Os18220	0.999971	1.26e-09		Os1882	A2J10_03T0372900.1		A2J10_07T0292000.2	importin subunit alpha-1b, Putative, expressed	#N/A	#N/A
1883	Os1129	Os38084	0.999971	1.26e-09		Os1883	MSTRG.20068.1		A2J10_11T0060200.1	Putative expressed protein	expressed protein	NB-ARC domain containing protein.
1884	Os3626	Os42439	0.999971	1.26e-09		Os1884	A2J10_12T0027900.1		MSTRG.7695.1	#N/A	exo70 exocyst complex subunit family protein, Putative, expressed	Exo70 exocyst complex subunit family protein.
1885	Os1129	Os23129	0.999971	1.27e-09		Os1885	A2J10_05T0163700.1		MSTRG.2950.2	#N/A	#N/A	#N/A
1886	Os3626	Os21953	0.999971	1.27e-09		Os1886	MSTRG.8930.1		A2J10_01T0290000.1	expressed protein	#N/A	#N/A
1887	Os1129	Os17171	0.999971	1.27e-09		Os1887	A2J10_09T0145500.1		A2J10_01T0280300.1	C2 domain containing protein, Putative, expressed	C2 domain containing protein, Putative, expressed	C2 calcium-dependent membrane targeting domain containing protein.
1888	Os3626	Os12672	0.999971	1.27e-09		Os1888	A2J10_12T0144400.1		A2J10_02T0246200.1	expressed protein	expressed protein	Protein kinase, core domain containing protein.
1889	Os3626	Os28683	0.999971	1.27e-09		Os1889	A2J10_03T0167600.1		MSTRG.24203.1	#N/A	WD domain, G-beta repeat domain containing protein, expressed	WD40 Polycomb protein of the PRC2 complex, Regulation of vegetative and reproductive development
1890	Os1129	Os33709	0.999971	1.27e-09		Os1890	MSTRG.2384.1		MSTRG.12220.2	#N/A	#N/A	#N/A
1891	Os3626	Os39778	0.999971	1.27e-09		Os1891	MSTRG.3006.1		A2J10_10T0062800.1	Conserved hypothetical protein	#N/A	#N/A
1892	Os3626	Os39152	0.999971	1.28e-09		Os1892	A2J10_06T0273100.1		MSTRG.14688.2	#N/A	#N/A	#N/A
1893	Os3626	Os17695	0.999971	1.28e-09		Os1893	MSTRG.26117.1		MSTRG.8768.1	#N/A	#N/A	#N/A
1894	Os5130	Os25492	0.999971	1.28e-09		Os1894	A2J10_02T0267900.1		MSTRG.19635.2	#N/A	#N/A	#N/A
1895	Os5130	Os34713	0.999971	1.28e-09		Os1895	A2J10_05T0230200.1		A2J10_02T0071700.1	Putative OsFBX126 - F-box domain containing protein, expressed	#N/A	#N/A
1896	Os3626	Os21828	0.999971	1.29e-09		Os1896	A2J10_09T0088400.1		MSTRG.5757.1	#N/A	Putative OsFBX411 - F-box domain containing protein, expressed	#N/A
1897	Os1129	Os25339	0.999971	1.29e-09		Os1897	MSTRG.15818.3		A2J10_05T0045800.1	expressed protein	#N/A	#N/A
1898	Os3626	Os31887	0.999971	1.29e-09		Os1898	A2J10_09T0095100.2		A2J10_01T0205800.3	rp3 protein, Putative, expressed	#N/A	Similar to Rust resistance protein rp3-1.
1899	Os3626	Os43964	0.999971	1.29e-09		Os1899	A2J10_09T0101100.1		MSTRG.19600.3	#N/A	#N/A	#N/A
1900	Os3626	Os42875	0.999971	1.29e-09		Os1900	A2J10_02T0253000.1		A2J10_08T0124900.1	pleiotropic drug resistance protein, Putative, expressed	#N/A	#N/A
1901	Os5130	Os18127	0.999971	1.29e-09		Os1901	MSTRG.1148.1		MSTRG.23039.2	#N/A	#N/A	#N/A
1902	Os5130	Os36252	0.999971	1.29e-09		Os1902	MSTRG.20638.2		A2J10_05T0103400.2	dehydrogenase, Putative, expressed	#N/A	#N/A
1903	Os1129	Os27036	0.999971	1.29e-09		Os1903	A2J10_07T0017700.1		MSTRG.17609.2	#N/A	#N/A	#N/A
1904	Os3626	Os25676	0.999971	1.29e-09		Os1904	MSTRG.8585.2		MSTRG.24781.3	#N/A	#N/A	#N/A
1905	Os3626	Os40986	0.999971	1.29e-09		Os1905	A2J10_01T0398200.2		MSTRG.24452.1	#N/A	no apical meristem protein, Putative, expressed	No apical meristem (NAM) protein domain containing protein.
1906	Os3626	Os14120	0.999971	1.3e-09		Os1906	A2J10_07T0167500.1		A2J10_05T0209800.5	cyclic nucleotide-gated ion channel 2, Putative, expressed	#N/A	#N/A
1907	Os3626	Os37711	0.999971	1.3e-09		Os1907	MSTRG.16755.1		MSTRG.12023.1	#N/A	ribosomal protein, Putative, expressed	Similar to Ribosomal Pr 117 (Fragment).
1908	Os3626	Os42602	0.999971	1.3e-09		Os1908	A2J10_05T0036400.2		A2J10_11T0196400.5	SWIB/MDM2 domain containing protein, expressed	#N/A	#N/A
1909	Os1129	Os43973	0.999971	1.3e-09		Os1909	A2J10_02T0188700.1		A2J10_07T0133900.1	Putative expressed protein	#N/A	#N/A
1910	Os5130	Os38773	0.999971	1.3e-09		Os1910	A2J10_05T0085700.1		A2J10_05T0126200.2	receptor-like protein kinase 5 precursor, Putative, expressed	#N/A	#N/A
1911	Os3626	Os13807	0.99997	1.31e-09		Os1911	MSTRG.26474.1		MSTRG.3018.4	#N/A	#N/A	#N/A
1912	Os3626	Os43737	0.99997	1.31e-09		Os1912	A2J10_06T0020700.1		A2J10_04T0133200.1	WD domain, G-beta repeat domain containing protein, expressed	WD domain, G-beta repeat domain containing protein, expressed	Hypothetical gene.
1913	Os1129	Os25380	0.99997	1.32e-09		Os1913	A2J10_02T0339700.1		MSTRG.2219.1	#N/A	#N/A	#N/A
1914	Os5130	Os42881	0.99997	1.32e-09		Os1914	MSTRG.2963.1		A2J10_06T0009900.1	acyl CoA binding protein, Putative, expressed	#N/A	#N/A
1915	Os3626	Os23456	0.99997	1.32e-09		Os1915	A2J10_12T0188500.1		A2J10_02T0401800.1	aminotransferase, classes I and II, domain containing protein, expressed	aminotransferase, classes I and II, domain containing protein, expressed	Pyridoxal phosphate-dependent transferase, major region, subdomain 1 domain containing protein.
1916	Os1129	Os39773	0.99997	1.32e-09		Os1916	A2J10_03T0082800.1		A2J10_02T0052000.1	VQ domain containing protein, Putative, expressed	VQ domain containing protein, Putative, expressed	VQ domain containing protein.
1917	Os28327	Os43764	0.99997	1.32e-09		Os1917	A2J10_08T0193200.1		MSTRG.2508.6	#N/A	#N/A	#N/A
1918	Os3626	Os29957	0.99997	1.32e-09		Os1918	A2J10_04T0210200.1		A2J10_03T0241300.1	pentatricopeptide, Putative, expressed	pentatricopeptide, Putative, expressed	Hypothetical conserved gene.
1919	Os1129	Os34142	0.99997	1.33e-09		Os1919	MSTRG.18996.1		A2J10_01T0471000.1	Conserved hypothetical protein	#N/A	#N/A
1920	Os3626	Os17516	0.99997	1.33e-09		Os1920	A2J10_02T0318000.1		A2J10_08T0059200.1	expressed protein	#N/A	Zinc finger, GRF-type domain containing protein.
1921	Os1129	Os39739	0.99997	1.33e-09		Os1921	A2J10_10T0155800.1		A2J10_12T0131800.3	guanylyl cyclase, Putative, expressed	#N/A	#N/A
1922	Os1129	Os18639	0.99997	1.33e-09		Os1922	A2J10_02T0418000.1		MSTRG.3163.4	#N/A	#N/A	#N/A
1923	Os5130	Os28411	0.99997	1.33e-09		Os1923	MSTRG.22920.3		MSTRG.22526.4	#N/A	#N/A	#N/A
1924	Os3626	Os22139	0.99997	1.33e-09		Os1924	A2J10_09T0043800.1		A2J10_11T0189500.1	oxidoreductase, 2OG-Fe oxygenase family protein, Putative, expressed	oxidoreductase, 2OG-Fe oxygenase family protein, Putative, expressed	#N/A
1925	Os5130	Os7471	0.99997	1.33e-09		Os1925	A2J10_04T0190400.1		MSTRG.14229.7	#N/A	#N/A	#N/A
1926	Os3626	Os37802	0.99997	1.33e-09		Os1926	A2J10_05T0204600.1		MSTRG.473.2	#N/A	#N/A	#N/A
1927	Os3626	Os12652	0.99997	1.33e-09		Os1927	MSTRG.19928.2		A2J10_08T0027100.1	OsDegp11 - Putative Deg protease homologue, expressed	expressed protein	Similar to cDNA clone:J023091L02, full insert sequence.
1928	Os3626	Os10643	0.99997	1.34e-09		Os1928	MSTRG.20719.1		A2J10_09T0141700.1	CPuORF39 - conserved peptide uORF-containing transcript, expressed	CPuORF39 - conserved peptide uORF-containing transcript, expressed	B-type heat shock transcription factor
1929	Os23734	Os33773	0.99997	1.34e-09		Os1929	MSTRG.19964.1		MSTRG.20437.1	#N/A	#N/A	#N/A
1930	Os3626	Os12571	0.99997	1.34e-09		Os1930	MSTRG.15541.2		A2J10_06T0118100.1	gibberellin receptor GID1L2, Putative, expressed	gibberellin receptor GID1L2, Putative, expressed	Alpha/beta hydrolase fold-3 domain containing protein.
1931	Os1129	Os25377	0.99997	1.34e-09		Os1931	A2J10_09T0016400.1		MSTRG.7452.8	#N/A	#N/A	#N/A
1932	Os3626	Os39110	0.99997	1.34e-09		Os1932	MSTRG.10597.6		A2J10_05T0046200.1	Putative UDP-glucoronosyl and UDP-glucosyl transferase domain containing protein, expressed	hydrolase, alpha/beta fold family domain containing protein, expressed	Conserved hypothetical protein.
1933	Os5130	Os36140	0.99997	1.34e-09		Os1933	MSTRG.18634.1		A2J10_11T0012700.1	cytidylyltransferase domain containing protein, expressed	#N/A	#N/A
1934	Os25570	Os33576	0.99997	1.34e-09		Os1934	A2J10_06T0032800.1		MSTRG.5667.8	#N/A	#N/A	#N/A
1935	Os3626	Os18179	0.99997	1.34e-09		Os1935	A2J10_03T0235400.2		MSTRG.7884.1	#N/A	lipin, N-terminal conserved region family protein, expressed	Lipin, N-terminal conserved region domain containing protein.
1936	Os3626	Os32273	0.99997	1.35e-09		Os1936	A2J10_02T0103100.1		MSTRG.11666.1	#N/A	oxidoreductase/ transition metal ion binding protein, Putative, expressed	Protein of unknown function DUF3531 domain containing protein.
1937	Os3626	Os21711	0.99997	1.35e-09		Os1937	A2J10_02T0266600.1		A2J10_08T0147100.1	protein kinase PKN/PRK1, effector, Putative, expressed	protein kinase PKN/PRK1, effector, Putative, expressed	Similar to Myosin-like protein.
1938	Os5130	Os43807	0.99997	1.35e-09		Os1938	MSTRG.3742.1		MSTRG.22651.1	#N/A	#N/A	#N/A
1939	Os1129	Os20578	0.99997	1.35e-09		Os1939	A2J10_05T0054800.1		MSTRG.1020.4	#N/A	#N/A	#N/A
1940	Os1129	Os24304	0.99997	1.35e-09		Os1940	MSTRG.26101.1		MSTRG.23245.1	#N/A	BES1/BZR1 homolog protein, Putative, expressed	Transcription factor, Brassinosteroid (BR)-regulated growth response, Feedback inhibition of BR biosynthesis
1941	Os1129	Os16447	0.99997	1.36e-09		Os1941	A2J10_02T0295600.2		A2J10_02T0252900.1	CCT/B-box zinc finger protein, Putative, expressed	CCT/B-box zinc finger protein, Putative, expressed	CO-like protein containing two B-box zinc finger domains and one CCT domain, Constitutive flowering repressor
1942	Os3626	Os42872	0.99997	1.36e-09		Os1942	MSTRG.19798.1		MSTRG.2997.1	#N/A	cysteine synthase, chloroplast precursor, Putative, expressed	Putative S-sulfocysteine synthase, Chloroplast development at the early seedling
1943	Os5130	Os23294	0.99997	1.36e-09		Os1943	MSTRG.9144.1		A2J10_03T0317700.1	expressed protein	expressed protein	Similar to photosystem II 11 kDa protein-related.
1944	Os25570	Os33152	0.99997	1.36e-09		Os1944	A2J10_05T0185000.1		A2J10_06T0213100.2	UDP-glucoronosyl and UDP-glucosyl transferase domain containing protein, expressed	#N/A	#N/A
1945	Os1129	Os42646	0.99997	1.36e-09		Os1945	MSTRG.18859.1		MSTRG.10305.3	#N/A	#N/A	#N/A
1946	Os1129	Os32330	0.99997	1.36e-09		Os1946	A2J10_01T0474500.1		MSTRG.13.1	#N/A	#N/A	#N/A
1947	Os5130	Os43654	0.99997	1.36e-09		Os1947	MSTRG.26795.1		A2J10_02T0053700.1	60S ribosomal protein L27a-3, Putative, expressed	60S ribosomal protein L27a-3, Putative, expressed	Similar to 60S ribosomal protein L27a (Fragment).
1948	Os1129	Os42676	0.99997	1.36e-09		Os1948	MSTRG.9509.4		MSTRG.1697.2	#N/A	#N/A	#N/A
1949	Os1129	Os44269	0.99997	1.37e-09		Os1949	A2J10_09T0158800.2		MSTRG.14523.2	#N/A	#N/A	#N/A
1950	Os3626	Os19855	0.99997	1.37e-09		Os1950	MSTRG.17364.2		A2J10_03T0187900.1	Putative expressed protein	#N/A	#N/A
1951	Os1129	Os19329	0.99997	1.37e-09		Os1951	A2J10_08T0129300.1		A2J10_01T0365400.1	Hypothetical protein	#N/A	#N/A
1952	Os3626	Os17214	0.99997	1.38e-09		Os1952	A2J10_03T0135700.1		MSTRG.4940.5	#N/A	#N/A	#N/A
1953	Os3626	Os18122	0.99997	1.38e-09		Os1953	A2J10_05T0085600.1		MSTRG.3848.6	#N/A	#N/A	#N/A
1954	Os3626	Os32176	0.99997	1.38e-09		Os1954	MSTRG.26952.1		A2J10_01T0110300.1	Conserved hypothetical protein	#N/A	#N/A
1955	Os3626	Os32177	0.99997	1.38e-09		Os1955	A2J10_07T0283100.1		MSTRG.5298.1	#N/A	#N/A	#N/A
1956	Os3626	Os24715	0.99997	1.39e-09		Os1956	MSTRG.1735.1		A2J10_12T0030100.1	D-mannose binding lectin family protein, expressed	D-mannose binding lectin family protein, expressed	S-Domain receptor like protein-12
1957	Os3626	Os14155	0.99997	1.39e-09		Os1957	MSTRG.6758.1		A2J10_07T0151100.7	translocon-associated protein beta domain containing protein, expressed	#N/A	#N/A
1958	Os3626	Os37550	0.99997	1.39e-09		Os1958	A2J10_02T0324800.1		A2J10_03T0020900.2	plant-specific domain TIGR01589 family protein, Putative, expressed	#N/A	#N/A
1959	Os1129	Os25805	0.99997	1.39e-09		Os1959	MSTRG.21482.1		MSTRG.24069.1	#N/A	#N/A	#N/A
1960	Os3626	Os42540	0.99997	1.39e-09		Os1960	A2J10_05T0209800.4		A2J10_06T0288900.1	peptide transporter, Putative, expressed	#N/A	#N/A
1961	Os1129	Os25502	0.99997	1.39e-09		Os1961	MSTRG.4705.2		A2J10_01T0131000.1	WRKY9, expressed	#N/A	Similar to WRKY transcription factor 28.
1962	Os4820	Os25224	0.999969	1.4e-09		Os1962	MSTRG.23103.1		A2J10_08T0173300.1	glycoprotein 3-alpha-L-fucosyltransferase A, Putative, expressed	#N/A	#N/A
1963	Os3626	Os37226	0.999969	1.4e-09		Os1963	MSTRG.24196.2		A2J10_04T0139300.2	STRUBBELIG-RECEPTOR FAMILY 8 precursor, Putative, expressed	#N/A	#N/A
1964	Os1129	Os40256	0.999969	1.4e-09		Os1964	MSTRG.16489.3		MSTRG.23853.1	#N/A	chloroplast 30S ribosomal protein S8, Putative, expressed	#N/A
1965	Os3626	Os13079	0.999969	1.4e-09		Os1965	A2J10_07T0291400.1		MSTRG.14519.1	#N/A	#N/A	#N/A
1966	Os3626	Os12914	0.999969	1.41e-09		Os1966	A2J10_03T0226700.1		MSTRG.3991.1	#N/A	peroxidase precursor, Putative, expressed	Peroxidase (EC 1.11.1.7).
1967	Os5130	Os42821	0.999969	1.41e-09		Os1967	MSTRG.20152.1		A2J10_02T0081000.1	Putative expressed protein	#N/A	#N/A
1968	Os3626	Os11629	0.999969	1.41e-09		Os1968	A2J10_02T0341300.1		A2J10_11T0206000.1	expressed protein	#N/A	#N/A
1969	Os5130	Os43802	0.999969	1.41e-09		Os1969	MSTRG.5854.1		MSTRG.18762.1	#N/A	transporter, major facilitator family, Putative, expressed	Major facilitator superfamily protein.
1970	Os3626	Os31836	0.999969	1.42e-09		Os1970	MSTRG.14560.1		A2J10_03T0145400.1	tRNA pseudouridine synthase family protein, Putative, expressed	#N/A	#N/A
1971	Os1129	Os24847	0.999969	1.42e-09		Os1971	A2J10_04T0060900.1		A2J10_01T0087800.1	oxidoreductase, short chain dehydrogenase/reductase family domain containing protein, expressed	oxidoreductase, short chain dehydrogenase/reductase family domain containing protein, expressed	Chlorophyll b reductase, Leaf senescence
1972	Os1129	Os39161	0.999969	1.42e-09		Os1972	MSTRG.17059.2		A2J10_06T0075900.1	NHL repeat-containing protein, Putative, expressed	NHL repeat-containing protein, Putative, expressed	#N/A
1973	Os3626	Os11232	0.999969	1.42e-09		Os1973	A2J10_01T0215800.1		A2J10_04T0320000.1	heavy metal associated domain containing protein, expressed	heavy metal associated domain containing protein, expressed	Heavy metal transport/detoxification protein domain containing protein.
1974	Os3626	Os16500	0.999969	1.42e-09		Os1974	A2J10_01T0242800.1		A2J10_08T0230300.2	growth regulator related protein, Putative, expressed	growth regulator related protein, Putative, expressed	Similar to auxin-independent growth promoter.
1975	Os1129	Os30505	0.999969	1.42e-09		Os1975	A2J10_02T0231600.1		A2J10_08T0072500.1	expressed protein	#N/A	#N/A
1976	Os3626	Os25664	0.999969	1.42e-09		Os1976	MSTRG.25832.5		MSTRG.6046.1	#N/A	#N/A	#N/A
1977	Os3626	Os37266	0.999969	1.42e-09		Os1977	MSTRG.26008.1		A2J10_03T0309600.1	pentatricopeptide, Putative, expressed	nucleic acid binding protein, Putative, expressed	Alba, DNA/RNA-binding protein family protein.
1978	Os3626	Os21786	0.999969	1.43e-09		Os1978	A2J10_07T0189600.1		MSTRG.1624.1	#N/A	#N/A	#N/A
1979	Os3626	Os36944	0.999969	1.43e-09		Os1979	MSTRG.177.1		A2J10_02T0219500.1	RING-H2 finger protein ATL3F, Putative, expressed	RING-H2 finger protein ATL3F, Putative, expressed	RING-H2 type E3 ubiquitin ligase, Root development, Maintenance of cell viability after the initiation of root primordial formation, Defense response
1980	Os1129	Os38033	0.999969	1.43e-09		Os1980	MSTRG.13202.1		MSTRG.17369.1	#N/A	#N/A	#N/A
1981	Os5130	Os43781	0.999969	1.43e-09		Os1981	MSTRG.19364.1		MSTRG.19972.5	#N/A	#N/A	#N/A
1982	Os3626	Os21651	0.999969	1.43e-09		Os1982	MSTRG.3333.5		A2J10_04T0137500.1	DNA-directed RNA polymerases I, II, and III subunit RPABC1, Putative, expressed	DNA-directed RNA polymerases I, II, and III subunit RPABC1, Putative, expressed	Similar to DNA-directed RNA polymerases II 24 kDa polypeptide.
1983	Os3626	Os42919	0.999969	1.43e-09		Os1983	A2J10_07T0047800.1		A2J10_07T0280800.1	pentatricopeptide, Putative, expressed	#N/A	#N/A
1984	Os5130	Os42536	0.999969	1.43e-09		Os1984	MSTRG.4537.1		A2J10_01T0092700.1	seven in absentia protein family domain containing protein, expressed	seven in absentia protein family domain containing protein, expressed	SIAH-type E3 ligase, Plant growth and development
1985	Os3626	Os43539	0.999969	1.43e-09		Os1985	A2J10_01T0406000.1		A2J10_10T0082200.1	Conserved hypothetical protein	#N/A	#N/A
1986	Os3626	Os42558	0.999969	1.43e-09		Os1986	MSTRG.21762.1		A2J10_03T0111600.2	Putative fip1 motif family protein, expressed	#N/A	#N/A
1987	Os3626	Os37493	0.999969	1.43e-09		Os1987	A2J10_03T0326300.1		A2J10_02T0232800.1	expressed protein	expressed protein	Conserved hypothetical protein.
1988	Os3626	Os39334	0.999969	1.43e-09		Os1988	A2J10_12T0171700.2		MSTRG.7829.2	#N/A	expressed protein	#N/A
1989	Os3626	Os31718	0.999969	1.43e-09		Os1989	A2J10_10T0084200.1		A2J10_07T0003500.1	dirigent, Putative, expressed	#N/A	#N/A
1990	Os3626	Os39131	0.999969	1.43e-09		Os1990	A2J10_02T0341900.1		A2J10_03T0006200.2	DEAD-box ATP-dependent RNA helicase, Putative, expressed	#N/A	#N/A
1991	Os3626	Os42572	0.999969	1.43e-09		Os1991	A2J10_03T0115500.1		A2J10_02T0148100.1	AGAP008475-PA, Putative, expressed	AGAP008475-PA, Putative, expressed	Similar to DC2 protein.
1992	Os3626	Os43646	0.999969	1.43e-09		Os1992	A2J10_07T0279600.1		A2J10_11T0155800.1	ubiquitin carboxyl-terminal hydrolase, family 1, Putative, expressed	#N/A	#N/A
1993	Os3626	Os43907	0.999969	1.44e-09		Os1993	A2J10_05T0264900.1		A2J10_07T0084600.1	pentatricopeptide, Putative, expressed	pentatricopeptide, Putative, expressed	Pentatricopeptide repeat domain containing protein.
1994	Os3626	Os40046	0.999969	1.44e-09		Os1994	A2J10_03T0120000.1		A2J10_09T0105100.1	Conserved hypothetical protein	#N/A	#N/A
1995	Os3626	Os31673	0.999969	1.44e-09		Os1995	A2J10_05T0241900.4		MSTRG.957.2	#N/A	#N/A	#N/A
1996	Os3626	Os31272	0.999969	1.44e-09		Os1996	MSTRG.7627.1		A2J10_04T0306500.2	MYB family transcription factor, Putative, expressed	#N/A	#N/A
1997	Os3626	Os44183	0.999969	1.44e-09		Os1997	A2J10_12T0031800.1		A2J10_11T0022600.3	astaxanthin synthase KC28, Putative, expressed	#N/A	#N/A
1998	Os3626	Os43180	0.999969	1.44e-09		Os1998	MSTRG.12683.1		A2J10_09T0165200.2	expressed protein	expressed protein	Conserved hypothetical protein.
[truncated: 42,299 more rows]

## Sheet: Figure_14
Table s8. List of genes in co-expression network.
s.n.	row	gene_id	column	gene_id	cor	p	correl
1	Os223	A2J10_01T0100800.1	Os311	A2J10_06T0303700.2	0.999743	9.92626e-08	1
2	Os780	A2J10_04T0109500.1	Os829	A2J10_02T0252900.1	0.999293	7.50465e-07	1
3	Os780	A2J10_04T0109500.1	Os1261	A2J10_04T0324100.4	0.999351	6.32392e-07	1
4	Os1498	A2J10_12T0034900.1	Os1508	MSTRG.365.1	0.999276	7.87088e-07	1
5	Os1498	A2J10_12T0034900.1	Os1582	MSTRG.13682.1	0.999548	3.06598e-07	1
6	Os1498	A2J10_12T0034900.1	Os1653	MSTRG.26279.2	0.999879	2.20875e-08	1
7	Os1498	A2J10_12T0034900.1	Os1685	MSTRG.15448.2	0.999863	2.8086e-08	1
8	Os1498	A2J10_12T0034900.1	Os1780	MSTRG.1517.1	0.999709	1.26848e-07	1
9	Os1498	A2J10_12T0034900.1	Os1940	MSTRG.26101.1	0.999245	8.54243e-07	1
10	Os1111	MSTRG.8249.1	Os2009	A2J10_07T0206300.1	0.99943	4.8761e-07	1
11	Os1111	MSTRG.8249.1	Os2175	MSTRG.7127.1	0.999197	9.6617e-07	1
12	Os1034	A2J10_01T0218700.1	Os2226	MSTRG.8905.1	0.999728	1.10773e-07	1
13	Os1111	MSTRG.8249.1	Os2326	A2J10_03T0031000.1	0.999534	3.26307e-07	1
14	Os1111	MSTRG.8249.1	Os2811	MSTRG.16125.2	0.999829	4.39907e-08	1
15	Os1034	A2J10_01T0218700.1	Os2828	A2J10_06T0046000.1	0.999471	4.1996e-07	1
16	Os1111	MSTRG.8249.1	Os2863	A2J10_02T0058900.1	0.999224	9.03243e-07	1
17	Os1034	A2J10_01T0218700.1	Os3110	A2J10_05T0254900.1	0.999271	7.97698e-07	1
18	Os1111	MSTRG.8249.1	Os3505	A2J10_03T0364600.1	0.999289	7.57696e-07	1
19	Os3499	A2J10_02T0361400.1	Os3523	A2J10_02T0123300.1	0.999841	3.79479e-08	1
20	Os3425	MSTRG.19958.1	Os3996	A2J10_01T0250100.1	0.999465	4.30013e-07	1
21	Os3425	MSTRG.19958.1	Os4206	A2J10_12T0124700.3	0.999759	8.7326e-08	1
22	Os4223	MSTRG.21588.1	Os4313	A2J10_02T0033900.2	0.999866	2.68037e-08	1
23	Os4223	MSTRG.21588.1	Os4539	A2J10_01T0008200.1	0.999311	7.12866e-07	1
24	Os3908	A2J10_07T0188400.1	Os4556	MSTRG.12894.1	0.999289	7.57316e-07	1
25	Os4678	A2J10_10T0081100.2	Os4689	MSTRG.1448.1	0.99935	6.34062e-07	1
26	Os4678	A2J10_10T0081100.2	Os4698	MSTRG.13013.3	0.999613	2.25131e-07	1
27	Os4678	A2J10_10T0081100.2	Os4760	A2J10_03T0098000.1	0.999791	6.53361e-08	1
28	Os4678	A2J10_10T0081100.2	Os4772	A2J10_01T0095200.1	0.999998	4.11182e-12	1
29	Os4678	A2J10_10T0081100.2	Os4820	A2J10_01T0488300.2	0.999812	5.30121e-08	1
30	Os4451	A2J10_07T0201200.1	Os4821	MSTRG.13061.2	0.999446	4.59774e-07	1
31	Os4678	A2J10_10T0081100.2	Os4985	A2J10_01T0474000.1	0.999594	2.4714e-07	1
32	Os3499	A2J10_02T0361400.1	Os5046	A2J10_02T0023000.1	0.99935	6.34573e-07	1
33	Os4678	A2J10_10T0081100.2	Os5047	MSTRG.14854.1	0.999222	9.07959e-07	1
34	Os3425	MSTRG.19958.1	Os5081	A2J10_07T0026400.1	0.999673	1.59908e-07	1
35	Os3425	MSTRG.19958.1	Os5121	A2J10_08T0030800.1	0.999246	8.51632e-07	1
36	Os4678	A2J10_10T0081100.2	Os5130	A2J10_08T0012500.1	0.999961	2.2532e-09	1
37	Os4678	A2J10_10T0081100.2	Os5136	A2J10_07T0188200.1	0.999542	3.14198e-07	1
38	Os4678	A2J10_10T0081100.2	Os5182	A2J10_07T0161500.3	0.9992	9.59538e-07	1
39	Os4451	A2J10_07T0201200.1	Os5192	A2J10_01T0125300.1	0.999742	9.99134e-08	1
40	Os4223	MSTRG.21588.1	Os5224	MSTRG.11092.1	0.999509	3.61088e-07	1
41	Os4678	A2J10_10T0081100.2	Os5261	A2J10_01T0506600.1	0.999519	3.47294e-07	1
42	Os4678	A2J10_10T0081100.2	Os5278	A2J10_05T0225500.1	0.99956	2.89919e-07	1
43	Os4678	A2J10_10T0081100.2	Os5300	A2J10_12T0026500.1	0.999581	2.63377e-07	1
44	Os4678	A2J10_10T0081100.2	Os5306	A2J10_04T0036100.1	0.999352	6.29906e-07	1
45	Os4223	MSTRG.21588.1	Os5416	A2J10_08T0194900.1	0.999649	1.85051e-07	1
46	Os4428	A2J10_09T0095300.1	Os5435	MSTRG.7888.2	0.999711	1.25158e-07	1
47	Os5456	A2J10_12T0138700.1	Os5506	MSTRG.22712.3	0.999362	6.11288e-07	1
48	Os4678	A2J10_10T0081100.2	Os5524	A2J10_12T0013200.1	0.999772	7.7828e-08	1
49	Os4223	MSTRG.21588.1	Os5542	A2J10_11T0077800.1	0.999546	3.08854e-07	1
50	Os5428	A2J10_06T0217600.1	Os5554	A2J10_02T0247900.1	0.999464	4.30968e-07	1
51	Os4678	A2J10_10T0081100.2	Os5563	MSTRG.14486.1	0.999631	2.04377e-07	1
52	Os4223	MSTRG.21588.1	Os5581	A2J10_02T0204500.1	0.999291	7.5436e-07	1
53	Os4678	A2J10_10T0081100.2	Os5585	A2J10_07T0196300.1	0.999991	1.16942e-10	1
54	Os5456	A2J10_12T0138700.1	Os5601	A2J10_05T0268100.1	0.999741	1.00227e-07	1
55	Os5456	A2J10_12T0138700.1	Os5626	A2J10_04T0000800.1	0.999333	6.6735e-07	1
56	Os4678	A2J10_10T0081100.2	Os5638	A2J10_03T0006300.1	0.999621	2.15889e-07	1
57	Os5456	A2J10_12T0138700.1	Os5640	A2J10_07T0152100.1	0.999829	4.40324e-08	1
58	Os4451	A2J10_07T0201200.1	Os5705	MSTRG.2098.1	0.99954	3.18011e-07	1
59	Os4678	A2J10_10T0081100.2	Os5708	MSTRG.5279.1	0.999908	1.27864e-08	1
60	Os4678	A2J10_10T0081100.2	Os5723	A2J10_01T0206900.1	0.999658	1.7591e-07	1
61	Os5456	A2J10_12T0138700.1	Os5724	MSTRG.6741.1	0.999708	1.27502e-07	1
62	Os5456	A2J10_12T0138700.1	Os5789	A2J10_01T0140600.1	0.999754	9.09282e-08	1
63	Os5428	A2J10_06T0217600.1	Os5810	MSTRG.6812.1	0.999198	9.63896e-07	1
64	Os4678	A2J10_10T0081100.2	Os5847	A2J10_12T0157200.1	0.999297	7.40968e-07	1
65	Os4678	A2J10_10T0081100.2	Os5856	A2J10_06T0055500.1	0.999841	3.81522e-08	1
66	Os4223	MSTRG.21588.1	Os5874	MSTRG.17635.2	0.999558	2.92716e-07	1
67	Os4678	A2J10_10T0081100.2	Os5881	MSTRG.19110.2	0.999343	6.48258e-07	1
68	Os4678	A2J10_10T0081100.2	Os5893	A2J10_07T0135300.1	0.999501	3.74006e-07	1
69	Os5819	A2J10_07T0160600.1	Os5893	A2J10_07T0135300.1	0.999238	8.70338e-07	1
70	Os5456	A2J10_12T0138700.1	Os5895	A2J10_01T0478000.1	0.999666	1.67107e-07	1
71	Os5428	A2J10_06T0217600.1	Os5903	A2J10_07T0031600.1	0.999285	7.66005e-07	1
72	Os4678	A2J10_10T0081100.2	Os5922	A2J10_06T0159700.1	0.999997	1.14917e-11	1
73	Os4678	A2J10_10T0081100.2	Os5946	MSTRG.6555.1	0.999917	1.02127e-08	1
74	Os5456	A2J10_12T0138700.1	Os5949	A2J10_11T0105200.1	0.999774	7.65742e-08	1
75	Os5428	A2J10_06T0217600.1	Os5972	A2J10_04T0260700.1	0.999654	1.79829e-07	1
76	Os5456	A2J10_12T0138700.1	Os5989	MSTRG.7729.1	0.999444	4.64163e-07	1
77	Os5428	A2J10_06T0217600.1	Os6007	A2J10_01T0304800.1	0.99946	4.36997e-07	1
78	Os5819	A2J10_07T0160600.1	Os6080	MSTRG.17816.1	0.999202	9.55808e-07	1
79	Os4678	A2J10_10T0081100.2	Os6097	MSTRG.14838.1	0.99991	1.22596e-08	1
80	Os4678	A2J10_10T0081100.2	Os6123	A2J10_02T0013200.1	0.999835	4.08742e-08	1
81	Os4678	A2J10_10T0081100.2	Os6124	MSTRG.17739.2	0.999467	4.2617e-07	1
82	Os4678	A2J10_10T0081100.2	Os6136	MSTRG.19879.1	0.999751	9.30541e-08	1
83	Os5456	A2J10_12T0138700.1	Os6227	A2J10_03T0194100.1	0.999452	4.50887e-07	1
84	Os5456	A2J10_12T0138700.1	Os6247	MSTRG.6648.1	0.999515	3.52382e-07	1
85	Os4678	A2J10_10T0081100.2	Os6255	A2J10_01T0412600.1	0.99973	1.0972e-07	1
86	Os4678	A2J10_10T0081100.2	Os6309	A2J10_04T0259700.1	0.999303	7.29329e-07	1
87	Os4678	A2J10_10T0081100.2	Os6314	MSTRG.20432.1	0.999943	4.89631e-09	1
88	Os5456	A2J10_12T0138700.1	Os6332	MSTRG.14651.1	0.999538	3.20191e-07	1
89	Os5819	A2J10_07T0160600.1	Os6334	A2J10_02T0420400.1	0.999527	3.35157e-07	1
90	Os5456	A2J10_12T0138700.1	Os6358	A2J10_03T0325900.1	0.999299	7.37516e-07	1
91	Os4678	A2J10_10T0081100.2	Os6361	MSTRG.19095.4	0.999978	7.01027e-10	1
92	Os4678	A2J10_10T0081100.2	Os6420	A2J10_10T0135800.1	0.999492	3.86722e-07	1
93	Os5819	A2J10_07T0160600.1	Os6420	A2J10_10T0135800.1	0.999498	3.77358e-07	1
94	Os4678	A2J10_10T0081100.2	Os6478	A2J10_02T0310200.1	0.999946	4.42161e-09	1
95	Os5456	A2J10_12T0138700.1	Os6504	A2J10_02T0323800.1	0.999761	8.53278e-08	1
96	Os4451	A2J10_07T0201200.1	Os6516	MSTRG.1718.1	0.999359	6.15443e-07	1
97	Os5428	A2J10_06T0217600.1	Os6538	MSTRG.24376.2	0.999221	9.10247e-07	1
98	Os5456	A2J10_12T0138700.1	Os6538	MSTRG.24376.2	0.999675	1.58347e-07	1
99	Os4678	A2J10_10T0081100.2	Os6572	A2J10_08T0195000.2	0.999633	2.02023e-07	1
100	Os4678	A2J10_10T0081100.2	Os6580	A2J10_05T0073800.1	0.999988	2.20751e-10	1
101	Os5428	A2J10_06T0217600.1	Os6614	A2J10_06T0301700.1	0.999597	2.43103e-07	1
102	Os5456	A2J10_12T0138700.1	Os6651	A2J10_02T0019500.1	0.999729	1.09947e-07	1
103	Os5456	A2J10_12T0138700.1	Os6654	A2J10_06T0217300.2	0.999216	9.22345e-07	1
104	Os4678	A2J10_10T0081100.2	Os6655	A2J10_02T0381500.1	0.999728	1.10758e-07	1
105	Os5819	A2J10_07T0160600.1	Os6663	MSTRG.23151.1	0.99972	1.17304e-07	1
106	Os5819	A2J10_07T0160600.1	Os6737	A2J10_04T0014200.1	0.999409	5.24569e-07	1
107	Os5456	A2J10_12T0138700.1	Os6739	A2J10_12T0166700.2	0.999422	5.01159e-07	1
108	Os5428	A2J10_06T0217600.1	Os6772	A2J10_01T0376200.1	0.999522	3.42822e-07	1
109	Os5428	A2J10_06T0217600.1	Os6792	A2J10_01T0448800.1	0.99977	7.94063e-08	1
110	Os5819	A2J10_07T0160600.1	Os6845	A2J10_06T0080100.1	0.999829	4.39043e-08	1
111	Os5428	A2J10_06T0217600.1	Os6870	A2J10_03T0027100.1	0.999404	5.32771e-07	1
112	Os5428	A2J10_06T0217600.1	Os6885	MSTRG.14210.1	0.999374	5.88027e-07	1
113	Os5456	A2J10_12T0138700.1	Os6885	MSTRG.14210.1	0.99919	9.8475e-07	1
114	Os5456	A2J10_12T0138700.1	Os6889	A2J10_06T0155800.1	0.999766	8.18237e-08	1
115	Os5428	A2J10_06T0217600.1	Os6894	A2J10_01T0067400.1	0.99973	1.08945e-07	1
116	Os4678	A2J10_10T0081100.2	Os6907	A2J10_03T0340500.1	0.999615	2.22318e-07	1
117	Os5456	A2J10_12T0138700.1	Os6923	A2J10_06T0085300.1	0.999247	8.49951e-07	1
118	Os4428	A2J10_09T0095300.1	Os6934	A2J10_12T0071900.1	0.999212	9.31655e-07	1
119	Os4678	A2J10_10T0081100.2	Os7018	A2J10_11T0218900.1	0.999993	8.2564e-11	1
120	Os4678	A2J10_10T0081100.2	Os7027	A2J10_01T0105900.1	0.999994	5.24967e-11	1
121	Os4678	A2J10_10T0081100.2	Os7042	A2J10_09T0185900.1	0.999702	1.33161e-07	1
122	Os5819	A2J10_07T0160600.1	Os7042	A2J10_09T0185900.1	0.999225	9.00449e-07	1
123	Os5456	A2J10_12T0138700.1	Os7139	A2J10_02T0328500.1	0.999347	6.39187e-07	1
124	Os5428	A2J10_06T0217600.1	Os7149	MSTRG.26323.1	0.999309	7.16345e-07	1
125	Os5456	A2J10_12T0138700.1	Os7159	A2J10_08T0028200.1	0.999545	3.10891e-07	1
126	Os4678	A2J10_10T0081100.2	Os7165	A2J10_02T0287900.3	0.999294	7.47189e-07	1
127	Os4678	A2J10_10T0081100.2	Os7173	A2J10_03T0310700.6	0.999936	6.05459e-09	1
128	Os5456	A2J10_12T0138700.1	Os7187	A2J10_05T0031700.1	0.999381	5.75341e-07	1
129	Os5456	A2J10_12T0138700.1	Os7247	A2J10_12T0080900.1	0.99942	5.03863e-07	1
130	Os5428	A2J10_06T0217600.1	Os7284	A2J10_03T0212000.1	0.999638	1.96862e-07	1
131	Os4678	A2J10_10T0081100.2	Os7288	A2J10_01T0386900.1	0.999998	8.42459e-12	1
132	Os5819	A2J10_07T0160600.1	Os7332	A2J10_07T0180000.1	0.999785	6.92863e-08	1
133	Os4678	A2J10_10T0081100.2	Os7437	MSTRG.23059.1	0.999688	1.46077e-07	1
134	Os5428	A2J10_06T0217600.1	Os7468	MSTRG.25493.2	0.999417	5.09497e-07	1
135	Os4678	A2J10_10T0081100.2	Os7471	A2J10_04T0123700.1	0.999999	1.36668e-12	1
136	Os6464	A2J10_04T0318800.1	Os7481	MSTRG.19223.1	0.999226	8.97858e-07	1
137	Os4678	A2J10_10T0081100.2	Os7513	A2J10_03T0173400.1	0.999389	5.59189e-07	1
138	Os4678	A2J10_10T0081100.2	Os7551	MSTRG.21401.1	0.999219	9.15777e-07	1
139	Os4678	A2J10_10T0081100.2	Os7582	A2J10_11T0026000.5	0.999667	1.66224e-07	1
140	Os6537	MSTRG.8588.1	Os7608	A2J10_03T0246600.2	0.999481	4.04247e-07	1
141	Os4678	A2J10_10T0081100.2	Os7624	A2J10_07T0293000.1	0.999999	1.76437e-12	1
142	Os5428	A2J10_06T0217600.1	Os7628	MSTRG.26165.1	0.999281	7.74187e-07	1
143	Os5456	A2J10_12T0138700.1	Os7742	MSTRG.8630.2	0.999383	5.70055e-07	1
144	Os5819	A2J10_07T0160600.1	Os7752	MSTRG.2433.1	0.999502	3.72538e-07	1
145	Os5456	A2J10_12T0138700.1	Os7759	A2J10_06T0272500.1	0.999465	4.29784e-07	1
146	Os5428	A2J10_06T0217600.1	Os7782	A2J10_03T0292100.1	0.999289	7.5851e-07	1
147	Os5428	A2J10_06T0217600.1	Os7787	A2J10_07T0100900.1	0.999538	3.19706e-07	1
148	Os5456	A2J10_12T0138700.1	Os7829	A2J10_03T0102900.1	0.999514	3.54777e-07	1
149	Os4678	A2J10_10T0081100.2	Os7834	A2J10_02T0015700.1	0.999445	4.62703e-07	1
150	Os5456	A2J10_12T0138700.1	Os7880	MSTRG.22233.1	0.999233	8.81642e-07	1
151	Os5456	A2J10_12T0138700.1	Os7912	A2J10_02T0214500.1	0.999478	4.08151e-07	1
152	Os6537	MSTRG.8588.1	Os8014	A2J10_09T0014100.1	0.999522	3.42739e-07	1
153	Os5819	A2J10_07T0160600.1	Os8031	A2J10_08T0070100.1	0.999188	9.87625e-07	1
154	Os5456	A2J10_12T0138700.1	Os8047	MSTRG.25453.2	0.999224	9.02441e-07	1
155	Os7532	A2J10_11T0161900.1	Os8050	A2J10_09T0029400.1	0.999601	2.3831e-07	1
156	Os4678	A2J10_10T0081100.2	Os8053	A2J10_08T0215600.2	0.999685	1.49156e-07	1
157	Os4678	A2J10_10T0081100.2	Os8060	A2J10_07T0232300.1	0.999635	1.99634e-07	1
158	Os5819	A2J10_07T0160600.1	Os8060	A2J10_07T0232300.1	0.999287	7.63326e-07	1
159	Os6537	MSTRG.8588.1	Os8076	MSTRG.7800.1	0.999469	4.22777e-07	1
160	Os4678	A2J10_10T0081100.2	Os8112	MSTRG.10201.2	0.99962	2.16418e-07	1
161	Os4678	A2J10_10T0081100.2	Os8121	MSTRG.21225.1	0.99919	9.84234e-07	1
162	Os4678	A2J10_10T0081100.2	Os8138	A2J10_02T0286500.4	0.999831	4.3086e-08	1
163	Os5819	A2J10_07T0160600.1	Os8147	A2J10_06T0074800.1	0.999694	1.40555e-07	1
164	Os4678	A2J10_10T0081100.2	Os8153	A2J10_02T0282300.1	0.999994	5.57514e-11	1
165	Os5428	A2J10_06T0217600.1	Os8195	MSTRG.19176.2	0.999441	4.68777e-07	1
166	Os4678	A2J10_10T0081100.2	Os8220	A2J10_03T0359700.1	0.999949	3.97263e-09	1
167	Os4678	A2J10_10T0081100.2	Os8223	A2J10_10T0050800.1	0.999868	2.61697e-08	1
168	Os5456	A2J10_12T0138700.1	Os8233	A2J10_03T0369100.1	0.999249	8.45073e-07	1
169	Os4678	A2J10_10T0081100.2	Os8320	A2J10_07T0077300.3	0.999328	6.77226e-07	1
170	Os4678	A2J10_10T0081100.2	Os8325	A2J10_03T0145800.2	1	7.63833e-14	1
171	Os4678	A2J10_10T0081100.2	Os8394	A2J10_01T0437700.1	0.999775	7.6194e-08	1
172	Os4678	A2J10_10T0081100.2	Os8396	A2J10_05T0235400.1	0.999902	1.43508e-08	1
173	Os4678	A2J10_10T0081100.2	Os8402	A2J10_02T0162500.1	1	3.56604e-13	1
174	Os7532	A2J10_11T0161900.1	Os8444	A2J10_01T0216100.2	0.99945	4.5395e-07	1
175	Os4678	A2J10_10T0081100.2	Os8477	MSTRG.24642.1	0.999965	1.86127e-09	1
176	Os5819	A2J10_07T0160600.1	Os8483	MSTRG.9039.2	0.99961	2.28252e-07	1
177	Os4678	A2J10_10T0081100.2	Os8507	MSTRG.9300.1	0.999971	1.26474e-09	1
178	Os7486	A2J10_05T0260600.1	Os8565	A2J10_05T0154600.5	0.999737	1.03599e-07	1
179	Os5819	A2J10_07T0160600.1	Os8576	A2J10_04T0144600.1	0.999581	2.63498e-07	1
180	Os4678	A2J10_10T0081100.2	Os8628	A2J10_06T0166300.1	0.999917	1.03874e-08	1
181	Os4678	A2J10_10T0081100.2	Os8639	A2J10_01T0428100.1	0.999818	4.99004e-08	1
182	Os5456	A2J10_12T0138700.1	Os8641	A2J10_05T0251100.1	0.999204	9.49847e-07	1
183	Os5456	A2J10_12T0138700.1	Os8660	A2J10_11T0206600.1	0.999475	4.13162e-07	1
184	Os4678	A2J10_10T0081100.2	Os8680	A2J10_07T0233800.1	0.999758	8.78325e-08	1
185	Os4678	A2J10_10T0081100.2	Os8687	A2J10_03T0120700.1	0.999666	1.67521e-07	1
186	Os4678	A2J10_10T0081100.2	Os8724	A2J10_07T0292700.3	1	2.25153e-13	1
187	Os7797	A2J10_04T0285000.1	Os8750	MSTRG.1734.2	0.999197	9.65868e-07	1
188	Os7486	A2J10_05T0260600.1	Os8791	MSTRG.13245.5	0.999311	7.1209e-07	1
189	Os4678	A2J10_10T0081100.2	Os8807	MSTRG.11875.1	0.999573	2.72817e-07	1
190	Os4678	A2J10_10T0081100.2	Os8822	A2J10_07T0183900.1	0.999509	3.61115e-07	1
191	Os5456	A2J10_12T0138700.1	Os8823	MSTRG.26119.1	0.999298	7.3851e-07	1
192	Os5456	A2J10_12T0138700.1	Os8883	MSTRG.20654.1	0.999227	8.97108e-07	1
193	Os4678	A2J10_10T0081100.2	Os8887	MSTRG.10430.2	0.999664	1.6947e-07	1
194	Os4678	A2J10_10T0081100.2	Os8894	A2J10_04T0324600.2	0.999787	6.83234e-08	1
195	Os4678	A2J10_10T0081100.2	Os8909	A2J10_10T0064000.1	0.999493	3.86167e-07	1
196	Os4678	A2J10_10T0081100.2	Os8928	MSTRG.9732.1	0.999759	8.67718e-08	1
197	Os7797	A2J10_04T0285000.1	Os8940	MSTRG.11722.2	0.999794	6.36442e-08	1
198	Os4678	A2J10_10T0081100.2	Os8944	MSTRG.4429.1	0.999579	2.66452e-07	1
199	Os4678	A2J10_10T0081100.2	Os9021	A2J10_03T0009600.1	0.999607	2.31182e-07	1
200	Os5819	A2J10_07T0160600.1	Os9021	A2J10_03T0009600.1	0.999364	6.07367e-07	1
201	Os7486	A2J10_05T0260600.1	Os9036	A2J10_08T0093900.1	0.999216	9.21009e-07	1
202	Os5819	A2J10_07T0160600.1	Os9083	A2J10_08T0019800.1	0.999821	4.79286e-08	1
203	Os8834	MSTRG.2026.1	Os9084	MSTRG.24149.1	0.999842	3.75868e-08	1
204	Os4678	A2J10_10T0081100.2	Os9093	A2J10_01T0161100.1	0.999219	9.15816e-07	1
205	Os8836	A2J10_03T0320600.1	Os9095	MSTRG.18140.2	0.999647	1.87278e-07	1
206	Os4678	A2J10_10T0081100.2	Os9111	A2J10_05T0207600.1	0.999346	6.42367e-07	1
207	Os5819	A2J10_07T0160600.1	Os9111	A2J10_05T0207600.1	0.999394	5.49872e-07	1
208	Os4678	A2J10_10T0081100.2	Os9115	A2J10_10T0132300.2	0.999582	2.62236e-07	1
209	Os4678	A2J10_10T0081100.2	Os9154	MSTRG.13939.2	0.999908	1.26611e-08	1
210	Os5456	A2J10_12T0138700.1	Os9209	A2J10_03T0001400.2	0.999341	6.50628e-07	1
211	Os4678	A2J10_10T0081100.2	Os9229	A2J10_06T0109700.2	0.999996	2.70592e-11	1
212	Os8836	A2J10_03T0320600.1	Os9232	A2J10_03T0292400.1	0.999896	1.6122e-08	1
213	Os4678	A2J10_10T0081100.2	Os9295	A2J10_03T0076700.1	0.999615	2.22386e-07	1
214	Os5819	A2J10_07T0160600.1	Os9326	A2J10_12T0092500.1	0.999938	5.84116e-09	1
215	Os8836	A2J10_03T0320600.1	Os9335	A2J10_05T0214200.2	0.999597	2.43884e-07	1
216	Os5819	A2J10_07T0160600.1	Os9336	A2J10_07T0120800.1	0.999487	3.94664e-07	1
217	Os3466	A2J10_03T0360200.1	Os9411	MSTRG.9590.1	0.99932	6.92514e-07	1
218	Os6079	MSTRG.21022.1	Os9437	A2J10_06T0247000.1	0.999339	6.55835e-07	1
219	Os4678	A2J10_10T0081100.2	Os9479	MSTRG.11614.2	0.999892	1.74051e-08	1
220	Os4678	A2J10_10T0081100.2	Os9547	MSTRG.5838.1	0.999219	9.14519e-07	1
221	Os8836	A2J10_03T0320600.1	Os9599	A2J10_02T0140000.1	0.99927	7.99724e-07	1
222	Os8836	A2J10_03T0320600.1	Os9699	MSTRG.7213.1	0.999437	4.74869e-07	1
223	Os5819	A2J10_07T0160600.1	Os9727	MSTRG.8239.2	0.999852	3.27456e-08	1
224	Os4678	A2J10_10T0081100.2	Os9728	A2J10_01T0207600.1	0.999949	3.97519e-09	1
225	Os8836	A2J10_03T0320600.1	Os9731	MSTRG.24750.1	0.999255	8.33229e-07	1
226	Os4678	A2J10_10T0081100.2	Os9733	A2J10_02T0102700.5	0.999838	3.92688e-08	1
227	Os4678	A2J10_10T0081100.2	Os9757	A2J10_04T0311300.2	0.999457	4.4292e-07	1
228	Os4678	A2J10_10T0081100.2	Os9821	A2J10_07T0231100.4	0.999349	6.35219e-07	1
229	Os5819	A2J10_07T0160600.1	Os9821	A2J10_07T0231100.4	0.999692	1.41899e-07	1
230	Os7532	A2J10_11T0161900.1	Os9836	MSTRG.15702.1	0.999579	2.65731e-07	1
231	Os8836	A2J10_03T0320600.1	Os9889	A2J10_01T0449500.1	0.999235	8.77524e-07	1
232	Os5819	A2J10_07T0160600.1	Os9899	A2J10_02T0056200.1	0.999732	1.07446e-07	1
233	Os8836	A2J10_03T0320600.1	Os9919	A2J10_05T0211900.1	0.999517	3.50598e-07	1
234	Os4678	A2J10_10T0081100.2	Os9964	A2J10_06T0022000.1	0.999365	6.0513e-07	1
235	Os4678	A2J10_10T0081100.2	Os10018	MSTRG.7713.1	0.999349	6.35051e-07	1
236	Os5819	A2J10_07T0160600.1	Os10018	MSTRG.7713.1	0.999303	7.28505e-07	1
237	Os4678	A2J10_10T0081100.2	Os10041	MSTRG.2438.1	0.999818	4.95369e-08	1
238	Os4678	A2J10_10T0081100.2	Os10059	MSTRG.23158.2	0.999931	7.23855e-09	1
239	Os4678	A2J10_10T0081100.2	Os10135	A2J10_09T0194200.2	0.999848	3.45802e-08	1
240	Os4678	A2J10_10T0081100.2	Os10156	A2J10_05T0069200.1	0.999679	1.5454e-07	1
241	Os6079	MSTRG.21022.1	Os10169	MSTRG.25184.1	0.999308	7.1864e-07	1
242	Os9851	A2J10_11T0031200.1	Os10179	A2J10_08T0113900.1	0.999438	4.74035e-07	1
243	Os4678	A2J10_10T0081100.2	Os10192	MSTRG.10821.2	0.999639	1.95004e-07	1
244	Os8836	A2J10_03T0320600.1	Os10257	A2J10_04T0071500.1	0.999289	7.5791e-07	1
245	Os4678	A2J10_10T0081100.2	Os10267	A2J10_07T0040600.2	0.999917	1.02993e-08	1
246	Os4678	A2J10_10T0081100.2	Os10270	MSTRG.26717.1	0.999481	4.03669e-07	1
247	Os4678	A2J10_10T0081100.2	Os10292	A2J10_07T0000900.1	0.999958	2.60469e-09	1
248	Os4678	A2J10_10T0081100.2	Os10325	A2J10_08T0074800.1	0.999506	3.66607e-07	1
249	Os4678	A2J10_10T0081100.2	Os10370	A2J10_06T0032700.1	0.999802	5.90371e-08	1
250	Os4678	A2J10_10T0081100.2	Os10433	A2J10_01T0181500.1	0.999915	1.07488e-08	1
251	Os4678	A2J10_10T0081100.2	Os10449	A2J10_07T0175200.1	0.999694	1.40773e-07	1
252	Os4678	A2J10_10T0081100.2	Os10480	A2J10_09T0198900.1	0.999202	9.54159e-07	1
253	Os4678	A2J10_10T0081100.2	Os10553	A2J10_09T0151900.1	0.999866	2.7086e-08	1
254	Os4678	A2J10_10T0081100.2	Os10555	A2J10_01T0355000.1	0.999988	2.28572e-10	1
255	Os4678	A2J10_10T0081100.2	Os10567	A2J10_09T0001500.1	0.999972	1.14182e-09	1
256	Os9851	A2J10_11T0031200.1	Os10584	A2J10_09T0173900.1	0.99936	6.13888e-07	1
257	Os4678	A2J10_10T0081100.2	Os10615	A2J10_09T0004300.1	0.99955	3.03092e-07	1
258	Os4678	A2J10_10T0081100.2	Os10643	A2J10_06T0216300.1	0.999999	8.6775e-13	1
259	Os4678	A2J10_10T0081100.2	Os10644	MSTRG.22561.2	0.999944	4.67195e-09	1
260	Os4678	A2J10_10T0081100.2	Os10720	A2J10_07T0138300.1	0.999828	4.45337e-08	1
261	Os4678	A2J10_10T0081100.2	Os10745	A2J10_04T0203900.2	0.999859	2.99676e-08	1
262	Os7532	A2J10_11T0161900.1	Os10782	A2J10_05T0057300.2	0.999252	8.38251e-07	1
263	Os4678	A2J10_10T0081100.2	Os10786	A2J10_11T0207000.1	0.999984	3.65769e-10	1
264	Os4678	A2J10_10T0081100.2	Os10800	A2J10_06T0146700.1	0.99979	6.6036e-08	1
265	Os4678	A2J10_10T0081100.2	Os10817	A2J10_05T0201400.1	0.999614	2.23996e-07	1
266	Os4678	A2J10_10T0081100.2	Os10826	MSTRG.7704.1	0.999343	6.46576e-07	1
267	Os5819	A2J10_07T0160600.1	Os10826	MSTRG.7704.1	0.99923	8.87982e-07	1
268	Os10625	A2J10_06T0007400.1	Os10843	A2J10_04T0291100.1	0.999711	1.24905e-07	1
269	Os5819	A2J10_07T0160600.1	Os10850	A2J10_04T0191100.1	0.999821	4.80237e-08	1
270	Os5819	A2J10_07T0160600.1	Os10854	A2J10_12T0170400.1	0.999652	1.81324e-07	1
271	Os9851	A2J10_11T0031200.1	Os10857	MSTRG.4281.1	0.999597	2.43986e-07	1
272	Os10625	A2J10_06T0007400.1	Os10892	A2J10_02T0388300.1	0.999345	6.42907e-07	1
273	Os5819	A2J10_07T0160600.1	Os10918	MSTRG.9941.1	0.999745	9.7374e-08	1
274	Os10625	A2J10_06T0007400.1	Os10938	A2J10_01T0045700.1	0.999735	1.05442e-07	1
275	Os4678	A2J10_10T0081100.2	Os10942	A2J10_04T0303000.2	0.999609	2.29325e-07	1
276	Os4678	A2J10_10T0081100.2	Os10953	A2J10_07T0281000.8	0.999636	1.98487e-07	1
277	Os6464	A2J10_04T0318800.1	Os11018	MSTRG.18807.2	0.99944	4.69775e-07	1
278	Os11015	MSTRG.20554.1	Os11039	MSTRG.25977.1	0.999455	4.46169e-07	1
279	Os4678	A2J10_10T0081100.2	Os11056	A2J10_10T0172500.1	0.999797	6.16931e-08	1
280	Os4678	A2J10_10T0081100.2	Os11077	A2J10_10T0127700.1	0.999666	1.66989e-07	1
281	Os4678	A2J10_10T0081100.2	Os11089	A2J10_03T0178100.1	0.999986	2.9772e-10	1
282	Os4678	A2J10_10T0081100.2	Os11105	A2J10_06T0255400.1	0.999518	3.47902e-07	1
283	Os4678	A2J10_10T0081100.2	Os11121	A2J10_01T0306900.1	0.999987	2.60961e-10	1
284	Os10466	A2J10_03T0148200.1	Os11133	A2J10_05T0017900.2	0.999454	4.46528e-07	1
285	Os5819	A2J10_07T0160600.1	Os11136	A2J10_03T0036700.1	0.999563	2.86506e-07	1
286	Os10625	A2J10_06T0007400.1	Os11136	A2J10_03T0036700.1	0.999338	6.577e-07	1
287	Os7532	A2J10_11T0161900.1	Os11152	A2J10_02T0025200.1	0.999352	6.29929e-07	1
288	Os4678	A2J10_10T0081100.2	Os11163	MSTRG.14209.2	0.999842	3.73069e-08	1
289	Os4678	A2J10_10T0081100.2	Os11171	A2J10_03T0036500.1	0.999245	8.55434e-07	1
290	Os4678	A2J10_10T0081100.2	Os11232	A2J10_02T0295500.1	0.999999	1.23856e-12	1
291	Os4678	A2J10_10T0081100.2	Os11237	A2J10_10T0045400.1	0.999729	1.10194e-07	1
292	Os4678	A2J10_10T0081100.2	Os11242	MSTRG.16873.1	0.999409	5.23236e-07	1
293	Os5819	A2J10_07T0160600.1	Os11258	A2J10_08T0209200.1	0.999934	6.62627e-09	1
294	Os4678	A2J10_10T0081100.2	Os11259	A2J10_06T0287200.2	0.999398	5.43535e-07	1
295	Os5819	A2J10_07T0160600.1	Os11259	A2J10_06T0287200.2	0.999227	8.96279e-07	1
296	Os4678	A2J10_10T0081100.2	Os11278	A2J10_11T0213600.1	0.999986	2.80198e-10	1
297	Os10625	A2J10_06T0007400.1	Os11303	A2J10_09T0143500.1	0.999507	3.64424e-07	1
298	Os4678	A2J10_10T0081100.2	Os11311	A2J10_01T0038300.2	0.999739	1.02115e-07	1
299	Os4678	A2J10_10T0081100.2	Os11325	A2J10_03T0255500.2	0.999676	1.5771e-07	1
300	Os5819	A2J10_07T0160600.1	Os11381	A2J10_01T0376800.1	0.999248	8.48446e-07	1
301	Os9851	A2J10_11T0031200.1	Os11403	MSTRG.19791.1	0.999203	9.51667e-07	1
302	Os5819	A2J10_07T0160600.1	Os11404	A2J10_01T0374600.1	0.999383	5.70239e-07	1
303	Os4678	A2J10_10T0081100.2	Os11418	MSTRG.682.2	0.999966	1.75395e-09	1
304	Os4678	A2J10_10T0081100.2	Os11423	A2J10_03T0203200.1	0.999514	3.5471e-07	1
305	Os4678	A2J10_10T0081100.2	Os11436	A2J10_06T0055000.1	0.999922	9.12056e-09	1
306	Os4678	A2J10_10T0081100.2	Os11437	MSTRG.5161.1	0.999645	1.89286e-07	1
307	Os4678	A2J10_10T0081100.2	Os11460	A2J10_04T0261800.1	0.999968	1.53514e-09	1
308	Os4678	A2J10_10T0081100.2	Os11481	A2J10_06T0197400.2	0.999715	1.21894e-07	1
309	Os7532	A2J10_11T0161900.1	Os11498	A2J10_02T0189000.1	0.999465	4.28545e-07	1
310	Os4678	A2J10_10T0081100.2	Os11511	A2J10_05T0102500.1	0.99995	3.682e-09	1
311	Os4678	A2J10_10T0081100.2	Os11530	A2J10_07T0202100.1	0.999319	6.95021e-07	1
312	Os9527	A2J10_01T0074700.1	Os11542	MSTRG.12499.1	0.999521	3.43557e-07	1
313	Os4678	A2J10_10T0081100.2	Os11580	A2J10_10T0088900.4	0.999637	1.97575e-07	1
314	Os5819	A2J10_07T0160600.1	Os11589	A2J10_04T0122000.1	0.999729	1.10239e-07	1
315	Os4678	A2J10_10T0081100.2	Os11591	MSTRG.1231.1	0.99945	4.54114e-07	1
316	Os5819	A2J10_07T0160600.1	Os11608	A2J10_02T0256200.2	0.999631	2.04507e-07	1
317	Os10625	A2J10_06T0007400.1	Os11608	A2J10_02T0256200.2	0.999233	8.81146e-07	1
318	Os9851	A2J10_11T0031200.1	Os11623	A2J10_01T0335100.1	0.999381	5.74405e-07	1
319	Os4678	A2J10_10T0081100.2	Os11629	A2J10_08T0235300.1	0.999994	4.70379e-11	1
320	Os4678	A2J10_10T0081100.2	Os11651	MSTRG.25381.2	0.999986	2.89424e-10	1
321	Os4678	A2J10_10T0081100.2	Os11693	MSTRG.11980.15	0.999986	3.04173e-10	1
322	Os4678	A2J10_10T0081100.2	Os11700	A2J10_07T0188100.1	0.999688	1.45704e-07	1
323	Os10625	A2J10_06T0007400.1	Os11703	MSTRG.1928.1	0.999375	5.86727e-07	1
324	Os5819	A2J10_07T0160600.1	Os11738	A2J10_03T0244100.2	0.999717	1.20272e-07	1
325	Os10625	A2J10_06T0007400.1	Os11742	A2J10_01T0253200.1	0.999195	9.71628e-07	1
326	Os4678	A2J10_10T0081100.2	Os11751	A2J10_05T0109800.1	0.999709	1.26579e-07	1
327	Os4678	A2J10_10T0081100.2	Os11787	A2J10_07T0156200.1	0.999877	2.28526e-08	1
328	Os4678	A2J10_10T0081100.2	Os11803	A2J10_09T0050800.6	0.999741	1.00777e-07	1
329	Os4678	A2J10_10T0081100.2	Os11823	A2J10_01T0201400.3	0.999998	3.42082e-12	1
330	Os4678	A2J10_10T0081100.2	Os11862	A2J10_08T0067900.1	0.999996	1.86824e-11	1
331	Os5819	A2J10_07T0160600.1	Os11864	A2J10_02T0236500.2	0.999414	5.15414e-07	1
332	Os4678	A2J10_10T0081100.2	Os11869	A2J10_02T0192900.1	0.999996	1.85421e-11	1
333	Os5819	A2J10_07T0160600.1	Os11903	A2J10_06T0259800.1	0.999846	3.56903e-08	1
334	Os4678	A2J10_10T0081100.2	Os11911	A2J10_01T0125000.3	0.999667	1.65899e-07	1
335	Os4678	A2J10_10T0081100.2	Os11914	A2J10_03T0017900.1	0.999612	2.25891e-07	1
336	Os4678	A2J10_10T0081100.2	Os11916	A2J10_01T0106900.1	0.999679	1.54732e-07	1
337	Os4678	A2J10_10T0081100.2	Os11917	A2J10_06T0223900.1	0.999917	1.03889e-08	1
338	Os4678	A2J10_10T0081100.2	Os11930	A2J10_06T0289600.1	0.999943	4.90136e-09	1
339	Os4678	A2J10_10T0081100.2	Os11947	A2J10_04T0047700.1	0.999745	9.79011e-08	1
340	Os4678	A2J10_10T0081100.2	Os11977	A2J10_05T0229300.2	0.999636	1.99037e-07	1
341	Os5819	A2J10_07T0160600.1	Os11993	A2J10_08T0201500.1	0.999541	3.15651e-07	1
342	Os4678	A2J10_10T0081100.2	Os12003	A2J10_05T0148100.1	0.999999	1.00409e-12	1
343	Os9851	A2J10_11T0031200.1	Os12004	A2J10_04T0273700.1	0.9997	1.34945e-07	1
344	Os10625	A2J10_06T0007400.1	Os12011	MSTRG.591.1	0.999536	3.22663e-07	1
345	Os4678	A2J10_10T0081100.2	Os12025	A2J10_04T0248200.2	0.999436	4.77628e-07	1
346	Os10625	A2J10_06T0007400.1	Os12026	A2J10_02T0350600.4	0.999448	4.57062e-07	1
347	Os4678	A2J10_10T0081100.2	Os12053	A2J10_08T0173900.6	0.999895	1.63834e-08	1
348	Os4678	A2J10_10T0081100.2	Os12079	MSTRG.1233.1	0.999696	1.38659e-07	1
349	Os10625	A2J10_06T0007400.1	Os12088	A2J10_02T0310700.2	0.999429	4.89597e-07	1
350	Os4678	A2J10_10T0081100.2	Os12090	MSTRG.1941.2	0.999209	9.3724e-07	1
351	Os4678	A2J10_10T0081100.2	Os12102	A2J10_03T0275100.1	0.999483	4.01283e-07	1
352	Os12048	A2J10_03T0194000.2	Os12115	MSTRG.20557.1	0.999787	6.82702e-08	1
353	Os9851	A2J10_11T0031200.1	Os12124	MSTRG.1101.1	0.999364	6.06087e-07	1
354	Os4678	A2J10_10T0081100.2	Os12162	A2J10_07T0077200.1	0.999323	6.87709e-07	1
355	Os4678	A2J10_10T0081100.2	Os12185	A2J10_05T0010000.1	0.999995	3.91105e-11	1
356	Os4678	A2J10_10T0081100.2	Os12192	A2J10_12T0099800.1	0.999476	4.11497e-07	1
357	Os4678	A2J10_10T0081100.2	Os12198	A2J10_11T0071300.1	0.999703	1.31857e-07	1
358	Os4678	A2J10_10T0081100.2	Os12216	A2J10_07T0128700.1	0.999779	7.3545e-08	1
359	Os4678	A2J10_10T0081100.2	Os12250	A2J10_02T0047700.1	0.999728	1.10677e-07	1
360	Os4678	A2J10_10T0081100.2	Os12282	A2J10_02T0288500.1	0.999865	2.73836e-08	1
361	Os4678	A2J10_10T0081100.2	Os12311	A2J10_05T0241700.1	0.999817	5.02151e-08	1
362	Os4678	A2J10_10T0081100.2	Os12322	A2J10_02T0078900.1	0.999314	7.05358e-07	1
363	Os4678	A2J10_10T0081100.2	Os12346	A2J10_03T0132000.1	0.999905	1.34056e-08	1
364	Os4678	A2J10_10T0081100.2	Os12358	A2J10_09T0076400.1	0.999997	1.29585e-11	1
365	Os4678	A2J10_10T0081100.2	Os12367	A2J10_04T0185800.1	0.999467	4.25375e-07	1
366	Os5819	A2J10_07T0160600.1	Os12367	A2J10_04T0185800.1	0.999335	6.62246e-07	1
367	Os4678	A2J10_10T0081100.2	Os12381	A2J10_12T0162600.2	0.999816	5.06674e-08	1
368	Os4678	A2J10_10T0081100.2	Os12391	A2J10_01T0440200.1	0.999998	6.59539e-12	1
369	Os4678	A2J10_10T0081100.2	Os12407	MSTRG.12147.2	0.999958	2.61615e-09	1
370	Os4678	A2J10_10T0081100.2	Os12408	A2J10_05T0171500.1	0.999243	8.58931e-07	1
371	Os4678	A2J10_10T0081100.2	Os12447	A2J10_01T0496200.1	0.99996	2.34047e-09	1
372	Os12145	A2J10_10T0161400.1	Os12468	MSTRG.7492.1	0.999525	3.3834e-07	1
373	Os5819	A2J10_07T0160600.1	Os12507	A2J10_01T0467700.1	0.999744	9.82437e-08	1
374	Os4678	A2J10_10T0081100.2	Os12530	A2J10_06T0062600.1	0.999697	1.37268e-07	1
375	Os4678	A2J10_10T0081100.2	Os12547	MSTRG.2119.2	0.999371	5.93854e-07	1
376	Os4678	A2J10_10T0081100.2	Os12571	A2J10_03T0198100.1	0.999999	1.74105e-12	1
377	Os4678	A2J10_10T0081100.2	Os12582	A2J10_11T0203600.1	0.999564	2.85397e-07	1
378	Os4678	A2J10_10T0081100.2	Os12583	A2J10_01T0306300.1	0.999442	4.67389e-07	1
379	Os4678	A2J10_10T0081100.2	Os12587	A2J10_03T0114500.2	0.999553	3.00016e-07	1
380	Os4678	A2J10_10T0081100.2	Os12652	A2J10_02T0306100.1	0.999994	5.95071e-11	1
381	Os4678	A2J10_10T0081100.2	Os12666	MSTRG.5586.1	0.999654	1.79489e-07	1
382	Os4678	A2J10_10T0081100.2	Os12668	A2J10_03T0060400.1	0.999702	1.33229e-07	1
383	Os12145	A2J10_10T0161400.1	Os12670	MSTRG.13126.2	0.999525	3.37702e-07	1
384	Os4678	A2J10_10T0081100.2	Os12672	MSTRG.7900.3	0.999999	2.32925e-12	1
385	Os4678	A2J10_10T0081100.2	Os12706	A2J10_07T0105100.1	0.999856	3.09167e-08	1
386	Os4678	A2J10_10T0081100.2	Os12710	MSTRG.20034.1	0.999855	3.14169e-08	1
387	Os4678	A2J10_10T0081100.2	Os12716	A2J10_04T0121500.4	0.99974	1.01069e-07	1
388	Os10625	A2J10_06T0007400.1	Os12717	A2J10_01T0102100.1	0.999347	6.39616e-07	1
389	Os4678	A2J10_10T0081100.2	Os12718	A2J10_05T0205600.1	0.999997	1.54827e-11	1
390	Os4678	A2J10_10T0081100.2	Os12725	A2J10_08T0194800.3	0.999458	4.40277e-07	1
391	Os4678	A2J10_10T0081100.2	Os12750	A2J10_04T0115700.1	0.999573	2.73258e-07	1
392	Os4678	A2J10_10T0081100.2	Os12762	A2J10_01T0211100.2	0.999223	9.0588e-07	1
393	Os5819	A2J10_07T0160600.1	Os12785	MSTRG.22534.5	0.999504	3.68572e-07	1
394	Os5819	A2J10_07T0160600.1	Os12823	A2J10_02T0319200.1	0.999676	1.5778e-07	1
395	Os4678	A2J10_10T0081100.2	Os12856	A2J10_02T0296100.1	0.999232	8.85598e-07	1
396	Os4678	A2J10_10T0081100.2	Os12860	A2J10_10T0023000.1	0.999598	2.42974e-07	1
397	Os4678	A2J10_10T0081100.2	Os12877	A2J10_08T0109800.2	0.99941	5.21247e-07	1
398	Os5819	A2J10_07T0160600.1	Os12877	A2J10_08T0109800.2	0.999418	5.07919e-07	1
399	Os4678	A2J10_10T0081100.2	Os12909	A2J10_05T0125000.1	0.999828	4.41831e-08	1
400	Os4678	A2J10_10T0081100.2	Os12910	A2J10_03T0397400.1	0.999479	4.06982e-07	1
401	Os4678	A2J10_10T0081100.2	Os12914	A2J10_02T0395100.1	0.999999	1.24323e-12	1
402	Os12472	A2J10_07T0173700.1	Os12962	A2J10_07T0163900.1	0.999604	2.35163e-07	1
403	Os4678	A2J10_10T0081100.2	Os12973	A2J10_02T0094400.1	0.999901	1.46576e-08	1
404	Os9851	A2J10_11T0031200.1	Os12989	MSTRG.11539.1	0.99931	7.14506e-07	1
405	Os4678	A2J10_10T0081100.2	Os12995	A2J10_02T0015300.1	0.999382	5.73084e-07	1
406	Os4678	A2J10_10T0081100.2	Os12999	A2J10_12T0076900.1	0.999656	1.77645e-07	1
407	Os5819	A2J10_07T0160600.1	Os12999	A2J10_12T0076900.1	0.999293	7.48782e-07	1
408	Os4678	A2J10_10T0081100.2	Os13011	A2J10_04T0187500.2	0.999803	5.83622e-08	1
409	Os4678	A2J10_10T0081100.2	Os13022	A2J10_09T0085500.1	0.99973	1.09658e-07	1
410	Os4678	A2J10_10T0081100.2	Os13031	A2J10_06T0171700.3	0.999982	4.87089e-10	1
411	Os4678	A2J10_10T0081100.2	Os13036	A2J10_06T0059900.1	0.999958	2.64521e-09	1
412	Os4678	A2J10_10T0081100.2	Os13049	A2J10_01T0004600.1	0.9995	3.74221e-07	1
413	Os4678	A2J10_10T0081100.2	Os13079	A2J10_07T0101400.1	0.999998	5.2669e-12	1
414	Os4678	A2J10_10T0081100.2	Os13104	A2J10_05T0027400.1	0.999659	1.73999e-07	1
415	Os4678	A2J10_10T0081100.2	Os13123	MSTRG.358.2	0.999417	5.10384e-07	1
416	Os4678	A2J10_10T0081100.2	Os13128	A2J10_07T0187900.1	0.999368	5.98177e-07	1
417	Os4678	A2J10_10T0081100.2	Os13129	A2J10_01T0267000.1	0.999981	5.67097e-10	1
418	Os4678	A2J10_10T0081100.2	Os13143	A2J10_04T0259400.1	0.999906	1.31712e-08	1
419	Os5819	A2J10_07T0160600.1	Os13170	A2J10_02T0016600.1	0.99942	5.04794e-07	1
420	Os4678	A2J10_10T0081100.2	Os13182	MSTRG.10223.4	0.999332	6.68737e-07	1
421	Os4678	A2J10_10T0081100.2	Os13217	A2J10_02T0419000.1	0.999988	2.11096e-10	1
422	Os4678	A2J10_10T0081100.2	Os13257	A2J10_02T0372700.1	0.999812	5.29072e-08	1
423	Os4678	A2J10_10T0081100.2	Os13261	A2J10_04T0096700.1	0.999414	5.15135e-07	1
424	Os4678	A2J10_10T0081100.2	Os13278	A2J10_01T0195600.1	0.999922	9.06898e-09	1
425	Os4678	A2J10_10T0081100.2	Os13298	MSTRG.17286.4	0.999954	3.23295e-09	1
426	Os4678	A2J10_10T0081100.2	Os13316	A2J10_11T0033900.1	0.999999	2.31237e-12	1
427	Os4678	A2J10_10T0081100.2	Os13326	MSTRG.20838.6	0.999565	2.84017e-07	1
428	Os4678	A2J10_10T0081100.2	Os13337	MSTRG.19699.1	0.99977	7.94184e-08	1
429	Os4678	A2J10_10T0081100.2	Os13355	A2J10_08T0013000.1	0.999997	1.47136e-11	1
430	Os4678	A2J10_10T0081100.2	Os13360	A2J10_12T0058000.1	0.999994	5.07945e-11	1
431	Os4678	A2J10_10T0081100.2	Os13369	A2J10_05T0244700.1	0.999895	1.66728e-08	1
432	Os4678	A2J10_10T0081100.2	Os13377	MSTRG.18988.6	0.999882	2.08856e-08	1
433	Os4678	A2J10_10T0081100.2	Os13383	A2J10_05T0187900.1	0.999591	2.50755e-07	1
434	Os5819	A2J10_07T0160600.1	Os13386	A2J10_02T0004400.1	0.999592	2.50215e-07	1
435	Os4678	A2J10_10T0081100.2	Os13388	A2J10_06T0030500.1	0.999294	7.48214e-07	1
436	Os4678	A2J10_10T0081100.2	Os13406	A2J10_02T0134300.1	0.999522	3.43158e-07	1
437	Os5819	A2J10_07T0160600.1	Os13416	A2J10_01T0359100.2	0.999463	4.32054e-07	1
438	Os4678	A2J10_10T0081100.2	Os13465	A2J10_08T0059600.1	0.999726	1.12961e-07	1
439	Os4678	A2J10_10T0081100.2	Os13482	MSTRG.816.1	0.999242	8.61044e-07	1
440	Os4678	A2J10_10T0081100.2	Os13486	MSTRG.10016.7	0.999908	1.26735e-08	1
441	Os4678	A2J10_10T0081100.2	Os13495	A2J10_12T0001900.1	0.999998	4.04321e-12	1
442	Os4678	A2J10_10T0081100.2	Os13516	A2J10_08T0197300.1	0.999831	4.27681e-08	1
443	Os5819	A2J10_07T0160600.1	Os13517	A2J10_10T0083200.4	0.999669	1.64809e-07	1
444	Os4678	A2J10_10T0081100.2	Os13519	A2J10_04T0064700.1	0.999238	8.71113e-07	1
445	Os4678	A2J10_10T0081100.2	Os13551	A2J10_04T0175900.1	0.999999	1.66933e-12	1
446	Os4678	A2J10_10T0081100.2	Os13567	A2J10_04T0168300.4	0.999841	3.81282e-08	1
447	Os4678	A2J10_10T0081100.2	Os13596	A2J10_06T0172800.1	0.999356	6.21541e-07	1
448	Os223	A2J10_01T0100800.1	Os13597	MSTRG.17167.4	0.999271	7.97769e-07	1
449	Os4678	A2J10_10T0081100.2	Os13599	A2J10_01T0104300.1	1	1.29896e-13	1
450	Os4678	A2J10_10T0081100.2	Os13619	A2J10_01T0333500.1	1	3.62821e-13	1
451	Os4678	A2J10_10T0081100.2	Os13637	A2J10_01T0397400.4	0.999994	5.74012e-11	1
452	Os4678	A2J10_10T0081100.2	Os13698	A2J10_02T0188300.3	0.999971	1.25168e-09	1
453	Os4678	A2J10_10T0081100.2	Os13723	MSTRG.87.1	0.999598	2.42592e-07	1
454	Os4678	A2J10_10T0081100.2	Os13747	A2J10_08T0173300.1	0.999583	2.61162e-07	1
455	Os4678	A2J10_10T0081100.2	Os13758	A2J10_02T0322900.3	0.999315	7.04492e-07	1
456	Os4678	A2J10_10T0081100.2	Os13764	A2J10_07T0073600.1	0.999613	2.24331e-07	1
457	Os4678	A2J10_10T0081100.2	Os13774	A2J10_09T0029700.1	0.999997	1.08358e-11	1
458	Os10625	A2J10_06T0007400.1	Os13779	A2J10_04T0265400.1	0.999189	9.86501e-07	1
459	Os4678	A2J10_10T0081100.2	Os13807	A2J10_03T0091800.1	0.999997	1.76561e-11	1
460	Os1498	A2J10_12T0034900.1	Os13832	A2J10_10T0158500.1	0.999803	5.82662e-08	1
461	Os4678	A2J10_10T0081100.2	Os13847	A2J10_05T0124200.1	0.999541	3.15997e-07	1
462	Os4678	A2J10_10T0081100.2	Os13876	MSTRG.22138.6	0.99999	1.37092e-10	1
463	Os1034	A2J10_01T0218700.1	Os13894	MSTRG.8786.5	0.999434	4.80086e-07	1
464	Os4678	A2J10_10T0081100.2	Os13935	A2J10_08T0174200.3	0.999409	5.24297e-07	1
465	Os4678	A2J10_10T0081100.2	Os13943	A2J10_06T0033800.1	0.999541	3.15582e-07	1
466	Os4678	A2J10_10T0081100.2	Os13961	MSTRG.9939.4	0.99945	4.54297e-07	1
467	Os4678	A2J10_10T0081100.2	Os13977	A2J10_04T0109800.1	0.999795	6.27864e-08	1
468	Os4678	A2J10_10T0081100.2	Os13995	A2J10_03T0043900.1	0.999864	2.78659e-08	1
469	Os4678	A2J10_10T0081100.2	Os14016	MSTRG.6534.8	0.999669	1.63883e-07	1
470	Os4678	A2J10_10T0081100.2	Os14036	MSTRG.19573.4	0.999896	1.63735e-08	1
471	Os4678	A2J10_10T0081100.2	Os14064	MSTRG.4875.7	0.999689	1.45351e-07	1
472	Os12472	A2J10_07T0173700.1	Os14074	A2J10_06T0119800.1	0.999329	6.75206e-07	1
473	Os4678	A2J10_10T0081100.2	Os14120	A2J10_07T0152300.1	0.999999	7.13207e-13	1
474	Os4678	A2J10_10T0081100.2	Os14155	A2J10_07T0021900.1	0.999999	1.09934e-12	1
475	Os10625	A2J10_06T0007400.1	Os14167	A2J10_06T0152800.5	0.999273	7.9199e-07	1
476	Os1034	A2J10_01T0218700.1	Os14195	MSTRG.26154.1	0.999214	9.2549e-07	1
477	Os4678	A2J10_10T0081100.2	Os14227	A2J10_06T0157200.1	0.999353	6.27757e-07	1
478	Os4678	A2J10_10T0081100.2	Os14253	MSTRG.11801.1	0.999907	1.29879e-08	1
479	Os4678	A2J10_10T0081100.2	Os14285	A2J10_06T0159300.1	0.999255	8.32766e-07	1
480	Os4678	A2J10_10T0081100.2	Os14289	A2J10_01T0418700.1	0.999586	2.56475e-07	1
481	Os7532	A2J10_11T0161900.1	Os14314	A2J10_03T0136900.1	0.999778	7.37825e-08	1
482	Os4678	A2J10_10T0081100.2	Os14322	A2J10_03T0396400.2	0.999443	4.65162e-07	1
483	Os5819	A2J10_07T0160600.1	Os14340	A2J10_08T0018700.2	0.99966	1.73792e-07	1
484	Os4678	A2J10_10T0081100.2	Os14363	MSTRG.13845.1	0.999529	3.32912e-07	1
485	Os4678	A2J10_10T0081100.2	Os14402	A2J10_02T0012900.1	0.999986	2.73928e-10	1
486	Os4678	A2J10_10T0081100.2	Os14416	A2J10_08T0104500.1	0.999912	1.16009e-08	1
487	Os4678	A2J10_10T0081100.2	Os14437	A2J10_01T0377800.1	0.999643	1.91636e-07	1
488	Os4678	A2J10_10T0081100.2	Os14463	A2J10_01T0440300.1	0.999946	4.29486e-09	1
489	Os5456	A2J10_12T0138700.1	Os14500	MSTRG.15164.1	0.999467	4.25867e-07	1
490	Os5456	A2J10_12T0138700.1	Os14513	MSTRG.15934.1	0.999429	4.89702e-07	1
491	Os5428	A2J10_06T0217600.1	Os14553	A2J10_03T0064400.1	0.999517	3.49909e-07	1
492	Os7486	A2J10_05T0260600.1	Os14568	A2J10_03T0176100.1	0.999523	3.41627e-07	1
493	Os4223	MSTRG.21588.1	Os14573	MSTRG.14545.3	0.999259	8.24401e-07	1
494	Os5428	A2J10_06T0217600.1	Os14582	MSTRG.11610.2	0.999918	1.01169e-08	1
495	Os9851	A2J10_11T0031200.1	Os14589	MSTRG.19324.2	0.999345	6.4316e-07	1
496	Os4678	A2J10_10T0081100.2	Os14627	A2J10_08T0149400.1	0.999456	4.43545e-07	1
497	Os5456	A2J10_12T0138700.1	Os14654	A2J10_06T0196800.1	0.999948	4.12972e-09	1
498	Os5428	A2J10_06T0217600.1	Os14667	MSTRG.3649.2	0.999594	2.47173e-07	1
499	Os4678	A2J10_10T0081100.2	Os14709	MSTRG.26807.3	0.999439	4.72701e-07	1
500	Os3425	MSTRG.19958.1	Os14720	MSTRG.23546.11	0.999418	5.07213e-07	1
501	Os4678	A2J10_10T0081100.2	Os14734	A2J10_02T0328600.1	0.999474	4.15698e-07	1
502	Os7486	A2J10_05T0260600.1	Os14740	A2J10_02T0001900.1	0.999494	3.83596e-07	1
503	Os4678	A2J10_10T0081100.2	Os14805	A2J10_11T0108200.2	0.999585	2.57713e-07	1
504	Os5819	A2J10_07T0160600.1	Os14805	A2J10_11T0108200.2	0.999285	7.6649e-07	1
505	Os7797	A2J10_04T0285000.1	Os14819	MSTRG.16517.6	0.99936	6.14008e-07	1
506	Os4678	A2J10_10T0081100.2	Os14851	A2J10_04T0035200.2	0.99938	5.76431e-07	1
507	Os7486	A2J10_05T0260600.1	Os14852	A2J10_05T0143900.1	0.999553	3.00068e-07	1
508	Os5456	A2J10_12T0138700.1	Os14862	A2J10_02T0099800.1	0.999468	4.24612e-07	1
509	Os10625	A2J10_06T0007400.1	Os14869	A2J10_02T0088300.1	0.999258	8.25196e-07	1
510	Os5456	A2J10_12T0138700.1	Os14874	MSTRG.2275.3	0.999253	8.36504e-07	1
511	Os7532	A2J10_11T0161900.1	Os14902	MSTRG.17817.3	0.999279	7.79538e-07	1
512	Os5428	A2J10_06T0217600.1	Os14914	A2J10_12T0190900.1	0.99978	7.24633e-08	1
513	Os5428	A2J10_06T0217600.1	Os14921	MSTRG.9717.1	0.999666	1.67509e-07	1
514	Os5456	A2J10_12T0138700.1	Os14921	MSTRG.9717.1	0.999204	9.50781e-07	1
515	Os4678	A2J10_10T0081100.2	Os14935	MSTRG.92.4	0.999994	5.72657e-11	1
516	Os4678	A2J10_10T0081100.2	Os14953	A2J10_04T0199700.3	0.999762	8.50514e-08	1
517	Os4678	A2J10_10T0081100.2	Os14960	A2J10_01T0251200.1	0.999971	1.29845e-09	1
518	Os5819	A2J10_07T0160600.1	Os14977	A2J10_04T0263300.1	0.999449	4.54881e-07	1
519	Os4678	A2J10_10T0081100.2	Os15007	A2J10_03T0346300.1	0.999985	3.52073e-10	1
520	Os14883	A2J10_01T0108200.1	Os15010	A2J10_04T0253600.1	0.999781	7.21646e-08	1
521	Os4678	A2J10_10T0081100.2	Os15017	A2J10_03T0341200.1	0.999382	5.72956e-07	1
522	Os4678	A2J10_10T0081100.2	Os15025	A2J10_08T0231100.3	0.999456	4.44065e-07	1
523	Os4678	A2J10_10T0081100.2	Os15058	A2J10_09T0097800.8	0.999868	2.61981e-08	1
524	Os4678	A2J10_10T0081100.2	Os15109	A2J10_02T0143200.1	0.999321	6.91238e-07	1
525	Os5819	A2J10_07T0160600.1	Os15109	A2J10_02T0143200.1	0.999373	5.90136e-07	1
526	Os7532	A2J10_11T0161900.1	Os15112	A2J10_06T0220900.2	0.999384	5.68579e-07	1
527	Os5819	A2J10_07T0160600.1	Os15134	A2J10_07T0285700.1	0.999264	8.11408e-07	1
528	Os7797	A2J10_04T0285000.1	Os15151	A2J10_06T0047100.1	0.999583	2.61171e-07	1
529	Os10625	A2J10_06T0007400.1	Os15168	A2J10_11T0215900.1	0.999676	1.574e-07	1
530	Os8836	A2J10_03T0320600.1	Os15194	MSTRG.823.2	0.999332	6.69111e-07	1
531	Os4678	A2J10_10T0081100.2	Os15200	A2J10_07T0050300.1	0.99989	1.8111e-08	1
532	Os4678	A2J10_10T0081100.2	Os15202	A2J10_02T0411500.1	0.999267	8.05114e-07	1
533	Os7797	A2J10_04T0285000.1	Os15208	MSTRG.17889.1	0.999966	1.68882e-09	1
534	Os5819	A2J10_07T0160600.1	Os15226	A2J10_05T0234300.1	0.999782	7.10283e-08	1
535	Os4678	A2J10_10T0081100.2	Os15250	A2J10_01T0445300.2	0.999916	1.06405e-08	1
536	Os5819	A2J10_07T0160600.1	Os15276	MSTRG.2807.6	0.999229	8.92169e-07	1
537	Os5456	A2J10_12T0138700.1	Os15336	A2J10_01T0058300.1	0.999204	9.49036e-07	1
538	Os4678	A2J10_10T0081100.2	Os15386	A2J10_04T0223200.1	0.999282	7.72794e-07	1
539	Os5819	A2J10_07T0160600.1	Os15386	A2J10_04T0223200.1	0.999269	8.00547e-07	1
540	Os4678	A2J10_10T0081100.2	Os15426	A2J10_12T0018100.1	0.999774	7.69278e-08	1
541	Os4678	A2J10_10T0081100.2	Os15444	A2J10_02T0243800.8	0.999602	2.37982e-07	1
542	Os4678	A2J10_10T0081100.2	Os15482	MSTRG.24643.1	0.999716	1.20703e-07	1
543	Os7797	A2J10_04T0285000.1	Os15489	MSTRG.12898.1	0.999563	2.86361e-07	1
544	Os5456	A2J10_12T0138700.1	Os15490	MSTRG.6447.1	0.999463	4.33223e-07	1
545	Os4678	A2J10_10T0081100.2	Os15491	A2J10_03T0334700.4	0.999258	8.25204e-07	1
546	Os9851	A2J10_11T0031200.1	Os15531	MSTRG.16446.1	0.999208	9.39657e-07	1
547	Os4678	A2J10_10T0081100.2	Os15538	A2J10_03T0116200.1	0.999583	2.60308e-07	1
548	Os8834	MSTRG.2026.1	Os15551	MSTRG.7031.1	0.999884	2.01201e-08	1
549	Os4678	A2J10_10T0081100.2	Os15627	MSTRG.3923.5	0.999765	8.25425e-08	1
550	Os4678	A2J10_10T0081100.2	Os15650	A2J10_02T0010000.1	0.999429	4.89005e-07	1
551	Os5819	A2J10_07T0160600.1	Os15650	A2J10_02T0010000.1	0.99948	4.05948e-07	1
552	Os4678	A2J10_10T0081100.2	Os15675	A2J10_03T0074000.1	0.999507	3.65043e-07	1
553	Os4678	A2J10_10T0081100.2	Os15688	A2J10_12T0055100.1	0.999993	7.76759e-11	1
554	Os4678	A2J10_10T0081100.2	Os15692	A2J10_10T0111900.2	0.999335	6.63996e-07	1
555	Os4678	A2J10_10T0081100.2	Os15719	A2J10_05T0145500.1	0.999928	7.6879e-09	1
556	Os4678	A2J10_10T0081100.2	Os15748	MSTRG.13259.1	0.999963	2.10916e-09	1
557	Os4678	A2J10_10T0081100.2	Os15778	A2J10_02T0047500.2	0.999823	4.71868e-08	1
558	Os7532	A2J10_11T0161900.1	Os15785	A2J10_04T0298500.1	0.999462	4.33559e-07	1
559	Os9527	A2J10_01T0074700.1	Os15790	MSTRG.11162.1	0.999339	6.55381e-07	1
560	Os9527	A2J10_01T0074700.1	Os15831	A2J10_08T0020900.1	0.999549	3.05162e-07	1
561	Os4678	A2J10_10T0081100.2	Os15835	A2J10_02T0223500.1	0.999734	1.06181e-07	1
562	Os5819	A2J10_07T0160600.1	Os15837	A2J10_01T0460700.1	0.99954	3.17473e-07	1
563	Os7532	A2J10_11T0161900.1	Os15838	A2J10_02T0151600.1	0.999504	3.68397e-07	1
564	Os4678	A2J10_10T0081100.2	Os15856	MSTRG.19785.7	0.999838	3.9411e-08	1
565	Os10466	A2J10_03T0148200.1	Os15873	MSTRG.15051.2	0.999634	2.00941e-07	1
566	Os4678	A2J10_10T0081100.2	Os15874	MSTRG.7104.6	0.999533	3.26406e-07	1
567	Os4678	A2J10_10T0081100.2	Os15924	A2J10_06T0043500.1	0.999492	3.86736e-07	1
568	Os4678	A2J10_10T0081100.2	Os15997	A2J10_10T0151700.1	0.999725	1.13608e-07	1
569	Os4678	A2J10_10T0081100.2	Os16031	A2J10_05T0099300.2	0.99919	9.84788e-07	1
570	Os4678	A2J10_10T0081100.2	Os16038	A2J10_01T0359200.2	0.999817	5.00681e-08	1
571	Os10625	A2J10_06T0007400.1	Os16047	A2J10_10T0092000.1	0.999281	7.75488e-07	1
572	Os4678	A2J10_10T0081100.2	Os16055	MSTRG.11525.5	0.999921	9.33153e-09	1
573	Os4678	A2J10_10T0081100.2	Os16072	MSTRG.14779.1	0.99945	4.53891e-07	1
574	Os5819	A2J10_07T0160600.1	Os16072	MSTRG.14779.1	0.999204	9.51052e-07	1
575	Os4678	A2J10_10T0081100.2	Os16115	A2J10_01T0118100.1	0.999756	8.92712e-08	1
576	Os4678	A2J10_10T0081100.2	Os16132	MSTRG.23872.1	0.999581	2.62713e-07	1
577	Os4678	A2J10_10T0081100.2	Os16188	A2J10_07T0215300.5	0.999896	1.61793e-08	1
578	Os4678	A2J10_10T0081100.2	Os16210	A2J10_02T0315400.1	0.999432	4.84327e-07	1
579	Os9851	A2J10_11T0031200.1	Os16213	MSTRG.24587.1	0.99959	2.52383e-07	1
580	Os5819	A2J10_07T0160600.1	Os16226	A2J10_07T0220800.2	0.999209	9.38368e-07	1
581	Os4678	A2J10_10T0081100.2	Os16227	A2J10_01T0306500.1	0.999211	9.3329e-07	1
582	Os5819	A2J10_07T0160600.1	Os16231	MSTRG.24489.1	0.999569	2.78173e-07	1
583	Os10625	A2J10_06T0007400.1	Os16231	MSTRG.24489.1	0.99935	6.33356e-07	1
584	Os4678	A2J10_10T0081100.2	Os16239	A2J10_07T0105000.1	0.999916	1.04915e-08	1
585	Os4678	A2J10_10T0081100.2	Os16240	A2J10_09T0092900.1	0.999778	7.39824e-08	1
586	Os10625	A2J10_06T0007400.1	Os16277	MSTRG.15672.4	0.999565	2.83214e-07	1
587	Os4678	A2J10_10T0081100.2	Os16284	A2J10_08T0168600.3	0.999818	4.95991e-08	1
588	Os4678	A2J10_10T0081100.2	Os16298	MSTRG.11980.14	0.999977	8.01216e-10	1
589	Os4678	A2J10_10T0081100.2	Os16300	A2J10_03T0136600.1	0.999658	1.75543e-07	1
590	Os12048	A2J10_03T0194000.2	Os16352	MSTRG.25087.1	0.999723	1.15313e-07	1
591	Os4678	A2J10_10T0081100.2	Os16375	MSTRG.5951.3	0.999794	6.35906e-08	1
592	Os4678	A2J10_10T0081100.2	Os16378	MSTRG.2821.1	0.999999	8.45102e-13	1
593	Os12048	A2J10_03T0194000.2	Os16386	MSTRG.7398.1	0.999852	3.30305e-08	1
594	Os4678	A2J10_10T0081100.2	Os16395	MSTRG.2909.1	0.999895	1.65574e-08	1
595	Os4678	A2J10_10T0081100.2	Os16405	A2J10_02T0362900.1	0.999465	4.29557e-07	1
596	Os4678	A2J10_10T0081100.2	Os16411	MSTRG.25083.3	0.999205	9.48734e-07	1
597	Os10625	A2J10_06T0007400.1	Os16427	MSTRG.7032.1	0.999603	2.3673e-07	1
598	Os4678	A2J10_10T0081100.2	Os16447	A2J10_04T0153100.1	0.999969	1.40162e-09	1
599	Os4678	A2J10_10T0081100.2	Os16468	MSTRG.5553.3	0.999357	6.20154e-07	1
600	Os4678	A2J10_10T0081100.2	Os16484	A2J10_01T0341200.1	0.999518	3.48698e-07	1
601	Os4678	A2J10_10T0081100.2	Os16486	A2J10_01T0051000.2	0.999999	3.30891e-12	1
602	Os4678	A2J10_10T0081100.2	Os16489	A2J10_02T0293900.1	0.999926	8.18968e-09	1
603	Os4678	A2J10_10T0081100.2	Os16493	A2J10_08T0054000.2	0.999361	6.11991e-07	1
604	Os4678	A2J10_10T0081100.2	Os16500	A2J10_05T0024300.1	0.999999	1.26388e-12	1
605	Os4678	A2J10_10T0081100.2	Os16518	A2J10_03T0349100.3	0.999744	9.85123e-08	1
606	Os4678	A2J10_10T0081100.2	Os16552	MSTRG.16549.9	0.999277	7.83321e-07	1
607	Os4678	A2J10_10T0081100.2	Os16571	A2J10_03T0068600.4	0.99939	5.58555e-07	1
608	Os4678	A2J10_10T0081100.2	Os16624	A2J10_04T0207400.4	0.999504	3.69509e-07	1
609	Os4678	A2J10_10T0081100.2	Os16644	MSTRG.18488.3	0.999639	1.9528e-07	1
610	Os4678	A2J10_10T0081100.2	Os16649	A2J10_08T0035200.3	0.999925	8.52484e-09	1
611	Os4678	A2J10_10T0081100.2	Os16665	A2J10_02T0394300.1	0.999465	4.28885e-07	1
612	Os4678	A2J10_10T0081100.2	Os16724	A2J10_02T0071500.2	0.999627	2.08277e-07	1
613	Os4678	A2J10_10T0081100.2	Os16732	A2J10_11T0080800.1	0.999593	2.48031e-07	1
614	Os4678	A2J10_10T0081100.2	Os16746	A2J10_08T0047600.1	0.999254	8.34546e-07	1
615	Os4678	A2J10_10T0081100.2	Os16752	A2J10_02T0386500.1	0.999708	1.27824e-07	1
616	Os4678	A2J10_10T0081100.2	Os16761	A2J10_04T0110500.2	0.999713	1.23154e-07	1
617	Os5819	A2J10_07T0160600.1	Os16761	A2J10_04T0110500.2	0.999232	8.85369e-07	1
618	Os4678	A2J10_10T0081100.2	Os16773	A2J10_08T0148100.1	0.999269	8.02176e-07	1
619	Os4678	A2J10_10T0081100.2	Os16780	A2J10_11T0046600.2	0.999826	4.54595e-08	1
620	Os4678	A2J10_10T0081100.2	Os16816	MSTRG.24290.2	0.999517	3.50435e-07	1
621	Os4678	A2J10_10T0081100.2	Os16844	MSTRG.16636.2	0.999871	2.49978e-08	1
622	Os4678	A2J10_10T0081100.2	Os16855	A2J10_11T0187900.1	0.999983	4.12517e-10	1
623	Os4678	A2J10_10T0081100.2	Os16857	A2J10_02T0009500.1	0.999909	1.2556e-08	1
624	Os12145	A2J10_10T0161400.1	Os16864	MSTRG.18293.2	0.9996	2.39946e-07	1
625	Os4678	A2J10_10T0081100.2	Os16867	A2J10_08T0213400.1	0.999654	1.79374e-07	1
626	Os4678	A2J10_10T0081100.2	Os16871	MSTRG.6672.3	0.999818	4.97525e-08	1
627	Os4678	A2J10_10T0081100.2	Os16890	MSTRG.13004.7	0.999698	1.36742e-07	1
628	Os10625	A2J10_06T0007400.1	Os16895	MSTRG.117.1	0.999418	5.08841e-07	1
629	Os5819	A2J10_07T0160600.1	Os16909	MSTRG.343.1	0.999464	4.30985e-07	1
630	Os5819	A2J10_07T0160600.1	Os16916	A2J10_01T0051900.1	0.999684	1.50121e-07	1
631	Os4678	A2J10_10T0081100.2	Os16919	A2J10_01T0053100.1	0.999949	3.9004e-09	1
632	Os4678	A2J10_10T0081100.2	Os16922	A2J10_01T0054700.2	0.999539	3.18282e-07	1
633	Os5819	A2J10_07T0160600.1	Os16922	A2J10_01T0054700.2	0.999187	9.91735e-07	1
634	Os4678	A2J10_10T0081100.2	Os16930	A2J10_01T0069300.1	0.999713	1.23394e-07	1
635	Os5819	A2J10_07T0160600.1	Os16932	A2J10_01T0071200.1	0.999204	9.50089e-07	1
636	Os4678	A2J10_10T0081100.2	Os16933	A2J10_01T0076300.1	0.999984	3.96474e-10	1
637	Os4678	A2J10_10T0081100.2	Os16938	A2J10_01T0081300.1	0.999613	2.24525e-07	1
638	Os5819	A2J10_07T0160600.1	Os16938	A2J10_01T0081300.1	0.999422	5.01763e-07	1
639	Os3466	A2J10_03T0360200.1	Os16939	A2J10_01T0081600.1	0.999692	1.41982e-07	1
640	Os4678	A2J10_10T0081100.2	Os16940	A2J10_01T0082100.1	0.999364	6.07469e-07	1
641	Os5819	A2J10_07T0160600.1	Os16948	A2J10_01T0090900.1	0.999564	2.84657e-07	1
642	Os4678	A2J10_10T0081100.2	Os16950	A2J10_01T0099100.1	0.999766	8.20463e-08	1
643	Os5819	A2J10_07T0160600.1	Os16951	A2J10_01T0105500.1	0.999273	7.93687e-07	1
644	Os10625	A2J10_06T0007400.1	Os16951	A2J10_01T0105500.1	0.999254	8.33686e-07	1
645	Os4678	A2J10_10T0081100.2	Os16953	A2J10_01T0107100.1	0.999407	5.27464e-07	1
646	Os4678	A2J10_10T0081100.2	Os16959	A2J10_01T0113900.1	0.999762	8.51288e-08	1
647	Os4678	A2J10_10T0081100.2	Os16966	MSTRG.1079.4	0.99971	1.25902e-07	1
648	Os4678	A2J10_10T0081100.2	Os16997	A2J10_01T0215600.2	0.999912	1.16277e-08	1
649	Os3499	A2J10_02T0361400.1	Os17020	A2J10_01T0286000.1	0.999381	5.75537e-07	1
650	Os4678	A2J10_10T0081100.2	Os17022	MSTRG.2177.1	0.999746	9.70198e-08	1
651	Os4678	A2J10_10T0081100.2	Os17035	MSTRG.2337.1	0.999188	9.8839e-07	1
652	Os4678	A2J10_10T0081100.2	Os17040	A2J10_01T0322000.1	0.999959	2.48309e-09	1
653	Os4678	A2J10_10T0081100.2	Os17042	MSTRG.2481.1	0.999439	4.71755e-07	1
654	Os5819	A2J10_07T0160600.1	Os17042	MSTRG.2481.1	0.999328	6.7689e-07	1
655	Os4678	A2J10_10T0081100.2	Os17043	A2J10_01T0328500.1	0.999412	5.18706e-07	1
656	Os5819	A2J10_07T0160600.1	Os17043	A2J10_01T0328500.1	0.999388	5.6247e-07	1
657	Os5819	A2J10_07T0160600.1	Os17064	MSTRG.2712.1	0.999281	7.75747e-07	1
658	Os5819	A2J10_07T0160600.1	Os17065	A2J10_01T0354400.2	0.999868	2.62977e-08	1
659	Os4678	A2J10_10T0081100.2	Os17068	A2J10_01T0360600.1	0.999328	6.77794e-07	1
660	Os4678	A2J10_10T0081100.2	Os17086	MSTRG.3042.1	0.999294	7.47147e-07	1
661	Os5819	A2J10_07T0160600.1	Os17086	MSTRG.3042.1	0.999363	6.09409e-07	1
662	Os4678	A2J10_10T0081100.2	Os17097	A2J10_01T0404300.1	0.999883	2.04004e-08	1
663	Os5819	A2J10_07T0160600.1	Os17102	A2J10_01T0408100.1	0.999821	4.79371e-08	1
664	Os4678	A2J10_10T0081100.2	Os17107	A2J10_01T0415100.2	0.999998	5.05285e-12	1
665	Os4678	A2J10_10T0081100.2	Os17110	A2J10_01T0419000.1	0.999989	1.78263e-10	1
666	Os4678	A2J10_10T0081100.2	Os17125	A2J10_01T0445200.1	0.999904	1.38783e-08	1
667	Os4678	A2J10_10T0081100.2	Os17127	A2J10_01T0450500.2	0.999947	4.1577e-09	1
668	Os5819	A2J10_07T0160600.1	Os17140	A2J10_01T0493900.1	0.999268	8.03628e-07	1
669	Os4678	A2J10_10T0081100.2	Os17141	A2J10_01T0494100.1	0.999743	9.93032e-08	1
670	Os4678	A2J10_10T0081100.2	Os17147	A2J10_10T0005800.1	0.999825	4.59584e-08	1
671	Os4678	A2J10_10T0081100.2	Os17151	MSTRG.4097.1	0.999903	1.41853e-08	1
672	Os10625	A2J10_06T0007400.1	Os17153	A2J10_10T0023900.1	0.999209	9.38454e-07	1
673	Os4678	A2J10_10T0081100.2	Os17156	MSTRG.4184.1	0.999788	6.72119e-08	1
674	Os4678	A2J10_10T0081100.2	Os17158	A2J10_10T0042400.1	0.999436	4.77306e-07	1
675	Os4678	A2J10_10T0081100.2	Os17159	A2J10_10T0042900.1	0.999374	5.87026e-07	1
676	Os4678	A2J10_10T0081100.2	Os17161	A2J10_10T0049900.1	0.999867	2.64793e-08	1
677	Os5819	A2J10_07T0160600.1	Os17165	A2J10_10T0067800.1	0.999706	1.29829e-07	1
678	Os223	A2J10_01T0100800.1	Os17169	A2J10_10T0080900.1	0.999272	7.95732e-07	1
679	Os4678	A2J10_10T0081100.2	Os17171	A2J10_10T0090900.2	0.999969	1.47225e-09	1
680	Os4678	A2J10_10T0081100.2	Os17182	A2J10_10T0129600.1	0.9998	5.98391e-08	1
681	Os5819	A2J10_07T0160600.1	Os17185	A2J10_10T0132300.1	0.999563	2.86516e-07	1
682	Os4678	A2J10_10T0081100.2	Os17195	A2J10_10T0153200.1	0.999994	4.93021e-11	1
683	Os4678	A2J10_10T0081100.2	Os17200	MSTRG.5082.1	0.999716	1.21008e-07	1
684	Os5819	A2J10_07T0160600.1	Os17212	A2J10_10T0186000.1	0.999189	9.85506e-07	1
685	Os4678	A2J10_10T0081100.2	Os17214	MSTRG.5334.11	0.999997	1.15641e-11	1
686	Os4678	A2J10_10T0081100.2	Os17219	A2J10_11T0020800.1	0.999947	4.26809e-09	1
687	Os4678	A2J10_10T0081100.2	Os17221	MSTRG.5525.1	0.999876	2.30282e-08	1
688	Os5819	A2J10_07T0160600.1	Os17222	A2J10_11T0028800.1	0.999318	6.96984e-07	1
689	Os4678	A2J10_10T0081100.2	Os17226	A2J10_11T0031600.1	0.999668	1.65706e-07	1
690	Os5819	A2J10_07T0160600.1	Os17227	MSTRG.5582.1	0.999718	1.18871e-07	1
691	Os5819	A2J10_07T0160600.1	Os17230	A2J10_11T0040800.2	0.999427	4.92199e-07	1
692	Os5819	A2J10_07T0160600.1	Os17233	A2J10_11T0046800.1	0.999329	6.75585e-07	1
693	Os4678	A2J10_10T0081100.2	Os17236	A2J10_11T0055500.1	0.9997	1.34992e-07	1
694	Os12472	A2J10_07T0173700.1	Os17239	MSTRG.5782.1	0.999765	8.31816e-08	1
695	Os5819	A2J10_07T0160600.1	Os17240	MSTRG.5802.1	0.999389	5.59051e-07	1
696	Os4678	A2J10_10T0081100.2	Os17244	A2J10_11T0075100.1	0.999926	8.31204e-09	1
697	Os4678	A2J10_10T0081100.2	Os17265	MSTRG.6176.1	0.999398	5.43983e-07	1
698	Os4678	A2J10_10T0081100.2	Os17266	A2J10_11T0117400.1	0.999607	2.31169e-07	1
699	Os5819	A2J10_07T0160600.1	Os17266	A2J10_11T0117400.1	0.99946	4.36688e-07	1
700	Os4678	A2J10_10T0081100.2	Os17267	A2J10_11T0117500.2	0.999876	2.32098e-08	1
701	Os4678	A2J10_10T0081100.2	Os17268	MSTRG.6211.1	0.999976	8.76119e-10	1
702	Os4678	A2J10_10T0081100.2	Os17276	A2J10_11T0141400.1	0.999985	3.45579e-10	1
703	Os5819	A2J10_07T0160600.1	Os17278	A2J10_11T0148700.1	0.999307	7.19551e-07	1
704	Os4678	A2J10_10T0081100.2	Os17279	A2J10_11T0149100.5	0.999953	3.27012e-09	1
705	Os4678	A2J10_10T0081100.2	Os17285	A2J10_11T0163000.1	0.999829	4.38435e-08	1
706	Os4678	A2J10_10T0081100.2	Os17294	MSTRG.6675.1	0.999897	1.59865e-08	1
707	Os5819	A2J10_07T0160600.1	Os17295	A2J10_11T0191700.1	0.999811	5.38454e-08	1
708	Os4678	A2J10_10T0081100.2	Os17296	A2J10_11T0200900.1	0.9998	5.99319e-08	1
709	Os4678	A2J10_10T0081100.2	Os17297	MSTRG.6798.2	0.999965	1.8656e-09	1
710	Os4678	A2J10_10T0081100.2	Os17301	MSTRG.6928.2	0.999914	1.11818e-08	1
711	Os4678	A2J10_10T0081100.2	Os17304	A2J10_11T0234200.1	0.99943	4.87432e-07	1
712	Os4678	A2J10_10T0081100.2	Os17305	A2J10_11T0237200.1	0.99923	8.88425e-07	1
713	Os4678	A2J10_10T0081100.2	Os17308	A2J10_12T0005600.1	0.99953	3.30876e-07	1
714	Os5819	A2J10_07T0160600.1	Os17313	A2J10_12T0021000.1	0.999326	6.8135e-07	1
715	Os4678	A2J10_10T0081100.2	Os17322	A2J10_12T0041500.1	0.999866	2.67924e-08	1
716	Os4678	A2J10_10T0081100.2	Os17325	MSTRG.7494.3	0.999863	2.82105e-08	1
717	Os4678	A2J10_10T0081100.2	Os17326	MSTRG.7521.1	0.999593	2.48152e-07	1
718	Os5819	A2J10_07T0160600.1	Os17326	MSTRG.7521.1	0.999438	4.73125e-07	1
719	Os4678	A2J10_10T0081100.2	Os17332	A2J10_12T0089200.1	0.999385	5.67706e-07	1
720	Os4678	A2J10_10T0081100.2	Os17336	A2J10_12T0096900.1	0.999827	4.49098e-08	1
721	Os5819	A2J10_07T0160600.1	Os17337	A2J10_12T0100500.1	0.999954	3.24296e-09	1
722	Os4678	A2J10_10T0081100.2	Os17340	A2J10_12T0110200.1	0.999314	7.06452e-07	1
723	Os4678	A2J10_10T0081100.2	Os17346	A2J10_12T0123000.1	0.999985	3.20763e-10	1
724	Os5819	A2J10_07T0160600.1	Os17354	A2J10_12T0145700.2	0.999648	1.855e-07	1
725	Os4678	A2J10_10T0081100.2	Os17358	MSTRG.8153.1	0.999319	6.94593e-07	1
726	Os4678	A2J10_10T0081100.2	Os17365	A2J10_12T0170800.1	0.999334	6.65552e-07	1
727	Os4678	A2J10_10T0081100.2	Os17371	A2J10_12T0184100.1	0.999215	9.24116e-07	1
728	Os4678	A2J10_10T0081100.2	Os17379	A2J10_02T0000500.1	0.999519	3.47109e-07	1
729	Os5819	A2J10_07T0160600.1	Os17379	A2J10_02T0000500.1	0.999303	7.2838e-07	1
730	Os4678	A2J10_10T0081100.2	Os17384	A2J10_02T0011400.1	0.999905	1.35754e-08	1
731	Os4678	A2J10_10T0081100.2	Os17401	A2J10_02T0049300.1	0.999787	6.80561e-08	1
732	Os5819	A2J10_07T0160600.1	Os17404	MSTRG.8915.1	0.9996	2.39547e-07	1
733	Os4678	A2J10_10T0081100.2	Os17414	A2J10_02T0079500.1	0.999553	2.99475e-07	1
734	Os4678	A2J10_10T0081100.2	Os17418	A2J10_02T0092000.1	0.999507	3.65221e-07	1
735	Os5819	A2J10_07T0160600.1	Os17418	A2J10_02T0092000.1	0.999246	8.52657e-07	1
736	Os4678	A2J10_10T0081100.2	Os17421	A2J10_02T0103900.1	0.999931	7.10776e-09	1
737	Os4678	A2J10_10T0081100.2	Os17430	MSTRG.9383.1	0.999709	1.26926e-07	1
738	Os4678	A2J10_10T0081100.2	Os17444	MSTRG.9593.1	0.999207	9.42356e-07	1
739	Os4678	A2J10_10T0081100.2	Os17447	MSTRG.9677.1	0.999586	2.5646e-07	1
740	Os5819	A2J10_07T0160600.1	Os17451	A2J10_02T0174600.1	0.999508	3.6305e-07	1
741	Os4678	A2J10_10T0081100.2	Os17454	MSTRG.9788.2	0.999753	9.11977e-08	1
742	Os4678	A2J10_10T0081100.2	Os17462	A2J10_02T0206500.6	0.999992	9.52287e-11	1
743	Os4678	A2J10_10T0081100.2	Os17473	MSTRG.10140.2	0.999644	1.89933e-07	1
744	Os4678	A2J10_10T0081100.2	Os17484	A2J10_02T0252000.1	0.999934	6.5843e-09	1
745	Os4678	A2J10_10T0081100.2	Os17486	A2J10_02T0266300.3	0.999811	5.38383e-08	1
746	Os4678	A2J10_10T0081100.2	Os17489	A2J10_02T0270800.2	0.999883	2.04071e-08	1
747	Os4678	A2J10_10T0081100.2	Os17495	A2J10_02T0284100.3	0.999723	1.15179e-07	1
748	Os4678	A2J10_10T0081100.2	Os17500	MSTRG.10689.1	0.999769	8.02058e-08	1
749	Os4678	A2J10_10T0081100.2	Os17502	MSTRG.10694.1	0.999935	6.27953e-09	1
750	Os5819	A2J10_07T0160600.1	Os17512	MSTRG.10855.1	0.999268	8.04203e-07	1
751	Os4678	A2J10_10T0081100.2	Os17516	A2J10_02T0329400.1	0.999915	1.07696e-08	1
752	Os4678	A2J10_10T0081100.2	Os17523	MSTRG.10967.1	0.999978	7.56459e-10	1
753	Os4678	A2J10_10T0081100.2	Os17526	MSTRG.11022.1	0.99929	7.56273e-07	1
754	Os5819	A2J10_07T0160600.1	Os17526	MSTRG.11022.1	0.999227	8.97115e-07	1
755	Os4678	A2J10_10T0081100.2	Os17534	MSTRG.11124.1	0.999774	7.67538e-08	1
756	Os4678	A2J10_10T0081100.2	Os17558	A2J10_02T0376800.1	0.999434	4.80965e-07	1
757	Os4678	A2J10_10T0081100.2	Os17577	A2J10_02T0420500.1	0.999267	8.06694e-07	1
758	Os5819	A2J10_07T0160600.1	Os17577	A2J10_02T0420500.1	0.999435	4.78217e-07	1
759	Os4678	A2J10_10T0081100.2	Os17602	A2J10_03T0046200.1	0.999991	1.16365e-10	1
760	Os4678	A2J10_10T0081100.2	Os17603	A2J10_03T0049300.1	0.99945	4.52902e-07	1
761	Os4678	A2J10_10T0081100.2	Os17621	A2J10_03T0086000.1	0.99986	2.93689e-08	1
762	Os4678	A2J10_10T0081100.2	Os17624	A2J10_03T0089000.1	0.99998	6.0307e-10	1
763	Os4678	A2J10_10T0081100.2	Os17627	A2J10_03T0095100.1	0.999839	3.86887e-08	1
764	Os4678	A2J10_10T0081100.2	Os17642	MSTRG.12790.4	0.999348	6.37351e-07	1
765	Os4678	A2J10_10T0081100.2	Os17646	MSTRG.12840.1	0.999835	4.10101e-08	1
766	Os5819	A2J10_07T0160600.1	Os17654	A2J10_03T0153700.2	0.9998	6.02126e-08	1
767	Os5819	A2J10_07T0160600.1	Os17656	A2J10_03T0160300.1	0.999923	8.94247e-09	1
768	Os4678	A2J10_10T0081100.2	Os17666	A2J10_03T0188400.1	0.99976	8.63333e-08	1
769	Os4678	A2J10_10T0081100.2	Os17687	MSTRG.13648.1	0.999513	3.55585e-07	1
770	Os5819	A2J10_07T0160600.1	Os17687	MSTRG.13648.1	0.999324	6.85359e-07	1
771	Os5819	A2J10_07T0160600.1	Os17688	A2J10_03T0245000.1	0.999193	9.77633e-07	1
772	Os4678	A2J10_10T0081100.2	Os17695	A2J10_03T0256600.1	0.999999	6.48592e-13	1
773	Os5819	A2J10_07T0160600.1	Os17701	A2J10_03T0272000.3	0.999274	7.90888e-07	1
774	Os4678	A2J10_10T0081100.2	Os17712	MSTRG.13965.2	0.99995	3.68098e-09	1
775	Os4678	A2J10_10T0081100.2	Os17713	A2J10_03T0297100.2	0.999884	2.01546e-08	1
776	Os5819	A2J10_07T0160600.1	Os17714	MSTRG.14106.1	0.999853	3.24723e-08	1
777	Os4678	A2J10_10T0081100.2	Os17716	A2J10_03T0305200.1	0.999858	3.03372e-08	1
778	Os4678	A2J10_10T0081100.2	Os17718	A2J10_03T0309500.1	0.999996	2.00373e-11	1
779	Os5819	A2J10_07T0160600.1	Os17722	A2J10_03T0320800.1	0.999861	2.87727e-08	1
780	Os4678	A2J10_10T0081100.2	Os17729	A2J10_03T0331500.5	1	2.9754e-14	1
781	Os4678	A2J10_10T0081100.2	Os17746	A2J10_03T0355600.1	0.999321	6.90462e-07	1
782	Os4678	A2J10_10T0081100.2	Os17747	MSTRG.14546.6	0.999453	4.494e-07	1
783	Os4678	A2J10_10T0081100.2	Os17755	MSTRG.14689.2	0.999647	1.87395e-07	1
784	Os4678	A2J10_10T0081100.2	Os17757	A2J10_03T0373600.1	0.999349	6.35361e-07	1
785	Os4678	A2J10_10T0081100.2	Os17773	A2J10_04T0004100.1	0.99936	6.136e-07	1
786	Os5819	A2J10_07T0160600.1	Os17773	A2J10_04T0004100.1	0.999521	3.44097e-07	1
787	Os5819	A2J10_07T0160600.1	Os17776	A2J10_04T0015300.1	0.999882	2.0773e-08	1
788	Os4678	A2J10_10T0081100.2	Os17777	A2J10_04T0015800.1	0.999998	8.92575e-12	1
789	Os5819	A2J10_07T0160600.1	Os17788	A2J10_04T0050800.1	0.999789	6.67595e-08	1
790	Os4678	A2J10_10T0081100.2	Os17794	A2J10_04T0074700.1	0.999633	2.0218e-07	1
791	Os4678	A2J10_10T0081100.2	Os17807	A2J10_04T0104200.2	0.999947	4.28014e-09	1
792	Os5819	A2J10_07T0160600.1	Os17816	A2J10_04T0113700.2	0.999275	7.8827e-07	1
793	Os5819	A2J10_07T0160600.1	Os17824	A2J10_04T0127100.1	0.999201	9.56219e-07	1
794	Os9527	A2J10_01T0074700.1	Os17827	A2J10_04T0132700.1	0.999288	7.60734e-07	1
795	Os4678	A2J10_10T0081100.2	Os17841	A2J10_04T0177100.1	0.999292	7.5187e-07	1
796	Os5819	A2J10_07T0160600.1	Os17841	A2J10_04T0177100.1	0.999577	2.68516e-07	1
797	Os5819	A2J10_07T0160600.1	Os17844	A2J10_04T0183300.1	0.999982	4.75894e-10	1
798	Os5819	A2J10_07T0160600.1	Os17848	MSTRG.16317.1	0.999538	3.20301e-07	1
799	Os4678	A2J10_10T0081100.2	Os17850	A2J10_04T0197300.3	0.999639	1.95099e-07	1
800	Os4678	A2J10_10T0081100.2	Os17851	MSTRG.16327.1	0.999987	2.40227e-10	1
801	Os4678	A2J10_10T0081100.2	Os17852	MSTRG.16345.1	0.999278	7.82173e-07	1
802	Os4678	A2J10_10T0081100.2	Os17867	A2J10_04T0231400.1	0.999306	7.21788e-07	1
803	Os4678	A2J10_10T0081100.2	Os17884	MSTRG.16891.2	0.999388	5.61834e-07	1
804	Os4678	A2J10_10T0081100.2	Os17890	A2J10_04T0265500.1	0.99974	1.01614e-07	1
805	Os4678	A2J10_10T0081100.2	Os17899	A2J10_04T0283800.4	0.99967	1.63618e-07	1
806	Os5819	A2J10_07T0160600.1	Os17899	A2J10_04T0283800.4	0.999218	9.16537e-07	1
807	Os5819	A2J10_07T0160600.1	Os17901	A2J10_04T0284800.1	0.999809	5.47852e-08	1
808	Os4678	A2J10_10T0081100.2	Os17921	A2J10_05T0001100.1	0.999853	3.26094e-08	1
809	Os7532	A2J10_11T0161900.1	Os17922	MSTRG.17497.1	0.999512	3.57199e-07	1
810	Os17734	MSTRG.14431.1	Os17925	MSTRG.17617.1	0.999699	1.35551e-07	1
811	Os4678	A2J10_10T0081100.2	Os17927	MSTRG.17684.1	0.999465	4.29489e-07	1
812	Os4678	A2J10_10T0081100.2	Os17944	A2J10_05T0062300.1	0.999989	1.97993e-10	1
813	Os4678	A2J10_10T0081100.2	Os17956	A2J10_05T0114600.1	0.999653	1.80105e-07	1
814	Os4678	A2J10_10T0081100.2	Os17962	A2J10_05T0129300.1	0.99946	4.36577e-07	1
815	Os5819	A2J10_07T0160600.1	Os17967	A2J10_05T0144300.1	0.999633	2.0244e-07	1
816	Os4678	A2J10_10T0081100.2	Os17969	A2J10_05T0146300.4	0.999796	6.24063e-08	1
817	Os4678	A2J10_10T0081100.2	Os17970	MSTRG.18516.3	0.99971	1.26105e-07	1
818	Os5819	A2J10_07T0160600.1	Os17970	MSTRG.18516.3	0.999226	8.98299e-07	1
819	Os4678	A2J10_10T0081100.2	Os17971	MSTRG.18520.1	0.999878	2.22957e-08	1
820	Os5819	A2J10_07T0160600.1	Os17975	A2J10_05T0161500.4	0.999724	1.13962e-07	1
821	Os4678	A2J10_10T0081100.2	Os18001	A2J10_05T0212900.1	0.999889	1.84965e-08	1
822	Os4678	A2J10_10T0081100.2	Os18005	MSTRG.19210.6	0.999991	1.34347e-10	1
823	Os4678	A2J10_10T0081100.2	Os18007	A2J10_05T0237700.1	0.999985	3.47705e-10	1
824	Os4678	A2J10_10T0081100.2	Os18008	A2J10_05T0240300.1	0.99959	2.52362e-07	1
825	Os4678	A2J10_10T0081100.2	Os18022	A2J10_05T0264400.2	0.999687	1.46733e-07	1
826	Os4678	A2J10_10T0081100.2	Os18024	MSTRG.19479.1	0.999219	9.13534e-07	1
827	Os4678	A2J10_10T0081100.2	Os18027	A2J10_05T0272300.1	0.999746	9.66251e-08	1
828	Os4678	A2J10_10T0081100.2	Os18029	MSTRG.19516.1	0.999593	2.48522e-07	1
829	Os4678	A2J10_10T0081100.2	Os18031	A2J10_06T0011000.1	0.999612	2.25372e-07	1
830	Os4678	A2J10_10T0081100.2	Os18033	A2J10_06T0011900.1	0.999517	3.49185e-07	1
831	Os4678	A2J10_10T0081100.2	Os18061	A2J10_06T0060600.1	0.999302	7.30188e-07	1
832	Os4678	A2J10_10T0081100.2	Os18072	A2J10_06T0096400.1	0.999447	4.58336e-07	1
833	Os5819	A2J10_07T0160600.1	Os18077	A2J10_06T0105800.1	0.999941	5.29426e-09	1
834	Os4678	A2J10_10T0081100.2	Os18084	MSTRG.20436.1	0.999935	6.31635e-09	1
835	Os4678	A2J10_10T0081100.2	Os18088	MSTRG.20502.3	0.999964	1.99555e-09	1
836	Os4678	A2J10_10T0081100.2	Os18090	MSTRG.20569.1	0.999702	1.3318e-07	1
837	Os4678	A2J10_10T0081100.2	Os18096	A2J10_06T0157400.2	0.999907	1.30419e-08	1
838	Os4678	A2J10_10T0081100.2	Os18110	A2J10_06T0185900.1	0.999994	5.31932e-11	1
839	Os5819	A2J10_07T0160600.1	Os18112	A2J10_06T0188800.1	0.99951	3.6005e-07	1
840	Os4678	A2J10_10T0081100.2	Os18118	A2J10_06T0202000.1	0.999521	3.43868e-07	1
841	Os7532	A2J10_11T0161900.1	Os18120	A2J10_06T0206600.1	0.999598	2.42692e-07	1
842	Os4678	A2J10_10T0081100.2	Os18121	A2J10_06T0207300.1	0.999726	1.12899e-07	1
843	Os4678	A2J10_10T0081100.2	Os18122	A2J10_06T0213100.3	0.999999	1.05316e-12	1
844	Os4678	A2J10_10T0081100.2	Os18127	A2J10_06T0222500.1	0.999928	7.68942e-09	1
845	Os14883	A2J10_01T0108200.1	Os18132	MSTRG.21228.3	0.999443	4.65173e-07	1
846	Os4678	A2J10_10T0081100.2	Os18142	MSTRG.21323.1	0.999835	4.06754e-08	1
847	Os5819	A2J10_07T0160600.1	Os18165	A2J10_06T0289200.3	0.99926	8.21539e-07	1
848	Os4678	A2J10_10T0081100.2	Os18173	A2J10_07T0000200.1	0.999999	1.22147e-12	1
849	Os4678	A2J10_10T0081100.2	Os18179	A2J10_07T0012100.1	0.999999	8.79741e-13	1
850	Os7532	A2J10_11T0161900.1	Os18183	A2J10_07T0017800.1	0.999632	2.02741e-07	1
851	Os5819	A2J10_07T0160600.1	Os18184	A2J10_07T0020500.1	0.999697	1.37749e-07	1
852	Os4678	A2J10_10T0081100.2	Os18185	A2J10_07T0021800.1	0.999327	6.7972e-07	1
853	Os5819	A2J10_07T0160600.1	Os18185	A2J10_07T0021800.1	0.999352	6.30467e-07	1
854	Os4678	A2J10_10T0081100.2	Os18189	A2J10_07T0030200.1	0.999832	4.25017e-08	1
855	Os4678	A2J10_10T0081100.2	Os18208	A2J10_07T0068200.1	0.999946	4.35358e-09	1
856	Os4678	A2J10_10T0081100.2	Os18215	MSTRG.22436.1	0.999774	7.68448e-08	1
857	Os4678	A2J10_10T0081100.2	Os18220	MSTRG.22546.1	0.999993	7.44658e-11	1
858	Os4678	A2J10_10T0081100.2	Os18224	A2J10_07T0122000.1	1	3.00204e-13	1
859	Os4678	A2J10_10T0081100.2	Os18228	A2J10_07T0136400.1	0.999251	8.42229e-07	1
860	Os4678	A2J10_10T0081100.2	Os18229	A2J10_07T0136900.1	0.999366	6.02281e-07	1
861	Os4678	A2J10_10T0081100.2	Os18231	A2J10_07T0142800.3	0.999225	8.99761e-07	1
862	Os4678	A2J10_10T0081100.2	Os18232	A2J10_07T0143000.2	0.999998	4.31344e-12	1
863	Os5819	A2J10_07T0160600.1	Os18236	MSTRG.22824.1	0.999489	3.91173e-07	1
864	Os6079	MSTRG.21022.1	Os18240	A2J10_07T0158800.1	0.999559	2.91231e-07	1
865	Os4678	A2J10_10T0081100.2	Os18241	MSTRG.22923.1	0.999582	2.62673e-07	1
866	Os4678	A2J10_10T0081100.2	Os18243	A2J10_07T0166800.5	0.999273	7.92817e-07	1
867	Os4678	A2J10_10T0081100.2	Os18244	A2J10_07T0176300.1	0.999466	4.2779e-07	1
868	Os4678	A2J10_10T0081100.2	Os18269	A2J10_07T0223400.1	0.999914	1.10903e-08	1
869	Os4678	A2J10_10T0081100.2	Os18271	A2J10_07T0229300.2	0.99998	5.77948e-10	1
870	Os4678	A2J10_10T0081100.2	Os18272	A2J10_07T0231000.2	0.999555	2.96597e-07	1
871	Os5819	A2J10_07T0160600.1	Os18272	A2J10_07T0231000.2	0.99944	4.70541e-07	1
872	Os4678	A2J10_10T0081100.2	Os18273	A2J10_07T0233200.3	0.999578	2.67572e-07	1
873	Os4678	A2J10_10T0081100.2	Os18276	MSTRG.23562.2	0.999863	2.79968e-08	1
874	Os4678	A2J10_10T0081100.2	Os18277	A2J10_07T0245500.1	0.999421	5.03265e-07	1
875	Os5819	A2J10_07T0160600.1	Os18277	A2J10_07T0245500.1	0.999343	6.47982e-07	1
876	Os4678	A2J10_10T0081100.2	Os18281	A2J10_07T0268200.1	0.999386	5.65858e-07	1
877	Os5819	A2J10_07T0160600.1	Os18281	A2J10_07T0268200.1	0.999307	7.19978e-07	1
878	Os4678	A2J10_10T0081100.2	Os18288	A2J10_07T0280000.1	0.999531	3.29559e-07	1
879	Os4678	A2J10_10T0081100.2	Os18289	MSTRG.23891.2	0.999277	7.8463e-07	1
880	Os4678	A2J10_10T0081100.2	Os18299	A2J10_08T0006100.1	0.999596	2.45207e-07	1
881	Os4678	A2J10_10T0081100.2	Os18314	MSTRG.24384.2	0.999694	1.40689e-07	1
882	Os4678	A2J10_10T0081100.2	Os18321	A2J10_08T0097700.1	0.999972	1.20331e-09	1
883	Os4678	A2J10_10T0081100.2	Os18325	A2J10_08T0101900.1	0.999548	3.06798e-07	1
884	Os5819	A2J10_07T0160600.1	Os18327	A2J10_08T0105500.1	0.999734	1.06176e-07	1
885	Os4678	A2J10_10T0081100.2	Os18328	A2J10_08T0108800.2	0.999996	2.57216e-11	1
886	Os5819	A2J10_07T0160600.1	Os18333	A2J10_08T0128300.1	0.99928	7.76734e-07	1
887	Os4678	A2J10_10T0081100.2	Os18337	A2J10_08T0139100.4	0.999921	9.44859e-09	1
888	Os4678	A2J10_10T0081100.2	Os18356	A2J10_08T0173100.3	0.999362	6.09838e-07	1
889	Os5819	A2J10_07T0160600.1	Os18356	A2J10_08T0173100.3	0.999591	2.50589e-07	1
890	Os5819	A2J10_07T0160600.1	Os18360	A2J10_08T0175000.1	0.999947	4.1913e-09	1
891	Os5819	A2J10_07T0160600.1	Os18368	A2J10_08T0181300.1	0.999512	3.56613e-07	1
892	Os4678	A2J10_10T0081100.2	Os18369	A2J10_08T0181600.1	0.999494	3.83995e-07	1
893	Os4678	A2J10_10T0081100.2	Os18372	A2J10_08T0184100.3	0.999807	5.56907e-08	1
894	Os10625	A2J10_06T0007400.1	Os18376	MSTRG.25441.1	0.999332	6.69737e-07	1
895	Os4678	A2J10_10T0081100.2	Os18377	A2J10_08T0199900.1	0.999999	7.10987e-13	1
896	Os4678	A2J10_10T0081100.2	Os18387	A2J10_08T0210700.1	0.999664	1.6935e-07	1
897	Os5819	A2J10_07T0160600.1	Os18391	MSTRG.25623.1	0.999899	1.52439e-08	1
898	Os4678	A2J10_10T0081100.2	Os18393	A2J10_08T0224700.1	0.99944	4.70255e-07	1
899	Os4678	A2J10_10T0081100.2	Os18395	A2J10_08T0225400.4	0.999642	1.92282e-07	1
900	Os10625	A2J10_06T0007400.1	Os18396	A2J10_08T0232300.1	0.999305	7.24376e-07	1
901	Os5819	A2J10_07T0160600.1	Os18411	A2J10_09T0041800.1	0.999396	5.46633e-07	1
902	Os5819	A2J10_07T0160600.1	Os18445	A2J10_09T0135700.2	0.999552	3.00908e-07	1
903	Os4678	A2J10_10T0081100.2	Os18447	MSTRG.26693.1	0.999514	3.54755e-07	1
904	Os4678	A2J10_10T0081100.2	Os18458	A2J10_09T0161100.3	0.999458	4.41373e-07	1
905	Os5819	A2J10_07T0160600.1	Os18458	A2J10_09T0161100.3	0.999436	4.76994e-07	1
906	Os4678	A2J10_10T0081100.2	Os18467	MSTRG.26924.1	0.999294	7.48218e-07	1
907	Os4678	A2J10_10T0081100.2	Os18473	MSTRG.26999.2	0.999762	8.4858e-08	1
908	Os4678	A2J10_10T0081100.2	Os18479	A2J10_09T0191300.2	0.999421	5.03021e-07	1
909	Os4678	A2J10_10T0081100.2	Os18486	A2J10_09T0205500.4	0.999833	4.1732e-08	1
910	Os4678	A2J10_10T0081100.2	Os18494	A2J10_01T0031400.1	0.999699	1.35709e-07	1
911	Os4678	A2J10_10T0081100.2	Os18496	A2J10_01T0049000.2	0.999971	1.23772e-09	1
912	Os5819	A2J10_07T0160600.1	Os18497	MSTRG.439.1	0.999442	4.66562e-07	1
913	Os4678	A2J10_10T0081100.2	Os18501	A2J10_01T0074900.1	0.999814	5.18572e-08	1
914	Os4678	A2J10_10T0081100.2	Os18511	MSTRG.1023.7	0.999483	4.01423e-07	1
915	Os4678	A2J10_10T0081100.2	Os18513	MSTRG.1073.1	0.999656	1.77266e-07	1
916	Os5819	A2J10_07T0160600.1	Os18513	MSTRG.1073.1	0.99919	9.84961e-07	1
917	Os4678	A2J10_10T0081100.2	Os18516	MSTRG.1194.2	0.999787	6.80249e-08	1
918	Os4678	A2J10_10T0081100.2	Os18525	A2J10_01T0213800.2	0.999773	7.74631e-08	1
919	Os4678	A2J10_10T0081100.2	Os18544	A2J10_01T0284400.2	0.999788	6.72122e-08	1
920	Os4678	A2J10_10T0081100.2	Os18548	A2J10_01T0306400.1	0.999921	9.43697e-09	1
921	Os5819	A2J10_07T0160600.1	Os18552	A2J10_01T0318400.4	0.999652	1.81527e-07	1
922	Os4678	A2J10_10T0081100.2	Os18553	MSTRG.2468.2	0.999923	8.78115e-09	1
923	Os4678	A2J10_10T0081100.2	Os18562	A2J10_01T0354300.1	0.999739	1.02063e-07	1
924	Os4678	A2J10_10T0081100.2	Os18571	A2J10_01T0395300.1	0.999457	4.41421e-07	1
925	Os4678	A2J10_10T0081100.2	Os18573	A2J10_01T0397500.1	0.999844	3.63918e-08	1
926	Os4678	A2J10_10T0081100.2	Os18575	A2J10_01T0408400.1	0.99932	6.92532e-07	1
927	Os4678	A2J10_10T0081100.2	Os18585	A2J10_01T0437100.3	0.999906	1.33503e-08	1
928	Os4678	A2J10_10T0081100.2	Os18595	A2J10_01T0465600.1	0.999463	4.32141e-07	1
929	Os4678	A2J10_10T0081100.2	Os18605	A2J10_10T0028100.1	0.999676	1.57055e-07	1
930	Os4678	A2J10_10T0081100.2	Os18613	A2J10_10T0113300.1	0.999993	7.26088e-11	1
931	Os10625	A2J10_06T0007400.1	Os18615	A2J10_10T0146900.3	0.99926	8.20815e-07	1
932	Os4678	A2J10_10T0081100.2	Os18635	A2J10_11T0084700.1	0.99991	1.21475e-08	1
933	Os4678	A2J10_10T0081100.2	Os18639	MSTRG.6386.4	0.999961	2.22452e-09	1
934	Os4678	A2J10_10T0081100.2	Os18641	A2J10_11T0161600.3	0.999971	1.23865e-09	1
935	Os4678	A2J10_10T0081100.2	Os18652	MSTRG.7025.1	0.999444	4.63e-07	1
936	Os18316	A2J10_08T0053800.1	Os18657	MSTRG.7587.5	0.999346	6.41745e-07	1
937	Os4678	A2J10_10T0081100.2	Os18658	A2J10_12T0080500.1	0.999922	9.19715e-09	1
938	Os4678	A2J10_10T0081100.2	Os18671	MSTRG.8378.1	0.999841	3.79419e-08	1
939	Os4678	A2J10_10T0081100.2	Os18672	A2J10_12T0194100.1	0.99964	1.94506e-07	1
940	Os5819	A2J10_07T0160600.1	Os18672	A2J10_12T0194100.1	0.999344	6.45066e-07	1
941	Os4678	A2J10_10T0081100.2	Os18675	A2J10_02T0023400.1	0.999929	7.5325e-09	1
942	Os4678	A2J10_10T0081100.2	Os18691	A2J10_02T0137700.1	0.999898	1.56343e-08	1
943	Os4678	A2J10_10T0081100.2	Os18694	MSTRG.9557.1	0.999831	4.29632e-08	1
944	Os4678	A2J10_10T0081100.2	Os18695	MSTRG.9599.2	0.999996	2.30833e-11	1
945	Os4678	A2J10_10T0081100.2	Os18699	A2J10_02T0182000.1	0.999996	2.49361e-11	1
946	Os9851	A2J10_11T0031200.1	Os18706	A2J10_02T0229600.2	0.999284	7.69743e-07	1
947	Os4678	A2J10_10T0081100.2	Os18711	A2J10_02T0268100.1	0.999549	3.05035e-07	1
948	Os4678	A2J10_10T0081100.2	Os18712	MSTRG.10451.1	0.999307	7.20874e-07	1
949	Os4678	A2J10_10T0081100.2	Os18715	A2J10_02T0283500.3	0.999983	4.4351e-10	1
950	Os4678	A2J10_10T0081100.2	Os18718	A2J10_02T0309200.1	0.999973	1.09366e-09	1
951	Os4678	A2J10_10T0081100.2	Os18719	MSTRG.10789.2	0.999844	3.65656e-08	1
952	Os5819	A2J10_07T0160600.1	Os18722	A2J10_02T0317600.1	0.999544	3.11589e-07	1
953	Os4678	A2J10_10T0081100.2	Os18725	A2J10_02T0327200.3	0.999716	1.20728e-07	1
954	Os5819	A2J10_07T0160600.1	Os18733	A2J10_02T0346000.1	0.999211	9.33801e-07	1
955	Os4678	A2J10_10T0081100.2	Os18747	A2J10_02T0403100.3	0.999965	1.81113e-09	1
956	Os18626	MSTRG.5346.1	Os18751	A2J10_03T0007700.1	0.999736	1.04905e-07	1
957	Os4678	A2J10_10T0081100.2	Os18754	A2J10_03T0017500.1	0.999649	1.84975e-07	1
958	Os4678	A2J10_10T0081100.2	Os18760	A2J10_03T0046500.1	0.999658	1.7529e-07	1
959	Os4678	A2J10_10T0081100.2	Os18762	A2J10_03T0049000.1	0.999984	3.62432e-10	1
960	Os4678	A2J10_10T0081100.2	Os18766	A2J10_03T0100400.1	0.999606	2.32539e-07	1
961	Os4678	A2J10_10T0081100.2	Os18769	A2J10_03T0110300.1	0.999357	6.2031e-07	1
962	Os5819	A2J10_07T0160600.1	Os18769	A2J10_03T0110300.1	0.999376	5.83213e-07	1
963	Os4678	A2J10_10T0081100.2	Os18771	A2J10_03T0116400.2	0.999715	1.21877e-07	1
964	Os4678	A2J10_10T0081100.2	Os18772	MSTRG.12874.3	0.999681	1.52815e-07	1
965	Os4678	A2J10_10T0081100.2	Os18773	A2J10_03T0147800.1	0.999921	9.29563e-09	1
966	Os4678	A2J10_10T0081100.2	Os18774	A2J10_03T0148500.1	0.999979	6.65525e-10	1
967	Os4678	A2J10_10T0081100.2	Os18792	A2J10_03T0271800.1	0.999908	1.2565e-08	1
968	Os4678	A2J10_10T0081100.2	Os18793	MSTRG.13884.1	0.999563	2.86932e-07	1
969	Os5819	A2J10_07T0160600.1	Os18793	MSTRG.13884.1	0.999226	8.98544e-07	1
970	Os5819	A2J10_07T0160600.1	Os18795	A2J10_03T0294100.1	0.999718	1.19283e-07	1
971	Os4678	A2J10_10T0081100.2	Os18801	A2J10_03T0312300.1	0.99985	3.39641e-08	1
972	Os4678	A2J10_10T0081100.2	Os18804	A2J10_03T0326600.2	0.999931	7.20895e-09	1
973	Os5819	A2J10_07T0160600.1	Os18813	A2J10_03T0393900.1	0.999234	8.79137e-07	1
974	Os4678	A2J10_10T0081100.2	Os18818	A2J10_04T0068200.1	0.999286	7.64346e-07	1
975	Os5819	A2J10_07T0160600.1	Os18818	A2J10_04T0068200.1	0.999233	8.83017e-07	1
976	Os4678	A2J10_10T0081100.2	Os18819	MSTRG.15377.1	0.999529	3.32935e-07	1
977	Os4678	A2J10_10T0081100.2	Os18825	MSTRG.15657.2	0.99961	2.28655e-07	1
978	Os4678	A2J10_10T0081100.2	Os18829	A2J10_04T0155200.1	0.999874	2.39614e-08	1
979	Os4678	A2J10_10T0081100.2	Os18831	A2J10_04T0157300.1	0.999428	4.9013e-07	1
980	Os5819	A2J10_07T0160600.1	Os18831	A2J10_04T0157300.1	0.999241	8.64331e-07	1
981	Os4678	A2J10_10T0081100.2	Os18835	MSTRG.16397.4	0.999947	4.25809e-09	1
982	Os5819	A2J10_07T0160600.1	Os18837	A2J10_04T0206900.1	0.999491	3.8864e-07	1
983	Os4678	A2J10_10T0081100.2	Os18841	A2J10_04T0235600.2	0.999548	3.06404e-07	1
984	Os4678	A2J10_10T0081100.2	Os18843	A2J10_04T0238400.3	0.999397	5.44869e-07	1
985	Os4678	A2J10_10T0081100.2	Os18851	MSTRG.17031.1	0.99993	7.41348e-09	1
986	Os4678	A2J10_10T0081100.2	Os18852	A2J10_04T0277400.1	0.999544	3.12061e-07	1
987	Os5819	A2J10_07T0160600.1	Os18854	A2J10_04T0290000.1	0.999864	2.77909e-08	1
988	Os4678	A2J10_10T0081100.2	Os18855	A2J10_04T0296700.1	0.999763	8.39662e-08	1
989	Os4678	A2J10_10T0081100.2	Os18857	A2J10_04T0300400.1	0.999574	2.72787e-07	1
990	Os5819	A2J10_07T0160600.1	Os18867	A2J10_05T0024700.2	0.999649	1.84444e-07	1
991	Os4678	A2J10_10T0081100.2	Os18871	A2J10_05T0094000.1	0.999741	1.00899e-07	1
992	Os4678	A2J10_10T0081100.2	Os18872	MSTRG.18238.1	0.999921	9.26316e-09	1
993	Os4678	A2J10_10T0081100.2	Os18874	A2J10_05T0122100.1	0.999874	2.36918e-08	1
994	Os10625	A2J10_06T0007400.1	Os18877	MSTRG.18497.1	0.99925	8.44222e-07	1
995	Os5819	A2J10_07T0160600.1	Os18884	A2J10_05T0194100.1	0.999546	3.09324e-07	1
996	Os4678	A2J10_10T0081100.2	Os18889	A2J10_05T0208000.2	0.999216	9.22506e-07	1
997	Os18626	MSTRG.5346.1	Os18915	A2J10_06T0039700.1	0.999302	7.30138e-07	1
998	Os5819	A2J10_07T0160600.1	Os18921	A2J10_06T0083800.1	0.999485	3.97458e-07	1
999	Os5819	A2J10_07T0160600.1	Os18922	A2J10_06T0098900.1	0.999278	7.82155e-07	1
1000	Os9851	A2J10_11T0031200.1	Os18923	A2J10_06T0105000.1	0.999465	4.2905e-07	1
1001	Os4678	A2J10_10T0081100.2	Os18924	A2J10_06T0134600.1	0.999313	7.08332e-07	1
1002	Os4678	A2J10_10T0081100.2	Os18925	A2J10_06T0137200.1	0.999986	3.11638e-10	1
1003	Os4678	A2J10_10T0081100.2	Os18928	A2J10_06T0175600.1	0.999475	4.13504e-07	1
1004	Os5819	A2J10_07T0160600.1	Os18930	A2J10_06T0198300.2	0.999724	1.14615e-07	1
1005	Os4678	A2J10_10T0081100.2	Os18935	A2J10_06T0238400.1	0.999769	8.0183e-08	1
1006	Os10625	A2J10_06T0007400.1	Os18939	MSTRG.21525.1	0.999194	9.74327e-07	1
1007	Os4678	A2J10_10T0081100.2	Os18942	MSTRG.21566.4	0.999986	3.0605e-10	1
1008	Os4678	A2J10_10T0081100.2	Os18947	A2J10_07T0003300.1	0.999954	3.18769e-09	1
1009	Os5819	A2J10_07T0160600.1	Os18963	MSTRG.22359.1	0.999453	4.48016e-07	1
1010	Os4678	A2J10_10T0081100.2	Os18965	A2J10_07T0093800.1	0.999759	8.73744e-08	1
1011	Os5819	A2J10_07T0160600.1	Os18968	A2J10_07T0127700.1	0.999463	4.3174e-07	1
1012	Os5819	A2J10_07T0160600.1	Os18976	A2J10_07T0166600.1	0.999278	7.82648e-07	1
1013	Os4678	A2J10_10T0081100.2	Os18978	A2J10_07T0167900.1	0.999406	5.29857e-07	1
1014	Os5819	A2J10_07T0160600.1	Os18984	A2J10_07T0183000.1	0.999826	4.56223e-08	1
1015	Os4678	A2J10_10T0081100.2	Os18993	A2J10_07T0226900.2	0.999868	2.62741e-08	1
1016	Os4678	A2J10_10T0081100.2	Os18995	MSTRG.23564.1	0.999765	8.28532e-08	1
1017	Os4678	A2J10_10T0081100.2	Os19000	A2J10_07T0288900.1	0.999426	4.94281e-07	1
1018	Os5819	A2J10_07T0160600.1	Os19012	MSTRG.24756.1	0.99968	1.53859e-07	1
1019	Os4678	A2J10_10T0081100.2	Os19016	MSTRG.25016.1	0.999644	1.89764e-07	1
1020	Os4678	A2J10_10T0081100.2	Os19024	A2J10_08T0167700.1	0.999496	3.81655e-07	1
1021	Os4678	A2J10_10T0081100.2	Os19040	A2J10_09T0090000.8	0.999999	1.74949e-12	1
1022	Os4678	A2J10_10T0081100.2	Os19041	A2J10_09T0100300.1	0.999933	6.82242e-09	1
1023	Os5819	A2J10_07T0160600.1	Os19048	A2J10_09T0147300.1	0.999854	3.21247e-08	1
1024	Os4678	A2J10_10T0081100.2	Os19052	A2J10_09T0160700.2	0.999869	2.55546e-08	1
1025	Os4678	A2J10_10T0081100.2	Os19069	A2J10_03T0064700.2	1	6.21725e-14	1
1026	Os4678	A2J10_10T0081100.2	Os19119	MSTRG.2824.4	0.999905	1.34458e-08	1
1027	Os4678	A2J10_10T0081100.2	Os19141	MSTRG.951.5	0.999806	5.64778e-08	1
1028	Os4678	A2J10_10T0081100.2	Os19145	A2J10_06T0061500.1	1	3.19744e-13	1
1029	Os5819	A2J10_07T0160600.1	Os19167	MSTRG.12672.2	0.999639	1.95169e-07	1
1030	Os4678	A2J10_10T0081100.2	Os19200	MSTRG.17303.6	0.999228	8.94119e-07	1
1031	Os4678	A2J10_10T0081100.2	Os19232	A2J10_07T0280800.1	0.999227	8.95554e-07	1
1032	Os4678	A2J10_10T0081100.2	Os19310	A2J10_04T0266100.1	0.999486	3.95894e-07	1
1033	Os4678	A2J10_10T0081100.2	Os19313	A2J10_03T0130300.3	0.999992	9.14242e-11	1
1034	Os4678	A2J10_10T0081100.2	Os19316	MSTRG.3734.5	0.999997	1.32598e-11	1
1035	Os4678	A2J10_10T0081100.2	Os19324	A2J10_11T0225100.1	0.999436	4.76712e-07	1
1036	Os4678	A2J10_10T0081100.2	Os19329	A2J10_03T0071300.1	0.999979	6.57114e-10	1
1037	Os1111	MSTRG.8249.1	Os19339	A2J10_07T0198600.1	0.999589	2.53282e-07	1
1038	Os4678	A2J10_10T0081100.2	Os19352	A2J10_10T0099500.3	0.999948	4.02372e-09	1
1039	Os4678	A2J10_10T0081100.2	Os19382	MSTRG.4697.1	0.999846	3.57555e-08	1
1040	Os1034	A2J10_01T0218700.1	Os19451	MSTRG.10856.2	0.999711	1.25007e-07	1
1041	Os4678	A2J10_10T0081100.2	Os19452	A2J10_04T0259700.4	0.999794	6.36193e-08	1
1042	Os4678	A2J10_10T0081100.2	Os19474	A2J10_04T0265200.1	0.999806	5.66663e-08	1
1043	Os4678	A2J10_10T0081100.2	Os19479	MSTRG.13257.1	0.999519	3.46679e-07	1
1044	Os9851	A2J10_11T0031200.1	Os19507	MSTRG.7956.1	0.999485	3.98402e-07	1
1045	Os4678	A2J10_10T0081100.2	Os19581	A2J10_03T0233000.3	0.999446	4.59962e-07	1
1046	Os4678	A2J10_10T0081100.2	Os19586	MSTRG.21143.2	0.999959	2.50292e-09	1
1047	Os9851	A2J10_11T0031200.1	Os19605	MSTRG.8541.2	0.999259	8.23024e-07	1
1048	Os4678	A2J10_10T0081100.2	Os19688	A2J10_03T0306400.2	0.999539	3.1809e-07	1
1049	Os5819	A2J10_07T0160600.1	Os19700	A2J10_06T0251300.2	0.999457	4.42674e-07	1
1050	Os4678	A2J10_10T0081100.2	Os19704	MSTRG.14597.1	0.999262	8.17736e-07	1
1051	Os4678	A2J10_10T0081100.2	Os19719	MSTRG.6100.3	0.999416	5.10959e-07	1
1052	Os4678	A2J10_10T0081100.2	Os19758	MSTRG.10017.1	0.999553	2.99314e-07	1
1053	Os5819	A2J10_07T0160600.1	Os19764	A2J10_12T0078100.2	0.999432	4.84321e-07	1
1054	Os19736	A2J10_04T0179500.1	Os19765	A2J10_05T0164800.1	0.999409	5.23413e-07	1
1055	Os7486	A2J10_05T0260600.1	Os19770	A2J10_04T0120100.1	0.999388	5.62136e-07	1
1056	Os10625	A2J10_06T0007400.1	Os19778	A2J10_07T0092300.1	0.999498	3.77618e-07	1
1057	Os4428	A2J10_09T0095300.1	Os19779	MSTRG.6801.1	0.999669	1.64674e-07	1
1058	Os14883	A2J10_01T0108200.1	Os19795	A2J10_05T0198100.1	0.999198	9.63696e-07	1
1059	Os4678	A2J10_10T0081100.2	Os19801	A2J10_02T0409400.1	0.999538	3.20575e-07	1
1060	Os7486	A2J10_05T0260600.1	Os19810	A2J10_04T0066700.1	0.999571	2.75849e-07	1
1061	Os4678	A2J10_10T0081100.2	Os19848	MSTRG.15599.1	0.99991	1.21311e-08	1
1062	Os4678	A2J10_10T0081100.2	Os19855	A2J10_01T0318500.1	0.99991	1.22685e-08	1
1063	Os4678	A2J10_10T0081100.2	Os19860	MSTRG.8054.1	0.999308	7.17339e-07	1
1064	Os5819	A2J10_07T0160600.1	Os19864	MSTRG.5162.4	0.99985	3.354e-08	1
1065	Os4678	A2J10_10T0081100.2	Os19877	MSTRG.6660.1	0.999651	1.83085e-07	1
1066	Os7486	A2J10_05T0260600.1	Os19894	A2J10_05T0048500.1	0.9994	5.40515e-07	1
1067	Os4678	A2J10_10T0081100.2	Os19897	A2J10_03T0312200.2	0.999416	5.11219e-07	1
1068	Os4678	A2J10_10T0081100.2	Os19903	MSTRG.11773.2	0.999421	5.02421e-07	1
1069	Os4678	A2J10_10T0081100.2	Os19919	A2J10_12T0050500.1	0.99947	4.20532e-07	1
1070	Os7797	A2J10_04T0285000.1	Os19966	MSTRG.1648.4	0.999269	8.01313e-07	1
1071	Os4678	A2J10_10T0081100.2	Os19971	MSTRG.18151.6	0.999672	1.618e-07	1
1072	Os4678	A2J10_10T0081100.2	Os19976	A2J10_03T0008300.5	0.999904	1.37059e-08	1
1073	Os7486	A2J10_05T0260600.1	Os20021	A2J10_04T0079500.2	0.999711	1.25544e-07	1
1074	Os7797	A2J10_04T0285000.1	Os20040	MSTRG.15971.1	0.999818	4.97807e-08	1
1075	Os4678	A2J10_10T0081100.2	Os20050	A2J10_11T0126600.3	0.999777	7.47242e-08	1
1076	Os4678	A2J10_10T0081100.2	Os20080	MSTRG.1824.1	0.999644	1.89977e-07	1
1077	Os5819	A2J10_07T0160600.1	Os20082	A2J10_07T0164500.3	0.999954	3.18929e-09	1
1078	Os4678	A2J10_10T0081100.2	Os20106	MSTRG.6551.2	0.999876	2.31091e-08	1
1079	Os4678	A2J10_10T0081100.2	Os20123	MSTRG.3883.6	0.999998	4.00613e-12	1
1080	Os4678	A2J10_10T0081100.2	Os20133	MSTRG.23194.9	0.99936	6.15192e-07	1
1081	Os4678	A2J10_10T0081100.2	Os20137	A2J10_05T0179200.1	0.999741	1.00611e-07	1
1082	Os4678	A2J10_10T0081100.2	Os20150	A2J10_09T0169800.1	0.99952	3.45476e-07	1
1083	Os7486	A2J10_05T0260600.1	Os20159	A2J10_05T0153100.1	0.999267	8.058e-07	1
1084	Os8836	A2J10_03T0320600.1	Os20162	MSTRG.8339.7	0.99923	8.89674e-07	1
1085	Os7797	A2J10_04T0285000.1	Os20182	MSTRG.1456.2	0.999371	5.93497e-07	1
1086	Os4678	A2J10_10T0081100.2	Os20191	A2J10_01T0449600.1	0.999876	2.32095e-08	1
1087	Os4678	A2J10_10T0081100.2	Os20194	MSTRG.6177.1	0.99982	4.88235e-08	1
1088	Os4678	A2J10_10T0081100.2	Os20208	A2J10_02T0312700.1	0.999714	1.22655e-07	1
1089	Os5819	A2J10_07T0160600.1	Os20208	A2J10_02T0312700.1	0.9992	9.60674e-07	1
1090	Os4678	A2J10_10T0081100.2	Os20256	MSTRG.8097.3	0.999856	3.11571e-08	1
1091	Os4678	A2J10_10T0081100.2	Os20262	MSTRG.16127.1	0.999806	5.65129e-08	1
1092	Os4678	A2J10_10T0081100.2	Os20272	A2J10_07T0175100.1	0.999276	7.86561e-07	1
1093	Os8836	A2J10_03T0320600.1	Os20281	A2J10_02T0239300.1	0.999194	9.74474e-07	1
1094	Os4678	A2J10_10T0081100.2	Os20292	A2J10_07T0280600.2	0.999728	1.11262e-07	1
1095	Os9527	A2J10_01T0074700.1	Os20309	A2J10_04T0234400.1	0.999398	5.43668e-07	1
1096	Os10625	A2J10_06T0007400.1	Os20347	A2J10_02T0331400.7	0.99923	8.88614e-07	1
1097	Os9189	A2J10_02T0231500.1	Os20351	MSTRG.21533.1	0.99925	8.43402e-07	1
1098	Os5456	A2J10_12T0138700.1	Os20356	MSTRG.19363.2	0.999571	2.76569e-07	1
1099	Os7486	A2J10_05T0260600.1	Os20360	MSTRG.7272.1	0.999466	4.27263e-07	1
1100	Os4678	A2J10_10T0081100.2	Os20363	MSTRG.15888.14	0.999417	5.10373e-07	1
1101	Os8836	A2J10_03T0320600.1	Os20381	A2J10_01T0302600.1	0.999678	1.5517e-07	1
1102	Os4678	A2J10_10T0081100.2	Os20388	A2J10_05T0209800.3	0.999933	6.63922e-09	1
1103	Os5819	A2J10_07T0160600.1	Os20404	A2J10_08T0220300.3	0.999993	6.9496e-11	1
1104	Os5456	A2J10_12T0138700.1	Os20411	MSTRG.9591.2	0.999277	7.82893e-07	1
1105	Os8834	MSTRG.2026.1	Os20430	MSTRG.13805.1	0.999299	7.37181e-07	1
1106	Os7486	A2J10_05T0260600.1	Os20438	A2J10_01T0152100.2	0.999741	1.00813e-07	1
1107	Os10625	A2J10_06T0007400.1	Os20444	A2J10_08T0144300.2	0.999591	2.51088e-07	1
1108	Os3466	A2J10_03T0360200.1	Os20446	MSTRG.9664.1	0.999236	8.75202e-07	1
1109	Os7797	A2J10_04T0285000.1	Os20458	A2J10_07T0008800.1	0.999288	7.59523e-07	1
1110	Os4678	A2J10_10T0081100.2	Os20471	A2J10_07T0204800.5	0.999783	7.03154e-08	1
1111	Os4678	A2J10_10T0081100.2	Os20495	A2J10_10T0179600.1	0.999697	1.3808e-07	1
1112	Os8836	A2J10_03T0320600.1	Os20519	MSTRG.6237.1	0.999198	9.64318e-07	1
1113	Os4678	A2J10_10T0081100.2	Os20577	A2J10_02T0021000.1	0.999631	2.0416e-07	1
1114	Os4678	A2J10_10T0081100.2	Os20578	MSTRG.20583.5	0.999978	7.17406e-10	1
1115	Os4678	A2J10_10T0081100.2	Os20615	A2J10_01T0476000.3	0.999224	9.04002e-07	1
1116	Os4678	A2J10_10T0081100.2	Os20663	A2J10_08T0045100.2	0.999806	5.64291e-08	1
1117	Os8836	A2J10_03T0320600.1	Os20672	MSTRG.23503.1	0.999336	6.60474e-07	1
1118	Os9527	A2J10_01T0074700.1	Os20718	MSTRG.6621.1	0.999714	1.23095e-07	1
1119	Os10466	A2J10_03T0148200.1	Os20722	MSTRG.8609.3	0.999746	9.69465e-08	1
1120	Os4678	A2J10_10T0081100.2	Os20750	MSTRG.4460.1	0.999877	2.25408e-08	1
1121	Os4678	A2J10_10T0081100.2	Os20787	A2J10_03T0250400.3	0.999963	2.02048e-09	1
1122	Os4678	A2J10_10T0081100.2	Os20802	MSTRG.5137.7	0.999851	3.32268e-08	1
1123	Os4678	A2J10_10T0081100.2	Os20814	A2J10_04T0136800.1	0.999989	1.72108e-10	1
1124	Os7532	A2J10_11T0161900.1	Os20867	A2J10_03T0351200.1	0.999243	8.60296e-07	1
1125	Os4678	A2J10_10T0081100.2	Os20872	A2J10_04T0242600.4	0.99999	1.46098e-10	1
1126	Os4678	A2J10_10T0081100.2	Os20884	A2J10_08T0174700.1	0.999957	2.83392e-09	1
1127	Os4678	A2J10_10T0081100.2	Os20894	A2J10_02T0349000.3	0.999487	3.94418e-07	1
1128	Os5819	A2J10_07T0160600.1	Os20894	A2J10_02T0349000.3	0.99945	4.53336e-07	1
1129	Os5819	A2J10_07T0160600.1	Os20901	A2J10_04T0272100.1	0.999729	1.0988e-07	1
1130	Os4678	A2J10_10T0081100.2	Os20904	A2J10_02T0379200.1	0.999454	4.47822e-07	1
1131	Os4678	A2J10_10T0081100.2	Os20915	A2J10_02T0047500.3	0.999529	3.32242e-07	1
1132	Os4678	A2J10_10T0081100.2	Os20938	MSTRG.3092.9	0.999533	3.27401e-07	1
1133	Os4678	A2J10_10T0081100.2	Os20944	A2J10_11T0202500.1	0.999857	3.07354e-08	1
1134	Os4678	A2J10_10T0081100.2	Os20949	MSTRG.19359.1	0.999407	5.27175e-07	1
1135	Os4678	A2J10_10T0081100.2	Os20981	MSTRG.18386.1	0.999494	3.83635e-07	1
1136	Os4678	A2J10_10T0081100.2	Os20985	A2J10_04T0096900.1	0.999346	6.41727e-07	1
1137	Os4678	A2J10_10T0081100.2	Os20986	A2J10_03T0113400.1	0.999999	3.04912e-12	1
1138	Os4678	A2J10_10T0081100.2	Os21004	MSTRG.19047.6	0.999902	1.45484e-08	1
1139	Os4678	A2J10_10T0081100.2	Os21020	A2J10_07T0274700.1	0.999999	5.97966e-13	1
1140	Os4678	A2J10_10T0081100.2	Os21051	MSTRG.11724.3	0.999395	5.49164e-07	1
1141	Os4678	A2J10_10T0081100.2	Os21054	A2J10_02T0253400.1	0.99978	7.28827e-08	1
1142	Os5819	A2J10_07T0160600.1	Os21065	A2J10_11T0019300.1	0.999299	7.37918e-07	1
1143	Os4678	A2J10_10T0081100.2	Os21071	MSTRG.11003.1	0.999749	9.43232e-08	1
1144	Os4678	A2J10_10T0081100.2	Os21099	A2J10_01T0015200.1	0.999504	3.68554e-07	1
1145	Os4678	A2J10_10T0081100.2	Os21116	A2J10_05T0252400.2	0.999987	2.52191e-10	1
1146	Os4678	A2J10_10T0081100.2	Os21124	MSTRG.6079.1	0.999969	1.45896e-09	1
1147	Os4678	A2J10_10T0081100.2	Os21134	A2J10_03T0193900.1	0.999892	1.73588e-08	1
1148	Os9851	A2J10_11T0031200.1	Os21166	MSTRG.14355.2	0.999583	2.60406e-07	1
1149	Os4678	A2J10_10T0081100.2	Os21174	MSTRG.11861.4	0.999851	3.3458e-08	1
1150	Os4678	A2J10_10T0081100.2	Os21178	A2J10_04T0117100.3	0.999981	5.38893e-10	1
1151	Os4678	A2J10_10T0081100.2	Os21185	MSTRG.18462.5	0.999665	1.68105e-07	1
1152	Os5819	A2J10_07T0160600.1	Os21185	MSTRG.18462.5	0.9992	9.59515e-07	1
1153	Os4678	A2J10_10T0081100.2	Os21189	A2J10_06T0170900.1	0.999338	6.57554e-07	1
1154	Os5819	A2J10_07T0160600.1	Os21189	A2J10_06T0170900.1	0.999499	3.75868e-07	1
1155	Os4678	A2J10_10T0081100.2	Os21195	A2J10_03T0302600.1	0.999543	3.13371e-07	1
1156	Os4678	A2J10_10T0081100.2	Os21204	A2J10_08T0230300.9	0.999183	9.99755e-07	1
1157	Os4678	A2J10_10T0081100.2	Os21206	A2J10_03T0367400.1	0.999571	2.75449e-07	1
1158	Os5819	A2J10_07T0160600.1	Os21206	A2J10_03T0367400.1	0.999419	5.05467e-07	1
1159	Os4678	A2J10_10T0081100.2	Os21211	A2J10_02T0287800.3	0.999971	1.23052e-09	1
1160	Os4678	A2J10_10T0081100.2	Os21225	MSTRG.844.1	0.999814	5.20306e-08	1
1161	Os4678	A2J10_10T0081100.2	Os21230	A2J10_12T0025200.2	0.999229	8.90927e-07	1
1162	Os5819	A2J10_07T0160600.1	Os21230	A2J10_12T0025200.2	0.999578	2.67516e-07	1
1163	Os5819	A2J10_07T0160600.1	Os21273	MSTRG.7643.3	0.999261	8.18189e-07	1
1164	Os4678	A2J10_10T0081100.2	Os21279	A2J10_03T0309900.3	0.999978	7.03508e-10	1
1165	Os4678	A2J10_10T0081100.2	Os21352	MSTRG.16342.1	0.999935	6.31191e-09	1
1166	Os4678	A2J10_10T0081100.2	Os21381	A2J10_08T0206100.1	0.9999	1.5149e-08	1
1167	Os4678	A2J10_10T0081100.2	Os21382	A2J10_01T0310000.1	0.999355	6.24782e-07	1
1168	Os4678	A2J10_10T0081100.2	Os21384	A2J10_09T0129600.1	0.999923	8.90521e-09	1
1169	Os4678	A2J10_10T0081100.2	Os21398	A2J10_09T0116100.2	0.999742	1.00155e-07	1
1170	Os4678	A2J10_10T0081100.2	Os21426	MSTRG.7273.2	0.999697	1.37541e-07	1
1171	Os4678	A2J10_10T0081100.2	Os21446	A2J10_04T0254100.3	0.999978	6.94933e-10	1
1172	Os4678	A2J10_10T0081100.2	Os21455	A2J10_08T0085000.3	0.999824	4.64744e-08	1
1173	Os4678	A2J10_10T0081100.2	Os21485	A2J10_10T0112600.2	0.999698	1.36687e-07	1
1174	Os5819	A2J10_07T0160600.1	Os21511	A2J10_07T0030300.1	0.999184	9.9815e-07	1
1175	Os4678	A2J10_10T0081100.2	Os21540	A2J10_10T0084000.1	0.999991	1.16719e-10	1
1176	Os4678	A2J10_10T0081100.2	Os21544	A2J10_08T0166100.5	0.99935	6.33439e-07	1
1177	Os5819	A2J10_07T0160600.1	Os21553	A2J10_01T0006300.1	0.999233	8.81557e-07	1
1178	Os4678	A2J10_10T0081100.2	Os21555	A2J10_01T0008100.1	0.999829	4.38077e-08	1
1179	Os4678	A2J10_10T0081100.2	Os21562	A2J10_01T0031100.1	0.999744	9.79221e-08	1
1180	Os4678	A2J10_10T0081100.2	Os21564	A2J10_01T0036700.1	0.999455	4.44832e-07	1
1181	Os4678	A2J10_10T0081100.2	Os21567	MSTRG.463.1	0.999639	1.95898e-07	1
1182	Os4678	A2J10_10T0081100.2	Os21571	A2J10_01T0068400.1	0.999689	1.44846e-07	1
1183	Os19211	MSTRG.26600.1	Os21573	MSTRG.684.5	0.999494	3.84258e-07	1
1184	Os4678	A2J10_10T0081100.2	Os21576	A2J10_01T0102500.1	0.999982	4.84162e-10	1
1185	Os4678	A2J10_10T0081100.2	Os21583	A2J10_01T0115100.4	0.999982	4.61492e-10	1
1186	Os4678	A2J10_10T0081100.2	Os21596	A2J10_01T0173700.1	0.999758	8.79484e-08	1
1187	Os4678	A2J10_10T0081100.2	Os21599	A2J10_01T0180800.1	0.999934	6.48566e-09	1
1188	Os17051	A2J10_01T0337600.1	Os21612	A2J10_01T0240600.1	0.99942	5.04556e-07	1
1189	Os4678	A2J10_10T0081100.2	Os21613	A2J10_01T0248600.1	0.999997	1.13558e-11	1
1190	Os4678	A2J10_10T0081100.2	Os21628	A2J10_01T0294500.2	0.99982	4.84625e-08	1
1191	Os7532	A2J10_11T0161900.1	Os21629	MSTRG.2298.3	0.999269	8.01872e-07	1
1192	Os4678	A2J10_10T0081100.2	Os21632	MSTRG.2447.6	0.999903	1.42367e-08	1
1193	Os4678	A2J10_10T0081100.2	Os21636	A2J10_01T0326700.1	0.999622	2.14166e-07	1
1194	Os4678	A2J10_10T0081100.2	Os21651	A2J10_01T0366000.1	0.999999	1.30584e-12	1
1195	Os4678	A2J10_10T0081100.2	Os21655	A2J10_01T0386300.1	0.99989	1.81475e-08	1
1196	Os4678	A2J10_10T0081100.2	Os21658	MSTRG.3016.5	0.999767	8.12079e-08	1
1197	Os4678	A2J10_10T0081100.2	Os21664	A2J10_01T0431300.2	0.999489	3.92058e-07	1
1198	Os4678	A2J10_10T0081100.2	Os21665	MSTRG.3347.5	0.999406	5.30012e-07	1
1199	Os4678	A2J10_10T0081100.2	Os21673	A2J10_01T0453700.1	0.999651	1.83055e-07	1
1200	Os4678	A2J10_10T0081100.2	Os21676	A2J10_01T0474100.1	0.999998	7.73426e-12	1
1201	Os4678	A2J10_10T0081100.2	Os21679	A2J10_01T0477600.1	1	3.07532e-13	1
1202	Os5819	A2J10_07T0160600.1	Os21696	A2J10_01T0503700.1	0.999676	1.57408e-07	1
1203	Os4678	A2J10_10T0081100.2	Os21700	A2J10_10T0007800.1	0.999793	6.45155e-08	1
1204	Os4678	A2J10_10T0081100.2	Os21702	A2J10_10T0025500.1	0.999927	7.88461e-09	1
1205	Os4678	A2J10_10T0081100.2	Os21703	MSTRG.4147.1	0.999824	4.64472e-08	1
1206	Os4678	A2J10_10T0081100.2	Os21705	A2J10_10T0041900.1	0.999872	2.47056e-08	1
1207	Os4678	A2J10_10T0081100.2	Os21706	A2J10_10T0048500.1	0.999404	5.33361e-07	1
1208	Os4678	A2J10_10T0081100.2	Os21711	MSTRG.4378.1	0.999911	1.1808e-08	1
1209	Os4678	A2J10_10T0081100.2	Os21712	A2J10_10T0071600.1	0.999992	8.5997e-11	1
1210	Os4678	A2J10_10T0081100.2	Os21714	MSTRG.4455.1	0.999862	2.85795e-08	1
1211	Os4678	A2J10_10T0081100.2	Os21716	MSTRG.4498.1	0.999449	4.55495e-07	1
1212	Os5819	A2J10_07T0160600.1	Os21721	A2J10_10T0115200.1	0.999196	9.70398e-07	1
1213	Os4678	A2J10_10T0081100.2	Os21723	A2J10_10T0135300.1	0.999687	1.46509e-07	1
1214	Os10625	A2J10_06T0007400.1	Os21739	A2J10_11T0025500.1	0.999434	4.81045e-07	1
1215	Os5819	A2J10_07T0160600.1	Os21743	A2J10_11T0038100.1	0.999341	6.51626e-07	1
1216	Os4678	A2J10_10T0081100.2	Os21744	MSTRG.5644.1	0.999956	2.84358e-09	1
1217	Os5819	A2J10_07T0160600.1	Os21748	A2J10_11T0093000.1	0.999671	1.62604e-07	1
1218	Os4678	A2J10_10T0081100.2	Os21750	MSTRG.6080.1	0.999487	3.95418e-07	1
1219	Os4678	A2J10_10T0081100.2	Os21751	A2J10_11T0113000.1	0.999758	8.80789e-08	1
1220	Os4678	A2J10_10T0081100.2	Os21755	A2J10_11T0144400.3	0.999585	2.58915e-07	1
1221	Os4678	A2J10_10T0081100.2	Os21756	MSTRG.6393.2	0.999835	4.08216e-08	1
1222	Os5819	A2J10_07T0160600.1	Os21760	A2J10_11T0182100.1	0.999782	7.11664e-08	1
1223	Os4678	A2J10_10T0081100.2	Os21785	MSTRG.7326.3	0.999952	3.49175e-09	1
1224	Os4678	A2J10_10T0081100.2	Os21786	MSTRG.7339.9	0.999987	2.64164e-10	1
1225	Os4678	A2J10_10T0081100.2	Os21787	A2J10_12T0038900.1	0.999996	1.90279e-11	1
1226	Os4678	A2J10_10T0081100.2	Os21790	A2J10_12T0057000.5	0.999967	1.62575e-09	1
1227	Os4678	A2J10_10T0081100.2	Os21795	A2J10_12T0076300.2	0.999614	2.23282e-07	1
1228	Os5819	A2J10_07T0160600.1	Os21805	A2J10_12T0149000.1	0.999716	1.2134e-07	1
1229	Os4678	A2J10_10T0081100.2	Os21809	A2J10_12T0157600.3	0.99992	9.55549e-09	1
1230	Os4678	A2J10_10T0081100.2	Os21812	A2J10_12T0166000.1	0.999886	1.96534e-08	1
1231	Os4678	A2J10_10T0081100.2	Os21825	A2J10_02T0026000.1	0.999864	2.76543e-08	1
1232	Os4678	A2J10_10T0081100.2	Os21827	A2J10_02T0030000.1	0.999642	1.92048e-07	1
1233	Os4678	A2J10_10T0081100.2	Os21828	A2J10_02T0031500.1	0.999982	4.62762e-10	1
1234	Os4678	A2J10_10T0081100.2	Os21842	A2J10_02T0078800.3	0.999999	1.42464e-12	1
1235	Os4678	A2J10_10T0081100.2	Os21856	A2J10_02T0175800.1	0.999887	1.91044e-08	1
1236	Os4678	A2J10_10T0081100.2	Os21859	A2J10_02T0197700.3	0.999969	1.46896e-09	1
1237	Os4678	A2J10_10T0081100.2	Os21860	MSTRG.9878.1	0.999884	2.01736e-08	1
1238	Os4678	A2J10_10T0081100.2	Os21861	A2J10_02T0206600.2	0.999937	5.9194e-09	1
1239	Os4678	A2J10_10T0081100.2	Os21867	A2J10_02T0226200.2	0.999869	2.5579e-08	1
1240	Os4678	A2J10_10T0081100.2	Os21888	A2J10_02T0307400.2	0.99983	4.34022e-08	1
1241	Os4678	A2J10_10T0081100.2	Os21889	MSTRG.10786.2	0.99991	1.21913e-08	1
1242	Os4678	A2J10_10T0081100.2	Os21892	A2J10_02T0339200.1	0.999936	6.06086e-09	1
1243	Os4678	A2J10_10T0081100.2	Os21893	A2J10_02T0342100.1	0.999949	3.906e-09	1
1244	Os19736	A2J10_04T0179500.1	Os21899	MSTRG.11181.1	0.99966	1.73323e-07	1
1245	Os5819	A2J10_07T0160600.1	Os21917	A2J10_03T0007600.3	0.99969	1.44443e-07	1
1246	Os4678	A2J10_10T0081100.2	Os21921	A2J10_03T0020200.1	0.999514	3.53853e-07	1
1247	Os4678	A2J10_10T0081100.2	Os21922	MSTRG.11914.5	0.999514	3.54512e-07	1
1248	Os4678	A2J10_10T0081100.2	Os21925	MSTRG.11947.8	0.999751	9.27246e-08	1
1249	Os4678	A2J10_10T0081100.2	Os21930	A2J10_03T0041200.3	0.999938	5.68022e-09	1
1250	Os4678	A2J10_10T0081100.2	Os21941	A2J10_03T0081400.1	0.999885	1.97057e-08	1
1251	Os4678	A2J10_10T0081100.2	Os21952	MSTRG.12725.1	0.999306	7.21527e-07	1
1252	Os4678	A2J10_10T0081100.2	Os21953	MSTRG.12750.2	0.999999	6.0929e-13	1
1253	Os4678	A2J10_10T0081100.2	Os21957	A2J10_03T0135900.1	0.999779	7.30018e-08	1
1254	Os4678	A2J10_10T0081100.2	Os21958	MSTRG.12889.3	0.999792	6.51599e-08	1
1255	Os4678	A2J10_10T0081100.2	Os21962	MSTRG.13011.7	1	4.90719e-14	1
1256	Os4678	A2J10_10T0081100.2	Os21965	A2J10_03T0164900.1	0.999959	2.57107e-09	1
1257	Os4678	A2J10_10T0081100.2	Os21971	A2J10_03T0205300.1	0.99985	3.39339e-08	1
1258	Os4678	A2J10_10T0081100.2	Os21974	MSTRG.13532.1	0.999925	8.49426e-09	1
1259	Os4678	A2J10_10T0081100.2	Os21976	MSTRG.13591.1	0.999551	3.02316e-07	1
1260	Os4678	A2J10_10T0081100.2	Os21977	A2J10_03T0240300.1	0.999244	8.58191e-07	1
1261	Os4678	A2J10_10T0081100.2	Os21980	MSTRG.13676.1	0.999971	1.26204e-09	1
1262	Os5819	A2J10_07T0160600.1	Os21982	MSTRG.13694.1	0.999467	4.26633e-07	1
1263	Os4678	A2J10_10T0081100.2	Os21984	A2J10_03T0262200.1	0.999324	6.86309e-07	1
1264	Os4678	A2J10_10T0081100.2	Os21989	MSTRG.13960.2	0.999806	5.64895e-08	1
1265	Os4678	A2J10_10T0081100.2	Os21995	A2J10_03T0303000.1	0.999717	1.19712e-07	1
1266	Os4678	A2J10_10T0081100.2	Os22006	A2J10_03T0336600.1	0.999548	3.06982e-07	1
1267	Os4678	A2J10_10T0081100.2	Os22007	A2J10_03T0358200.1	0.999283	7.69915e-07	1
1268	Os4678	A2J10_10T0081100.2	Os22011	A2J10_03T0370000.1	0.99997	1.31285e-09	1
1269	Os4678	A2J10_10T0081100.2	Os22014	A2J10_03T0393200.1	0.999532	3.27795e-07	1
1270	Os4678	A2J10_10T0081100.2	Os22022	A2J10_04T0034400.1	0.99975	9.39184e-08	1
1271	Os10625	A2J10_06T0007400.1	Os22031	A2J10_04T0078200.1	0.999349	6.35559e-07	1
1272	Os4678	A2J10_10T0081100.2	Os22038	A2J10_04T0096700.2	0.999938	5.69984e-09	1
1273	Os5819	A2J10_07T0160600.1	Os22044	A2J10_04T0125800.1	0.999517	3.50038e-07	1
1274	Os10625	A2J10_06T0007400.1	Os22044	A2J10_04T0125800.1	0.999206	9.45392e-07	1
1275	Os4678	A2J10_10T0081100.2	Os22046	A2J10_04T0129700.1	0.999502	3.72236e-07	1
1276	Os4678	A2J10_10T0081100.2	Os22050	A2J10_04T0140700.1	0.999999	3.92797e-13	1
1277	Os4678	A2J10_10T0081100.2	Os22052	MSTRG.15922.2	0.99995	3.70261e-09	1
1278	Os5819	A2J10_07T0160600.1	Os22053	A2J10_04T0152300.2	0.999858	3.03408e-08	1
1279	Os4678	A2J10_10T0081100.2	Os22057	A2J10_04T0162600.1	0.999943	4.81127e-09	1
1280	Os4678	A2J10_10T0081100.2	Os22059	A2J10_04T0164500.1	0.999461	4.35031e-07	1
1281	Os4678	A2J10_10T0081100.2	Os22061	MSTRG.16114.1	0.999928	7.73009e-09	1
1282	Os4678	A2J10_10T0081100.2	Os22064	A2J10_04T0183100.1	0.999789	6.69235e-08	1
1283	Os4678	A2J10_10T0081100.2	Os22075	MSTRG.16502.1	0.999252	8.39351e-07	1
1284	Os4678	A2J10_10T0081100.2	Os22110	A2J10_05T0076100.1	0.999709	1.26945e-07	1
1285	Os18451	A2J10_09T0152600.1	Os22117	MSTRG.18358.1	0.999358	6.18653e-07	1
1286	Os4678	A2J10_10T0081100.2	Os22118	MSTRG.18390.1	0.999986	2.94011e-10	1
1287	Os4678	A2J10_10T0081100.2	Os22122	MSTRG.18476.3	0.999858	3.01137e-08	1
1288	Os4678	A2J10_10T0081100.2	Os22130	A2J10_05T0184900.1	0.999297	7.40928e-07	1
1289	Os4678	A2J10_10T0081100.2	Os22132	MSTRG.18872.1	0.999365	6.05651e-07	1
1290	Os4678	A2J10_10T0081100.2	Os22138	A2J10_05T0205100.2	0.999412	5.18253e-07	1
1291	Os4678	A2J10_10T0081100.2	Os22139	A2J10_05T0215800.2	0.999996	2.39788e-11	1
1292	Os4678	A2J10_10T0081100.2	Os22148	A2J10_05T0237900.1	0.999999	1.28653e-12	1
1293	Os4678	A2J10_10T0081100.2	Os22152	MSTRG.19360.1	0.999368	5.99426e-07	1
1294	Os4678	A2J10_10T0081100.2	Os22153	MSTRG.19384.2	0.999773	7.69852e-08	1
1295	Os4678	A2J10_10T0081100.2	Os22154	A2J10_05T0255700.1	0.999999	1.33937e-12	1
1296	Os4678	A2J10_10T0081100.2	Os22157	A2J10_05T0273300.1	1	3.73035e-14	1
1297	Os4678	A2J10_10T0081100.2	Os22158	A2J10_05T0273700.3	0.999927	8.07184e-09	1
1298	Os4678	A2J10_10T0081100.2	Os22171	A2J10_06T0044800.1	0.999325	6.84041e-07	1
1299	Os4678	A2J10_10T0081100.2	Os22174	MSTRG.20064.1	0.999998	3.8971e-12	1
1300	Os4678	A2J10_10T0081100.2	Os22177	A2J10_06T0087500.1	0.999863	2.80262e-08	1
1301	Os4678	A2J10_10T0081100.2	Os22180	MSTRG.20345.1	0.999918	1.01849e-08	1
1302	Os4678	A2J10_10T0081100.2	Os22181	A2J10_06T0111900.1	0.999542	3.14377e-07	1
1303	Os4678	A2J10_10T0081100.2	Os22184	A2J10_06T0120400.2	0.999986	2.79195e-10	1
1304	Os4678	A2J10_10T0081100.2	Os22193	MSTRG.20801.1	0.999473	4.16668e-07	1
1305	Os4678	A2J10_10T0081100.2	Os22194	A2J10_06T0175000.4	0.999806	5.63354e-08	1
1306	Os6079	MSTRG.21022.1	Os22196	A2J10_06T0191300.1	0.999286	7.65117e-07	1
1307	Os4678	A2J10_10T0081100.2	Os22202	A2J10_06T0212400.1	0.99987	2.52469e-08	1
1308	Os4678	A2J10_10T0081100.2	Os22209	A2J10_06T0234800.2	0.999952	3.38917e-09	1
1309	Os4678	A2J10_10T0081100.2	Os22212	A2J10_06T0247400.1	0.999523	3.4075e-07	1
1310	Os5819	A2J10_07T0160600.1	Os22212	A2J10_06T0247400.1	0.999557	2.94728e-07	1
1311	Os4678	A2J10_10T0081100.2	Os22220	A2J10_06T0263300.1	0.99923	8.89933e-07	1
1312	Os4678	A2J10_10T0081100.2	Os22224	A2J10_06T0291100.1	0.999697	1.37791e-07	1
1313	Os10625	A2J10_06T0007400.1	Os22228	A2J10_06T0299700.1	0.999349	6.35237e-07	1
1314	Os5819	A2J10_07T0160600.1	Os22229	A2J10_06T0300000.1	0.999579	2.66192e-07	1
1315	Os4678	A2J10_10T0081100.2	Os22237	A2J10_07T0026600.1	0.99956	2.90139e-07	1
1316	Os4678	A2J10_10T0081100.2	Os22239	A2J10_07T0031700.1	0.999825	4.56885e-08	1
1317	Os4678	A2J10_10T0081100.2	Os22242	A2J10_07T0055100.1	0.999804	5.75468e-08	1
1318	Os4678	A2J10_10T0081100.2	Os22244	MSTRG.22281.1	0.999991	1.13182e-10	1
1319	Os4678	A2J10_10T0081100.2	Os22248	A2J10_07T0096400.1	0.999287	7.62732e-07	1
1320	Os4678	A2J10_10T0081100.2	Os22250	A2J10_07T0102000.1	0.999617	2.20122e-07	1
1321	Os4678	A2J10_10T0081100.2	Os22256	A2J10_07T0136200.1	0.999441	4.68931e-07	1
1322	Os4678	A2J10_10T0081100.2	Os22266	A2J10_07T0197500.1	1	1.17018e-13	1
1323	Os4678	A2J10_10T0081100.2	Os22269	A2J10_07T0206500.8	0.999653	1.80545e-07	1
1324	Os4678	A2J10_10T0081100.2	Os22270	A2J10_07T0207300.1	0.999555	2.96767e-07	1
1325	Os4678	A2J10_10T0081100.2	Os22275	A2J10_07T0222700.1	0.999982	4.9327e-10	1
1326	Os4678	A2J10_10T0081100.2	Os22277	A2J10_07T0226700.2	0.999936	6.0533e-09	1
1327	Os4678	A2J10_10T0081100.2	Os22284	A2J10_07T0242700.1	0.999565	2.84248e-07	1
1328	Os4678	A2J10_10T0081100.2	Os22291	A2J10_07T0282800.1	0.999791	6.57756e-08	1
1329	Os4678	A2J10_10T0081100.2	Os22293	MSTRG.23929.1	0.999804	5.76009e-08	1
1330	Os5819	A2J10_07T0160600.1	Os22294	A2J10_07T0286100.2	0.999472	4.179e-07	1
1331	Os4678	A2J10_10T0081100.2	Os22297	A2J10_08T0003000.1	0.999544	3.11948e-07	1
1332	Os5819	A2J10_07T0160600.1	Os22297	A2J10_08T0003000.1	0.999276	7.86886e-07	1
1333	Os4678	A2J10_10T0081100.2	Os22299	MSTRG.24132.1	0.999713	1.23446e-07	1
1334	Os4678	A2J10_10T0081100.2	Os22303	A2J10_08T0015900.1	0.999823	4.71811e-08	1
1335	Os4678	A2J10_10T0081100.2	Os22304	A2J10_08T0018800.1	0.999999	9.35918e-13	1
1336	Os4678	A2J10_10T0081100.2	Os22311	MSTRG.24592.1	0.999934	6.5175e-09	1
1337	Os4678	A2J10_10T0081100.2	Os22314	A2J10_08T0085500.1	0.999791	6.5679e-08	1
1338	Os5819	A2J10_07T0160600.1	Os22317	A2J10_08T0096200.2	0.999485	3.97715e-07	1
1339	Os4678	A2J10_10T0081100.2	Os22318	MSTRG.24803.2	0.999784	6.99995e-08	1
1340	Os4678	A2J10_10T0081100.2	Os22319	A2J10_08T0121300.1	0.999391	5.56895e-07	1
1341	Os4678	A2J10_10T0081100.2	Os22321	A2J10_08T0139700.1	0.999941	5.16811e-09	1
1342	Os4678	A2J10_10T0081100.2	Os22328	MSTRG.25231.2	0.999613	2.2515e-07	1
1343	Os5819	A2J10_07T0160600.1	Os22332	A2J10_08T0177200.1	0.999208	9.40598e-07	1
1344	Os4678	A2J10_10T0081100.2	Os22333	A2J10_08T0182800.1	0.999947	4.25649e-09	1
1345	Os4678	A2J10_10T0081100.2	Os22340	A2J10_08T0206600.1	0.999239	8.68511e-07	1
1346	Os4678	A2J10_10T0081100.2	Os22341	A2J10_08T0211300.2	0.999839	3.88117e-08	1
1347	Os4678	A2J10_10T0081100.2	Os22348	A2J10_08T0239000.1	0.999837	4.00677e-08	1
1348	Os4678	A2J10_10T0081100.2	Os22350	A2J10_09T0004700.1	0.999584	2.59978e-07	1
1349	Os4678	A2J10_10T0081100.2	Os22352	MSTRG.25858.1	0.999967	1.61537e-09	1
1350	Os4678	A2J10_10T0081100.2	Os22353	A2J10_09T0029900.1	0.999378	5.79606e-07	1
1351	Os5819	A2J10_07T0160600.1	Os22353	A2J10_09T0029900.1	0.99936	6.13611e-07	1
1352	Os4678	A2J10_10T0081100.2	Os22368	MSTRG.26564.1	0.999495	3.83096e-07	1
1353	Os5819	A2J10_07T0160600.1	Os22368	MSTRG.26564.1	0.99948	4.04796e-07	1
1354	Os9851	A2J10_11T0031200.1	Os22376	MSTRG.26665.2	0.999786	6.85322e-08	1
1355	Os4678	A2J10_10T0081100.2	Os22383	MSTRG.26843.6	0.999769	7.98909e-08	1
1356	Os9851	A2J10_11T0031200.1	Os22385	MSTRG.26876.1	0.99922	9.1258e-07	1
1357	Os4678	A2J10_10T0081100.2	Os22392	A2J10_09T0191000.1	0.999741	1.00303e-07	1
1358	Os5819	A2J10_07T0160600.1	Os22396	A2J10_09T0198800.1	0.999647	1.86817e-07	1
1359	Os4678	A2J10_10T0081100.2	Os22402	A2J10_09T0213700.1	0.999845	3.58757e-08	1
1360	Os4678	A2J10_10T0081100.2	Os22413	MSTRG.731.1	0.999707	1.28778e-07	1
1361	Os4678	A2J10_10T0081100.2	Os22421	A2J10_01T0180300.1	0.99947	4.20881e-07	1
1362	Os4678	A2J10_10T0081100.2	Os22429	MSTRG.1859.1	0.999792	6.46507e-08	1
1363	Os4678	A2J10_10T0081100.2	Os22431	A2J10_01T0263400.2	0.999875	2.34822e-08	1
1364	Os4678	A2J10_10T0081100.2	Os22434	A2J10_01T0288400.1	0.999956	2.91657e-09	1
1365	Os4678	A2J10_10T0081100.2	Os22435	MSTRG.2238.4	0.999991	1.11522e-10	1
1366	Os4678	A2J10_10T0081100.2	Os22454	A2J10_01T0470700.1	0.99929	7.56938e-07	1
1367	Os4678	A2J10_10T0081100.2	Os22465	A2J10_10T0110300.1	0.999538	3.20447e-07	1
1368	Os4678	A2J10_10T0081100.2	Os22466	A2J10_10T0110900.1	0.999397	5.45031e-07	1
1369	Os4678	A2J10_10T0081100.2	Os22468	A2J10_10T0112400.2	0.999284	7.68215e-07	1
1370	Os4678	A2J10_10T0081100.2	Os22471	A2J10_10T0125300.3	0.999396	5.47825e-07	1
1371	Os5819	A2J10_07T0160600.1	Os22471	A2J10_10T0125300.3	0.999227	8.94953e-07	1
1372	Os4678	A2J10_10T0081100.2	Os22482	MSTRG.5634.2	0.999476	4.11189e-07	1
1373	Os4678	A2J10_10T0081100.2	Os22483	A2J10_11T0042900.1	0.999867	2.63522e-08	1
1374	Os4678	A2J10_10T0081100.2	Os22486	MSTRG.5800.1	0.999385	5.66823e-07	1
1375	Os4678	A2J10_10T0081100.2	Os22488	A2J10_11T0072200.1	0.999927	7.95696e-09	1
1376	Os4678	A2J10_10T0081100.2	Os22493	MSTRG.6531.1	0.999729	1.10515e-07	1
1377	Os4678	A2J10_10T0081100.2	Os22503	A2J10_11T0239200.1	0.999718	1.18879e-07	1
1378	Os4678	A2J10_10T0081100.2	Os22507	A2J10_12T0019200.1	0.999691	1.43269e-07	1
1379	Os4678	A2J10_10T0081100.2	Os22512	A2J10_12T0053700.1	0.999407	5.27748e-07	1
1380	Os5819	A2J10_07T0160600.1	Os22512	A2J10_12T0053700.1	0.999479	4.0703e-07	1
[truncated: 8,253 more rows]
