# Supplementary material for: RNA-Seq, co-expression network and eQTL analysis identify key genes for chlorophyll and carbon metabolism in rice
Source: Research Square preprint supplement (doi:10.21203/rs.3.rs-2517802/v1), 2023-02-08
Supplement: Supplementary file 11 [file ecfc1835f15e5496cda590b9.xlsx]

## Sheet: N22
Morphological Character	N22 a	N22 b	N22 c	Mean	SD	Mean±SD	Variance	n		SEM	Mean±SEM
Plant height (cm)	111	110	109	110	1	110±1	1	3		0.57735	110±0.58
Root length (cm)	39	34	36	36.3333	2.51661	36.33±2.51	6.33333	3		1.45297	36.33±1.45
Stem length (cm)	89	88	88	88.3333	0.57735	88.33±0.58	0.333333	3		0.333333	88.33±0.33
Number of tillers	4	4	3	3.66667	0.57735	3.67±0.58	0.333333	3		0.333333	3.67±0.33
Flag leaf length (cm)	29.5	26.6	26	27.3667	1.87172	27.37±1.9	3.50333	3		1.08064	27.37±1.08
Flag leaf width (cm)	1.2	1.1	1	1.1	0.1	1.1±0.1	0.01	3		0.057735	1.1±0.06
Number of panicle	9	12	8	9.66667	2.08167	9.67±2.0	4.33333	3		1.20185	9.67±1.2
Panicle length (cm)	22.5	23	22	22.5	0.5	22.5±0.5	0.25	3		0.288675	22.5±0.2
Panicle branching	9	7	7	7.66667	1.1547	7.7±1.15	1.33333	3		0.666667	7.7±0.7
Panicle density	16	13	11	13.3333	2.51661	13.33±2.5	6.33333	3		1.45297	13.33±1.45
Grain number	72	69	68	69.6667	2.08167	69.67±2.08	4.33333	3		1.20185	69.67±1.2
Grain weight/1000	22.18	21.75	22.5	22.1433	0.376342		0.141633			0.217281	22.14±0.21
	22.14

## Sheet: M-507
Morphological Character	M-507 a	M-507 b	M-507 c	Mean	SD	Mean±SD	Variance	n		SEM	Mean±SEM
Plant height (cm)	116	121	118	118.333	2.51661	118.33±2.52	6.33333	3		1.45297	118.33±1.45
Root length (cm)	40	36	37	37.6667	2.08167	37.67±2.08	4.33333	3		1.20185	37.67±1.2
Stem length (cm)	98.5	104	100.5	101	2.78388	101±2.78	7.75	3		1.60728	101±1.6
Number of tillers	4	5	2	3.66667	1.52753	3.67±1.53	2.33333	3		0.881917	3.67±0.88
Flag leaf length (cm)	55	56	58	56.3333	1.52753	56.33±1.53	2.33333	3		0.881917	56.33±0.88
Flag leaf width (cm)	1.5	1	1.3	1.26667	0.251661	1.27±0.25	0.0633333	3		0.145297	1.27±0.14
Number of panicle	7	10	8	8.33333	1.52753	8.33±1.53	2.33333	3		0.881917	8.33±0.88
Panicle length (cm)	19.3	19	17.3	18.5333	1.07858	18.53±1.08	1.16333	3		0.622718	18.53±0.62
Panicle branching	8	7	8	7.66667	0.57735	7.67±0.58	0.333333	3		0.333333	7.67±0.33
Panicle density	11.33	10.6	15.33	12.42	2.54643	12.42±2.55	6.4843	3		1.47018	12.42±1.47
Grain number	83	78	81	80.6667	2.51661	80.67±2.52	6.33333	3		1.45297	80.67±1.45
Grain weight/1000	20.49	19.69	19.85	20.01	0.42332		0.1792			0.244404	20.01±0.24
	20.015

## Sheet: t-test
Morphological Character	N22 a	N22 b	N22 c	M-507 a	M-507 b	M-507 c	t-test
Plant height (cm)	111	110	109	116	121	118	0.00596519
Root length (cm)	39	34	36	40	36	37	0.518519
Stem length (cm)	89	88	88	98.5	104	100.5	0.00151816
Number of tillers	4	4	3	4	5	2	1
Flag leaf length (cm)	29.5	26.6	26	55	56	58	3.17659e-05
Flag leaf width (cm)	1.2	1.1	1	1.5	1	1.3	0.34649
Number of panicle	9	12	8	7	10	8	0.421648
Panicle length (cm)	22.5	23	22	19.3	19	17.3	0.00445269
Panicle branching	9	7	7	8	7	8	1
Panicle density	16	13	11	11.33	10.6	15.33	0.681427
Grain number	72	69	68	83	78	81	0.00430299
Grain weight/1000	22.18	21.75	22.5	20.49	19.69	19.85	0.00285158
t-test value is a p-value, if it is <0.05 than it is significant

## Sheet: Supp_fig_1
Morphological Character	N22	M-507
Plant height (cm)	110	118.33
Root length (cm)	36.33	37.67
Stem length (cm)	88.33	101
Number of tillers	3.67	3.67
Flag leaf length (cm)	27.37	56.33
Flag leaf width (cm)	1.1	1.27
Number of panicle	9.67	8.33
Panicle length (cm)	22.5	18.53
Panicle branching	7.67	7.67
Panicle density	13.33	12.42
Grain number	69.67	80.66
Grain weight/1000	22.14	20.01

## Sheet: Table_1
Table s1. Phenotypic and agronomic traits of N22 and M-507.
Material	Plant height (cm)	Root length (cm)	Stem length (cm)	Tillers/plant	Flag leaf length (cm)	Flag leaf width (cm)	Panicle/plant	Panicle length (cm)	Spike/panicle	Spikelet/spike	Grains/plant	Grain weight/1000
N22	110±0.58	36.33±1.45	88.33±0.33	3.67±0.33	27.37±1.08	1.1±0.06	9.67±1.2	22.5±0.2	7.7±0.7	13.33±1.45	69.67±1.2	22.14±0.21
M-507	118.33±1.45	37.67±1.2	101±1.6	3.67±0.88	56.33±0.88	1.27±0.14	8.33±0.88	18.53±0.62	7.67±0.33	12.42±1.47	80.67±1.45	20.01±0.24
