# Supplementary material for: RNA-Seq, co-expression network and eQTL analysis identify key genes for chlorophyll and carbon metabolism in rice
Source: Research Square preprint supplement (doi:10.21203/rs.3.rs-2517802/v1), 2023-02-08
Supplement: Supplementary file 12 [file fde946abc009db344cb42696.xlsx]

## Sheet: DEG
Up_DEG	Down_DEG	Up_DEG_found	Down_DEG_found
LOC_Os01g02370	LOC_Os01g02870	LOC_Os01g02390	LOC_Os04g32850
LOC_Os01g02390	LOC_Os01g04920	LOC_Os01g02550	LOC_Os06g48180
LOC_Os01g02550	LOC_Os01g07630	LOC_Os01g02810	LOC_Os07g08710
LOC_Os01g02810	LOC_Os01g09540	LOC_Os01g02900	LOC_Os01g02870
LOC_Os01g02900	LOC_Os01g10210	LOC_Os01g03020	LOC_Os01g04920
LOC_Os01g03020	LOC_Os01g10240	LOC_Os01g03870	LOC_Os01g07630
LOC_Os01g03320	LOC_Os01g10450	LOC_Os01g04280	LOC_Os01g09540
LOC_Os01g03330	LOC_Os01g12190	LOC_Os01g04530	LOC_Os01g10210
LOC_Os01g03340	LOC_Os01g12210	LOC_Os01g04540	LOC_Os01g10240
LOC_Os01g03390	LOC_Os01g13010	LOC_Os01g04550	LOC_Os01g10450
LOC_Os01g03870	LOC_Os01g13229	LOC_Os01g04750	LOC_Os01g12190
LOC_Os01g04280	LOC_Os01g13540	LOC_Os01g04800	LOC_Os01g12210
LOC_Os01g04530	LOC_Os01g14630	LOC_Os01g05060	LOC_Os01g13229
LOC_Os01g04540	LOC_Os01g31010	LOC_Os01g06520	LOC_Os01g13540
LOC_Os01g04550	LOC_Os01g31040	LOC_Os01g06640	LOC_Os01g14630
LOC_Os01g04750	LOC_Os01g32364	LOC_Os01g07970	LOC_Os01g32364
LOC_Os01g04770	LOC_Os01g40870	LOC_Os01g09010	LOC_Os01g40870
LOC_Os01g04800	LOC_Os01g43700	LOC_Os01g09100	LOC_Os01g43700
LOC_Os01g05060	LOC_Os01g45914	LOC_Os01g10990	LOC_Os01g46720
LOC_Os01g06520	LOC_Os01g46720	LOC_Os01g11160	LOC_Os01g47410
LOC_Os01g06640	LOC_Os01g47410	LOC_Os01g12710	LOC_Os01g49470
LOC_Os01g07970	LOC_Os01g49470	LOC_Os01g12760	LOC_Os01g50050
LOC_Os01g09010	LOC_Os01g50050	LOC_Os01g12770	LOC_Os01g50060
LOC_Os01g09100	LOC_Os01g50060	LOC_Os01g14410	LOC_Os01g50070
LOC_Os01g10990	LOC_Os01g50070	LOC_Os01g15000	LOC_Os01g50080
LOC_Os01g11160	LOC_Os01g50080	LOC_Os01g15530	LOC_Os01g51980
LOC_Os01g12710	LOC_Os01g51980	LOC_Os01g15540	LOC_Os01g52010
LOC_Os01g12760	LOC_Os01g52010	LOC_Os01g18584	LOC_Os01g56330
LOC_Os01g12770	LOC_Os01g56330	LOC_Os01g18670	LOC_Os01g58670
LOC_Os01g14410	LOC_Os01g58670	LOC_Os01g19820	LOC_Os01g59410
LOC_Os01g15000	LOC_Os01g59410	LOC_Os01g22249	LOC_Os01g62460
LOC_Os01g15190	LOC_Os01g62460	LOC_Os01g22370	LOC_Os01g65110
LOC_Os01g15270	LOC_Os01g65110	LOC_Os01g22900	LOC_Os01g65650
LOC_Os01g15530	LOC_Os01g65650	LOC_Os01g28450	LOC_Os01g70310
LOC_Os01g15540	LOC_Os01g70310	LOC_Os01g29330	LOC_Os01g71720
LOC_Os01g18584	LOC_Os01g71720	LOC_Os01g36070	LOC_Os01g72370
LOC_Os01g18670	LOC_Os01g72370	LOC_Os01g38530	LOC_Os01g72420
LOC_Os01g19820	LOC_Os01g72420	LOC_Os01g38610	LOC_Os02g02930
LOC_Os01g22249	LOC_Os02g02930	LOC_Os01g39330	LOC_Os02g04750
LOC_Os01g22270	LOC_Os02g04750	LOC_Os01g41240	LOC_Os02g04760
LOC_Os01g22370	LOC_Os02g04760	LOC_Os01g42410	LOC_Os02g05920
LOC_Os01g22900	LOC_Os02g05920	LOC_Os01g42790	LOC_Os02g07830
LOC_Os01g28450	LOC_Os02g07830	LOC_Os01g42860	LOC_Os02g10120
LOC_Os01g28790	LOC_Os02g10120	LOC_Os01g43750	LOC_Os02g17780
LOC_Os01g29330	LOC_Os02g11770	LOC_Os01g43760	LOC_Os02g21009
LOC_Os01g36070	LOC_Os02g17780	LOC_Os01g47070	LOC_Os02g27490
LOC_Os01g37350	LOC_Os02g21009	LOC_Os01g47330	LOC_Os02g36210
LOC_Os01g38530	LOC_Os02g27490	LOC_Os01g48000	LOC_Os02g36880
LOC_Os01g38610	LOC_Os02g36210	LOC_Os01g48610	LOC_Os02g40664
LOC_Os01g39330	LOC_Os02g36880	LOC_Os01g49320	LOC_Os02g48770
LOC_Os01g41240	LOC_Os02g40664	LOC_Os01g50910	LOC_Os02g56510
LOC_Os01g42410	LOC_Os02g43370	LOC_Os01g51060	LOC_Os03g02750
LOC_Os01g42790	LOC_Os02g48770	LOC_Os01g51570	LOC_Os03g03790
LOC_Os01g42860	LOC_Os02g56510	LOC_Os01g52070	LOC_Os03g05910
LOC_Os01g43750	LOC_Os03g02750	LOC_Os01g52240	LOC_Os03g08110
LOC_Os01g43760	LOC_Os03g03724	LOC_Os01g52710	LOC_Os03g08900
LOC_Os01g47070	LOC_Os03g03790	LOC_Os01g53090	LOC_Os03g09930
LOC_Os01g47330	LOC_Os03g05910	LOC_Os01g53730	LOC_Os03g11110
LOC_Os01g48000	LOC_Os03g08110	LOC_Os01g54540	LOC_Os03g12530
LOC_Os01g48610	LOC_Os03g08900	LOC_Os01g55240	LOC_Os03g12700
LOC_Os01g49320	LOC_Os03g09930	LOC_Os01g55290	LOC_Os03g12990
LOC_Os01g50910	LOC_Os03g11110	LOC_Os01g56450	LOC_Os03g13050
LOC_Os01g51060	LOC_Os03g12530	LOC_Os01g57073	LOC_Os03g13560
LOC_Os01g51570	LOC_Os03g12700	LOC_Os01g59000	LOC_Os03g22634
LOC_Os01g52070	LOC_Os03g12990	LOC_Os01g59060	LOC_Os03g26210
LOC_Os01g52240	LOC_Os03g13050	LOC_Os01g59840	LOC_Os03g31730
LOC_Os01g52710	LOC_Os03g13560	LOC_Os01g60020	LOC_Os03g32470
LOC_Os01g53090	LOC_Os03g18250	LOC_Os01g60860	LOC_Os03g44740
LOC_Os01g53730	LOC_Os03g22634	LOC_Os01g61080	LOC_Os03g46260
LOC_Os01g54540	LOC_Os03g26210	LOC_Os01g61230	LOC_Os03g46454
LOC_Os01g55240	LOC_Os03g31730	LOC_Os01g61510	LOC_Os03g48030
LOC_Os01g55290	LOC_Os03g32470	LOC_Os01g61990	LOC_Os03g52239
LOC_Os01g56450	LOC_Os03g32480	LOC_Os01g63690	LOC_Os03g54000
LOC_Os01g57073	LOC_Os03g38745	LOC_Os01g63930	LOC_Os03g55090
LOC_Os01g59000	LOC_Os03g43990	LOC_Os01g64110	LOC_Os03g56270
LOC_Os01g59060	LOC_Os03g44740	LOC_Os01g64120	LOC_Os03g58300
LOC_Os01g59840	LOC_Os03g46260	LOC_Os01g69870	LOC_Os03g60190
LOC_Os01g60020	LOC_Os03g46450	LOC_Os01g70770	LOC_Os03g62170
LOC_Os01g60860	LOC_Os03g46454	LOC_Os01g71340	LOC_Os03g62670
LOC_Os01g60930	LOC_Os03g48030	LOC_Os01g71350	LOC_Os03g63330
LOC_Os01g61080	LOC_Os03g51530	LOC_Os01g72170	LOC_Os04g12499
LOC_Os01g61230	LOC_Os03g52239	LOC_Os01g73170	LOC_Os04g12530
LOC_Os01g61510	LOC_Os03g54000	LOC_Os01g73200	LOC_Os04g15920
LOC_Os01g61990	LOC_Os03g55090	LOC_Os01g73500	LOC_Os04g18090
LOC_Os01g63690	LOC_Os03g56270	LOC_Os02g01510	LOC_Os04g21350
LOC_Os01g63930	LOC_Os03g56930	LOC_Os02g02400	LOC_Os04g22900
LOC_Os01g64110	LOC_Os03g56940	LOC_Os02g04230	LOC_Os04g33460
LOC_Os01g64120	LOC_Os03g58300	LOC_Os02g05470	LOC_Os04g33660
LOC_Os01g65904	LOC_Os03g60190	LOC_Os02g08100	LOC_Os04g34250
LOC_Os01g68740	LOC_Os03g62170	LOC_Os02g09490	LOC_Os04g34610
LOC_Os01g69870	LOC_Os03g62670	LOC_Os02g09810	LOC_Os04g35080
LOC_Os01g70770	LOC_Os03g63330	LOC_Os02g10660	LOC_Os04g35100
LOC_Os01g71340	LOC_Os04g05010	LOC_Os02g11980	LOC_Os04g38310
LOC_Os01g71350	LOC_Os04g10940	LOC_Os02g12010	LOC_Os04g43800
LOC_Os01g72170	LOC_Os04g12499	LOC_Os02g12030	LOC_Os04g48930
LOC_Os01g73170	LOC_Os04g12530	LOC_Os02g12040	LOC_Os04g49620
LOC_Os01g73200	LOC_Os04g15920	LOC_Os02g16060	LOC_Os04g53350
LOC_Os01g73500	LOC_Os04g16140	LOC_Os02g16270	LOC_Os04g57560
LOC_Os02g01510	LOC_Os04g18090	LOC_Os02g17360	LOC_Os05g05690
LOC_Os02g02400	LOC_Os04g21350	LOC_Os02g18070	LOC_Os05g06920
LOC_Os02g04230	LOC_Os04g21410	LOC_Os02g18080	LOC_Os05g11320
LOC_Os02g05470	LOC_Os04g22900	LOC_Os02g32370	LOC_Os05g12630
LOC_Os02g08100	LOC_Os04g32850	LOC_Os02g32520	LOC_Os05g12640
LOC_Os02g09490	LOC_Os04g33460	LOC_Os02g34790	LOC_Os05g24650
LOC_Os02g09810	LOC_Os04g33660	LOC_Os02g35320	LOC_Os05g25370
LOC_Os02g10660	LOC_Os04g34250	LOC_Os02g36140	LOC_Os05g26820
LOC_Os02g11859	LOC_Os04g34610	LOC_Os02g36440	LOC_Os05g32210
LOC_Os02g11980	LOC_Os04g35080	LOC_Os02g36450	LOC_Os05g35200
LOC_Os02g12010	LOC_Os04g35100	LOC_Os02g36619	LOC_Os05g39800
LOC_Os02g12030	LOC_Os04g38310	LOC_Os02g36940	LOC_Os05g45770
LOC_Os02g12040	LOC_Os04g43800	LOC_Os02g38040	LOC_Os05g47540
LOC_Os02g12654	LOC_Os04g48930	LOC_Os02g38840	LOC_Os05g47545
LOC_Os02g16060	LOC_Os04g49620	LOC_Os02g39850	LOC_Os05g47780
LOC_Os02g16080	LOC_Os04g50700	LOC_Os02g40500	LOC_Os05g49370
LOC_Os02g16270	LOC_Os04g53350	LOC_Os02g40784	LOC_Os05g51470
LOC_Os02g17360	LOC_Os04g55710	LOC_Os02g40840	LOC_Os05g51690
LOC_Os02g18070	LOC_Os04g57560	LOC_Os02g41630	LOC_Os06g02000
LOC_Os02g18080	LOC_Os05g02070	LOC_Os02g41840	LOC_Os06g03930
LOC_Os02g32370	LOC_Os05g05690	LOC_Os02g42440	LOC_Os06g04020
LOC_Os02g32520	LOC_Os05g06920	LOC_Os02g43330	LOC_Os06g05130
LOC_Os02g33060	LOC_Os05g11320	LOC_Os02g44880	LOC_Os06g08090
LOC_Os02g34380	LOC_Os05g12630	LOC_Os02g44980	LOC_Os06g10410
LOC_Os02g34790	LOC_Os05g12640	LOC_Os02g44990	LOC_Os06g12790
LOC_Os02g35320	LOC_Os05g24650	LOC_Os02g46850	LOC_Os06g14240
LOC_Os02g36140	LOC_Os05g25370	LOC_Os02g46860	LOC_Os06g18990
LOC_Os02g36440	LOC_Os05g26820	LOC_Os02g47840	LOC_Os06g20370
LOC_Os02g36450	LOC_Os05g32210	LOC_Os02g49720	LOC_Os06g30179
LOC_Os02g36619	LOC_Os05g35200	LOC_Os02g51890	LOC_Os06g34120
LOC_Os02g36940	LOC_Os05g39800	LOC_Os02g52210	LOC_Os06g35050
LOC_Os02g37834	LOC_Os05g45770	LOC_Os02g53750	LOC_Os06g35940
LOC_Os02g38040	LOC_Os05g46470	LOC_Os02g54254	LOC_Os06g36070
LOC_Os02g38840	LOC_Os05g47540	LOC_Os02g54360	LOC_Os06g47650
LOC_Os02g39850	LOC_Os05g47545	LOC_Os02g54980	LOC_Os06g49040
LOC_Os02g40500	LOC_Os05g47780	LOC_Os02g55610	LOC_Os06g49050
LOC_Os02g40784	LOC_Os05g48150	LOC_Os02g56300	LOC_Os07g04990
LOC_Os02g40840	LOC_Os05g49370	LOC_Os02g57560	LOC_Os07g07050
LOC_Os02g41630	LOC_Os05g51470	LOC_Os02g57670	LOC_Os07g09190
LOC_Os02g41840	LOC_Os05g51690	LOC_Os02g58120	LOC_Os07g15460
LOC_Os02g42440	LOC_Os06g02000	LOC_Os03g02550	LOC_Os07g23120
LOC_Os02g43330	LOC_Os06g03930	LOC_Os03g03034	LOC_Os07g30950
LOC_Os02g44300	LOC_Os06g04020	LOC_Os03g03360	LOC_Os07g34260
LOC_Os02g44880	LOC_Os06g05130	LOC_Os03g04020	LOC_Os07g37230
LOC_Os02g44980	LOC_Os06g05930	LOC_Os03g04060	LOC_Os07g40974
LOC_Os02g44990	LOC_Os06g08090	LOC_Os03g04470	LOC_Os07g42994
LOC_Os02g46850	LOC_Os06g10410	LOC_Os03g05620	LOC_Os07g43390
LOC_Os02g46860	LOC_Os06g11070	LOC_Os03g05900	LOC_Os07g46920
LOC_Os02g47840	LOC_Os06g12790	LOC_Os03g06200	LOC_Os07g48690
LOC_Os02g49720	LOC_Os06g14240	LOC_Os03g07570	LOC_Os07g49110
LOC_Os02g51890	LOC_Os06g18990	LOC_Os03g08470	LOC_Os08g01770
LOC_Os02g52210	LOC_Os06g20370	LOC_Os03g08490	LOC_Os08g04300
LOC_Os02g53750	LOC_Os06g30179	LOC_Os03g08500	LOC_Os08g04500
LOC_Os02g54254	LOC_Os06g34120	LOC_Os03g08624	LOC_Os08g05280
LOC_Os02g54360	LOC_Os06g34730	LOC_Os03g08999	LOC_Os08g07080
LOC_Os02g54980	LOC_Os06g35050	LOC_Os03g09020	LOC_Os08g08140
LOC_Os02g55610	LOC_Os06g35940	LOC_Os03g09060	LOC_Os08g13390
LOC_Os02g56300	LOC_Os06g36070	LOC_Os03g09900	LOC_Os08g31630
LOC_Os02g57560	LOC_Os06g47650	LOC_Os03g10620	LOC_Os08g36480
LOC_Os02g57670	LOC_Os06g48180	LOC_Os03g10950	LOC_Os08g43390
LOC_Os02g58120	LOC_Os06g49040	LOC_Os03g12470	LOC_Os08g43400
LOC_Os03g02550	LOC_Os06g49050	LOC_Os03g12500	LOC_Os09g02270
LOC_Os03g03034	LOC_Os07g01890	LOC_Os03g12890	LOC_Os09g04339
LOC_Os03g03360	LOC_Os07g02460	LOC_Os03g16350	LOC_Os09g07120
LOC_Os03g04020	LOC_Os07g04930	LOC_Os03g16390	LOC_Os09g09930
LOC_Os03g04060	LOC_Os07g04980	LOC_Os03g16950	LOC_Os09g12290
LOC_Os03g04470	LOC_Os07g04990	LOC_Os03g16960	LOC_Os09g12660
LOC_Os03g05620	LOC_Os07g07050	LOC_Os03g17690	LOC_Os09g17600
LOC_Os03g05900	LOC_Os07g08710	LOC_Os03g17700	LOC_Os09g25620
LOC_Os03g06200	LOC_Os07g09190	LOC_Os03g17790	LOC_Os09g25625
LOC_Os03g07570	LOC_Os07g15460	LOC_Os03g18130	LOC_Os09g25810
LOC_Os03g08470	LOC_Os07g23120	LOC_Os03g18600	LOC_Os09g27820
LOC_Os03g08490	LOC_Os07g30950	LOC_Os03g19010	LOC_Os09g28620
LOC_Os03g08500	LOC_Os07g34150	LOC_Os03g19700	LOC_Os09g30130
LOC_Os03g08624	LOC_Os07g34260	LOC_Os03g19990	LOC_Os09g30380
LOC_Os03g08999	LOC_Os07g37230	LOC_Os03g20090	LOC_Os09g34180
LOC_Os03g09020	LOC_Os07g40974	LOC_Os03g20420	LOC_Os09g34890
LOC_Os03g09060	LOC_Os07g42730	LOC_Os03g20840	LOC_Os09g36680
LOC_Os03g09900	LOC_Os07g42994	LOC_Os03g21230	LOC_Os09g36930
LOC_Os03g10620	LOC_Os07g43390	LOC_Os03g22790	LOC_Os09g37394
LOC_Os03g10950	LOC_Os07g46920	LOC_Os03g24730	LOC_Os09g37710
LOC_Os03g12470	LOC_Os07g48690	LOC_Os03g29190	LOC_Os09g37910
LOC_Os03g12500	LOC_Os07g49110	LOC_Os03g29410	LOC_Os10g02220
LOC_Os03g12890	LOC_Os08g01770	LOC_Os03g29540	LOC_Os10g14870
LOC_Os03g16350	LOC_Os08g04300	LOC_Os03g31150	LOC_Os10g21396
LOC_Os03g16390	LOC_Os08g04430	LOC_Os03g31750	LOC_Os10g33440
LOC_Os03g16950	LOC_Os08g04500	LOC_Os03g40194	LOC_Os10g34790
LOC_Os03g16960	LOC_Os08g05280	LOC_Os03g45390	LOC_Os10g36000
LOC_Os03g17690	LOC_Os08g07080	LOC_Os03g45400	LOC_Os10g41060
LOC_Os03g17700	LOC_Os08g07490	LOC_Os03g46070	LOC_Os10g41260
LOC_Os03g17790	LOC_Os08g08140	LOC_Os03g46200	LOC_Os10g42800
LOC_Os03g18130	LOC_Os08g13390	LOC_Os03g49350	LOC_Os11g01330
LOC_Os03g18600	LOC_Os08g13500	LOC_Os03g49440	LOC_Os11g02520
LOC_Os03g19010	LOC_Os08g16820	LOC_Os03g55010	LOC_Os11g04150
LOC_Os03g19700	LOC_Os08g16830	LOC_Os03g55070	LOC_Os11g16420
LOC_Os03g19990	LOC_Os08g22590	LOC_Os03g55164	LOC_Os11g18366
LOC_Os03g20090	LOC_Os08g31630	LOC_Os03g55720	LOC_Os11g22350
LOC_Os03g20420	LOC_Os08g36480	LOC_Os03g55970	LOC_Os11g26880
LOC_Os03g20840	LOC_Os08g43390	LOC_Os03g55980	LOC_Os11g29720
LOC_Os03g21230	LOC_Os08g43400	LOC_Os03g55990	LOC_Os11g34110
LOC_Os03g22790	LOC_Os09g02270	LOC_Os03g56250	LOC_Os11g39990
LOC_Os03g24730	LOC_Os09g04339	LOC_Os03g57310	LOC_Os12g01360
LOC_Os03g25150	LOC_Os09g04360	LOC_Os03g57680	LOC_Os12g02810
LOC_Os03g29190	LOC_Os09g07120	LOC_Os03g58790	LOC_Os12g02980
LOC_Os03g29410	LOC_Os09g07180	LOC_Os03g58980	LOC_Os12g03899
LOC_Os03g29540	LOC_Os09g07230	LOC_Os03g60080	LOC_Os12g08220
LOC_Os03g31150	LOC_Os09g09930	LOC_Os03g60100	LOC_Os12g08760
LOC_Os03g31750	LOC_Os09g12290	LOC_Os03g60260	LOC_Os12g18770
LOC_Os03g40194	LOC_Os09g12660	LOC_Os03g61150	LOC_Os12g22284
LOC_Os03g40210	LOC_Os09g17600	LOC_Os03g61260	LOC_Os12g25490
LOC_Os03g42600	LOC_Os09g24620	LOC_Os03g62690	LOC_Os12g41200
LOC_Os03g45390	LOC_Os09g25620	LOC_Os03g63310	LOC_Os12g42280
LOC_Os03g45400	LOC_Os09g25625	LOC_Os03g63700	LOC_Os12g42400
LOC_Os03g46070	LOC_Os09g25810	LOC_Os03g63900
LOC_Os03g46200	LOC_Os09g27820	LOC_Os04g12960
LOC_Os03g49350	LOC_Os09g28620	LOC_Os04g16820
LOC_Os03g49440	LOC_Os09g30130	LOC_Os04g16830
LOC_Os03g55010	LOC_Os09g30380	LOC_Os04g21790
LOC_Os03g55070	LOC_Os09g34180	LOC_Os04g21820
LOC_Os03g55164	LOC_Os09g34890	LOC_Os04g22120
LOC_Os03g55720	LOC_Os09g36680	LOC_Os04g24220
LOC_Os03g55970	LOC_Os09g36930	LOC_Os04g24290
LOC_Os03g55980	LOC_Os09g37394	LOC_Os04g29770
LOC_Os03g55990	LOC_Os09g37710	LOC_Os04g29790
LOC_Os03g56250	LOC_Os09g37910	LOC_Os04g29810
LOC_Os03g57310	LOC_Os10g02220	LOC_Os04g30030
LOC_Os03g57680	LOC_Os10g08820	LOC_Os04g30060
LOC_Os03g58790	LOC_Os10g14870	LOC_Os04g30110
LOC_Os03g58980	LOC_Os10g21396	LOC_Os04g30160
LOC_Os03g60080	LOC_Os10g33440	LOC_Os04g30240
LOC_Os03g60100	LOC_Os10g34790	LOC_Os04g30250
LOC_Os03g60260	LOC_Os10g36000	LOC_Os04g30330
LOC_Os03g60840	LOC_Os10g41060	LOC_Os04g30340
LOC_Os03g61150	LOC_Os10g41260	LOC_Os04g32110
LOC_Os03g61260	LOC_Os10g42800	LOC_Os04g32740
LOC_Os03g61910	LOC_Os11g01330	LOC_Os04g32920
LOC_Os03g62690	LOC_Os11g02520	LOC_Os04g33240
LOC_Os03g63310	LOC_Os11g04150	LOC_Os04g33610
LOC_Os03g63700	LOC_Os11g15624	LOC_Os04g34360
LOC_Os03g63900	LOC_Os11g16420	LOC_Os04g35130
LOC_Os04g12960	LOC_Os11g18366	LOC_Os04g35540
LOC_Os04g16820	LOC_Os11g22350	LOC_Os04g36800
LOC_Os04g16830	LOC_Os11g26880	LOC_Os04g37740
LOC_Os04g18690	LOC_Os11g29720	LOC_Os04g37790
LOC_Os04g21790	LOC_Os11g34110	LOC_Os04g38530
LOC_Os04g21820	LOC_Os11g39990	LOC_Os04g38680
LOC_Os04g22120	LOC_Os12g01360	LOC_Os04g39300
LOC_Os04g24220	LOC_Os12g02810	LOC_Os04g39320
LOC_Os04g24290	LOC_Os12g02980	LOC_Os04g39350
LOC_Os04g27910	LOC_Os12g03899	LOC_Os04g39880
LOC_Os04g29550	LOC_Os12g08220	LOC_Os04g40470
LOC_Os04g29770	LOC_Os12g08760	LOC_Os04g40630
LOC_Os04g29790	LOC_Os12g18770	LOC_Os04g40990
LOC_Os04g29810	LOC_Os12g22284	LOC_Os04g41229
LOC_Os04g30030	LOC_Os12g25490	LOC_Os04g42250
LOC_Os04g30060	LOC_Os12g41200	LOC_Os04g43200
LOC_Os04g30090	LOC_Os12g42280	LOC_Os04g43410
LOC_Os04g30110	LOC_Os12g42400	LOC_Os04g43440
LOC_Os04g30160		LOC_Os04g43550
LOC_Os04g30240		LOC_Os04g44354
LOC_Os04g30250		LOC_Os04g44500
LOC_Os04g30330		LOC_Os04g45090
LOC_Os04g30340		LOC_Os04g47190
LOC_Os04g32110		LOC_Os04g47780
LOC_Os04g32740		LOC_Os04g48270
LOC_Os04g32920		LOC_Os04g49160
LOC_Os04g33240		LOC_Os04g49194
LOC_Os04g33610		LOC_Os04g49370
LOC_Os04g34360		LOC_Os04g49748
LOC_Os04g35130		LOC_Os04g51030
LOC_Os04g35540		LOC_Os04g52100
LOC_Os04g36800		LOC_Os04g52640
LOC_Os04g37740		LOC_Os04g52670
LOC_Os04g37790		LOC_Os04g52810
LOC_Os04g38530		LOC_Os04g53120
LOC_Os04g38680		LOC_Os04g53850
LOC_Os04g39300		LOC_Os04g54080
LOC_Os04g39320		LOC_Os04g54310
LOC_Os04g39350		LOC_Os04g56910
LOC_Os04g39880		LOC_Os04g58280
LOC_Os04g40470		LOC_Os04g59150
LOC_Os04g40630		LOC_Os04g59190
LOC_Os04g40990		LOC_Os04g59200
LOC_Os04g41229		LOC_Os04g59480
LOC_Os04g42250		LOC_Os05g04584
LOC_Os04g43200		LOC_Os05g05680
LOC_Os04g43410		LOC_Os05g07940
LOC_Os04g43440		LOC_Os05g08620
LOC_Os04g43550		LOC_Os05g08750
LOC_Os04g44354		LOC_Os05g09020
LOC_Os04g44500		LOC_Os05g09500
LOC_Os04g45090		LOC_Os05g15770
LOC_Os04g47190		LOC_Os05g17604
LOC_Os04g47780		LOC_Os05g19910
LOC_Os04g48270		LOC_Os05g25390
LOC_Os04g49160		LOC_Os05g25770
LOC_Os04g49194		LOC_Os05g26040
LOC_Os04g49370		LOC_Os05g27660
LOC_Os04g49748		LOC_Os05g27780
LOC_Os04g51030		LOC_Os05g28740
LOC_Os04g52100		LOC_Os05g30010
LOC_Os04g52640		LOC_Os05g31160
LOC_Os04g52670		LOC_Os05g34854
LOC_Os04g52810		LOC_Os05g35290
LOC_Os04g53120		LOC_Os05g35650
LOC_Os04g53850		LOC_Os05g37520
LOC_Os04g54080		LOC_Os05g39260
LOC_Os04g54310		LOC_Os05g39720
LOC_Os04g56100		LOC_Os05g43390
LOC_Os04g56910		LOC_Os05g44100
LOC_Os04g58280		LOC_Os05g45020
LOC_Os04g58734		LOC_Os05g46020
LOC_Os04g58890		LOC_Os05g46460
LOC_Os04g59150		LOC_Os05g47660
LOC_Os04g59190		LOC_Os05g47750
LOC_Os04g59200		LOC_Os05g48340
LOC_Os04g59480		LOC_Os05g50090
LOC_Os05g04584		LOC_Os05g50190
LOC_Os05g05680		LOC_Os05g50380
LOC_Os05g07940		LOC_Os06g02019
LOC_Os05g08420		LOC_Os06g02540
LOC_Os05g08620		LOC_Os06g03830
LOC_Os05g08750		LOC_Os06g04150
LOC_Os05g09020		LOC_Os06g07030
LOC_Os05g09500		LOC_Os06g07200
LOC_Os05g09580		LOC_Os06g07600
LOC_Os05g15770		LOC_Os06g09260
LOC_Os05g17604		LOC_Os06g09679
LOC_Os05g19910		LOC_Os06g13560
LOC_Os05g25390		LOC_Os06g15330
LOC_Os05g25770		LOC_Os06g15370
LOC_Os05g26040		LOC_Os06g19070
LOC_Os05g27660		LOC_Os06g19370
LOC_Os05g27670		LOC_Os06g19590
LOC_Os05g27780		LOC_Os06g20150
LOC_Os05g28740		LOC_Os06g20200
LOC_Os05g30010		LOC_Os06g20960
LOC_Os05g31160		LOC_Os06g22919
LOC_Os05g34854		LOC_Os06g24990
LOC_Os05g35290		LOC_Os06g25010
LOC_Os05g35650		LOC_Os06g35520
LOC_Os05g36040		LOC_Os06g36560
LOC_Os05g37520		LOC_Os06g38830
LOC_Os05g39260		LOC_Os06g39712
LOC_Os05g39720		LOC_Os06g39750
LOC_Os05g43390		LOC_Os06g41020
LOC_Os05g44100		LOC_Os06g44170
LOC_Os05g45020		LOC_Os06g45140
LOC_Os05g46020		LOC_Os06g46340
LOC_Os05g46460		LOC_Os06g46950
LOC_Os05g47660		LOC_Os06g48250
LOC_Os05g47750		LOC_Os06g48300
LOC_Os05g48340		LOC_Os06g49250
LOC_Os05g49060		LOC_Os06g49390
LOC_Os05g50090		LOC_Os06g50040
LOC_Os05g50190		LOC_Os06g51060
LOC_Os05g50380		LOC_Os07g03710
LOC_Os06g01030		LOC_Os07g03730
LOC_Os06g01760		LOC_Os07g03740
LOC_Os06g02019		LOC_Os07g04040
LOC_Os06g02540		LOC_Os07g06800
LOC_Os06g03830		LOC_Os07g06850
LOC_Os06g04150		LOC_Os07g08150
LOC_Os06g07030		LOC_Os07g09010
LOC_Os06g07200		LOC_Os07g09420
LOC_Os06g07600		LOC_Os07g12640
LOC_Os06g09260		LOC_Os07g14150
LOC_Os06g09679		LOC_Os07g32590
LOC_Os06g09980		LOC_Os07g33580
LOC_Os06g13560		LOC_Os07g33610
LOC_Os06g15280		LOC_Os07g34520
LOC_Os06g15330		LOC_Os07g34850
LOC_Os06g15370		LOC_Os07g35310
LOC_Os06g19070		LOC_Os07g35330
LOC_Os06g19370		LOC_Os07g35340
LOC_Os06g19590		LOC_Os07g35370
LOC_Os06g20150		LOC_Os07g35390
LOC_Os06g20200		LOC_Os07g35480
LOC_Os06g20900		LOC_Os07g35540
LOC_Os06g20960		LOC_Os07g35560
LOC_Os06g22919		LOC_Os07g35750
LOC_Os06g24990		LOC_Os07g35810
LOC_Os06g25010		LOC_Os07g36800
LOC_Os06g35520		LOC_Os07g37320
LOC_Os06g36560		LOC_Os07g38430
LOC_Os06g38830		LOC_Os07g40000
LOC_Os06g39712		LOC_Os07g41230
LOC_Os06g39750		LOC_Os07g42510
LOC_Os06g39752		LOC_Os07g43800
LOC_Os06g41020		LOC_Os07g43810
LOC_Os06g44170		LOC_Os07g46030
LOC_Os06g45130		LOC_Os07g46060
LOC_Os06g45140		LOC_Os07g46852
LOC_Os06g46149		LOC_Os07g47670
LOC_Os06g46340		LOC_Os07g47990
LOC_Os06g46950		LOC_Os07g48020
LOC_Os06g48250		LOC_Os07g48450
LOC_Os06g48300		LOC_Os07g48510
LOC_Os06g48500		LOC_Os07g48550
LOC_Os06g49250		LOC_Os08g02230
LOC_Os06g49390		LOC_Os08g02640
LOC_Os06g49420		LOC_Os08g02700
LOC_Os06g50040		LOC_Os08g05320
LOC_Os06g51060		LOC_Os08g07100
LOC_Os07g03710		LOC_Os08g09200
LOC_Os07g03720		LOC_Os08g10290
LOC_Os07g03730		LOC_Os08g10310
LOC_Os07g03740		LOC_Os08g10320
LOC_Os07g04040		LOC_Os08g13440
LOC_Os07g06800		LOC_Os08g15270
LOC_Os07g06850		LOC_Os08g15306
LOC_Os07g08150		LOC_Os08g15710
LOC_Os07g09010		LOC_Os08g15780
LOC_Os07g09420		LOC_Os08g16050
LOC_Os07g12640		LOC_Os08g24310
LOC_Os07g13360		LOC_Os08g29020
LOC_Os07g14150		LOC_Os08g29570
LOC_Os07g23980		LOC_Os08g30770
LOC_Os07g32590		LOC_Os08g33350
LOC_Os07g33580		LOC_Os08g33440
LOC_Os07g33610		LOC_Os08g34150
LOC_Os07g34520		LOC_Os08g37670
LOC_Os07g34850		LOC_Os08g38710
LOC_Os07g35310		LOC_Os08g39600
LOC_Os07g35330		LOC_Os08g39660
LOC_Os07g35340		LOC_Os08g39694
LOC_Os07g35370		LOC_Os08g39730
LOC_Os07g35390		LOC_Os08g39840
LOC_Os07g35480		LOC_Os08g40430
LOC_Os07g35540		LOC_Os08g40680
LOC_Os07g35560		LOC_Os08g40690
LOC_Os07g35750		LOC_Os08g41990
LOC_Os07g35810		LOC_Os08g42910
LOC_Os07g36800		LOC_Os08g43550
LOC_Os07g37320		LOC_Os09g04160
LOC_Os07g38430		LOC_Os09g10760
LOC_Os07g39980		LOC_Os09g11460
LOC_Os07g40000		LOC_Os09g11480
LOC_Os07g41230		LOC_Os09g15050
LOC_Os07g42510		LOC_Os09g16950
LOC_Os07g43800		LOC_Os09g17560
LOC_Os07g43810		LOC_Os09g17810
LOC_Os07g46030		LOC_Os09g18020
LOC_Os07g46060		LOC_Os09g18159
LOC_Os07g46852		LOC_Os09g18260
LOC_Os07g47670		LOC_Os09g18360
LOC_Os07g47990		LOC_Os09g19830
LOC_Os07g48020		LOC_Os09g19952
LOC_Os07g48450		LOC_Os09g19954
LOC_Os07g48510		LOC_Os09g24580
LOC_Os07g48550		LOC_Os09g27010
LOC_Os08g02230		LOC_Os09g27950
LOC_Os08g02640		LOC_Os09g28180
LOC_Os08g02700		LOC_Os09g28210
LOC_Os08g05320		LOC_Os09g28354
LOC_Os08g07100		LOC_Os09g29540
LOC_Os08g09200		LOC_Os09g29560
LOC_Os08g10290		LOC_Os09g31200
LOC_Os08g10310		LOC_Os09g31478
LOC_Os08g10320		LOC_Os09g32290
LOC_Os08g10500		LOC_Os09g32330
LOC_Os08g13440		LOC_Os09g34214
LOC_Os08g15270		LOC_Os09g35580
LOC_Os08g15306		LOC_Os09g36200
LOC_Os08g15650		LOC_Os09g37330
LOC_Os08g15710		LOC_Os09g37540
LOC_Os08g15780		LOC_Os09g39770
LOC_Os08g16050		LOC_Os10g02070
LOC_Os08g24310		LOC_Os10g03850
LOC_Os08g26230		LOC_Os10g04490
LOC_Os08g29020		LOC_Os10g05250
LOC_Os08g29570		LOC_Os10g12050
LOC_Os08g30510		LOC_Os10g12080
LOC_Os08g30770		LOC_Os10g17489
LOC_Os08g33350		LOC_Os10g21194
LOC_Os08g33440		LOC_Os10g21300
LOC_Os08g34150		LOC_Os10g21314
LOC_Os08g37670		LOC_Os10g21346
LOC_Os08g38710		LOC_Os10g21418
LOC_Os08g39600		LOC_Os10g21590
LOC_Os08g39660		LOC_Os10g23050
LOC_Os08g39694		LOC_Os10g25290
LOC_Os08g39730		LOC_Os10g25550
LOC_Os08g39840		LOC_Os10g28350
LOC_Os08g40430		LOC_Os10g30450
LOC_Os08g40680		LOC_Os10g31850
LOC_Os08g40690		LOC_Os10g33040
LOC_Os08g41990		LOC_Os10g33080
LOC_Os08g42910		LOC_Os10g33130
LOC_Os08g43550		LOC_Os10g33210
LOC_Os09g04160		LOC_Os10g34350
LOC_Os09g10760		LOC_Os10g34910
LOC_Os09g11460		LOC_Os10g35460
LOC_Os09g11480		LOC_Os10g36480
LOC_Os09g13440		LOC_Os10g37340
LOC_Os09g15050		LOC_Os10g38360
LOC_Os09g16950		LOC_Os10g38489
LOC_Os09g17560		LOC_Os10g39100
LOC_Os09g17810		LOC_Os10g39680
LOC_Os09g18020		LOC_Os10g39700
LOC_Os09g18040		LOC_Os10g40640
LOC_Os09g18159		LOC_Os10g40934
LOC_Os09g18260		LOC_Os10g41330
LOC_Os09g18360		LOC_Os10g41550
LOC_Os09g19830		LOC_Os10g43060
LOC_Os09g19952		LOC_Os11g03300
LOC_Os09g19954		LOC_Os11g03370
LOC_Os09g22360		LOC_Os11g03820
LOC_Os09g24580		LOC_Os11g04560
LOC_Os09g25740		LOC_Os11g05800
LOC_Os09g27010		LOC_Os11g07120
LOC_Os09g27950		LOC_Os11g07200
LOC_Os09g28180		LOC_Os11g07440
LOC_Os09g28210		LOC_Os11g07960
LOC_Os09g28354		LOC_Os11g10120
LOC_Os09g29540		LOC_Os11g11940
LOC_Os09g29560		LOC_Os11g11960
LOC_Os09g31200		LOC_Os11g12340
LOC_Os09g31478		LOC_Os11g15040
LOC_Os09g32290		LOC_Os11g17380
LOC_Os09g32330		LOC_Os11g29710
LOC_Os09g34214		LOC_Os11g29870
LOC_Os09g35580		LOC_Os11g31190
LOC_Os09g36200		LOC_Os11g31900
LOC_Os09g36600		LOC_Os11g32500
LOC_Os09g37330		LOC_Os11g33970
LOC_Os09g37540		LOC_Os11g34920
LOC_Os09g39770		LOC_Os11g36200
LOC_Os10g02070		LOC_Os11g37950
LOC_Os10g03840		LOC_Os11g38870
LOC_Os10g03850		LOC_Os11g44960
LOC_Os10g04490		LOC_Os11g44990
LOC_Os10g05250		LOC_Os11g45050
LOC_Os10g12050		LOC_Os11g45130
LOC_Os10g12080		LOC_Os11g45190
LOC_Os10g17489		LOC_Os11g45740
LOC_Os10g19970		LOC_Os11g47560
LOC_Os10g21194		LOC_Os11g47600
LOC_Os10g21272		LOC_Os11g47680
LOC_Os10g21300		LOC_Os12g01490
LOC_Os10g21314		LOC_Os12g03040
LOC_Os10g21346		LOC_Os12g04360
LOC_Os10g21418		LOC_Os12g04440
LOC_Os10g21590		LOC_Os12g04990
LOC_Os10g23050		LOC_Os12g10590
LOC_Os10g24450		LOC_Os12g17160
LOC_Os10g25290		LOC_Os12g19030
LOC_Os10g25550		LOC_Os12g24020
LOC_Os10g28080		LOC_Os12g24320
LOC_Os10g28120		LOC_Os12g24650
LOC_Os10g28350		LOC_Os12g26470
LOC_Os10g30450		LOC_Os12g28550
LOC_Os10g31850		LOC_Os12g29330
LOC_Os10g33040		LOC_Os12g30180
LOC_Os10g33080		LOC_Os12g32280
LOC_Os10g33130		LOC_Os12g35340
LOC_Os10g33210		LOC_Os12g36110
LOC_Os10g34350		LOC_Os12g36940
LOC_Os10g34910		LOC_Os12g38150
LOC_Os10g34940		LOC_Os12g38170
LOC_Os10g35460		LOC_Os12g38770
LOC_Os10g36480		LOC_Os12g41680
LOC_Os10g37340		LOC_Os12g43410
LOC_Os10g38360		LOC_Os12g44030
LOC_Os10g38489		LOC_Os12g44050
LOC_Os10g39100
LOC_Os10g39680
LOC_Os10g39700
LOC_Os10g40640
LOC_Os10g40934
LOC_Os10g41330
LOC_Os10g41550
LOC_Os10g41980
LOC_Os10g42340
LOC_Os10g43060
LOC_Os11g03300
LOC_Os11g03370
LOC_Os11g03820
LOC_Os11g04560
LOC_Os11g05800
LOC_Os11g07120
LOC_Os11g07200
LOC_Os11g07440
LOC_Os11g07960
LOC_Os11g10120
LOC_Os11g11940
LOC_Os11g11960
LOC_Os11g12340
LOC_Os11g15040
LOC_Os11g17380
LOC_Os11g17390
LOC_Os11g25690
LOC_Os11g29710
LOC_Os11g29870
LOC_Os11g31190
LOC_Os11g31900
LOC_Os11g32500
LOC_Os11g33970
LOC_Os11g34920
LOC_Os11g36200
LOC_Os11g37950
LOC_Os11g38870
LOC_Os11g42970
LOC_Os11g44960
LOC_Os11g44990
LOC_Os11g45050
LOC_Os11g45130
LOC_Os11g45190
LOC_Os11g45740
LOC_Os11g47560
LOC_Os11g47600
LOC_Os11g47680
LOC_Os12g01490
LOC_Os12g03040
LOC_Os12g04360
LOC_Os12g04440
LOC_Os12g04990
LOC_Os12g07310
LOC_Os12g08790
LOC_Os12g10590
LOC_Os12g16450
LOC_Os12g17160
LOC_Os12g19030
LOC_Os12g24020
LOC_Os12g24320
LOC_Os12g24650
LOC_Os12g26470
LOC_Os12g28550
LOC_Os12g29330
LOC_Os12g30170
LOC_Os12g30180
LOC_Os12g32280
LOC_Os12g32390
LOC_Os12g33130
LOC_Os12g35340
LOC_Os12g36110
LOC_Os12g36830
LOC_Os12g36940
LOC_Os12g38150
LOC_Os12g38170
LOC_Os12g38770
LOC_Os12g40180
LOC_Os12g41680
LOC_Os12g43410
LOC_Os12g44030
LOC_Os12g44050

## Sheet: GO
BP_up	CC_up	MF_up		BP_down	CC_down	MF_down
LOC_Os01g02390	LOC_Os01g19820	LOC_Os07g09420		LOC_Os01g04920	LOC_Os02g27490	LOC_Os03g26210
LOC_Os01g02550	LOC_Os01g71350	LOC_Os07g35750		LOC_Os01g50050	LOC_Os02g04760	LOC_Os01g62460
LOC_Os01g02810	LOC_Os01g04800	LOC_Os08g10310		LOC_Os02g48770	LOC_Os02g17780	LOC_Os01g70310
LOC_Os01g02900	LOC_Os01g61080	LOC_Os08g10290		LOC_Os02g04750	LOC_Os01g10450	LOC_Os01g72370
LOC_Os01g03020	LOC_Os01g29330	LOC_Os08g09200		LOC_Os02g36210	LOC_Os02g36210	LOC_Os02g36880
LOC_Os01g03870	LOC_Os01g38530	LOC_Os07g35370		LOC_Os02g17780	LOC_Os02g21009	LOC_Os01g13540
LOC_Os01g04530	LOC_Os01g39330	LOC_Os08g10320		LOC_Os02g04760	LOC_Os01g72370	LOC_Os03g52239
LOC_Os01g04540	LOC_Os01g12710	LOC_Os08g29020		LOC_Os02g10120	LOC_Os03g13560	LOC_Os04g18090
LOC_Os01g04550	LOC_Os01g50910	LOC_Os07g35330		LOC_Os01g14630	LOC_Os01g32364	LOC_Os09g07120
LOC_Os01g04750	LOC_Os01g03020	LOC_Os07g38430		LOC_Os02g02930	LOC_Os03g26210	LOC_Os10g36000
LOC_Os01g04800	LOC_Os02g02400	LOC_Os07g35340		LOC_Os03g22634	LOC_Os04g18090	LOC_Os10g41260
LOC_Os01g06520	LOC_Os01g22900	LOC_Os07g35310		LOC_Os06g05130	LOC_Os01g13229	LOC_Os12g42400
LOC_Os01g06640	LOC_Os01g48610	LOC_Os08g33350		LOC_Os05g47540	LOC_Os03g52239	LOC_Os11g02520
LOC_Os01g09010	LOC_Os01g51570	LOC_Os07g35810		LOC_Os07g07050	LOC_Os03g62170	LOC_Os09g37710
LOC_Os01g09100	LOC_Os01g05060	LOC_Os09g10760		LOC_Os04g35100	LOC_Os01g47410	LOC_Os09g36680
LOC_Os01g11160	LOC_Os01g22249	LOC_Os07g35540		LOC_Os08g04500	LOC_Os02g04750	LOC_Os09g37910
LOC_Os01g12710	LOC_Os01g22370	LOC_Os08g24310		LOC_Os07g09190	LOC_Os01g09540	LOC_Os08g43400
LOC_Os01g12760	LOC_Os01g51060	LOC_Os11g34920		LOC_Os06g34120	LOC_Os01g12210	LOC_Os03g56270
LOC_Os01g12770	LOC_Os01g60860	LOC_Os11g17380		LOC_Os05g47545	LOC_Os01g70310	LOC_Os03g12990
LOC_Os01g14410	LOC_Os01g64120	LOC_Os11g11960		LOC_Os01g65650	LOC_Os03g48030	LOC_Os02g04750
LOC_Os01g15000	LOC_Os01g70770	LOC_Os09g28180		LOC_Os02g05920	LOC_Os01g59410	LOC_Os02g05920
LOC_Os01g15540	LOC_Os01g72170	LOC_Os11g12340		LOC_Os03g26210	LOC_Os02g10120	LOC_Os03g55090
LOC_Os01g18584	LOC_Os01g47330	LOC_Os11g07200		LOC_Os01g49470	LOC_Os04g12530	LOC_Os01g46720
LOC_Os01g18670	LOC_Os01g03870	LOC_Os09g19830		LOC_Os02g56510	LOC_Os01g14630	LOC_Os01g47410
LOC_Os01g19820	LOC_Os01g61230	LOC_Os10g33080		LOC_Os01g50080	LOC_Os03g46454	LOC_Os02g48770
LOC_Os01g22249	LOC_Os01g59060	LOC_Os11g36200		LOC_Os03g56270	LOC_Os03g62670	LOC_Os04g15920
LOC_Os01g22370	LOC_Os01g18670	LOC_Os11g07120		LOC_Os03g52239	LOC_Os01g04920	LOC_Os03g32470
LOC_Os01g22900	LOC_Os01g04750	LOC_Os10g05250		LOC_Os02g36880	LOC_Os03g58300	LOC_Os03g62670
LOC_Os01g28450	LOC_Os01g54540	LOC_Os10g04490		LOC_Os01g56330	LOC_Os01g50050	LOC_Os01g50050
LOC_Os01g36070	LOC_Os01g53730	LOC_Os10g33130		LOC_Os03g02750	LOC_Os01g46720	LOC_Os01g04920
LOC_Os01g38530	LOC_Os01g52070	LOC_Os10g33040		LOC_Os03g08900	LOC_Os02g48770	LOC_Os01g50070
LOC_Os01g38610	LOC_Os01g73200	LOC_Os11g11940		LOC_Os01g70310	LOC_Os02g05920	LOC_Os02g02930
LOC_Os01g39330	LOC_Os01g73170	LOC_Os11g03820		LOC_Os03g31730	LOC_Os01g62460	LOC_Os03g22634
LOC_Os01g41240	LOC_Os01g15540	LOC_Os01g18584		LOC_Os03g32470	LOC_Os03g55090	LOC_Os01g50080
LOC_Os01g42410	LOC_Os02g01510	LOC_Os01g04750		LOC_Os03g12990	LOC_Os04g12499	LOC_Os03g02750
LOC_Os01g42790	LOC_Os01g38610	LOC_Os01g06640		LOC_Os03g05910	LOC_Os05g35200	LOC_Os01g14630
LOC_Os01g42860	LOC_Os01g52240	LOC_Os01g60020		LOC_Os01g72370	LOC_Os07g07050	LOC_Os02g40664
LOC_Os01g43750	LOC_Os01g06640	LOC_Os01g38530		LOC_Os03g46454	LOC_Os07g08710	LOC_Os02g10120
LOC_Os01g43760	LOC_Os01g60020	LOC_Os01g09100		LOC_Os04g18090	LOC_Os04g43800	LOC_Os01g40870
LOC_Os01g47070	LOC_Os08g02640	LOC_Os01g61080		LOC_Os01g47410	LOC_Os04g38310	LOC_Os01g52010
LOC_Os01g47330	LOC_Os07g09420	LOC_Os01g38610		LOC_Os03g55090	LOC_Os06g02000	LOC_Os03g08110
LOC_Os01g48000	LOC_Os07g14150	LOC_Os01g04800		LOC_Os03g62670	LOC_Os05g45770	LOC_Os03g58300
LOC_Os01g49320	LOC_Os09g17810	LOC_Os01g39330		LOC_Os02g07830	LOC_Os07g34260	LOC_Os01g07630
LOC_Os01g50910	LOC_Os07g35340	LOC_Os09g11480		LOC_Os01g50060	LOC_Os06g35050	LOC_Os01g51980
LOC_Os01g51060	LOC_Os09g11460	LOC_Os07g47990		LOC_Os01g43700	LOC_Os06g05130	LOC_Os01g09540
LOC_Os01g51570	LOC_Os07g47990	LOC_Os08g05320		LOC_Os03g44740	LOC_Os04g57560	LOC_Os03g03790
LOC_Os01g52070	LOC_Os07g32590	LOC_Os07g34520		LOC_Os01g09540	LOC_Os08g07080	LOC_Os03g44740
LOC_Os01g52240	LOC_Os07g12640	LOC_Os08g39840		LOC_Os03g03790	LOC_Os06g04020	LOC_Os01g65650
LOC_Os01g52710	LOC_Os08g15306	LOC_Os07g43800		LOC_Os03g09930	LOC_Os06g03930	LOC_Os03g05910
LOC_Os01g53730	LOC_Os07g38430	LOC_Os09g17560		LOC_Os01g13229	LOC_Os04g33460	LOC_Os01g50060
LOC_Os01g54540	LOC_Os07g48510	LOC_Os07g48020		LOC_Os01g71720	LOC_Os08g31630	LOC_Os01g43700
LOC_Os01g55240	LOC_Os07g48550	LOC_Os01g42410		LOC_Os01g32364	LOC_Os08g01770	LOC_Os02g04760
LOC_Os01g55290	LOC_Os09g17560	LOC_Os02g01510		LOC_Os01g10240	LOC_Os07g04990	LOC_Os02g17780
LOC_Os01g57073	LOC_Os07g37320	LOC_Os01g02550		LOC_Os01g13540	LOC_Os07g43390	LOC_Os01g10450
LOC_Os01g59000	LOC_Os08g33350	LOC_Os01g73200		LOC_Os02g21009	LOC_Os05g06920	LOC_Os02g36210
LOC_Os01g59060	LOC_Os09g10760	LOC_Os01g02390		LOC_Os01g10450	LOC_Os07g37230	LOC_Os03g63330
LOC_Os01g59840	LOC_Os07g48020	LOC_Os01g55240		LOC_Os01g62460	LOC_Os04g33660	LOC_Os01g56330
LOC_Os01g60020	LOC_Os07g42510	LOC_Os01g52710		LOC_Os03g12530	LOC_Os05g05690	LOC_Os01g32364
LOC_Os01g60860	LOC_Os09g11480	LOC_Os01g73170		LOC_Os01g50070	LOC_Os06g20370	LOC_Os03g60190
LOC_Os01g61080	LOC_Os07g41230	LOC_Os01g57073		LOC_Os01g46720	LOC_Os08g36480	LOC_Os11g18366
LOC_Os01g61230	LOC_Os09g15050	LOC_Os01g03020		LOC_Os03g58300	LOC_Os05g47545	LOC_Os12g02980
LOC_Os01g61510	LOC_Os08g09200	LOC_Os01g48000		LOC_Os02g40664	LOC_Os07g23120	LOC_Os09g30130
LOC_Os01g61990	LOC_Os08g41990	LOC_Os01g59000		LOC_Os01g40870	LOC_Os07g49110	LOC_Os09g25620
LOC_Os01g63930	LOC_Os07g36800	LOC_Os01g43760		LOC_Os01g52010	LOC_Os06g14240	LOC_Os09g27820
LOC_Os01g64110	LOC_Os08g42910	LOC_Os01g22900		LOC_Os01g65110	LOC_Os06g35940	LOC_Os09g12290
LOC_Os01g64120	LOC_Os08g39840	LOC_Os01g18670		LOC_Os01g12210	LOC_Os08g04300	LOC_Os12g25490
LOC_Os01g70770	LOC_Os08g05320	LOC_Os01g47070		LOC_Os01g51980	LOC_Os07g09190	LOC_Os12g08220
LOC_Os01g71340	LOC_Os07g43810	LOC_Os02g02400		LOC_Os03g54000	LOC_Os04g53350	LOC_Os12g42280
LOC_Os01g71350	LOC_Os08g33440	LOC_Os01g12770		LOC_Os03g63330	LOC_Os03g12530	LOC_Os09g12660
LOC_Os01g72170	LOC_Os08g07100	LOC_Os01g63930		LOC_Os03g60190	LOC_Os03g56270	LOC_Os12g22284
LOC_Os01g73170	LOC_Os08g39600	LOC_Os01g64110		LOC_Os02g27490	LOC_Os02g40664	LOC_Os10g42800
LOC_Os01g73200	LOC_Os08g02700	LOC_Os01g71340		LOC_Os04g15920	LOC_Os03g08900	LOC_Os09g30380
LOC_Os02g01510	LOC_Os08g34150	LOC_Os01g12710		LOC_Os04g12499	LOC_Os01g52010	LOC_Os11g22350
LOC_Os02g02400	LOC_Os08g15270	LOC_Os01g15000		LOC_Os01g07630	LOC_Os01g43700	LOC_Os10g34790
LOC_Os02g04230	LOC_Os07g06800	LOC_Os01g02900		LOC_Os04g12530	LOC_Os04g21350	LOC_Os11g29720
LOC_Os02g08100	LOC_Os06g51060	LOC_Os01g04540		LOC_Os03g08110	LOC_Os03g09930	LOC_Os09g28620
LOC_Os02g09490	LOC_Os03g55720	LOC_Os01g04550		LOC_Os12g02810	LOC_Os01g56330	LOC_Os10g21396
LOC_Os02g09810	LOC_Os03g29540	LOC_Os01g04530		LOC_Os12g42400	LOC_Os01g71720	LOC_Os12g08760
LOC_Os02g10660	LOC_Os03g55070	LOC_Os01g59840		LOC_Os12g03899	LOC_Os01g10240	LOC_Os11g39990
LOC_Os02g11980	LOC_Os03g61260	LOC_Os01g72170		LOC_Os11g39990	LOC_Os02g07830	LOC_Os09g25625
LOC_Os02g12010	LOC_Os04g40630	LOC_Os01g70770		LOC_Os09g25625	LOC_Os02g56510	LOC_Os12g02810
LOC_Os02g12030	LOC_Os04g16830	LOC_Os01g49320		LOC_Os12g18770	LOC_Os03g54000	LOC_Os04g33660
LOC_Os02g12040	LOC_Os04g39300	LOC_Os01g61230		LOC_Os12g08760	LOC_Os03g11110	LOC_Os04g48930
LOC_Os02g16060	LOC_Os03g55164	LOC_Os01g41240		LOC_Os11g04150	LOC_Os01g07630	LOC_Os05g47545
LOC_Os02g16270	LOC_Os04g32110	LOC_Os01g12760		LOC_Os09g25620	LOC_Os03g02750	LOC_Os05g51470
LOC_Os02g17360	LOC_Os04g39350	LOC_Os01g09010		LOC_Os11g18366	LOC_Os01g50080	LOC_Os06g30179
LOC_Os02g18070	LOC_Os04g24220	LOC_Os01g43750		LOC_Os10g02220	LOC_Os01g65110	LOC_Os07g40974
LOC_Os02g18080	LOC_Os04g38680	LOC_Os01g71350		LOC_Os09g09930	LOC_Os01g51980	LOC_Os07g07050
LOC_Os02g32370	LOC_Os03g31750	LOC_Os01g42790		LOC_Os09g36680	LOC_Os01g02870	LOC_Os05g35200
LOC_Os02g32520	LOC_Os03g29190	LOC_Os01g51060		LOC_Os09g28620	LOC_Os05g12640	LOC_Os07g09190
LOC_Os02g34790	LOC_Os03g60100	LOC_Os01g22370		LOC_Os11g29720	LOC_Os04g48930	LOC_Os08g04300
LOC_Os02g35320	LOC_Os03g55990	LOC_Os01g22249		LOC_Os09g07120	LOC_Os07g30950	LOC_Os08g31630
LOC_Os02g36140	LOC_Os03g45400	LOC_Os01g60860		LOC_Os10g21396	LOC_Os06g12790	LOC_Os04g35100
LOC_Os02g36440	LOC_Os04g49370	LOC_Os01g51570		LOC_Os09g12660	LOC_Os06g48180	LOC_Os06g48180
LOC_Os02g36450	LOC_Os04g39320	LOC_Os01g02810		LOC_Os10g14870	LOC_Os04g34250	LOC_Os08g05280
LOC_Os02g36619	LOC_Os04g47190	LOC_Os02g40840		LOC_Os11g02520	LOC_Os08g08140	LOC_Os06g12790
LOC_Os02g36940	LOC_Os04g45090	LOC_Os03g12890		LOC_Os12g22284	LOC_Os06g34120	LOC_Os07g30950
LOC_Os02g38840	LOC_Os04g36800	LOC_Os02g09490		LOC_Os10g42800	LOC_Os07g48690	LOC_Os05g47540
LOC_Os02g39850	LOC_Os04g42250	LOC_Os03g07570		LOC_Os09g30130	LOC_Os05g25370	LOC_Os08g08140
LOC_Os02g40500	LOC_Os04g43200	LOC_Os02g41630		LOC_Os11g22350	LOC_Os08g43390	LOC_Os08g04500
LOC_Os02g40784	LOC_Os04g52100	LOC_Os03g03034		LOC_Os09g30380	LOC_Os07g15460	LOC_Os06g35050
LOC_Os02g40840	LOC_Os03g58790	LOC_Os02g54254		LOC_Os10g34790	LOC_Os06g08090	LOC_Os07g42994
LOC_Os02g41630	LOC_Os04g16820	LOC_Os02g38840		LOC_Os10g41260	LOC_Os06g10410	LOC_Os04g34250
LOC_Os02g43330	LOC_Os03g60080	LOC_Os02g17360		LOC_Os12g08220	LOC_Os05g12630	LOC_Os07g46920
LOC_Os02g44980	LOC_Os04g41229	LOC_Os02g11980		LOC_Os12g25490	LOC_Os09g04339	LOC_Os07g34260
LOC_Os02g46850	LOC_Os03g49350	LOC_Os03g17690		LOC_Os12g42280	LOC_Os04g35080	LOC_Os06g05130
LOC_Os02g46860	LOC_Os03g55970	LOC_Os02g49720		LOC_Os09g37710	LOC_Os05g39800	LOC_Os04g57560
LOC_Os02g47840	LOC_Os02g36140	LOC_Os02g40784		LOC_Os09g27820	LOC_Os09g34180	LOC_Os06g34120
LOC_Os02g49720	LOC_Os03g18130	LOC_Os02g04230		LOC_Os12g02980	LOC_Os09g36930	LOC_Os04g33460
LOC_Os02g52210	LOC_Os02g38840	LOC_Os02g36140		LOC_Os09g12290	LOC_Os10g21396	LOC_Os06g03930
LOC_Os02g53750	LOC_Os03g12890	LOC_Os02g12040		LOC_Os09g37910	LOC_Os12g41200	LOC_Os06g47650
LOC_Os02g54254	LOC_Os02g04230	LOC_Os02g54980		LOC_Os09g36930	LOC_Os09g07120	LOC_Os08g01770
LOC_Os02g54980	LOC_Os02g54254	LOC_Os03g05900		LOC_Os09g34180	LOC_Os10g14870	LOC_Os07g43390
LOC_Os02g56300	LOC_Os03g08470	LOC_Os03g18130		LOC_Os08g43400	LOC_Os09g30130	LOC_Os06g02000
LOC_Os02g57560	LOC_Os02g39850	LOC_Os02g12030		LOC_Os04g48930	LOC_Os09g17600	LOC_Os08g43390
LOC_Os02g57670	LOC_Os02g36619	LOC_Os03g09060		LOC_Os06g08090	LOC_Os10g02220	LOC_Os08g36480
LOC_Os03g02550	LOC_Os02g54980	LOC_Os03g06200		LOC_Os06g12790	LOC_Os12g42280	LOC_Os07g04990
LOC_Os03g03034	LOC_Os02g43330	LOC_Os03g20420		LOC_Os08g07080	LOC_Os11g04150	LOC_Os05g25370
LOC_Os03g03360	LOC_Os02g44880	LOC_Os03g12470		LOC_Os04g43800	LOC_Os12g22284	LOC_Os07g49110
LOC_Os03g04020	LOC_Os03g08490	LOC_Os02g39850		LOC_Os06g02000	LOC_Os09g25810	LOC_Os05g26820
LOC_Os03g04060	LOC_Os02g09810	LOC_Os03g10620		LOC_Os07g37230	LOC_Os12g02810	LOC_Os06g08090
LOC_Os03g05620	LOC_Os03g20420	LOC_Os02g12010		LOC_Os04g35080	LOC_Os12g42400	LOC_Os04g43800
LOC_Os03g05900	LOC_Os03g09060	LOC_Os02g53750		LOC_Os07g15460	LOC_Os11g18366	LOC_Os08g07080
LOC_Os03g06200	LOC_Os03g06200	LOC_Os02g57560		LOC_Os05g32210	LOC_Os09g12290	LOC_Os05g32210
LOC_Os03g07570	LOC_Os02g40784	LOC_Os02g32520		LOC_Os04g33660	LOC_Os09g37910	LOC_Os07g37230
LOC_Os03g08470	LOC_Os02g41630	LOC_Os03g08624		LOC_Os05g06920	LOC_Os12g08220	LOC_Os04g35080
LOC_Os03g08490	LOC_Os03g07570	LOC_Os02g52210		LOC_Os08g31630	LOC_Os12g25490	LOC_Os05g06920
LOC_Os03g08500	LOC_Os03g03360	LOC_Os02g35320		LOC_Os07g04990	LOC_Os09g12660	LOC_Os01g59410
LOC_Os03g08624	LOC_Os02g40840	LOC_Os02g56300		LOC_Os08g01770	LOC_Os09g30380	LOC_Os01g49470
LOC_Os03g08999	LOC_Os02g09490	LOC_Os02g32370		LOC_Os05g25370	LOC_Os12g08760	LOC_Os02g21009
LOC_Os03g09020	LOC_Os03g17690	LOC_Os03g04060		LOC_Os07g48690		LOC_Os03g62170
LOC_Os03g09060	LOC_Os02g17360	LOC_Os03g22790		LOC_Os06g49040		LOC_Os03g11110
LOC_Os03g10620	LOC_Os02g05470	LOC_Os02g08100		LOC_Os07g40974		LOC_Os03g08900
LOC_Os03g10950	LOC_Os03g19010	LOC_Os02g40500		LOC_Os07g49110		LOC_Os04g12530
LOC_Os03g12470	LOC_Os02g49720	LOC_Os03g10950		LOC_Os04g32850		LOC_Os02g27490
LOC_Os03g12500	LOC_Os03g12500	LOC_Os02g10660		LOC_Os08g36480		LOC_Os01g10240
LOC_Os03g12890	LOC_Os02g32520	LOC_Os03g09020		LOC_Os08g43390		LOC_Os03g46454
LOC_Os03g16950	LOC_Os03g04470	LOC_Os03g12500		LOC_Os06g10410		LOC_Os01g71720
LOC_Os03g16960	LOC_Os03g08500	LOC_Os03g08999		LOC_Os05g26820		LOC_Os03g09930
LOC_Os03g17690	LOC_Os02g40500	LOC_Os02g34790		LOC_Os07g08710		LOC_Os03g54000
LOC_Os03g17700	LOC_Os03g10950	LOC_Os03g17700		LOC_Os07g42994		LOC_Os01g12210
LOC_Os03g17790	LOC_Os02g57670	LOC_Os03g21230		LOC_Os06g35050		LOC_Os04g12499
LOC_Os03g18130	LOC_Os02g56300	LOC_Os04g42250		LOC_Os04g34250		LOC_Os01g65110
LOC_Os03g18600	LOC_Os03g19990	LOC_Os03g29190		LOC_Os07g46920		LOC_Os02g07830
LOC_Os03g19010	LOC_Os03g04060	LOC_Os04g37740		LOC_Os07g34260		LOC_Os03g12530
LOC_Os03g20090	LOC_Os02g32370	LOC_Os04g51030		LOC_Os06g04020		LOC_Os10g02220
LOC_Os03g20420	LOC_Os03g16350	LOC_Os04g16820		LOC_Os04g57560		LOC_Os12g03899
LOC_Os03g20840	LOC_Os03g08624	LOC_Os03g58790		LOC_Os05g35200		LOC_Os09g36930
LOC_Os03g21230	LOC_Os02g35320	LOC_Os04g52100		LOC_Os08g08140		LOC_Os11g04150
LOC_Os03g22790	LOC_Os06g35520	LOC_Os03g49350		LOC_Os06g03930
LOC_Os03g29190	LOC_Os06g46340	LOC_Os04g12960		LOC_Os04g33460
LOC_Os03g29410	LOC_Os06g22919	LOC_Os03g29540		LOC_Os06g47650
LOC_Os03g29540	LOC_Os04g59150	LOC_Os04g43200		LOC_Os07g43390
LOC_Os03g31750	LOC_Os04g59190	LOC_Os04g36800		LOC_Os06g30179
LOC_Os03g40194	LOC_Os04g59200	LOC_Os03g49440		LOC_Os06g14240
LOC_Os03g45390	LOC_Os12g44030	LOC_Os04g45090		LOC_Os06g20370
LOC_Os03g45400	LOC_Os12g38150	LOC_Os04g47190		LOC_Os05g51470
LOC_Os03g46070	LOC_Os11g47680	LOC_Os04g52640		LOC_Os05g47780
LOC_Os03g46200	LOC_Os12g38170	LOC_Os04g21790		LOC_Os06g48180
LOC_Os03g49350	LOC_Os12g43410	LOC_Os04g40990		LOC_Os08g05280
LOC_Os03g49440	LOC_Os12g44050	LOC_Os04g44354		LOC_Os07g30950
LOC_Os03g55010	LOC_Os06g09679	LOC_Os03g55720		LOC_Os05g11320
LOC_Os03g55070	LOC_Os05g48340	LOC_Os04g30250		LOC_Os08g04300
LOC_Os03g55164	LOC_Os06g49250	LOC_Os04g40470		LOC_Os11g26880
LOC_Os03g55720	LOC_Os05g09500	LOC_Os04g39880		LOC_Os10g41060
LOC_Os03g55970	LOC_Os05g28740	LOC_Os04g43410		LOC_Os06g35940
LOC_Os03g55990	LOC_Os12g04990	LOC_Os04g29790
LOC_Os03g56250	LOC_Os01g02550	LOC_Os04g16830
LOC_Os03g57310	LOC_Os01g43760	LOC_Os04g33240
LOC_Os03g57680	LOC_Os01g61510	LOC_Os04g29810
LOC_Os03g58790	LOC_Os01g64110	LOC_Os04g30110
LOC_Os03g60080	LOC_Os01g47070	LOC_Os03g29410
LOC_Os03g60100	LOC_Os01g06520	LOC_Os04g24220
LOC_Os03g60260	LOC_Os01g02390	LOC_Os03g55010
LOC_Os03g61150	LOC_Os01g49320	LOC_Os04g30160
LOC_Os03g61260	LOC_Os01g61990	LOC_Os04g30330
LOC_Os03g63310	LOC_Os01g11160	LOC_Os03g45390
LOC_Os03g63700	LOC_Os01g63930	LOC_Os03g56250
LOC_Os03g63900	LOC_Os01g42790	LOC_Os04g49194
LOC_Os04g12960	LOC_Os01g41240	LOC_Os03g63310
LOC_Os04g16820	LOC_Os01g02810	LOC_Os03g31750
LOC_Os04g16830	LOC_Os01g28450	LOC_Os04g29770
LOC_Os04g21790	LOC_Os01g42410	LOC_Os04g21820
LOC_Os04g21820	LOC_Os01g59000	LOC_Os04g30340
LOC_Os04g22120	LOC_Os01g48000	LOC_Os04g32740
LOC_Os04g24220	LOC_Os01g04540	LOC_Os04g30030
LOC_Os04g24290	LOC_Os01g71340	LOC_Os03g57680
LOC_Os04g29770	LOC_Os01g10990	LOC_Os04g38530
LOC_Os04g29790	LOC_Os01g04530	LOC_Os03g46200
LOC_Os04g29810	LOC_Os01g43750	LOC_Os03g63900
LOC_Os04g30030	LOC_Os01g12760	LOC_Os04g30240
LOC_Os04g30060	LOC_Os01g36070	LOC_Os04g30060
LOC_Os04g30110	LOC_Os05g17604	LOC_Os04g34360
LOC_Os04g30160	LOC_Os05g35290	LOC_Os03g55070
LOC_Os04g30240	LOC_Os06g19590	LOC_Os04g22120
LOC_Os04g30250	LOC_Os06g15370	LOC_Os04g24290
LOC_Os04g30330	LOC_Os05g44100	LOC_Os05g09500
LOC_Os04g30340	LOC_Os06g45140	LOC_Os05g08750
LOC_Os04g32110	LOC_Os06g48250	LOC_Os05g46460
LOC_Os04g32740	LOC_Os04g54080	LOC_Os05g34854
LOC_Os04g32920	LOC_Os05g47750	LOC_Os05g05680
LOC_Os04g33240	LOC_Os04g59480	LOC_Os06g36560
LOC_Os04g33610	LOC_Os06g48300	LOC_Os06g20200
LOC_Os04g34360	LOC_Os06g41020	LOC_Os05g43390
LOC_Os04g35540	LOC_Os06g20150	LOC_Os06g20960
LOC_Os04g36800	LOC_Os06g04150	LOC_Os04g59150
LOC_Os04g37740	LOC_Os06g38830	LOC_Os06g07600
LOC_Os04g38530	LOC_Os06g07200	LOC_Os05g07940
LOC_Os04g38680	LOC_Os05g31160	LOC_Os06g25010
LOC_Os04g39320	LOC_Os05g47660	LOC_Os04g59200
LOC_Os04g39880	LOC_Os04g56910	LOC_Os06g22919
LOC_Os04g40470	LOC_Os06g36560	LOC_Os06g02019
LOC_Os04g40630	LOC_Os06g39750	LOC_Os05g15770
LOC_Os04g40990	LOC_Os05g35650	LOC_Os06g19070
LOC_Os04g41229	LOC_Os04g58280	LOC_Os06g39750
LOC_Os04g42250	LOC_Os06g39712	LOC_Os06g39712
LOC_Os04g43200	LOC_Os05g25770	LOC_Os05g17604
LOC_Os04g43410	LOC_Os06g24990	LOC_Os06g24990
LOC_Os04g43440	LOC_Os05g08750	LOC_Os06g13560
LOC_Os04g44354	LOC_Os05g34854	LOC_Os05g50190
LOC_Os04g45090	LOC_Os05g43390	LOC_Os04g53850
LOC_Os04g47190	LOC_Os06g07600	LOC_Os05g50380
LOC_Os04g47780	LOC_Os05g27660	LOC_Os06g35520
LOC_Os04g48270	LOC_Os05g27780	LOC_Os04g59190
LOC_Os04g49160	LOC_Os06g25010	LOC_Os06g20150
LOC_Os04g49194	LOC_Os05g39720	LOC_Os06g38830
LOC_Os04g49370	LOC_Os06g02019	LOC_Os06g04150
LOC_Os04g49748	LOC_Os06g15330	LOC_Os06g03830
LOC_Os04g51030	LOC_Os05g15770	LOC_Os05g04584
LOC_Os04g52100	LOC_Os04g30250	LOC_Os05g25390
LOC_Os04g52640	LOC_Os04g22120	LOC_Os05g47660
LOC_Os04g52670	LOC_Os04g24290	LOC_Os06g46340
LOC_Os04g52810	LOC_Os04g32920	LOC_Os04g56910
LOC_Os04g53120	LOC_Os04g34360	LOC_Os06g44170
LOC_Os04g53850	LOC_Os03g60260	LOC_Os05g50090
LOC_Os04g54080	LOC_Os04g30240	LOC_Os05g35290
LOC_Os04g54310	LOC_Os04g30060	LOC_Os06g19590
LOC_Os04g56910	LOC_Os04g30340	LOC_Os05g44100
LOC_Os04g59150	LOC_Os04g39880	LOC_Os04g54080
LOC_Os04g59190	LOC_Os04g21820	LOC_Os06g48250
LOC_Os04g59200	LOC_Os04g35540	LOC_Os05g19910
LOC_Os04g59480	LOC_Os04g35130	LOC_Os05g47750
LOC_Os05g04584	LOC_Os04g52640	LOC_Os06g48300
LOC_Os05g05680	LOC_Os04g43440	LOC_Os06g41020
LOC_Os05g07940	LOC_Os04g29770	LOC_Os08g02640
LOC_Os05g08750	LOC_Os03g45390	LOC_Os06g51060
LOC_Os05g09020	LOC_Os04g30330	LOC_Os07g35560
LOC_Os05g09500	LOC_Os03g56250	LOC_Os09g18159
LOC_Os05g15770	LOC_Os04g49160	LOC_Os07g46852
LOC_Os05g17604	LOC_Os04g30160	LOC_Os07g33580
LOC_Os05g19910	LOC_Os03g57310	LOC_Os08g39600
LOC_Os05g25390	LOC_Os04g30110	LOC_Os09g16950
LOC_Os05g25770	LOC_Os04g29810	LOC_Os07g14150
LOC_Os05g27780	LOC_Os04g29790	LOC_Os07g04040
LOC_Os05g28740	LOC_Os04g43410	LOC_Os07g41230
LOC_Os05g31160	LOC_Os04g40470	LOC_Os07g48510
LOC_Os05g34854	LOC_Os04g47780	LOC_Os07g35480
LOC_Os05g35290	LOC_Os03g46070	LOC_Os08g38710
LOC_Os05g35650	LOC_Os03g55980	LOC_Os07g34850
LOC_Os05g39720	LOC_Os04g21790	LOC_Os09g18020
LOC_Os05g43390	LOC_Os03g58980	LOC_Os07g12640
LOC_Os05g44100	LOC_Os04g49748	LOC_Os08g29570
LOC_Os05g45020	LOC_Os04g51030	LOC_Os08g40690
LOC_Os05g46020	LOC_Os04g37740	LOC_Os08g39694
LOC_Os05g46460	LOC_Os02g44980	LOC_Os08g15270
LOC_Os05g47660	LOC_Os02g46850	LOC_Os07g06800
LOC_Os05g47750	LOC_Os03g16960	LOC_Os08g40680
LOC_Os05g50090	LOC_Os02g46860	LOC_Os08g30770
LOC_Os05g50190	LOC_Os02g36440	LOC_Os08g07100
LOC_Os05g50380	LOC_Os03g16950	LOC_Os08g33440
LOC_Os06g02019	LOC_Os02g52210	LOC_Os08g42910
LOC_Os06g03830	LOC_Os03g05620	LOC_Os08g41990
LOC_Os06g04150	LOC_Os03g17790	LOC_Os09g15050
LOC_Os06g07030	LOC_Os03g21230	LOC_Os08g39660
LOC_Os06g07200	LOC_Os03g04020	LOC_Os07g33610
LOC_Os06g07600	LOC_Os02g34790	LOC_Os08g39730
LOC_Os06g09679	LOC_Os02g10660	LOC_Os07g06850
LOC_Os06g13560	LOC_Os02g36450	LOC_Os08g02230
LOC_Os06g15330	LOC_Os02g12030	LOC_Os07g35390
LOC_Os06g15370	LOC_Os02g12040	LOC_Os07g32590
LOC_Os06g19070	LOC_Os03g09900	LOC_Os11g47600
LOC_Os06g19590	LOC_Os02g11980	LOC_Os12g04990
LOC_Os06g20150	LOC_Os02g36940	LOC_Os11g47560
LOC_Os06g20200	LOC_Os02g12010	LOC_Os12g24020
LOC_Os06g20960	LOC_Os07g35330	LOC_Os12g10590
LOC_Os06g22919	LOC_Os08g40690	LOC_Os12g28550
LOC_Os06g24990	LOC_Os07g35750	LOC_Os12g26470
LOC_Os06g25010	LOC_Os08g29570	LOC_Os12g38770
LOC_Os06g35520	LOC_Os08g10290	LOC_Os12g04440
LOC_Os06g36560	LOC_Os07g35810	LOC_Os12g24650
LOC_Os06g38830	LOC_Os07g34850	LOC_Os12g19030
LOC_Os06g39712	LOC_Os07g35310	LOC_Os12g24320
LOC_Os06g39750	LOC_Os09g18020	LOC_Os12g44030
LOC_Os06g41020	LOC_Os09g16950	LOC_Os12g30180
LOC_Os06g44170	LOC_Os08g10310	LOC_Os12g44050
LOC_Os06g45140	LOC_Os07g04040	LOC_Os12g35340
LOC_Os06g46340	LOC_Os08g10320	LOC_Os12g17160
LOC_Os06g46950	LOC_Os09g18159	LOC_Os10g12050
LOC_Os06g48250	LOC_Os07g33580	LOC_Os10g37340
LOC_Os06g48300	LOC_Os08g13440	LOC_Os09g27010
LOC_Os06g49250	LOC_Os08g29020	LOC_Os10g40934
LOC_Os06g49390	LOC_Os07g35390	LOC_Os09g32290
LOC_Os06g50040	LOC_Os07g35370	LOC_Os10g39700
LOC_Os06g51060	LOC_Os08g24310	LOC_Os10g17489
LOC_Os07g04040	LOC_Os07g33610	LOC_Os10g21418
LOC_Os07g06800	LOC_Os07g35540	LOC_Os09g29540
LOC_Os07g06850	LOC_Os08g16050	LOC_Os10g40640
LOC_Os07g08150	LOC_Os08g02230	LOC_Os10g12080
LOC_Os07g09010	LOC_Os07g03710	LOC_Os10g41550
LOC_Os07g09420	LOC_Os08g37670	LOC_Os11g15040
LOC_Os07g12640	LOC_Os08g40680	LOC_Os10g02070
LOC_Os07g14150	LOC_Os08g30770	LOC_Os09g29560
LOC_Os07g32590	LOC_Os11g47600	LOC_Os10g25550
LOC_Os07g33580	LOC_Os12g32280	LOC_Os11g07440
LOC_Os07g33610	LOC_Os12g24020	LOC_Os10g28350
LOC_Os07g34520	LOC_Os11g47560	LOC_Os10g34350
LOC_Os07g34850	LOC_Os12g10590	LOC_Os09g31200
LOC_Os07g35310	LOC_Os12g38770	LOC_Os09g18260
LOC_Os07g35330	LOC_Os12g04440	LOC_Os10g38489
LOC_Os07g35340	LOC_Os12g26470	LOC_Os11g07960
LOC_Os07g35370	LOC_Os12g19030	LOC_Os10g21300
LOC_Os07g35390	LOC_Os12g24320	LOC_Os09g18360
LOC_Os07g35480	LOC_Os12g24650	LOC_Os09g27950
LOC_Os07g35540	LOC_Os12g30180	LOC_Os09g34214
LOC_Os07g35560	LOC_Os12g04360	LOC_Os10g39680
LOC_Os07g35750	LOC_Os12g35340	LOC_Os10g38360
LOC_Os07g35810	LOC_Os10g03850	LOC_Os10g21194
LOC_Os07g37320	LOC_Os11g07200	LOC_Os01g64120
LOC_Os07g41230	LOC_Os11g29870	LOC_Os01g56450
LOC_Os07g42510	LOC_Os11g31900	LOC_Os01g52240
LOC_Os07g43810	LOC_Os10g21300	LOC_Os01g04280
LOC_Os07g46852	LOC_Os09g18260	LOC_Os01g14410
LOC_Os07g47670	LOC_Os09g31200	LOC_Os01g15540
LOC_Os07g47990	LOC_Os09g31478	LOC_Os01g63690
LOC_Os07g48020	LOC_Os10g23050	LOC_Os01g52070
LOC_Os07g48450	LOC_Os11g03820	LOC_Os04g48270
LOC_Os07g48510	LOC_Os10g21194	LOC_Os04g40630
LOC_Os07g48550	LOC_Os10g33040	LOC_Os03g55990
LOC_Os08g02230	LOC_Os10g39680	LOC_Os04g41229
LOC_Os08g02640	LOC_Os10g38360	LOC_Os03g60080
LOC_Os08g02700	LOC_Os11g03370	LOC_Os04g49160
LOC_Os08g05320	LOC_Os11g36200	LOC_Os03g57310
LOC_Os08g07100	LOC_Os11g07440	LOC_Os03g58980
LOC_Os08g09200	LOC_Os09g36200	LOC_Os04g39320
LOC_Os08g10290	LOC_Os09g27950	LOC_Os03g45400
LOC_Os08g10310	LOC_Os09g28354	LOC_Os04g43440
LOC_Os08g10320	LOC_Os09g28180	LOC_Os03g61150
LOC_Os08g15270	LOC_Os10g41550	LOC_Os03g40194
LOC_Os08g15306	LOC_Os10g40640	LOC_Os04g39350
LOC_Os08g24310	LOC_Os09g29540	LOC_Os04g32110
LOC_Os08g29020	LOC_Os10g37340	LOC_Os04g39300
LOC_Os08g29570	LOC_Os09g29560	LOC_Os03g55164
LOC_Os08g30770	LOC_Os10g12050	LOC_Os05g09020
LOC_Os08g33350	LOC_Os11g38870	LOC_Os05g25770
LOC_Os08g33440	LOC_Os10g02070	LOC_Os05g46020
LOC_Os08g34150	LOC_Os09g19954	LOC_Os06g09679
LOC_Os08g38710	LOC_Os11g37950	LOC_Os06g45140
LOC_Os08g39600	LOC_Os10g21314	LOC_Os06g46950
LOC_Os08g39660	LOC_Os09g18360	LOC_Os05g30010
LOC_Os08g39694	LOC_Os10g21590	LOC_Os05g45020
LOC_Os08g39730	LOC_Os10g38489	LOC_Os05g26040
LOC_Os08g39840	LOC_Os09g28210	LOC_Os06g49390
LOC_Os08g40680	LOC_Os11g07960	LOC_Os05g39260
LOC_Os08g40690	LOC_Os10g41330	LOC_Os05g31160
LOC_Os08g41990	LOC_Os10g39100	LOC_Os05g48340
LOC_Os08g42910	LOC_Os10g35460	LOC_Os05g37520
LOC_Os08g43550	LOC_Os10g34910	LOC_Os04g52810
LOC_Os09g11460	LOC_Os09g37540	LOC_Os06g07030
LOC_Os09g11480	LOC_Os10g33130	LOC_Os04g53120
LOC_Os09g15050	LOC_Os10g33210	LOC_Os05g39720
LOC_Os09g16950	LOC_Os09g19952	LOC_Os06g07200
LOC_Os09g17560	LOC_Os11g29710	LOC_Os05g27780
LOC_Os09g17810	LOC_Os11g07120	LOC_Os06g15330
LOC_Os09g18020	LOC_Os10g33080	LOC_Os08g13440
LOC_Os09g18159	LOC_Os11g04560	LOC_Os07g46030
LOC_Os09g18260	LOC_Os10g21346	LOC_Os07g08150
LOC_Os09g18360	LOC_Os11g12340	LOC_Os08g37670
LOC_Os09g19830	LOC_Os10g12080	LOC_Os07g43810
LOC_Os09g19952	LOC_Os11g11960	LOC_Os08g02700
LOC_Os09g19954	LOC_Os09g24580	LOC_Os07g42510
LOC_Os09g27010	LOC_Os10g21418	LOC_Os09g11460
LOC_Os09g27950	LOC_Os10g39700	LOC_Os07g48550
LOC_Os09g28180	LOC_Os10g28350	LOC_Os07g46060
LOC_Os09g28210	LOC_Os11g11940	LOC_Os08g43550
LOC_Os09g28354	LOC_Os11g31190	LOC_Os07g48450
LOC_Os09g29540	LOC_Os10g05250	LOC_Os08g34150
LOC_Os09g29560	LOC_Os11g33970	LOC_Os10g30450
LOC_Os09g31200		LOC_Os09g35580
LOC_Os09g31478		LOC_Os10g41330
LOC_Os09g32290		LOC_Os11g10120
LOC_Os09g34214		LOC_Os09g28354
LOC_Os09g37330		LOC_Os10g31850
LOC_Os10g02070		LOC_Os09g24580
LOC_Os10g04490		LOC_Os11g32500
LOC_Os10g05250		LOC_Os11g03300
LOC_Os10g12050		LOC_Os11g38870
LOC_Os10g12080		LOC_Os09g28210
LOC_Os10g17489		LOC_Os11g29870
LOC_Os10g21194		LOC_Os11g37950
LOC_Os10g21300		LOC_Os11g29710
LOC_Os10g21314		LOC_Os10g25290
LOC_Os10g21346		LOC_Os11g04560
LOC_Os10g21418		LOC_Os10g23050
LOC_Os10g21590		LOC_Os11g03370
LOC_Os10g23050		LOC_Os11g45190
LOC_Os10g25290		LOC_Os12g04360
LOC_Os10g25550		LOC_Os12g01490
LOC_Os10g28350		LOC_Os11g44990
LOC_Os10g30450		LOC_Os11g45130
LOC_Os10g33040		LOC_Os11g45050
LOC_Os10g33080		LOC_Os11g45740
LOC_Os10g33130		LOC_Os12g43410
LOC_Os10g33210		LOC_Os12g36940
LOC_Os10g34350		LOC_Os12g03040
LOC_Os10g34910		LOC_Os12g29330
LOC_Os10g35460		LOC_Os11g44960
LOC_Os10g37340		LOC_Os12g41680
LOC_Os10g38360		LOC_Os12g36110
LOC_Os10g38489
LOC_Os10g39680
LOC_Os10g39700
LOC_Os10g40640
LOC_Os10g40934
LOC_Os10g41330
LOC_Os10g41550
LOC_Os11g03300
LOC_Os11g03370
LOC_Os11g03820
LOC_Os11g07120
LOC_Os11g07200
LOC_Os11g07440
LOC_Os11g07960
LOC_Os11g10120
LOC_Os11g11940
LOC_Os11g11960
LOC_Os11g12340
LOC_Os11g15040
LOC_Os11g17380
LOC_Os11g29870
LOC_Os11g31190
LOC_Os11g31900
LOC_Os11g34920
LOC_Os11g36200
LOC_Os11g37950
LOC_Os11g38870
LOC_Os11g44960
LOC_Os11g44990
LOC_Os11g45050
LOC_Os11g45130
LOC_Os11g45190
LOC_Os11g45740
LOC_Os11g47560
LOC_Os11g47600
LOC_Os11g47680
LOC_Os12g01490
LOC_Os12g03040
LOC_Os12g04440
LOC_Os12g04990
LOC_Os12g10590
LOC_Os12g17160
LOC_Os12g19030
LOC_Os12g24020
LOC_Os12g24320
LOC_Os12g24650
LOC_Os12g26470
LOC_Os12g28550
LOC_Os12g29330
LOC_Os12g30180
LOC_Os12g35340
LOC_Os12g38150
LOC_Os12g38170
LOC_Os12g38770
LOC_Os12g41680
LOC_Os12g43410
LOC_Os12g44030
LOC_Os12g44050

## Sheet: bp_cc_mf
Up-regulated_GO					Down-regulated_GO
bp	GO:0007582	physiological process	425		bp	GO:0007582	physiological process	161
bp	GO:0008152	metabolism	382		bp	GO:0008152	metabolism	133
bp	GO:0009987	cellular process	333		bp	GO:0009987	cellular process	131
bp	GO:0050875	cellular physiological process	237		bp	GO:0044238	primary metabolism	63
bp	GO:0044238	primary metabolism	212		bp	GO:0050875	cellular physiological process	57
bp	GO:0050896	response to stimulus	185		bp	GO:0009058	biosynthesis	41
bp	GO:0044237	cellular metabolism	128		bp	GO:0006810	transport	24
bp	GO:0006950	response to stress	116		bp	GO:0051179	localization	24
bp	GO:0019538	protein metabolism	72		bp	GO:0051234	establishment of localization	24
bp	GO:0044260	cellular macromolecule metabolism	68		bp	GO:0050896	response to stimulus	23
bp	GO:0044267	cellular protein metabolism	68		bp	GO:0006629	lipid metabolism	19
bp	GO:0009058	biosynthesis	63		bp	GO:0006950	response to stress	17
bp	GO:0043283	biopolymer metabolism	62		bp	GO:0007275	development	14
bp	GO:0006464	protein modification	61		bp	GO:0007154	cell communication	11
bp	GO:0043170	macromolecule metabolism	60		bp	GO:0048856	anatomical structure development	6
bp	GO:0009607	response to biotic stimulus	32		bp	GO:0009605	response to external stimulus	5
bp	GO:0009628	response to abiotic stimulus	29		bp	GO:0009991	response to extracellular stimulus	4
bp	GO:0007154	cell communication	25		cc	GO:0044464	cell part	118
bp	GO:0007275	development	14		cc	GO:0005623	cell	107
bp	GO:0007165	signal transduction	13		cc	GO:0005622	intracellular	68
bp	GO:0019748	secondary metabolism	12		cc	GO:0044424	intracellular part	68
bp	GO:0009719	response to endogenous stimulus	11		cc	GO:0005737	cytoplasm	62
bp	GO:0009056	catabolism	8		cc	GO:0044444	cytoplasmic part	57
bp	GO:0009653	morphogenesis	8		cc	GO:0016020	membrane	42
bp	GO:0048856	anatomical structure development	8		cc	GO:0043226	organelle	31
bp	GO:0000003	reproduction	6		cc	GO:0043229	intracellular organelle	31
bp	GO:0000902	cell morphogenesis	6		cc	GO:0043227	membrane-bound organelle	30
bp	GO:0005975	carbohydrate metabolism	6		cc	GO:0043231	intracellular membrane-bound organelle	30
bp	GO:0008361	regulation of cell size	6		cc	GO:0009536	plastid	29
bp	GO:0009605	response to external stimulus	6		cc	GO:0005773	vacuole	8
bp	GO:0009791	post-embryonic	6		cc	GO:0005654	nucleoplasm	1
bp	GO:0016049	cell growth	6		mf	GO:0003824	catalytic activity	111
bp	GO:0009991	response to extracellular stimulus	5		mf	GO:0016740	transferase activity	34
bp	GO:0008219	cell death	4		mf	GO:0005488	binding	28
bp	GO:0009790	embryonic development	4		mf	GO:0005215	transporter activity	22
bp	GO:0016265	death	4		mf	GO:0003676	nucleic acid binding	16
bp	GO:0006091	generation of precursor metabolites and energy	2		mf	GO:0003677	DNA binding	15
cc	GO:0005623	cell	387		mf	GO:0003700	transcription factor activity	7
cc	GO:0044464	cell part	310		mf	GO:0030528	transcription regulator activity	7
cc	GO:0044424	intracellular part	181		mf	GO:0005102	receptor binding	2
cc	GO:0005622	intracellular	149		mf	GO:0003774	motoractivity	1
cc	GO:0005737	cytoplasm	128
cc	GO:0044444	cytoplasmic part	119
cc	GO:0016020	membrane	114
cc	GO:0043226	organelle	97
cc	GO:0043229	intracellular organelle	97
cc	GO:0043227	membrane-bound organelle	96
cc	GO:0043231	intracellular membrane-bound organelle	96
cc	GO:0005886	plasma membrane	39
cc	GO:0009536	plastid	32
cc	GO:0005773	vacuole	15
cc	GO:0005618	cell wall	12
cc	GO:0005739	mitochondrion	12
cc	GO:0030312	external encapsulating structure	12
cc	GO:0005829	cytosol	11
cc	GO:0005840	ribosome	5
cc	GO:0030529	ribonucleoprotein complex	5
cc	GO:0043234	protein complex	5
cc	GO:0005576	extracellular region	4
cc	GO:0005777	peroxisome	1
cc	GO:0042579	microbody	1
mf	GO:0003824	catalytic activity	307
mf	GO:0005488	binding	242
mf	GO:0016740	transferase activity	116
mf	GO:0016787	hydrolase activity	57
mf	GO:0016301	kinase activity	55
mf	GO:0016772	transferase activity, transferring phosphorus-containing groups	55
mf	GO:0000166	nucleotide binding	33
mf	GO:0005515	protein binding	15
mf	GO:0019825	oxygen binding	11
mf	GO:0003700	transcription factor activity	10
mf	GO:0030528	transcription regulator activity	10
mf	GO:0030246	carbohydrate binding	2

## Sheet: Figure_6A,B,C
	GO	GO_term	Up-regulated	Down-regulated				GO_term	Number of genes
bp	GO:0048856	anatomical structure development	8	6		bp	GO:0048856	anatomical structure development	14
mf	GO:0005488	binding	242	28		bp	GO:0043283	biopolymer metabolism	62
bp	GO:0043283	biopolymer metabolism	62	0		bp	GO:0009058	biosynthesis	104
bp	GO:0009058	biosynthesis	63	41		bp	GO:0005975	carbohydrate metabolism	6
mf	GO:0030246	carbohydrate binding	2	0		bp	GO:0009056	catabolism	8
bp	GO:0005975	carbohydrate metabolism	6	0		bp	GO:0007154	cell communication	36
bp	GO:0009056	catabolism	8	0		bp	GO:0008219	cell death	4
mf	GO:0003824	catalytic activity	307	111		bp	GO:0016049	cell growth	6
cc	GO:0005623	cell	387	107		bp	GO:0000902	cell morphogenesis	6
bp	GO:0007154	cell communication	25	11		bp	GO:0044260	cellular macromolecule metabolism	68
bp	GO:0008219	cell death	4	0		bp	GO:0044237	cellular metabolism	128
bp	GO:0016049	cell growth	6	0		bp	GO:0050875	cellular physiological process	294
bp	GO:0000902	cell morphogenesis	6	0		bp	GO:0009987	cellular process	464
cc	GO:0044464	cell part	310	118		bp	GO:0044267	cellular protein metabolism	68
cc	GO:0005618	cell wall	12	0		bp	GO:0016265	death	4
bp	GO:0044260	cellular macromolecule metabolism	68	0		bp	GO:0007275	development	28
bp	GO:0044237	cellular metabolism	128	0		bp	GO:0009790	embryonic development	4
bp	GO:0050875	cellular physiological process	237	57		bp	GO:0051234	establishment of localization	24
bp	GO:0009987	cellular process	333	131		bp	GO:0006091	generation of precursor metabolites and energy	2
bp	GO:0044267	cellular protein metabolism	68	0		bp	GO:0006629	lipid metabolism	19
cc	GO:0005737	cytoplasm	128	62		bp	GO:0051179	localization	24
cc	GO:0044444	cytoplasmic part	119	57		bp	GO:0043170	macromolecule metabolism	60
cc	GO:0005829	cytosol	11	0		bp	GO:0008152	metabolism	515
bp	GO:0016265	death	4	0		bp	GO:0009653	morphogenesis	8
bp	GO:0007275	development	14	14		bp	GO:0007582	physiological process	586
mf	GO:0003677	DNA binding	0	15		bp	GO:0009791	post-embryonic	6
bp	GO:0009790	embryonic development	4	0		bp	GO:0044238	primary metabolism	275
bp	GO:0051234	establishment of localization	0	24		bp	GO:0019538	protein metabolism	72
cc	GO:0030312	external encapsulating structure	12	0		bp	GO:0006464	protein modification	61
cc	GO:0005576	extracellular region	4	0		bp	GO:0008361	regulation of cell size	6
bp	GO:0006091	generation of precursor metabolites and energy	2	0		bp	GO:0000003	reproduction	6
mf	GO:0016787	hydrolase activity	57	0		bp	GO:0009628	response to abiotic stimulus	29
cc	GO:0005622	intracellular	149	68		bp	GO:0009607	response to biotic stimulus	32
cc	GO:0043231	intracellular membrane-bound organelle	96	30		bp	GO:0009719	response to endogenous stimulus	11
cc	GO:0043229	intracellular organelle	97	31		bp	GO:0009605	response to external stimulus	11
cc	GO:0044424	intracellular part	181	68		bp	GO:0009991	response to extracellular stimulus	9
mf	GO:0016301	kinase activity	55	0		bp	GO:0050896	response to stimulus	208
bp	GO:0006629	lipid metabolism	0	19		bp	GO:0006950	response to stress	133
bp	GO:0051179	localization	0	24		bp	GO:0019748	secondary metabolism	12
bp	GO:0043170	macromolecule metabolism	60	0		bp	GO:0007165	signal transduction	13
cc	GO:0016020	membrane	114	42		bp	GO:0006810	transport	24
cc	GO:0043227	membrane-bound organelle	96	30		cc	GO:0005623	cell	494
bp	GO:0008152	metabolism	382	133		cc	GO:0044464	cell part	428
cc	GO:0042579	microbody	1	0		cc	GO:0005618	cell wall	12
cc	GO:0005739	mitochondrion	12	0		cc	GO:0005737	cytoplasm	190
bp	GO:0009653	morphogenesis	8	0		cc	GO:0044444	cytoplasmic part	176
mf	GO:0003774	motoractivity	0	1		cc	GO:0005829	cytosol	11
mf	GO:0003676	nucleic acid binding	0	16		cc	GO:0030312	external encapsulating structure	12
cc	GO:0005654	nucleoplasm	0	1		cc	GO:0005576	extracellular region	4
mf	GO:0000166	nucleotide binding	33	0		cc	GO:0005622	intracellular	217
cc	GO:0043226	organelle	97	31		cc	GO:0043231	intracellular membrane-bound organelle	126
mf	GO:0019825	oxygen binding	11	0		cc	GO:0043229	intracellular organelle	128
cc	GO:0005777	peroxisome	1	0		cc	GO:0044424	intracellular part	249
bp	GO:0007582	physiological process	425	161		cc	GO:0016020	membrane	156
cc	GO:0005886	plasma membrane	39	0		cc	GO:0043227	membrane-bound organelle	126
cc	GO:0009536	plastid	32	29		cc	GO:0042579	microbody	1
bp	GO:0009791	post-embryonic	6	0		cc	GO:0005739	mitochondrion	12
bp	GO:0044238	primary metabolism	212	63		cc	GO:0005654	nucleoplasm	1
mf	GO:0005515	protein binding	15	0		cc	GO:0043226	organelle	128
cc	GO:0043234	protein complex	5	0		cc	GO:0005777	peroxisome	1
bp	GO:0019538	protein metabolism	72	0		cc	GO:0005886	plasma membrane	39
bp	GO:0006464	protein modification	61	0		cc	GO:0009536	plastid	61
mf	GO:0005102	receptor binding	0	2		cc	GO:0043234	protein complex	5
bp	GO:0008361	regulation of cell size	6	0		cc	GO:0030529	ribonucleoprotein complex	5
bp	GO:0000003	reproduction	6	0		cc	GO:0005840	ribosome	5
bp	GO:0009628	response to abiotic stimulus	29	0		cc	GO:0005773	vacuole	23
bp	GO:0009607	response to biotic stimulus	32	0		mf	GO:0005488	binding	270
bp	GO:0009719	response to endogenous stimulus	11	0		mf	GO:0030246	carbohydrate binding	2
bp	GO:0009605	response to external stimulus	6	5		mf	GO:0003824	catalytic activity	418
bp	GO:0009991	response to extracellular stimulus	5	4		mf	GO:0003677	DNA binding	15
bp	GO:0050896	response to stimulus	185	23		mf	GO:0016787	hydrolase activity	57
bp	GO:0006950	response to stress	116	17		mf	GO:0016301	kinase activity	55
cc	GO:0030529	ribonucleoprotein complex	5	0		mf	GO:0003774	motoractivity	1
cc	GO:0005840	ribosome	5	0		mf	GO:0003676	nucleic acid binding	16
bp	GO:0019748	secondary metabolism	12	0		mf	GO:0000166	nucleotide binding	33
bp	GO:0007165	signal transduction	13	0		mf	GO:0019825	oxygen binding	11
mf	GO:0003700	transcription factor activity	10	7		mf	GO:0005515	protein binding	15
mf	GO:0030528	transcription regulator activity	10	7		mf	GO:0005102	receptor binding	2
mf	GO:0016740	transferase activity	116	34		mf	GO:0003700	transcription factor activity	17
mf	GO:0016772	transferase activity, transferring phosphorus-containing groups	55	0		mf	GO:0030528	transcription regulator activity	17
bp	GO:0006810	transport	0	24		mf	GO:0016740	transferase activity	150
mf	GO:0005215	transporter activity	0	22		mf	GO:0016772	transferase activity, transferring phosphorus-containing groups	55
cc	GO:0005773	vacuole	15	8		mf	GO:0005215	transporter activity	22

## Sheet: TOP_10
Table s6. Functional annotation of DEGs between N22 and M-507.
GO_term	physiological process	metabolism	cell	cellular process	cell part	catalytic activity	cellular physiological process	primary metabolism	binding	intracellular part
Up-regulated	425	382	387	333	310	307	237	212	242	181
Down-regulated	161	133	107	131	118	111	57	63	28	68
