# Supplementary material for: RNA-Seq, co-expression network and eQTL analysis identify key genes for chlorophyll and carbon metabolism in rice
Source: Research Square preprint supplement (doi:10.21203/rs.3.rs-2517802/v1), 2023-02-08
Supplement: Supplementary file 13 [file ff5189fcb2ae129419738a79.xlsx]

## Sheet: kh2_
OPEN 6.3.4					6-20= N22
Fri Oct 23 2020 11:25:55					36-50=M-507
Unit=	PSC-2236
LCF=	LCF-0825
LCFCals=	-1.41	-1.28	-2921.72
LightSource=	6400-40 (Light source only)	1	0.16
A/D AvgTime=	4
Config=	/User/Configs/UserPrefs/LCF_Light Source.xml
Remark=
Obs	HHMMSS	FTime	EBal?	Photo	Cond	Ci	Trmmol	VpdL	CTleaf	Area	BLC_1	StmRat	BLCond	Tair	Tleaf	TBlk	CO2R	CO2S	H2OR	H2OS	RH_R	RH_S	Flow	PARi	PARo	Press	CsMch	HsMch	CsMchSD	HsMchSD	CrMchSD	HrMchSD	StableF	BLCslope	BLCoffst	f_parin	f_parout	alphaK	Status	fda	Trans	Tair_K	Twall_K	R(W/m2)	Tl-Ta	SVTleaf	h2o_i	h20diff	CTair
in	in	in	in	out	out	out	out	out	out	in	out	in	out	in	in	in	in	in	in	in	in	in	in	in	in	in	in	in	in	in	in	in	in	in	in	in	in	in	in	out	out	out	out	out	out	out	out	out	out
6	11:34:17	514.5	0	2.65786	0.00499909	-450.399	0.129134	2.4277	31.8456	1	6	1	12	31.4598	31.8456	31.4301	400.062	399.521	23.6332	23.6584	49.7375	49.7905	500.582	997.904	121.242	97.4623	-16.2283	0.0228937	0.0460071	0.0495922	0.107089	0.0495691	1	-1.35514	7.35514	1	0	0.16	111115	5.00582	0.000129134	304.996	304.61	159.665	0.444634	4.7335	48.5675	24.9091	31.6527
7	11:34:19	516	0	2.32714	0.00553032	-276.562	0.142955	2.42945	31.853	1	6	1	12	31.4626	31.853	31.4322	399.999	399.523	23.6332	23.6611	49.7296	49.7883	500.591	997.91	121.383	97.4622	-16.2283	0.0228937	0.0460071	0.0495922	0.107089	0.0495691	1	-1.35514	7.35514	1	0	0.16	111115	5.00591	0.000142955	305.003	304.613	159.666	0.442647	4.73551	48.5882	24.9271	31.6578
8	11:34:20	517	0	2.61401	0.00608735	-290.117	0.157386	2.43003	31.8561	1	6	1	12	31.4635	31.8561	31.4326	400.048	399.513	23.6331	23.6638	49.7265	49.7911	500.578	1001.82	120.529	97.4618	-16.2283	0.0228937	0.0460071	0.0495922	0.107089	0.0495691	1	-1.35514	7.35514	1	0	0.16	111115	5.00578	0.000157386	305.006	304.613	160.291	0.442534	4.73634	48.5969	24.9331	31.6598
9	11:34:21	518	0	2.14874	0.0057216	-205.568	0.148046	2.43184	31.8628	1	6	1	12	31.4642	31.8628	31.4334	400.014	399.573	23.6345	23.6634	49.7274	49.7882	500.576	1002	116.726	97.4616	-16.2283	0.0228937	0.0460071	0.0495922	0.107089	0.0495691	1	-1.35514	7.35514	1	0	0.16	111115	5.00576	0.000148046	305.013	304.614	160.321	0.443634	4.73812	48.6152	24.9518	31.6635
10	11:34:21	518.5	0	1.964	0.00589123	-139.424	0.152399	2.4313	31.8609	1	6	1	12	31.4639	31.8609	31.4334	399.995	399.591	23.634	23.6638	49.7274	49.7899	500.58	1002.15	114.82	97.4616	-16.2283	0.0228937	0.0460071	0.0495922	0.107089	0.0495691	1	-1.35514	7.35514	1	0	0.16	111115	5.0058	0.000152399	305.011	304.614	160.344	0.443188	4.73761	48.61	24.9463	31.6624
11	11:41:45	963	0	5.30106	0.0107862	-388.243	0.279098	2.43083	32.1073	1	6	1	12	31.7172	32.1073	31.7036	400.011	398.93	24.3005	24.3549	50.3927	50.5055	500.575	1002.1	125.374	97.4481	-16.2283	0.0228937	0.0460071	0.0495922	0.107089	0.0495691	1	-1.35514	7.35514	1	0	0.16	111115	5.00575	0.000279098	305.257	304.867	160.336	0.426697	4.80417	49.2998	24.9449	31.9122
12	11:41:46	964	0	5.75298	0.0110741	-432.241	0.286542	2.43085	32.1087	1	6	1	12	31.7177	32.1087	31.7041	400.096	398.924	24.3024	24.3582	50.3952	50.511	500.584	1002.14	123.477	97.4486	-16.2283	0.0228937	0.0460071	0.0495922	0.107089	0.0495691	1	-1.35514	7.35514	1	0	0.16	111115	5.00584	0.000286542	305.259	304.868	160.343	0.425712	4.80453	49.3032	24.9449	31.9132
13	11:41:47	964.5	0	5.84097	0.0112617	-430.907	0.291471	2.4315	32.1114	1	6	1	12	31.7189	32.1114	31.7053	400.137	398.947	24.3023	24.3591	50.3918	50.5096	500.596	999.454	123.634	97.4489	-16.2283	0.0228937	0.0460071	0.0495922	0.107089	0.0495691	1	-1.35514	7.35514	1	0	0.16	111115	5.00596	0.000291471	305.261	304.869	159.913	0.423725	4.80527	49.3107	24.9516	31.9151
14	11:41:47	965.5	0	6.27639	0.0120757	-432.651	0.312528	2.43157	32.1139	1	6	1	12	31.72	32.1139	31.7067	400.254	398.975	24.3045	24.3654	50.393	50.5193	500.586	997.771	123.993	97.4486	-16.2283	0.0228937	0.0460071	0.0495922	0.107089	0.0495691	1	-1.35514	7.35514	1	0	0.16	111115	5.00586	0.000312528	305.264	304.87	159.643	0.420107	4.80595	49.3178	24.9524	31.9169
15	11:41:49	967	0	4.92027	0.0114524	-291.063	0.296602	2.43311	32.1193	1	6	1	12	31.7225	32.1193	31.7089	400.151	399.145	24.3069	24.3647	50.391	50.5109	500.581	997.754	124.145	97.4486	-16.2283	0.0228937	0.0460071	0.0495922	0.107089	0.0495691	1	-1.35514	7.35514	1	0	0.16	111115	5.00581	0.000296602	305.269	304.872	159.641	0.422081	4.80742	49.3329	24.9682	31.9209
16	11:46:59	1278	0	13.4463	0.0968086	162.207	2.43666	2.37954	32.2711	1	6	1	12	31.9398	32.2711	31.9142	400.198	397.319	24.8671	25.3415	50.9177	51.8891	500.594	1000.51	94.1345	97.4416	-16.2283	0.0228937	0.0460071	0.0495922	0.107089	0.0495691	1	-1.35514	7.35514	1	0	0.16	111115	5.00594	0.00243666	305.421	305.09	160.081	0.144642	4.84886	49.7617	24.4201	32.1055
17	11:47:01	1279.5	0	13.6858	0.0967078	158.054	2.43356	2.37896	32.2697	1	6	1	12	31.9396	32.2697	31.9152	400.228	397.301	24.8696	25.3434	50.9232	51.8934	500.562	1000.35	94.0931	97.4415	-16.2283	0.0228937	0.0460071	0.0495922	0.107089	0.0495691	1	-1.35514	7.35514	1	0	0.16	111115	5.00562	0.00243356	305.42	305.09	160.057	0.145022	4.84846	49.7577	24.4143	32.1047
18	11:47:03	1281.5	0	13.5502	0.097155	161.271	2.4462	2.38038	32.2767	1	6	1	12	31.9422	32.2767	31.9173	400.199	397.298	24.8723	25.3485	50.9214	51.8966	500.571	1000.33	93.9591	97.4416	-16.2283	0.0228937	0.0460071	0.0495922	0.107089	0.0495691	1	-1.35514	7.35514	1	0	0.16	111115	5.00571	0.0024462	305.427	305.092	160.052	0.143183	4.85038	49.7773	24.4288	32.1094
19	11:47:05	1283.5	0	13.7365	0.0967581	157.307	2.4377	2.38174	32.283	1	6	1	12	31.9448	32.283	31.9199	400.216	397.279	24.8776	25.3522	50.9249	51.8964	500.606	1000.41	93.823	97.4417	-16.2283	0.0228937	0.0460071	0.0495922	0.107089	0.0495691	1	-1.35514	7.35514	1	0	0.16	111115	5.00606	0.0024377	305.433	305.095	160.066	0.144207	4.85209	49.7949	24.4427	32.1139
20	11:47:06	1284.5	0	13.4844	0.0960613	159.887	2.4222	2.38359	32.2892	1	6	1	12	31.9466	32.2892	31.9211	400.227	397.341	24.8791	25.3507	50.9225	51.8878	500.576	1000.52	93.8506	97.4417	-16.2283	0.0228937	0.0460071	0.0495922	0.107089	0.0495691	1	-1.35514	7.35514	1	0	0.16	111115	5.00576	0.0024222	305.439	305.097	160.084	0.146137	4.85381	49.8124	24.4617	32.1179
21	11:58:50	1990	0	4.36616	0.0210064	57.2037	0.514255	2.3008	31.9374	1	6	1	12	31.5328	31.9374	31.5832	400.125	399.212	25.1227	25.2228	52.6344	52.8442	500.576	1000.51	94.5731	97.4271	-16.2283	0.0228937	0.0460071	0.0495922	0.107089	0.0495691	1	-1.35514	7.35514	1	0	0.16	111115	5.00576	0.000514255	305.087	304.683	160.081	0.394573	4.75818	48.8384	23.6156	31.7351
22	11:58:52	1992	0	4.44157	0.0204903	43.2227	0.501437	2.29986	31.9312	1	6	1	12	31.5271	31.9312	31.5776	400.156	399.228	25.1179	25.2156	52.6408	52.8455	500.563	1000.41	90.686	97.4259	-16.2283	0.0228937	0.0460071	0.0495922	0.107089	0.0495691	0.666667	-1.35514	7.35514	1	0	0.16	111115	5.00563	0.000501437	305.081	304.677	160.065	0.396229	4.75651	48.8218	23.6063	31.7291
23	11:58:53	1993.5	0	4.24085	0.0204378	57.8277	0.500418	2.30107	31.9355	1	6	1	12	31.5255	31.9355	31.5763	400.167	399.28	25.1177	25.2152	52.6453	52.8496	500.572	1000.56	87.7559	97.4262	-16.2283	0.0228937	0.0460071	0.0495922	0.107089	0.0495691	0.666667	-1.35514	7.35514	1	0	0.16	111115	5.00572	0.000500418	305.086	304.675	160.09	0.396219	4.75769	48.8338	23.6186	31.7305
24	11:58:55	1995	0	4.5484	0.0208798	41.5598	0.511052	2.30032	31.933	1	6	1	12	31.5218	31.933	31.5728	400.212	399.263	25.1164	25.2159	52.6538	52.8624	500.588	1000.65	87.5122	97.4266	-16.2283	0.0228937	0.0460071	0.0495922	0.107089	0.0495691	0.666667	-1.35514	7.35514	1	0	0.16	111115	5.00588	0.000511052	305.083	304.672	160.105	0.394822	4.75701	48.8266	23.6108	31.7274
25	11:58:57	1996.5	0	4.11076	0.0203645	66.7459	0.499273	2.30403	31.9457	1	6	1	12	31.5221	31.9457	31.5735	400.207	399.346	25.1157	25.2129	52.6514	52.8553	500.584	1000.49	87.3763	97.4266	-16.2283	0.0228937	0.0460071	0.0495922	0.107089	0.0495691	0.666667	-1.35514	7.35514	1	0	0.16	111115	5.00584	0.000499273	305.096	304.672	160.078	0.395835	4.76044	48.8618	23.6489	31.7339
26	12:05:36	2396.5	0	2.22833	0.0076158	-75.0322	0.178584	2.20353	31.3717	1	6	1	12	30.9342	31.3717	30.9837	399.92	399.461	24.6463	24.6811	53.4202	53.4956	500.568	1000.04	110.75	97.4168	-16.2283	0.0228937	0.0460071	0.0495922	0.107089	0.0495691	1	-1.35514	7.35514	1	0	0.16	111115	5.00568	0.000178584	304.522	304.084	160.007	0.437429	4.60788	47.3007	22.6196	31.153
27	12:05:38	2398	0	2.50237	0.00876306	-64.0477	0.205346	2.20224	31.3674	1	6	1	12	30.932	31.3674	30.982	399.939	399.423	24.6428	24.6828	53.4195	53.5062	500.563	1000.12	108.781	97.4167	-16.2283	0.0228937	0.0460071	0.0495922	0.107089	0.0495691	1	-1.35514	7.35514	1	0	0.16	111115	5.00563	0.000205346	304.517	304.082	160.019	0.434022	4.60676	47.2892	22.6064	31.1497
28	12:05:39	2399.5	0	2.19891	0.00902971	2.02526	0.211441	2.20072	31.3611	1	6	1	12	30.9309	31.3611	30.9805	399.889	399.433	24.6402	24.6814	53.4172	53.5065	500.577	999.953	106.94	97.4171	-16.2283	0.0228937	0.0460071	0.0495922	0.107089	0.0495691	1	-1.35514	7.35514	1	0	0.16	111115	5.00577	0.000211441	304.511	304.081	159.992	0.433336	4.60511	47.2721	22.5907	31.146
29	12:05:40	2401	0	2.71148	0.00890697	-93.7269	0.2087	2.20209	31.3662	1	6	1	12	30.9314	31.3662	30.9805	399.949	399.391	24.6401	24.6808	53.4158	53.5039	500.579	1000.08	107.502	97.4172	-16.2283	0.0228937	0.0460071	0.0495922	0.107089	0.0495691	1	-1.35514	7.35514	1	0	0.16	111115	5.00579	0.0002087	304.516	304.081	160.012	0.433587	4.60643	47.2856	22.6048	31.1488
30	12:05:41	2402	0	3.18028	0.00947514	-142.853	0.22208	2.20285	31.3692	1	6	1	12	30.9312	31.3692	30.98	400.008	399.355	24.6381	24.6813	53.4117	53.5055	500.573	1000.05	107.239	97.4171	-16.2283	0.0228937	0.0460071	0.0495922	0.107089	0.0495691	1	-1.35514	7.35514	1	0	0.16	111115	5.00573	0.00022208	304.519	304.081	160.007	0.431697	4.60723	47.2939	22.6125	31.1502
31	12:11:35	2756.5	0	2.76733	0.0576807	309.415	1.3184	2.15728	31.1855	1	6	1	12	30.7985	31.1855	30.8147	400.168	399.51	24.4018	24.6586	53.2984	53.8595	500.576	1000.42	101.664	97.4113	-16.2283	0.0228937	0.0460071	0.0495922	0.107089	0.0495691	1	-1.35514	7.35514	1	0	0.16	111115	5.00576	0.0013184	304.335	303.949	160.066	0.289715	4.55931	46.8047	22.146	30.992
32	12:11:36	2757	0	2.38733	0.0574932	319.62	1.31494	2.15859	31.1902	1	6	1	12	30.7993	31.1902	30.8155	400.125	399.543	24.4014	24.6576	53.2951	53.8547	500.569	1000.54	101.813	97.4113	-16.2283	0.0228937	0.0460071	0.0495922	0.107089	0.0495691	1	-1.35514	7.35514	1	0	0.16	111115	5.00569	0.00131494	304.34	303.949	160.086	0.290088	4.56052	46.8172	22.1596	30.9947
33	12:11:36	2757.5	0	2.73115	0.0577258	310.446	1.3202	2.15852	31.1897	1	6	1	12	30.7996	31.1897	30.8152	400.152	399.501	24.4001	24.6573	53.2911	53.853	500.572	1000.46	101.778	97.411	-16.2283	0.0228937	0.0460071	0.0495922	0.107089	0.0495691	1	-1.35514	7.35514	1	0	0.16	111115	5.00572	0.0013202	304.34	303.95	160.074	0.289388	4.56041	46.8162	22.1589	30.9947
34	12:11:37	2758	0	2.3894	0.0577416	319.837	1.32048	2.15839	31.1894	1	6	1	12	30.7997	31.1894	30.815	400.117	399.535	24.4003	24.6576	53.2914	53.8534	500.568	1000.51	101.796	97.411	-16.2283	0.0228937	0.0460071	0.0495922	0.107089	0.0495691	1	-1.35514	7.35514	1	0	0.16	111115	5.00568	0.00132048	304.339	303.95	160.081	0.289387	4.56032	46.8152	22.1576	30.9945
35	12:11:38	2759	0	2.68726	0.0576539	311.56	1.31855	2.15851	31.1898	1	6	1	12	30.7997	31.1898	30.8157	400.148	399.506	24.4008	24.6577	53.2924	53.8535	500.582	1000.43	101.733	97.4111	-16.2283	0.0228937	0.0460071	0.0495922	0.107089	0.0495691	1	-1.35514	7.35514	1	0	0.16	111115	5.00582	0.00131855	304.34	303.95	160.069	0.289589	4.56044	46.8164	22.1587	30.9948
36	12:16:54	3075.5	0	3.06291	0.0143368	48.8054	0.336026	2.20406	31.2713	1	6	1	12	30.8806	31.2713	30.8776	400.031	399.393	24.3437	24.4092	52.9196	53.062	500.565	1000.68	98.068	97.4049	-16.2283	0.0228937	0.0460071	0.0495922	0.107089	0.0495691	1	-1.35514	7.35514	1	0	0.16	111115	5.00565	0.000336026	304.421	304.031	160.109	0.418764	4.58164	47.037	22.6278	31.076
37	12:16:55	3076.5	0	3.29839	0.0137213	6.74526	0.321474	2.20308	31.2669	1	6	1	12	30.8801	31.2669	30.8767	400.04	399.356	24.3448	24.4075	52.9235	53.0597	500.551	1000.6	96.6133	97.405	-16.2283	0.0228937	0.0460071	0.0495922	0.107089	0.0495691	1	-1.35514	7.35514	1	0	0.16	111115	5.00551	0.000321474	304.417	304.03	160.095	0.420779	4.5805	47.0253	22.6178	31.0735
38	12:16:56	3077.5	0	3.22356	0.0140306	23.43	0.328623	2.20251	31.2647	1	6	1	12	30.8798	31.2647	30.8762	400.001	399.331	24.3434	24.4074	52.9211	53.0603	500.545	1000.68	97.0674	97.4049	-16.2283	0.0228937	0.0460071	0.0495922	0.107089	0.0495691	1	-1.35514	7.35514	1	0	0.16	111115	5.00545	0.000328623	304.415	304.03	160.108	0.41995	4.57991	47.0193	22.6119	31.0723
39	12:16:56	3078	0	3.19221	0.0137671	20.1099	0.322483	2.20267	31.2652	1	6	1	12	30.8808	31.2652	30.8766	400	399.337	24.3443	24.4072	52.9203	53.0569	500.539	1000.67	97.0123	97.4051	-16.2283	0.0228937	0.0460071	0.0495922	0.107089	0.0495691	1	-1.35514	7.35514	1	0	0.16	111115	5.00539	0.000322483	304.415	304.031	160.108	0.420771	4.58005	47.0207	22.6135	31.073
40	12:16:57	3079	0	3.01472	0.0131722	24.8545	0.308649	2.2033	31.2669	1	6	1	12	30.8823	31.2669	30.8774	399.977	399.35	24.3451	24.4053	52.9177	53.0484	500.561	1000.64	97.723	97.4054	-16.2283	0.0228937	0.0460071	0.0495922	0.107089	0.0495691	1	-1.35514	7.35514	1	0	0.16	111115	5.00561	0.000308649	304.417	304.032	160.103	0.422565	4.5805	47.0251	22.6199	31.0746
41	12:23:12	3454.5	0	4.73139	0.0209846	29.4017	0.502275	2.25088	31.5152	1	6	1	12	31.1173	31.5152	31.0998	399.892	398.907	24.4897	24.5876	52.5185	52.7284	500.569	999.334	104.498	97.396	-16.2283	0.0228937	0.0460071	0.0495922	0.107089	0.0495691	1	-1.35514	7.35514	1	0	0.16	111115	5.00569	0.000502275	304.665	304.267	159.893	0.395948	4.64561	47.6982	23.1106	31.3162
42	12:23:13	3455	0	4.78175	0.0215973	35.779	0.516658	2.24977	31.5118	1	6	1	12	31.1163	31.5118	31.0998	399.9	398.903	24.489	24.5897	52.5199	52.7358	500.572	999.447	104.382	97.396	-16.2283	0.0228937	0.0460071	0.0495922	0.107089	0.0495691	1	-1.35514	7.35514	1	0	0.16	111115	5.00572	0.000516658	304.662	304.266	159.912	0.394203	4.64471	47.689	23.0992	31.3141
43	12:23:14	3456	0	4.42096	0.0217676	64.5891	0.520783	2.25003	31.5124	1	6	1	12	31.1178	31.5124	31.1009	399.861	398.936	24.4872	24.5887	52.5115	52.7292	500.557	999.62	104.218	97.3961	-16.2283	0.0228937	0.0460071	0.0495922	0.107089	0.0495691	1	-1.35514	7.35514	1	0	0.16	111115	5.00557	0.000520783	304.662	304.268	159.939	0.393776	4.64487	47.6905	23.1019	31.3151
44	12:23:14	3457	0	4.58991	0.0213282	45.5566	0.510241	2.24983	31.5112	1	6	1	12	31.1181	31.5112	31.1009	399.885	398.927	24.4881	24.5876	52.5126	52.7258	500.548	999.479	103.844	97.3961	-16.2283	0.0228937	0.0460071	0.0495922	0.107089	0.0495691	1	-1.35514	7.35514	1	0	0.16	111115	5.00548	0.000510241	304.661	304.268	159.917	0.395148	4.64456	47.6874	23.0998	31.3147
45	12:23:15	3457.5	0	4.78482	0.0215588	34.9521	0.515707	2.24964	31.5111	1	6	1	12	31.1185	31.5111	31.1015	399.919	398.922	24.4886	24.5891	52.5125	52.728	500.552	999.571	103.633	97.3959	-16.2283	0.0228937	0.0460071	0.0495922	0.107089	0.0495691	1	-1.35514	7.35514	1	0	0.16	111115	5.00552	0.000515707	304.661	304.268	159.931	0.394491	4.64452	47.687	23.0979	31.3148
46	12:37:53	4337.5	0	0.523305	0.0297221	357.198	0.709579	2.24665	31.4228	1	6	1	12	31.0376	31.4228	31.0819	400.081	399.92	24.2493	24.3876	52.2261	52.5239	500.594	1000.52	98.5248	97.3708	-16.2283	0.0228937	0.0460071	0.0495922	0.107089	0.0495691	1	-1.35514	7.35514	1	0	0.16	111115	5.00594	0.000709579	304.573	304.188	160.084	0.369763	4.62129	47.4607	23.0731	31.2302
47	12:38:00	4344	0	0.239664	0.0304951	372.594	0.726163	2.2411	31.399	1	6	1	12	31.0304	31.399	31.0746	400.051	399.945	24.2387	24.3802	52.2247	52.5297	500.575	1000.68	98.6261	97.3707	-16.2283	0.0228937	0.0460071	0.0495922	0.107089	0.0495691	1	-1.35514	7.35514	1	0	0.16	111115	5.00575	0.000726163	304.549	304.18	160.109	0.368267	4.61503	47.3965	23.0162	31.2147
48	12:38:01	4345	0	-0.176344	0.0301572	394.212	0.718121	2.24105	31.3982	1	6	1	12	31.0282	31.3982	31.0738	400.02	399.998	24.2389	24.3789	52.2316	52.5332	500.564	1000.63	98.628	97.3706	-16.2283	0.0228937	0.0460071	0.0495922	0.107089	0.0495691	1	-1.35514	7.35514	1	0	0.16	111115	5.00564	0.000718121	304.548	304.178	160.1	0.369245	4.61484	47.3946	23.0157	31.2132
49	12:38:08	4352	0	-0.147769	0.0293476	392.911	0.699426	2.24278	31.4005	1	6	1	12	31.0242	31.4005	31.0701	400.014	399.987	24.2309	24.3672	52.226	52.5198	500.595	1000.44	98.4364	97.3705	-16.2283	0.0228937	0.0460071	0.0495922	0.107089	0.0495691	1	-1.35514	7.35514	1	0	0.16	111115	5.00595	0.000699426	304.55	304.174	160.071	0.371389	4.61542	47.4006	23.0335	31.2124
50	12:38:34	4378	0	-0.311912	0.0305459	401.111	0.7274	2.24128	31.3835	1	6	1	12	31.001	31.3835	31.0446	400.029	400.033	24.1952	24.337	52.2181	52.5241	500.559	1000.37	100.272	97.37	-16.2283	0.0228937	0.0460071	0.0495922	0.107089	0.0495691	1	-1.35514	7.35514	1	0	0.16	111115	5.00559	0.0007274	304.534	304.151	160.059	0.367457	4.61097	47.3551	23.0181	31.1923
Remark=	"12:40:04 Flow: Fixed -> 500 umol/s"
DATA
Field	Description	Unit
AHs_Cs	Ball-Berry parameter	numeric
alphaK	Used in the conversion of μmol mol-1 to W m-2	numeric
Area	Leaf area in chamber	cm2
BLC_1	One sided BLC	numeric
BLCoffst	Offset as function of area	numeric
BLCond	Total boundary layer conductance for the leaf (includes stomatal ratio)	mol m-2 s-1
BLCslope	Slope as function of area	numeric
C2sfc	Surface CO2	μmol mol-1
Ci	Intercellular CO2 concentration	μmol CO2 mol-1
Ci_Ca	Intercellular CO2 / Ambient CO2	numeric ratio
Ci_Pa	Intercellular CO2	Pa
CndCO2	Total Conductance to CO2	mmol m⁻² s⁻¹
CndTotal	Total conductance	mmol m⁻² s⁻¹
CO2R	Reference cell CO2	μmol CO2 mol-1
CO2S	Sample cell CO2	μmol CO2 mol-1
Cond	Conductance to H2O	mol H2O m-2 s-1		Stomatal conductance
CrMchSD	Standard deviation associated with CrMch	μmol mol-1
CsMch	Sample CO2 offset	μmol mol-1
CsMchSD	Standard deviation associated with CsMch	μmol mol-1
CTair	Computed chamber air temp	degrees Celsius
CTleaf	Computed leaf temp (C). Same as Tleaf°C unless doing energy balance.	degrees Celsius
Ebal	Energy balance flag	integer
f_parin	Fraction of ParIn_μm to use for EB	numeric
f_parout	Fraction of ParOut_μm to use for EB	numeric
fda	Flow / area with units conversion	numeric
Flow	Flow rate to the sample cell	μmol s-1
FTime	Number of seconds since the file was opened	numeric
h20diff	Diff	mmol mol-1
h2o_i	Intercellular H2O	mmol mol-1
H2OR	Reference cell H2O	mmol H2O mol-1
H2OS	Sample cell H2O	mmol H2O mol-1
HrMchSD	Standard deviation associated with HrMch	mmol mol-1
HsMch	Sample H2O offset	mmol mol-1
HsMchSD	Standard deviation associated with HsMch	mmol mol-1
PARi	In-chamber quantum sensor	μmol m-2 s-1
PARo	External quantum sensor	μmol m-2 s-1
Photo	Photosynthetic rate	μmol CO2 m-2 s-1
Press	Atmospheric pressure	kPa
R_W_m2	Incoming radiation	W/m2
RH_R	Relative humidity in the reference cell (%)	numeric percentage
RH_S	Relative humidity in the sample cell (%)	numeric percentage
RHsfc	Surface humidity	numeric percentage
StableF	Stability status as a decimal value	numeric
Status	Numerical status code	numeric
StmRat	Stomatal Ratio	numeric ratio
SVTair	SatVap(Tair)	degrees Celsius
SVTleaf	SatVap(Tleaf)	degrees Celsius
Tair	Temperature in sample cell	degrees Celsius
Tair_K	Air temp in K	Kelvin
TBlk	Temperature of cooler block	degrees Celsius
Tl_minus_Ta	Energy balance delta t	degrees Celsius
Tleaf	Temperature of leaf thermocouple	degrees Celsius
Trans	Transpiration	mol/m2/s
Trmmol	Transpiration rate	mmol H2O m-2 s-1)
Twall_K	Wall temp in K	Kelvin
vp_kPa	Vapor pressure chamber air	kPa
VpdA	Vapor pressure deficit based on Air temp	kPa
VpdL	Vapor pressure deficit based on Leaf temp	kPa
# Essential data for recalculation	# Nonessential default columns	CsMchSD
Area	FTime	HsMchSD
StmRat	EBal?	CrMchSD
Tair	A	HrMchSD
Tleaf	gs Stomatal conductance	Photo
TBlk	Ci	Cond
CO2R	Trmmol
CO2S	VpdL
H2OR	CTleaf
H2OS	BLC_1
Flow	BLCond
PARi	RH_R
Press	RH_S
	PARo
	CsMch
	HsMch
	StableF
	BLCslope
	BLCoffst
	f_parin
	f_parout
	alphaK
	Status
	fda
	Trans
	Tair_K
	Twall_K
	R(W/m2)
	Tl-Ta
	SVTleaf
	h2o_i
	h20diff
	CTair
	SVTair
	CndTotal
	vp_kPa
	VpdA
	CndCO2
	Ci_Pa
	Ci/Ca
	RHsfc
	C2sfc
	AHs/Cs
[truncated: 10 more columns]

## Sheet: Data
Material	Photosynthesis	Transpiration	Stomatal conductance	Intercellular CO2 concentration		Photosynthesis (micro mol CO2 m-2s-1)				Transpiration (mol water m-2s-1)				Stomatal conductance (mol H2O m-2 s-1)				Intercellular CO2 concentration (μmol CO2 mol-1)
N22	2.65786	0.129134	0.00499909	-450.399		N22	M-507			N22	M-507			N22	M-507			N22	M-507
N22	2.32714	0.142955	0.00553032	-276.562		2.65786	3.06291			0.129134	0.336026			0.00499909	0.0143368			-450.399	48.8054
N22	2.61401	0.157386	0.00608735	-290.117		2.32714	3.29839			0.142955	0.321474			0.00553032	0.0137213			-276.562	6.74526
N22	2.14874	0.148046	0.0057216	-205.568		2.61401	3.22356			0.157386	0.328623			0.00608735	0.0140306			-290.117	23.43
N22	1.964	0.152399	0.00589123	-139.424		2.14874	3.19221			0.148046	0.322483			0.0057216	0.0137671			-205.568	20.1099
N22	5.30106	0.279098	0.0107862	-388.243		1.964	3.01472			0.152399	0.308649			0.00589123	0.0131722			-139.424	24.8545
N22	5.75298	0.286542	0.0110741	-432.241		5.30106	4.73139			0.279098	0.502275			0.0107862	0.0209846			-388.243	29.4017
N22	5.84097	0.291471	0.0112617	-430.907		5.75298	4.78175			0.286542	0.516658			0.0110741	0.0215974			-432.241	35.779
N22	6.27639	0.312528	0.0120757	-432.651		5.84097	4.42096			0.291471	0.520783			0.0112617	0.0217676			-430.907	64.5891
N22	4.92027	0.296602	0.0114524	-291.063		6.27639	4.58991			0.312528	0.510241			0.0120757	0.0213282			-432.651	45.5566
N22	13.4463	2.43666	0.0968086	162.207		4.92027	4.78482			0.296602	0.515707			0.0114524	0.0215588			-291.063	34.9521
N22	13.6858	2.43356	0.0967078	158.054		13.4463	0.523305			2.43666	0.709579			0.0968086	0.0297221			162.207	357.198
N22	13.5502	2.4462	0.097155	161.271		13.6858	0.239664			2.43356	0.726163			0.0967078	0.0304951			158.054	372.594
N22	13.7365	2.4377	0.0967581	157.307		13.5502	-0.176344			2.4462	0.718121			0.097155	0.0301572			161.271	394.212
N22	13.4844	2.4222	0.0960613	159.887		13.7365	-0.147769			2.4377	0.699426			0.0967581	0.0293476			157.307	392.911
M-507	3.06291	0.336026	0.0143368	48.8054		13.4844	-0.311912			2.4222	0.7274			0.0960613	0.0305459			159.887	401.111
M-507	3.29839	0.321474	0.0137213	6.74526	Mean	7.18044	2.61517		Mean	0.958166	0.517574		Mean	0.0378914	0.0217688		Mean	-169.23	150.15
M-507	3.22356	0.328623	0.0140306	23.43	%	36.4207			%	54.0172			%	57.4506			%	-88.7255
M-507	3.19221	0.322483	0.0137671	20.1099
M-507	3.01472	0.308649	0.0131722	24.8545
M-507	4.73139	0.502275	0.0209846	29.4017
M-507	4.78175	0.516658	0.0215974	35.779
M-507	4.42096	0.520783	0.0217676	64.5891
M-507	4.58991	0.510241	0.0213282	45.5566
M-507	4.78482	0.515707	0.0215588	34.9521
M-507	0.523305	0.709579	0.0297221	357.198
M-507	0.239664	0.726163	0.0304951	372.594
M-507	-0.176344	0.718121	0.0301572	394.212
M-507	-0.147769	0.699426	0.0293476	392.911
M-507	-0.311912	0.7274	0.0305459	401.111

## Sheet: Sheet1
Trait	N22	N22	N22	N22	N22	N22	N22	N22	N22	N22	N22	N22	N22	N22	N22	M-507	M-507	M-507	M-507	M-507	M-507	M-507	M-507	M-507	M-507	M-507	M-507	M-507	M-507	M-507	t-test
Photosynthesis	2.65786	2.32714	2.61401	2.14874	1.964	5.30106	5.75298	5.84097	6.27639	4.92027	13.4463	13.6858	13.5502	13.7365	13.4844	3.06291	3.29839	3.22356	3.19221	3.01472	4.73139	4.78175	4.42096	4.58991	4.78482	0.523305	0.239664	-0.176344	-0.147769	-0.311912	0.00237824
Transpiration	0.129134	0.142955	0.157386	0.148046	0.152399	0.279098	0.286542	0.291471	0.312528	0.296602	2.43666	2.43356	2.4462	2.4377	2.4222	0.336026	0.321474	0.328623	0.322483	0.308649	0.502275	0.516658	0.520783	0.510241	0.515707	0.709579	0.726163	0.718121	0.699426	0.7274	0.130597
Stomatal conductance	0.00499909	0.00553032	0.00608735	0.0057216	0.00589123	0.0107862	0.0110741	0.0112617	0.0120757	0.0114524	0.0968086	0.0967078	0.097155	0.0967581	0.0960613	0.0143368	0.0137213	0.0140306	0.0137671	0.0131722	0.0209846	0.0215974	0.0217676	0.0213282	0.0215588	0.0297221	0.0304951	0.0301572	0.0293476	0.0305459	0.163696
Intercellular CO2 concentration	-450.399	-276.562	-290.117	-205.568	-139.424	-388.243	-432.241	-430.907	-432.651	-291.063	162.207	158.054	161.271	157.307	159.887	48.8054	6.74526	23.43	20.1099	24.8545	29.4017	35.779	64.5891	45.5566	34.9521	357.198	372.594	394.212	392.911	401.111	0.000407089

## Sheet: Sheet 2
	Photosynthesis (micro mol CO2 m-2s-1)		Transpiration (mol water m-2s-1)		Stomatal conductance (mol H2O m-2 s-1)		Intercellular CO2 concentration (μmol CO2 mol-1)
	N22	M-507	N22	M-507	N22	M-507	N22	M-507
	2.65786	3.06291	0.129134	0.336026	0.00499909	0.0143368	-450.399	48.8054
	2.32714	3.29839	0.142955	0.321474	0.00553032	0.0137213	-276.562	6.74526
	2.61401	3.22356	0.157386	0.328623	0.00608735	0.0140306	-290.117	23.43
	2.14874	3.19221	0.148046	0.322483	0.0057216	0.0137671	-205.568	20.1099
	1.964	3.01472	0.152399	0.308649	0.00589123	0.0131722	-139.424	24.8545
	5.30106	4.73139	0.279098	0.502275	0.0107862	0.0209846	-388.243	29.4017
	5.75298	4.78175	0.286542	0.516658	0.0110741	0.0215974	-432.241	35.779
	5.84097	4.42096	0.291471	0.520783	0.0112617	0.0217676	-430.907	64.5891
	6.27639	4.58991	0.312528	0.510241	0.0120757	0.0213282	-432.651	45.5566
	4.92027	4.78482	0.296602	0.515707	0.0114524	0.0215588	-291.063	34.9521
	13.4463	0.523305	2.43666	0.709579	0.0968086	0.0297221	162.207	357.198
	13.6858	0.239664	2.43356	0.726163	0.0967078	0.0304951	158.054	372.594
	13.5502	-0.176344	2.4462	0.718121	0.097155	0.0301572	161.271	394.212
	13.7365	-0.147769	2.4377	0.699426	0.0967581	0.0293476	157.307	392.911
	13.4844	-0.311912	2.4222	0.7274	0.0960613	0.0305459	159.887	401.111
Mean	7.18044	2.61517	0.958166	0.517574	0.0378914	0.0217688	-169.23	150.15
SD	4.89574	2.01039	1.08296	0.166223	0.043111	0.00688131	256.123	171.657
SEM	2.82656	1.1607	0.625248	0.0959689	0.0248902	0.00397293	147.873	99.1063
SD	4.9	2.01	1.08	0.17	0.04	0.01	256.12	171.66
SEM	2.83	1.16	0.63	0.1	0.02	0.04	147.87	99.11

## Sheet: Figure_4
Trait	N22	M-507		Trait	N22	M-507		Trait	N22	M-507		Trait	N22	M-507
Photo (micro mol CO2 m-2s-1)	7.18	2.62		Trmmol (mol water m-2s-1)	0.96	0.52		Cond (mol H2O m-2 s-1)	0.04	0.02		Ci (μmol CO2 mol-1)	-169.23	150.15
	SEM (N22& M-507)
Photosynthesis (micro mol CO2 m-2s-1)	2.83	1.16
Transpiration (mol water m-2s-1)	0.63	0.1
Stomatal conductance (mol H2O m-2 s-1)	0.02	0.04
Intercellular CO2 concentration (μmol CO2 mol-1)	147.87	99.11

## Sheet: Table_3
Table s3. Photosynthetic characteristics of N22 and M-507.
Trait	N22	M-507
Photosynthesis (micro mol CO2 m-2s-1)	7.18+2.83	2.62+1.16
Intercellular CO2 concentration (μmol CO2 mol-1)	-169.23+147.87	150.15+99.11
Stomatal conductance (mol H2O m-2 s-1)	0.04+0.02	0.02+0.04
Transpiration (mol water m-2s-1)	0.96+0.63	0.52+0.1
